# Supplementary material for: Genomic Variation in Korean japonica Rice Varieties
Source: Genes (Basel). 2021 Oct 30;12(11):1749. doi: 10.3390/genes12111749 (PMC8623644; doi:10.3390/genes12111749)
Supplement: Supplementary file 1 [file genes-12-01749-s001.zip]

Archive with 7 entries (7 files):
- Figure_S1.pdf
- TableS1_primer_sequence.xlsx
- TableS2_sequencing_data_stat.xlsx
- TableS3_indel_info.xlsx
- TableS4_Indel_S20_info.xlsx
- TableS5_high_moderate_impact_variants.xlsx
- TableS6_high_modearate_impact_variants_in_agri_genes.xlsx
