# Supplementary material for: Genomic Variation in Korean japonica Rice Varieties
Source: Genes (Basel). 2021 Oct 30;12(11):1749. doi: 10.3390/genes12111749 (PMC8623644; doi:10.3390/genes12111749)
Supplement: Supplementary file 1 [file genes-12-01749-s001.zip › TableS1_primer_sequence.xlsx]

## Sheet: Sheet1
Table S1. Prmier Squences of Markers Developed in this Study
No.	Marker name	Forward primer sequence	Reverse primer sequence	Restriction enzyme	Marker type
1	qPHS11_ind_1	GGCAGTTGACATAACAAAGT	GTTCTGTTCTTCGGTTTGAT	-	InDel
2	qPHS11_ind_2	CTTCAAGAATGCTCTGTTTC	AATCTACCTTAGCTCACC	-	InDel
3	qPHS11_ind_3	CTTCAAGAATGCTCTGTTTC	AATCTACCTTAGCTCACC	-	InDel
4	qPHS11_ind_4	ATCTAGGGGGAGTTGAACCA	CAGTATTTTTGCCCGGTTTT	-	InDel
5	qPHS11_ind_5	TGTCTTGGGTTGAAAATGCT	ATGGATAGGGATGAAAACGG	-	InDel
6	qPHS11_ind_6	TGGTAAAAGAGTTCGGTCTG	AGTGAAGGTGTGCGATATGA	-	InDel
7	qPHS11_ind_8	ACTCCTCGTATACAGATCCTT	TTCCCCCCCAAATCAATATTC	-	InDel
8	qPHS11_ind_9	TGGAAAGCACCAGGATTGA	TTGGTATGGAACACGTCTG	-	InDel
9	HPI_01	GGGGTACCGAGCGTAAAAGAA	GAGGAGGTGGAGAAGGTGGA	-	InDel
10	HPI_02	GCTAGGTACAAGAGTTGGGG	GGTGCTTGGTTTATTTGCGTGA	-	InDel
11	HPI_03	CGAAGGAAATAAAGAACAGAGG	TTTTGGAGTGGGGGATATTTG	-	InDel
12	HPI_04	GGAGAGGAGAGGAGAGAGGA	GGAGTTAGCCCATAGCAGAG	-	InDel
13	Hd1	AGTACTTTGATCTTGTCGGG	ATAGATGAACTCACGCTGTT	-	InDel
14	GS3	TCATGATCAAAAACTGGGGT	TTGGCTTGATTTCCTGTGCT	PstI	CAPS
15	Hd6	TTGCAAGCAGTGAGAATGGT	GCCTGTGAAGAAAAAGAAGGT	HindIII	CAPS
16	sd1	AGGAATTTGTGGGGAATTGT	GCTGCGTGAAGCGCATGAGCT	SacI	dCAPS
