# Supplementary material for: Genomic Variation in Korean japonica Rice Varieties
Source: Genes (Basel). 2021 Oct 30;12(11):1749. doi: 10.3390/genes12111749 (PMC8623644; doi:10.3390/genes12111749)
Supplement: Supplementary file 1 [file genes-12-01749-s001.zip › TableS2_sequencing_data_stat.xlsx]

## Sheet: Sheet1
Table S2. Summary of the genome resequencing data
No.	Variety	Raw data			After read mapping
		No. of read	Nucleotides (bp)	depth (ⅹ)	No. of read	Nucleotides (bp)	depth (ⅹ)
1	Cheongho	201958834	30495783934	81.7044	194594223	28619209585	76.6766
2	Dami	188591342	28477292642	76.2964	185052148	27413449107	73.4462
3	Dongan	193603230	29234087730	78.324	180896601	26823735493	71.8662
4	Dongjin	204586220	20663208220	55.3609	197004769	19008029917	50.9263
5	Giho	226594766	22886071366	61.3164	216618316	20785099263	55.6875
6	Haechanmulgyeol	168415072	25430675872	68.1339	163297577	23988476353	64.27
7	Hiami	147966550	14944621550	40.0397	138410752	13512153634	36.2018
8	Hwacheong	251447722	25396219922	68.0416	241282454	23194766592	62.1435
9	Hwayeong	216569822	21873552022	58.6037	207573640	19904426956	53.328
10	Ilpum	225038108	22728848908	60.8952	216621466	20870795773	55.9171
11	Jinbu43	150220228	15172243028	40.6495	142894707	13903880926	37.2513
12	Jopyeong	261936960	39280103892	105.239	261773271	38934382773	104.313
13	Joun	147885312	14936416512	40.0177	139344695	13565083405	36.3436
14	Junam	425212084	55987435584	150.002	403574111	52013078989	139.354
15	Nampyeong	426572058	43083777858	115.43	397622719	38617935897	103.465
16	Odae	144090148	14553104948	38.9907	136313618	13281283348	35.5832
17	Saeilmi	286667218	43286749918	115.974	279086140	40680545824	108.991
18	Saenuri	283067568	28589824368	76.5979	269793882	26627061207	71.3393
19	Samgwang	311859288	31497788088	84.3889	303089238	30005579186	80.391
20	Seogan	182632082	27577444382	73.8855	176319277	25871686586	69.3155
21	Seomyeong	214260298	32353304998	86.681	206780822	30372442985	81.3739
22	Sindongjin	175861804	26555132404	71.1466	170582458	24750489939	66.3116
23	Sobi	185760704	28049866304	75.1512	179679735	26045728883	69.7818
24	Unbong40	149133902	15062524102	40.3555	138548144	13465424646	36.0766
	mean	2.23747e+08	27421503273	73.4677	2.14448e+08	2.55106e+10	68.3481
