# Supplementary material for: Genomic Variation in Korean japonica Rice Varieties
Source: Genes (Basel). 2021 Oct 30;12(11):1749. doi: 10.3390/genes12111749 (PMC8623644; doi:10.3390/genes12111749)
Supplement: Supplementary file 1 [file genes-12-01749-s001.zip › TableS3_indel_info.xlsx]

## Sheet: KJV24_variants.snpEff.varonly.h
Table S3. Information of InDels detected in this study
Chromosome	Position (bp)	Reference allele	Alternative allele	Quality	Genotype of varieties (0: reference allele, 1: the first alternative allele, 2: the second alternative allele, 3: the third alternative allele, etc.., /: not-phased genotype, |: phased genotype, ./.: missing genotype)																								Annotation
					Cheongho	Dami	Dongan	Dongjin	Giho	Haechanmulgyeol	Hiami	Hwacheong	Hwayeong	Ilpum	Jinbu43	Jopyeong	Joun	Junam	Nampyeong	Odae	Saeilmi	Saenuri	Samgwang	Seogan	Seomyeong	Sindongjin	Sobi	Unbong40
chr01	11075	TAACCAGAAAACCGGATAGGACGG	T	3070.79	0/0	0/0	0/0	0/0	0/0	0/0	0/0	0/0	0/0	0/0	1/1	0/0	0/0	0/0	0/0	1/1	0/0	0/0	0/0	0/0	0/0	0/0	0/0	0/0	T|upstream_gene_variant|MODIFIER|OS01G0100200|OS01G0100200|transcript|OS01T0100200-01|protein_coding||c.-722_-700delAACCAGAAAACCGGATAGGACGG|||||142|,T|upstream_gene_variant|MODIFIER|OS01G0100400|OS01G0100400|transcript|OS01T0100400-01|protein_coding||c.-1698_-1676delAACCAGAAAACCGGATAGGACGG|||||1645|,T|downstream_gene_variant|MODIFIER|OS01G0100100|OS01G0100100|transcript|OS01T0100100-01|protein_co…
chr01	20836	GA	G	2096.79	0/0	0/0	0/0	0/0	0/0	0/0	0/0	0/0	0/0	0/0	1/1	0/0	0/0	0/0	0/0	1/1	0/0	0/0	0/0	0/0	0/0	0/0	0/0	0/0	G|upstream_gene_variant|MODIFIER|EPlOSAG00000029741|EPlOSAG00000029741|transcript|EPlOSAT00000031129|lincRNA||n.-1595delA|||||1595|,G|downstream_gene_variant|MODIFIER|OS01G0100500|OS01G0100500|transcript|OS01T0100500-01|protein_coding||c.*1244delA|||||693|,G|downstream_gene_variant|MODIFIER|EPlOSAG00000030290|EPlOSAG00000030290|transcript|EPlOSAT00000031678|lincRNA||n.*1595delT|||||1595|,G|interg…
chr01	23314	GTATC	G	3920.2	0/0	0/0	0/0	0/0	1/1	0/0	0/0	1/1	0/0	0/0	1/1	0/0	1/1	0/0	0/0	1/1	0/0	0/0	0/0	0/0	0/0	0/0	0/0	0/0	G|upstream_gene_variant|MODIFIER|EPlOSAG00000030290|EPlOSAG00000030290|transcript|EPlOSAT00000031678|lincRNA||n.-776_-773delGATA|||||773|,G|downstream_gene_variant|MODIFIER|EPlOSAG00000029741|EPlOSAG00000029741|transcript|EPlOSAT00000031129|lincRNA||n.*773_*776delTATC|||||773|,G|intron_variant|MODIFIER|OS01G0100600|OS01G0100600|transcript|OS01T0100600-01|protein_coding|1/5|c.50+34_50+37delTATC|||…
chr01	178109	T	TG	2378.83	0/0	0/0	0/0	0/0	0/0	0/0	0/0	0/0	0/0	0/0	1/1	0/0	0/0	0/0	0/0	1/1	0/0	0/0	0/0	0/0	0/0	0/0	0/0	0/0	TG|upstream_gene_variant|MODIFIER|OS01G0103100|OS01G0103100|transcript|OS01T0103100-01|protein_coding||c.-533_-532insG|||||497|,TG|upstream_gene_variant|MODIFIER|OS01G0103100|OS01G0103100|transcript|OS01T0103100-02|protein_coding||c.-569_-568insG|||||542|,TG|downstream_gene_variant|MODIFIER|OS01G0103075|OS01G0103075|transcript|OS01T0103075-00|protein_coding||c.*1402_*1403insC|||||705|,TG|intergen…
chr01	201845	CA	C	2935.95	0/0	0/0	0/0	0/0	1/1	0/0	0/0	1/1	0/0	0/0	0/0	0/0	1/1	0/0	0/0	0/0	0/0	0/0	0/0	0/0	0/0	0/0	0/0	0/0	C|upstream_gene_variant|MODIFIER|OS01G0103900|OS01G0103900|transcript|OS01T0103900-01|protein_coding||c.-196delA|||||98|,C|downstream_gene_variant|MODIFIER|OS01G0103800|OS01G0103800|transcript|OS01T0103800-01|protein_coding||c.*1367delA|||||1043|,C|intergenic_region|MODIFIER|OS01G0103800-OS01G0103900|OS01G0103800-OS01G0103900|intergenic_region|OS01G0103800-OS01G0103900|||n.201846delA||||||
chr01	208858	TTAA	T	1202.75	0/0	0/0	0/0	0/0	0/0	0/0	0/0	./.	0/0	0/0	1/1	0/0	0/0	0/0	0/0	1/1	0/0	0/0	0/0	0/0	0/0	0/0	0/0	0/0	T|upstream_gene_variant|MODIFIER|OS01G0104100|OS01G0104100|transcript|OS01T0104100-01|protein_coding||c.-912_-910delTAA|||||912|WARNING_TRANSCRIPT_NO_START_CODON,T|upstream_gene_variant|MODIFIER|OS01G0104100|OS01G0104100|transcript|OS01T0104100-02|protein_coding||c.-936_-934delTAA|||||935|WARNING_TRANSCRIPT_NO_START_CODON,T|intron_variant|MODIFIER|OS01G0104000|OS01G0104000|transcript|OS01T0104000…
chr01	209480	T	TGAAGAA	1111.83	0/0	0/0	0/0	0/0	0/0	0/0	0/0	0/0	0/0	0/0	1/1	0/0	0/0	0/0	0/0	1/1	0/0	0/0	0/0	0/0	0/0	0/0	0/0	0/0	TGAAGAA|conservative_inframe_insertion|MODERATE|OS01G0104000|OS01G0104000|transcript|OS01T0104000-01|protein_coding|1/4|c.40_45dupTTCTTC|p.Phe14_Phe15dup|126/2065|45/1668|15/555||,TGAAGAA|conservative_inframe_insertion|MODERATE|OS01G0104000|OS01G0104000|transcript|OS01T0104000-02|protein_coding|1/4|c.40_45dupTTCTTC|p.Phe14_Phe15dup|101/2040|45/1665|15/554||,TGAAGAA|upstream_gene_variant|MODIFIER|…
chr01	236925	G	GGA	972.84	0/0	0/0	0/0	0/0	0/0	0/0	0/0	0/0	0/0	0/0	1/1	0/0	0/0	0/0	0/0	1/1	0/0	0/0	0/0	0/0	0/0	0/0	0/0	0/0	GGA|intergenic_region|MODIFIER|EPlOSAG00000023432-OS01G0104500|EPlOSAG00000023432-OS01G0104500|intergenic_region|EPlOSAG00000023432-OS01G0104500|||n.236925_236926insGA||||||
chr01	259163	C	CCT	29473.8	./.	1/1	1/1	1/1	0/0	0/0	0/0	0/0	1/1	0/0	1/1	1/1	0/0	1/1	1/1	1/1	1/1	1/1	1/1	0/0	1/1	1/1	1/1	1/1	CCT|downstream_gene_variant|MODIFIER|EPlOSAG00000009292|EPlOSAG00000009292|transcript|EPlOSAT00000010680|lincRNA||n.*1676_*1677insAG|||||1676|,CCT|intergenic_region|MODIFIER|OS01G0104600-EPlOSAG00000009292|OS01G0104600-EPlOSAG00000009292|intergenic_region|OS01G0104600-EPlOSAG00000009292|||n.259163_259164insCT||||||
chr01	282896	T	TTTA	29983.4	1/1	1/1	1/1	1/1	0/0	0/0	0/0	0/0	1/1	0/0	1/1	1/1	0/0	1/1	1/1	1/1	1/1	1/1	1/1	0/0	1/1	1/1	1/1	1/1	TTTA|upstream_gene_variant|MODIFIER|EPlOSAG00000000651|EPlOSAG00000000651|transcript|EPlOSAT00000002039|lincRNA||n.-249_-248insTAA|||||249|,TTTA|upstream_gene_variant|MODIFIER|EPlOSAG00000012007|EPlOSAG00000012007|transcript|EPlOSAT00000013395|lincRNA||n.-168_-167insTAA|||||168|,TTTA|downstream_gene_variant|MODIFIER|OS01G0105300|OS01G0105300|transcript|OS01T0105300-01|protein_coding||c.*2034_*203…
chr01	325340	TA	T	1306.06	0/0	0/0	0/0	0/0	0/0	1/1	0/0	0/0	0/0	0/0	0/0	0/0	0/0	0/0	0/0	0/0	0/0	0/0	0/0	0/0	0/0	0/0	0/0	0/0	T|upstream_gene_variant|MODIFIER|OS01G0106300|OS01G0106300|transcript|OS01T0106300-01|protein_coding||c.-1495delT|||||1418|,T|downstream_gene_variant|MODIFIER|OS01G0106400|OS01G0106400|transcript|OS01T0106400-01|protein_coding||c.*1996delT|||||1787|,T|intergenic_region|MODIFIER|OS01G0106300-OS01G0106400|OS01G0106300-OS01G0106400|intergenic_region|OS01G0106300-OS01G0106400|||n.325341delA||||||
chr01	371237	AT	A	23453.3	1/1	1/1	1/1	1/1	0/0	1/1	0/0	0/0	1/1	0/0	1/1	1/1	0/0	1/1	1/1	1/1	1/1	1/1	1/1	0/0	1/1	1/1	1/1	1/1	A|upstream_gene_variant|MODIFIER|OS01G0106800|OS01G0106800|transcript|OS01T0106800-01|protein_coding||c.-673delT|||||593|,A|downstream_gene_variant|MODIFIER|OS01G0106700|OS01G0106700|transcript|OS01T0106700-00|protein_coding||c.*586delT|||||586|,A|downstream_gene_variant|MODIFIER|OS01G0106750|OS01G0106750|transcript|OS01T0106750-00|lincRNA||n.*40delT|||||40|,A|intergenic_region|MODIFIER|OS01G0106…
chr01	386900	T	TTATATATATATA	110.81	0/0	0/0	0/0	0/0	0/0	0/0	0/0	0/0	0/0	./.	0/0	0/0	./.	0/0	0/0	./.	0/0	./.	./.	./.	1/1	0/0	0/0	./.	TTATATATATATA|upstream_gene_variant|MODIFIER|OS01G0107000|OS01G0107000|transcript|OS01T0107000-02|protein_coding||c.-353_-352insTATATATATATA|||||280|,TTATATATATATA|upstream_gene_variant|MODIFIER|OS01G0107000|OS01G0107000|transcript|OS01T0107000-01|protein_coding||c.-353_-352insTATATATATATA|||||253|,TTATATATATATA|intergenic_region|MODIFIER|OS01G0107000-OS01G0107400|OS01G0107000-OS01G0107400|interg…
chr01	409756	TTA	T	945.98	./.	0/0	0/0	0/0	0/0	0/0	1/1	0/0	0/0	0/0	0/0	0/0	0/0	0/0	0/0	0/0	0/0	0/0	0/0	./.	0/0	0/0	0/0	0/0	T|intergenic_region|MODIFIER|EPlOSAG00000009742-OS01G0107700|EPlOSAG00000009742-OS01G0107700|intergenic_region|EPlOSAG00000009742-OS01G0107700|||n.409757_409758delTA||||||
chr01	431976	GT	G	34643	1/1	1/1	1/1	1/1	0/0	1/1	0/0	0/0	1/1	0/0	1/1	1/1	0/0	1/1	1/1	1/1	1/1	1/1	1/1	0/0	1/1	1/1	1/1	1/1	G|downstream_gene_variant|MODIFIER|OS01G0108000|OS01G0108000|transcript|OS01T0108000-01|protein_coding||c.*1004delT|||||760|,G|intergenic_region|MODIFIER|OS01G0108000-OS01G0108200|OS01G0108000-OS01G0108200|intergenic_region|OS01G0108000-OS01G0108200|||n.431977delT||||||
chr01	444338	AT	A	2423	0/0	0/0	0/0	0/0	0/0	0/0	0/0	0/0	0/0	0/0	1/1	0/0	0/0	0/0	0/0	1/1	0/0	0/0	0/0	0/0	0/0	0/0	0/0	0/0	A|upstream_gene_variant|MODIFIER|EPlOSAG00000052697|EPlOSAG00000052697|transcript|EPlOSAT00000000203|lincRNA||n.-272delT|||||272|,A|intron_variant|MODIFIER|OS01G0108200|OS01G0108200|transcript|OS01T0108200-01|protein_coding|5/11|c.763-827delT||||||
chr01	456512	A	ATC	345.13	0/0	0/0	0/0	0/0	0/0	0/0	1/1	0/0	0/0	0/0	0/0	0/0	0/0	0/0	0/0	0/0	0/0	0/0	0/0	0/0	0/0	0/0	0/0	0/0	ATC|downstream_gene_variant|MODIFIER|EPlOSAG00000029008|EPlOSAG00000029008|transcript|EPlOSAT00000030396|lincRNA||n.*1487_*1488insTC|||||1488|,ATC|intron_variant|MODIFIER|OS01G0108400|OS01G0108400|transcript|OS01T0108400-00|protein_coding|1/2|c.202-170_202-169insTC||||||
chr01	458457	CT	C	420.12	./.	0/0	0/0	0/0	0/0	0/0	1/1	0/0	0/0	0/0	0/0	0/0	0/0	0/0	0/0	0/0	0/0	0/0	0/0	0/0	0/0	0/0	0/0	0/0	C|upstream_gene_variant|MODIFIER|OS01G0108500|OS01G0108500|transcript|OS01T0108500-00|protein_coding||c.-1949delT|||||1719|,C|downstream_gene_variant|MODIFIER|OS01G0108400|OS01G0108400|transcript|OS01T0108400-00|protein_coding||c.*1115delT|||||1033|,C|intergenic_region|MODIFIER|OS01G0108400-OS01G0108500|OS01G0108400-OS01G0108500|intergenic_region|OS01G0108400-OS01G0108500|||n.458458delT||||||
chr01	479055	CA	C	4581.73	0/0	0/0	0/0	0/0	0/0	0/0	1/1	0/0	0/0	1/1	0/0	0/0	0/0	0/0	0/0	0/0	0/0	0/0	0/0	1/1	0/0	0/0	0/0	0/0	C|intron_variant|MODIFIER|OS01G0108600|OS01G0108600|transcript|OS01T0108600-02|protein_coding|1/1|c.264+240delA||||||,C|intron_variant|MODIFIER|OS01G0108600|OS01G0108600|transcript|OS01T0108600-01|protein_coding|1/2|c.264+240delA||||||
chr01	495943	CCT	C	1591.06	0/0	0/0	0/0	0/0	0/0	0/0	0/0	0/0	0/0	1/1	0/0	0/0	0/0	0/0	0/0	0/0	0/0	0/0	0/0	0/0	0/0	0/0	0/0	0/0	C|3_prime_UTR_variant|MODIFIER|OS01G0109000|OS01G0109000|transcript|OS01T0109000-01|protein_coding|2/2|c.*14_*15delAG|||||14|WARNING_TRANSCRIPT_NO_START_CODON
chr01	497735	TAGA	T	6026.73	0/0	0/0	0/0	0/0	0/0	0/0	1/1	0/0	0/0	1/1	0/0	0/0	0/0	0/0	0/0	0/0	0/0	0/0	0/0	1/1	0/0	0/0	0/0	0/0	T|upstream_gene_variant|MODIFIER|OS01G0109000|OS01G0109000|transcript|OS01T0109000-01|protein_coding||c.-1513_-1511delTCT|||||483|WARNING_TRANSCRIPT_NO_START_CODON,T|upstream_gene_variant|MODIFIER|OS01G0109300|OS01G0109300|transcript|OS01T0109300-01|protein_coding||c.-992_-990delAGA|||||932|,T|downstream_gene_variant|MODIFIER|OS01G0109201|OS01G0109201|transcript|OS01T0109201-01|protein_coding||c.…
chr01	528995	GTATATATATATATATATATATATATATATATA	GTATATATATATATATATATATATATATATATATATA,GTATATATATATATATATATATATATATATATATATATATA,G	1052.44	0/0	0/0	1/1	0/0	0/0	0/0	3/3	0/0	0/0	0/0	0/0	0/0	./.	0/0	./.	./.	2/2	0/0	0/0	0/0	0/0	0/0	0/0	./.	G|upstream_gene_variant|MODIFIER|OS01G0109750|OS01G0109750|transcript|OS01T0109750-01|protein_coding||c.-2264_-2233delTATATATATATATATATATATATATATATATA|||||1016|,GTATATATATATATATATATATATATATATATATATA|upstream_gene_variant|MODIFIER|OS01G0109750|OS01G0109750|transcript|OS01T0109750-01|protein_coding||c.-2265_-2264insTATA|||||1048|,GTATATATATATATATATATATATATATATATATATATATA|upstream_gene_variant|MODIF…
chr01	531684	G	GA	2474.18	0/0	0/0	0/0	0/0	0/0	0/0	1/1	0/0	0/0	1/1	0/0	0/0	0/0	0/0	0/0	0/0	0/0	0/0	0/0	1/1	0/0	0/0	0/0	0/0	GA|intergenic_region|MODIFIER|OS01G0109750-OS01G0110050|OS01G0109750-OS01G0110050|intergenic_region|OS01G0109750-OS01G0110050|||n.531684_531685insA||||||
chr01	532506	T	TA	3259.77	0/0	0/0	0/0	0/0	0/0	0/0	1/1	0/0	0/0	1/1	0/0	0/0	0/0	0/0	0/0	0/0	0/0	0/0	0/0	1/1	0/0	0/0	0/0	0/0	TA|intergenic_region|MODIFIER|OS01G0109750-OS01G0110050|OS01G0109750-OS01G0110050|intergenic_region|OS01G0109750-OS01G0110050|||n.532506_532507insA||||||
chr01	535077	T	TG	4209.77	0/0	0/0	0/0	0/0	0/0	0/0	1/1	0/0	0/0	1/1	0/0	0/0	0/0	0/0	0/0	0/0	0/0	0/0	0/0	1/1	0/0	0/0	0/0	0/0	TG|downstream_gene_variant|MODIFIER|OS01G0110050|OS01G0110050|transcript|OS01T0110050-01|protein_coding||c.*2839_*2840insC|||||1895|WARNING_TRANSCRIPT_NO_START_CODON,TG|intergenic_region|MODIFIER|OS01G0109750-OS01G0110050|OS01G0109750-OS01G0110050|intergenic_region|OS01G0109750-OS01G0110050|||n.535077_535078insG||||||
chr01	539422	A	AT	3437.77	0/0	0/0	0/0	0/0	0/0	0/0	1/1	0/0	0/0	1/1	0/0	0/0	0/0	0/0	0/0	0/0	0/0	0/0	0/0	1/1	0/0	0/0	0/0	0/0	AT|upstream_gene_variant|MODIFIER|OS01G0110050|OS01G0110050|transcript|OS01T0110050-01|protein_coding||c.-925_-924insA|||||779|WARNING_TRANSCRIPT_NO_START_CODON,AT|intron_variant|MODIFIER|PHO1-1|OS01G0110100|transcript|OS01T0110100-01|protein_coding|2/11|c.584-426_584-425insT||||||
chr01	547073	AT	A	3265.97	0/0	0/0	0/0	0/0	0/0	0/0	1/1	0/0	0/0	1/1	0/0	0/0	0/0	0/0	0/0	0/0	0/0	0/0	0/0	1/1	0/0	0/0	0/0	0/0	A|upstream_gene_variant|MODIFIER|EPlOSAG00000004445|EPlOSAG00000004445|transcript|EPlOSAT00000005833|lincRNA||n.-472delT|||||472|,A|downstream_gene_variant|MODIFIER|EPlOSAG00000010199|EPlOSAG00000010199|transcript|EPlOSAT00000011587|lincRNA||n.*1377delA|||||1377|,A|intergenic_region|MODIFIER|OS01G0110200-EPlOSAG00000004445|OS01G0110200-EPlOSAG00000004445|intergenic_region|OS01G0110200-EPlOSAG0000…
chr01	563933	G	GAT	641.47	0/0	0/0	0/0	0/0	0/0	0/0	0/0	0/0	0/0	0/0	0/0	0/0	0/0	0/0	0/0	0/0	0/0	0/0	0/0	0/0	0/0	0/0	1/1	0/0	GAT|upstream_gene_variant|MODIFIER|EPlOSAG00000048043|EPlOSAG00000048043|transcript|EPlOSAT00000049431|lincRNA||n.-1277_-1276insAT|||||1276|,GAT|intron_variant|MODIFIER|OS01G0110700|OS01G0110700|transcript|OS01T0110700-01|protein_coding|17/19|c.1946+62_1946+63insAT||||||,GAT|intron_variant|MODIFIER|OS01G0110700|OS01G0110700|transcript|OS01T0110700-02|protein_coding|9/11|c.1100+62_1100+63insAT||||…
chr01	597937	C	CAT	1829.64	0/0	0/0	0/0	0/0	0/0	0/0	1/1	0/0	0/0	1/1	0/0	0/0	0/0	0/0	0/0	0/0	0/0	0/0	0/0	1/1	0/0	0/0	0/0	0/0	CAT|upstream_gene_variant|MODIFIER|OS01G0111400|OS01G0111400|transcript|OS01T0111400-01|protein_coding||c.-781_-780insAT|||||352|,CAT|upstream_gene_variant|MODIFIER|OS01G0111400|OS01G0111400|transcript|OS01T0111400-02|protein_coding||c.-365_-364insAT|||||362|WARNING_TRANSCRIPT_NO_START_CODON,CAT|downstream_gene_variant|MODIFIER|OS01G0111300|OS01G0111300|transcript|OS01T0111300-01|protein_coding||…
chr01	626128	CTCT	C	6776.33	0/0	0/0	0/0	0/0	1/1	0/0	1/1	1/1	0/0	0/0	0/0	0/0	1/1	0/0	0/0	0/0	0/0	0/0	0/0	0/0	0/0	0/0	0/0	0/0	C|5_prime_UTR_variant|MODIFIER|OS01G0111900|OS01G0111900|transcript|OS01T0111900-01|protein_coding|1/1|c.-62_-60delCTT|||||60|INFO_REALIGN_3_PRIME,C|downstream_gene_variant|MODIFIER|OS01G0111800|OS01G0111800|transcript|OS01T0111800-01|protein_coding||c.*1659_*1661delTCT|||||1516|,C|downstream_gene_variant|MODIFIER|OS01G0111800|OS01G0111800|transcript|OS01T0111800-02|protein_coding||c.*1659_*1661d…
chr01	639993	CT	C	3731.76	0/0	0/0	0/0	0/0	1/1	0/0	0/0	1/1	0/0	0/0	0/0	0/0	1/1	0/0	0/0	0/0	0/0	0/0	0/0	0/0	0/0	0/0	0/0	0/0	C|upstream_gene_variant|MODIFIER|OS01G0112100|OS01G0112100|transcript|OS01T0112100-01|protein_coding||c.-1029delA|||||979|,C|downstream_gene_variant|MODIFIER|OS01G0112201|OS01G0112201|transcript|OS01T0112201-01|protein_coding||c.*977delT|||||934|,C|downstream_gene_variant|MODIFIER|EPlOSAG00000010705|EPlOSAG00000010705|transcript|EPlOSAT00000012093|lincRNA||n.*826delT|||||826|,C|downstream_gene_va…
chr01	640721	T	TATAGATAGATAGATAG	5250.77	0/0	0/0	0/0	0/0	1/1	0/0	0/0	1/1	0/0	0/0	0/0	0/0	1/1	0/0	0/0	0/0	0/0	0/0	0/0	0/0	0/0	0/0	0/0	0/0	TATAGATAGATAGATAG|3_prime_UTR_variant|MODIFIER|OS01G0112300|OS01G0112300|transcript|OS01T0112300-01|protein_coding|11/11|c.*1432_*1447dupCTATCTATCTATCTAT|||||2387|,TATAGATAGATAGATAG|upstream_gene_variant|MODIFIER|OS01G0112100|OS01G0112100|transcript|OS01T0112100-01|protein_coding||c.-1772_-1757dupCTATCTATCTATCTAT|||||1707|,TATAGATAGATAGATAG|downstream_gene_variant|MODIFIER|OS01G0112201|OS01G01122…
chr01	653699	CA	C	2731.83	0/0	0/0	0/0	0/0	0/0	0/0	0/0	0/0	0/0	1/1	0/0	0/0	0/0	0/0	0/0	0/0	0/0	0/0	0/0	1/1	0/0	0/0	0/0	0/0	C|upstream_gene_variant|MODIFIER|OS01G0112500|OS01G0112500|transcript|OS01T0112500-01|protein_coding||c.-1955delT|||||1831|,C|downstream_gene_variant|MODIFIER|EPlOSAG00000046008|EPlOSAG00000046008|transcript|EPlOSAT00000047396|lincRNA||n.*1823delA|||||1823|,C|intergenic_region|MODIFIER|EPlOSAG00000046008-EPlOSAG00000009405|EPlOSAG00000046008-EPlOSAG00000009405|intergenic_region|EPlOSAG00000046008…
chr01	659172	A	AG	6411.77	0/0	0/0	0/0	0/0	1/1	0/0	0/0	1/1	0/0	0/0	0/0	0/0	1/1	0/0	0/0	0/0	0/0	0/0	0/0	0/0	0/0	0/0	0/0	0/0	AG|intergenic_region|MODIFIER|EPlOSAG00000046008-EPlOSAG00000009405|EPlOSAG00000046008-EPlOSAG00000009405|intergenic_region|EPlOSAG00000046008-EPlOSAG00000009405|||n.659172_659173insG||||||
chr01	678451	AT	A	842.12	./.	0/0	0/0	0/0	0/0	0/0	1/1	0/0	0/0	0/0	0/0	0/0	0/0	0/0	0/0	0/0	0/0	0/0	0/0	0/0	0/0	0/0	0/0	0/0	A|downstream_gene_variant|MODIFIER|OS01G0112600|OS01G0112600|transcript|OS01T0112600-01|protein_coding||c.*1115delT|||||850|WARNING_TRANSCRIPT_NO_START_CODON,A|intergenic_region|MODIFIER|OS01G0112600-OS01G0112800|OS01G0112600-OS01G0112800|intergenic_region|OS01G0112600-OS01G0112800|||n.678452delT||||||
chr01	685157	TA	T	1956.79	0/0	0/0	0/0	0/0	1/1	0/0	0/0	1/1	0/0	0/0	0/0	0/0	1/1	0/0	0/0	0/0	0/0	0/0	0/0	0/0	0/0	0/0	0/0	0/0	T|intergenic_region|MODIFIER|OS01G0112600-OS01G0112800|OS01G0112600-OS01G0112800|intergenic_region|OS01G0112600-OS01G0112800|||n.685158delA||||||
chr01	715607	TAAATGAAC	T	4803.75	0/0	0/0	0/0	0/0	1|1	0/0	0/0	1|1	0/0	0/0	0/0	0/0	.	0/0	0/0	0/0	0/0	0/0	0/0	0/0	0/0	0/0	0/0	0/0	T|downstream_gene_variant|MODIFIER|OS01G0113150|OS01G0113150|transcript|OS01T0113150-00|protein_coding||c.*2763_*2770delAAATGAAC|||||1376|WARNING_TRANSCRIPT_NO_START_CODON,T|intergenic_region|MODIFIER|OS01G0113150-EPlOSAG00000038600|OS01G0113150-EPlOSAG00000038600|intergenic_region|OS01G0113150-EPlOSAG00000038600|||n.715608_715615delAAATGAAC||||||
chr01	718215	A	AC	5732.77	0/0	0/0	0/0	0/0	1/1	0/0	0/0	1/1	0/0	0/0	0/0	0/0	1/1	0/0	0/0	0/0	0/0	0/0	0/0	0/0	0/0	0/0	0/0	0/0	AC|intergenic_region|MODIFIER|OS01G0113150-EPlOSAG00000038600|OS01G0113150-EPlOSAG00000038600|intergenic_region|OS01G0113150-EPlOSAG00000038600|||n.718215_718216insC||||||
chr01	719436	CT	C	2207.95	0/0	0/0	0/0	0/0	1/1	0/0	0/0	1/1	0/0	0/0	0/0	0/0	1/1	0/0	0/0	0/0	0/0	0/0	0/0	0/0	0/0	0/0	0/0	0/0	C|upstream_gene_variant|MODIFIER|EPlOSAG00000049773|EPlOSAG00000049773|transcript|EPlOSAT00000051161|lincRNA||n.-891delT|||||891|,C|upstream_gene_variant|MODIFIER|EPlOSAG00000037355|EPlOSAG00000037355|transcript|EPlOSAT00000038743|lincRNA||n.-1097delT|||||1097|,C|downstream_gene_variant|MODIFIER|EPlOSAG00000038600|EPlOSAG00000038600|transcript|EPlOSAT00000039988|lincRNA||n.*870delA|||||870|,C|dow…
chr01	722458	T	TA	4917.77	0/0	0/0	0/0	0/0	1/1	0/0	0/0	1/1	0/0	0/0	0/0	0/0	1/1	0/0	0/0	0/0	0/0	0/0	0/0	0/0	0/0	0/0	0/0	0/0	TA|upstream_gene_variant|MODIFIER|EPlOSAG00000038600|EPlOSAG00000038600|transcript|EPlOSAT00000039988|lincRNA||n.-1991_-1990insT|||||1991|,TA|upstream_gene_variant|MODIFIER|EPlOSAG00000037140|EPlOSAG00000037140|transcript|EPlOSAT00000038528|lincRNA||n.-1782_-1781insT|||||1782|,TA|upstream_gene_variant|MODIFIER|EPlOSAG00000048367|EPlOSAG00000048367|transcript|EPlOSAT00000049755|lincRNA||n.-1823_-1…
chr01	723389	ATTCTGTGAGTGCAGT	A	7281.73	0/0	0/0	0/0	0/0	1/1	0/0	0/0	1/1	0/0	0/0	0/0	0/0	1/1	0/0	0/0	0/0	0/0	0/0	0/0	0/0	0/0	0/0	0/0	0/0	A|upstream_gene_variant|MODIFIER|OS01G0113200|OS01G0113200|transcript|OS01T0113200-01|protein_coding||c.-121_-107delACTGCACTCACAGAA|||||73|,A|upstream_gene_variant|MODIFIER|OS01G0113300|OS01G0113300|transcript|OS01T0113300-01|protein_coding||c.-354_-340delTTCTGTGAGTGCAGT|||||303|,A|upstream_gene_variant|MODIFIER|EPlOSAG00000050457|EPlOSAG00000050457|transcript|EPlOSAT00000051845|lincRNA||n.-1158_…
chr01	724512	AT	A	3740.28	0/0	0/0	0/0	0/0	1/1	0/0	0/0	1/1	0/0	0/0	0/0	0/0	1/1	0/0	0/0	0/0	0/0	0/0	0/0	0/0	0/0	0/0	0/0	0/0	A|3_prime_UTR_variant|MODIFIER|OS01G0113325|OS01G0113325|transcript|OS01T0113325-00|protein_coding|2/2|c.*779delA|||||843|,A|upstream_gene_variant|MODIFIER|OS01G0113200|OS01G0113200|transcript|OS01T0113200-01|protein_coding||c.-1230delA|||||1196|,A|upstream_gene_variant|MODIFIER|EPlOSAG00000050457|EPlOSAG00000050457|transcript|EPlOSAT00000051845|lincRNA||n.-35delT|||||35|,A|intron_variant|MODIFIE…
chr01	726385	C	CT	349.66	0/0	0/0	0/0	0/0	1/1	0/0	0/0	1/1	0/0	0/0	0/0	0/0	1/1	0/0	0/0	0/0	0/0	0/0	0/0	0/0	0/0	0/0	0/0	0/0	CT|upstream_gene_variant|MODIFIER|OS01G0113325|OS01G0113325|transcript|OS01T0113325-00|protein_coding||c.-533_-532insA|||||501|,CT|downstream_gene_variant|MODIFIER|OS01G0113300|OS01G0113300|transcript|OS01T0113300-01|protein_coding||c.*500_*501insT|||||287|,CT|downstream_gene_variant|MODIFIER|EPlOSAG00000050457|EPlOSAG00000050457|transcript|EPlOSAT00000051845|lincRNA||n.*1763_*1764insT|||||1764|,…
chr01	726797	G	GTTGGCCGAGCGGCACA	521.23	0/0	0/0	0/0	0/0	./.	0/0	0/0	1/1	0/0	0/0	0/0	0/0	./.	0/0	0/0	0/0	0/0	0/0	0/0	0/0	0/0	0/0	0/0	0/0	GTTGGCCGAGCGGCACA|upstream_gene_variant|MODIFIER|OS01G0113325|OS01G0113325|transcript|OS01T0113325-00|protein_coding||c.-945_-944insTGTGCCGCTCGGCCAA|||||913|,GTTGGCCGAGCGGCACA|downstream_gene_variant|MODIFIER|OS01G0113300|OS01G0113300|transcript|OS01T0113300-01|protein_coding||c.*912_*913insTTGGCCGAGCGGCACA|||||699|,GTTGGCCGAGCGGCACA|intergenic_region|MODIFIER|OS01G0113300-OS01G0113350|OS01G01133…
chr01	728623	TA	T	3874.73	0/0	0/0	0/0	0/0	1|1	0/0	0/0	1|1	0/0	0/0	0/0	0/0	1|1	0/0	0/0	0/0	0/0	0/0	0/0	0/0	0/0	0/0	0/0	0/0	T|upstream_gene_variant|MODIFIER|OS01G0113350|OS01G0113350|transcript|OS01T0113350-00|protein_coding||c.-344delA|||||344|,T|intergenic_region|MODIFIER|OS01G0113300-OS01G0113350|OS01G0113300-OS01G0113350|intergenic_region|OS01G0113300-OS01G0113350|||n.728624delA||||||
chr01	728700	G	GAGTACTATTTTGTTACCA	5047.98	0/0	0/0	0/0	0/0	1|1	0/0	0/0	1|1	0/0	0/0	0/0	0/0	1|1	0/0	0/0	0/0	0/0	0/0	0/0	0/0	0/0	0/0	0/0	0/0	GAGTACTATTTTGTTACCA|upstream_gene_variant|MODIFIER|OS01G0113350|OS01G0113350|transcript|OS01T0113350-00|protein_coding||c.-268_-267insAGTACTATTTTGTTACCA|||||267|,GAGTACTATTTTGTTACCA|intergenic_region|MODIFIER|OS01G0113300-OS01G0113350|OS01G0113300-OS01G0113350|intergenic_region|OS01G0113300-OS01G0113350|||n.728700_728701insAGTACTATTTTGTTACCA||||||
chr01	730961	CG	C	7115.73	0/0	0/0	0/0	0/0	1|1	0/0	0/0	1|1	0/0	0/0	0/0	0/0	1|1	0/0	0/0	0/0	0/0	0/0	0/0	0/0	0/0	0/0	0/0	0/0	C|3_prime_UTR_variant|MODIFIER|OS01G0113350|OS01G0113350|transcript|OS01T0113350-00|protein_coding|1/1|c.*36delG|||||36|,C|upstream_gene_variant|MODIFIER|OS01G0113450|OS01G0113450|transcript|OS01T0113450-00|protein_coding||c.-2322delG|||||527|,C|downstream_gene_variant|MODIFIER|EPlOSAG00000003682|EPlOSAG00000003682|transcript|EPlOSAT00000005070|lincRNA||n.*106delC|||||106|,C|downstream_gene_varia…
chr01	731093	TATTGTTTG	T	4342.73	0/0	0/0	0/0	0/0	1/1	0/0	0/0	1/1	0/0	0/0	0/0	0/0	1/1	0/0	0/0	0/0	0/0	0/0	0/0	0/0	0/0	0/0	0/0	0/0	T|3_prime_UTR_variant|MODIFIER|OS01G0113350|OS01G0113350|transcript|OS01T0113350-00|protein_coding|1/1|c.*175_*182delGATTGTTT|||||175|INFO_REALIGN_3_PRIME,T|upstream_gene_variant|MODIFIER|OS01G0113450|OS01G0113450|transcript|OS01T0113450-00|protein_coding||c.-2190_-2183delATTGTTTG|||||395|,T|downstream_gene_variant|MODIFIER|OS01G0113400|OS01G0113400|transcript|OS01T0113400-01|protein_coding||c.*3…
chr01	731175	A	AACAAGGAAATCAGACATTGAAAGGAAATTGGGGATTAGAGGGACTGATTCATGATATTTTG	1232.41	0/0	0/0	0/0	0/0	1|1	0/0	0/0	./.	0/0	0/0	0/0	0/0	./.	0/0	0/0	0/0	0/0	0/0	0/0	0/0	0/0	0/0	0/0	0/0	AACAAGGAAATCAGACATTGAAAGGAAATTGGGGATTAGAGGGACTGATTCATGATATTTTG|3_prime_UTR_variant|MODIFIER|OS01G0113400|OS01G0113400|transcript|OS01T0113400-02|protein_coding|1/1|c.*308_*309insCAAAATATCATGAATCAGTCCCTCTAATCCCCAATTTCCTTTCAATGTCTGATTTCCTTGT|||||308|WARNING_TRANSCRIPT_NO_START_CODON,AACAAGGAAATCAGACATTGAAAGGAAATTGGGGATTAGAGGGACTGATTCATGATATTTTG|upstream_gene_variant|MODIFIER|EPlOSAG00000003682|EPlO…
chr01	732316	TAG	T	917.36	0/0	0/0	0/0	0/0	./.	0/0	0/0	./.	0/0	0/0	0/0	0/0	1|1	0/0	0/0	0/0	0/0	0/0	0/0	0/0	0/0	0/0	0/0	0/0	T|frameshift_variant|HIGH|OS01G0113400|OS01G0113400|transcript|OS01T0113400-01|protein_coding|6/6|c.1200_1201delCT|p.Asn400fs|1648/2662|1200/2034|400/677||WARNING_TRANSCRIPT_NO_START_CODON,T|frameshift_variant|HIGH|OS01G0113400|OS01G0113400|transcript|OS01T0113400-02|protein_coding|1/1|c.219_220delCT|p.Asn73fs|222/1389|219/1053|73/350||WARNING_TRANSCRIPT_NO_START_CODON,T|5_prime_UTR_variant|MODIF…
chr01	732323	CT	C	827.36	0/0	0/0	0/0	0/0	./.	0/0	0/0	./.	0/0	0/0	0/0	0/0	1|1	0/0	0/0	0/0	0/0	0/0	0/0	0/0	0/0	0/0	0/0	0/0	C|frameshift_variant|HIGH|OS01G0113400|OS01G0113400|transcript|OS01T0113400-01|protein_coding|6/6|c.1194delA|p.Asp399fs|1641/2662|1194/2034|398/677||WARNING_TRANSCRIPT_NO_START_CODON,C|frameshift_variant|HIGH|OS01G0113400|OS01G0113400|transcript|OS01T0113400-02|protein_coding|1/1|c.213delA|p.Asp72fs|215/1389|213/1053|71/350||WARNING_TRANSCRIPT_NO_START_CODON,C|5_prime_UTR_variant|MODIFIER|OS01G01…
chr01	733137	TTG	T	1878.73	0/0	0/0	0/0	0/0	1|1	0/0	0/0	1|1	0/0	0/0	0/0	0/0	1|1	0/0	0/0	0/0	0/0	0/0	0/0	0/0	0/0	0/0	0/0	0/0	T|frameshift_variant|HIGH|OS01G0113400|OS01G0113400|transcript|OS01T0113400-01|protein_coding|4/6|c.601_602delCA|p.Gln201fs|1049/2662|601/2034|201/677||WARNING_TRANSCRIPT_NO_START_CODON,T|5_prime_UTR_variant|MODIFIER|OS01G0113450|OS01G0113450|transcript|OS01T0113450-00|protein_coding|2/2|c.-146_-145delTG|||||145|,T|upstream_gene_variant|MODIFIER|EPlOSAG00000003682|EPlOSAG00000003682|transcript|EP…
chr01	733140	G	GCA	1968.77	0/0	0/0	0/0	0/0	1|1	0/0	0/0	1|1	0/0	0/0	0/0	0/0	1|1	0/0	0/0	0/0	0/0	0/0	0/0	0/0	0/0	0/0	0/0	0/0	GCA|frameshift_variant|HIGH|OS01G0113400|OS01G0113400|transcript|OS01T0113400-01|protein_coding|4/6|c.599_600insTG|p.Gln201fs|1046/2662|599/2034|200/677||WARNING_TRANSCRIPT_NO_START_CODON,GCA|5_prime_UTR_variant|MODIFIER|OS01G0113450|OS01G0113450|transcript|OS01T0113450-00|protein_coding|2/2|c.-144_-143insCA|||||143|,GCA|upstream_gene_variant|MODIFIER|EPlOSAG00000003682|EPlOSAG00000003682|transcr…
chr01	733147	T	TCGG	2643.77	0/0	0/0	0/0	0/0	1|1	0/0	0/0	1|1	0/0	0/0	0/0	0/0	1|1	0/0	0/0	0/0	0/0	0/0	0/0	0/0	0/0	0/0	0/0	0/0	TCGG|conservative_inframe_insertion|MODERATE|OS01G0113400|OS01G0113400|transcript|OS01T0113400-01|protein_coding|4/6|c.592_593insCCG|p.Lys198delinsThrGlu|1039/2662|592/2034|198/677||WARNING_TRANSCRIPT_NO_START_CODON,TCGG|5_prime_UTR_variant|MODIFIER|OS01G0113450|OS01G0113450|transcript|OS01T0113450-00|protein_coding|2/2|c.-137_-136insCGG|||||136|,TCGG|upstream_gene_variant|MODIFIER|OS01G0113500|O…
chr01	733148	TA	T	2643.73	0/0	0/0	0/0	0/0	1|1	0/0	0/0	1|1	0/0	0/0	0/0	0/0	1|1	0/0	0/0	0/0	0/0	0/0	0/0	0/0	0/0	0/0	0/0	0/0	T|frameshift_variant|HIGH|OS01G0113400|OS01G0113400|transcript|OS01T0113400-01|protein_coding|4/6|c.591delT|p.Lys199fs|1038/2662|591/2034|197/677||WARNING_TRANSCRIPT_NO_START_CODON,T|5_prime_UTR_variant|MODIFIER|OS01G0113450|OS01G0113450|transcript|OS01T0113450-00|protein_coding|2/2|c.-135delA|||||135|,T|upstream_gene_variant|MODIFIER|OS01G0113500|OS01G0113500|transcript|OS01T0113500-01|protein_c…
chr01	733151	CA	C	2733.73	0/0	0/0	0/0	0/0	1|1	0/0	0/0	1|1	0/0	0/0	0/0	0/0	1|1	0/0	0/0	0/0	0/0	0/0	0/0	0/0	0/0	0/0	0/0	0/0	C|frameshift_variant|HIGH|OS01G0113400|OS01G0113400|transcript|OS01T0113400-01|protein_coding|4/6|c.588delT|p.Ser196fs|1035/2662|588/2034|196/677||WARNING_TRANSCRIPT_NO_START_CODON,C|5_prime_UTR_variant|MODIFIER|OS01G0113450|OS01G0113450|transcript|OS01T0113450-00|protein_coding|2/2|c.-132delA|||||132|,C|upstream_gene_variant|MODIFIER|OS01G0113500|OS01G0113500|transcript|OS01T0113500-01|protein_c…
chr01	733153	C	CTGT	2778.77	0/0	0/0	0/0	0/0	1|1	0/0	0/0	1|1	0/0	0/0	0/0	0/0	1|1	0/0	0/0	0/0	0/0	0/0	0/0	0/0	0/0	0/0	0/0	0/0	CTGT|conservative_inframe_insertion|MODERATE|OS01G0113400|OS01G0113400|transcript|OS01T0113400-01|protein_coding|4/6|c.586_587insACA|p.Ala195_Ser196insAsn|1033/2662|586/2034|196/677||WARNING_TRANSCRIPT_NO_START_CODON,CTGT|5_prime_UTR_variant|MODIFIER|OS01G0113450|OS01G0113450|transcript|OS01T0113450-00|protein_coding|2/2|c.-129_-128insTTG|||||128|INFO_REALIGN_3_PRIME,CTGT|upstream_gene_variant|MO…
chr01	733158	A	AT	2868.77	0/0	0/0	0/0	0/0	1|1	0/0	0/0	1|1	0/0	0/0	0/0	0/0	1|1	0/0	0/0	0/0	0/0	0/0	0/0	0/0	0/0	0/0	0/0	0/0	AT|frameshift_variant|HIGH|OS01G0113400|OS01G0113400|transcript|OS01T0113400-01|protein_coding|4/6|c.581_582insA|p.Ala195fs|1028/2662|581/2034|194/677||WARNING_TRANSCRIPT_NO_START_CODON,AT|5_prime_UTR_variant|MODIFIER|OS01G0113450|OS01G0113450|transcript|OS01T0113450-00|protein_coding|2/2|c.-126_-125insT|||||125|,AT|upstream_gene_variant|MODIFIER|OS01G0113500|OS01G0113500|transcript|OS01T0113500-…
chr01	733166	A	AGACC	3225.77	0/0	0/0	0/0	0/0	1|1	0/0	0/0	1|1	0/0	0/0	0/0	0/0	1|1	0/0	0/0	0/0	0/0	0/0	0/0	0/0	0/0	0/0	0/0	0/0	AGACC|frameshift_variant|HIGH|OS01G0113400|OS01G0113400|transcript|OS01T0113400-01|protein_coding|4/6|c.573_574insGGTC|p.Trp192fs|1020/2662|573/2034|191/677||WARNING_TRANSCRIPT_NO_START_CODON,AGACC|5_prime_UTR_variant|MODIFIER|OS01G0113450|OS01G0113450|transcript|OS01T0113450-00|protein_coding|2/2|c.-118_-117insGACC|||||117|,AGACC|upstream_gene_variant|MODIFIER|OS01G0113500|OS01G0113500|transcrip…
chr01	734804	TTA	T	3363.73	0/0	0/0	0/0	0/0	1|1	0/0	0/0	1|1	0/0	0/0	0/0	0/0	1|1	0/0	0/0	0/0	0/0	0/0	0/0	0/0	0/0	0/0	0/0	0/0	T|frameshift_variant|HIGH|OS01G0113500|OS01G0113500|transcript|OS01T0113500-01|protein_coding|1/3|c.563_564delAT|p.Tyr188fs|736/2542|563/1911|188/636||INFO_REALIGN_3_PRIME,T|downstream_gene_variant|MODIFIER|OS01G0113450|OS01G0113450|transcript|OS01T0113450-00|protein_coding||c.*1249_*1250delTA|||||1086|,T|intron_variant|MODIFIER|OS01G0113400|OS01G0113400|transcript|OS01T0113400-01|protein_coding|…
chr01	734808	G	GGCT	3543.77	0/0	0/0	0/0	0/0	1|1	0/0	0/0	1|1	0/0	0/0	0/0	0/0	1|1	0/0	0/0	0/0	0/0	0/0	0/0	0/0	0/0	0/0	0/0	0/0	GGCT|stop_gained&disruptive_inframe_insertion|HIGH|OS01G0113500|OS01G0113500|transcript|OS01T0113500-01|protein_coding|1/3|c.565_566insGCT|p.Glu189delinsGlyTer|739/2542|566/1911|189/636||,GGCT|downstream_gene_variant|MODIFIER|OS01G0113450|OS01G0113450|transcript|OS01T0113450-00|protein_coding||c.*1252_*1253insGCT|||||1090|,GGCT|intron_variant|MODIFIER|OS01G0113400|OS01G0113400|transcript|OS01T011…
chr01	734810	AG	A	3543.73	0/0	0/0	0/0	0/0	1|1	0/0	0/0	1|1	0/0	0/0	0/0	0/0	1|1	0/0	0/0	0/0	0/0	0/0	0/0	0/0	0/0	0/0	0/0	0/0	A|frameshift_variant|HIGH|OS01G0113500|OS01G0113500|transcript|OS01T0113500-01|protein_coding|1/3|c.568delG|p.Asp190fs|741/2542|568/1911|190/636||,A|downstream_gene_variant|MODIFIER|OS01G0113450|OS01G0113450|transcript|OS01T0113450-00|protein_coding||c.*1255delG|||||1092|,A|intron_variant|MODIFIER|OS01G0113400|OS01G0113400|transcript|OS01T0113400-01|protein_coding|3/5|c.59-1130delC||||||WARNING_T…
chr01	734870	CGGT	C	3813.73	0/0	0/0	0/0	0/0	1|1	0/0	0/0	1|1	0/0	0/0	0/0	0/0	1|1	0/0	0/0	0/0	0/0	0/0	0/0	0/0	0/0	0/0	0/0	0/0	C|disruptive_inframe_deletion|MODERATE|OS01G0113500|OS01G0113500|transcript|OS01T0113500-01|protein_coding|1/3|c.629_631delGTG|p.Gly210del|802/2542|629/1911|210/636||INFO_REALIGN_3_PRIME,C|downstream_gene_variant|MODIFIER|OS01G0113450|OS01G0113450|transcript|OS01T0113450-00|protein_coding||c.*1315_*1317delGGT|||||1152|,C|intron_variant|MODIFIER|OS01G0113400|OS01G0113400|transcript|OS01T0113400-01…
chr01	734877	G	GGA	3543.77	0/0	0/0	0/0	0/0	1|1	0/0	0/0	1|1	0/0	0/0	0/0	0/0	1|1	0/0	0/0	0/0	0/0	0/0	0/0	0/0	0/0	0/0	0/0	0/0	GGA|frameshift_variant|HIGH|OS01G0113500|OS01G0113500|transcript|OS01T0113500-01|protein_coding|1/3|c.634_635insGA|p.Val212fs|808/2542|635/1911|212/636||,GGA|downstream_gene_variant|MODIFIER|OS01G0113450|OS01G0113450|transcript|OS01T0113450-00|protein_coding||c.*1321_*1322insGA|||||1159|,GGA|intron_variant|MODIFIER|OS01G0113400|OS01G0113400|transcript|OS01T0113400-01|protein_coding|3/5|c.59-1197_…
chr01	734881	C	CATTT	3273.76	0/0	0/0	0/0	0/0	1|1	0/0	0/0	1|1	0/0	0/0	0/0	0/0	1|1	0/0	0/0	0/0	0/0	0/0	0/0	0/0	0/0	0/0	0/0	0/0	CATTT|frameshift_variant|HIGH|OS01G0113500|OS01G0113500|transcript|OS01T0113500-01|protein_coding|1/3|c.638_639insATTT|p.Ala214fs|812/2542|639/1911|213/636||,CATTT|downstream_gene_variant|MODIFIER|OS01G0113450|OS01G0113450|transcript|OS01T0113450-00|protein_coding||c.*1325_*1326insATTT|||||1163|,CATTT|intron_variant|MODIFIER|OS01G0113400|OS01G0113400|transcript|OS01T0113400-01|protein_coding|3/5|…
chr01	734888	T	TGGC	2733.74	0/0	0/0	0/0	0/0	1|1	0/0	0/0	1|1	0/0	0/0	0/0	0/0	1|1	0/0	0/0	0/0	0/0	0/0	0/0	0/0	0/0	0/0	0/0	0/0	TGGC|disruptive_inframe_insertion|MODERATE|OS01G0113500|OS01G0113500|transcript|OS01T0113500-01|protein_coding|1/3|c.647_648insCGG|p.Gly216dup|821/2542|648/1911|216/636||INFO_REALIGN_3_PRIME,TGGC|downstream_gene_variant|MODIFIER|OS01G0113450|OS01G0113450|transcript|OS01T0113450-00|protein_coding||c.*1332_*1333insGGC|||||1170|,TGGC|intron_variant|MODIFIER|OS01G0113400|OS01G0113400|transcript|OS01T…
chr01	736012	A	AC	2522.77	0/0	0/0	0/0	0/0	1|1	0/0	0/0	1|1	0/0	0/0	0/0	0/0	1|1	0/0	0/0	0/0	0/0	0/0	0/0	0/0	0/0	0/0	0/0	0/0	AC|intron_variant|MODIFIER|OS01G0113400|OS01G0113400|transcript|OS01T0113400-01|protein_coding|3/5|c.58+1304_58+1305insG||||||WARNING_TRANSCRIPT_NO_START_CODON,AC|intron_variant|MODIFIER|OS01G0113500|OS01G0113500|transcript|OS01T0113500-01|protein_coding|2/2|c.842-17_842-16insC||||||
chr01	737234	G	GTGGATCATCACTCTCC	10789.8	0/0	0/0	0/0	0/0	1/1	0/0	0/0	1/1	0/0	0/0	0/0	0/0	1/1	0/0	0/0	0/0	0/0	0/0	0/0	0/0	0/0	0/0	0/0	0/0	GTGGATCATCACTCTCC|3_prime_UTR_variant|MODIFIER|OS01G0113500|OS01G0113500|transcript|OS01T0113500-01|protein_coding|3/3|c.*136_*137insTGGATCATCACTCTCC|||||137|,GTGGATCATCACTCTCC|upstream_gene_variant|MODIFIER|OS01G0113650|OS01G0113650|transcript|OS01T0113650-00|protein_coding||c.-1694_-1693insTGGATCATCACTCTCC|||||1673|,GTGGATCATCACTCTCC|downstream_gene_variant|MODIFIER|OS01G0113600|OS01G0113600|tr…
chr01	737448	G	GGA	8088.77	0/0	0/0	0/0	0/0	1|1	0/0	0/0	1|1	0/0	0/0	0/0	0/0	1|1	0/0	0/0	0/0	0/0	0/0	0/0	0/0	0/0	0/0	0/0	0/0	GGA|3_prime_UTR_variant|MODIFIER|OS01G0113500|OS01G0113500|transcript|OS01T0113500-01|protein_coding|3/3|c.*350_*351insGA|||||351|,GGA|upstream_gene_variant|MODIFIER|OS01G0113650|OS01G0113650|transcript|OS01T0113650-00|protein_coding||c.-1480_-1479insGA|||||1459|,GGA|downstream_gene_variant|MODIFIER|OS01G0113600|OS01G0113600|transcript|OS01T0113600-01|protein_coding||c.*3059_*3060insTC|||||834|,G…
chr01	737599	GCATATTC	G	7121.73	0/0	0/0	0/0	0/0	1/1	0/0	0/0	1/1	0/0	0/0	0/0	0/0	1/1	0/0	0/0	0/0	0/0	0/0	0/0	0/0	0/0	0/0	0/0	0/0	G|5_prime_UTR_variant|MODIFIER|OS01G0113400|OS01G0113400|transcript|OS01T0113400-01|protein_coding|2/6|c.-123_-117delGAATATG|||||226|WARNING_TRANSCRIPT_NO_START_CODON,G|upstream_gene_variant|MODIFIER|OS01G0113650|OS01G0113650|transcript|OS01T0113650-00|protein_coding||c.-1328_-1322delCATATTC|||||1308|,G|downstream_gene_variant|MODIFIER|OS01G0113500|OS01G0113500|transcript|OS01T0113500-01|protein_…
chr01	737795	TGGCGTTTCTA	T	783.04	0/0	0/0	0/0	0/0	1|1	0/0	0/0	0/0	0/0	0/0	0/0	0/0	./.	0/0	0/0	0/0	0/0	0/0	0/0	0/0	0/0	0/0	0/0	0/0	T|5_prime_UTR_variant|MODIFIER|OS01G0113400|OS01G0113400|transcript|OS01T0113400-01|protein_coding|1/6|c.-232_-223delTAGAAACGCC|||||422|WARNING_TRANSCRIPT_NO_START_CODON,T|upstream_gene_variant|MODIFIER|OS01G0113650|OS01G0113650|transcript|OS01T0113650-00|protein_coding||c.-1132_-1123delGGCGTTTCTA|||||1112|,T|downstream_gene_variant|MODIFIER|OS01G0113500|OS01G0113500|transcript|OS01T0113500-01|pr…
chr01	737810	TC	T	820.36	0/0	0/0	0/0	0/0	1|1	0/0	0/0	./.	0/0	0/0	0/0	0/0	./.	0/0	0/0	0/0	0/0	0/0	0/0	0/0	0/0	0/0	0/0	0/0	T|5_prime_UTR_variant|MODIFIER|OS01G0113400|OS01G0113400|transcript|OS01T0113400-01|protein_coding|1/6|c.-238delG|||||437|WARNING_TRANSCRIPT_NO_START_CODON,T|upstream_gene_variant|MODIFIER|OS01G0113650|OS01G0113650|transcript|OS01T0113650-00|protein_coding||c.-1117delC|||||1097|,T|downstream_gene_variant|MODIFIER|OS01G0113500|OS01G0113500|transcript|OS01T0113500-01|protein_coding||c.*713delC|||||…
chr01	737848	A	ACC	2147.76	0/0	0/0	0/0	0/0	1|1	0/0	0/0	1|1	0/0	0/0	0/0	0/0	1|1	0/0	0/0	0/0	0/0	0/0	0/0	0/0	0/0	0/0	0/0	0/0	ACC|5_prime_UTR_variant|MODIFIER|OS01G0113400|OS01G0113400|transcript|OS01T0113400-01|protein_coding|1/6|c.-277_-276dupGG|||||475|WARNING_TRANSCRIPT_NO_START_CODON,ACC|upstream_gene_variant|MODIFIER|OS01G0113650|OS01G0113650|transcript|OS01T0113650-00|protein_coding||c.-1080_-1079insCC|||||1059|,ACC|downstream_gene_variant|MODIFIER|OS01G0113500|OS01G0113500|transcript|OS01T0113500-01|protein_codi…
chr01	737864	AGAGCCAGGGCAGCCACGCGCAGTGGCGCTGG	A	2733.73	0/0	0/0	0/0	0/0	1|1	0/0	0/0	1|1	0/0	0/0	0/0	0/0	1|1	0/0	0/0	0/0	0/0	0/0	0/0	0/0	0/0	0/0	0/0	0/0	A|5_prime_UTR_variant|MODIFIER|OS01G0113400|OS01G0113400|transcript|OS01T0113400-01|protein_coding|1/6|c.-322_-292delCCAGCGCCACTGCGCGTGGCTGCCCTGGCTC|||||491|WARNING_TRANSCRIPT_NO_START_CODON,A|upstream_gene_variant|MODIFIER|OS01G0113650|OS01G0113650|transcript|OS01T0113650-00|protein_coding||c.-1063_-1033delGAGCCAGGGCAGCCACGCGCAGTGGCGCTGG|||||1043|,A|downstream_gene_variant|MODIFIER|OS01G0113500|…
chr01	737914	G	GATTCAGGCC	3000.77	0/0	0/0	0/0	0/0	1|1	0/0	0/0	1|1	0/0	0/0	0/0	0/0	1|1	0/0	0/0	0/0	0/0	0/0	0/0	0/0	0/0	0/0	0/0	0/0	GATTCAGGCC|5_prime_UTR_variant|MODIFIER|OS01G0113400|OS01G0113400|transcript|OS01T0113400-01|protein_coding|1/6|c.-342_-341insGGCCTGAAT|||||541|WARNING_TRANSCRIPT_NO_START_CODON,GATTCAGGCC|upstream_gene_variant|MODIFIER|OS01G0113650|OS01G0113650|transcript|OS01T0113650-00|protein_coding||c.-1014_-1013insATTCAGGCC|||||993|,GATTCAGGCC|downstream_gene_variant|MODIFIER|OS01G0113500|OS01G0113500|trans…
chr01	738046	CATTCAATGTT	C	2869.73	0/0	0/0	0/0	0/0	1|1	0/0	0/0	1|1	0/0	0/0	0/0	0/0	1|1	0/0	0/0	0/0	0/0	0/0	0/0	0/0	0/0	0/0	0/0	0/0	C|upstream_gene_variant|MODIFIER|OS01G0113400|OS01G0113400|transcript|OS01T0113400-01|protein_coding||c.-682_-673delAACATTGAAT|||||27|WARNING_TRANSCRIPT_NO_START_CODON,C|upstream_gene_variant|MODIFIER|OS01G0113650|OS01G0113650|transcript|OS01T0113650-00|protein_coding||c.-881_-872delATTCAATGTT|||||861|,C|downstream_gene_variant|MODIFIER|OS01G0113500|OS01G0113500|transcript|OS01T0113500-01|protein…
chr01	738079	A	ATT	1474.46	0/0	0/0	0/0	0/0	1|1	0/0	0/0	1|1	0/0	0/0	0/0	0/0	1|1	0/0	0/0	0/0	0/0	0/0	0/0	0/0	0/0	0/0	0/0	0/0	ATT|upstream_gene_variant|MODIFIER|OS01G0113400|OS01G0113400|transcript|OS01T0113400-01|protein_coding||c.-706_-705insAA|||||60|WARNING_TRANSCRIPT_NO_START_CODON,ATT|upstream_gene_variant|MODIFIER|OS01G0113650|OS01G0113650|transcript|OS01T0113650-00|protein_coding||c.-849_-848insTT|||||828|,ATT|downstream_gene_variant|MODIFIER|OS01G0113500|OS01G0113500|transcript|OS01T0113500-01|protein_coding||c…
chr01	738080	GGCAA	G	1429.42	0/0	0/0	0/0	0/0	1|1	0/0	0/0	1|1	0/0	0/0	0/0	0/0	1|1	0/0	0/0	0/0	0/0	0/0	0/0	0/0	0/0	0/0	0/0	0/0	G|upstream_gene_variant|MODIFIER|OS01G0113400|OS01G0113400|transcript|OS01T0113400-01|protein_coding||c.-710_-707delTTGC|||||61|WARNING_TRANSCRIPT_NO_START_CODON,G|upstream_gene_variant|MODIFIER|OS01G0113650|OS01G0113650|transcript|OS01T0113650-00|protein_coding||c.-847_-844delGCAA|||||827|,G|downstream_gene_variant|MODIFIER|OS01G0113500|OS01G0113500|transcript|OS01T0113500-01|protein_coding||c.*…
chr01	738305	T	TGAATGAACTCAGC	7128.77	0/0	0/0	0/0	0/0	1|1	0/0	0/0	1|1	0/0	0/0	0/0	0/0	1|1	0/0	0/0	0/0	0/0	0/0	0/0	0/0	0/0	0/0	0/0	0/0	TGAATGAACTCAGC|3_prime_UTR_variant|MODIFIER|OS01G0113600|OS01G0113600|transcript|OS01T0113600-01|protein_coding|3/3|c.*248_*249insGCTGAGTTCATTC|||||2202|,TGAATGAACTCAGC|upstream_gene_variant|MODIFIER|OS01G0113400|OS01G0113400|transcript|OS01T0113400-01|protein_coding||c.-932_-931insGCTGAGTTCATTC|||||286|WARNING_TRANSCRIPT_NO_START_CODON,TGAATGAACTCAGC|upstream_gene_variant|MODIFIER|OS01G0113650|O…
chr01	738357	C	CAA	6409.77	0/0	0/0	0/0	0/0	1|1	0/0	0/0	1|1	0/0	0/0	0/0	0/0	1|1	0/0	0/0	0/0	0/0	0/0	0/0	0/0	0/0	0/0	0/0	0/0	CAA|3_prime_UTR_variant|MODIFIER|OS01G0113600|OS01G0113600|transcript|OS01T0113600-01|protein_coding|3/3|c.*195_*196dupTT|||||2150|,CAA|upstream_gene_variant|MODIFIER|OS01G0113400|OS01G0113400|transcript|OS01T0113400-01|protein_coding||c.-985_-984dupTT|||||338|WARNING_TRANSCRIPT_NO_START_CODON,CAA|upstream_gene_variant|MODIFIER|OS01G0113650|OS01G0113650|transcript|OS01T0113650-00|protein_coding||…
chr01	738444	CCTGCA	C	7311.73	0/0	0/0	0/0	0/0	1/1	0/0	0/0	1/1	0/0	0/0	0/0	0/0	1/1	0/0	0/0	0/0	0/0	0/0	0/0	0/0	0/0	0/0	0/0	0/0	C|3_prime_UTR_variant|MODIFIER|OS01G0113600|OS01G0113600|transcript|OS01T0113600-01|protein_coding|3/3|c.*105_*109delTGCAG|||||2059|,C|upstream_gene_variant|MODIFIER|OS01G0113400|OS01G0113400|transcript|OS01T0113400-01|protein_coding||c.-1075_-1071delTGCAG|||||425|WARNING_TRANSCRIPT_NO_START_CODON,C|upstream_gene_variant|MODIFIER|OS01G0113650|OS01G0113650|transcript|OS01T0113650-00|protein_coding…
chr01	738601	AAG	A	6607.73	0/0	0/0	0/0	0/0	1/1	0/0	0/0	1/1	0/0	0/0	0/0	0/0	1/1	0/0	0/0	0/0	0/0	0/0	0/0	0/0	0/0	0/0	0/0	0/0	A|upstream_gene_variant|MODIFIER|OS01G0113400|OS01G0113400|transcript|OS01T0113400-01|protein_coding||c.-1229_-1228delCT|||||582|WARNING_TRANSCRIPT_NO_START_CODON,A|upstream_gene_variant|MODIFIER|OS01G0113650|OS01G0113650|transcript|OS01T0113650-00|protein_coding||c.-326_-325delAG|||||306|,A|downstream_gene_variant|MODIFIER|OS01G0113500|OS01G0113500|transcript|OS01T0113500-01|protein_coding||c.*1…
chr01	738880	CCTT	C	8729.73	0/0	0/0	0/0	0/0	1/1	0/0	0/0	1/1	0/0	0/0	0/0	0/0	1/1	0/0	0/0	0/0	0/0	0/0	0/0	0/0	0/0	0/0	0/0	0/0	C|3_prime_UTR_variant|MODIFIER|OS01G0113600|OS01G0113600|transcript|OS01T0113600-02|protein_coding|2/2|c.*1625_*1627delAAG|||||1625|,C|upstream_gene_variant|MODIFIER|OS01G0113400|OS01G0113400|transcript|OS01T0113400-01|protein_coding||c.-1509_-1507delAAG|||||861|WARNING_TRANSCRIPT_NO_START_CODON,C|upstream_gene_variant|MODIFIER|OS01G0113650|OS01G0113650|transcript|OS01T0113650-00|protein_coding||…
chr01	742237	AGTAAGAATTTTTATTTTTTTGTTTTTTTTTTTTTT	A	5177.73	0/0	0/0	0/0	0/0	1|1	0/0	0/0	1|1	0/0	0/0	0/0	0/0	1|1	0/0	0/0	0/0	0/0	0/0	0/0	0/0	0/0	0/0	0/0	0/0	A|upstream_gene_variant|MODIFIER|OS01G0113600|OS01G0113600|transcript|OS01T0113600-01|protein_coding||c.-620_-586delAAAAAAAAAAAAAACAAAAAAATAAAAATTCTTAC|||||441|,A|upstream_gene_variant|MODIFIER|OS01G0113750|OS01G0113750|transcript|OS01T0113750-00|lincRNA||n.-645_-611delGTAAGAATTTTTATTTTTTTGTTTTTTTTTTTTTT|||||645|,A|upstream_gene_variant|MODIFIER|OS01G0113600|OS01G0113600|transcript|OS01T0113600-0…
chr01	742274	CGGGG	C	4958.73	0/0	0/0	0/0	0/0	1|1	0/0	0/0	1|1	0/0	0/0	0/0	0/0	1|1	0/0	0/0	0/0	0/0	0/0	0/0	0/0	0/0	0/0	0/0	0/0	C|upstream_gene_variant|MODIFIER|OS01G0113600|OS01G0113600|transcript|OS01T0113600-01|protein_coding||c.-626_-623delCCCC|||||478|,C|upstream_gene_variant|MODIFIER|OS01G0113750|OS01G0113750|transcript|OS01T0113750-00|lincRNA||n.-608_-605delGGGG|||||608|,C|upstream_gene_variant|MODIFIER|OS01G0113600|OS01G0113600|transcript|OS01T0113600-02|protein_coding||c.-626_-623delCCCC|||||512|,C|downstream_gen…
chr01	742817	C	CTGTTTACAACAATATGTAG	9138.77	0/0	0/0	0/0	0/0	1/1	0/0	0/0	1/1	0/0	0/0	0/0	0/0	1/1	0/0	0/0	0/0	0/0	0/0	0/0	0/0	0/0	0/0	0/0	0/0	CTGTTTACAACAATATGTAG|upstream_gene_variant|MODIFIER|OS01G0113600|OS01G0113600|transcript|OS01T0113600-01|protein_coding||c.-1166_-1165insCTACATATTGTTGTAAACA|||||1021|,CTGTTTACAACAATATGTAG|upstream_gene_variant|MODIFIER|OS01G0113750|OS01G0113750|transcript|OS01T0113750-00|lincRNA||n.-66_-65insTGTTTACAACAATATGTAG|||||65|,CTGTTTACAACAATATGTAG|upstream_gene_variant|MODIFIER|OS01G0113600|OS01G0113600|…
chr01	744345	AAAAGAATGGCTT	A	7834.73	0/0	0/0	0/0	0/0	1|1	0/0	0/0	1|1	0/0	0/0	0/0	0/0	1|1	0/0	0/0	0/0	0/0	0/0	0/0	0/0	0/0	0/0	0/0	0/0	A|upstream_gene_variant|MODIFIER|OS01G0113800|OS01G0113800|transcript|OS01T0113800-01|protein_coding||c.-1236_-1225delAAAGAATGGCTT|||||1106|,A|intron_variant|MODIFIER|OS01G0113700|OS01G0113700|transcript|OS01T0113700-00|protein_coding|1/2|c.741-37_741-26delAAGCCATTCTTT||||||,A|intron_variant|MODIFIER|OS01G0113750|OS01G0113750|transcript|OS01T0113750-00|lincRNA|1/1|n.1308-36_1308-25delAAAGAATGGCTT…
chr01	744397	A	AGTTTATGTATGAATGC	8068.77	0/0	0/0	0/0	0/0	1|1	0/0	0/0	1|1	0/0	0/0	0/0	0/0	1|1	0/0	0/0	0/0	0/0	0/0	0/0	0/0	0/0	0/0	0/0	0/0	AGTTTATGTATGAATGC|upstream_gene_variant|MODIFIER|OS01G0113800|OS01G0113800|transcript|OS01T0113800-01|protein_coding||c.-1185_-1184insGTTTATGTATGAATGC|||||1054|,AGTTTATGTATGAATGC|intron_variant|MODIFIER|OS01G0113700|OS01G0113700|transcript|OS01T0113700-00|protein_coding|1/2|c.740+40_740+41insGCATTCATACATAAAC||||||,AGTTTATGTATGAATGC|non_coding_transcript_exon_variant|MODIFIER|OS01G0113750|OS01G011…
chr01	744400	T	TCTTGAAAAAGTG	7773.77	0/0	0/0	0/0	0/0	1|1	0/0	0/0	1|1	0/0	0/0	0/0	0/0	1|1	0/0	0/0	0/0	0/0	0/0	0/0	0/0	0/0	0/0	0/0	0/0	TCTTGAAAAAGTG|upstream_gene_variant|MODIFIER|OS01G0113800|OS01G0113800|transcript|OS01T0113800-01|protein_coding||c.-1182_-1181insCTTGAAAAAGTG|||||1051|,TCTTGAAAAAGTG|intron_variant|MODIFIER|OS01G0113700|OS01G0113700|transcript|OS01T0113700-00|protein_coding|1/2|c.740+37_740+38insCACTTTTTCAAG||||||,TCTTGAAAAAGTG|non_coding_transcript_exon_variant|MODIFIER|OS01G0113750|OS01G0113750|transcript|OS01…
chr01	744641	A	ACCC	7362.77	0/0	0/0	0/0	0/0	1|1	0/0	0/0	1|1	0/0	0/0	0/0	0/0	1|1	0/0	0/0	0/0	0/0	0/0	0/0	0/0	0/0	0/0	0/0	0/0	ACCC|disruptive_inframe_insertion|MODERATE|OS01G0113700|OS01G0113700|transcript|OS01T0113700-00|protein_coding|1/3|c.536_537insGGG|p.Val179_Phe180insGly|536/2079|536/2058|179/685||,ACCC|upstream_gene_variant|MODIFIER|OS01G0113800|OS01G0113800|transcript|OS01T0113800-01|protein_coding||c.-941_-940insCCC|||||810|,ACCC|non_coding_transcript_exon_variant|MODIFIER|OS01G0113750|OS01G0113750|transcript|…
chr01	744776	AGGTC	A	5679.81	0/0	0/0	0/0	0/0	./.	0/0	0/0	1|1	0/0	0/0	0/0	0/0	./.	0/0	0/0	0/0	0/0	0/0	0/0	0/0	0/0	0/0	0/0	0/0	A|frameshift_variant|HIGH|OS01G0113700|OS01G0113700|transcript|OS01T0113700-00|protein_coding|1/3|c.398_401delGACC|p.Gly133fs|401/2079|398/2058|133/685||,A|upstream_gene_variant|MODIFIER|OS01G0113800|OS01G0113800|transcript|OS01T0113800-01|protein_coding||c.-805_-802delGGTC|||||675|,A|non_coding_transcript_exon_variant|MODIFIER|OS01G0113750|OS01G0113750|transcript|OS01T0113750-00|lincRNA|2/2|n.17…
chr01	745633	A	ACCT	6496.77	0/0	0/0	0/0	0/0	1|1	0/0	0/0	1|1	0/0	0/0	0/0	0/0	1|1	0/0	0/0	0/0	0/0	0/0	0/0	0/0	0/0	0/0	0/0	0/0	ACCT|disruptive_inframe_insertion|MODERATE|OS01G0113800|OS01G0113800|transcript|OS01T0113800-01|protein_coding|1/3|c.52_53insCCT|p.Ser18delinsThrCys|183/2399|53/1893|18/630||,ACCT|upstream_gene_variant|MODIFIER|OS01G0113700|OS01G0113700|transcript|OS01T0113700-00|protein_coding||c.-457_-456insAGG|||||457|,ACCT|upstream_gene_variant|MODIFIER|EPlOSAG00000018449|EPlOSAG00000018449|transcript|EPlOSAT…
chr01	746210	A	ATGT	6315.77	0/0	0/0	0/0	0/0	1|1	0/0	0/0	1|1	0/0	0/0	0/0	0/0	1|1	0/0	0/0	0/0	0/0	0/0	0/0	0/0	0/0	0/0	0/0	0/0	ATGT|disruptive_inframe_insertion|MODERATE|OS01G0113800|OS01G0113800|transcript|OS01T0113800-01|protein_coding|1/3|c.629_630insTGT|p.Tyr210_Thr211insVal|760/2399|630/1893|210/630||,ATGT|upstream_gene_variant|MODIFIER|OS01G0113700|OS01G0113700|transcript|OS01T0113700-00|protein_coding||c.-1034_-1033insACA|||||1034|,ATGT|upstream_gene_variant|MODIFIER|EPlOSAG00000018449|EPlOSAG00000018449|transcrip…
chr01	746211	CACG	C	6315.73	0/0	0/0	0/0	0/0	1|1	0/0	0/0	1|1	0/0	0/0	0/0	0/0	1|1	0/0	0/0	0/0	0/0	0/0	0/0	0/0	0/0	0/0	0/0	0/0	C|conservative_inframe_deletion|MODERATE|OS01G0113800|OS01G0113800|transcript|OS01T0113800-01|protein_coding|1/3|c.631_633delACG|p.Thr211del|761/2399|631/1893|211/630||,C|upstream_gene_variant|MODIFIER|OS01G0113700|OS01G0113700|transcript|OS01T0113700-00|protein_coding||c.-1037_-1035delCGT|||||1035|,C|upstream_gene_variant|MODIFIER|EPlOSAG00000018449|EPlOSAG00000018449|transcript|EPlOSAT000000198…
chr01	746492	TG	T	2902.73	0/0	0/0	0/0	0/0	1|1	0/0	0/0	1|1	0/0	0/0	0/0	0/0	1|1	0/0	0/0	0/0	0/0	0/0	0/0	0/0	0/0	0/0	0/0	0/0	T|upstream_gene_variant|MODIFIER|OS01G0113700|OS01G0113700|transcript|OS01T0113700-00|protein_coding||c.-1316delC|||||1316|,T|upstream_gene_variant|MODIFIER|EPlOSAG00000018449|EPlOSAG00000018449|transcript|EPlOSAT00000019837|lincRNA||n.-569delG|||||569|,T|downstream_gene_variant|MODIFIER|OS01G0113750|OS01G0113750|transcript|OS01T0113750-00|lincRNA||n.*1328delG|||||1328|,T|intron_variant|MODIFIER|…
chr01	746495	G	GA	3088.77	0/0	0/0	0/0	0/0	1|1	0/0	0/0	1|1	0/0	0/0	0/0	0/0	1|1	0/0	0/0	0/0	0/0	0/0	0/0	0/0	0/0	0/0	0/0	0/0	GA|upstream_gene_variant|MODIFIER|OS01G0113700|OS01G0113700|transcript|OS01T0113700-00|protein_coding||c.-1319_-1318insT|||||1319|,GA|upstream_gene_variant|MODIFIER|EPlOSAG00000018449|EPlOSAG00000018449|transcript|EPlOSAT00000019837|lincRNA||n.-567_-566insA|||||566|,GA|downstream_gene_variant|MODIFIER|OS01G0113750|OS01G0113750|transcript|OS01T0113750-00|lincRNA||n.*1330_*1331insA|||||1331|,GA|int…
chr01	746593	AG	A	4532.73	0/0	0/0	0/0	0/0	1|1	0/0	0/0	1|1	0/0	0/0	0/0	0/0	1|1	0/0	0/0	0/0	0/0	0/0	0/0	0/0	0/0	0/0	0/0	0/0	A|upstream_gene_variant|MODIFIER|OS01G0113700|OS01G0113700|transcript|OS01T0113700-00|protein_coding||c.-1417delC|||||1417|,A|upstream_gene_variant|MODIFIER|EPlOSAG00000018449|EPlOSAG00000018449|transcript|EPlOSAT00000019837|lincRNA||n.-468delG|||||468|,A|downstream_gene_variant|MODIFIER|OS01G0113750|OS01G0113750|transcript|OS01T0113750-00|lincRNA||n.*1429delG|||||1429|,A|intron_variant|MODIFIER|…
chr01	746730	G	GTTACT	4172.77	0/0	0/0	0/0	0/0	1|1	0/0	0/0	1|1	0/0	0/0	0/0	0/0	1|1	0/0	0/0	0/0	0/0	0/0	0/0	0/0	0/0	0/0	0/0	0/0	GTTACT|upstream_gene_variant|MODIFIER|OS01G0113700|OS01G0113700|transcript|OS01T0113700-00|protein_coding||c.-1554_-1553insAGTAA|||||1554|,GTTACT|upstream_gene_variant|MODIFIER|EPlOSAG00000018449|EPlOSAG00000018449|transcript|EPlOSAT00000019837|lincRNA||n.-332_-331insTTACT|||||331|,GTTACT|downstream_gene_variant|MODIFIER|OS01G0113750|OS01G0113750|transcript|OS01T0113750-00|lincRNA||n.*1565_*1566i…
chr01	746793	CA	C	4969.73	0/0	0/0	0/0	0/0	1|1	0/0	0/0	1|1	0/0	0/0	0/0	0/0	1/1	0/0	0/0	0/0	0/0	0/0	0/0	0/0	0/0	0/0	0/0	0/0	C|upstream_gene_variant|MODIFIER|OS01G0113700|OS01G0113700|transcript|OS01T0113700-00|protein_coding||c.-1617delT|||||1617|,C|upstream_gene_variant|MODIFIER|EPlOSAG00000018449|EPlOSAG00000018449|transcript|EPlOSAT00000019837|lincRNA||n.-268delA|||||268|,C|downstream_gene_variant|MODIFIER|OS01G0113750|OS01G0113750|transcript|OS01T0113750-00|lincRNA||n.*1629delA|||||1629|,C|intron_variant|MODIFIER|…
chr01	747471	A	ATT	989.91	0/0	0/0	0/0	0/0	1|1	0/0	0/0	1/1	0/0	0/0	0/0	0/0	1/1	0/0	0/0	0/0	0/0	0/0	0/0	0/0	0/0	0/0	0/0	0/0	ATT|downstream_gene_variant|MODIFIER|EPlOSAG00000018449|EPlOSAG00000018449|transcript|EPlOSAT00000019837|lincRNA||n.*254_*255insTT|||||255|,ATT|intron_variant|MODIFIER|OS01G0113800|OS01G0113800|transcript|OS01T0113800-01|protein_coding|2/2|c.824-29_824-28insTT||||||
chr01	747479	G	GAT	532.37	0/0	0/0	0/0	0/0	1|1	0/0	0/0	./.	0/0	0/0	0/0	0/0	1/1	0/0	0/0	0/0	0/0	0/0	0/0	0/0	0/0	0/0	0/0	0/0	GAT|downstream_gene_variant|MODIFIER|EPlOSAG00000018449|EPlOSAG00000018449|transcript|EPlOSAT00000019837|lincRNA||n.*262_*263insAT|||||263|,GAT|intron_variant|MODIFIER|OS01G0113800|OS01G0113800|transcript|OS01T0113800-01|protein_coding|2/2|c.824-21_824-20insAT||||||
chr01	748697	G	GATC	8843.77	0/0	0/0	0/0	0/0	1/1	0/0	0/0	1/1	0/0	0/0	0/0	0/0	1/1	0/0	0/0	0/0	0/0	0/0	0/0	0/0	0/0	0/0	0/0	0/0	GATC|3_prime_UTR_variant|MODIFIER|OS01G0113800|OS01G0113800|transcript|OS01T0113800-01|protein_coding|3/3|c.*130_*132dupTCA|||||133|INFO_REALIGN_3_PRIME,GATC|downstream_gene_variant|MODIFIER|EPlOSAG00000018449|EPlOSAG00000018449|transcript|EPlOSAT00000019837|lincRNA||n.*1480_*1481insATC|||||1481|
chr01	748836	C	CTTA	7245.77	0/0	0/0	0/0	0/0	1/1	0/0	0/0	1/1	0/0	0/0	0/0	0/0	1/1	0/0	0/0	0/0	0/0	0/0	0/0	0/0	0/0	0/0	0/0	0/0	CTTA|3_prime_UTR_variant|MODIFIER|OS01G0113800|OS01G0113800|transcript|OS01T0113800-01|protein_coding|3/3|c.*270_*272dupATT|||||273|INFO_REALIGN_3_PRIME,CTTA|downstream_gene_variant|MODIFIER|EPlOSAG00000018449|EPlOSAG00000018449|transcript|EPlOSAT00000019837|lincRNA||n.*1619_*1620insTTA|||||1620|
chr01	749137	GGCAATCAACCGTGCCATACT	G	6385.73	0/0	0/0	0/0	0/0	1/1	0/0	0/0	1/1	0/0	0/0	0/0	0/0	1/1	0/0	0/0	0/0	0/0	0/0	0/0	0/0	0/0	0/0	0/0	0/0	G|downstream_gene_variant|MODIFIER|OS01G0113800|OS01G0113800|transcript|OS01T0113800-01|protein_coding||c.*569_*588delGCAATCAACCGTGCCATACT|||||193|,G|downstream_gene_variant|MODIFIER|EPlOSAG00000018449|EPlOSAG00000018449|transcript|EPlOSAT00000019837|lincRNA||n.*1921_*1940delGCAATCAACCGTGCCATACT|||||1921|,G|intergenic_region|MODIFIER|OS01G0113800-OS01G0113900|OS01G0113800-OS01G0113900|intergenic_…
chr01	749214	A	AAGTAT	7062.77	0/0	0/0	0/0	0/0	1|1	0/0	0/0	1|1	0/0	0/0	0/0	0/0	1|1	0/0	0/0	0/0	0/0	0/0	0/0	0/0	0/0	0/0	0/0	0/0	AAGTAT|downstream_gene_variant|MODIFIER|OS01G0113800|OS01G0113800|transcript|OS01T0113800-01|protein_coding||c.*645_*646insAGTAT|||||270|,AAGTAT|downstream_gene_variant|MODIFIER|EPlOSAG00000018449|EPlOSAG00000018449|transcript|EPlOSAT00000019837|lincRNA||n.*1997_*1998insAGTAT|||||1998|,AAGTAT|intergenic_region|MODIFIER|OS01G0113800-OS01G0113900|OS01G0113800-OS01G0113900|intergenic_region|OS01G011…
chr01	749456	AATG	A	4616.73	0/0	0/0	0/0	0/0	1/1	0/0	0/0	1/1	0/0	0/0	0/0	0/0	1/1	0/0	0/0	0/0	0/0	0/0	0/0	0/0	0/0	0/0	0/0	0/0	A|downstream_gene_variant|MODIFIER|OS01G0113800|OS01G0113800|transcript|OS01T0113800-01|protein_coding||c.*888_*890delATG|||||512|,A|intergenic_region|MODIFIER|OS01G0113800-OS01G0113900|OS01G0113800-OS01G0113900|intergenic_region|OS01G0113800-OS01G0113900|||n.749457_749459delATG||||||
chr01	749499	G	GCGCCGCCGC	2997.77	0/0	0/0	0/0	0/0	1/1	0/0	0/0	1/1	0/0	0/0	0/0	0/0	1/1	0/0	0/0	0/0	0/0	0/0	0/0	0/0	0/0	0/0	0/0	0/0	GCGCCGCCGC|downstream_gene_variant|MODIFIER|OS01G0113800|OS01G0113800|transcript|OS01T0113800-01|protein_coding||c.*930_*931insCGCCGCCGC|||||555|,GCGCCGCCGC|intergenic_region|MODIFIER|OS01G0113800-OS01G0113900|OS01G0113800-OS01G0113900|intergenic_region|OS01G0113800-OS01G0113900|||n.749499_749500insCGCCGCCGC||||||
chr01	749770	ATGGAGG	A	2784.73	0/0	0/0	0/0	0/0	1|1	0/0	0/0	1|1	0/0	0/0	0/0	0/0	1|1	0/0	0/0	0/0	0/0	0/0	0/0	0/0	0/0	0/0	0/0	0/0	A|downstream_gene_variant|MODIFIER|OS01G0113800|OS01G0113800|transcript|OS01T0113800-01|protein_coding||c.*1202_*1207delTGGAGG|||||826|,A|intergenic_region|MODIFIER|OS01G0113800-OS01G0113900|OS01G0113800-OS01G0113900|intergenic_region|OS01G0113800-OS01G0113900|||n.749771_749776delTGGAGG||||||
chr01	749777	C	CAT	2784.77	0/0	0/0	0/0	0/0	1|1	0/0	0/0	1|1	0/0	0/0	0/0	0/0	1|1	0/0	0/0	0/0	0/0	0/0	0/0	0/0	0/0	0/0	0/0	0/0	CAT|downstream_gene_variant|MODIFIER|OS01G0113800|OS01G0113800|transcript|OS01T0113800-01|protein_coding||c.*1208_*1209insAT|||||833|,CAT|intergenic_region|MODIFIER|OS01G0113800-OS01G0113900|OS01G0113800-OS01G0113900|intergenic_region|OS01G0113800-OS01G0113900|||n.749777_749778insAT||||||
chr01	750107	A	ACAAAAACTCCTAT	9078.77	0/0	0/0	0/0	0/0	1|1	0/0	0/0	1|1	0/0	0/0	0/0	0/0	1|1	0/0	0/0	0/0	0/0	0/0	0/0	0/0	0/0	0/0	0/0	0/0	ACAAAAACTCCTAT|downstream_gene_variant|MODIFIER|OS01G0113800|OS01G0113800|transcript|OS01T0113800-01|protein_coding||c.*1538_*1539insCAAAAACTCCTAT|||||1163|,ACAAAAACTCCTAT|downstream_gene_variant|MODIFIER|OS01G0113900|OS01G0113900|transcript|OS01T0113900-01|protein_coding||c.*2839_*2840insATAGGAGTTTTTG|||||1972|,ACAAAAACTCCTAT|intergenic_region|MODIFIER|OS01G0113800-OS01G0113900|OS01G0113800-OS01…
chr01	750151	T	TTCTCTGTTCA	9563.77	0/0	0/0	0/0	0/0	1|1	0/0	0/0	1|1	0/0	0/0	0/0	0/0	1|1	0/0	0/0	0/0	0/0	0/0	0/0	0/0	0/0	0/0	0/0	0/0	TTCTCTGTTCA|downstream_gene_variant|MODIFIER|OS01G0113800|OS01G0113800|transcript|OS01T0113800-01|protein_coding||c.*1582_*1583insTCTCTGTTCA|||||1207|,TTCTCTGTTCA|downstream_gene_variant|MODIFIER|OS01G0113900|OS01G0113900|transcript|OS01T0113900-01|protein_coding||c.*2795_*2796insTGAACAGAGA|||||1928|,TTCTCTGTTCA|intergenic_region|MODIFIER|OS01G0113800-OS01G0113900|OS01G0113800-OS01G0113900|interg…
chr01	750378	A	AGGG	8718.77	0/0	0/0	0/0	0/0	1|1	0/0	0/0	1|1	0/0	0/0	0/0	0/0	1|1	0/0	0/0	0/0	0/0	0/0	0/0	0/0	0/0	0/0	0/0	0/0	AGGG|upstream_gene_variant|MODIFIER|OS01G0113950|OS01G0113950|transcript|OS01T0113950-00|protein_coding||c.-4027_-4026insGGG|||||1810|,AGGG|downstream_gene_variant|MODIFIER|OS01G0113800|OS01G0113800|transcript|OS01T0113800-01|protein_coding||c.*1809_*1810insGGG|||||1434|,AGGG|downstream_gene_variant|MODIFIER|OS01G0113900|OS01G0113900|transcript|OS01T0113900-01|protein_coding||c.*2568_*2569insCCC|…
chr01	750380	G	GAAAAGC	9168.77	0/0	0/0	0/0	0/0	1|1	0/0	0/0	1|1	0/0	0/0	0/0	0/0	1|1	0/0	0/0	0/0	0/0	0/0	0/0	0/0	0/0	0/0	0/0	0/0	GAAAAGC|upstream_gene_variant|MODIFIER|OS01G0113950|OS01G0113950|transcript|OS01T0113950-00|protein_coding||c.-4025_-4024insAAAAGC|||||1808|,GAAAAGC|downstream_gene_variant|MODIFIER|OS01G0113800|OS01G0113800|transcript|OS01T0113800-01|protein_coding||c.*1811_*1812insAAAAGC|||||1436|,GAAAAGC|downstream_gene_variant|MODIFIER|OS01G0113900|OS01G0113900|transcript|OS01T0113900-01|protein_coding||c.*25…
chr01	750383	T	TCGCAAG	8583.77	0/0	0/0	0/0	0/0	1|1	0/0	0/0	1|1	0/0	0/0	0/0	0/0	1|1	0/0	0/0	0/0	0/0	0/0	0/0	0/0	0/0	0/0	0/0	0/0	TCGCAAG|upstream_gene_variant|MODIFIER|OS01G0113950|OS01G0113950|transcript|OS01T0113950-00|protein_coding||c.-4022_-4021insCGCAAG|||||1805|,TCGCAAG|downstream_gene_variant|MODIFIER|OS01G0113800|OS01G0113800|transcript|OS01T0113800-01|protein_coding||c.*1814_*1815insCGCAAG|||||1439|,TCGCAAG|downstream_gene_variant|MODIFIER|OS01G0113900|OS01G0113900|transcript|OS01T0113900-01|protein_coding||c.*25…
chr01	750501	CAAATCG	C	4593.73	0/0	0/0	0/0	0/0	1/1	0/0	0/0	1/1	0/0	0/0	0/0	0/0	1/1	0/0	0/0	0/0	0/0	0/0	0/0	0/0	0/0	0/0	0/0	0/0	C|upstream_gene_variant|MODIFIER|OS01G0113950|OS01G0113950|transcript|OS01T0113950-00|protein_coding||c.-3903_-3898delAAATCG|||||1687|,C|downstream_gene_variant|MODIFIER|OS01G0113800|OS01G0113800|transcript|OS01T0113800-01|protein_coding||c.*1933_*1938delAAATCG|||||1557|,C|downstream_gene_variant|MODIFIER|OS01G0113900|OS01G0113900|transcript|OS01T0113900-01|protein_coding||c.*2440_*2445delCGATTT|…
chr01	750599	G	GCA	4252.77	0/0	0/0	0/0	0/0	1/1	0/0	0/0	1/1	0/0	0/0	0/0	0/0	1/1	0/0	0/0	0/0	0/0	0/0	0/0	0/0	0/0	0/0	0/0	0/0	GCA|upstream_gene_variant|MODIFIER|OS01G0113950|OS01G0113950|transcript|OS01T0113950-00|protein_coding||c.-3806_-3805insCA|||||1589|,GCA|downstream_gene_variant|MODIFIER|OS01G0113800|OS01G0113800|transcript|OS01T0113800-01|protein_coding||c.*2030_*2031insCA|||||1655|,GCA|downstream_gene_variant|MODIFIER|OS01G0113900|OS01G0113900|transcript|OS01T0113900-01|protein_coding||c.*2347_*2348insTG|||||14…
chr01	762646	CAT	C	786.37	0/0	0/0	0/0	0/0	./.	./.	0/0	./.	0/0	1/1	0/0	0/0	./.	0/0	0/0	0/0	0/0	0/0	0/0	1|1	0/0	0/0	0/0	0/0	C|downstream_gene_variant|MODIFIER|OS01G0114050|OS01G0114050|transcript|OS01T0114050-00|lincRNA||n.*1891_*1892delAT|||||1891|,C|intergenic_region|MODIFIER|OS01G0114050-EPlOSAG00000019427|OS01G0114050-EPlOSAG00000019427|intergenic_region|OS01G0114050-EPlOSAG00000019427|||n.762647_762648delAT||||||
chr01	792407	C	CGT	2379.76	0/0	0/0	0/0	0/0	1|1	0/0	0/0	1|1	0/0	0/0	0/0	0/0	1|1	0/0	0/0	0/0	0/0	0/0	0/0	0/0	0/0	0/0	0/0	0/0	CGT|frameshift_variant|HIGH|OS01G0114700|OS01G0114700|transcript|OS01T0114700-00|protein_coding|3/3|c.1880_1881insGT|p.Ter628fs|1936/1963|1881/1884|627/627||WARNING_TRANSCRIPT_NO_START_CODON,CGT|downstream_gene_variant|MODIFIER|OS01G0114800|OS01G0114800|transcript|OS01T0114800-01|protein_coding||c.*680_*681insAC|||||47|WARNING_TRANSCRIPT_NO_START_CODON
chr01	811364	C	CT	610.12	0/0	0/0	0/0	0/0	./.	0/0	1/1	./.	0/0	0/0	0/0	0/0	./.	0/0	0/0	0/0	0/0	0/0	0/0	0/0	0/0	0/0	0/0	0/0	CT|upstream_gene_variant|MODIFIER|OS01G0115300|OS01G0115300|transcript|OS01T0115300-01|protein_coding||c.-2065_-2064insA|||||1226|,CT|downstream_gene_variant|MODIFIER|EPlOSAG00000019841|EPlOSAG00000019841|transcript|EPlOSAT00000021229|lincRNA||n.*357_*358insA|||||357|,CT|intergenic_region|MODIFIER|OS01G0115300-EPlOSAG00000019841|OS01G0115300-EPlOSAG00000019841|intergenic_region|OS01G0115300-EPlOS…
chr01	840730	CTCCGA	C	6809.73	0/0	0/0	0/0	0/0	1|1	0/0	0/0	1|1	0/0	0/0	0/0	0/0	1|1	0/0	0/0	0/0	0/0	0/0	0/0	0/0	0/0	0/0	0/0	0/0	C|frameshift_variant|HIGH|OS01G0115500|OS01G0115500|transcript|OS01T0115500-00|protein_coding|1/1|c.94_98delTCGGA|p.Ser32fs|98/1020|94/1020|32/339||WARNING_TRANSCRIPT_NO_START_CODON,C|downstream_gene_variant|MODIFIER|OS01G0115566|OS01G0115566|transcript|OS01T0115566-00|protein_coding||c.*1267_*1271delTCGGA|||||1271|,C|non_coding_transcript_exon_variant|MODIFIER|OS01G0115533|OS01G0115533|transcrip…
chr01	841445	TA	T	5478.73	0/0	0/0	0/0	0/0	1|1	0/0	0/0	1|1	0/0	0/0	0/0	0/0	1|1	0/0	0/0	0/0	0/0	0/0	0/0	0/0	0/0	0/0	0/0	0/0	T|upstream_gene_variant|MODIFIER|OS01G0115500|OS01G0115500|transcript|OS01T0115500-00|protein_coding||c.-618delT|||||618|WARNING_TRANSCRIPT_NO_START_CODON,T|downstream_gene_variant|MODIFIER|OS01G0115566|OS01G0115566|transcript|OS01T0115566-00|protein_coding||c.*556delT|||||556|,T|intron_variant|MODIFIER|OS01G0115533|OS01G0115533|transcript|OS01T0115533-00|lincRNA|1/1|n.1268+300delA||||||
chr01	841552	C	CA	684.41	0/0	0/0	0/0	0/0	./.	0/0	0/0	1|1	0/0	0/0	0/0	0/0	./.	0/0	0/0	0/0	0/0	0/0	0/0	0/0	0/0	0/0	0/0	0/0	CA|upstream_gene_variant|MODIFIER|OS01G0115500|OS01G0115500|transcript|OS01T0115500-00|protein_coding||c.-725_-724insT|||||725|WARNING_TRANSCRIPT_NO_START_CODON,CA|upstream_gene_variant|MODIFIER|OS01G0115600|OS01G0115600|transcript|OS01T0115600-01|protein_coding||c.-1991_-1990insA|||||1977|,CA|downstream_gene_variant|MODIFIER|OS01G0115566|OS01G0115566|transcript|OS01T0115566-00|protein_coding||c.…
chr01	841678	G	GATCATTCCTTTCAAAAAAAAAATAA	8391.77	0/0	0/0	0/0	0/0	1|1	0/0	0/0	1|1	0/0	0/0	0/0	0/0	1|1	0/0	0/0	0/0	0/0	0/0	0/0	0/0	0/0	0/0	0/0	0/0	GATCATTCCTTTCAAAAAAAAAATAA|upstream_gene_variant|MODIFIER|OS01G0115500|OS01G0115500|transcript|OS01T0115500-00|protein_coding||c.-851_-850insTTATTTTTTTTTTGAAAGGAATGAT|||||851|WARNING_TRANSCRIPT_NO_START_CODON,GATCATTCCTTTCAAAAAAAAAATAA|upstream_gene_variant|MODIFIER|OS01G0115600|OS01G0115600|transcript|OS01T0115600-01|protein_coding||c.-1865_-1864insATCATTCCTTTCAAAAAAAAAATAA|||||1851|,GATCATTCCTT…
chr01	841685	G	GAACTAGAATCTAA	8320.77	0/0	0/0	0/0	0/0	1|1	0/0	0/0	1|1	0/0	0/0	0/0	0/0	1|1	0/0	0/0	0/0	0/0	0/0	0/0	0/0	0/0	0/0	0/0	0/0	GAACTAGAATCTAA|upstream_gene_variant|MODIFIER|OS01G0115500|OS01G0115500|transcript|OS01T0115500-00|protein_coding||c.-858_-857insTTAGATTCTAGTT|||||858|WARNING_TRANSCRIPT_NO_START_CODON,GAACTAGAATCTAA|upstream_gene_variant|MODIFIER|OS01G0115600|OS01G0115600|transcript|OS01T0115600-01|protein_coding||c.-1858_-1857insAACTAGAATCTAA|||||1844|,GAACTAGAATCTAA|downstream_gene_variant|MODIFIER|OS01G011556…
chr01	842026	CT	C	6505.73	0/0	0/0	0/0	0/0	1|1	0/0	0/0	1|1	0/0	0/0	0/0	0/0	1|1	0/0	0/0	0/0	0/0	0/0	0/0	0/0	0/0	0/0	0/0	0/0	C|frameshift_variant|HIGH|OS01G0115566|OS01G0115566|transcript|OS01T0115566-00|protein_coding|1/1|c.731delA|p.Glu244fs|731/756|731/756|244/251||,C|upstream_gene_variant|MODIFIER|OS01G0115500|OS01G0115500|transcript|OS01T0115500-00|protein_coding||c.-1199delA|||||1199|WARNING_TRANSCRIPT_NO_START_CODON,C|upstream_gene_variant|MODIFIER|OS01G0115600|OS01G0115600|transcript|OS01T0115600-01|protein_cod…
chr01	842028	CCTTGAAAGAGTACGCAGCATCAA	C	6620.73	0/0	0/0	0/0	0/0	1|1	0/0	0/0	1|1	0/0	0/0	0/0	0/0	1|1	0/0	0/0	0/0	0/0	0/0	0/0	0/0	0/0	0/0	0/0	0/0	C|frameshift_variant|HIGH|OS01G0115566|OS01G0115566|transcript|OS01T0115566-00|protein_coding|1/1|c.707_729delTTGATGCTGCGTACTCTTTCAAG|p.Ile236fs|729/756|707/756|236/251||,C|upstream_gene_variant|MODIFIER|OS01G0115500|OS01G0115500|transcript|OS01T0115500-00|protein_coding||c.-1223_-1201delTTGATGCTGCGTACTCTTTCAAG|||||1201|WARNING_TRANSCRIPT_NO_START_CODON,C|upstream_gene_variant|MODIFIER|OS01G01156…
chr01	842198	T	TAAA	6255.77	0/0	0/0	0/0	0/0	1|1	0/0	0/0	1|1	0/0	0/0	0/0	0/0	1|1	0/0	0/0	0/0	0/0	0/0	0/0	0/0	0/0	0/0	0/0	0/0	TAAA|conservative_inframe_insertion|MODERATE|OS01G0115566|OS01G0115566|transcript|OS01T0115566-00|protein_coding|1/1|c.559_560insTTT|p.Cys186_Tyr187insPhe|559/756|559/756|187/251||,TAAA|upstream_gene_variant|MODIFIER|OS01G0115500|OS01G0115500|transcript|OS01T0115500-00|protein_coding||c.-1371_-1370insTTT|||||1371|WARNING_TRANSCRIPT_NO_START_CODON,TAAA|upstream_gene_variant|MODIFIER|OS01G0115600|O…
chr01	842278	CTCA	C	6543.73	0/0	0/0	0/0	0/0	1|1	0/0	0/0	1|1	0/0	0/0	0/0	0/0	1|1	0/0	0/0	0/0	0/0	0/0	0/0	0/0	0/0	0/0	0/0	0/0	C|disruptive_inframe_deletion|MODERATE|OS01G0115566|OS01G0115566|transcript|OS01T0115566-00|protein_coding|1/1|c.477_479delTGA|p.Asn159_Glu160delinsLys|479/756|477/756|159/251||,C|upstream_gene_variant|MODIFIER|OS01G0115500|OS01G0115500|transcript|OS01T0115500-00|protein_coding||c.-1453_-1451delTGA|||||1451|WARNING_TRANSCRIPT_NO_START_CODON,C|upstream_gene_variant|MODIFIER|OS01G0115600|OS01G01156…
chr01	842347	G	GAA	6836.77	0/0	0/0	0/0	0/0	1|1	0/0	0/0	1|1	0/0	0/0	0/0	0/0	1|1	0/0	0/0	0/0	0/0	0/0	0/0	0/0	0/0	0/0	0/0	0/0	GAA|frameshift_variant|HIGH|OS01G0115566|OS01G0115566|transcript|OS01T0115566-00|protein_coding|1/1|c.410_411insTT|p.Glu138fs|410/756|410/756|137/251||,GAA|upstream_gene_variant|MODIFIER|OS01G0115500|OS01G0115500|transcript|OS01T0115500-00|protein_coding||c.-1520_-1519insTT|||||1520|WARNING_TRANSCRIPT_NO_START_CODON,GAA|upstream_gene_variant|MODIFIER|OS01G0115600|OS01G0115600|transcript|OS01T0115…
chr01	842349	T	TA	6925.77	0/0	0/0	0/0	0/0	1|1	0/0	0/0	1|1	0/0	0/0	0/0	0/0	1|1	0/0	0/0	0/0	0/0	0/0	0/0	0/0	0/0	0/0	0/0	0/0	TA|frameshift_variant|HIGH|OS01G0115566|OS01G0115566|transcript|OS01T0115566-00|protein_coding|1/1|c.408dupT|p.Ile137fs|408/756|408/756|136/251||,TA|upstream_gene_variant|MODIFIER|OS01G0115500|OS01G0115500|transcript|OS01T0115500-00|protein_coding||c.-1522dupT|||||1522|WARNING_TRANSCRIPT_NO_START_CODON,TA|upstream_gene_variant|MODIFIER|OS01G0115600|OS01G0115600|transcript|OS01T0115600-01|protein_…
chr01	842363	CAACCA	C	6921.73	0/0	0/0	0/0	0/0	1|1	0/0	0/0	1|1	0/0	0/0	0/0	0/0	1|1	0/0	0/0	0/0	0/0	0/0	0/0	0/0	0/0	0/0	0/0	0/0	C|frameshift_variant|HIGH|OS01G0115566|OS01G0115566|transcript|OS01T0115566-00|protein_coding|1/1|c.390_394delTGGTT|p.Gly131fs|394/756|390/756|130/251||,C|upstream_gene_variant|MODIFIER|OS01G0115500|OS01G0115500|transcript|OS01T0115500-00|protein_coding||c.-1540_-1536delTGGTT|||||1536|WARNING_TRANSCRIPT_NO_START_CODON,C|upstream_gene_variant|MODIFIER|OS01G0115600|OS01G0115600|transcript|OS01T0115…
chr01	842370	TATTCA	T	6607.73	0/0	0/0	0/0	0/0	1|1	0/0	0/0	1|1	0/0	0/0	0/0	0/0	1|1	0/0	0/0	0/0	0/0	0/0	0/0	0/0	0/0	0/0	0/0	0/0	T|frameshift_variant|HIGH|OS01G0115566|OS01G0115566|transcript|OS01T0115566-00|protein_coding|1/1|c.383_387delTGAAT|p.Leu128fs|387/756|383/756|128/251||,T|upstream_gene_variant|MODIFIER|OS01G0115500|OS01G0115500|transcript|OS01T0115500-00|protein_coding||c.-1547_-1543delTGAAT|||||1543|WARNING_TRANSCRIPT_NO_START_CODON,T|upstream_gene_variant|MODIFIER|OS01G0115600|OS01G0115600|transcript|OS01T0115…
chr01	842387	G	GGACCAGTAAT	7582.77	0/0	0/0	0/0	0/0	1/1	0/0	0/0	1/1	0/0	0/0	0/0	0/0	1/1	0/0	0/0	0/0	0/0	0/0	0/0	0/0	0/0	0/0	0/0	0/0	GGACCAGTAAT|frameshift_variant|HIGH|OS01G0115566|OS01G0115566|transcript|OS01T0115566-00|protein_coding|1/1|c.370_371insATTACTGGTC|p.Pro124fs|370/756|370/756|124/251||,GGACCAGTAAT|upstream_gene_variant|MODIFIER|OS01G0115500|OS01G0115500|transcript|OS01T0115500-00|protein_coding||c.-1560_-1559insATTACTGGTC|||||1560|WARNING_TRANSCRIPT_NO_START_CODON,GGACCAGTAAT|upstream_gene_variant|MODIFIER|OS01G0…
chr01	843100	TTATCGAC	T	2218.7	0/0	0/0	0/0	0/0	1|1	0/0	0/0	1|1	0/0	0/0	0/0	0/0	1|1	0/0	0/0	0/0	0/0	0/0	0/0	0/0	0/0	0/0	0/0	0/0	T|upstream_gene_variant|MODIFIER|OS01G0115566|OS01G0115566|transcript|OS01T0115566-00|protein_coding||c.-350_-344delGTCGATA|||||344|,T|upstream_gene_variant|MODIFIER|OS01G0115600|OS01G0115600|transcript|OS01T0115600-01|protein_coding||c.-442_-436delTATCGAC|||||429|,T|downstream_gene_variant|MODIFIER|OS01G0115533|OS01G0115533|transcript|OS01T0115533-00|lincRNA||n.*358_*364delTATCGAC|||||358|,T|int…
chr01	845374	C	CT	2221.77	0/0	0/0	0/0	0/0	1/1	0/0	0/0	1/1	0/0	0/0	0/0	0/0	1/1	0/0	0/0	0/0	0/0	0/0	0/0	0/0	0/0	0/0	0/0	0/0	CT|intron_variant|MODIFIER|OS01G0115600|OS01G0115600|transcript|OS01T0115600-01|protein_coding|1/2|c.770-590_770-589insT||||||
chr01	847656	G	GAAAA	3955.37	0/0	0/0	0/0	0/0	1/1	0/0	0/0	1/1	0/0	0/0	0/0	0/0	1/1	0/0	0/0	0/0	0/0	0/0	0/0	0/0	0/0	0/0	0/0	0/0	GAAAA|downstream_gene_variant|MODIFIER|OS01G0115600|OS01G0115600|transcript|OS01T0115600-01|protein_coding||c.*382_*383insAAAA|||||258|,GAAAA|intergenic_region|MODIFIER|OS01G0115600-OS01G0115700|OS01G0115600-OS01G0115700|intergenic_region|OS01G0115600-OS01G0115700|||n.847656_847657insAAAA||||||
chr01	847981	G	GGGCGGCGGCGGC	2799.77	0/0	0/0	0/0	0/0	1/1	0/0	0/0	1/1	0/0	0/0	0/0	0/0	1/1	0/0	0/0	0/0	0/0	0/0	0/0	0/0	0/0	0/0	0/0	0/0	GGGCGGCGGCGGC|downstream_gene_variant|MODIFIER|OS01G0115600|OS01G0115600|transcript|OS01T0115600-01|protein_coding||c.*707_*708insGGCGGCGGCGGC|||||583|,GGGCGGCGGCGGC|intergenic_region|MODIFIER|OS01G0115600-OS01G0115700|OS01G0115600-OS01G0115700|intergenic_region|OS01G0115600-OS01G0115700|||n.847981_847982insGGCGGCGGCGGC||||||
chr01	848025	AG	A	4062.73	0/0	0/0	0/0	0/0	1/1	0/0	0/0	1/1	0/0	0/0	0/0	0/0	1/1	0/0	0/0	0/0	0/0	0/0	0/0	0/0	0/0	0/0	0/0	0/0	A|downstream_gene_variant|MODIFIER|OS01G0115600|OS01G0115600|transcript|OS01T0115600-01|protein_coding||c.*752delG|||||627|,A|intergenic_region|MODIFIER|OS01G0115600-OS01G0115700|OS01G0115600-OS01G0115700|intergenic_region|OS01G0115600-OS01G0115700|||n.848026delG||||||
chr01	850590	T	TA	1257.8	0/0	0/0	0/0	0/0	1/1	0/0	0/0	1/1	0/0	0/0	0/0	0/0	1/1	0/0	0/0	0/0	0/0	0/0	0/0	0/0	0/0	0/0	0/0	0/0	TA|upstream_gene_variant|MODIFIER|OS01G0115725|OS01G0115725|transcript|OS01T0115725-00|protein_coding||c.-3634_-3633insA|||||1684|,TA|downstream_gene_variant|MODIFIER|OS01G0115700|OS01G0115700|transcript|OS01T0115700-00|protein_coding||c.*1658_*1659insT|||||1658|,TA|intergenic_region|MODIFIER|OS01G0115600-OS01G0115700|OS01G0115600-OS01G0115700|intergenic_region|OS01G0115600-OS01G0115700|||n.85059…
chr01	850750	A	AG	1011.02	0/0	0/0	0/0	0/0	1/1	0/0	0/0	1/1	0/0	0/0	0/0	0/0	1/1	0/0	0/0	0/0	0/0	0/0	0/0	0/0	0/0	0/0	0/0	0/0	AG|upstream_gene_variant|MODIFIER|OS01G0115725|OS01G0115725|transcript|OS01T0115725-00|protein_coding||c.-3474_-3473insG|||||1524|,AG|downstream_gene_variant|MODIFIER|OS01G0115700|OS01G0115700|transcript|OS01T0115700-00|protein_coding||c.*1498_*1499insC|||||1498|,AG|intergenic_region|MODIFIER|OS01G0115600-OS01G0115700|OS01G0115600-OS01G0115700|intergenic_region|OS01G0115600-OS01G0115700|||n.85075…
chr01	851958	GA	G	3952.73	0/0	0/0	0/0	0/0	1/1	0/0	0/0	1/1	0/0	0/0	0/0	0/0	1/1	0/0	0/0	0/0	0/0	0/0	0/0	0/0	0/0	0/0	0/0	0/0	G|upstream_gene_variant|MODIFIER|OS01G0115725|OS01G0115725|transcript|OS01T0115725-00|protein_coding||c.-2265delA|||||316|,G|downstream_gene_variant|MODIFIER|OS01G0115700|OS01G0115700|transcript|OS01T0115700-00|protein_coding||c.*290delT|||||290|,G|intergenic_region|MODIFIER|OS01G0115600-OS01G0115700|OS01G0115600-OS01G0115700|intergenic_region|OS01G0115600-OS01G0115700|||n.851959delA||||||
chr01	859660	T	TA	1701.77	0/0	0/0	0/0	0/0	1/1	0/0	0/0	1/1	0/0	0/0	0/0	0/0	1/1	0/0	0/0	0/0	0/0	0/0	0/0	0/0	0/0	0/0	0/0	0/0	TA|intron_variant|MODIFIER|OS01G0115750|OS01G0115750|transcript|OS01T0115750-00|protein_coding|1/1|c.782+141dupT||||||,TA|non_coding_transcript_exon_variant|MODIFIER|OS01G0115752|OS01G0115752|transcript|OS01T0115752-00|lincRNA|2/2|n.1278dupA||||||INFO_REALIGN_3_PRIME
chr01	859696	GC	G	3566.73	0/0	0/0	0/0	0/0	1/1	0/0	0/0	1/1	0/0	0/0	0/0	0/0	1/1	0/0	0/0	0/0	0/0	0/0	0/0	0/0	0/0	0/0	0/0	0/0	G|intron_variant|MODIFIER|OS01G0115750|OS01G0115750|transcript|OS01T0115750-00|protein_coding|1/1|c.782+105delG||||||,G|non_coding_transcript_exon_variant|MODIFIER|OS01G0115752|OS01G0115752|transcript|OS01T0115752-00|lincRNA|2/2|n.1311delC||||||INFO_REALIGN_3_PRIME
chr01	861144	A	AC	5457.77	0/0	0/0	0/0	0/0	1/1	0/0	0/0	1/1	0/0	0/0	0/0	0/0	1/1	0/0	0/0	0/0	0/0	0/0	0/0	0/0	0/0	0/0	0/0	0/0	AC|upstream_gene_variant|MODIFIER|OS01G0115750|OS01G0115750|transcript|OS01T0115750-00|protein_coding||c.-562_-561insG|||||562|,AC|upstream_gene_variant|MODIFIER|OS01G0115950|OS01G0115950|transcript|OS01T0115950-00|protein_coding||c.-2672_-2671insC|||||1970|,AC|downstream_gene_variant|MODIFIER|OS01G0115752|OS01G0115752|transcript|OS01T0115752-00|lincRNA||n.*623_*624insC|||||624|,AC|downstream_gen…
chr01	864521	TTCCAGTACG	T	8456.73	0/0	0/0	0/0	0/0	1/1	0/0	0/0	1/1	0/0	0/0	0/0	0/0	1/1	0/0	0/0	0/0	0/0	0/0	0/0	0/0	0/0	0/0	0/0	0/0	T|conservative_inframe_deletion|MODERATE|OS01G0115800|OS01G0115800|transcript|OS01T0115800-01|protein_coding|1/3|c.679_687delCGTACTGGA|p.Arg227_Gly229del|728/2483|679/900|227/299||,T|3_prime_UTR_variant|MODIFIER|OS01G0115950|OS01G0115950|transcript|OS01T0115950-00|protein_coding|2/2|c.*198_*206delTCCAGTACG|||||260|,T|upstream_gene_variant|MODIFIER|OS01G0115900|OS01G0115900|transcript|OS01T0115900…
chr01	865734	G	GA	4023.77	0/0	0/0	0/0	0/0	1/1	0/0	0/0	1/1	0/0	0/0	0/0	0/0	1/1	0/0	0/0	0/0	0/0	0/0	0/0	0/0	0/0	0/0	0/0	0/0	GA|upstream_gene_variant|MODIFIER|OS01G0115800|OS01G0115800|transcript|OS01T0115800-01|protein_coding||c.-527_-526insT|||||486|,GA|upstream_gene_variant|MODIFIER|OS01G0115900|OS01G0115900|transcript|OS01T0115900-00|protein_coding||c.-232_-231insA|||||203|,GA|downstream_gene_variant|MODIFIER|OS01G0115950|OS01G0115950|transcript|OS01T0115950-00|protein_coding||c.*1472_*1473insA|||||552|,GA|downstre…
chr01	870086	AT	A	3339.73	0/0	0/0	0/0	0/0	1/1	0/0	0/0	1/1	0/0	0/0	0/0	0/0	1/1	0/0	0/0	0/0	0/0	0/0	0/0	0/0	0/0	0/0	0/0	0/0	A|upstream_gene_variant|MODIFIER|OS01G0116100|OS01G0116100|transcript|OS01T0116100-01|protein_coding||c.-3895delA|||||554|,A|upstream_gene_variant|MODIFIER|EPlOSAG00000009665|EPlOSAG00000009665|transcript|EPlOSAT00000011053|lincRNA||n.-1231delT|||||1231|,A|upstream_gene_variant|MODIFIER|EPlOSAG00000009582|EPlOSAG00000009582|transcript|EPlOSAT00000010970|lincRNA||n.-1312delT|||||1312|,A|upstream_g…
chr01	870501	GCTCGCTCGCCGCTGCT	G	2391.26	0/0	0/0	0/0	0/0	1|1	0/0	0/0	1|1	0/0	0/0	0/0	0/0	1|1	0/0	0/0	0/0	0/0	0/0	0/0	0/0	0/0	0/0	0/0	0/0	G|upstream_gene_variant|MODIFIER|OS01G0116100|OS01G0116100|transcript|OS01T0116100-01|protein_coding||c.-4325_-4310delAGCAGCGGCGAGCGAG|||||969|,G|upstream_gene_variant|MODIFIER|EPlOSAG00000047807|EPlOSAG00000047807|transcript|EPlOSAT00000049195|lincRNA||n.-37_-22delAGCAGCGGCGAGCGAG|||||22|,G|upstream_gene_variant|MODIFIER|EPlOSAG00000009665|EPlOSAG00000009665|transcript|EPlOSAT00000011053|lincRNA…
chr01	870842	G	GAAAAAAGAAGA	4455.77	0/0	0/0	0/0	0/0	1/1	0/0	0/0	1/1	0/0	0/0	0/0	0/0	1/1	0/0	0/0	0/0	0/0	0/0	0/0	0/0	0/0	0/0	0/0	0/0	GAAAAAAGAAGA|upstream_gene_variant|MODIFIER|OS01G0116100|OS01G0116100|transcript|OS01T0116100-01|protein_coding||c.-4651_-4650insTCTTCTTTTTT|||||1310|,GAAAAAAGAAGA|upstream_gene_variant|MODIFIER|EPlOSAG00000047807|EPlOSAG00000047807|transcript|EPlOSAT00000049195|lincRNA||n.-363_-362insTCTTCTTTTTT|||||363|,GAAAAAAGAAGA|upstream_gene_variant|MODIFIER|EPlOSAG00000009665|EPlOSAG00000009665|transcript…
chr01	871242	C	CTAGTCAAGTTTGACTAA	826.82	0/0	0/0	0/0	0/0	1/1	0/0	0/0	1/1	0/0	0/0	0/0	0/0	1/1	0/0	0/0	0/0	0/0	0/0	0/0	0/0	0/0	0/0	0/0	0/0	CTAGTCAAGTTTGACTAA|upstream_gene_variant|MODIFIER|OS01G0116100|OS01G0116100|transcript|OS01T0116100-01|protein_coding||c.-5051_-5050insTTAGTCAAACTTGACTA|||||1710|,CTAGTCAAGTTTGACTAA|upstream_gene_variant|MODIFIER|EPlOSAG00000047807|EPlOSAG00000047807|transcript|EPlOSAT00000049195|lincRNA||n.-763_-762insTTAGTCAAACTTGACTA|||||763|,CTAGTCAAGTTTGACTAA|upstream_gene_variant|MODIFIER|EPlOSAG00000009665…
chr01	879455	A	AAT	3534.77	0/0	0/0	0/0	0/0	1/1	0/0	0/0	1/1	0/0	0/0	0/0	0/0	1/1	0/0	0/0	0/0	0/0	0/0	0/0	0/0	0/0	0/0	0/0	0/0	AAT|intergenic_region|MODIFIER|OS01G0116000-EPlOSAG00000000714|OS01G0116000-EPlOSAG00000000714|intergenic_region|OS01G0116000-EPlOSAG00000000714|||n.879455_879456insAT||||||
chr01	880081	C	CATACACACATTACG,CA	1170.14	0/0	0/0	0/0	0/0	1|1	0/0	0/0	2|2	0/0	0/0	0/0	0/0	./.	0/0	0/0	0/0	0/0	0/0	0/0	0/0	0/0	0/0	0/0	0/0	CA|intergenic_region|MODIFIER|OS01G0116000-EPlOSAG00000000714|OS01G0116000-EPlOSAG00000000714|intergenic_region|OS01G0116000-EPlOSAG00000000714|||n.880081_880082insA||||||,CATACACACATTACG|intergenic_region|MODIFIER|OS01G0116000-EPlOSAG00000000714|OS01G0116000-EPlOSAG00000000714|intergenic_region|OS01G0116000-EPlOSAG00000000714|||n.880081_880082insATACACACATTACG||||||
chr01	880082	T	TACACACATTACGTCTCGGA	804.41	0/0	0/0	0/0	0/0	./.	0/0	0/0	1|1	0/0	0/0	0/0	0/0	./.	0/0	0/0	0/0	0/0	0/0	0/0	0/0	0/0	0/0	0/0	0/0	TACACACATTACGTCTCGGA|intergenic_region|MODIFIER|OS01G0116000-EPlOSAG00000000714|OS01G0116000-EPlOSAG00000000714|intergenic_region|OS01G0116000-EPlOSAG00000000714|||n.880082_880083insACACACATTACGTCTCGGA||||||
chr01	885081	TG	T	4817.96	0/0	./.	0/0	./.	./.	0/0	./.	./.	1/1	1/1	0/0	1/1	./.	./.	0/0	./.	0/0	./.	0/0	1/1	1|1	1/1	1/1	0/0	T|intergenic_region|MODIFIER|OS01G0116000-EPlOSAG00000000714|OS01G0116000-EPlOSAG00000000714|intergenic_region|OS01G0116000-EPlOSAG00000000714|||n.885082delG||||||
chr01	903980	TGAGAGACGGAGGTGG	T	4854.73	0/0	0/0	0/0	0/0	1/1	0/0	0/0	1/1	0/0	0/0	0/0	0/0	1/1	0/0	0/0	0/0	0/0	0/0	0/0	0/0	0/0	0/0	0/0	0/0	T|intergenic_region|MODIFIER|EPlOSAG00000000714-EPlOSAG00000023410|EPlOSAG00000000714-EPlOSAG00000023410|intergenic_region|EPlOSAG00000000714-EPlOSAG00000023410|||n.903981_903995delGAGAGACGGAGGTGG||||||
chr01	904551	T	TGA	4006.77	0/0	0/0	0/0	0/0	0/0	0/0	1/1	0/0	0/0	1/1	0/0	0/0	0/0	0/0	0/0	0/0	0/0	0/0	0/0	1/1	0/0	0/0	0/0	0/0	TGA|intergenic_region|MODIFIER|EPlOSAG00000000714-EPlOSAG00000023410|EPlOSAG00000000714-EPlOSAG00000023410|intergenic_region|EPlOSAG00000000714-EPlOSAG00000023410|||n.904551_904552insGA||||||
chr01	911314	ACGCCATTCGCGACCGGCTGC	A	3334.73	0/0	0/0	0/0	0/0	1/1	0/0	0/0	1/1	0/0	0/0	0/0	0/0	1/1	0/0	0/0	0/0	0/0	0/0	0/0	0/0	0/0	0/0	0/0	0/0	A|upstream_gene_variant|MODIFIER|OS01G0116250|OS01G0116250|transcript|OS01T0116250-00|protein_coding||c.-673_-654delCGCCATTCGCGACCGGCTGC|||||663|,A|downstream_gene_variant|MODIFIER|OS01G0116200|OS01G0116200|transcript|OS01T0116200-01|protein_coding||c.*523_*542delGCAGCCGGTCGCGAATGGCG|||||420|,A|intergenic_region|MODIFIER|EPlOSAG00000023410-OS01G0116200|EPlOSAG00000023410-OS01G0116200|intergenic_r…
chr01	911421	G	GA	3734.8	0/0	0/0	0/0	0/0	1/1	0/0	0/0	1/1	0/0	0/0	0/0	0/0	1|1	0/0	0/0	0/0	0/0	0/0	0/0	0/0	0/0	0/0	0/0	0/0	GA|upstream_gene_variant|MODIFIER|OS01G0116250|OS01G0116250|transcript|OS01T0116250-00|protein_coding||c.-567_-566insA|||||556|,GA|downstream_gene_variant|MODIFIER|OS01G0116200|OS01G0116200|transcript|OS01T0116200-01|protein_coding||c.*435_*436insT|||||313|,GA|intergenic_region|MODIFIER|EPlOSAG00000023410-OS01G0116200|EPlOSAG00000023410-OS01G0116200|intergenic_region|EPlOSAG00000023410-OS01G01162…
chr01	911422	G	GA	6626.74	0/0	0/0	0/0	0/0	1/1	0/0	0/0	1/1	0/0	0/0	0/0	0/0	1|1	0/0	0/0	0/0	0/0	0/0	0/0	0/0	0/0	0/0	0/0	0/0	GA|upstream_gene_variant|MODIFIER|OS01G0116250|OS01G0116250|transcript|OS01T0116250-00|protein_coding||c.-566_-565insA|||||555|,GA|downstream_gene_variant|MODIFIER|OS01G0116200|OS01G0116200|transcript|OS01T0116200-01|protein_coding||c.*434_*435insT|||||312|,GA|intergenic_region|MODIFIER|EPlOSAG00000023410-OS01G0116200|EPlOSAG00000023410-OS01G0116200|intergenic_region|EPlOSAG00000023410-OS01G01162…
chr01	913662	G	GATAGATGGTGCTCCAAACGATGGGAGC	6794.77	0/0	0/0	0/0	0/0	1/1	0/0	0/0	1/1	0/0	0/0	0/0	0/0	1/1	0/0	0/0	0/0	0/0	0/0	0/0	0/0	0/0	0/0	0/0	0/0	GATAGATGGTGCTCCAAACGATGGGAGC|disruptive_inframe_insertion|MODERATE|OS01G0116200|OS01G0116200|transcript|OS01T0116200-01|protein_coding|1/3|c.531_557dupGCTCCCATCGTTTGGAGCACCATCTAT|p.Met177_Ser185dup|584/2282|557/2133|186/710||,GATAGATGGTGCTCCAAACGATGGGAGC|3_prime_UTR_variant|MODIFIER|OS01G0116250|OS01G0116250|transcript|OS01T0116250-00|protein_coding|2/2|c.*1171_*1197dupGATGGTGCTCCAAACGATGGGAGCATA…
chr01	914378	TA	T	2357.06	0/0	0/0	0/0	0/0	0/0	0/0	0/0	0/0	0/0	0/0	0/0	0/0	0/0	0/0	0/0	0/0	1/1	0/0	0/0	0/0	0/0	0/0	0/0	0/0	T|upstream_gene_variant|MODIFIER|OS01G0116200|OS01G0116200|transcript|OS01T0116200-01|protein_coding||c.-160delT|||||133|,T|upstream_gene_variant|MODIFIER|OS01G0116300|OS01G0116300|transcript|OS01T0116300-01|protein_coding||c.-1260delA|||||1226|,T|downstream_gene_variant|MODIFIER|OS01G0116250|OS01G0116250|transcript|OS01T0116250-00|protein_coding||c.*2074delA|||||236|,T|intergenic_region|MODIFIER…
chr01	914755	A	AT	2381.78	0/0	0/0	0/0	0/0	1/1	0/0	0/0	1/1	0/0	0/0	0/0	0/0	1/1	0/0	0/0	0/0	0/0	0/0	0/0	0/0	0/0	0/0	0/0	0/0	AT|upstream_gene_variant|MODIFIER|OS01G0116200|OS01G0116200|transcript|OS01T0116200-01|protein_coding||c.-537_-536insA|||||510|,AT|upstream_gene_variant|MODIFIER|OS01G0116300|OS01G0116300|transcript|OS01T0116300-01|protein_coding||c.-884_-883insT|||||849|,AT|upstream_gene_variant|MODIFIER|EPlOSAG00000039296|EPlOSAG00000039296|transcript|EPlOSAT00000040684|lincRNA||n.-1781_-1780insT|||||1780|,AT|d…
chr01	920843	T	TTTGC	5060.77	0/0	0/0	0/0	0/0	1|1	0/0	0/0	1|1	0/0	0/0	0/0	0/0	1|1	0/0	0/0	0/0	0/0	0/0	0/0	0/0	0/0	0/0	0/0	0/0	TTTGC|upstream_gene_variant|MODIFIER|OS01G0116650|OS01G0116650|transcript|OS01T0116650-00|protein_coding||c.-739_-738insTTGC|||||452|,TTTGC|downstream_gene_variant|MODIFIER|OS01G0116400|OS01G0116400|transcript|OS01T0116400-01|protein_coding||c.*427_*428insGCAA|||||234|,TTTGC|intergenic_region|MODIFIER|OS01G0116300-OS01G0116400|OS01G0116300-OS01G0116400|intergenic_region|OS01G0116300-OS01G0116400|…
chr01	920847	T	TACGAAGCCAAAATTTAAATTTGAA	6572.77	0/0	0/0	0/0	0/0	1|1	0/0	0/0	1|1	0/0	0/0	0/0	0/0	1|1	0/0	0/0	0/0	0/0	0/0	0/0	0/0	0/0	0/0	0/0	0/0	TACGAAGCCAAAATTTAAATTTGAA|upstream_gene_variant|MODIFIER|OS01G0116650|OS01G0116650|transcript|OS01T0116650-00|protein_coding||c.-735_-734insACGAAGCCAAAATTTAAATTTGAA|||||448|,TACGAAGCCAAAATTTAAATTTGAA|downstream_gene_variant|MODIFIER|OS01G0116400|OS01G0116400|transcript|OS01T0116400-01|protein_coding||c.*423_*424insTTCAAATTTAAATTTTGGCTTCGT|||||230|,TACGAAGCCAAAATTTAAATTTGAA|intergenic_region|MODIF…
chr01	920883	AT	A	4175.73	0/0	0/0	0/0	0/0	1/1	0/0	0/0	1/1	0/0	0/0	0/0	0/0	1/1	0/0	0/0	0/0	0/0	0/0	0/0	0/0	0/0	0/0	0/0	0/0	A|upstream_gene_variant|MODIFIER|OS01G0116650|OS01G0116650|transcript|OS01T0116650-00|protein_coding||c.-698delT|||||412|,A|downstream_gene_variant|MODIFIER|OS01G0116400|OS01G0116400|transcript|OS01T0116400-01|protein_coding||c.*387delA|||||194|,A|intergenic_region|MODIFIER|OS01G0116300-OS01G0116400|OS01G0116300-OS01G0116400|intergenic_region|OS01G0116300-OS01G0116400|||n.920884delT||||||
chr01	928815	CGGA	C	5821.73	0/0	0/0	0/0	0/0	1/1	0/0	0/0	1/1	0/0	0/0	0/0	0/0	1/1	0/0	0/0	0/0	0/0	0/0	0/0	0/0	0/0	0/0	0/0	0/0	C|upstream_gene_variant|MODIFIER|EPlOSAG00000009523|EPlOSAG00000009523|transcript|EPlOSAT00000010911|lincRNA||n.-1132_-1130delTCC|||||1130|,C|downstream_gene_variant|MODIFIER|EPlOSAG00000009546|EPlOSAG00000009546|transcript|EPlOSAT00000010934|lincRNA||n.*1133_*1135delGGA|||||1133|,C|downstream_gene_variant|MODIFIER|OS01G0116600|OS01G0116600|transcript|OS01T0116600-01|protein_coding||c.*1289_*1291…
chr01	929700	C	CA	2936.77	0/0	0/0	0/0	0/0	1|1	0/0	0/0	1|1	0/0	0/0	0/0	0/0	1|1	0/0	0/0	0/0	0/0	0/0	0/0	0/0	0/0	0/0	0/0	0/0	CA|downstream_gene_variant|MODIFIER|OS01G0116600|OS01G0116600|transcript|OS01T0116600-01|protein_coding||c.*406_*407insT|||||183|WARNING_TRANSCRIPT_NO_START_CODON,CA|downstream_gene_variant|MODIFIER|OS01G0116600|OS01G0116600|transcript|OS01T0116600-02|protein_coding||c.*406_*407insT|||||183|WARNING_TRANSCRIPT_NO_START_CODON,CA|intron_variant|MODIFIER|OS01G0116900|OS01G0116900|transcript|OS01T0116…
chr01	930266	A	AC	6064.77	0/0	0/0	0/0	0/0	1/1	0/0	0/0	1/1	0/0	0/0	0/0	0/0	1/1	0/0	0/0	0/0	0/0	0/0	0/0	0/0	0/0	0/0	0/0	0/0	AC|intron_variant|MODIFIER|OS01G0116900|OS01G0116900|transcript|OS01T0116900-00|protein_coding|1/2|c.390+5426_390+5427insC||||||,AC|intron_variant|MODIFIER|OS01G0116600|OS01G0116600|transcript|OS01T0116600-01|protein_coding|10/10|c.1888-26_1888-25insG||||||WARNING_TRANSCRIPT_NO_START_CODON,AC|intron_variant|MODIFIER|OS01G0116600|OS01G0116600|transcript|OS01T0116600-02|protein_coding|6/6|c.1252-26…
chr01	931254	AT	A	5532.73	0/0	0/0	0/0	0/0	1/1	0/0	0/0	1/1	0/0	0/0	0/0	0/0	1/1	0/0	0/0	0/0	0/0	0/0	0/0	0/0	0/0	0/0	0/0	0/0	A|intron_variant|MODIFIER|OS01G0116900|OS01G0116900|transcript|OS01T0116900-00|protein_coding|1/2|c.390+6415delT||||||,A|intron_variant|MODIFIER|OS01G0116600|OS01G0116600|transcript|OS01T0116600-01|protein_coding|7/10|c.1347-49delA||||||WARNING_TRANSCRIPT_NO_START_CODON,A|intron_variant|MODIFIER|OS01G0116600|OS01G0116600|transcript|OS01T0116600-02|protein_coding|3/6|c.711-49delA||||||WARNING_TRAN…
chr01	934333	TTCATCATAC	T	3965.73	0/0	0/0	0/0	0/0	1|1	0/0	0/0	1|1	0/0	0/0	0/0	0/0	1|1	0/0	0/0	0/0	0/0	0/0	0/0	0/0	0/0	0/0	0/0	0/0	T|disruptive_inframe_deletion|MODERATE|OS01G0116600|OS01G0116600|transcript|OS01T0116600-01|protein_coding|1/11|c.117_125delGTATGATGA|p.Tyr40_Glu42del|125/2245|117/2022|39/673||WARNING_TRANSCRIPT_NO_START_CODON,T|upstream_gene_variant|MODIFIER|OS01G0116901|OS01G0116901|transcript|OS01T0116901-00|protein_coding||c.-1323_-1315delTCATCATAC|||||1284|,T|upstream_gene_variant|MODIFIER|OS01G0116600|OS01…
chr01	934429	TG	T	455.06	0/0	0/0	0/0	0/0	0/0	0/0	0/0	0/0	0/0	0/0	0/0	0/0	1/1	0/0	0/0	0/0	0/0	0/0	0/0	0/0	0/0	0/0	0/0	0/0	T|frameshift_variant|HIGH|OS01G0116600|OS01G0116600|transcript|OS01T0116600-01|protein_coding|1/11|c.29delC|p.Pro10fs|29/2245|29/2022|10/673||WARNING_TRANSCRIPT_NO_START_CODON,T|upstream_gene_variant|MODIFIER|OS01G0116901|OS01G0116901|transcript|OS01T0116901-00|protein_coding||c.-1227delG|||||1188|,T|downstream_gene_variant|MODIFIER|OS01G0116800|OS01G0116800|transcript|OS01T0116800-00|protein_cod…
chr01	935133	GTC	G	155.49	0/0	0/0	0/0	0/0	./.	0/0	0/0	./.	0/0	0/0	0/0	0/0	1|1	0/0	0/0	0/0	0/0	0/0	0/0	0/0	0/0	0/0	0/0	0/0	G|upstream_gene_variant|MODIFIER|OS01G0116600|OS01G0116600|transcript|OS01T0116600-01|protein_coding||c.-677_-676delGA|||||676|WARNING_TRANSCRIPT_NO_START_CODON,G|upstream_gene_variant|MODIFIER|OS01G0116901|OS01G0116901|transcript|OS01T0116901-00|protein_coding||c.-523_-522delTC|||||484|,G|downstream_gene_variant|MODIFIER|OS01G0116800|OS01G0116800|transcript|OS01T0116800-00|protein_coding||c.*439…
chr01	935136	A	AGC	112.85	0/0	0/0	0/0	0/0	./.	0/0	0/0	./.	0/0	0/0	0/0	0/0	1|1	0/0	0/0	0/0	0/0	0/0	0/0	0/0	0/0	0/0	0/0	0/0	AGC|upstream_gene_variant|MODIFIER|OS01G0116600|OS01G0116600|transcript|OS01T0116600-01|protein_coding||c.-679_-678insGC|||||679|WARNING_TRANSCRIPT_NO_START_CODON,AGC|upstream_gene_variant|MODIFIER|OS01G0116901|OS01G0116901|transcript|OS01T0116901-00|protein_coding||c.-521_-520insGC|||||481|,AGC|downstream_gene_variant|MODIFIER|OS01G0116800|OS01G0116800|transcript|OS01T0116800-00|protein_coding||…
chr01	936749	A	AG	5298.77	0/0	0/0	0/0	0/0	1|1	0/0	0/0	1|1	0/0	0/0	0/0	0/0	1|1	0/0	0/0	0/0	0/0	0/0	0/0	0/0	0/0	0/0	0/0	0/0	AG|3_prime_UTR_variant|MODIFIER|OS01G0116901|OS01G0116901|transcript|OS01T0116901-00|protein_coding|1/2|c.*569dupG|||||570|INFO_REALIGN_3_PRIME,AG|upstream_gene_variant|MODIFIER|OS01G0116800|OS01G0116800|transcript|OS01T0116800-00|protein_coding||c.-46dupC|||||46|,AG|intron_variant|MODIFIER|OS01G0116900|OS01G0116900|transcript|OS01T0116900-00|protein_coding|1/2|c.391-2600dupG||||||INFO_REALIGN_3_…
chr01	936752	T	TTTTG	5523.77	0/0	0/0	0/0	0/0	1|1	0/0	0/0	1|1	0/0	0/0	0/0	0/0	1|1	0/0	0/0	0/0	0/0	0/0	0/0	0/0	0/0	0/0	0/0	0/0	TTTTG|3_prime_UTR_variant|MODIFIER|OS01G0116901|OS01G0116901|transcript|OS01T0116901-00|protein_coding|1/2|c.*574_*575insGTTT|||||575|INFO_REALIGN_3_PRIME,TTTTG|upstream_gene_variant|MODIFIER|OS01G0116800|OS01G0116800|transcript|OS01T0116800-00|protein_coding||c.-49_-48insCAAA|||||49|,TTTTG|intron_variant|MODIFIER|OS01G0116900|OS01G0116900|transcript|OS01T0116900-00|protein_coding|1/2|c.391-2595_…
chr01	936782	A	ATTC	6018.77	0/0	0/0	0/0	0/0	1|1	0/0	0/0	1|1	0/0	0/0	0/0	0/0	1|1	0/0	0/0	0/0	0/0	0/0	0/0	0/0	0/0	0/0	0/0	0/0	ATTC|3_prime_UTR_variant|MODIFIER|OS01G0116901|OS01G0116901|transcript|OS01T0116901-00|protein_coding|1/2|c.*602_*603insTCT|||||603|INFO_REALIGN_3_PRIME,ATTC|upstream_gene_variant|MODIFIER|OS01G0116800|OS01G0116800|transcript|OS01T0116800-00|protein_coding||c.-79_-78insGAA|||||79|,ATTC|intron_variant|MODIFIER|OS01G0116900|OS01G0116900|transcript|OS01T0116900-00|protein_coding|1/2|c.391-2567_391-2…
chr01	937177	GAAAC	G	9594.73	0/0	0/0	0/0	0/0	1|1	0/0	0/0	1|1	0/0	0/0	0/0	0/0	1|1	0/0	0/0	0/0	0/0	0/0	0/0	0/0	0/0	0/0	0/0	0/0	G|upstream_gene_variant|MODIFIER|OS01G0116800|OS01G0116800|transcript|OS01T0116800-00|protein_coding||c.-477_-474delGTTT|||||474|,G|intron_variant|MODIFIER|OS01G0116900|OS01G0116900|transcript|OS01T0116900-00|protein_coding|1/2|c.391-2172_391-2169delAAAC||||||,G|intron_variant|MODIFIER|OS01G0116901|OS01G0116901|transcript|OS01T0116901-00|protein_coding|1/1|c.*804+193_*804+196delAAAC||||||
chr01	937295	G	GATCCATTGGGAATC	2615.14	0/0	0/0	0/0	0/0	1|1	0/0	0/0	1|1	0/0	0/0	0/0	0/0	./.	0/0	0/0	0/0	0/0	0/0	0/0	0/0	0/0	0/0	0/0	0/0	GATCCATTGGGAATC|upstream_gene_variant|MODIFIER|OS01G0116800|OS01G0116800|transcript|OS01T0116800-00|protein_coding||c.-592_-591insGATTCCCAATGGAT|||||592|,GATCCATTGGGAATC|intron_variant|MODIFIER|OS01G0116900|OS01G0116900|transcript|OS01T0116900-00|protein_coding|1/2|c.391-2055_391-2054insATCCATTGGGAATC||||||,GATCCATTGGGAATC|intron_variant|MODIFIER|OS01G0116901|OS01G0116901|transcript|OS01T0116901-…
chr01	950135	CT	C	4366.74	0/0	0/0	0/0	0/0	1/1	0/0	0/0	1/1	0/0	0/0	0/0	0/0	1/1	0/0	0/0	0/0	0/0	0/0	0/0	0/0	0/0	0/0	0/0	0/0	C|intron_variant|MODIFIER|OS01G0116900|OS01G0116900|transcript|OS01T0116900-00|protein_coding|2/2|c.476-5431delT||||||
chr01	954239	CG	C	5188.73	0/0	0/0	0/0	0/0	1|1	0/0	0/0	1|1	0/0	0/0	0/0	0/0	1|1	0/0	0/0	0/0	0/0	0/0	0/0	0/0	0/0	0/0	0/0	0/0	C|intron_variant|MODIFIER|OS01G0116900|OS01G0116900|transcript|OS01T0116900-00|protein_coding|2/2|c.476-1327delG||||||
chr01	960534	GGAA	G	6485.73	0/0	0/0	0/0	0/0	1/1	0/0	0/0	1/1	0/0	0/0	0/0	0/0	1/1	0/0	0/0	0/0	0/0	0/0	0/0	0/0	0/0	0/0	0/0	0/0	G|disruptive_inframe_deletion|MODERATE|OS01G0117000|OS01G0117000|transcript|OS01T0117000-00|protein_coding|1/5|c.90_92delTTC|p.Ser31del|92/2223|90/2223|30/740||,G|3_prime_UTR_variant|MODIFIER|OS01G0117025|OS01G0117025|transcript|OS01T0117025-00|protein_coding|3/3|c.*1728_*1730delAAG|||||1856|INFO_REALIGN_3_PRIME,G|upstream_gene_variant|MODIFIER|OS01G0117100|OS01G0117100|transcript|OS01T0117100-00…
chr01	961415	CAAAT	C	6846.73	0/0	0/0	0/0	0/0	1/1	0/0	0/0	1/1	0/0	0/0	0/0	0/0	1/1	0/0	0/0	0/0	0/0	0/0	0/0	0/0	0/0	0/0	0/0	0/0	C|upstream_gene_variant|MODIFIER|OS01G0117000|OS01G0117000|transcript|OS01T0117000-00|protein_coding||c.-793_-790delATTT|||||790|,C|upstream_gene_variant|MODIFIER|OS01G0117100|OS01G0117100|transcript|OS01T0117100-00|protein_coding||c.-2641_-2638delAAAT|||||383|WARNING_TRANSCRIPT_NO_START_CODON,C|downstream_gene_variant|MODIFIER|OS01G0117025|OS01G0117025|transcript|OS01T0117025-00|protein_coding||…
chr01	966077	T	TC	3603.77	0/0	0/0	0/0	0/0	1/1	0/0	0/0	1/1	0/0	0/0	0/0	0/0	1/1	0/0	0/0	0/0	0/0	0/0	0/0	0/0	0/0	0/0	0/0	0/0	TC|downstream_gene_variant|MODIFIER|OS01G0117100|OS01G0117100|transcript|OS01T0117100-00|protein_coding||c.*926_*927insC|||||927|WARNING_TRANSCRIPT_NO_START_CODON,TC|intergenic_region|MODIFIER|OS01G0117100-OS01G0117200|OS01G0117100-OS01G0117200|intergenic_region|OS01G0117100-OS01G0117200|||n.966077_966078insC||||||
chr01	967895	TA	T	1309.73	0/0	0/0	0/0	0/0	1/1	0/0	0/0	1/1	0/0	0/0	0/0	0/0	1/1	0/0	0/0	0/0	0/0	0/0	0/0	0/0	0/0	0/0	0/0	0/0	T|upstream_gene_variant|MODIFIER|OS01G0117233|OS01G0117233|transcript|OS01T0117233-00|lincRNA||n.-1643delA|||||1643|,T|downstream_gene_variant|MODIFIER|OS01G0117200|OS01G0117200|transcript|OS01T0117200-01|protein_coding||c.*1591delT|||||1444|,T|intergenic_region|MODIFIER|OS01G0117100-OS01G0117200|OS01G0117100-OS01G0117200|intergenic_region|OS01G0117100-OS01G0117200|||n.967896delA||||||
chr01	967949	TA	T	1358.73	0/0	0/0	0/0	0/0	1/1	0/0	0/0	1/1	0/0	0/0	0/0	0/0	1/1	0/0	0/0	0/0	0/0	0/0	0/0	0/0	0/0	0/0	0/0	0/0	T|upstream_gene_variant|MODIFIER|OS01G0117233|OS01G0117233|transcript|OS01T0117233-00|lincRNA||n.-1589delA|||||1589|,T|downstream_gene_variant|MODIFIER|OS01G0117200|OS01G0117200|transcript|OS01T0117200-01|protein_coding||c.*1537delT|||||1390|,T|intergenic_region|MODIFIER|OS01G0117100-OS01G0117200|OS01G0117100-OS01G0117200|intergenic_region|OS01G0117100-OS01G0117200|||n.967950delA||||||
chr01	969891	C	CT	7153.77	0/0	0/0	0/0	0/0	1/1	0/0	0/0	1/1	0/0	0/0	0/0	0/0	1/1	0/0	0/0	0/0	0/0	0/0	0/0	0/0	0/0	0/0	0/0	0/0	CT|frameshift_variant|HIGH|OS01G0117200|OS01G0117200|transcript|OS01T0117200-01|protein_coding|3/3|c.1767dupA|p.Asp590fs|1789/2341|1767/2172|589/723||,CT|non_coding_transcript_exon_variant|MODIFIER|OS01G0117233|OS01G0117233|transcript|OS01T0117233-00|lincRNA|1/1|n.354dupT||||||INFO_REALIGN_3_PRIME
chr01	977176	GA	G	5346.73	0/0	0/0	0/0	0/0	1/1	0/0	0/0	1/1	0/0	0/0	0/0	0/0	1/1	0/0	0/0	0/0	0/0	0/0	0/0	0/0	0/0	0/0	0/0	0/0	G|frameshift_variant|HIGH|OS01G0117266|OS01G0117266|transcript|OS01T0117266-00|protein_coding|1/1|c.413delA|p.Lys138fs|413/453|413/453|138/150||INFO_REALIGN_3_PRIME,G|upstream_gene_variant|MODIFIER|EPlOSAG00000027859|EPlOSAG00000027859|transcript|EPlOSAT00000029247|lincRNA||n.-660delT|||||660|,G|downstream_gene_variant|MODIFIER|EPlOSAG00000032413|EPlOSAG00000032413|transcript|EPlOSAT00000033801|l…
chr01	977369	C	CTAT	6803.77	0/0	0/0	0/0	0/0	1/1	0/0	0/0	1/1	0/0	0/0	0/0	0/0	1/1	0/0	0/0	0/0	0/0	0/0	0/0	0/0	0/0	0/0	0/0	0/0	CTAT|upstream_gene_variant|MODIFIER|EPlOSAG00000027859|EPlOSAG00000027859|transcript|EPlOSAT00000029247|lincRNA||n.-853_-852insATA|||||853|,CTAT|upstream_gene_variant|MODIFIER|OS01G0117300|OS01G0117300|transcript|OS01T0117300-00|protein_coding||c.-1869_-1868insTAT|||||1868|WARNING_TRANSCRIPT_NO_START_CODON,CTAT|upstream_gene_variant|MODIFIER|EPlOSAG00000021072|EPlOSAG00000021072|transcript|EPlOSA…
chr01	984348	C	CT	1593.57	0/0	0/0	0/0	0/0	1|1	0/0	0/0	1|1	0/0	0/0	0/0	0/0	1|1	0/0	0/0	0/0	0/0	0/0	0/0	0/0	0/0	0/0	0/0	0/0	CT|upstream_gene_variant|MODIFIER|OS01G0117450|OS01G0117450|transcript|OS01T0117450-00|protein_coding||c.-239_-238insT|||||187|,CT|downstream_gene_variant|MODIFIER|OS01G0117400|OS01G0117400|transcript|OS01T0117400-00|protein_coding||c.*161_*162insA|||||161|,CT|intergenic_region|MODIFIER|OS01G0117300-OS01G0117400|OS01G0117300-OS01G0117400|intergenic_region|OS01G0117300-OS01G0117400|||n.984348_9843…
chr01	993586	C	CT	3930.77	0/0	0/0	0/0	0/0	1/1	0/0	0/0	1/1	0/0	0/0	0/0	0/0	1/1	0/0	0/0	0/0	0/0	0/0	0/0	0/0	0/0	0/0	0/0	0/0	CT|upstream_gene_variant|MODIFIER|OS01G0117650|OS01G0117650|transcript|OS01T0117650-00|protein_coding||c.-1401_-1400insT|||||1368|,CT|downstream_gene_variant|MODIFIER|OS01G0117600|OS01G0117600|transcript|OS01T0117600-01|protein_coding||c.*1323_*1324insA|||||1125|WARNING_TRANSCRIPT_NO_START_CODON,CT|intergenic_region|MODIFIER|OS01G0117500-OS01G0117600|OS01G0117500-OS01G0117600|intergenic_region|OS…
chr01	994043	C	CA	2019.71	0/0	0/0	0/0	0/0	1/1	0/0	0/0	1/1	0/0	0/0	0/0	0/0	1/1	0/0	0/0	0/0	0/0	0/0	0/0	0/0	0/0	0/0	0/0	0/0	CA|upstream_gene_variant|MODIFIER|OS01G0117650|OS01G0117650|transcript|OS01T0117650-00|protein_coding||c.-944_-943insA|||||911|,CA|downstream_gene_variant|MODIFIER|OS01G0117600|OS01G0117600|transcript|OS01T0117600-01|protein_coding||c.*866_*867insT|||||668|WARNING_TRANSCRIPT_NO_START_CODON,CA|intergenic_region|MODIFIER|OS01G0117500-OS01G0117600|OS01G0117500-OS01G0117600|intergenic_region|OS01G011…
chr01	1002168	TCTATCGCTC	T	7839.73	0/0	0/0	0/0	0/0	1/1	0/0	0/0	1/1	0/0	0/0	0/0	0/0	1/1	0/0	0/0	0/0	0/0	0/0	0/0	0/0	0/0	0/0	0/0	0/0	T|downstream_gene_variant|MODIFIER|OS01G0117700|OS01G0117700|transcript|OS01T0117700-00|protein_coding||c.*1172_*1180delCTATCGCTC|||||1172|,T|intergenic_region|MODIFIER|OS01G0117700-OS01G0117900|OS01G0117700-OS01G0117900|intergenic_region|OS01G0117700-OS01G0117900|||n.1002169_1002177delCTATCGCTC||||||
chr01	1013597	TA	T	2983.77	0/0	0/0	0/0	0/0	1/1	0/0	0/0	1/1	0/0	0/0	0/0	0/0	1/1	0/0	0/0	0/0	0/0	0/0	0/0	0/0	0/0	0/0	0/0	0/0	T|upstream_gene_variant|MODIFIER|EPlOSAG00000042830|EPlOSAG00000042830|transcript|EPlOSAT00000044218|lincRNA||n.-400delT|||||400|,T|downstream_gene_variant|MODIFIER|OS01G0117900|OS01G0117900|transcript|OS01T0117900-02|protein_coding||c.*1463delA|||||1320|,T|downstream_gene_variant|MODIFIER|EPlOSAG00000042934|EPlOSAG00000042934|transcript|EPlOSAT00000044322|lincRNA||n.*400delA|||||400|,T|downstrea…
chr01	1015054	A	ACTCTCTCTCT	7254.76	0/0	0/0	0/0	0/0	1/1	0/0	0/0	1/1	0/0	0/0	0/0	0/0	1/1	0/0	0/0	0/0	0/0	0/0	0/0	0/0	0/0	0/0	0/0	0/0	ACTCTCTCTCT|upstream_gene_variant|MODIFIER|EPlOSAG00000042830|EPlOSAG00000042830|transcript|EPlOSAT00000044218|lincRNA||n.-1857_-1856insAGAGAGAGAG|||||1857|,ACTCTCTCTCT|upstream_gene_variant|MODIFIER|OS01G0118000|OS01G0118000|transcript|OS01T0118000-01|protein_coding||c.-1076_-1075insCTCTCTCTCT|||||1010|,ACTCTCTCTCT|downstream_gene_variant|MODIFIER|EPlOSAG00000042934|EPlOSAG00000042934|transcript…
chr01	1018188	CA	C	10091.9	0/0	0/0	0/0	0/0	1/1	0/0	0/0	1/1	0/0	1/1	0/0	0/0	1/1	0/0	0/0	0/0	0/0	0/0	0/0	1/1	0/0	0/0	0/0	0/0	C|upstream_gene_variant|MODIFIER|OS01G0118033|OS01G0118033|transcript|OS01T0118033-00|lincRNA||n.-272delT|||||272|,C|intron_variant|MODIFIER|OS01G0118000|OS01G0118000|transcript|OS01T0118000-01|protein_coding|4/5|c.618+98delA||||||
chr01	1019605	G	GA	2897.91	0/0	0/0	0/0	0/0	1/1	0/0	0/0	1/1	0/0	1/1	0/0	0/0	1/1	0/0	0/0	0/0	0/0	0/0	0/0	1/1	0/0	0/0	0/0	0/0	GA|upstream_gene_variant|MODIFIER|OS01G0118033|OS01G0118033|transcript|OS01T0118033-00|lincRNA||n.-1689_-1688insT|||||1689|,GA|downstream_gene_variant|MODIFIER|OS01G0118000|OS01G0118000|transcript|OS01T0118000-01|protein_coding||c.*359_*360insA|||||171|,GA|downstream_gene_variant|MODIFIER|OS01G0118066|OS01G0118066|transcript|OS01T0118066-01|lincRNA||n.*1818_*1819insT|||||1818|,GA|intergenic_regio…
chr01	1019633	CG	C	2840.86	0/0	0/0	0/0	0/0	1/1	0/0	0/0	1/1	0/0	1/1	0/0	0/0	1/1	0/0	0/0	0/0	0/0	0/0	0/0	1/1	0/0	0/0	0/0	0/0	C|upstream_gene_variant|MODIFIER|OS01G0118033|OS01G0118033|transcript|OS01T0118033-00|lincRNA||n.-1717delC|||||1717|,C|downstream_gene_variant|MODIFIER|OS01G0118000|OS01G0118000|transcript|OS01T0118000-01|protein_coding||c.*388delG|||||199|,C|downstream_gene_variant|MODIFIER|OS01G0118066|OS01G0118066|transcript|OS01T0118066-01|lincRNA||n.*1790delC|||||1790|,C|intergenic_region|MODIFIER|OS01G01180…
chr01	1019944	C	CCTCT	6601.99	0/0	0/0	0/0	0/0	1/1	0/0	0/0	1/1	0/0	1/1	0/0	0/0	1/1	0/0	0/0	0/0	0/0	0/0	0/0	1/1	0/0	0/0	0/0	0/0	CCTCT|downstream_gene_variant|MODIFIER|OS01G0118000|OS01G0118000|transcript|OS01T0118000-01|protein_coding||c.*698_*699insCTCT|||||510|,CCTCT|downstream_gene_variant|MODIFIER|OS01G0118066|OS01G0118066|transcript|OS01T0118066-01|lincRNA||n.*1479_*1480insAGAG|||||1479|,CCTCT|intergenic_region|MODIFIER|OS01G0118000-OS01G0118066|OS01G0118000-OS01G0118066|intergenic_region|OS01G0118000-OS01G0118066|||…
chr01	1026644	AT	A	6264.88	0/0	0/0	0/0	0/0	1/1	0/0	0/0	1/1	0/0	1/1	0/0	0/0	1/1	0/0	0/0	0/0	0/0	0/0	0/0	1/1	0/0	0/0	0/0	0/0	A|upstream_gene_variant|MODIFIER|OS01G0118066|OS01G0118066|transcript|OS01T0118066-01|lincRNA||n.-1112delA|||||1112|,A|intron_variant|MODIFIER|OS01G0118100|OS01G0118100|transcript|OS01T0118100-01|protein_coding|5/12|c.919-77delT||||||WARNING_TRANSCRIPT_NO_START_CODON
chr01	1028117	T	TA	9233.92	0/0	0/0	0/0	0/0	1/1	0/0	0/0	1/1	0/0	1/1	0/0	0/0	1/1	0/0	0/0	0/0	0/0	0/0	0/0	1/1	0/0	0/0	0/0	0/0	TA|intron_variant|MODIFIER|OS01G0118100|OS01G0118100|transcript|OS01T0118100-01|protein_coding|9/12|c.1651-52_1651-51insA||||||WARNING_TRANSCRIPT_NO_START_CODON
chr01	1031506	C	CT	1290.83	0/0	0/0	0/0	0/0	0/0	0/0	0/0	0/0	0/0	1/1	0/0	0/0	0/0	0/0	0/0	0/0	0/0	0/0	0/0	1/1	0/0	0/0	0/0	0/0	CT|downstream_gene_variant|MODIFIER|OS01G0118100|OS01G0118100|transcript|OS01T0118100-01|protein_coding||c.*1781_*1782insT|||||1395|WARNING_TRANSCRIPT_NO_START_CODON,CT|downstream_gene_variant|MODIFIER|EPlOSAG00000022452|EPlOSAG00000022452|transcript|EPlOSAT00000023840|lincRNA||n.*1088_*1089insA|||||1088|,CT|downstream_gene_variant|MODIFIER|EPlOSAG00000025847|EPlOSAG00000025847|transcript|EPlOSAT…
chr01	1031556	G	GA	1708.9	0/0	0/0	0/0	0/0	./.	0/0	0/0	1/1	0/0	0/0	0/0	0/0	1/1	0/0	0/0	0/0	0/0	0/0	0/0	1/1	0/0	0/0	0/0	0/0	GA|downstream_gene_variant|MODIFIER|OS01G0118100|OS01G0118100|transcript|OS01T0118100-01|protein_coding||c.*1831_*1832insA|||||1445|WARNING_TRANSCRIPT_NO_START_CODON,GA|downstream_gene_variant|MODIFIER|EPlOSAG00000022452|EPlOSAG00000022452|transcript|EPlOSAT00000023840|lincRNA||n.*1038_*1039insT|||||1038|,GA|downstream_gene_variant|MODIFIER|EPlOSAG00000025847|EPlOSAG00000025847|transcript|EPlOSAT…
chr01	1031595	C	CT	4911.91	0/0	0/0	0/0	0/0	1/1	0/0	0/0	1/1	0/0	1/1	0/0	0/0	1/1	0/0	0/0	0/0	0/0	0/0	0/0	1/1	0/0	0/0	0/0	0/0	CT|downstream_gene_variant|MODIFIER|OS01G0118100|OS01G0118100|transcript|OS01T0118100-01|protein_coding||c.*1870_*1871insT|||||1484|WARNING_TRANSCRIPT_NO_START_CODON,CT|downstream_gene_variant|MODIFIER|EPlOSAG00000022452|EPlOSAG00000022452|transcript|EPlOSAT00000023840|lincRNA||n.*999_*1000insA|||||999|,CT|downstream_gene_variant|MODIFIER|EPlOSAG00000025847|EPlOSAG00000025847|transcript|EPlOSAT00…
chr01	1033186	A	ACCTTAGCTAAGGTAC	69.18	0/0	0/0	0/0	0/0	./.	0/0	0/0	./.	0/0	./.	0/0	0/0	./.	0/0	0/0	0/0	0/0	0/0	0/0	1/1	0/0	0/0	0/0	0/0	ACCTTAGCTAAGGTAC|upstream_gene_variant|MODIFIER|EPlOSAG00000022452|EPlOSAG00000022452|transcript|EPlOSAT00000023840|lincRNA||n.-551_-550insGTACCTTAGCTAAGG|||||551|,ACCTTAGCTAAGGTAC|downstream_gene_variant|MODIFIER|EPlOSAG00000025847|EPlOSAG00000025847|transcript|EPlOSAT00000027235|lincRNA||n.*43_*44insGTACCTTAGCTAAGG|||||43|,ACCTTAGCTAAGGTAC|intergenic_region|MODIFIER|EPlOSAG00000022452-EPlOSAG00…
chr01	1033599	CCT	C	11026.9	0/0	0/0	0/0	0/0	1/1	0/0	0/0	1/1	0/0	1/1	0/0	0/0	1/1	0/0	0/0	0/0	0/0	0/0	0/0	1/1	0/0	0/0	0/0	0/0	C|upstream_gene_variant|MODIFIER|EPlOSAG00000022452|EPlOSAG00000022452|transcript|EPlOSAT00000023840|lincRNA||n.-965_-964delAG|||||964|,C|upstream_gene_variant|MODIFIER|EPlOSAG00000025847|EPlOSAG00000025847|transcript|EPlOSAT00000027235|lincRNA||n.-316_-315delAG|||||315|,C|intergenic_region|MODIFIER|EPlOSAG00000025847-EPlOSAG00000028190|EPlOSAG00000025847-EPlOSAG00000028190|intergenic_region|EPlO…
chr01	1033836	AG	A	7122.88	0/0	0/0	0/0	0/0	1/1	0/0	0/0	1/1	0/0	1/1	0/0	0/0	1/1	0/0	0/0	0/0	0/0	0/0	0/0	1/1	0/0	0/0	0/0	0/0	A|upstream_gene_variant|MODIFIER|EPlOSAG00000022452|EPlOSAG00000022452|transcript|EPlOSAT00000023840|lincRNA||n.-1201delC|||||1201|,A|upstream_gene_variant|MODIFIER|EPlOSAG00000025847|EPlOSAG00000025847|transcript|EPlOSAT00000027235|lincRNA||n.-552delC|||||552|,A|intergenic_region|MODIFIER|EPlOSAG00000025847-EPlOSAG00000028190|EPlOSAG00000025847-EPlOSAG00000028190|intergenic_region|EPlOSAG0000002…
chr01	1033976	A	AC	9557.92	0/0	0/0	0/0	0/0	1/1	0/0	0/0	1/1	0/0	1/1	0/0	0/0	1/1	0/0	0/0	0/0	0/0	0/0	0/0	1/1	0/0	0/0	0/0	0/0	AC|upstream_gene_variant|MODIFIER|EPlOSAG00000022452|EPlOSAG00000022452|transcript|EPlOSAT00000023840|lincRNA||n.-1341_-1340insG|||||1341|,AC|upstream_gene_variant|MODIFIER|EPlOSAG00000025847|EPlOSAG00000025847|transcript|EPlOSAT00000027235|lincRNA||n.-692_-691insG|||||692|,AC|intergenic_region|MODIFIER|EPlOSAG00000025847-EPlOSAG00000028190|EPlOSAG00000025847-EPlOSAG00000028190|intergenic_region|…
chr01	1034233	G	GT	6577.98	0/0	0/0	0/0	0/0	1/1	0/0	./.	1/1	0/0	./.	0/0	0/0	1/1	0/0	0/0	0/0	0/0	0/0	0/0	1/1	0/0	0/0	0/0	0/0	GT|upstream_gene_variant|MODIFIER|EPlOSAG00000022452|EPlOSAG00000022452|transcript|EPlOSAT00000023840|lincRNA||n.-1598_-1597insA|||||1598|,GT|upstream_gene_variant|MODIFIER|EPlOSAG00000025847|EPlOSAG00000025847|transcript|EPlOSAT00000027235|lincRNA||n.-949_-948insA|||||949|,GT|intergenic_region|MODIFIER|EPlOSAG00000025847-EPlOSAG00000028190|EPlOSAG00000025847-EPlOSAG00000028190|intergenic_region|…
chr01	1034556	G	GA	9823.92	0/0	0/0	0/0	0/0	1|1	0/0	0/0	1|1	0/0	1|1	0/0	0/0	1|1	0/0	0/0	0/0	0/0	0/0	0/0	1|1	0/0	0/0	0/0	0/0	GA|upstream_gene_variant|MODIFIER|EPlOSAG00000022452|EPlOSAG00000022452|transcript|EPlOSAT00000023840|lincRNA||n.-1921_-1920insT|||||1921|,GA|upstream_gene_variant|MODIFIER|EPlOSAG00000025847|EPlOSAG00000025847|transcript|EPlOSAT00000027235|lincRNA||n.-1272_-1271insT|||||1272|,GA|intergenic_region|MODIFIER|EPlOSAG00000025847-EPlOSAG00000028190|EPlOSAG00000025847-EPlOSAG00000028190|intergenic_regi…
chr01	1035020	TGAA	T	2991.86	0/0	0/0	0/0	0/0	1|1	0/0	0/0	1|1	0/0	1|1	0/0	0/0	1|1	0/0	0/0	0/0	0/0	0/0	0/0	1|1	0/0	0/0	0/0	0/0	T|upstream_gene_variant|MODIFIER|EPlOSAG00000025847|EPlOSAG00000025847|transcript|EPlOSAT00000027235|lincRNA||n.-1738_-1736delTTC|||||1736|,T|upstream_gene_variant|MODIFIER|EPlOSAG00000028190|EPlOSAG00000028190|transcript|EPlOSAT00000029578|lincRNA||n.-1853_-1851delGAA|||||1853|,T|intergenic_region|MODIFIER|EPlOSAG00000025847-EPlOSAG00000028190|EPlOSAG00000025847-EPlOSAG00000028190|intergenic_reg…
chr01	1035024	TG	T	3036.86	0/0	0/0	0/0	0/0	1|1	0/0	0/0	1|1	0/0	1|1	0/0	0/0	1|1	0/0	0/0	0/0	0/0	0/0	0/0	1|1	0/0	0/0	0/0	0/0	T|upstream_gene_variant|MODIFIER|EPlOSAG00000025847|EPlOSAG00000025847|transcript|EPlOSAT00000027235|lincRNA||n.-1740delC|||||1740|,T|upstream_gene_variant|MODIFIER|EPlOSAG00000028190|EPlOSAG00000028190|transcript|EPlOSAT00000029578|lincRNA||n.-1849delG|||||1849|,T|intergenic_region|MODIFIER|EPlOSAG00000025847-EPlOSAG00000028190|EPlOSAG00000025847-EPlOSAG00000028190|intergenic_region|EPlOSAG00000…
chr01	1035236	A	AGGG	4082.87	0/0	0/0	0/0	0/0	1|1	0/0	0/0	1|1	0/0	1|1	0/0	0/0	1|1	0/0	0/0	0/0	0/0	0/0	0/0	1|1	0/0	0/0	0/0	0/0	AGGG|upstream_gene_variant|MODIFIER|EPlOSAG00000025847|EPlOSAG00000025847|transcript|EPlOSAT00000027235|lincRNA||n.-1952_-1951insCCC|||||1952|,AGGG|upstream_gene_variant|MODIFIER|EPlOSAG00000028190|EPlOSAG00000028190|transcript|EPlOSAT00000029578|lincRNA||n.-1638_-1637insGGG|||||1637|,AGGG|intergenic_region|MODIFIER|EPlOSAG00000025847-EPlOSAG00000028190|EPlOSAG00000025847-EPlOSAG00000028190|inter…
chr01	1035237	A	AGTAC	4082.88	0/0	0/0	0/0	0/0	1|1	0/0	0/0	1|1	0/0	1|1	0/0	0/0	1|1	0/0	0/0	0/0	0/0	0/0	0/0	1|1	0/0	0/0	0/0	0/0	AGTAC|upstream_gene_variant|MODIFIER|EPlOSAG00000025847|EPlOSAG00000025847|transcript|EPlOSAT00000027235|lincRNA||n.-1953_-1952insGTAC|||||1953|,AGTAC|upstream_gene_variant|MODIFIER|EPlOSAG00000028190|EPlOSAG00000028190|transcript|EPlOSAT00000029578|lincRNA||n.-1637_-1636insGTAC|||||1636|,AGTAC|intergenic_region|MODIFIER|EPlOSAG00000025847-EPlOSAG00000028190|EPlOSAG00000025847-EPlOSAG00000028190|…
chr01	1035440	T	TA	6749.92	0/0	0/0	0/0	0/0	1/1	0/0	0/0	1|1	0/0	1/1	0/0	0/0	1/1	0/0	0/0	0/0	0/0	0/0	0/0	1/1	0/0	0/0	0/0	0/0	TA|upstream_gene_variant|MODIFIER|EPlOSAG00000028190|EPlOSAG00000028190|transcript|EPlOSAT00000029578|lincRNA||n.-1434_-1433insA|||||1433|,TA|intergenic_region|MODIFIER|EPlOSAG00000025847-EPlOSAG00000028190|EPlOSAG00000025847-EPlOSAG00000028190|intergenic_region|EPlOSAG00000025847-EPlOSAG00000028190|||n.1035440_1035441insA||||||
chr01	1039484	T	TA	5136.92	0/0	0/0	0/0	0/0	1/1	0/0	0/0	1/1	0/0	1/1	0/0	0/0	1/1	0/0	0/0	0/0	0/0	0/0	0/0	1/1	0/0	0/0	0/0	0/0	TA|upstream_gene_variant|MODIFIER|EPlOSAG00000038489|EPlOSAG00000038489|transcript|EPlOSAT00000039877|lincRNA||n.-46_-45insA|||||45|,TA|upstream_gene_variant|MODIFIER|EPlOSAG00000009454|EPlOSAG00000009454|transcript|EPlOSAT00000010842|lincRNA||n.-1049_-1048insA|||||1048|,TA|downstream_gene_variant|MODIFIER|EPlOSAG00000038297|EPlOSAG00000038297|transcript|EPlOSAT00000039685|lincRNA||n.*45_*46insT|…
chr01	1041579	AAAAAT	A	940.06	0/0	0/0	0/0	0/0	0/0	0/0	0/0	1/1	0/0	0/0	0/0	0/0	0/0	0/0	0/0	0/0	0/0	0/0	0/0	0/0	0/0	0/0	0/0	0/0	A|upstream_gene_variant|MODIFIER|EPlOSAG00000038297|EPlOSAG00000038297|transcript|EPlOSAT00000039685|lincRNA||n.-1903_-1899delATTTT|||||1899|,A|upstream_gene_variant|MODIFIER|EPlOSAG00000021852|EPlOSAG00000021852|transcript|EPlOSAT00000023240|lincRNA||n.-190_-186delATTTT|||||186|,A|downstream_gene_variant|MODIFIER|EPlOSAG00000038489|EPlOSAG00000038489|transcript|EPlOSAT00000039877|lincRNA||n.*189…
chr01	1041580	AAAAT	*,A	1726.04	0/0	0/0	0/0	0/0	./.	0/0	0/0	1/1	0/0	0/0	0/0	0/0	2/2	0/0	0/0	0/0	0/0	0/0	0/0	0/0	0/0	0/0	0/0	0/0	A|upstream_gene_variant|MODIFIER|EPlOSAG00000038297|EPlOSAG00000038297|transcript|EPlOSAT00000039685|lincRNA||n.-1903_-1900delATTT|||||1900|,A|upstream_gene_variant|MODIFIER|EPlOSAG00000021852|EPlOSAG00000021852|transcript|EPlOSAT00000023240|lincRNA||n.-190_-187delATTT|||||187|,A|downstream_gene_variant|MODIFIER|EPlOSAG00000038489|EPlOSAG00000038489|transcript|EPlOSAT00000039877|lincRNA||n.*1900_…
chr01	1041581	AAAT	*,A	2136.98	0/0	0/0	0/0	0/0	./.	0/0	0/0	1/1	0/0	2/2	0/0	0/0	1/1	0/0	0/0	0/0	0/0	0/0	0/0	./.	0/0	0/0	0/0	0/0	A|upstream_gene_variant|MODIFIER|EPlOSAG00000038297|EPlOSAG00000038297|transcript|EPlOSAT00000039685|lincRNA||n.-1903_-1901delATT|||||1901|,A|upstream_gene_variant|MODIFIER|EPlOSAG00000021852|EPlOSAG00000021852|transcript|EPlOSAT00000023240|lincRNA||n.-190_-188delATT|||||188|,A|downstream_gene_variant|MODIFIER|EPlOSAG00000038489|EPlOSAG00000038489|transcript|EPlOSAT00000039877|lincRNA||n.*1901_*1…
chr01	1044638	TTA	T	12043.9	0/0	0/0	0/0	0/0	1/1	0/0	0/0	1/1	0/0	1/1	0/0	0/0	1/1	0/0	0/0	0/0	0/0	0/0	0/0	1/1	0/0	0/0	0/0	0/0	T|upstream_gene_variant|MODIFIER|OS01G0118300|OS01G0118300|transcript|OS01T0118300-01|protein_coding||c.-3337_-3336delTA|||||1965|,T|downstream_gene_variant|MODIFIER|EPlOSAG00000049573|EPlOSAG00000049573|transcript|EPlOSAT00000050961|lincRNA||n.*1767_*1768delTA|||||1768|,T|intergenic_region|MODIFIER|EPlOSAG00000021852-EPlOSAG00000049573|EPlOSAG00000021852-EPlOSAG00000049573|intergenic_region|EPlO…
chr01	1045123	A	ATT	10036.9	0/0	0/0	0/0	0/0	1|1	0/0	0/0	1|1	0/0	1|1	0/0	0/0	1|1	0/0	0/0	0/0	0/0	0/0	0/0	1|1	0/0	0/0	0/0	0/0	ATT|upstream_gene_variant|MODIFIER|OS01G0118300|OS01G0118300|transcript|OS01T0118300-01|protein_coding||c.-2853_-2852insTT|||||1480|,ATT|downstream_gene_variant|MODIFIER|EPlOSAG00000049573|EPlOSAG00000049573|transcript|EPlOSAT00000050961|lincRNA||n.*1283_*1284insAA|||||1283|,ATT|intergenic_region|MODIFIER|EPlOSAG00000021852-EPlOSAG00000049573|EPlOSAG00000021852-EPlOSAG00000049573|intergenic_regio…
chr01	1045263	T	TGAGTCATCCCTTAAAAA	9898.92	0/0	0/0	0/0	0/0	1|1	0/0	0/0	1|1	0/0	1|1	0/0	0/0	1|1	0/0	0/0	0/0	0/0	0/0	0/0	1|1	0/0	0/0	0/0	0/0	TGAGTCATCCCTTAAAAA|upstream_gene_variant|MODIFIER|OS01G0118300|OS01G0118300|transcript|OS01T0118300-01|protein_coding||c.-2713_-2712insGAGTCATCCCTTAAAAA|||||1340|,TGAGTCATCCCTTAAAAA|downstream_gene_variant|MODIFIER|EPlOSAG00000049573|EPlOSAG00000049573|transcript|EPlOSAT00000050961|lincRNA||n.*1143_*1144insTTTTTAAGGGATGACTC|||||1143|,TGAGTCATCCCTTAAAAA|intergenic_region|MODIFIER|EPlOSAG0000002185…
chr01	1045414	TAA	T	11072.9	0/0	0/0	0/0	0/0	1|1	0/0	0/0	1|1	0/0	1|1	0/0	0/0	1|1	0/0	0/0	0/0	0/0	0/0	0/0	1|1	0/0	0/0	0/0	0/0	T|upstream_gene_variant|MODIFIER|OS01G0118300|OS01G0118300|transcript|OS01T0118300-01|protein_coding||c.-2561_-2560delAA|||||1189|,T|downstream_gene_variant|MODIFIER|EPlOSAG00000049573|EPlOSAG00000049573|transcript|EPlOSAT00000050961|lincRNA||n.*991_*992delTT|||||992|,T|intergenic_region|MODIFIER|EPlOSAG00000021852-EPlOSAG00000049573|EPlOSAG00000021852-EPlOSAG00000049573|intergenic_region|EPlOSAG…
chr01	1045418	TTTTTAA	T	11264.9	0/0	0/0	0/0	0/0	1|1	0/0	0/0	1|1	0/0	1|1	0/0	0/0	1|1	0/0	0/0	0/0	0/0	0/0	0/0	1|1	0/0	0/0	0/0	0/0	T|upstream_gene_variant|MODIFIER|OS01G0118300|OS01G0118300|transcript|OS01T0118300-01|protein_coding||c.-2557_-2552delTTTTAA|||||1185|,T|downstream_gene_variant|MODIFIER|EPlOSAG00000049573|EPlOSAG00000049573|transcript|EPlOSAT00000050961|lincRNA||n.*983_*988delTTAAAA|||||988|,T|intergenic_region|MODIFIER|EPlOSAG00000021852-EPlOSAG00000049573|EPlOSAG00000021852-EPlOSAG00000049573|intergenic_region…
chr01	1045591	GTTCAATCATTGGT	G	5991.88	0/0	0/0	0/0	0/0	1|1	0/0	0/0	1|1	0/0	1|1	0/0	0/0	1|1	0/0	0/0	0/0	0/0	0/0	0/0	1|1	0/0	0/0	0/0	0/0	G|upstream_gene_variant|MODIFIER|OS01G0118300|OS01G0118300|transcript|OS01T0118300-01|protein_coding||c.-2384_-2372delTTCAATCATTGGT|||||1012|,G|downstream_gene_variant|MODIFIER|EPlOSAG00000049573|EPlOSAG00000049573|transcript|EPlOSAT00000050961|lincRNA||n.*803_*815delACCAATGATTGAA|||||815|,G|intergenic_region|MODIFIER|EPlOSAG00000021852-EPlOSAG00000049573|EPlOSAG00000021852-EPlOSAG00000049573|int…
chr01	1045654	GATGT	G	5850.88	0/0	0/0	0/0	0/0	1|1	0/0	0/0	1|1	0/0	1|1	0/0	0/0	1|1	0/0	0/0	0/0	0/0	0/0	0/0	1|1	0/0	0/0	0/0	0/0	G|upstream_gene_variant|MODIFIER|OS01G0118300|OS01G0118300|transcript|OS01T0118300-01|protein_coding||c.-2321_-2318delATGT|||||949|,G|downstream_gene_variant|MODIFIER|EPlOSAG00000049573|EPlOSAG00000049573|transcript|EPlOSAT00000050961|lincRNA||n.*749_*752delACAT|||||752|,G|intergenic_region|MODIFIER|EPlOSAG00000021852-EPlOSAG00000049573|EPlOSAG00000021852-EPlOSAG00000049573|intergenic_region|EPlO…
chr01	1045852	CTA	C	4718.88	0/0	0/0	0/0	0/0	1|1	0/0	0/0	1|1	0/0	1|1	0/0	0/0	1|1	0/0	0/0	0/0	0/0	0/0	0/0	1|1	0/0	0/0	0/0	0/0	C|upstream_gene_variant|MODIFIER|OS01G0118300|OS01G0118300|transcript|OS01T0118300-01|protein_coding||c.-2123_-2122delTA|||||751|,C|downstream_gene_variant|MODIFIER|EPlOSAG00000049573|EPlOSAG00000049573|transcript|EPlOSAT00000050961|lincRNA||n.*553_*554delTA|||||554|,C|downstream_gene_variant|MODIFIER|OS01G0118350|OS01G0118350|transcript|OS01T0118350-00|lincRNA||n.*1893_*1894delTA|||||1894|,C|int…
chr01	1045855	CT	C	4701.88	0/0	0/0	0/0	0/0	1|1	0/0	0/0	1|1	0/0	1|1	0/0	0/0	1|1	0/0	0/0	0/0	0/0	0/0	0/0	1|1	0/0	0/0	0/0	0/0	C|upstream_gene_variant|MODIFIER|OS01G0118300|OS01G0118300|transcript|OS01T0118300-01|protein_coding||c.-2120delT|||||748|,C|downstream_gene_variant|MODIFIER|EPlOSAG00000049573|EPlOSAG00000049573|transcript|EPlOSAT00000050961|lincRNA||n.*551delA|||||551|,C|downstream_gene_variant|MODIFIER|OS01G0118350|OS01G0118350|transcript|OS01T0118350-00|lincRNA||n.*1891delA|||||1891|,C|intergenic_region|MODIF…
chr01	1045871	G	GCATTAA	4873.84	0/0	0/0	0/0	0/0	1|1	0/0	0/0	1|1	0/0	1|1	0/0	0/0	1|1	0/0	0/0	0/0	0/0	0/0	0/0	1|1	0/0	0/0	0/0	0/0	GCATTAA|upstream_gene_variant|MODIFIER|OS01G0118300|OS01G0118300|transcript|OS01T0118300-01|protein_coding||c.-2105_-2104insCATTAA|||||732|,GCATTAA|downstream_gene_variant|MODIFIER|EPlOSAG00000049573|EPlOSAG00000049573|transcript|EPlOSAT00000050961|lincRNA||n.*535_*536insTTAATG|||||535|,GCATTAA|downstream_gene_variant|MODIFIER|OS01G0118350|OS01G0118350|transcript|OS01T0118350-00|lincRNA||n.*1875_…
chr01	1045960	T	TTAC	6795.84	0/0	0/0	0/0	0/0	1|1	0/0	0/0	1|1	0/0	1|1	0/0	0/0	1|1	0/0	0/0	0/0	0/0	0/0	0/0	1|1	0/0	0/0	0/0	0/0	TTAC|upstream_gene_variant|MODIFIER|OS01G0118300|OS01G0118300|transcript|OS01T0118300-01|protein_coding||c.-2016_-2015insTAC|||||643|,TTAC|downstream_gene_variant|MODIFIER|EPlOSAG00000049573|EPlOSAG00000049573|transcript|EPlOSAT00000050961|lincRNA||n.*446_*447insGTA|||||446|,TTAC|downstream_gene_variant|MODIFIER|OS01G0118350|OS01G0118350|transcript|OS01T0118350-00|lincRNA||n.*1786_*1787insGTA||||…
chr01	1045985	T	TAC	6951.92	0/0	0/0	0/0	0/0	1|1	0/0	0/0	1|1	0/0	1|1	0/0	0/0	1|1	0/0	0/0	0/0	0/0	0/0	0/0	1|1	0/0	0/0	0/0	0/0	TAC|upstream_gene_variant|MODIFIER|OS01G0118300|OS01G0118300|transcript|OS01T0118300-01|protein_coding||c.-1991_-1990insAC|||||618|,TAC|downstream_gene_variant|MODIFIER|EPlOSAG00000049573|EPlOSAG00000049573|transcript|EPlOSAT00000050961|lincRNA||n.*421_*422insGT|||||421|,TAC|downstream_gene_variant|MODIFIER|OS01G0118350|OS01G0118350|transcript|OS01T0118350-00|lincRNA||n.*1761_*1762insGT|||||1761|…
chr01	1045986	T	TTA	6816.92	0/0	0/0	0/0	0/0	1|1	0/0	0/0	1|1	0/0	1|1	0/0	0/0	1|1	0/0	0/0	0/0	0/0	0/0	0/0	1|1	0/0	0/0	0/0	0/0	TTA|upstream_gene_variant|MODIFIER|OS01G0118300|OS01G0118300|transcript|OS01T0118300-01|protein_coding||c.-1990_-1989insTA|||||617|,TTA|downstream_gene_variant|MODIFIER|EPlOSAG00000049573|EPlOSAG00000049573|transcript|EPlOSAT00000050961|lincRNA||n.*420_*421insTA|||||420|,TTA|downstream_gene_variant|MODIFIER|OS01G0118350|OS01G0118350|transcript|OS01T0118350-00|lincRNA||n.*1760_*1761insTA|||||1760|…
chr01	1045991	G	GGATTTACTCGC	8616.92	0/0	0/0	0/0	0/0	1|1	0/0	0/0	1|1	0/0	1|1	0/0	0/0	1|1	0/0	0/0	0/0	0/0	0/0	0/0	1|1	0/0	0/0	0/0	0/0	GGATTTACTCGC|upstream_gene_variant|MODIFIER|OS01G0118300|OS01G0118300|transcript|OS01T0118300-01|protein_coding||c.-1985_-1984insGATTTACTCGC|||||612|,GGATTTACTCGC|downstream_gene_variant|MODIFIER|EPlOSAG00000049573|EPlOSAG00000049573|transcript|EPlOSAT00000050961|lincRNA||n.*415_*416insGCGAGTAAATC|||||415|,GGATTTACTCGC|downstream_gene_variant|MODIFIER|OS01G0118350|OS01G0118350|transcript|OS01T011…
chr01	1046136	G	GT	4780.92	0/0	0/0	0/0	0/0	1/1	0/0	0/0	1/1	0/0	1/1	0/0	0/0	1/1	0/0	0/0	0/0	0/0	0/0	0/0	1/1	0/0	0/0	0/0	0/0	GT|upstream_gene_variant|MODIFIER|OS01G0118300|OS01G0118300|transcript|OS01T0118300-01|protein_coding||c.-1840_-1839insT|||||467|,GT|downstream_gene_variant|MODIFIER|EPlOSAG00000049573|EPlOSAG00000049573|transcript|EPlOSAT00000050961|lincRNA||n.*270_*271insA|||||270|,GT|downstream_gene_variant|MODIFIER|OS01G0118350|OS01G0118350|transcript|OS01T0118350-00|lincRNA||n.*1610_*1611insA|||||1610|,GT|in…
chr01	1046255	TATCATC	T	5122.88	0/0	0/0	0/0	0/0	1|1	0/0	0/0	1|1	0/0	1|1	0/0	0/0	1|1	0/0	0/0	0/0	0/0	0/0	0/0	1|1	0/0	0/0	0/0	0/0	T|upstream_gene_variant|MODIFIER|OS01G0118300|OS01G0118300|transcript|OS01T0118300-01|protein_coding||c.-1720_-1715delATCATC|||||348|,T|downstream_gene_variant|MODIFIER|EPlOSAG00000049573|EPlOSAG00000049573|transcript|EPlOSAT00000050961|lincRNA||n.*146_*151delGATGAT|||||151|,T|downstream_gene_variant|MODIFIER|OS01G0118350|OS01G0118350|transcript|OS01T0118350-00|lincRNA||n.*1486_*1491delGATGAT||||…
chr01	1046316	T	TTC	230.47	0/0	0/0	0/0	0/0	0/0	0/0	0/0	1/1	0/0	0/0	0/0	0/0	./.	0/0	0/0	0/0	0/0	0/0	0/0	0/0	0/0	0/0	0/0	0/0	TTC|upstream_gene_variant|MODIFIER|OS01G0118300|OS01G0118300|transcript|OS01T0118300-01|protein_coding||c.-1660_-1659insTC|||||287|,TTC|downstream_gene_variant|MODIFIER|EPlOSAG00000049573|EPlOSAG00000049573|transcript|EPlOSAT00000050961|lincRNA||n.*90_*91insGA|||||90|,TTC|downstream_gene_variant|MODIFIER|OS01G0118350|OS01G0118350|transcript|OS01T0118350-00|lincRNA||n.*1430_*1431insGA|||||1430|,TT…
chr01	1046341	TC	T	1512.86	0/0	0/0	0/0	0/0	1/1	0/0	0/0	1/1	0/0	1/1	0/0	0/0	./.	0/0	0/0	0/0	0/0	0/0	0/0	./.	0/0	0/0	0/0	0/0	T|upstream_gene_variant|MODIFIER|OS01G0118300|OS01G0118300|transcript|OS01T0118300-01|protein_coding||c.-1634delC|||||262|,T|downstream_gene_variant|MODIFIER|EPlOSAG00000049573|EPlOSAG00000049573|transcript|EPlOSAT00000050961|lincRNA||n.*65delG|||||65|,T|downstream_gene_variant|MODIFIER|OS01G0118350|OS01G0118350|transcript|OS01T0118350-00|lincRNA||n.*1405delG|||||1405|,T|intergenic_region|MODIFIE…
chr01	1046370	TTG	T	4431.88	0/0	0/0	0/0	0/0	1|1	0/0	0/0	1|1	0/0	1|1	0/0	0/0	1|1	0/0	0/0	0/0	0/0	0/0	0/0	1|1	0/0	0/0	0/0	0/0	T|upstream_gene_variant|MODIFIER|OS01G0118300|OS01G0118300|transcript|OS01T0118300-01|protein_coding||c.-1605_-1604delTG|||||233|,T|downstream_gene_variant|MODIFIER|EPlOSAG00000049573|EPlOSAG00000049573|transcript|EPlOSAT00000050961|lincRNA||n.*35_*36delCA|||||36|,T|downstream_gene_variant|MODIFIER|OS01G0118350|OS01G0118350|transcript|OS01T0118350-00|lincRNA||n.*1375_*1376delCA|||||1376|,T|interg…
chr01	1046382	ACG	A	4791.88	0/0	0/0	0/0	0/0	1|1	0/0	0/0	1|1	0/0	1|1	0/0	0/0	1|1	0/0	0/0	0/0	0/0	0/0	0/0	1|1	0/0	0/0	0/0	0/0	A|upstream_gene_variant|MODIFIER|OS01G0118300|OS01G0118300|transcript|OS01T0118300-01|protein_coding||c.-1593_-1592delCG|||||221|,A|downstream_gene_variant|MODIFIER|EPlOSAG00000049573|EPlOSAG00000049573|transcript|EPlOSAT00000050961|lincRNA||n.*23_*24delCG|||||24|,A|downstream_gene_variant|MODIFIER|OS01G0118350|OS01G0118350|transcript|OS01T0118350-00|lincRNA||n.*1363_*1364delCG|||||1364|,A|interg…
chr01	1046388	A	ACGCG	5376.92	0/0	0/0	0/0	0/0	1|1	0/0	0/0	1|1	0/0	1|1	0/0	0/0	1|1	0/0	0/0	0/0	0/0	0/0	0/0	1|1	0/0	0/0	0/0	0/0	ACGCG|upstream_gene_variant|MODIFIER|OS01G0118300|OS01G0118300|transcript|OS01T0118300-01|protein_coding||c.-1588_-1587insCGCG|||||215|,ACGCG|downstream_gene_variant|MODIFIER|EPlOSAG00000049573|EPlOSAG00000049573|transcript|EPlOSAT00000050961|lincRNA||n.*18_*19insCGCG|||||18|,ACGCG|downstream_gene_variant|MODIFIER|OS01G0118350|OS01G0118350|transcript|OS01T0118350-00|lincRNA||n.*1358_*1359insCGCG|…
chr01	1046428	A	AAGG	6491.92	0/0	0/0	0/0	0/0	1/1	0/0	0/0	1/1	0/0	1/1	0/0	0/0	1/1	0/0	0/0	0/0	0/0	0/0	0/0	1/1	0/0	0/0	0/0	0/0	AAGG|upstream_gene_variant|MODIFIER|OS01G0118300|OS01G0118300|transcript|OS01T0118300-01|protein_coding||c.-1548_-1547insAGG|||||175|,AAGG|downstream_gene_variant|MODIFIER|OS01G0118350|OS01G0118350|transcript|OS01T0118350-00|lincRNA||n.*1316_*1318dupCCT|||||1318|,AAGG|non_coding_transcript_exon_variant|MODIFIER|EPlOSAG00000049573|EPlOSAG00000049573|transcript|EPlOSAT00000050961|lincRNA|1/1|n.159_…
chr01	1047385	GT	G	6420.88	0/0	0/0	0/0	0/0	1/1	0/0	0/0	1/1	0/0	1/1	0/0	0/0	1/1	0/0	0/0	0/0	0/0	0/0	0/0	1/1	0/0	0/0	0/0	0/0	G|5_prime_UTR_variant|MODIFIER|OS01G0118300|OS01G0118300|transcript|OS01T0118300-01|protein_coding|1/12|c.-582delT|||||582|INFO_REALIGN_3_PRIME,G|upstream_gene_variant|MODIFIER|EPlOSAG00000049573|EPlOSAG00000049573|transcript|EPlOSAT00000050961|lincRNA||n.-797delA|||||797|,G|downstream_gene_variant|MODIFIER|OS01G0118350|OS01G0118350|transcript|OS01T0118350-00|lincRNA||n.*361delA|||||361|
chr01	1048162	A	ATT	8165.92	0/0	0/0	0/0	0/0	1/1	0/0	0/0	1/1	0/0	1/1	0/0	0/0	1/1	0/0	0/0	0/0	0/0	0/0	0/0	1/1	0/0	0/0	0/0	0/0	ATT|upstream_gene_variant|MODIFIER|EPlOSAG00000049573|EPlOSAG00000049573|transcript|EPlOSAT00000050961|lincRNA||n.-1574_-1573insAA|||||1574|,ATT|intron_variant|MODIFIER|OS01G0118300|OS01G0118300|transcript|OS01T0118300-01|protein_coding|1/11|c.161+26_161+27insTT||||||,ATT|intron_variant|MODIFIER|OS01G0118350|OS01G0118350|transcript|OS01T0118350-00|lincRNA|10/10|n.1013-36_1013-35insAA||||||
chr01	1048729	T	TTGACA	11047.9	0/0	0/0	0/0	0/0	1/1	0/0	0/0	1/1	0/0	1/1	0/0	0/0	1/1	0/0	0/0	0/0	0/0	0/0	0/0	1/1	0/0	0/0	0/0	0/0	TTGACA|splice_region_variant&intron_variant|LOW|OS01G0118300|OS01G0118300|transcript|OS01T0118300-01|protein_coding|2/11|c.228-7_228-6insTGACA||||||,TTGACA|splice_region_variant&intron_variant|LOW|OS01G0118350|OS01G0118350|transcript|OS01T0118350-00|lincRNA|9/10|n.936+4_936+5insTGTCA||||||
chr01	1066065	C	CA	3005.76	0/0	0/0	0/0	0/0	1/1	0/0	0/0	1/1	0/0	0/0	0/0	0/0	1/1	0/0	0/0	0/0	0/0	0/0	0/0	0/0	0/0	0/0	0/0	0/0	CA|downstream_gene_variant|MODIFIER|OS01G0118600|OS01G0118600|transcript|OS01T0118600-00|protein_coding||c.*612_*613insT|||||612|,CA|intergenic_region|MODIFIER|OS01G0118400-OS01G0118600|OS01G0118400-OS01G0118600|intergenic_region|OS01G0118400-OS01G0118600|||n.1066065_1066066insA||||||
chr01	1069144	TG	T,TGG	5617.8	0/0	0/0	0/0	0/0	1/1	0/0	2/2	1/1	0/0	2/2	0/0	0/0	1/1	0/0	0/0	0/0	0/0	0/0	0/0	./.	0/0	0/0	0/0	0/0	T|intron_variant|MODIFIER|OS01G0118600|OS01G0118600|transcript|OS01T0118600-00|protein_coding|2/3|c.328+68delC||||||,TGG|intron_variant|MODIFIER|OS01G0118600|OS01G0118600|transcript|OS01T0118600-00|protein_coding|2/3|c.328+67_328+68insC||||||
chr01	1072385	CA	C	5134.85	./.	./.	0/0	./.	1/1	0/0	0/0	1/1	0/0	1/1	./.	0/0	1/1	0/0	0/0	0/0	0/0	0/0	0/0	1/1	./.	0/0	0/0	0/0	C|3_prime_UTR_variant|MODIFIER|OS01G0118700|OS01G0118700|transcript|OS01T0118700-01|protein_coding|4/4|c.*63delT|||||63|
chr01	1074463	C	CA	5107.92	0/0	0/0	0/0	0/0	1/1	0/0	0/0	1/1	0/0	1/1	0/0	0/0	1/1	0/0	0/0	0/0	0/0	0/0	0/0	1/1	0/0	0/0	0/0	0/0	CA|intron_variant|MODIFIER|OS01G0118700|OS01G0118700|transcript|OS01T0118700-01|protein_coding|1/3|c.145+178_145+179insT||||||
chr01	1075137	AT	A	2563.74	0/0	0/0	0/0	0/0	1/1	0/0	0/0	1/1	0/0	0/0	0/0	0/0	1/1	0/0	0/0	0/0	0/0	0/0	0/0	0/0	0/0	0/0	0/0	0/0	A|upstream_gene_variant|MODIFIER|OS01G0118700|OS01G0118700|transcript|OS01T0118700-01|protein_coding||c.-352delA|||||309|,A|intergenic_region|MODIFIER|OS01G0118700-OS01G0119000|OS01G0118700-OS01G0119000|intergenic_region|OS01G0118700-OS01G0119000|||n.1075138delT||||||
chr01	1077251	A	AT	6436.92	0/0	0/0	0/0	0/0	1/1	0/0	0/0	1/1	0/0	1/1	0/0	0/0	1/1	0/0	0/0	0/0	0/0	0/0	0/0	1/1	0/0	0/0	0/0	0/0	AT|downstream_gene_variant|MODIFIER|OS01G0119000|OS01G0119000|transcript|OS01T0119000-01|protein_coding||c.*1522_*1523insA|||||1313|,AT|downstream_gene_variant|MODIFIER|OS01G0119000|OS01G0119000|transcript|OS01T0119000-02|protein_coding||c.*1522_*1523insA|||||1313|,AT|intergenic_region|MODIFIER|OS01G0118700-OS01G0119000|OS01G0118700-OS01G0119000|intergenic_region|OS01G0118700-OS01G0119000|||n.107…
chr01	1093673	C	CAA,CAAA	5825.55	0/0	0/0	0/0	0/0	1/1	0/0	0/0	1/1	0/0	2/2	0/0	0/0	1/1	0/0	0/0	0/0	0/0	0/0	0/0	./.	0/0	0/0	0/0	0/0	CAA|upstream_gene_variant|MODIFIER|OS01G0119100|OS01G0119100|transcript|OS01T0119100-00|protein_coding||c.-849_-848insTT|||||849|,CAAA|upstream_gene_variant|MODIFIER|OS01G0119100|OS01G0119100|transcript|OS01T0119100-00|protein_coding||c.-849_-848insTTT|||||849|,CAA|upstream_gene_variant|MODIFIER|EPlOSAG00000052690|EPlOSAG00000052690|transcript|EPlOSAT00000000210|lincRNA||n.-1815_-1814insAA|||||18…
chr01	1094648	A	AAC	9014.92	0/0	0/0	0/0	0/0	1/1	0/0	0/0	1/1	0/0	1/1	0/0	0/0	1/1	0/0	0/0	0/0	0/0	0/0	0/0	1/1	0/0	0/0	0/0	0/0	AAC|upstream_gene_variant|MODIFIER|OS01G0119100|OS01G0119100|transcript|OS01T0119100-00|protein_coding||c.-1824_-1823insGT|||||1824|,AAC|upstream_gene_variant|MODIFIER|EPlOSAG00000052690|EPlOSAG00000052690|transcript|EPlOSAT00000000210|lincRNA||n.-840_-839insAC|||||839|,AAC|intergenic_region|MODIFIER|OS01G0119100-EPlOSAG00000052690|OS01G0119100-EPlOSAG00000052690|intergenic_region|OS01G0119100-EP…
chr01	1101842	G	GT	5495.92	0/0	0/0	0/0	0/0	1/1	0/0	0/0	1/1	0/0	1/1	0/0	0/0	1/1	0/0	0/0	0/0	0/0	0/0	0/0	1/1	0/0	0/0	0/0	0/0	GT|upstream_gene_variant|MODIFIER|OS01G0119500|OS01G0119500|transcript|OS01T0119500-01|protein_coding||c.-2030_-2029insT|||||1939|,GT|downstream_gene_variant|MODIFIER|EPlOSAG00000047504|EPlOSAG00000047504|transcript|EPlOSAT00000048892|lincRNA||n.*150_*151insA|||||150|,GT|intergenic_region|MODIFIER|EPlOSAG00000010925-EPlOSAG00000047504|EPlOSAG00000010925-EPlOSAG00000047504|intergenic_region|EPlOSA…
chr01	1111703	TAC	T	6296.88	0/0	0/0	0/0	0/0	1/1	0/0	0/0	1/1	0/0	1/1	0/0	0/0	1/1	0/0	0/0	0/0	0/0	0/0	0/0	1/1	0/0	0/0	0/0	0/0	T|intergenic_region|MODIFIER|OS01G0119500-EPlOSAG00000002948|OS01G0119500-EPlOSAG00000002948|intergenic_region|OS01G0119500-EPlOSAG00000002948|||n.1111704_1111705delAC||||||
chr01	1120553	TG	T	395.24	0/0	0/0	0/0	0/0	./.	0/0	0/0	1/1	0/0	0/0	0/0	0/0	.	0/0	0/0	0|0	0/0	0/0	0/0	0/0	0/0	0/0	0/0	0/0	T|intergenic_region|MODIFIER|EPlOSAG00000002948-OS01G0119800|EPlOSAG00000002948-OS01G0119800|intergenic_region|EPlOSAG00000002948-OS01G0119800|||n.1120554delG||||||
chr01	1136346	TG	T	7893.88	0/0	0/0	0/0	0/0	1/1	0/0	0/0	1/1	0/0	1/1	0/0	0/0	1/1	0/0	0/0	0/0	0/0	0/0	0/0	1/1	0/0	0/0	0/0	0/0	T|intergenic_region|MODIFIER|EPlOSAG00000022835-EPlOSAG00000023848|EPlOSAG00000022835-EPlOSAG00000023848|intergenic_region|EPlOSAG00000022835-EPlOSAG00000023848|||n.1136347delG||||||
chr01	1175267	C	CAAGAG	3797.77	0/0	0/0	0/0	0/0	1|1	0/0	0/0	1|1	0/0	0/0	0/0	0/0	1|1	0/0	0/0	0/0	0/0	0/0	0/0	0/0	0/0	0/0	0/0	0/0	CAAGAG|upstream_gene_variant|MODIFIER|OS01G0120800|OS01G0120800|transcript|OS01T0120800-06|protein_coding||c.-1228_-1227insCTCTT|||||1227|WARNING_TRANSCRIPT_NO_START_CODON,CAAGAG|intron_variant|MODIFIER|OS01G0120800|OS01G0120800|transcript|OS01T0120800-01|protein_coding|8/13|c.1534-94_1534-93insCTCTT||||||,CAAGAG|intron_variant|MODIFIER|OS01G0120800|OS01G0120800|transcript|OS01T0120800-03|protein…
chr01	1175270	TC	T	3498.73	0/0	0/0	0/0	0/0	1|1	0/0	0/0	1|1	0/0	0/0	0/0	0/0	1|1	0/0	0/0	0/0	0/0	0/0	0/0	0/0	0/0	0/0	0/0	0/0	T|upstream_gene_variant|MODIFIER|OS01G0120800|OS01G0120800|transcript|OS01T0120800-06|protein_coding||c.-1231delG|||||1230|WARNING_TRANSCRIPT_NO_START_CODON,T|intron_variant|MODIFIER|OS01G0120800|OS01G0120800|transcript|OS01T0120800-01|protein_coding|8/13|c.1534-97delG||||||,T|intron_variant|MODIFIER|OS01G0120800|OS01G0120800|transcript|OS01T0120800-03|protein_coding|8/13|c.1534-97delG||||||WARNI…
chr01	1175272	TGATATTTGGCA	T	3498.73	0/0	0/0	0/0	0/0	1|1	0/0	0/0	1|1	0/0	0/0	0/0	0/0	1|1	0/0	0/0	0/0	0/0	0/0	0/0	0/0	0/0	0/0	0/0	0/0	T|upstream_gene_variant|MODIFIER|OS01G0120800|OS01G0120800|transcript|OS01T0120800-06|protein_coding||c.-1243_-1233delTGCCAAATATC|||||1232|WARNING_TRANSCRIPT_NO_START_CODON,T|intron_variant|MODIFIER|OS01G0120800|OS01G0120800|transcript|OS01T0120800-01|protein_coding|8/13|c.1534-109_1534-99delTGCCAAATATC||||||,T|intron_variant|MODIFIER|OS01G0120800|OS01G0120800|transcript|OS01T0120800-03|protein_c…
chr01	1175287	AAAGCAAACAAAC	A	3688.73	0/0	0/0	0/0	0/0	1|1	0/0	0/0	1|1	0/0	0/0	0/0	0/0	1|1	0/0	0/0	0/0	0/0	0/0	0/0	0/0	0/0	0/0	0/0	0/0	A|upstream_gene_variant|MODIFIER|OS01G0120800|OS01G0120800|transcript|OS01T0120800-06|protein_coding||c.-1259_-1248delGTTTGTTTGCTT|||||1247|WARNING_TRANSCRIPT_NO_START_CODON,A|intron_variant|MODIFIER|OS01G0120800|OS01G0120800|transcript|OS01T0120800-01|protein_coding|8/13|c.1534-125_1534-114delGTTTGTTTGCTT||||||,A|intron_variant|MODIFIER|OS01G0120800|OS01G0120800|transcript|OS01T0120800-03|protei…
chr01	1175301	AGAACGT	A	3474.73	0/0	0/0	0/0	0/0	1|1	0/0	0/0	1|1	0/0	0/0	0/0	0/0	1|1	0/0	0/0	0/0	0/0	0/0	0/0	0/0	0/0	0/0	0/0	0/0	A|upstream_gene_variant|MODIFIER|OS01G0120800|OS01G0120800|transcript|OS01T0120800-06|protein_coding||c.-1267_-1262delACGTTC|||||1261|WARNING_TRANSCRIPT_NO_START_CODON,A|intron_variant|MODIFIER|OS01G0120800|OS01G0120800|transcript|OS01T0120800-01|protein_coding|8/13|c.1534-133_1534-128delACGTTC||||||,A|intron_variant|MODIFIER|OS01G0120800|OS01G0120800|transcript|OS01T0120800-03|protein_coding|8/1…
chr01	1189429	G	GA	7232.79	./.	0/0	0/0	0/0	0/0	0/0	0/0	0/0	0/0	1/1	0/0	0/0	0/0	1/1	0/0	0/0	0/0	0/0	0/0	1/1	1/1	0/0	0/0	0/0	GA|downstream_gene_variant|MODIFIER|EPlOSAG00000023903|EPlOSAG00000023903|transcript|EPlOSAT00000025291|lincRNA||n.*1393_*1394insA|||||1394|,GA|intron_variant|MODIFIER|OS01G0121200|OS01G0121200|transcript|OS01T0121200-01|protein_coding|2/8|c.-5-84_-5-83insT||||||
chr01	1231234	CA	C	10262.9	0/0	1/1	0/0	0/0	1/1	1/1	1/1	1/1	0/0	1/1	0/0	0/0	1/1	0/0	0/0	0/0	0/0	0/0	0/0	1/1	0/0	0/0	0/0	0/0	C|upstream_gene_variant|MODIFIER|OS01G0121700|OS01G0121700|transcript|OS01T0121700-01|protein_coding||c.-853delT|||||735|,C|upstream_gene_variant|MODIFIER|OS01G0121800|OS01G0121800|transcript|OS01T0121800-01|protein_coding||c.-1452delA|||||1258|,C|downstream_gene_variant|MODIFIER|EPlOSAG00000029896|EPlOSAG00000029896|transcript|EPlOSAT00000031284|lincRNA||n.*18delA|||||18|,C|intergenic_region|MOD…
chr01	1257680	GT	G	2385.3	0/0	0/0	0/0	0/0	0/0	0/0	1/1	0/0	0/0	1/1	0/0	0/0	0/0	0/0	0/0	0/0	0/0	0/0	0/0	1/1	0/0	0/0	0/0	0/0	G|intergenic_region|MODIFIER|OS01G0122200-EPlOSAG00000008877|OS01G0122200-EPlOSAG00000008877|intergenic_region|OS01G0122200-EPlOSAG00000008877|||n.1257681delT||||||
chr01	1257867	CA	C	2045.31	0/0	1/1	0/0	0/0	0/0	./.	0/0	0/0	0/0	0/0	0/0	0/0	0/0	0/0	0/0	0/0	0/0	0/0	0/0	0/0	0/0	0/0	0/0	0/0	C|intergenic_region|MODIFIER|OS01G0122200-EPlOSAG00000008877|OS01G0122200-EPlOSAG00000008877|intergenic_region|OS01G0122200-EPlOSAG00000008877|||n.1257868delA||||||
chr01	1271466	C	CCCG	333.09	0/0	0/0	0/0	0/0	./.	0/0	./.	./.	0/0	./.	0/0	0/0	./.	0/0	0/0	0/0	0/0	0/0	0/0	1|1	0/0	0/0	0/0	0/0	CCCG|intergenic_region|MODIFIER|OS01G0122701-EPlOSAG00000003494|OS01G0122701-EPlOSAG00000003494|intergenic_region|OS01G0122701-EPlOSAG00000003494|||n.1271466_1271467insCCG||||||
chr01	1286961	CCA	C	194.82	0/0	0/0	0/0	./.	./.	0/0	1/1	0/0	./.	./.	0/0	0/0	0/0	0/0	0/0	./.	0/0	0/0	0/0	0/0	0/0	0/0	0/0	./.	C|upstream_gene_variant|MODIFIER|EPlOSAG00000022802|EPlOSAG00000022802|transcript|EPlOSAT00000024190|lincRNA||n.-1672_-1671delTG|||||1671|,C|intergenic_region|MODIFIER|EPlOSAG00000022802-EPlOSAG00000007620|EPlOSAG00000022802-EPlOSAG00000007620|intergenic_region|EPlOSAG00000022802-EPlOSAG00000007620|||n.1286962_1286963delCA||||||
chr01	1298868	G	GTTTAGGCCCGATTGAGATAACATTCCATATCTCAAACGGGCCTAAAGTTGCGGCCCGTCACAGATGACCATCATCTGTGACGGGCACCAAC	1168.65	0/0	0/0	0/0	0/0	0/0	./.	0/0	0/0	0/0	0/0	0/0	0/0	0/0	0/0	0/0	0/0	0/0	0/0	0/0	0/0	0/0	1/1	0/0	0/0	GTTTAGGCCCGATTGAGATAACATTCCATATCTCAAACGGGCCTAAAGTTGCGGCCCGTCACAGATGACCATCATCTGTGACGGGCACCAAC|upstream_gene_variant|MODIFIER|EPlOSAG00000045734|EPlOSAG00000045734|transcript|EPlOSAT00000047122|lincRNA||n.-471_-470insTTTAGGCCCGATTGAGATAACATTCCATATCTCAAACGGGCCTAAAGTTGCGGCCCGTCACAGATGACCATCATCTGTGACGGGCACCAAC|||||470|,GTTTAGGCCCGATTGAGATAACATTCCATATCTCAAACGGGCCTAAAGTTGCGGCCCGTCACAGATGACCATCATCTGTGACG…
chr01	1312592	GTA	G	1874.02	0/0	1/1	0/0	./.	1/1	./.	0/0	1/1	0/0	./.	./.	0/0	1/1	0/0	0/0	0/0	0/0	0/0	0/0	0/0	0/0	0/0	0/0	0/0	G|upstream_gene_variant|MODIFIER|EPlOSAG00000004232|EPlOSAG00000004232|transcript|EPlOSAT00000005620|lincRNA||n.-1617_-1616delTA|||||1616|,G|intergenic_region|MODIFIER|EPlOSAG00000004232-EPlOSAG00000038277|EPlOSAG00000004232-EPlOSAG00000038277|intergenic_region|EPlOSAG00000004232-EPlOSAG00000038277|||n.1312593_1312594delTA||||||
chr01	1321202	CA	C	5219.15	0/0	0/0	0/0	0/0	1/1	0/0	1/1	1/1	0/0	1/1	0/0	0/0	1/1	0/0	0/0	0/0	0/0	0/0	0/0	1/1	0/0	0/0	0/0	0/0	C|downstream_gene_variant|MODIFIER|EPlOSAG00000015791|EPlOSAG00000015791|transcript|EPlOSAT00000017179|lincRNA||n.*443delT|||||443|,C|intergenic_region|MODIFIER|EPlOSAG00000038277-EPlOSAG00000015791|EPlOSAG00000038277-EPlOSAG00000015791|intergenic_region|EPlOSAG00000038277-EPlOSAG00000015791|||n.1321203delA||||||
chr01	1339219	A	AC	8033.01	0/0	0/0	0/0	0/0	1/1	0/0	1/1	1/1	0/0	1/1	0/0	0/0	1/1	0/0	0/0	0/0	0/0	0/0	0/0	1/1	0/0	0/0	0/0	0/0	AC|upstream_gene_variant|MODIFIER|OS01G0123900|OS01G0123900|transcript|OS01T0123900-01|protein_coding||c.-145_-144insG|||||122|,AC|upstream_gene_variant|MODIFIER|EPlOSAG00000053167|EPlOSAG00000053167|transcript|EPlOSAT00000053167|lincRNA||n.-1101_-1100insC|||||1100|,AC|downstream_gene_variant|MODIFIER|OS01G0123800|OS01G0123800|transcript|OS01T0123800-00|protein_coding||c.*1812_*1813insC|||||1813|…
chr01	1344339	TG	T	3394.79	0/0	0/0	0/0	0/0	0/0	0/0	0/0	0/0	0/0	1/1	0/0	0/0	0/0	0/0	0/0	0/0	0/0	0/0	0/0	1/1	0/0	0/0	0/0	0/0	T|downstream_gene_variant|MODIFIER|OS01G0124100|OS01G0124100|transcript|OS01T0124100-01|protein_coding||c.*907delC|||||778|,T|non_coding_transcript_exon_variant|MODIFIER|EPlOSAG00000004696|EPlOSAG00000004696|transcript|EPlOSAT00000006084|lincRNA|1/1|n.89delG||||||
chr01	1347425	T	TTTA,TTTATTATTATTATTA	1217.2	0/0	0/0	0/0	0/0	0/0	0/0	0/0	0/0	0/0	0/0	0/0	1/1	0/0	0/0	0/0	0/0	0/0	0/0	0/0	2/2	0/0	0/0	0/0	0/0	TTTA|upstream_gene_variant|MODIFIER|OS01G0124100|OS01G0124100|transcript|OS01T0124100-01|protein_coding||c.-1400_-1399insTAA|||||1379|,TTTATTATTATTATTA|upstream_gene_variant|MODIFIER|OS01G0124100|OS01G0124100|transcript|OS01T0124100-01|protein_coding||c.-1400_-1399insTAATAATAATAATAA|||||1379|,TTTA|downstream_gene_variant|MODIFIER|OS01G0124200|OS01G0124200|transcript|OS01T0124200-02|protein_coding…
chr01	1352385	TA	T	2943.73	0/0	0/0	0/0	0/0	0/0	0/0	1/1	0/0	0/0	1/1	0/0	0/0	0/0	0/0	0/0	0/0	0/0	0/0	0/0	1/1	0/0	0/0	0/0	0/0	T|downstream_gene_variant|MODIFIER|RBBI3.3|OS01G0124401|transcript|OS01T0124401-01|protein_coding||c.*1596delT|||||1319|,T|intergenic_region|MODIFIER|OS01G0124200-RBBI3.3|OS01G0124200-OS01G0124401|intergenic_region|OS01G0124200-OS01G0124401|||n.1352386delA||||||
chr01	1360686	AACG	A	12607	0/0	0/0	0/0	0/0	1/1	0/0	1/1	1/1	0/0	1/1	0/0	0/0	1/1	0/0	0/0	0/0	0/0	0/0	0/0	1/1	0/0	0/0	0/0	0/0	A|disruptive_inframe_deletion|MODERATE|OS01G0124550|OS01G0124550|transcript|OS01T0124550-00|protein_coding|10/10|c.218_220delCGA|p.Thr73del|2215/2571|218/574|73/190||WARNING_TRANSCRIPT_INCOMPLETE&INFO_REALIGN_3_PRIME,A|upstream_gene_variant|MODIFIER|EPlOSAG00000029637|EPlOSAG00000029637|transcript|EPlOSAT00000031025|lincRNA||n.-1802_-1800delCGT|||||1800|,A|downstream_gene_variant|MODIFIER|EPlOSAG…
chr01	1363297	TA	T	16167.4	0/0	0/0	0/0	0/0	1|1	0/0	1|1	1|1	0/0	1|1	0/0	0/0	1|1	1|1	0/0	0/0	0/0	0/0	0/0	1|1	0/0	0/0	0/0	0/0	T|downstream_gene_variant|MODIFIER|OS01G0124600|OS01G0124600|transcript|OS01T0124600-00|protein_coding||c.*412delT|||||412|,T|intergenic_region|MODIFIER|OS01G0124550-OS01G0124600|OS01G0124550-OS01G0124600|intergenic_region|OS01G0124550-OS01G0124600|||n.1363298delA||||||
chr01	1364416	G	GA	6111.01	0/0	0/0	0/0	0/0	1/1	0/0	1/1	1/1	0/0	1/1	0/0	0/0	1/1	0/0	0/0	0/0	0/0	0/0	0/0	1/1	0/0	0/0	0/0	0/0	GA|upstream_gene_variant|MODIFIER|OS01G0124600|OS01G0124600|transcript|OS01T0124600-00|protein_coding||c.-135_-134insT|||||135|,GA|upstream_gene_variant|MODIFIER|OS01G0124700|OS01G0124700|transcript|OS01T0124700-01|protein_coding||c.-1693_-1692insA|||||1286|,GA|downstream_gene_variant|MODIFIER|OS01G0124650|OS01G0124650|transcript|OS01T0124650-02|protein_coding||c.*1439_*1440insT|||||1169|,GA|inte…
chr01	1365385	CA	C	9017.02	0/0	0/0	0/0	0/0	1|1	0/0	1|1	1|1	0/0	1|1	0/0	0/0	1|1	0/0	0/0	0/0	0/0	0/0	0/0	1|1	0/0	0/0	0/0	0/0	C|upstream_gene_variant|MODIFIER|OS01G0124600|OS01G0124600|transcript|OS01T0124600-00|protein_coding||c.-1104delT|||||1104|,C|upstream_gene_variant|MODIFIER|OS01G0124700|OS01G0124700|transcript|OS01T0124700-01|protein_coding||c.-723delA|||||317|,C|downstream_gene_variant|MODIFIER|OS01G0124650|OS01G0124650|transcript|OS01T0124650-02|protein_coding||c.*470delT|||||200|,C|intergenic_region|MODIFIER|…
chr01	1365708	A	AC	16431	0/0	0/0	0/0	0/0	1|1	0/0	1|1	1|1	0/0	1|1	0/0	0/0	1|1	0/0	0/0	0/0	0/0	0/0	0/0	1|1	0/0	0/0	0/0	0/0	AC|5_prime_UTR_variant|MODIFIER|OS01G0124700|OS01G0124700|transcript|OS01T0124700-01|protein_coding|1/1|c.-401_-400insC|||||400|,AC|3_prime_UTR_variant|MODIFIER|OS01G0124650|OS01G0124650|transcript|OS01T0124650-02|protein_coding|1/1|c.*147_*148insG|||||147|,AC|upstream_gene_variant|MODIFIER|OS01G0124600|OS01G0124600|transcript|OS01T0124600-00|protein_coding||c.-1427_-1426insG|||||1427|
chr01	1365837	C	CAT	7612	0/0	0/0	0/0	0/0	1|1	0/0	1|1	1|1	0/0	1|1	0/0	0/0	1|1	0/0	0/0	0/0	0/0	0/0	0/0	1|1	0/0	0/0	0/0	0/0	CAT|5_prime_UTR_variant|MODIFIER|OS01G0124700|OS01G0124700|transcript|OS01T0124700-01|protein_coding|1/1|c.-270_-269dupTA|||||268|INFO_REALIGN_3_PRIME,CAT|3_prime_UTR_variant|MODIFIER|OS01G0124650|OS01G0124650|transcript|OS01T0124650-02|protein_coding|1/1|c.*17_*18dupAT|||||18|,CAT|upstream_gene_variant|MODIFIER|OS01G0124600|OS01G0124600|transcript|OS01T0124600-00|protein_coding||c.-1557_-1556dup…
chr01	1365864	C	CCGT	7977.01	0/0	0/0	0/0	0/0	1|1	0/0	1|1	1|1	0/0	1|1	0/0	0/0	1|1	0/0	0/0	0/0	0/0	0/0	0/0	1|1	0/0	0/0	0/0	0/0	CCGT|conservative_inframe_insertion|MODERATE|OS01G0124650|OS01G0124650|transcript|OS01T0124650-02|protein_coding|1/1|c.549_550insACG|p.Cys183_Glu184insThr|568/847|549/558|183/185||,CCGT|5_prime_UTR_variant|MODIFIER|OS01G0124700|OS01G0124700|transcript|OS01T0124700-01|protein_coding|1/1|c.-245_-244insCGT|||||244|,CCGT|upstream_gene_variant|MODIFIER|OS01G0124600|OS01G0124600|transcript|OS01T0124600…
chr01	1366329	CG	C	4883.31	0/0	0/0	0/0	0/0	1|1	0/0	1|1	1|1	0/0	1|1	0/0	0/0	1|1	0/0	0/0	0/0	0/0	0/0	0/0	./.	0/0	0/0	0/0	0/0	C|frameshift_variant|HIGH|OS01G0124650|OS01G0124650|transcript|OS01T0124650-02|protein_coding|1/1|c.84delC|p.Asp28fs|103/847|84/558|28/185||,C|frameshift_variant|HIGH|OS01G0124700|OS01G0124700|transcript|OS01T0124700-01|protein_coding|1/1|c.222delG|p.Ser75fs|628/800|222/318|74/105||
chr01	1366331	TCG	T	4858.31	0/0	0/0	0/0	0/0	1|1	0/0	1|1	1|1	0/0	1|1	0/0	0/0	1|1	0/0	0/0	0/0	0/0	0/0	0/0	./.	0/0	0/0	0/0	0/0	T|frameshift_variant|HIGH|OS01G0124650|OS01G0124650|transcript|OS01T0124650-02|protein_coding|1/1|c.81_82delCG|p.Asp27fs|101/847|81/558|27/185||,T|frameshift_variant|HIGH|OS01G0124700|OS01G0124700|transcript|OS01T0124700-01|protein_coding|1/1|c.224_225delCG|p.Ser75fs|630/800|224/318|75/105||
chr01	1366639	ATCT	A	66.75	0/0	0/0	0/0	0/0	1|1	0/0	.	1|1	0/0	1|1	0/0	0/0	1|1	0/0	0/0	0/0	0/0	0/0	0/0	.	0/0	0/0	0/0	0/0	A|upstream_gene_variant|MODIFIER|OS01G0124650|OS01G0124650|transcript|OS01T0124650-02|protein_coding||c.-229_-227delAGA|||||208|,A|downstream_gene_variant|MODIFIER|OS01G0124700|OS01G0124700|transcript|OS01T0124700-01|protein_coding||c.*214_*216delTCT|||||138|,A|intergenic_region|MODIFIER|OS01G0124700-OS01G0124900|OS01G0124700-OS01G0124900|intergenic_region|OS01G0124700-OS01G0124900|||n.1366640_13…
chr01	1366644	GTGGTATGAAAGATGGAGATTAT	G	63.17	0/0	0/0	0/0	0/0	.	0/0	.	1|1	0/0	.	0/0	0/0	1|1	0/0	0/0	0/0	0/0	0/0	0/0	.	0/0	0/0	0/0	0/0	G|upstream_gene_variant|MODIFIER|OS01G0124650|OS01G0124650|transcript|OS01T0124650-02|protein_coding||c.-253_-232delATAATCTCCATCTTTCATACCA|||||213|,G|downstream_gene_variant|MODIFIER|OS01G0124700|OS01G0124700|transcript|OS01T0124700-01|protein_coding||c.*219_*240delTGGTATGAAAGATGGAGATTAT|||||143|,G|intergenic_region|MODIFIER|OS01G0124700-OS01G0124900|OS01G0124700-OS01G0124900|intergenic_region|OS…
chr01	1366684	A	AC	294.68	0/0	0/0	0/0	0/0	1/1	0/0	1/1	1/1	0/0	1/1	0/0	0/0	1/1	0/0	0/0	0/0	0/0	0/0	0/0	./.	0/0	0/0	0/0	0/0	AC|upstream_gene_variant|MODIFIER|OS01G0124650|OS01G0124650|transcript|OS01T0124650-02|protein_coding||c.-272_-271insG|||||253|,AC|downstream_gene_variant|MODIFIER|OS01G0124700|OS01G0124700|transcript|OS01T0124700-01|protein_coding||c.*258_*259insC|||||183|,AC|intergenic_region|MODIFIER|OS01G0124700-OS01G0124900|OS01G0124700-OS01G0124900|intergenic_region|OS01G0124700-OS01G0124900|||n.1366684_136…
chr01	1366697	AATAT	A	702.55	0/0	0/0	0/0	0/0	1|1	0/0	1|1	1|1	0/0	1|1	0/0	0/0	1|1	0/0	0/0	0/0	0/0	0/0	0/0	.	0/0	0/0	0/0	0/0	A|upstream_gene_variant|MODIFIER|OS01G0124650|OS01G0124650|transcript|OS01T0124650-02|protein_coding||c.-288_-285delATAT|||||266|,A|downstream_gene_variant|MODIFIER|OS01G0124700|OS01G0124700|transcript|OS01T0124700-01|protein_coding||c.*272_*275delATAT|||||196|,A|intergenic_region|MODIFIER|OS01G0124700-OS01G0124900|OS01G0124700-OS01G0124900|intergenic_region|OS01G0124700-OS01G0124900|||n.1366698_…
chr01	1366787	A	AATTAAG	1235.53	0/0	0/0	0/0	0/0	1|1	0/0	1|1	1|1	0/0	1|1	0/0	0/0	1|1	0/0	0/0	0/0	0/0	0/0	0/0	./.	0/0	0/0	0/0	0/0	AATTAAG|upstream_gene_variant|MODIFIER|OS01G0124650|OS01G0124650|transcript|OS01T0124650-02|protein_coding||c.-375_-374insCTTAAT|||||356|,AATTAAG|downstream_gene_variant|MODIFIER|OS01G0124700|OS01G0124700|transcript|OS01T0124700-01|protein_coding||c.*361_*362insATTAAG|||||286|,AATTAAG|intergenic_region|MODIFIER|OS01G0124700-OS01G0124900|OS01G0124700-OS01G0124900|intergenic_region|OS01G0124700-OS0…
chr01	1366802	G	GC	1805.19	0/0	0/0	0/0	0/0	1|1	0/0	1|1	1|1	0/0	1|1	0/0	0/0	1|1	0/0	0/0	0/0	0/0	0/0	0/0	1|1	0/0	0/0	0/0	0/0	GC|upstream_gene_variant|MODIFIER|OS01G0124650|OS01G0124650|transcript|OS01T0124650-02|protein_coding||c.-390_-389insG|||||371|,GC|downstream_gene_variant|MODIFIER|OS01G0124700|OS01G0124700|transcript|OS01T0124700-01|protein_coding||c.*376_*377insC|||||301|,GC|intergenic_region|MODIFIER|OS01G0124700-OS01G0124900|OS01G0124700-OS01G0124900|intergenic_region|OS01G0124700-OS01G0124900|||n.1366802_136…
chr01	1366872	A	ACTACATCCGTCCCAAAATACTTATCGCTTTAAGTTTTTTAATTTTTTTTGAAATTATGATATT	766.74	0/0	0/0	0/0	0/0	0/0	0/0	1|1	./.	0/0	0/0	0/0	0/0	0/0	0/0	0/0	0/0	0/0	0/0	0/0	0/0	0/0	0/0	0/0	0/0	ACTACATCCGTCCCAAAATACTTATCGCTTTAAGTTTTTTAATTTTTTTTGAAATTATGATATT|upstream_gene_variant|MODIFIER|OS01G0124650|OS01G0124650|transcript|OS01T0124650-02|protein_coding||c.-460_-459insAATATCATAATTTCAAAAAAAATTAAAAAACTTAAAGCGATAAGTATTTTGGGACGGATGTAG|||||441|,ACTACATCCGTCCCAAAATACTTATCGCTTTAAGTTTTTTAATTTTTTTTGAAATTATGATATT|downstream_gene_variant|MODIFIER|OS01G0124700|OS01G0124700|transcript|OS01T0124700…
chr01	1367208	TG	T	10980	0/0	0/0	0/0	0/0	1|1	0/0	1|1	1|1	0/0	1|1	0/0	0/0	1|1	0/0	0/0	0/0	0/0	0/0	0/0	1|1	0/0	0/0	0/0	0/0	T|upstream_gene_variant|MODIFIER|OS01G0124650|OS01G0124650|transcript|OS01T0124650-02|protein_coding||c.-796delC|||||777|,T|upstream_gene_variant|MODIFIER|OS01G0124900|OS01G0124900|transcript|OS01T0124900-00|protein_coding||c.-2529delG|||||1982|,T|downstream_gene_variant|MODIFIER|OS01G0124700|OS01G0124700|transcript|OS01T0124700-01|protein_coding||c.*783delG|||||707|,T|intergenic_region|MODIFIER|…
chr01	1367448	C	CA	11695	0/0	0/0	0/0	0/0	1|1	0/0	1|1	1|1	0/0	1|1	0/0	0/0	1|1	0/0	0/0	0/0	0/0	0/0	0/0	1/1	0/0	0/0	0/0	0/0	CA|upstream_gene_variant|MODIFIER|OS01G0124650|OS01G0124650|transcript|OS01T0124650-02|protein_coding||c.-1036_-1035insT|||||1017|,CA|upstream_gene_variant|MODIFIER|OS01G0124900|OS01G0124900|transcript|OS01T0124900-00|protein_coding||c.-2290_-2289insA|||||1742|,CA|downstream_gene_variant|MODIFIER|OS01G0124700|OS01G0124700|transcript|OS01T0124700-01|protein_coding||c.*1022_*1023insA|||||947|,CA|in…
chr01	1367614	CCA	C	11972	0/0	0/0	0/0	0/0	1|1	0/0	1|1	1|1	0/0	1|1	0/0	0/0	1|1	0/0	0/0	0/0	0/0	0/0	0/0	1|1	0/0	0/0	0/0	0/0	C|upstream_gene_variant|MODIFIER|OS01G0124650|OS01G0124650|transcript|OS01T0124650-02|protein_coding||c.-1203_-1202delTG|||||1183|,C|upstream_gene_variant|MODIFIER|OS01G0124900|OS01G0124900|transcript|OS01T0124900-00|protein_coding||c.-2123_-2122delCA|||||1576|,C|downstream_gene_variant|MODIFIER|OS01G0124700|OS01G0124700|transcript|OS01T0124700-01|protein_coding||c.*1189_*1190delCA|||||1113|,C|in…
chr01	1367699	C	CTCA	10700	0/0	0/0	0/0	0/0	1|1	0/0	1|1	1|1	0/0	1|1	0/0	0/0	1|1	0/0	0/0	0/0	0/0	0/0	0/0	1|1	0/0	0/0	0/0	0/0	CTCA|upstream_gene_variant|MODIFIER|OS01G0124650|OS01G0124650|transcript|OS01T0124650-02|protein_coding||c.-1287_-1286insTGA|||||1268|,CTCA|upstream_gene_variant|MODIFIER|OS01G0124900|OS01G0124900|transcript|OS01T0124900-00|protein_coding||c.-2039_-2038insTCA|||||1491|,CTCA|downstream_gene_variant|MODIFIER|OS01G0124700|OS01G0124700|transcript|OS01T0124700-01|protein_coding||c.*1273_*1274insTCA|||…
chr01	1367849	TC	T	10035	0/0	0/0	0/0	0/0	1/1	0/0	1/1	1/1	0/0	1/1	0/0	0/0	1/1	0/0	0/0	0/0	0/0	0/0	0/0	1/1	0/0	0/0	0/0	0/0	T|upstream_gene_variant|MODIFIER|OS01G0124650|OS01G0124650|transcript|OS01T0124650-02|protein_coding||c.-1437delG|||||1418|,T|upstream_gene_variant|MODIFIER|OS01G0124900|OS01G0124900|transcript|OS01T0124900-00|protein_coding||c.-1888delC|||||1341|,T|downstream_gene_variant|MODIFIER|OS01G0124700|OS01G0124700|transcript|OS01T0124700-01|protein_coding||c.*1424delC|||||1348|,T|intergenic_region|MODIF…
chr01	1368230	G	GAA	14512.8	0/0	0/0	0/0	0/0	1/1	0/0	1|1	1|1	0/0	1|1	0/0	0/0	1|1	0/0	0/0	0/0	0/0	0/0	0/0	1|1	0/0	0/0	0/0	0/0	GAA|upstream_gene_variant|MODIFIER|OS01G0124650|OS01G0124650|transcript|OS01T0124650-02|protein_coding||c.-1818_-1817insTT|||||1799|,GAA|upstream_gene_variant|MODIFIER|OS01G0124900|OS01G0124900|transcript|OS01T0124900-00|protein_coding||c.-1508_-1507insAA|||||960|,GAA|downstream_gene_variant|MODIFIER|OS01G0124700|OS01G0124700|transcript|OS01T0124700-01|protein_coding||c.*1804_*1805insAA|||||1729|…
chr01	1374098	AGG	A	15463	0/0	0/0	0/0	0/0	1|1	0/0	1|1	1|1	0/0	1|1	0/0	0/0	1|1	0/0	0/0	0/0	0/0	0/0	0/0	1|1	0/0	0/0	0/0	0/0	A|frameshift_variant|HIGH|OS01G0124900|OS01G0124900|transcript|OS01T0124900-00|protein_coding|3/3|c.558_559delGG|p.Asp187fs|786/825|558/597|186/198||,A|upstream_gene_variant|MODIFIER|EPlOSAG00000020368|EPlOSAG00000020368|transcript|EPlOSAT00000021756|lincRNA||n.-725_-724delGG|||||725|,A|upstream_gene_variant|MODIFIER|OS01G0125000|OS01G0125000|transcript|OS01T0125000-00|protein_coding||c.-1070_-10…
chr01	1374101	ATGAGGATGAC	A	15687	0/0	0/0	0/0	0/0	1|1	0/0	1|1	1|1	0/0	1|1	0/0	0/0	1|1	0/0	0/0	0/0	0/0	0/0	0/0	1|1	0/0	0/0	0/0	0/0	A|frameshift_variant|HIGH|OS01G0124900|OS01G0124900|transcript|OS01T0124900-00|protein_coding|3/3|c.561_570delTGAGGATGAC|p.Asp187fs|789/825|561/597|187/198||,A|upstream_gene_variant|MODIFIER|EPlOSAG00000020368|EPlOSAG00000020368|transcript|EPlOSAT00000021756|lincRNA||n.-722_-713delTGAGGATGAC|||||722|,A|upstream_gene_variant|MODIFIER|OS01G0125000|OS01G0125000|transcript|OS01T0125000-00|protein_cod…
chr01	1374470	TC	T	9138.98	0/0	0/0	0/0	0/0	1/1	0/0	1/1	1/1	0/0	1/1	0/0	0/0	1/1	0/0	0/0	0/0	0/0	0/0	0/0	1/1	0/0	0/0	0/0	0/0	T|upstream_gene_variant|MODIFIER|EPlOSAG00000020368|EPlOSAG00000020368|transcript|EPlOSAT00000021756|lincRNA||n.-353delC|||||353|,T|upstream_gene_variant|MODIFIER|OS01G0125000|OS01G0125000|transcript|OS01T0125000-00|protein_coding||c.-698delC|||||698|,T|downstream_gene_variant|MODIFIER|OS01G0124900|OS01G0124900|transcript|OS01T0124900-00|protein_coding||c.*333delC|||||333|,T|intergenic_region|MOD…
chr01	1374695	C	CCTCT	11106	0/0	0/0	0/0	0/0	1|1	0/0	1|1	1|1	0/0	1|1	0/0	0/0	1|1	0/0	0/0	0/0	0/0	0/0	0/0	1|1	0/0	0/0	0/0	0/0	CCTCT|upstream_gene_variant|MODIFIER|EPlOSAG00000020368|EPlOSAG00000020368|transcript|EPlOSAT00000021756|lincRNA||n.-129_-128insCTCT|||||128|,CCTCT|upstream_gene_variant|MODIFIER|OS01G0125000|OS01G0125000|transcript|OS01T0125000-00|protein_coding||c.-474_-473insCTCT|||||473|,CCTCT|downstream_gene_variant|MODIFIER|OS01G0124900|OS01G0124900|transcript|OS01T0124900-00|protein_coding||c.*557_*558insC…
chr01	1374838	T	TTAA	8062.01	0/0	0/0	0/0	0/0	1/1	0/0	1/1	1/1	0/0	1/1	0/0	0/0	1/1	0/0	0/0	0/0	0/0	0/0	0/0	1/1	0/0	0/0	0/0	0/0	TTAA|upstream_gene_variant|MODIFIER|OS01G0125000|OS01G0125000|transcript|OS01T0125000-00|protein_coding||c.-331_-330insTAA|||||330|,TTAA|downstream_gene_variant|MODIFIER|OS01G0124900|OS01G0124900|transcript|OS01T0124900-00|protein_coding||c.*700_*701insTAA|||||701|,TTAA|non_coding_transcript_exon_variant|MODIFIER|EPlOSAG00000020368|EPlOSAG00000020368|transcript|EPlOSAT00000021756|lincRNA|1/1|n.15…
chr01	1374898	C	CG	9722.01	0/0	0/0	0/0	0/0	1|1	0/0	1|1	1|1	0/0	1|1	0/0	0/0	1|1	0/0	0/0	0/0	0/0	0/0	0/0	1|1	0/0	0/0	0/0	0/0	CG|upstream_gene_variant|MODIFIER|OS01G0125000|OS01G0125000|transcript|OS01T0125000-00|protein_coding||c.-271_-270insG|||||270|,CG|downstream_gene_variant|MODIFIER|OS01G0124900|OS01G0124900|transcript|OS01T0124900-00|protein_coding||c.*760_*761insG|||||761|,CG|downstream_gene_variant|MODIFIER|EPlOSAG00000020368|EPlOSAG00000020368|transcript|EPlOSAT00000021756|lincRNA||n.*9_*10insG|||||10|,CG|inte…
chr01	1375335	T	TTGA	5870.01	0/0	0/0	0/0	0/0	1|1	0/0	1|1	1|1	0/0	1|1	0/0	0/0	1|1	0/0	0/0	0/0	0/0	0/0	0/0	1|1	0/0	0/0	0/0	0/0	TTGA|downstream_gene_variant|MODIFIER|OS01G0124900|OS01G0124900|transcript|OS01T0124900-00|protein_coding||c.*1197_*1198insTGA|||||1198|,TTGA|downstream_gene_variant|MODIFIER|EPlOSAG00000020368|EPlOSAG00000020368|transcript|EPlOSAT00000021756|lincRNA||n.*446_*447insTGA|||||447|,TTGA|intron_variant|MODIFIER|OS01G0125000|OS01G0125000|transcript|OS01T0125000-00|protein_coding|1/1|c.156+11_156+12insT…
chr01	1375342	A	AGAATT	4790.01	0/0	0/0	0/0	0/0	1|1	0/0	1|1	1|1	0/0	1|1	0/0	0/0	1|1	0/0	0/0	0/0	0/0	0/0	0/0	1|1	0/0	0/0	0/0	0/0	AGAATT|downstream_gene_variant|MODIFIER|OS01G0124900|OS01G0124900|transcript|OS01T0124900-00|protein_coding||c.*1204_*1205insGAATT|||||1205|,AGAATT|downstream_gene_variant|MODIFIER|EPlOSAG00000020368|EPlOSAG00000020368|transcript|EPlOSAT00000021756|lincRNA||n.*453_*454insGAATT|||||454|,AGAATT|intron_variant|MODIFIER|OS01G0125000|OS01G0125000|transcript|OS01T0125000-00|protein_coding|1/1|c.156+18_…
chr01	1375375	A	ATTTCT	4745	0/0	0/0	0/0	0/0	1|1	0/0	1|1	1|1	0/0	1|1	0/0	0/0	1|1	0/0	0/0	0/0	0/0	0/0	0/0	1|1	0/0	0/0	0/0	0/0	ATTTCT|downstream_gene_variant|MODIFIER|OS01G0124900|OS01G0124900|transcript|OS01T0124900-00|protein_coding||c.*1237_*1238insTTTCT|||||1238|,ATTTCT|downstream_gene_variant|MODIFIER|EPlOSAG00000020368|EPlOSAG00000020368|transcript|EPlOSAT00000021756|lincRNA||n.*486_*487insTTTCT|||||487|,ATTTCT|intron_variant|MODIFIER|OS01G0125000|OS01G0125000|transcript|OS01T0125000-00|protein_coding|1/1|c.156+51_…
chr01	1375377	T	TCGAGTTCAACGTTTTGAAGTGAAGTTGGTCTCACATGGATGCGTTGCATGCTCTTG	11927	0/0	0/0	0/0	0/0	1|1	0/0	1|1	1|1	0/0	1|1	0/0	0/0	1|1	0/0	0/0	0/0	0/0	0/0	0/0	1|1	0/0	0/0	0/0	0/0	TCGAGTTCAACGTTTTGAAGTGAAGTTGGTCTCACATGGATGCGTTGCATGCTCTTG|downstream_gene_variant|MODIFIER|OS01G0124900|OS01G0124900|transcript|OS01T0124900-00|protein_coding||c.*1239_*1240insCGAGTTCAACGTTTTGAAGTGAAGTTGGTCTCACATGGATGCGTTGCATGCTCTTG|||||1240|,TCGAGTTCAACGTTTTGAAGTGAAGTTGGTCTCACATGGATGCGTTGCATGCTCTTG|downstream_gene_variant|MODIFIER|EPlOSAG00000020368|EPlOSAG00000020368|transcript|EPlOSAT000000217…
chr01	1375434	GT	G	13385	0/0	0/0	0/0	0/0	1|1	0/0	1|1	1|1	0/0	1|1	0/0	0/0	1|1	0/0	0/0	0/0	0/0	0/0	0/0	1|1	0/0	0/0	0/0	0/0	G|downstream_gene_variant|MODIFIER|OS01G0124900|OS01G0124900|transcript|OS01T0124900-00|protein_coding||c.*1297delT|||||1297|,G|downstream_gene_variant|MODIFIER|EPlOSAG00000020368|EPlOSAG00000020368|transcript|EPlOSAT00000021756|lincRNA||n.*546delT|||||546|,G|intron_variant|MODIFIER|OS01G0125000|OS01G0125000|transcript|OS01T0125000-00|protein_coding|1/1|c.157-29delT||||||
chr01	1375762	C	CTCG	11942	0/0	0/0	0/0	0/0	1/1	0/0	1/1	1/1	0/0	1/1	0/0	0/0	1/1	0/0	0/0	0/0	0/0	0/0	0/0	1/1	0/0	0/0	0/0	0/0	CTCG|disruptive_inframe_insertion|MODERATE|OS01G0125000|OS01G0125000|transcript|OS01T0125000-00|protein_coding|2/2|c.458_460dupGTC|p.Arg153dup|461/1020|461/1020|154/339||INFO_REALIGN_3_PRIME,CTCG|downstream_gene_variant|MODIFIER|OS01G0124900|OS01G0124900|transcript|OS01T0124900-00|protein_coding||c.*1624_*1625insTCG|||||1625|,CTCG|downstream_gene_variant|MODIFIER|EPlOSAG00000020368|EPlOSAG0000002…
chr01	1376189	GGAC	G	12136	0/0	0/0	0/0	0/0	1|1	0/0	1|1	1|1	0/0	1|1	0/0	0/0	1|1	0/0	0/0	0/0	0/0	0/0	0/0	1|1	0/0	0/0	0/0	0/0	G|disruptive_inframe_deletion|MODERATE|OS01G0125000|OS01G0125000|transcript|OS01T0125000-00|protein_coding|2/2|c.894_896delCGA|p.Asp298del|894/1020|894/1020|298/339||INFO_REALIGN_3_PRIME,G|downstream_gene_variant|MODIFIER|EPlOSAG00000020368|EPlOSAG00000020368|transcript|EPlOSAT00000021756|lincRNA||n.*1301_*1303delGAC|||||1301|
chr01	1376248	A	AG	11621	0/0	0/0	0/0	0/0	1|1	0/0	1|1	1|1	0/0	1|1	0/0	0/0	1|1	0/0	0/0	0/0	0/0	0/0	0/0	1|1	0/0	0/0	0/0	0/0	AG|frameshift_variant|HIGH|OS01G0125000|OS01G0125000|transcript|OS01T0125000-00|protein_coding|2/2|c.942dupG|p.Asn315fs|943/1020|943/1020|315/339||INFO_REALIGN_3_PRIME,AG|downstream_gene_variant|MODIFIER|EPlOSAG00000020368|EPlOSAG00000020368|transcript|EPlOSAT00000021756|lincRNA||n.*1359_*1360insG|||||1360|
chr01	1376250	A	AGGACGGGG	12838	0/0	0/0	0/0	0/0	1|1	0/0	1|1	1|1	0/0	1|1	0/0	0/0	1|1	0/0	0/0	0/0	0/0	0/0	0/0	1|1	0/0	0/0	0/0	0/0	AGGACGGGG|frameshift_variant|HIGH|OS01G0125000|OS01G0125000|transcript|OS01T0125000-00|protein_coding|2/2|c.943_944insGGACGGGG|p.Asn315fs|944/1020|944/1020|315/339||,AGGACGGGG|downstream_gene_variant|MODIFIER|EPlOSAG00000020368|EPlOSAG00000020368|transcript|EPlOSAT00000021756|lincRNA||n.*1361_*1362insGGACGGGG|||||1362|
chr01	1376252	T	TACCTCCGATGACGATTGACGAAGGCGAGGATGATGAGGAG	18139	0/0	0/0	0/0	0/0	1|1	0/0	1|1	1|1	0/0	1|1	0/0	0/0	1|1	0/0	0/0	0/0	0/0	0/0	0/0	1|1	0/0	0/0	0/0	0/0	TACCTCCGATGACGATTGACGAAGGCGAGGATGATGAGGAG|frameshift_variant&stop_gained|HIGH|OS01G0125000|OS01G0125000|transcript|OS01T0125000-00|protein_coding|2/2|c.945_946insACCTCCGATGACGATTGACGAAGGCGAGGATGATGAGGAG|p.Asp316fs|946/1020|946/1020|316/339||,TACCTCCGATGACGATTGACGAAGGCGAGGATGATGAGGAG|downstream_gene_variant|MODIFIER|EPlOSAG00000020368|EPlOSAG00000020368|transcript|EPlOSAT00000021756|lincRNA||n.*13…
chr01	1376337	C	CA	12523	0/0	0/0	0/0	0/0	1|1	0/0	1|1	1|1	0/0	1|1	0/0	0/0	1|1	0/0	0/0	0/0	0/0	0/0	0/0	1|1	0/0	0/0	0/0	0/0	CA|downstream_gene_variant|MODIFIER|EPlOSAG00000020368|EPlOSAG00000020368|transcript|EPlOSAT00000021756|lincRNA||n.*1448_*1449insA|||||1449|,CA|downstream_gene_variant|MODIFIER|OS01G0125000|OS01G0125000|transcript|OS01T0125000-00|protein_coding||c.*10_*11insA|||||11|,CA|intergenic_region|MODIFIER|OS01G0125000-EPlOSAG00000004794|OS01G0125000-EPlOSAG00000004794|intergenic_region|OS01G0125000-EPlOSA…
chr01	1376414	GC	G	4364.43	0/0	0/0	0/0	0/0	1|1	0/0	1|1	1|1	0/0	1|1	0/0	0/0	1|1	0/0	0/0	0/0	0/0	0/0	0/0	./.	0/0	0/0	0/0	0/0	G|downstream_gene_variant|MODIFIER|EPlOSAG00000020368|EPlOSAG00000020368|transcript|EPlOSAT00000021756|lincRNA||n.*1526delC|||||1526|,G|downstream_gene_variant|MODIFIER|OS01G0125000|OS01G0125000|transcript|OS01T0125000-00|protein_coding||c.*88delC|||||88|,G|intergenic_region|MODIFIER|OS01G0125000-EPlOSAG00000004794|OS01G0125000-EPlOSAG00000004794|intergenic_region|OS01G0125000-EPlOSAG00000004794|…
chr01	1376442	GTAC	G	4457.22	0/0	0/0	0/0	0/0	1/1	0/0	1/1	1/1	0/0	1/1	0/0	0/0	1/1	0/0	0/0	0/0	0/0	0/0	0/0	1|1	0/0	0/0	0/0	0/0	G|downstream_gene_variant|MODIFIER|EPlOSAG00000020368|EPlOSAG00000020368|transcript|EPlOSAT00000021756|lincRNA||n.*1554_*1556delTAC|||||1554|,G|downstream_gene_variant|MODIFIER|OS01G0125000|OS01G0125000|transcript|OS01T0125000-00|protein_coding||c.*116_*118delTAC|||||116|,G|intergenic_region|MODIFIER|OS01G0125000-EPlOSAG00000004794|OS01G0125000-EPlOSAG00000004794|intergenic_region|OS01G0125000-EP…
chr01	1376898	AT	A	1851.04	0/0	0/0	0/0	0/0	1|1	0/0	1|1	1|1	0/0	1|1	0/0	0/0	1|1	0/0	0/0	0/0	0/0	0/0	0/0	./.	0/0	0/0	0/0	0/0	A|downstream_gene_variant|MODIFIER|OS01G0125000|OS01G0125000|transcript|OS01T0125000-00|protein_coding||c.*572delT|||||572|,A|intergenic_region|MODIFIER|OS01G0125000-EPlOSAG00000004794|OS01G0125000-EPlOSAG00000004794|intergenic_region|OS01G0125000-EPlOSAG00000004794|||n.1376899delT||||||
chr01	1376909	CCT	C	1291.06	0/0	0/0	0/0	0/0	1|1	0/0	./.	1|1	0/0	1|1	0/0	0/0	./.	0/0	0/0	0/0	0/0	0/0	0/0	./.	0/0	0/0	0/0	0/0	C|downstream_gene_variant|MODIFIER|OS01G0125000|OS01G0125000|transcript|OS01T0125000-00|protein_coding||c.*583_*584delCT|||||583|,C|intergenic_region|MODIFIER|OS01G0125000-EPlOSAG00000004794|OS01G0125000-EPlOSAG00000004794|intergenic_region|OS01G0125000-EPlOSAG00000004794|||n.1376910_1376911delCT||||||
chr01	1376960	GCT	G	1525.07	0/0	0/0	0/0	0/0	1|1	0/0	./.	1|1	0/0	1|1	0/0	0/0	./.	0/0	0/0	0/0	0/0	0/0	0/0	./.	0/0	0/0	0/0	0/0	G|downstream_gene_variant|MODIFIER|OS01G0125000|OS01G0125000|transcript|OS01T0125000-00|protein_coding||c.*634_*635delCT|||||634|,G|intergenic_region|MODIFIER|OS01G0125000-EPlOSAG00000004794|OS01G0125000-EPlOSAG00000004794|intergenic_region|OS01G0125000-EPlOSAG00000004794|||n.1376961_1376962delCT||||||
chr01	1376980	C	CTAAT	2469.99	0/0	0/0	0/0	0/0	1|1	0/0	0/0	1|1	0/0	1|1	0/0	0/0	./.	0/0	0/0	0/0	0/0	0/0	0/0	./.	0/0	0/0	0/0	0/0	CTAAT|downstream_gene_variant|MODIFIER|OS01G0125000|OS01G0125000|transcript|OS01T0125000-00|protein_coding||c.*653_*654insTAAT|||||654|,CTAAT|intergenic_region|MODIFIER|OS01G0125000-EPlOSAG00000004794|OS01G0125000-EPlOSAG00000004794|intergenic_region|OS01G0125000-EPlOSAG00000004794|||n.1376980_1376981insTAAT||||||
chr01	1377043	ATTCTTTTTGC	A	6067.87	0/0	0/0	0/0	0/0	1|1	0/0	0/0	1|1	0/0	1|1	0/0	0/0	0/0	0/0	0/0	0/0	0/0	0/0	0/0	./.	0/0	0/0	0/0	0/0	A|downstream_gene_variant|MODIFIER|OS01G0125000|OS01G0125000|transcript|OS01T0125000-00|protein_coding||c.*717_*726delTTCTTTTTGC|||||717|,A|intergenic_region|MODIFIER|OS01G0125000-EPlOSAG00000004794|OS01G0125000-EPlOSAG00000004794|intergenic_region|OS01G0125000-EPlOSAG00000004794|||n.1377044_1377053delTTCTTTTTGC||||||
chr01	1377219	G	GACGACGACAGCAGCA	8252.01	0/0	0/0	0/0	0/0	1|1	0/0	1|1	1|1	0/0	1|1	0/0	0/0	1|1	0/0	0/0	0/0	0/0	0/0	0/0	1|1	0/0	0/0	0/0	0/0	GACGACGACAGCAGCA|downstream_gene_variant|MODIFIER|OS01G0125000|OS01G0125000|transcript|OS01T0125000-00|protein_coding||c.*892_*893insACGACGACAGCAGCA|||||893|,GACGACGACAGCAGCA|intergenic_region|MODIFIER|OS01G0125000-EPlOSAG00000004794|OS01G0125000-EPlOSAG00000004794|intergenic_region|OS01G0125000-EPlOSAG00000004794|||n.1377219_1377220insACGACGACAGCAGCA||||||
chr01	1379003	C	CACTCATATAACATA	9822.01	0/0	0/0	0/0	0/0	1|1	0/0	1|1	1|1	0/0	1|1	0/0	0/0	1|1	0/0	0/0	0/0	0/0	0/0	0/0	1/1	0/0	0/0	0/0	0/0	CACTCATATAACATA|intergenic_region|MODIFIER|OS01G0125000-EPlOSAG00000004794|OS01G0125000-EPlOSAG00000004794|intergenic_region|OS01G0125000-EPlOSAG00000004794|||n.1379003_1379004insACTCATATAACATA||||||
chr01	1379005	T	TTATATAGCTGCAAACTCAATTC	11125	0/0	0/0	0/0	0/0	1|1	0/0	1|1	1|1	0/0	1|1	0/0	0/0	1|1	0/0	0/0	0/0	0/0	0/0	0/0	1|1	0/0	0/0	0/0	0/0	TTATATAGCTGCAAACTCAATTC|intergenic_region|MODIFIER|OS01G0125000-EPlOSAG00000004794|OS01G0125000-EPlOSAG00000004794|intergenic_region|OS01G0125000-EPlOSAG00000004794|||n.1379005_1379006insTATATAGCTGCAAACTCAATTC||||||
chr01	1379012	CA	C	8974.98	0/0	0/0	0/0	0/0	1|1	0/0	1|1	1|1	0/0	1|1	0/0	0/0	1|1	0/0	0/0	0/0	0/0	0/0	0/0	1|1	0/0	0/0	0/0	0/0	C|intergenic_region|MODIFIER|OS01G0125000-EPlOSAG00000004794|OS01G0125000-EPlOSAG00000004794|intergenic_region|OS01G0125000-EPlOSAG00000004794|||n.1379013delA||||||
chr01	1379080	C	CG	3709.99	0/0	0/0	0/0	0/0	1|1	0/0	1|1	1|1	0/0	1|1	0/0	0/0	1|1	0/0	0/0	0/0	0/0	0/0	0/0	1|1	0/0	0/0	0/0	0/0	CG|intergenic_region|MODIFIER|OS01G0125000-EPlOSAG00000004794|OS01G0125000-EPlOSAG00000004794|intergenic_region|OS01G0125000-EPlOSAG00000004794|||n.1379080_1379081insG||||||
chr01	1379530	C	CTAG	13362	0/0	0/0	0/0	0/0	1/1	0/0	1/1	1/1	0/0	1/1	0/0	0/0	1/1	0/0	0/0	0/0	0/0	0/0	0/0	1/1	0/0	0/0	0/0	0/0	CTAG|intergenic_region|MODIFIER|OS01G0125000-EPlOSAG00000004794|OS01G0125000-EPlOSAG00000004794|intergenic_region|OS01G0125000-EPlOSAG00000004794|||n.1379530_1379531insTAG||||||
chr01	1379607	A	AGTGAG	7940.01	0/0	0/0	0/0	0/0	1|1	0/0	1|1	1|1	0/0	1|1	0/0	0/0	1|1	0/0	0/0	0/0	0/0	0/0	0/0	1|1	0/0	0/0	0/0	0/0	AGTGAG|intergenic_region|MODIFIER|OS01G0125000-EPlOSAG00000004794|OS01G0125000-EPlOSAG00000004794|intergenic_region|OS01G0125000-EPlOSAG00000004794|||n.1379607_1379608insGTGAG||||||
chr01	1379610	GCACTCT	G	7486.98	0/0	0/0	0/0	0/0	1|1	0/0	1|1	1|1	0/0	1|1	0/0	0/0	1|1	0/0	0/0	0/0	0/0	0/0	0/0	1|1	0/0	0/0	0/0	0/0	G|intergenic_region|MODIFIER|OS01G0125000-EPlOSAG00000004794|OS01G0125000-EPlOSAG00000004794|intergenic_region|OS01G0125000-EPlOSAG00000004794|||n.1379611_1379616delCACTCT||||||
chr01	1379634	AAGCTAG	A	7376.98	0/0	0/0	0/0	0/0	1|1	0/0	1|1	1|1	0/0	1|1	0/0	0/0	1|1	0/0	0/0	0/0	0/0	0/0	0/0	1|1	0/0	0/0	0/0	0/0	A|intergenic_region|MODIFIER|OS01G0125000-EPlOSAG00000004794|OS01G0125000-EPlOSAG00000004794|intergenic_region|OS01G0125000-EPlOSAG00000004794|||n.1379635_1379640delAGCTAG||||||
chr01	1379645	GT	G	7534.98	0/0	0/0	0/0	0/0	1|1	0/0	1|1	1|1	0/0	1|1	0/0	0/0	1|1	0/0	0/0	0/0	0/0	0/0	0/0	1|1	0/0	0/0	0/0	0/0	G|intergenic_region|MODIFIER|OS01G0125000-EPlOSAG00000004794|OS01G0125000-EPlOSAG00000004794|intergenic_region|OS01G0125000-EPlOSAG00000004794|||n.1379646delT||||||
chr01	1379647	ACTAC	A	7444.98	0/0	0/0	0/0	0/0	1|1	0/0	1|1	1|1	0/0	1|1	0/0	0/0	1|1	0/0	0/0	0/0	0/0	0/0	0/0	1|1	0/0	0/0	0/0	0/0	A|intergenic_region|MODIFIER|OS01G0125000-EPlOSAG00000004794|OS01G0125000-EPlOSAG00000004794|intergenic_region|OS01G0125000-EPlOSAG00000004794|||n.1379648_1379651delCTAC||||||
chr01	1379654	GT	G	7399.98	0/0	0/0	0/0	0/0	1|1	0/0	1|1	1|1	0/0	1|1	0/0	0/0	1|1	0/0	0/0	0/0	0/0	0/0	0/0	1|1	0/0	0/0	0/0	0/0	G|intergenic_region|MODIFIER|OS01G0125000-EPlOSAG00000004794|OS01G0125000-EPlOSAG00000004794|intergenic_region|OS01G0125000-EPlOSAG00000004794|||n.1379655delT||||||
chr01	1379656	ACT	A	7309.98	0/0	0/0	0/0	0/0	1|1	0/0	1|1	1|1	0/0	1|1	0/0	0/0	1|1	0/0	0/0	0/0	0/0	0/0	0/0	1|1	0/0	0/0	0/0	0/0	A|intergenic_region|MODIFIER|OS01G0125000-EPlOSAG00000004794|OS01G0125000-EPlOSAG00000004794|intergenic_region|OS01G0125000-EPlOSAG00000004794|||n.1379657_1379658delCT||||||
chr01	1379661	AT	A	7309.98	0/0	0/0	0/0	0/0	1|1	0/0	1|1	1|1	0/0	1|1	0/0	0/0	1|1	0/0	0/0	0/0	0/0	0/0	0/0	1|1	0/0	0/0	0/0	0/0	A|intergenic_region|MODIFIER|OS01G0125000-EPlOSAG00000004794|OS01G0125000-EPlOSAG00000004794|intergenic_region|OS01G0125000-EPlOSAG00000004794|||n.1379662delT||||||
chr01	1379665	GGAAGC	G	7309.97	0/0	0/0	0/0	0/0	1|1	0/0	1|1	1|1	0/0	1|1	0/0	0/0	1|1	0/0	0/0	0/0	0/0	0/0	0/0	1|1	0/0	0/0	0/0	0/0	G|intergenic_region|MODIFIER|OS01G0125000-EPlOSAG00000004794|OS01G0125000-EPlOSAG00000004794|intergenic_region|OS01G0125000-EPlOSAG00000004794|||n.1379666_1379670delGAAGC||||||
chr01	1379674	AG	A	7264.98	0/0	0/0	0/0	0/0	1|1	0/0	1|1	1|1	0/0	1|1	0/0	0/0	1|1	0/0	0/0	0/0	0/0	0/0	0/0	1|1	0/0	0/0	0/0	0/0	A|intergenic_region|MODIFIER|OS01G0125000-EPlOSAG00000004794|OS01G0125000-EPlOSAG00000004794|intergenic_region|OS01G0125000-EPlOSAG00000004794|||n.1379675delG||||||
chr01	1379677	G	GCCTA	7793.01	0/0	0/0	0/0	0/0	1|1	0/0	1|1	1|1	0/0	1|1	0/0	0/0	1|1	0/0	0/0	0/0	0/0	0/0	0/0	1|1	0/0	0/0	0/0	0/0	GCCTA|intergenic_region|MODIFIER|OS01G0125000-EPlOSAG00000004794|OS01G0125000-EPlOSAG00000004794|intergenic_region|OS01G0125000-EPlOSAG00000004794|||n.1379677_1379678insCCTA||||||
chr01	1398582	AATGG	A	284.11	0/0	0/0	0/0	0/0	./.	0/0	./.	0/0	0/0	./.	0/0	0/0	1|1	0/0	0/0	0/0	0/0	0/0	0/0	./.	0/0	0/0	0/0	0/0	A|upstream_gene_variant|MODIFIER|OS01G0125500|OS01G0125500|transcript|OS01T0125500-00|protein_coding||c.-1761_-1758delCCAT|||||1758|WARNING_TRANSCRIPT_NO_START_CODON,A|intergenic_region|MODIFIER|OS01G0125500-OS01G0125550|OS01G0125500-OS01G0125550|intergenic_region|OS01G0125500-OS01G0125550|||n.1398583_1398586delATGG||||||
chr01	1398708	T	TG	7183.01	0/0	0/0	0/0	0/0	1|1	0/0	1|1	1|1	0/0	1|1	0/0	0/0	1|1	0/0	0/0	0/0	0/0	0/0	0/0	1|1	0/0	0/0	0/0	0/0	TG|upstream_gene_variant|MODIFIER|OS01G0125500|OS01G0125500|transcript|OS01T0125500-00|protein_coding||c.-1884_-1883insC|||||1884|WARNING_TRANSCRIPT_NO_START_CODON,TG|intergenic_region|MODIFIER|OS01G0125500-OS01G0125550|OS01G0125500-OS01G0125550|intergenic_region|OS01G0125500-OS01G0125550|||n.1398708_1398709insG||||||
chr01	1398757	GACTTAAATGTGTTCTTTCAACTCAACATAATCCAATTTGAGCCAACAAAATCAACAGAGGTAACAGCCGGCTGGCGGCAACGGTGAGAATATGGCGCTGTGGCAACTCACA	G	2616.1	0/0	0/0	0/0	0/0	1/1	0/0	./.	1/1	0/0	1/1	0/0	0/0	./.	0/0	0/0	0/0	0/0	0/0	0/0	./.	0/0	0/0	0/0	0/0	G|upstream_gene_variant|MODIFIER|OS01G0125500|OS01G0125500|transcript|OS01T0125500-00|protein_coding||c.-2043_-1933del|||||1933|WARNING_TRANSCRIPT_NO_START_CODON,G|intergenic_region|MODIFIER|OS01G0125500-OS01G0125550|OS01G0125500-OS01G0125550|intergenic_region|OS01G0125500-OS01G0125550|||n.1398758_1398868del||||||
chr01	1398946	A	ATGTAG	11324	0/0	0/0	0/0	0/0	1|1	0/0	1|1	1|1	0/0	1|1	0/0	0/0	1|1	0/0	0/0	0/0	0/0	0/0	0/0	1|1	0/0	0/0	0/0	0/0	ATGTAG|intergenic_region|MODIFIER|OS01G0125500-OS01G0125550|OS01G0125500-OS01G0125550|intergenic_region|OS01G0125500-OS01G0125550|||n.1398946_1398947insTGTAG||||||
chr01	1399012	A	AAGGCCAGATCCGAGGGGAGTCGGAGAAGAAAACTCCGATATGATTAGGCGC	8090.01	0/0	0/0	0/0	0/0	1/1	0/0	1/1	1/1	0/0	1/1	0/0	0/0	1/1	0/0	0/0	0/0	0/0	0/0	0/0	1/1	0/0	0/0	0/0	0/0	AAGGCCAGATCCGAGGGGAGTCGGAGAAGAAAACTCCGATATGATTAGGCGC|intergenic_region|MODIFIER|OS01G0125500-OS01G0125550|OS01G0125500-OS01G0125550|intergenic_region|OS01G0125500-OS01G0125550|||n.1399012_1399013insAGGCCAGATCCGAGGGGAGTCGGAGAAGAAAACTCCGATATGATTAGGCGC||||||
chr01	1399860	TCCAGCAGCCGTG	T	5880.98	0/0	0/0	0/0	0/0	1/1	0/0	1/1	1/1	0/0	1/1	0/0	0/0	1/1	0/0	0/0	0/0	0/0	0/0	0/0	1/1	0/0	0/0	0/0	0/0	T|downstream_gene_variant|MODIFIER|OS01G0125550|OS01G0125550|transcript|OS01T0125550-01|protein_coding||c.*2502_*2513delCACGGCTGCTGG|||||1558|,T|intergenic_region|MODIFIER|OS01G0125500-OS01G0125550|OS01G0125500-OS01G0125550|intergenic_region|OS01G0125500-OS01G0125550|||n.1399861_1399872delCCAGCAGCCGTG||||||
chr01	1400147	CA	C	13124	0/0	0/0	0/0	0/0	1|1	0/0	1|1	1|1	0/0	1|1	0/0	0/0	1|1	0/0	0/0	0/0	0/0	0/0	0/0	1|1	0/0	0/0	0/0	0/0	C|downstream_gene_variant|MODIFIER|OS01G0125550|OS01G0125550|transcript|OS01T0125550-01|protein_coding||c.*2226delT|||||1271|,C|intergenic_region|MODIFIER|OS01G0125500-OS01G0125550|OS01G0125500-OS01G0125550|intergenic_region|OS01G0125500-OS01G0125550|||n.1400148delA||||||
chr01	1400153	TCTGTATGA	T	13324	0/0	0/0	0/0	0/0	1|1	0/0	1|1	1|1	0/0	1|1	0/0	0/0	1|1	0/0	0/0	0/0	0/0	0/0	0/0	1|1	0/0	0/0	0/0	0/0	T|downstream_gene_variant|MODIFIER|OS01G0125550|OS01G0125550|transcript|OS01T0125550-01|protein_coding||c.*2213_*2220delTCATACAG|||||1265|,T|intergenic_region|MODIFIER|OS01G0125500-OS01G0125550|OS01G0125500-OS01G0125550|intergenic_region|OS01G0125500-OS01G0125550|||n.1400154_1400161delCTGTATGA||||||
chr01	1400281	T	TCCATCTACACTTTAAAACGCCTCAAGGCATGAGGCGAGAGAGC	1274.68	0/0	0/0	0/0	0/0	./.	0/0	./.	./.	0/0	./.	0/0	0/0	1|1	0/0	0/0	0/0	0/0	0/0	0/0	./.	0/0	0/0	0/0	0/0	TCCATCTACACTTTAAAACGCCTCAAGGCATGAGGCGAGAGAGC|downstream_gene_variant|MODIFIER|OS01G0125550|OS01G0125550|transcript|OS01T0125550-01|protein_coding||c.*2092_*2093insGCTCTCTCGCCTCATGCCTTGAGGCGTTTTAAAGTGTAGATGG|||||1137|,TCCATCTACACTTTAAAACGCCTCAAGGCATGAGGCGAGAGAGC|intergenic_region|MODIFIER|OS01G0125500-OS01G0125550|OS01G0125500-OS01G0125550|intergenic_region|OS01G0125500-OS01G0125550|||n.1400281_14…
chr01	1400284	G	GC	514.67	0/0	0/0	0/0	0/0	./.	0/0	./.	./.	0/0	./.	0/0	0/0	1|1	0/0	0/0	0/0	0/0	0/0	0/0	./.	0/0	0/0	0/0	0/0	GC|downstream_gene_variant|MODIFIER|OS01G0125550|OS01G0125550|transcript|OS01T0125550-01|protein_coding||c.*2089_*2090insG|||||1134|,GC|intergenic_region|MODIFIER|OS01G0125500-OS01G0125550|OS01G0125500-OS01G0125550|intergenic_region|OS01G0125500-OS01G0125550|||n.1400284_1400285insC||||||
chr01	1400287	T	TTGCCG	379.61	0/0	0/0	0/0	0/0	./.	0/0	./.	./.	0/0	./.	0/0	0/0	1|1	0/0	0/0	0/0	0/0	0/0	0/0	./.	0/0	0/0	0/0	0/0	TTGCCG|downstream_gene_variant|MODIFIER|OS01G0125550|OS01G0125550|transcript|OS01T0125550-01|protein_coding||c.*2086_*2087insCGGCA|||||1131|,TTGCCG|intergenic_region|MODIFIER|OS01G0125500-OS01G0125550|OS01G0125500-OS01G0125550|intergenic_region|OS01G0125500-OS01G0125550|||n.1400287_1400288insTGCCG||||||
chr01	1400288	A	ACTGCCTTCCGGCTAC	379.61	0/0	0/0	0/0	0/0	./.	0/0	./.	./.	0/0	./.	0/0	0/0	1|1	0/0	0/0	0/0	0/0	0/0	0/0	./.	0/0	0/0	0/0	0/0	ACTGCCTTCCGGCTAC|downstream_gene_variant|MODIFIER|OS01G0125550|OS01G0125550|transcript|OS01T0125550-01|protein_coding||c.*2085_*2086insGTAGCCGGAAGGCAG|||||1130|,ACTGCCTTCCGGCTAC|intergenic_region|MODIFIER|OS01G0125500-OS01G0125550|OS01G0125500-OS01G0125550|intergenic_region|OS01G0125500-OS01G0125550|||n.1400288_1400289insCTGCCTTCCGGCTAC||||||
chr01	1400615	GTA	G	6864.98	0/0	0/0	0/0	0/0	1|1	0/0	1|1	1|1	0/0	1|1	0/0	0/0	1|1	0/0	0/0	0/0	0/0	0/0	0/0	1|1	0/0	0/0	0/0	0/0	G|downstream_gene_variant|MODIFIER|OS01G0125550|OS01G0125550|transcript|OS01T0125550-01|protein_coding||c.*1757_*1758delTA|||||803|,G|intergenic_region|MODIFIER|OS01G0125500-OS01G0125550|OS01G0125500-OS01G0125550|intergenic_region|OS01G0125500-OS01G0125550|||n.1400616_1400617delTA||||||
chr01	1400769	CA	C	7238.96	0/0	0/0	0/0	0/0	1|1	0/0	1|1	1|1	0/0	1|1	0/0	0/0	1|1	0/0	0/0	0/0	0/0	0/0	0/0	1|1	0/0	0/0	0/0	0/0	C|downstream_gene_variant|MODIFIER|OS01G0125550|OS01G0125550|transcript|OS01T0125550-01|protein_coding||c.*1604delT|||||649|,C|intergenic_region|MODIFIER|OS01G0125500-OS01G0125550|OS01G0125500-OS01G0125550|intergenic_region|OS01G0125500-OS01G0125550|||n.1400770delA||||||
chr01	1400795	G	GCTGCA	8994.01	0/0	0/0	0/0	0/0	1|1	0/0	1|1	1|1	0/0	1|1	0/0	0/0	1|1	0/0	0/0	0/0	0/0	0/0	0/0	1|1	0/0	0/0	0/0	0/0	GCTGCA|downstream_gene_variant|MODIFIER|OS01G0125550|OS01G0125550|transcript|OS01T0125550-01|protein_coding||c.*1578_*1579insTGCAG|||||623|,GCTGCA|intergenic_region|MODIFIER|OS01G0125500-OS01G0125550|OS01G0125500-OS01G0125550|intergenic_region|OS01G0125500-OS01G0125550|||n.1400795_1400796insCTGCA||||||
chr01	1401019	ACC	A	10546	0/0	0/0	0/0	0/0	1/1	0/0	1/1	1/1	0/0	1/1	0/0	0/0	1/1	0/0	0/0	0/0	0/0	0/0	0/0	1/1	0/0	0/0	0/0	0/0	A|downstream_gene_variant|MODIFIER|OS01G0125550|OS01G0125550|transcript|OS01T0125550-01|protein_coding||c.*1353_*1354delGG|||||399|,A|intergenic_region|MODIFIER|OS01G0125500-OS01G0125550|OS01G0125500-OS01G0125550|intergenic_region|OS01G0125500-OS01G0125550|||n.1401020_1401021delCC||||||
chr01	1401161	T	TGGA	16968	0/0	0/0	0/0	0/0	1/1	0/0	1/1	1/1	0/0	1/1	0/0	0/0	1/1	0/0	0/0	0/0	0/0	0/0	0/0	1/1	0/0	0/0	0/0	0/0	TGGA|downstream_gene_variant|MODIFIER|OS01G0125550|OS01G0125550|transcript|OS01T0125550-01|protein_coding||c.*1212_*1213insTCC|||||257|,TGGA|intergenic_region|MODIFIER|OS01G0125500-OS01G0125550|OS01G0125500-OS01G0125550|intergenic_region|OS01G0125500-OS01G0125550|||n.1401161_1401162insGGA||||||
chr01	1401282	CAT	C	14950	0/0	0/0	0/0	0/0	1/1	0/0	1/1	1/1	0/0	1/1	0/0	0/0	1/1	0/0	0/0	0/0	0/0	0/0	0/0	1/1	0/0	0/0	0/0	0/0	C|downstream_gene_variant|MODIFIER|OS01G0125550|OS01G0125550|transcript|OS01T0125550-01|protein_coding||c.*1090_*1091delAT|||||136|,C|intergenic_region|MODIFIER|OS01G0125500-OS01G0125550|OS01G0125500-OS01G0125550|intergenic_region|OS01G0125500-OS01G0125550|||n.1401283_1401284delAT||||||
chr01	1402256	C	CT	5571.93	0/0	0/0	0/0	0/0	1/1	0/0	1/1	1/1	0/0	1/1	0/0	0/0	1/1	0/0	0/0	0/0	0/0	0/0	0/0	1/1	0/0	0/0	0/0	0/0	CT|3_prime_UTR_variant|MODIFIER|OS01G0125550|OS01G0125550|transcript|OS01T0125550-01|protein_coding|2/2|c.*117dupA|||||117|
chr01	1404909	T	TC	10232	0/0	0/0	0/0	0/0	1|1	0/0	1|1	1|1	0/0	1|1	0/0	0/0	1|1	0/0	0/0	0/0	0/0	0/0	0/0	1|1	0/0	0/0	0/0	0/0	TC|5_prime_UTR_variant|MODIFIER|OS01G0125600|OS01G0125600|transcript|OS01T0125600-01|protein_coding|1/3|c.-50dupC|||||49|INFO_REALIGN_3_PRIME,TC|upstream_gene_variant|MODIFIER|OS01G0125550|OS01G0125550|transcript|OS01T0125550-01|protein_coding||c.-1523dupG|||||1491|,TC|upstream_gene_variant|MODIFIER|EPlOSAG00000034222|EPlOSAG00000034222|transcript|EPlOSAT00000035610|lincRNA||n.-457dupG|||||457|,T…
chr01	1409001	G	GA	12705	0/0	0/0	0/0	0/0	1|1	0/0	1|1	1|1	0/0	1|1	0/0	0/0	1|1	0/0	0/0	0/0	0/0	0/0	0/0	1|1	0/0	0/0	0/0	0/0	GA|downstream_gene_variant|MODIFIER|OS01G0125700|OS01G0125700|transcript|OS01T0125700-01|protein_coding||c.*2135_*2136insT|||||1985|,GA|intergenic_region|MODIFIER|OS01G0125600-OS01G0125700|OS01G0125600-OS01G0125700|intergenic_region|OS01G0125600-OS01G0125700|||n.1409001_1409002insA||||||
chr01	1412984	GA	G	4725.97	0/0	0/0	0/0	0/0	1|1	0/0	1|1	1|1	0/0	1|1	0/0	0/0	1|1	0/0	0/0	0/0	0/0	0/0	0/0	1|1	0/0	0/0	0/0	0/0	G|5_prime_UTR_variant|MODIFIER|OS01G0125700|OS01G0125700|transcript|OS01T0125700-01|protein_coding|1/2|c.-52delT|||||52|,G|upstream_gene_variant|MODIFIER|EPlOSAG00000023548|EPlOSAG00000023548|transcript|EPlOSAT00000024936|lincRNA||n.-1363delT|||||1363|,G|upstream_gene_variant|MODIFIER|OS01G0125800|OS01G0125800|transcript|OS01T0125800-01|protein_coding||c.-933delA|||||854|,G|downstream_gene_varian…
chr01	1412990	GAA	G	4654.97	0/0	0/0	0/0	0/0	1|1	0/0	1|1	1|1	0/0	1|1	0/0	0/0	1|1	0/0	0/0	0/0	0/0	0/0	0/0	1|1	0/0	0/0	0/0	0/0	G|5_prime_UTR_variant|MODIFIER|OS01G0125700|OS01G0125700|transcript|OS01T0125700-01|protein_coding|1/2|c.-59_-58delTT|||||58|,G|upstream_gene_variant|MODIFIER|EPlOSAG00000023548|EPlOSAG00000023548|transcript|EPlOSAT00000024936|lincRNA||n.-1370_-1369delTT|||||1369|,G|upstream_gene_variant|MODIFIER|OS01G0125800|OS01G0125800|transcript|OS01T0125800-01|protein_coding||c.-927_-926delAA|||||848|,G|down…
chr01	1412994	AAGCTGACAC	A	4498.92	0/0	0/0	0/0	0/0	1|1	0/0	1|1	1|1	0/0	1|1	0/0	0/0	1|1	0/0	0/0	0/0	0/0	0/0	0/0	1|1	0/0	0/0	0/0	0/0	A|5_prime_UTR_variant|MODIFIER|OS01G0125700|OS01G0125700|transcript|OS01T0125700-01|protein_coding|1/2|c.-70_-62delGTGTCAGCT|||||62|,A|upstream_gene_variant|MODIFIER|EPlOSAG00000023548|EPlOSAG00000023548|transcript|EPlOSAT00000024936|lincRNA||n.-1381_-1373delGTGTCAGCT|||||1373|,A|upstream_gene_variant|MODIFIER|OS01G0125800|OS01G0125800|transcript|OS01T0125800-01|protein_coding||c.-923_-915delAGCT…
chr01	1413436	G	GT	7096.01	0/0	0/0	0/0	0/0	1/1	0/0	1/1	1/1	0/0	1/1	0/0	0/0	1/1	0/0	0/0	0/0	0/0	0/0	0/0	1/1	0/0	0/0	0/0	0/0	GT|upstream_gene_variant|MODIFIER|OS01G0125700|OS01G0125700|transcript|OS01T0125700-01|protein_coding||c.-504_-503insA|||||344|,GT|upstream_gene_variant|MODIFIER|EPlOSAG00000023548|EPlOSAG00000023548|transcript|EPlOSAT00000024936|lincRNA||n.-1815_-1814insA|||||1815|,GT|upstream_gene_variant|MODIFIER|OS01G0125800|OS01G0125800|transcript|OS01T0125800-01|protein_coding||c.-482_-481insT|||||402|,GT|d…
chr01	1415240	T	TA	7723.01	0/0	0/0	0/0	0/0	1/1	0/0	1/1	1/1	0/0	1/1	0/0	0/0	1/1	0/0	0/0	0/0	0/0	0/0	0/0	1/1	0/0	0/0	0/0	0/0	TA|intron_variant|MODIFIER|OS01G0125800|OS01G0125800|transcript|OS01T0125800-01|protein_coding|2/5|c.554+234_554+235insA||||||,TA|intron_variant|MODIFIER|OS01G0125850|OS01G0125850|transcript|OS01T0125850-00|protein_coding|4/5|c.-70-237_-70-236insT||||||
chr01	1418743	A	AT	3132.83	0/0	1/1	0/0	0/0	0/0	1/1	0/0	0/0	0/0	0/0	0/0	0/0	0/0	0/0	0/0	0/0	0/0	0/0	0/0	0/0	0/0	0/0	0/0	0/0	AT|3_prime_UTR_variant|MODIFIER|OS01G0125800|OS01G0125800|transcript|OS01T0125800-01|protein_coding|6/6|c.*96dupT|||||97|INFO_REALIGN_3_PRIME,AT|upstream_gene_variant|MODIFIER|OS01G0125850|OS01G0125850|transcript|OS01T0125850-00|protein_coding||c.-3810dupA|||||82|,AT|upstream_gene_variant|MODIFIER|EPlOSAG00000039227|EPlOSAG00000039227|transcript|EPlOSAT00000040615|lincRNA||n.-1171_-1170insT|||||1…
chr01	1420017	GTTATAACCA	G	9041.98	0/0	0/0	0/0	0/0	1/1	0/0	1/1	1/1	0/0	1/1	0/0	0/0	1/1	0/0	0/0	0/0	0/0	0/0	0/0	1/1	0/0	0/0	0/0	0/0	G|upstream_gene_variant|MODIFIER|OS01G0125850|OS01G0125850|transcript|OS01T0125850-00|protein_coding||c.-5092_-5084delTGGTTATAA|||||1356|,G|upstream_gene_variant|MODIFIER|EPlOSAG00000041360|EPlOSAG00000041360|transcript|EPlOSAT00000042748|lincRNA||n.-9_-1delTGGTTATAA|||||1|,G|upstream_gene_variant|MODIFIER|OS01G0125900|OS01G0125900|transcript|OS01T0125900-01|protein_coding||c.-3326_-3318delTTATAA…
chr01	1420196	C	CATATATTAATATG	7405.01	0/0	0/0	0/0	0/0	1|1	0/0	1|1	1|1	0/0	1|1	0/0	0/0	1|1	0/0	0/0	0/0	0/0	0/0	0/0	1|1	0/0	0/0	0/0	0/0	CATATATTAATATG|upstream_gene_variant|MODIFIER|OS01G0125850|OS01G0125850|transcript|OS01T0125850-00|protein_coding||c.-5263_-5262insCATATTAATATAT|||||1535|,CATATATTAATATG|upstream_gene_variant|MODIFIER|EPlOSAG00000041360|EPlOSAG00000041360|transcript|EPlOSAT00000042748|lincRNA||n.-180_-179insCATATTAATATAT|||||180|,CATATATTAATATG|upstream_gene_variant|MODIFIER|OS01G0125900|OS01G0125900|transcript|O…
chr01	1420224	TAAA	T	7385.98	0/0	0/0	0/0	0/0	1|1	0/0	1|1	1|1	0/0	1|1	0/0	0/0	1|1	0/0	0/0	0/0	0/0	0/0	0/0	1|1	0/0	0/0	0/0	0/0	T|upstream_gene_variant|MODIFIER|OS01G0125850|OS01G0125850|transcript|OS01T0125850-00|protein_coding||c.-5293_-5291delTTT|||||1563|,T|upstream_gene_variant|MODIFIER|EPlOSAG00000041360|EPlOSAG00000041360|transcript|EPlOSAT00000042748|lincRNA||n.-210_-208delTTT|||||208|,T|upstream_gene_variant|MODIFIER|OS01G0125900|OS01G0125900|transcript|OS01T0125900-01|protein_coding||c.-3119_-3117delAAA|||||1468…
chr01	1420356	G	GT	3059.01	0/0	0/0	0/0	0/0	1/1	0/0	1/1	1/1	0/0	1/1	0/0	0/0	1/1	0/0	0/0	0/0	0/0	0/0	0/0	1/1	0/0	0/0	0/0	0/0	GT|upstream_gene_variant|MODIFIER|OS01G0125850|OS01G0125850|transcript|OS01T0125850-00|protein_coding||c.-5423_-5422insA|||||1695|,GT|upstream_gene_variant|MODIFIER|EPlOSAG00000041360|EPlOSAG00000041360|transcript|EPlOSAT00000042748|lincRNA||n.-340_-339insA|||||340|,GT|upstream_gene_variant|MODIFIER|OS01G0125900|OS01G0125900|transcript|OS01T0125900-01|protein_coding||c.-2988_-2987insT|||||1336|,G…
chr01	1420395	GTGTA	G	4972.98	0/0	0/0	0/0	0/0	1|1	0/0	1|1	1|1	0/0	1|1	0/0	0/0	1|1	0/0	0/0	0/0	0/0	0/0	0/0	1|1	0/0	0/0	0/0	0/0	G|upstream_gene_variant|MODIFIER|OS01G0125850|OS01G0125850|transcript|OS01T0125850-00|protein_coding||c.-5465_-5462delTACA|||||1734|,G|upstream_gene_variant|MODIFIER|EPlOSAG00000041360|EPlOSAG00000041360|transcript|EPlOSAT00000042748|lincRNA||n.-382_-379delTACA|||||379|,G|upstream_gene_variant|MODIFIER|OS01G0125900|OS01G0125900|transcript|OS01T0125900-01|protein_coding||c.-2948_-2945delTGTA|||||1…
chr01	1420848	A	AT	560.33	0/0	0/0	0/0	0/0	./.	0/0	./.	./.	0/0	./.	0/0	0/0	./.	0/0	0/0	0/0	0/0	0/0	0/0	1|1	0/0	0/0	0/0	0/0	AT|upstream_gene_variant|MODIFIER|EPlOSAG00000041360|EPlOSAG00000041360|transcript|EPlOSAT00000042748|lincRNA||n.-832_-831insA|||||832|,AT|upstream_gene_variant|MODIFIER|OS01G0125900|OS01G0125900|transcript|OS01T0125900-01|protein_coding||c.-2496_-2495insT|||||844|,AT|downstream_gene_variant|MODIFIER|OS01G0125800|OS01G0125800|transcript|OS01T0125800-01|protein_coding||c.*2194_*2195insT|||||1867|,…
chr01	1421153	T	TTGA	11910	0/0	0/0	0/0	0/0	1/1	0/0	1/1	1/1	0/0	1/1	0/0	0/0	1/1	0/0	0/0	0/0	0/0	0/0	0/0	1/1	0/0	0/0	0/0	0/0	TTGA|upstream_gene_variant|MODIFIER|EPlOSAG00000041360|EPlOSAG00000041360|transcript|EPlOSAT00000042748|lincRNA||n.-1137_-1136insTCA|||||1137|,TTGA|upstream_gene_variant|MODIFIER|OS01G0125900|OS01G0125900|transcript|OS01T0125900-01|protein_coding||c.-2191_-2190insTGA|||||539|,TTGA|downstream_gene_variant|MODIFIER|EPlOSAG00000039227|EPlOSAG00000039227|transcript|EPlOSAT00000040615|lincRNA||n.*1136…
chr01	1421363	AT	A	8451.98	0/0	0/0	0/0	0/0	1/1	0/0	1/1	1/1	0/0	1/1	0/0	0/0	1/1	0/0	0/0	0/0	0/0	0/0	0/0	1/1	0/0	0/0	0/0	0/0	A|upstream_gene_variant|MODIFIER|EPlOSAG00000041360|EPlOSAG00000041360|transcript|EPlOSAT00000042748|lincRNA||n.-1347delA|||||1347|,A|upstream_gene_variant|MODIFIER|OS01G0125900|OS01G0125900|transcript|OS01T0125900-01|protein_coding||c.-1980delT|||||329|,A|downstream_gene_variant|MODIFIER|EPlOSAG00000039227|EPlOSAG00000039227|transcript|EPlOSAT00000040615|lincRNA||n.*1347delT|||||1347|,A|intergen…
chr01	1421697	GTC	G	5173.34	0/0	0/0	0/0	./.	1/1	0/0	1/1	1/1	0/0	1/1	0/0	0/0	1/1	0/0	0/0	0/0	0/0	0/0	0/0	1/1	./.	0/0	0/0	0/0	G|5_prime_UTR_variant|MODIFIER|OS01G0125900|OS01G0125900|transcript|OS01T0125900-01|protein_coding|1/9|c.-240_-239delCT|||||1630|INFO_REALIGN_3_PRIME,G|upstream_gene_variant|MODIFIER|EPlOSAG00000041360|EPlOSAG00000041360|transcript|EPlOSAT00000042748|lincRNA||n.-1682_-1681delGA|||||1681|,G|downstream_gene_variant|MODIFIER|EPlOSAG00000039227|EPlOSAG00000039227|transcript|EPlOSAT00000040615|lincRNA…
chr01	1431112	G	GT	8018.01	0/0	0/0	0/0	0/0	1/1	0/0	1/1	1/1	0/0	1/1	0/0	0/0	1/1	0/0	0/0	0/0	0/0	0/0	0/0	1/1	0/0	0/0	0/0	0/0	GT|intergenic_region|MODIFIER|EPlOSAG00000014965-OS01G0126000|EPlOSAG00000014965-OS01G0126000|intergenic_region|EPlOSAG00000014965-OS01G0126000|||n.1431112_1431113insT||||||
chr01	1432154	T	TC	6869.01	0/0	0/0	0/0	0/0	1/1	0/0	1/1	1/1	0/0	1/1	0/0	0/0	1/1	0/0	0/0	0/0	0/0	0/0	0/0	1/1	0/0	0/0	0/0	0/0	TC|upstream_gene_variant|MODIFIER|OS01G0126100|OS01G0126100|transcript|OS01T0126100-01|protein_coding||c.-1930_-1929insC|||||1841|,TC|downstream_gene_variant|MODIFIER|OS01G0126000|OS01G0126000|transcript|OS01T0126000-01|protein_coding||c.*2385_*2386insG|||||1600|WARNING_TRANSCRIPT_NO_START_CODON,TC|intergenic_region|MODIFIER|EPlOSAG00000014965-OS01G0126000|EPlOSAG00000014965-OS01G0126000|intergen…
chr01	1435908	TTAACTTTCTCTGCCACTTAATAA	T	9175.98	0/0	0/0	0/0	0/0	1|1	0/0	1|1	1|1	0/0	1|1	0/0	0/0	1|1	0/0	0/0	0/0	0/0	0/0	0/0	1/1	0/0	0/0	0/0	0/0	T|upstream_gene_variant|MODIFIER|OS01G0126000|OS01G0126000|transcript|OS01T0126000-01|protein_coding||c.-978_-956delTTATTAAGTGGCAGAGAAAGTTA|||||954|WARNING_TRANSCRIPT_NO_START_CODON,T|upstream_gene_variant|MODIFIER|OS01G0126200|OS01G0126200|transcript|OS01T0126200-01|protein_coding||c.-1437_-1415delTAACTTTCTCTGCCACTTAATAA|||||1254|,T|intron_variant|MODIFIER|OS01G0126100|OS01G0126100|transcript|OS…
chr01	1435975	AT	A	8997.98	0/0	0/0	0/0	0/0	1|1	0/0	1|1	1|1	0/0	1|1	0/0	0/0	1|1	0/0	0/0	0/0	0/0	0/0	0/0	1/1	0/0	0/0	0/0	0/0	A|upstream_gene_variant|MODIFIER|OS01G0126000|OS01G0126000|transcript|OS01T0126000-01|protein_coding||c.-1023delA|||||1021|WARNING_TRANSCRIPT_NO_START_CODON,A|upstream_gene_variant|MODIFIER|OS01G0126200|OS01G0126200|transcript|OS01T0126200-01|protein_coding||c.-1370delT|||||1187|,A|intron_variant|MODIFIER|OS01G0126100|OS01G0126100|transcript|OS01T0126100-01|protein_coding|2/2|c.1695+87delT||||||
chr01	1436142	TAA	T	10640	0/0	0/0	0/0	0/0	1|1	0/0	1|1	1|1	0/0	1|1	0/0	0/0	1|1	0/0	0/0	0/0	0/0	0/0	0/0	1|1	0/0	0/0	0/0	0/0	T|upstream_gene_variant|MODIFIER|OS01G0126000|OS01G0126000|transcript|OS01T0126000-01|protein_coding||c.-1191_-1190delTT|||||1188|WARNING_TRANSCRIPT_NO_START_CODON,T|upstream_gene_variant|MODIFIER|OS01G0126200|OS01G0126200|transcript|OS01T0126200-01|protein_coding||c.-1203_-1202delAA|||||1020|,T|intron_variant|MODIFIER|OS01G0126100|OS01G0126100|transcript|OS01T0126100-01|protein_coding|2/2|c.1695…
chr01	1436709	C	CTA	13651	0/0	0/0	0/0	0/0	1|1	0/0	1|1	1|1	0/0	1|1	0/0	0/0	1|1	0/0	0/0	0/0	0/0	0/0	0/0	1|1	0/0	0/0	0/0	0/0	CTA|3_prime_UTR_variant|MODIFIER|OS01G0126100|OS01G0126100|transcript|OS01T0126100-01|protein_coding|3/3|c.*215_*216dupAT|||||217|INFO_REALIGN_3_PRIME,CTA|upstream_gene_variant|MODIFIER|OS01G0126000|OS01G0126000|transcript|OS01T0126000-01|protein_coding||c.-1758_-1757dupTA|||||1755|WARNING_TRANSCRIPT_NO_START_CODON,CTA|upstream_gene_variant|MODIFIER|OS01G0126200|OS01G0126200|transcript|OS01T01262…
chr01	1436931	C	CA	5424.78	0/0	0/0	0/0	0/0	1/1	0/0	1/1	1/1	0/0	1/1	0/0	0/0	1/1	0/0	0/0	0/0	0/0	0/0	0/0	1/1	0/0	0/0	0/0	0/0	CA|upstream_gene_variant|MODIFIER|OS01G0126000|OS01G0126000|transcript|OS01T0126000-01|protein_coding||c.-1979_-1978insT|||||1977|WARNING_TRANSCRIPT_NO_START_CODON,CA|upstream_gene_variant|MODIFIER|OS01G0126200|OS01G0126200|transcript|OS01T0126200-01|protein_coding||c.-415_-414insA|||||231|,CA|downstream_gene_variant|MODIFIER|OS01G0126100|OS01G0126100|transcript|OS01T0126100-01|protein_coding||c.…
chr01	1437189	AT	A	7960.98	0/0	0/0	0/0	0/0	1/1	0/0	1/1	1/1	0/0	1/1	0/0	0/0	1/1	0/0	0/0	0/0	0/0	0/0	0/0	1/1	0/0	0/0	0/0	0/0	A|5_prime_UTR_variant|MODIFIER|OS01G0126200|OS01G0126200|transcript|OS01T0126200-01|protein_coding|1/3|c.-147delT|||||147|INFO_REALIGN_3_PRIME,A|downstream_gene_variant|MODIFIER|OS01G0126100|OS01G0126100|transcript|OS01T0126100-01|protein_coding||c.*694delT|||||381|
chr01	1438016	C	CT	10620	0/0	0/0	0/0	0/0	1/1	0/0	1/1	1/1	0/0	1/1	0/0	0/0	1/1	0/0	0/0	0/0	0/0	0/0	0/0	1/1	0/0	0/0	0/0	0/0	CT|downstream_gene_variant|MODIFIER|OS01G0126100|OS01G0126100|transcript|OS01T0126100-01|protein_coding||c.*1520_*1521insT|||||1208|,CT|intron_variant|MODIFIER|OS01G0126200|OS01G0126200|transcript|OS01T0126200-01|protein_coding|1/2|c.237+434_237+435insT||||||
chr01	1438220	G	GA	9972.01	0/0	0/0	0/0	0/0	1/1	0/0	1/1	1/1	0/0	1/1	0/0	0/0	1/1	0/0	0/0	0/0	0/0	0/0	0/0	1/1	0/0	0/0	0/0	0/0	GA|downstream_gene_variant|MODIFIER|OS01G0126100|OS01G0126100|transcript|OS01T0126100-01|protein_coding||c.*1724_*1725insA|||||1412|,GA|intron_variant|MODIFIER|OS01G0126200|OS01G0126200|transcript|OS01T0126200-01|protein_coding|1/2|c.237+638_237+639insA||||||
chr01	1443618	AGTAATTTT	A	5944.97	0/0	0/0	0/0	0/0	1|1	0/0	1|1	1|1	0/0	1|1	0/0	0/0	1|1	0/0	0/0	0/0	0/0	0/0	0/0	1|1	0/0	0/0	0/0	0/0	A|downstream_gene_variant|MODIFIER|EPlOSAG00000032230|EPlOSAG00000032230|transcript|EPlOSAT00000033618|lincRNA||n.*95_*102delGTAATTTT|||||95|,A|downstream_gene_variant|MODIFIER|EPlOSAG00000050633|EPlOSAG00000050633|transcript|EPlOSAT00000052021|lincRNA||n.*97_*104delGTAATTTT|||||97|,A|downstream_gene_variant|MODIFIER|OS01G0126401|OS01G0126401|transcript|OS01T0126401-01|protein_coding||c.*2196_*22…
chr01	1443690	G	GTT	2759.03	0/0	0/0	0/0	0/0	0/0	0/0	1/1	1/1	0/0	1/1	0/0	0/0	1/1	0/0	0/0	0/0	0/0	0/0	0/0	1/1	0/0	0/0	0/0	0/0	GTT|downstream_gene_variant|MODIFIER|EPlOSAG00000032230|EPlOSAG00000032230|transcript|EPlOSAT00000033618|lincRNA||n.*166_*167insTT|||||167|,GTT|downstream_gene_variant|MODIFIER|EPlOSAG00000050633|EPlOSAG00000050633|transcript|EPlOSAT00000052021|lincRNA||n.*168_*169insTT|||||169|,GTT|downstream_gene_variant|MODIFIER|OS01G0126401|OS01G0126401|transcript|OS01T0126401-01|protein_coding||c.*2131_*2132…
chr01	1445470	ATGTGAGCCCCACCGCT	A	15079	0/0	0/0	0/0	0/0	1|1	0/0	1|1	1|1	0/0	1|1	0/0	0/0	1|1	0/0	0/0	0/0	0/0	0/0	0/0	1/1	0/0	0/0	0/0	0/0	A|3_prime_UTR_variant|MODIFIER|OS01G0126200|OS01G0126200|transcript|OS01T0126200-01|protein_coding|3/3|c.*110_*125delAGCCCCACCGCTTGTG|||||110|INFO_REALIGN_3_PRIME,A|downstream_gene_variant|MODIFIER|EPlOSAG00000032230|EPlOSAG00000032230|transcript|EPlOSAT00000033618|lincRNA||n.*1947_*1962delTGTGAGCCCCACCGCT|||||1947|,A|downstream_gene_variant|MODIFIER|EPlOSAG00000050633|EPlOSAG00000050633|transcri…
chr01	1445928	TTC	T	5232.97	0/0	0/0	0/0	0/0	1|1	0/0	1|1	1|1	0/0	1|1	0/0	0/0	1|1	0/0	0/0	0/0	0/0	0/0	0/0	1|1	0/0	0/0	0/0	0/0	T|frameshift_variant|HIGH|OS01G0126401|OS01G0126401|transcript|OS01T0126401-01|protein_coding|1/1|c.390_391delGA|p.Lys131fs|3522/3910|390/498|130/165||,T|upstream_gene_variant|MODIFIER|OS01G0126600|OS01G0126600|transcript|OS01T0126600-01|protein_coding||c.-1763_-1762delTC|||||1761|WARNING_TRANSCRIPT_NO_START_CODON,T|downstream_gene_variant|MODIFIER|OS01G0126200|OS01G0126200|transcript|OS01T012620…
chr01	1445953	G	GTC	1523.26	0/0	0/0	0/0	0/0	1/1	0/0	1/1	.	0/0	1/1	0/0	0/0	1/1	0/0	0/0	0/0	0/0	0/0	0/0	0/0	0/0	0/0	0/0	0/0	GTC|frameshift_variant|HIGH|OS01G0126401|OS01G0126401|transcript|OS01T0126401-01|protein_coding|1/1|c.365_366dupGA|p.Gln123fs|3497/3910|366/498|122/165||,GTC|upstream_gene_variant|MODIFIER|OS01G0126600|OS01G0126600|transcript|OS01T0126600-01|protein_coding||c.-1739_-1738insTC|||||1736|WARNING_TRANSCRIPT_NO_START_CODON,GTC|downstream_gene_variant|MODIFIER|OS01G0126200|OS01G0126200|transcript|OS01T…
chr01	1446012	GTGGTCGAC	G	7818.92	0/0	0/0	0/0	0/0	1/1	0/0	1/1	1/1	0/0	1/1	0/0	0/0	1/1	0/0	0/0	0/0	0/0	0/0	0/0	1/1	0/0	0/0	0/0	0/0	G|frameshift_variant|HIGH|OS01G0126401|OS01G0126401|transcript|OS01T0126401-01|protein_coding|1/1|c.300_307delGTCGACCA|p.Gln100fs|3438/3910|300/498|100/165||,G|upstream_gene_variant|MODIFIER|OS01G0126600|OS01G0126600|transcript|OS01T0126600-01|protein_coding||c.-1679_-1672delTGGTCGAC|||||1677|WARNING_TRANSCRIPT_NO_START_CODON,G|downstream_gene_variant|MODIFIER|OS01G0126200|OS01G0126200|transcript…
chr01	1446199	A	ACGG	9923.01	0/0	0/0	0/0	0/0	1/1	0/0	1/1	1/1	0/0	1/1	0/0	0/0	1/1	0/0	0/0	0/0	0/0	0/0	0/0	1/1	0/0	0/0	0/0	0/0	ACGG|conservative_inframe_insertion|MODERATE|OS01G0126401|OS01G0126401|transcript|OS01T0126401-01|protein_coding|1/1|c.118_120dupCCG|p.Pro40dup|3251/3910|120/498|40/165||,ACGG|upstream_gene_variant|MODIFIER|OS01G0126600|OS01G0126600|transcript|OS01T0126600-01|protein_coding||c.-1493_-1492insCGG|||||1490|WARNING_TRANSCRIPT_NO_START_CODON,ACGG|downstream_gene_variant|MODIFIER|OS01G0126200|OS01G0126…
chr01	1449448	CTTGCACAATGTCTGCACG	C	13232	0/0	0/0	0/0	0/0	1/1	0/0	1/1	1/1	0/0	1/1	0/0	0/0	1/1	0/0	0/0	0/0	0/0	0/0	0/0	1/1	0/0	0/0	0/0	0/0	C|bidirectional_gene_fusion|HIGH|OS01G0126401&OS01G0126600|OS01G0126401&OS01G0126600|gene_variant|OS01G0126401|||n.1449466_1449449delCGTGCAGACATTGTGCAA||||||
chr01	1450094	G	GGGTATACTGTTTAGCAGTACCGT	17929	0/0	0/0	0/0	0/0	1/1	0/0	1/1	1/1	0/0	1/1	0/0	0/0	1/1	0/0	0/0	0/0	0/0	0/0	0/0	1/1	0/0	0/0	0/0	0/0	GGGTATACTGTTTAGCAGTACCGT|3_prime_UTR_variant|MODIFIER|OS01G0126600|OS01G0126600|transcript|OS01T0126600-01|protein_coding|6/6|c.*13_*14insCTGTTTAGCAGTACCGTGGTATA|||||14|WARNING_TRANSCRIPT_NO_START_CODON&INFO_REALIGN_3_PRIME,GGGTATACTGTTTAGCAGTACCGT|upstream_gene_variant|MODIFIER|OS01G0126401|OS01G0126401|transcript|OS01T0126401-01|protein_coding||c.-3776_-3775insACGGTACTGCTAAACAGTATACC|||||645|
chr01	1464334	TG	T,TGG	2096.66	0/0	1/1	0/0	0/0	./.	1/1	./.	./.	0/0	./.	2/2	0/0	./.	0/0	0/0	2/2	0/0	0/0	0/0	./.	0/0	0/0	0/0	0/0	T|intergenic_region|MODIFIER|EPlOSAG00000052246-EPlOSAG00000022435|EPlOSAG00000052246-EPlOSAG00000022435|intergenic_region|EPlOSAG00000052246-EPlOSAG00000022435|||n.1464335delG||||||,TGG|intergenic_region|MODIFIER|EPlOSAG00000052246-EPlOSAG00000022435|EPlOSAG00000052246-EPlOSAG00000022435|intergenic_region|EPlOSAG00000052246-EPlOSAG00000022435|||n.1464335_1464336insG||||||
chr01	1467352	CG	C	692.35	0/0	1/1	./.	./.	./.	1/1	./.	./.	0/0	./.	./.	0/0	./.	0/0	0/0	0/0	0/0	0/0	./.	./.	.	0/0	0/0	0/0	C|intergenic_region|MODIFIER|EPlOSAG00000052246-EPlOSAG00000022435|EPlOSAG00000052246-EPlOSAG00000022435|intergenic_region|EPlOSAG00000052246-EPlOSAG00000022435|||n.1467353delG||||||
chr01	1482993	AATAT	A,AAT	3465.93	./.	2/2	2/2	.	./.	./.	./.	./.	0/0	./.	0/0	0/0	./.	0/0	1/1	0/0	1/1	./.	0/0	./.	./.	0/0	0/0	.	A|intergenic_region|MODIFIER|EPlOSAG00000000101-OS01G0126900|EPlOSAG00000000101-OS01G0126900|intergenic_region|EPlOSAG00000000101-OS01G0126900|||n.1482994_1482997delATAT||||||,AAT|intergenic_region|MODIFIER|EPlOSAG00000000101-OS01G0126900|EPlOSAG00000000101-OS01G0126900|intergenic_region|EPlOSAG00000000101-OS01G0126900|||n.1482996_1482997delAT||||||
chr01	1483558	C	CTTA	11589	0/0	0/0	0/0	0/0	1/1	0/0	1/1	1/1	0/0	1/1	0/0	0/0	1/1	0/0	0/0	0/0	0/0	0/0	0/0	1/1	0/0	0/0	0/0	0/0	CTTA|intergenic_region|MODIFIER|EPlOSAG00000000101-OS01G0126900|EPlOSAG00000000101-OS01G0126900|intergenic_region|EPlOSAG00000000101-OS01G0126900|||n.1483558_1483559insTTA||||||
chr01	1488839	G	GC	5090.56	0/0	0/0	0/0	0/0	1|1	0/0	./.	./.	0/0	./.	0/0	0/0	./.	0/0	0/0	0/0	0/0	0/0	0/0	1|1	0/0	0/0	0/0	0/0	GC|frameshift_variant|HIGH|OS01G0126900|OS01G0126900|transcript|OS01T0126900-01|protein_coding|3/3|c.1739_1740insC|p.Leu581fs|1852/1909|1740/1788|580/595||,GC|downstream_gene_variant|MODIFIER|OS01G0127000|OS01G0127000|transcript|OS01T0127000-01|protein_coding||c.*1958_*1959insG|||||1654|WARNING_TRANSCRIPT_NO_START_CODON
chr01	1488850	T	TATCCAACTTCATCA	4010.56	0/0	0/0	0/0	0/0	1|1	0/0	./.	./.	0/0	./.	0/0	0/0	./.	0/0	0/0	0/0	0/0	0/0	0/0	1|1	0/0	0/0	0/0	0/0	TATCCAACTTCATCA|frameshift_variant|HIGH|OS01G0126900|OS01G0126900|transcript|OS01T0126900-01|protein_coding|3/3|c.1750_1751insATCCAACTTCATCA|p.Trp584fs|1863/1909|1751/1788|584/595||,TATCCAACTTCATCA|downstream_gene_variant|MODIFIER|OS01G0127000|OS01G0127000|transcript|OS01T0127000-01|protein_coding||c.*1947_*1948insTGATGAAGTTGGAT|||||1643|WARNING_TRANSCRIPT_NO_START_CODON
chr01	1488853	G	GAC	3290.56	0/0	0/0	0/0	0/0	1|1	0/0	./.	./.	0/0	./.	0/0	0/0	./.	0/0	0/0	0/0	0/0	0/0	0/0	1|1	0/0	0/0	0/0	0/0	GAC|frameshift_variant|HIGH|OS01G0126900|OS01G0126900|transcript|OS01T0126900-01|protein_coding|3/3|c.1753_1754insAC|p.Val585fs|1866/1909|1754/1788|585/595||,GAC|downstream_gene_variant|MODIFIER|OS01G0127000|OS01G0127000|transcript|OS01T0127000-01|protein_coding||c.*1944_*1945insGT|||||1640|WARNING_TRANSCRIPT_NO_START_CODON
chr01	1488855	T	TG	3245.56	0/0	0/0	0/0	0/0	1|1	0/0	./.	./.	0/0	./.	0/0	0/0	./.	0/0	0/0	0/0	0/0	0/0	0/0	1|1	0/0	0/0	0/0	0/0	TG|frameshift_variant|HIGH|OS01G0126900|OS01G0126900|transcript|OS01T0126900-01|protein_coding|3/3|c.1755_1756insG|p.Asn586fs|1868/1909|1756/1788|586/595||,TG|downstream_gene_variant|MODIFIER|OS01G0127000|OS01G0127000|transcript|OS01T0127000-01|protein_coding||c.*1942_*1943insC|||||1638|WARNING_TRANSCRIPT_NO_START_CODON
chr01	1488876	T	TTA	2026.78	0/0	0/0	0/0	0/0	1|1	0/0	./.	0/0	0/0	./.	0/0	0/0	./.	0/0	0/0	0/0	0/0	0/0	0/0	1|1	0/0	0/0	0/0	0/0	TTA|frameshift_variant|HIGH|OS01G0126900|OS01G0126900|transcript|OS01T0126900-01|protein_coding|3/3|c.1780_1781dupAT|p.Met594fs|1894/1909|1782/1788|594/595||INFO_REALIGN_3_PRIME,TTA|downstream_gene_variant|MODIFIER|OS01G0127000|OS01G0127000|transcript|OS01T0127000-01|protein_coding||c.*1920_*1921dupTA|||||1617|WARNING_TRANSCRIPT_NO_START_CODON
chr01	1488891	TG	T	1577.55	0/0	0/0	0/0	0/0	1|1	0/0	./.	./.	0/0	./.	0/0	0/0	./.	0/0	0/0	0/0	0/0	0/0	0/0	1|1	0/0	0/0	0/0	0/0	T|3_prime_UTR_variant|MODIFIER|OS01G0126900|OS01G0126900|transcript|OS01T0126900-01|protein_coding|3/3|c.*4delG|||||4|,T|downstream_gene_variant|MODIFIER|OS01G0127000|OS01G0127000|transcript|OS01T0127000-01|protein_coding||c.*1906delC|||||1602|WARNING_TRANSCRIPT_NO_START_CODON
chr01	1488893	ATTTG	A	1657.55	0/0	0/0	0/0	0/0	1|1	0/0	./.	./.	0/0	./.	0/0	0/0	./.	0/0	0/0	0/0	0/0	0/0	0/0	1|1	0/0	0/0	0/0	0/0	A|frameshift_variant|HIGH|OS01G0126900|OS01G0126900|transcript|OS01T0126900-01|protein_coding|3/3|c.1781_1784delTTTG|p.Met594fs|1893/1909|1781/1788|594/595||INFO_REALIGN_3_PRIME,A|downstream_gene_variant|MODIFIER|OS01G0127000|OS01G0127000|transcript|OS01T0127000-01|protein_coding||c.*1901_*1904delCAAA|||||1600|WARNING_TRANSCRIPT_NO_START_CODON
chr01	1488966	TA	T	6792.03	0/0	0/0	0/0	0/0	1|1	0/0	1|1	1|1	0/0	1|1	0/0	0/0	1|1	0/0	0/0	0/0	0/0	0/0	0/0	1|1	0/0	0/0	0/0	0/0	T|downstream_gene_variant|MODIFIER|OS01G0126900|OS01G0126900|transcript|OS01T0126900-01|protein_coding||c.*79delA|||||70|,T|downstream_gene_variant|MODIFIER|OS01G0127000|OS01G0127000|transcript|OS01T0127000-01|protein_coding||c.*1831delT|||||1527|WARNING_TRANSCRIPT_NO_START_CODON,T|intergenic_region|MODIFIER|OS01G0126900-OS01G0127000|OS01G0126900-OS01G0127000|intergenic_region|OS01G0126900-OS01G0…
chr01	1489049	AG	A	11201.1	0/0	0/0	0/0	0/0	1|1	0/0	1|1	1|1	0/0	1|1	./.	0/0	1|1	0/0	0/0	0/0	0/0	0/0	./.	1|1	0/0	0/0	./.	0/0	A|upstream_gene_variant|MODIFIER|OS01G0127100|OS01G0127100|transcript|OS01T0127100-01|protein_coding||c.-2026delG|||||1943|,A|downstream_gene_variant|MODIFIER|OS01G0126900|OS01G0126900|transcript|OS01T0126900-01|protein_coding||c.*162delG|||||153|,A|downstream_gene_variant|MODIFIER|OS01G0127000|OS01G0127000|transcript|OS01T0127000-01|protein_coding||c.*1748delC|||||1444|WARNING_TRANSCRIPT_NO_STAR…
chr01	1489051	AGATATATATATATATATATATATATATATAT	A	13287.2	0/0	0/0	0/0	0/0	1|1	0/0	1|1	1|1	0/0	1|1	./.	./.	1|1	0/0	0/0	./.	0/0	0/0	./.	1|1	0/0	0/0	./.	0/0	A|upstream_gene_variant|MODIFIER|OS01G0127100|OS01G0127100|transcript|OS01T0127100-01|protein_coding||c.-2024_-1994delGATATATATATATATATATATATATATATAT|||||1941|,A|downstream_gene_variant|MODIFIER|OS01G0126900|OS01G0126900|transcript|OS01T0126900-01|protein_coding||c.*164_*194delGATATATATATATATATATATATATATATAT|||||155|,A|downstream_gene_variant|MODIFIER|OS01G0127000|OS01G0127000|transcript|OS01T012…
chr01	1489212	A	AT	5377.19	0/0	0/0	0/0	0/0	1|1	0/0	1|1	1|1	0/0	1|1	0/0	0/0	1|1	0/0	0/0	0/0	0/0	0/0	0/0	0/0	0/0	0/0	0/0	0/0	AT|upstream_gene_variant|MODIFIER|OS01G0127100|OS01G0127100|transcript|OS01T0127100-01|protein_coding||c.-1864_-1863insT|||||1780|,AT|downstream_gene_variant|MODIFIER|OS01G0126900|OS01G0126900|transcript|OS01T0126900-01|protein_coding||c.*324_*325insT|||||316|,AT|downstream_gene_variant|MODIFIER|OS01G0127000|OS01G0127000|transcript|OS01T0127000-01|protein_coding||c.*1585_*1586insA|||||1281|WARNIN…
chr01	1489214	A	AAT	5648.7	0/0	0/0	0/0	0/0	1|1	0/0	1|1	1|1	0/0	1|1	0/0	0/0	1|1	0/0	0/0	0/0	0/0	0/0	0/0	0/0	0/0	0/0	0/0	0/0	AAT|upstream_gene_variant|MODIFIER|OS01G0127100|OS01G0127100|transcript|OS01T0127100-01|protein_coding||c.-1862_-1861insAT|||||1778|,AAT|downstream_gene_variant|MODIFIER|OS01G0126900|OS01G0126900|transcript|OS01T0126900-01|protein_coding||c.*326_*327insAT|||||318|,AAT|downstream_gene_variant|MODIFIER|OS01G0127000|OS01G0127000|transcript|OS01T0127000-01|protein_coding||c.*1583_*1584insAT|||||1279|…
chr01	1489224	T	TGTAAAAG	5667.52	0/0	0/0	0/0	0/0	1|1	0/0	1|1	1|1	0/0	1|1	0/0	0/0	1|1	0/0	0/0	0/0	0/0	0/0	0/0	./.	0/0	0/0	0/0	0/0	TGTAAAAG|upstream_gene_variant|MODIFIER|OS01G0127100|OS01G0127100|transcript|OS01T0127100-01|protein_coding||c.-1852_-1851insGTAAAAG|||||1768|,TGTAAAAG|downstream_gene_variant|MODIFIER|OS01G0126900|OS01G0126900|transcript|OS01T0126900-01|protein_coding||c.*336_*337insGTAAAAG|||||328|,TGTAAAAG|downstream_gene_variant|MODIFIER|OS01G0127000|OS01G0127000|transcript|OS01T0127000-01|protein_coding||c.*…
chr01	1489743	C	CATTCTATATTTATCT	3427.97	0/0	0/0	0/0	0/0	1/1	0/0	1/1	1/1	0/0	1/1	0/0	0/0	1/1	0/0	0/0	0/0	0/0	0/0	0/0	1/1	0/0	0/0	0/0	0/0	CATTCTATATTTATCT|upstream_gene_variant|MODIFIER|OS01G0127100|OS01G0127100|transcript|OS01T0127100-01|protein_coding||c.-1333_-1332insATTCTATATTTATCT|||||1249|,CATTCTATATTTATCT|downstream_gene_variant|MODIFIER|OS01G0126900|OS01G0126900|transcript|OS01T0126900-01|protein_coding||c.*855_*856insATTCTATATTTATCT|||||847|,CATTCTATATTTATCT|downstream_gene_variant|MODIFIER|OS01G0127000|OS01G0127000|transc…
chr01	1490015	G	GCTCGTCTC	2046.47	0/0	0/0	0/0	0/0	1|1	0/0	1|1	1|1	0/0	1|1	0/0	0/0	1|1	0/0	0/0	0/0	0/0	0/0	0/0	1|1	0/0	0/0	0/0	0/0	GCTCGTCTC|upstream_gene_variant|MODIFIER|OS01G0127100|OS01G0127100|transcript|OS01T0127100-01|protein_coding||c.-1061_-1060insCTCGTCTC|||||977|,GCTCGTCTC|downstream_gene_variant|MODIFIER|OS01G0126900|OS01G0126900|transcript|OS01T0126900-01|protein_coding||c.*1127_*1128insCTCGTCTC|||||1119|,GCTCGTCTC|downstream_gene_variant|MODIFIER|OS01G0127000|OS01G0127000|transcript|OS01T0127000-01|protein_codi…
chr01	1490059	G	GTTTATT	5137.87	0/0	0/0	0/0	0/0	1|1	0/0	1|1	1|1	0/0	1|1	0/0	0/0	1|1	0/0	0/0	0/0	0/0	0/0	0/0	1|1	0/0	0/0	0/0	0/0	GTTTATT|upstream_gene_variant|MODIFIER|OS01G0127100|OS01G0127100|transcript|OS01T0127100-01|protein_coding||c.-1017_-1016insTTTATT|||||933|,GTTTATT|downstream_gene_variant|MODIFIER|OS01G0126900|OS01G0126900|transcript|OS01T0126900-01|protein_coding||c.*1171_*1172insTTTATT|||||1163|,GTTTATT|downstream_gene_variant|MODIFIER|OS01G0127000|OS01G0127000|transcript|OS01T0127000-01|protein_coding||c.*738…
chr01	1490189	GCCTGTGGA	G	4803.91	0/0	0/0	0/0	0/0	1/1	0/0	1/1	1/1	0/0	1/1	0/0	0/0	1/1	0/0	0/0	0/0	0/0	0/0	0/0	1/1	0/0	0/0	0/0	0/0	G|upstream_gene_variant|MODIFIER|OS01G0127100|OS01G0127100|transcript|OS01T0127100-01|protein_coding||c.-886_-879delCCTGTGGA|||||803|,G|downstream_gene_variant|MODIFIER|OS01G0126900|OS01G0126900|transcript|OS01T0126900-01|protein_coding||c.*1302_*1309delCCTGTGGA|||||1293|,G|downstream_gene_variant|MODIFIER|OS01G0127000|OS01G0127000|transcript|OS01T0127000-01|protein_coding||c.*601_*608delTCCACAGG…
chr01	1490428	A	ATCC	113.9	0/0	0/0	0/0	0/0	./.	0/0	.	1|1	0/0	./.	0/0	0/0	./.	0/0	0/0	0/0	0/0	0/0	0/0	./.	0/0	0/0	0/0	0/0	ATCC|upstream_gene_variant|MODIFIER|OS01G0127100|OS01G0127100|transcript|OS01T0127100-01|protein_coding||c.-648_-647insTCC|||||564|,ATCC|downstream_gene_variant|MODIFIER|OS01G0126900|OS01G0126900|transcript|OS01T0126900-01|protein_coding||c.*1540_*1541insTCC|||||1532|,ATCC|downstream_gene_variant|MODIFIER|OS01G0127000|OS01G0127000|transcript|OS01T0127000-01|protein_coding||c.*369_*370insGGA|||||6…
chr01	1490478	C	CA	3344.97	0/0	0/0	0/0	0/0	1|1	0/0	1|1	1|1	0/0	1|1	0/0	0/0	1|1	0/0	0/0	0/0	0/0	0/0	0/0	1|1	0/0	0/0	0/0	0/0	CA|upstream_gene_variant|MODIFIER|OS01G0127100|OS01G0127100|transcript|OS01T0127100-01|protein_coding||c.-598_-597insA|||||514|,CA|downstream_gene_variant|MODIFIER|OS01G0126900|OS01G0126900|transcript|OS01T0126900-01|protein_coding||c.*1590_*1591insA|||||1582|,CA|downstream_gene_variant|MODIFIER|OS01G0127000|OS01G0127000|transcript|OS01T0127000-01|protein_coding||c.*319_*320insT|||||15|WARNING_TR…
chr01	1490481	T	TA	3379.97	0/0	0/0	0/0	0/0	1|1	0/0	1|1	1|1	0/0	1|1	0/0	0/0	1|1	0/0	0/0	0/0	0/0	0/0	0/0	1|1	0/0	0/0	0/0	0/0	TA|upstream_gene_variant|MODIFIER|OS01G0127100|OS01G0127100|transcript|OS01T0127100-01|protein_coding||c.-595_-594insA|||||511|,TA|downstream_gene_variant|MODIFIER|OS01G0126900|OS01G0126900|transcript|OS01T0126900-01|protein_coding||c.*1593_*1594insA|||||1585|,TA|downstream_gene_variant|MODIFIER|OS01G0127000|OS01G0127000|transcript|OS01T0127000-01|protein_coding||c.*316_*317insT|||||12|WARNING_TR…
chr01	1490914	TAC	T	15179	0/0	0/0	0/0	0/0	1|1	0/0	1|1	1|1	0/0	1|1	0/0	0/0	1|1	0/0	0/0	0/0	0/0	0/0	0/0	1|1	0/0	0/0	0/0	0/0	T|upstream_gene_variant|MODIFIER|OS01G0127100|OS01G0127100|transcript|OS01T0127100-01|protein_coding||c.-161_-160delAC|||||78|,T|intron_variant|MODIFIER|OS01G0127000|OS01G0127000|transcript|OS01T0127000-01|protein_coding|1/1|c.1312-65_1312-64delGT||||||WARNING_TRANSCRIPT_NO_START_CODON
chr01	1490920	C	CCG	15544	0/0	0/0	0/0	0/0	1|1	0/0	1|1	1|1	0/0	1|1	0/0	0/0	1|1	0/0	0/0	0/0	0/0	0/0	0/0	1|1	0/0	0/0	0/0	0/0	CCG|upstream_gene_variant|MODIFIER|OS01G0127100|OS01G0127100|transcript|OS01T0127100-01|protein_coding||c.-156_-155insCG|||||72|,CCG|intron_variant|MODIFIER|OS01G0127000|OS01G0127000|transcript|OS01T0127000-01|protein_coding|1/1|c.1312-70_1312-69insCG||||||WARNING_TRANSCRIPT_NO_START_CODON
chr01	1490991	GCAT	G	13700	0/0	0/0	0/0	0/0	1|1	0/0	1|1	1|1	0/0	1|1	0/0	0/0	1|1	0/0	0/0	0/0	0/0	0/0	0/0	1|1	0/0	0/0	0/0	0/0	G|5_prime_UTR_variant|MODIFIER|OS01G0127100|OS01G0127100|transcript|OS01T0127100-01|protein_coding|1/1|c.-84_-82delCAT|||||82|,G|upstream_gene_variant|MODIFIER|OS01G0127100|OS01G0127100|transcript|OS01T0127100-01|protein_coding|1/1|c.-84_-82delCAT|||||1|,G|intron_variant|MODIFIER|OS01G0127000|OS01G0127000|transcript|OS01T0127000-01|protein_coding|1/1|c.1311+30_1311+32delATG||||||WARNING_TRANSCRIP…
chr01	1491000	A	ACATGG	14195	0/0	0/0	0/0	0/0	1|1	0/0	1|1	1|1	0/0	1|1	0/0	0/0	1|1	0/0	0/0	0/0	0/0	0/0	0/0	1|1	0/0	0/0	0/0	0/0	ACATGG|5_prime_UTR_variant|MODIFIER|OS01G0127100|OS01G0127100|transcript|OS01T0127100-01|protein_coding|1/1|c.-76_-75insCATGG|||||75|,ACATGG|intron_variant|MODIFIER|OS01G0127000|OS01G0127000|transcript|OS01T0127000-01|protein_coding|1/1|c.1311+23_1311+24insCCATG||||||WARNING_TRANSCRIPT_NO_START_CODON
chr01	1491633	T	TGA	11750	0/0	0/0	0/0	0/0	1|1	0/0	1|1	1|1	0/0	1|1	0/0	0/0	1|1	0/0	0/0	0/0	0/0	0/0	0/0	1|1	0/0	0/0	0/0	0/0	TGA|frameshift_variant|HIGH|OS01G0127000|OS01G0127000|transcript|OS01T0127000-01|protein_coding|1/2|c.701_702insTC|p.Leu235fs|701/1669|701/1365|234/454||WARNING_TRANSCRIPT_NO_START_CODON,TGA|3_prime_UTR_variant|MODIFIER|OS01G0127100|OS01G0127100|transcript|OS01T0127100-01|protein_coding|1/1|c.*217_*218insAG|||||218|INFO_REALIGN_3_PRIME
chr01	1491635	TCG	T	11980	0/0	0/0	0/0	0/0	1|1	0/0	1|1	1|1	0/0	1|1	0/0	0/0	1|1	0/0	0/0	0/0	0/0	0/0	0/0	1|1	0/0	0/0	0/0	0/0	T|frameshift_variant|HIGH|OS01G0127000|OS01G0127000|transcript|OS01T0127000-01|protein_coding|1/2|c.698_699delCG|p.Ala233fs|699/1669|698/1365|233/454||WARNING_TRANSCRIPT_NO_START_CODON,T|3_prime_UTR_variant|MODIFIER|OS01G0127100|OS01G0127100|transcript|OS01T0127100-01|protein_coding|1/1|c.*221_*222delCG|||||221|INFO_REALIGN_3_PRIME
chr01	1492361	CGGTGGG	C	11231	0/0	0/0	0/0	0/0	1|1	0/0	1|1	1|1	0/0	1|1	0/0	0/0	1|1	0/0	0/0	0/0	0/0	0/0	0/0	1|1	0/0	0/0	0/0	0/0	C|3_prime_UTR_variant|MODIFIER|OS01G0127100|OS01G0127100|transcript|OS01T0127100-01|protein_coding|1/1|c.*946_*951delGTGGGG|||||946|INFO_REALIGN_3_PRIME,C|upstream_gene_variant|MODIFIER|OS01G0127000|OS01G0127000|transcript|OS01T0127000-01|protein_coding||c.-33_-28delCCCACC|||||28|WARNING_TRANSCRIPT_NO_START_CODON
chr01	1492371	G	GTC	10933	0/0	0/0	0/0	0/0	1|1	0/0	1|1	1|1	0/0	1|1	0/0	0/0	1|1	0/0	0/0	0/0	0/0	0/0	0/0	1|1	0/0	0/0	0/0	0/0	GTC|3_prime_UTR_variant|MODIFIER|OS01G0127100|OS01G0127100|transcript|OS01T0127100-01|protein_coding|1/1|c.*954_*955insTC|||||955|,GTC|upstream_gene_variant|MODIFIER|OS01G0127000|OS01G0127000|transcript|OS01T0127000-01|protein_coding||c.-38_-37insGA|||||38|WARNING_TRANSCRIPT_NO_START_CODON
chr01	1492372	G	GATTT	10798	0/0	0/0	0/0	0/0	1|1	0/0	1|1	1|1	0/0	1|1	0/0	0/0	1|1	0/0	0/0	0/0	0/0	0/0	0/0	1|1	0/0	0/0	0/0	0/0	GATTT|3_prime_UTR_variant|MODIFIER|OS01G0127100|OS01G0127100|transcript|OS01T0127100-01|protein_coding|1/1|c.*955_*956insATTT|||||956|,GATTT|upstream_gene_variant|MODIFIER|OS01G0127000|OS01G0127000|transcript|OS01T0127000-01|protein_coding||c.-39_-38insAAAT|||||39|WARNING_TRANSCRIPT_NO_START_CODON
chr01	1492566	G	GT	5904.01	0/0	0/0	0/0	0/0	1|1	0/0	1|1	1|1	0/0	1|1	0/0	0/0	1|1	0/0	0/0	0/0	0/0	0/0	0/0	1|1	0/0	0/0	0/0	0/0	GT|3_prime_UTR_variant|MODIFIER|OS01G0127100|OS01G0127100|transcript|OS01T0127100-01|protein_coding|1/1|c.*1152dupT|||||1153|INFO_REALIGN_3_PRIME,GT|upstream_gene_variant|MODIFIER|OS01G0127000|OS01G0127000|transcript|OS01T0127000-01|protein_coding||c.-233dupA|||||233|WARNING_TRANSCRIPT_NO_START_CODON
chr01	1492570	A	ACT	6184.98	0/0	0/0	0/0	0/0	1|1	0/0	1|1	1|1	0/0	1|1	0/0	0/0	1|1	0/0	0/0	0/0	0/0	0/0	0/0	1|1	0/0	0/0	0/0	0/0	ACT|3_prime_UTR_variant|MODIFIER|OS01G0127100|OS01G0127100|transcript|OS01T0127100-01|protein_coding|1/1|c.*1153_*1154insCT|||||1154|,ACT|upstream_gene_variant|MODIFIER|OS01G0127000|OS01G0127000|transcript|OS01T0127000-01|protein_coding||c.-237_-236insAG|||||237|WARNING_TRANSCRIPT_NO_START_CODON
chr01	1492687	A	AC	6676.01	0/0	0/0	0/0	0/0	1|1	0/0	1|1	1|1	0/0	1|1	0/0	0/0	1|1	0/0	0/0	0/0	0/0	0/0	0/0	1|1	0/0	0/0	0/0	0/0	AC|upstream_gene_variant|MODIFIER|OS01G0127000|OS01G0127000|transcript|OS01T0127000-01|protein_coding||c.-354_-353insG|||||354|WARNING_TRANSCRIPT_NO_START_CODON,AC|downstream_gene_variant|MODIFIER|OS01G0127100|OS01G0127100|transcript|OS01T0127100-01|protein_coding||c.*1270_*1271insC|||||8|,AC|intergenic_region|MODIFIER|OS01G0127100-OS01G0127200|OS01G0127100-OS01G0127200|intergenic_region|OS01G012…
chr01	1492945	AC	A	12515	0/0	0/0	0/0	0/0	1|1	0/0	1|1	1|1	0/0	1|1	0/0	0/0	1|1	0/0	0/0	0/0	0/0	0/0	0/0	1|1	0/0	0/0	0/0	0/0	A|upstream_gene_variant|MODIFIER|OS01G0127000|OS01G0127000|transcript|OS01T0127000-01|protein_coding||c.-612delG|||||612|WARNING_TRANSCRIPT_NO_START_CODON,A|downstream_gene_variant|MODIFIER|OS01G0127100|OS01G0127100|transcript|OS01T0127100-01|protein_coding||c.*1529delC|||||266|,A|intergenic_region|MODIFIER|OS01G0127100-OS01G0127200|OS01G0127100-OS01G0127200|intergenic_region|OS01G0127100-OS01G01…
chr01	1492948	C	CT	12720	0/0	0/0	0/0	0/0	1|1	0/0	1|1	1|1	0/0	1|1	0/0	0/0	1|1	0/0	0/0	0/0	0/0	0/0	0/0	1|1	0/0	0/0	0/0	0/0	CT|upstream_gene_variant|MODIFIER|OS01G0127000|OS01G0127000|transcript|OS01T0127000-01|protein_coding||c.-615_-614insA|||||615|WARNING_TRANSCRIPT_NO_START_CODON,CT|downstream_gene_variant|MODIFIER|OS01G0127100|OS01G0127100|transcript|OS01T0127100-01|protein_coding||c.*1531_*1532insT|||||269|,CT|intergenic_region|MODIFIER|OS01G0127100-OS01G0127200|OS01G0127100-OS01G0127200|intergenic_region|OS01G0…
chr01	1493060	TG	T	14828	0/0	0/0	0/0	0/0	1|1	0/0	1|1	1|1	0/0	1|1	0/0	0/0	1|1	0/0	0/0	0/0	0/0	0/0	0/0	1|1	0/0	0/0	0/0	0/0	T|upstream_gene_variant|MODIFIER|OS01G0127000|OS01G0127000|transcript|OS01T0127000-01|protein_coding||c.-727delC|||||727|WARNING_TRANSCRIPT_NO_START_CODON,T|downstream_gene_variant|MODIFIER|OS01G0127100|OS01G0127100|transcript|OS01T0127100-01|protein_coding||c.*1644delG|||||381|,T|intergenic_region|MODIFIER|OS01G0127100-OS01G0127200|OS01G0127100-OS01G0127200|intergenic_region|OS01G0127100-OS01G01…
chr01	1493062	CTG	C	14372	0/0	0/0	0/0	0/0	1|1	0/0	1|1	1|1	0/0	1|1	0/0	0/0	1|1	0/0	0/0	0/0	0/0	0/0	0/0	1|1	0/0	0/0	0/0	0/0	C|upstream_gene_variant|MODIFIER|OS01G0127000|OS01G0127000|transcript|OS01T0127000-01|protein_coding||c.-730_-729delCA|||||729|WARNING_TRANSCRIPT_NO_START_CODON,C|downstream_gene_variant|MODIFIER|OS01G0127100|OS01G0127100|transcript|OS01T0127100-01|protein_coding||c.*1646_*1647delTG|||||383|,C|intergenic_region|MODIFIER|OS01G0127100-OS01G0127200|OS01G0127100-OS01G0127200|intergenic_region|OS01G01…
chr01	1493251	GTAAT	G	3990.81	0/0	0/0	0/0	0/0	1/1	0/0	1/1	1/1	0/0	1/1	0/0	0/0	1/1	0/0	0/0	0/0	0/0	0/0	0/0	1/1	0/0	0/0	0/0	0/0	G|upstream_gene_variant|MODIFIER|OS01G0127000|OS01G0127000|transcript|OS01T0127000-01|protein_coding||c.-921_-918delATTA|||||918|WARNING_TRANSCRIPT_NO_START_CODON,G|downstream_gene_variant|MODIFIER|OS01G0127100|OS01G0127100|transcript|OS01T0127100-01|protein_coding||c.*1835_*1838delTAAT|||||572|,G|intergenic_region|MODIFIER|OS01G0127100-OS01G0127200|OS01G0127100-OS01G0127200|intergenic_region|OS0…
chr01	1493640	ACTAG	A	12885	0/0	0/0	0/0	0/0	1/1	0/0	1/1	1/1	0/0	1/1	0/0	0/0	1/1	0/0	0/0	0/0	0/0	0/0	0/0	1/1	0/0	0/0	0/0	0/0	A|upstream_gene_variant|MODIFIER|OS01G0127000|OS01G0127000|transcript|OS01T0127000-01|protein_coding||c.-1310_-1307delCTAG|||||1307|WARNING_TRANSCRIPT_NO_START_CODON,A|downstream_gene_variant|MODIFIER|OS01G0127100|OS01G0127100|transcript|OS01T0127100-01|protein_coding||c.*2224_*2227delCTAG|||||961|,A|intergenic_region|MODIFIER|OS01G0127100-OS01G0127200|OS01G0127100-OS01G0127200|intergenic_region|…
chr01	1493777	C	CTAAT	11842	0/0	0/0	0/0	0/0	1/1	0/0	1/1	1/1	0/0	1/1	0/0	0/0	1/1	0/0	0/0	0/0	0/0	0/0	0/0	1/1	0/0	0/0	0/0	0/0	CTAAT|upstream_gene_variant|MODIFIER|OS01G0127000|OS01G0127000|transcript|OS01T0127000-01|protein_coding||c.-1444_-1443insATTA|||||1444|WARNING_TRANSCRIPT_NO_START_CODON,CTAAT|downstream_gene_variant|MODIFIER|OS01G0127100|OS01G0127100|transcript|OS01T0127100-01|protein_coding||c.*2360_*2361insTAAT|||||1098|,CTAAT|intergenic_region|MODIFIER|OS01G0127100-OS01G0127200|OS01G0127100-OS01G0127200|inter…
chr01	1493888	T	TA	4734.98	0/0	0/0	0/0	0/0	1/1	0/0	1/1	1/1	0/0	1/1	0/0	0/0	1/1	0/0	0/0	0/0	0/0	0/0	0/0	1/1	0/0	0/0	0/0	0/0	TA|upstream_gene_variant|MODIFIER|OS01G0127000|OS01G0127000|transcript|OS01T0127000-01|protein_coding||c.-1555_-1554insT|||||1555|WARNING_TRANSCRIPT_NO_START_CODON,TA|downstream_gene_variant|MODIFIER|OS01G0127100|OS01G0127100|transcript|OS01T0127100-01|protein_coding||c.*2471_*2472insA|||||1209|,TA|intergenic_region|MODIFIER|OS01G0127100-OS01G0127200|OS01G0127100-OS01G0127200|intergenic_region|OS…
chr01	1493941	T	TA	4639.96	0/0	0/0	0/0	0/0	1|1	0/0	1|1	1|1	0/0	1|1	0/0	0/0	1|1	0/0	0/0	0/0	0/0	0/0	0/0	1|1	0/0	0/0	0/0	0/0	TA|upstream_gene_variant|MODIFIER|OS01G0127000|OS01G0127000|transcript|OS01T0127000-01|protein_coding||c.-1608_-1607insT|||||1608|WARNING_TRANSCRIPT_NO_START_CODON,TA|downstream_gene_variant|MODIFIER|OS01G0127100|OS01G0127100|transcript|OS01T0127100-01|protein_coding||c.*2524_*2525insA|||||1262|,TA|intergenic_region|MODIFIER|OS01G0127100-OS01G0127200|OS01G0127100-OS01G0127200|intergenic_region|OS…
chr01	1493991	G	GA	4491.01	0/0	0/0	0/0	0/0	1/1	0/0	1/1	1/1	0/0	1/1	0/0	0/0	1/1	0/0	0/0	0/0	0/0	0/0	0/0	1/1	0/0	0/0	0/0	0/0	GA|upstream_gene_variant|MODIFIER|OS01G0127000|OS01G0127000|transcript|OS01T0127000-01|protein_coding||c.-1658_-1657insT|||||1658|WARNING_TRANSCRIPT_NO_START_CODON,GA|downstream_gene_variant|MODIFIER|OS01G0127100|OS01G0127100|transcript|OS01T0127100-01|protein_coding||c.*2574_*2575insA|||||1312|,GA|intergenic_region|MODIFIER|OS01G0127100-OS01G0127200|OS01G0127100-OS01G0127200|intergenic_region|OS…
chr01	1494132	CT	C	959.03	0/0	0/0	0/0	0/0	1/1	0/0	./.	1/1	0/0	1/1	0/0	0/0	1/1	0/0	0/0	0/0	0/0	0/0	0/0	1/1	0/0	0/0	0/0	0/0	C|upstream_gene_variant|MODIFIER|OS01G0127000|OS01G0127000|transcript|OS01T0127000-01|protein_coding||c.-1799delA|||||1799|WARNING_TRANSCRIPT_NO_START_CODON,C|downstream_gene_variant|MODIFIER|OS01G0127100|OS01G0127100|transcript|OS01T0127100-01|protein_coding||c.*2716delT|||||1453|,C|intergenic_region|MODIFIER|OS01G0127100-OS01G0127200|OS01G0127100-OS01G0127200|intergenic_region|OS01G0127100-OS01…
chr01	1494151	AAATT	A	1486.09	0/0	0/0	0/0	0/0	1/1	0/0	./.	1/1	0/0	1/1	0/0	0/0	1/1	0/0	0/0	0/0	0/0	0/0	0/0	1/1	0/0	0/0	0/0	0/0	A|upstream_gene_variant|MODIFIER|OS01G0127000|OS01G0127000|transcript|OS01T0127000-01|protein_coding||c.-1821_-1818delAATT|||||1818|WARNING_TRANSCRIPT_NO_START_CODON,A|downstream_gene_variant|MODIFIER|OS01G0127100|OS01G0127100|transcript|OS01T0127100-01|protein_coding||c.*2735_*2738delAATT|||||1472|,A|intergenic_region|MODIFIER|OS01G0127100-OS01G0127200|OS01G0127100-OS01G0127200|intergenic_region…
chr01	1494268	T	TTTAATTGCAAAGCGAAAAAGGTAAAAAAAAATTTTGAAAGGGCCGAAAAAGG	13445	0/0	0/0	0/0	0/0	1/1	0/0	1/1	1/1	0/0	1/1	0/0	0/0	1/1	0/0	0/0	0/0	0/0	0/0	0/0	1/1	0/0	0/0	0/0	0/0	TTTAATTGCAAAGCGAAAAAGGTAAAAAAAAATTTTGAAAGGGCCGAAAAAGG|upstream_gene_variant|MODIFIER|OS01G0127000|OS01G0127000|transcript|OS01T0127000-01|protein_coding||c.-1935_-1934insCCTTTTTCGGCCCTTTCAAAATTTTTTTTTACCTTTTTCGCTTTGCAATTAA|||||1935|WARNING_TRANSCRIPT_NO_START_CODON,TTTAATTGCAAAGCGAAAAAGGTAAAAAAAAATTTTGAAAGGGCCGAAAAAGG|downstream_gene_variant|MODIFIER|OS01G0127100|OS01G0127100|transcript|OS01T0127…
chr01	1494349	CA	C	9683.98	0/0	0/0	0/0	0/0	1|1	0/0	1|1	1|1	0/0	1|1	0/0	0/0	1|1	0/0	0/0	0/0	0/0	0/0	0/0	1|1	0/0	0/0	0/0	0/0	C|downstream_gene_variant|MODIFIER|OS01G0127100|OS01G0127100|transcript|OS01T0127100-01|protein_coding||c.*2933delA|||||1670|,C|intergenic_region|MODIFIER|OS01G0127100-OS01G0127200|OS01G0127100-OS01G0127200|intergenic_region|OS01G0127100-OS01G0127200|||n.1494350delA||||||
chr01	1494425	T	TTGTTCC	6824.06	0/0	0/0	0/0	0/0	1/1	0/0	1/1	1/1	0/0	1/1	0/0	0/0	1/1	0/0	0/0	0/0	0/0	0/0	0/0	1/1	0/0	0/0	0/0	0/0	TTGTTCC|downstream_gene_variant|MODIFIER|OS01G0127100|OS01G0127100|transcript|OS01T0127100-01|protein_coding||c.*3008_*3009insTGTTCC|||||1746|,TTGTTCC|intergenic_region|MODIFIER|OS01G0127100-OS01G0127200|OS01G0127100-OS01G0127200|intergenic_region|OS01G0127100-OS01G0127200|||n.1494425_1494426insTGTTCC||||||
chr01	1494479	C	CT	6396.01	0/0	0/0	0/0	0/0	1/1	0/0	1/1	1/1	0/0	1/1	0/0	0/0	1/1	0/0	0/0	0/0	0/0	0/0	0/0	1/1	0/0	0/0	0/0	0/0	CT|downstream_gene_variant|MODIFIER|OS01G0127100|OS01G0127100|transcript|OS01T0127100-01|protein_coding||c.*3062_*3063insT|||||1800|,CT|intergenic_region|MODIFIER|OS01G0127100-OS01G0127200|OS01G0127100-OS01G0127200|intergenic_region|OS01G0127100-OS01G0127200|||n.1494479_1494480insT||||||
chr01	1494874	ATTGT	A	10786	0/0	0/0	0/0	0/0	1|1	0/0	1|1	1|1	0/0	1|1	0/0	0/0	1|1	0/0	0/0	0/0	0/0	0/0	0/0	1|1	0/0	0/0	0/0	0/0	A|intergenic_region|MODIFIER|OS01G0127100-OS01G0127200|OS01G0127100-OS01G0127200|intergenic_region|OS01G0127100-OS01G0127200|||n.1494875_1494878delTTGT||||||
chr01	1495302	C	CA	12755	0/0	0/0	0/0	0/0	1|1	0/0	1|1	1|1	0/0	1|1	0/0	0/0	1|1	0/0	0/0	0/0	0/0	0/0	0/0	1|1	0/0	0/0	0/0	0/0	CA|downstream_gene_variant|MODIFIER|OS01G0127200|OS01G0127200|transcript|OS01T0127200-01|protein_coding||c.*2240_*2241insT|||||1938|,CA|intergenic_region|MODIFIER|OS01G0127100-OS01G0127200|OS01G0127100-OS01G0127200|intergenic_region|OS01G0127100-OS01G0127200|||n.1495302_1495303insA||||||
chr01	1495421	GT	G	12680	0/0	0/0	0/0	0/0	1|1	0/0	1|1	1|1	0/0	1|1	0/0	0/0	1|1	0/0	0/0	0/0	0/0	0/0	0/0	1|1	0/0	0/0	0/0	0/0	G|downstream_gene_variant|MODIFIER|OS01G0127200|OS01G0127200|transcript|OS01T0127200-01|protein_coding||c.*2121delA|||||1819|,G|intergenic_region|MODIFIER|OS01G0127100-OS01G0127200|OS01G0127100-OS01G0127200|intergenic_region|OS01G0127100-OS01G0127200|||n.1495422delT||||||
chr01	1495548	A	ACCATCAACTTGGGCTTCGATGTG	723.68	0/0	0/0	0/0	0/0	1|1	0/0	./.	./.	0/0	./.	0/0	0/0	./.	0/0	0/0	0/0	0/0	0/0	0/0	./.	0/0	0/0	0/0	0/0	ACCATCAACTTGGGCTTCGATGTG|downstream_gene_variant|MODIFIER|OS01G0127200|OS01G0127200|transcript|OS01T0127200-01|protein_coding||c.*1994_*1995insCACATCGAAGCCCAAGTTGATGG|||||1692|,ACCATCAACTTGGGCTTCGATGTG|intergenic_region|MODIFIER|OS01G0127100-OS01G0127200|OS01G0127100-OS01G0127200|intergenic_region|OS01G0127100-OS01G0127200|||n.1495548_1495549insCCATCAACTTGGGCTTCGATGTG||||||
chr01	1495549	C	CCATCAACTTGGGCTTCGATG	553.68	0/0	0/0	0/0	0/0	./.	0/0	./.	./.	0/0	1|1	0/0	0/0	./.	0/0	0/0	0/0	0/0	0/0	0/0	./.	0/0	0/0	0/0	0/0	CCATCAACTTGGGCTTCGATG|downstream_gene_variant|MODIFIER|OS01G0127200|OS01G0127200|transcript|OS01T0127200-01|protein_coding||c.*1993_*1994insCATCGAAGCCCAAGTTGATG|||||1691|,CCATCAACTTGGGCTTCGATG|intergenic_region|MODIFIER|OS01G0127100-OS01G0127200|OS01G0127100-OS01G0127200|intergenic_region|OS01G0127100-OS01G0127200|||n.1495549_1495550insCATCAACTTGGGCTTCGATG||||||
chr01	1495551	A	ATCAACTTGGGCTTCGATGT	729.68	0/0	0/0	0/0	0/0	./.	0/0	./.	1|1	0/0	./.	0/0	0/0	./.	0/0	0/0	0/0	0/0	0/0	0/0	./.	0/0	0/0	0/0	0/0	ATCAACTTGGGCTTCGATGT|downstream_gene_variant|MODIFIER|OS01G0127200|OS01G0127200|transcript|OS01T0127200-01|protein_coding||c.*1991_*1992insACATCGAAGCCCAAGTTGA|||||1689|,ATCAACTTGGGCTTCGATGT|intergenic_region|MODIFIER|OS01G0127100-OS01G0127200|OS01G0127100-OS01G0127200|intergenic_region|OS01G0127100-OS01G0127200|||n.1495551_1495552insTCAACTTGGGCTTCGATGT||||||
chr01	1496471	TGCCA	T	5052.94	0/0	0/0	0/0	0/0	1|1	0/0	1|1	1|1	0/0	1|1	0/0	0/0	1|1	0/0	0/0	0/0	0/0	0/0	0/0	1/1	0/0	0/0	0/0	0/0	T|downstream_gene_variant|MODIFIER|OS01G0127200|OS01G0127200|transcript|OS01T0127200-01|protein_coding||c.*1068_*1071delTGGC|||||769|,T|intergenic_region|MODIFIER|OS01G0127100-OS01G0127200|OS01G0127100-OS01G0127200|intergenic_region|OS01G0127100-OS01G0127200|||n.1496472_1496475delGCCA||||||
chr01	1496476	G	GTTGT	5279.98	0/0	0/0	0/0	0/0	1|1	0/0	1|1	1|1	0/0	1|1	0/0	0/0	1|1	0/0	0/0	0/0	0/0	0/0	0/0	1/1	0/0	0/0	0/0	0/0	GTTGT|downstream_gene_variant|MODIFIER|OS01G0127200|OS01G0127200|transcript|OS01T0127200-01|protein_coding||c.*1066_*1067insACAA|||||764|,GTTGT|intergenic_region|MODIFIER|OS01G0127100-OS01G0127200|OS01G0127100-OS01G0127200|intergenic_region|OS01G0127100-OS01G0127200|||n.1496476_1496477insTTGT||||||
chr01	1496713	G	GT	5888.01	0/0	0/0	0/0	0/0	1|1	0/0	1|1	1|1	0/0	1|1	0/0	0/0	1|1	0/0	0/0	0/0	0/0	0/0	0/0	1|1	0/0	0/0	0/0	0/0	GT|downstream_gene_variant|MODIFIER|OS01G0127200|OS01G0127200|transcript|OS01T0127200-01|protein_coding||c.*829_*830insA|||||527|,GT|intergenic_region|MODIFIER|OS01G0127100-OS01G0127200|OS01G0127100-OS01G0127200|intergenic_region|OS01G0127100-OS01G0127200|||n.1496713_1496714insT||||||
chr01	1496839	T	TA	4035.95	0/0	0/0	0/0	0/0	1|1	0/0	1|1	1|1	0/0	1|1	0/0	0/0	1|1	0/0	0/0	0/0	0/0	0/0	0/0	1|1	0/0	0/0	0/0	0/0	TA|downstream_gene_variant|MODIFIER|OS01G0127200|OS01G0127200|transcript|OS01T0127200-01|protein_coding||c.*703_*704insT|||||401|,TA|intergenic_region|MODIFIER|OS01G0127100-OS01G0127200|OS01G0127100-OS01G0127200|intergenic_region|OS01G0127100-OS01G0127200|||n.1496839_1496840insA||||||
chr01	1497171	ATC	A	8749.98	0/0	0/0	0/0	0/0	1|1	0/0	1|1	1|1	0/0	1|1	0/0	0/0	1|1	0/0	0/0	0/0	0/0	0/0	0/0	1|1	0/0	0/0	0/0	0/0	A|downstream_gene_variant|MODIFIER|OS01G0127200|OS01G0127200|transcript|OS01T0127200-01|protein_coding||c.*370_*371delGA|||||69|,A|intergenic_region|MODIFIER|OS01G0127100-OS01G0127200|OS01G0127100-OS01G0127200|intergenic_region|OS01G0127100-OS01G0127200|||n.1497172_1497173delTC||||||
chr01	1497383	AGC	A	10302	0/0	0/0	0/0	0/0	1|1	0/0	1|1	1|1	0/0	1|1	0/0	0/0	1|1	0/0	0/0	0/0	0/0	0/0	0/0	1|1	0/0	0/0	0/0	0/0	A|3_prime_UTR_variant|MODIFIER|OS01G0127200|OS01G0127200|transcript|OS01T0127200-01|protein_coding|4/4|c.*158_*159delGC|||||158|
chr01	1497490	G	GTAC	7250.01	0/0	0/0	0/0	0/0	1|1	0/0	1|1	1|1	0/0	1|1	0/0	0/0	1|1	0/0	0/0	0/0	0/0	0/0	0/0	1|1	0/0	0/0	0/0	0/0	GTAC|3_prime_UTR_variant|MODIFIER|OS01G0127200|OS01G0127200|transcript|OS01T0127200-01|protein_coding|4/4|c.*52_*53insGTA|||||52|
chr01	1497534	G	GT	7717.01	0/0	0/0	0/0	0/0	1|1	0/0	1|1	1|1	0/0	1|1	0/0	0/0	1|1	0/0	0/0	0/0	0/0	0/0	0/0	1|1	0/0	0/0	0/0	0/0	GT|3_prime_UTR_variant|MODIFIER|OS01G0127200|OS01G0127200|transcript|OS01T0127200-01|protein_coding|4/4|c.*8dupA|||||8|
chr01	1497653	A	ACG	10774	0/0	0/0	0/0	0/0	1|1	0/0	1/1	1|1	0/0	1|1	0/0	0/0	1|1	0/0	0/0	0/0	0/0	0/0	0/0	1/1	0/0	0/0	0/0	0/0	ACG|intron_variant|MODIFIER|OS01G0127200|OS01G0127200|transcript|OS01T0127200-01|protein_coding|3/3|c.1860+32_1860+33insCG||||||
chr01	1498268	CACA	C	13898	0/0	0/0	0/0	0/0	1|1	0/0	1|1	1|1	0/0	1|1	0/0	0/0	1|1	0/0	0/0	0/0	0/0	0/0	0/0	1|1	0/0	0/0	0/0	0/0	C|disruptive_inframe_deletion|MODERATE|OS01G0127200|OS01G0127200|transcript|OS01T0127200-01|protein_coding|3/4|c.1275_1277delTGT|p.Asn425_Val426delinsLys|1349/2288|1275/1914|425/637||
chr01	1499155	TG	T	736.92	0/0	0/0	0/0	0/0	0/0	0/0	0/0	0/0	0/0	0/0	0/0	0/0	1|1	0/0	0/0	0/0	0/0	0/0	0/0	0/0	0/0	0/0	0/0	0/0	T|intron_variant|MODIFIER|OS01G0127200|OS01G0127200|transcript|OS01T0127200-01|protein_coding|2/3|c.415-25delC||||||
chr01	1500105	CGGT	C	4745.97	0/0	0/0	0/0	0/0	1|1	0/0	1|1	1|1	0/0	1|1	0/0	0/0	1|1	0/0	0/0	0/0	0/0	0/0	0/0	1|1	0/0	0/0	0/0	0/0	C|disruptive_inframe_deletion|MODERATE|OS01G0127200|OS01G0127200|transcript|OS01T0127200-01|protein_coding|2/4|c.234_236delACC|p.Pro79del|308/2288|234/1914|78/637||
chr01	1500117	C	CTCG	4413.96	0/0	0/0	0/0	0/0	1/1	0/0	1/1	1/1	0/0	1/1	0/0	0/0	1/1	0/0	0/0	0/0	0/0	0/0	0/0	1/1	0/0	0/0	0/0	0/0	CTCG|disruptive_inframe_insertion|MODERATE|OS01G0127200|OS01G0127200|transcript|OS01T0127200-01|protein_coding|2/4|c.222_224dupCGA|p.Asp74dup|296/2288|224/1914|75/637||
chr01	1500345	C	CACGCAA	10303	0/0	0/0	0/0	0/0	1|1	0/0	1|1	1|1	0/0	1|1	0/0	0/0	1|1	0/0	0/0	0/0	0/0	0/0	0/0	1|1	0/0	0/0	0/0	0/0	CACGCAA|splice_region_variant&intron_variant|LOW|OS01G0127200|OS01G0127200|transcript|OS01T0127200-01|protein_coding|1/3|c.1-5_1-4insTTGCGT||||||
chr01	1500387	G	GT	4317.48	0/0	0/0	0/0	0/0	1|1	0/0	1|1	1|1	0/0	1|1	0/0	0/0	1|1	0/0	0/0	0/0	0/0	0/0	0/0	./.	0/0	0/0	0/0	0/0	GT|intron_variant|MODIFIER|OS01G0127200|OS01G0127200|transcript|OS01T0127200-01|protein_coding|1/3|c.1-47_1-46insA||||||
chr01	1500422	A	AGCAT	4436.23	0/0	0/0	0/0	0/0	1|1	0/0	1|1	1|1	0/0	1|1	0/0	0/0	1|1	0/0	0/0	0/0	0/0	0/0	0/0	1|1	0/0	0/0	0/0	0/0	AGCAT|intron_variant|MODIFIER|OS01G0127200|OS01G0127200|transcript|OS01T0127200-01|protein_coding|1/3|c.1-82_1-81insATGC||||||
chr01	1500427	T	TGTC	5072.88	0/0	0/0	0/0	0/0	1|1	0/0	1|1	1|1	0/0	1|1	0/0	0/0	1|1	0/0	0/0	0/0	0/0	0/0	0/0	1|1	0/0	0/0	0/0	0/0	TGTC|intron_variant|MODIFIER|OS01G0127200|OS01G0127200|transcript|OS01T0127200-01|protein_coding|1/3|c.1-87_1-86insGAC||||||
chr01	1500453	AATTG	A	6596.95	0/0	0/0	0/0	0/0	1|1	0/0	1|1	1|1	0/0	1|1	0/0	0/0	1|1	0/0	0/0	0/0	0/0	0/0	0/0	1|1	0/0	0/0	0/0	0/0	A|intron_variant|MODIFIER|OS01G0127200|OS01G0127200|transcript|OS01T0127200-01|protein_coding|1/3|c.-1+78_-1+81delCAAT||||||
chr01	1500587	GAT	G	12265	0/0	0/0	0/0	0/0	1/1	0/0	1/1	1/1	0/0	1/1	0/0	0/0	1/1	0/0	0/0	0/0	0/0	0/0	0/0	1/1	0/0	0/0	0/0	0/0	G|5_prime_UTR_variant|MODIFIER|OS01G0127200|OS01G0127200|transcript|OS01T0127200-01|protein_coding|1/4|c.-55_-54delAT|||||247|
chr01	1501299	A	AT	10714	0/0	0/0	0/0	0/0	1|1	0/0	1|1	1|1	0/0	1|1	0/0	0/0	1|1	0/0	0/0	0/0	0/0	0/0	0/0	1|1	0/0	0/0	0/0	0/0	AT|upstream_gene_variant|MODIFIER|OS01G0127200|OS01G0127200|transcript|OS01T0127200-01|protein_coding||c.-959_-958insA|||||694|,AT|intergenic_region|MODIFIER|OS01G0127200-OS01G0127300|OS01G0127200-OS01G0127300|intergenic_region|OS01G0127200-OS01G0127300|||n.1501299_1501300insT||||||
chr01	1501428	G	GA	9759.01	0/0	0/0	0/0	0/0	1|1	0/0	1|1	1|1	0/0	1|1	0/0	0/0	1|1	0/0	0/0	0/0	0/0	0/0	0/0	1|1	0/0	0/0	0/0	0/0	GA|upstream_gene_variant|MODIFIER|OS01G0127200|OS01G0127200|transcript|OS01T0127200-01|protein_coding||c.-1088_-1087insT|||||823|,GA|intergenic_region|MODIFIER|OS01G0127200-OS01G0127300|OS01G0127200-OS01G0127300|intergenic_region|OS01G0127200-OS01G0127300|||n.1501428_1501429insA||||||
chr01	1501796	T	TGAAGGTG	6826.01	0/0	0/0	0/0	0/0	1|1	0/0	1|1	1|1	0/0	1|1	0/0	0/0	1|1	0/0	0/0	0/0	0/0	0/0	0/0	1|1	0/0	0/0	0/0	0/0	TGAAGGTG|upstream_gene_variant|MODIFIER|OS01G0127200|OS01G0127200|transcript|OS01T0127200-01|protein_coding||c.-1456_-1455insCACCTTC|||||1191|,TGAAGGTG|intergenic_region|MODIFIER|OS01G0127200-OS01G0127300|OS01G0127200-OS01G0127300|intergenic_region|OS01G0127200-OS01G0127300|||n.1501796_1501797insGAAGGTG||||||
chr01	1502001	T	TG	2920	0/0	0/0	0/0	0/0	1|1	0/0	1/1	1/1	0/0	1|1	0/0	0/0	1|1	0/0	0/0	0/0	0/0	0/0	0/0	1|1	0/0	0/0	0/0	0/0	TG|upstream_gene_variant|MODIFIER|OS01G0127200|OS01G0127200|transcript|OS01T0127200-01|protein_coding||c.-1661_-1660insC|||||1396|,TG|intergenic_region|MODIFIER|OS01G0127200-OS01G0127300|OS01G0127200-OS01G0127300|intergenic_region|OS01G0127200-OS01G0127300|||n.1502001_1502002insG||||||
chr01	1502183	CTCTTTT	C	9507.98	0/0	0/0	0/0	0/0	1/1	0/0	1/1	1/1	0/0	1/1	0/0	0/0	1/1	0/0	0/0	0/0	0/0	0/0	0/0	1/1	0/0	0/0	0/0	0/0	C|upstream_gene_variant|MODIFIER|OS01G0127200|OS01G0127200|transcript|OS01T0127200-01|protein_coding||c.-1848_-1843delAAAAGA|||||1578|,C|downstream_gene_variant|MODIFIER|OS01G0127300|OS01G0127300|transcript|OS01T0127300-01|protein_coding||c.*2065_*2070delAAAAGA|||||1853|,C|intergenic_region|MODIFIER|OS01G0127200-OS01G0127300|OS01G0127200-OS01G0127300|intergenic_region|OS01G0127200-OS01G0127300|||…
chr01	1502319	CT	C	7715.98	0/0	0/0	0/0	0/0	1/1	0/0	1/1	1/1	0/0	1/1	0/0	0/0	1/1	0/0	0/0	0/0	0/0	0/0	0/0	1/1	0/0	0/0	0/0	0/0	C|upstream_gene_variant|MODIFIER|OS01G0127200|OS01G0127200|transcript|OS01T0127200-01|protein_coding||c.-1979delA|||||1714|,C|downstream_gene_variant|MODIFIER|OS01G0127300|OS01G0127300|transcript|OS01T0127300-01|protein_coding||c.*1934delA|||||1717|,C|intergenic_region|MODIFIER|OS01G0127200-OS01G0127300|OS01G0127200-OS01G0127300|intergenic_region|OS01G0127200-OS01G0127300|||n.1502320delT||||||
chr01	1503235	G	GGCAT	8765.01	0/0	0/0	0/0	0/0	1/1	0/0	1/1	1/1	0/0	1/1	0/0	0/0	1/1	0/0	0/0	0/0	0/0	0/0	0/0	1/1	0/0	0/0	0/0	0/0	GGCAT|downstream_gene_variant|MODIFIER|OS01G0127300|OS01G0127300|transcript|OS01T0127300-01|protein_coding||c.*1018_*1019insATGC|||||801|,GGCAT|intergenic_region|MODIFIER|OS01G0127200-OS01G0127300|OS01G0127200-OS01G0127300|intergenic_region|OS01G0127200-OS01G0127300|||n.1503235_1503236insGCAT||||||
chr01	1503288	G	GAAATT	9892.01	0/0	0/0	0/0	0/0	1/1	0/0	1/1	1/1	0/0	1/1	0/0	0/0	1/1	0/0	0/0	0/0	0/0	0/0	0/0	1/1	0/0	0/0	0/0	0/0	GAAATT|downstream_gene_variant|MODIFIER|OS01G0127300|OS01G0127300|transcript|OS01T0127300-01|protein_coding||c.*965_*966insAATTT|||||748|,GAAATT|intergenic_region|MODIFIER|OS01G0127200-OS01G0127300|OS01G0127200-OS01G0127300|intergenic_region|OS01G0127200-OS01G0127300|||n.1503288_1503289insAAATT||||||
chr01	1503479	AGGTACACACTACACT	A	11927	0/0	0/0	0/0	0/0	1/1	0/0	1/1	1/1	0/0	1/1	0/0	0/0	1/1	0/0	0/0	0/0	0/0	0/0	0/0	1/1	0/0	0/0	0/0	0/0	A|downstream_gene_variant|MODIFIER|OS01G0127300|OS01G0127300|transcript|OS01T0127300-01|protein_coding||c.*760_*774delAGTGTAGTGTGTACC|||||557|,A|intergenic_region|MODIFIER|OS01G0127200-OS01G0127300|OS01G0127200-OS01G0127300|intergenic_region|OS01G0127200-OS01G0127300|||n.1503480_1503494delGGTACACACTACACT||||||
chr01	1503901	G	GTGACTGCTCAATTGAGTTTTTTTTGGGATGGAGAGAGTACTCATGTGC	3843.52	0/0	0/0	0/0	0/0	1/1	0/0	1/1	1/1	0/0	1/1	0/0	0/0	1/1	0/0	0/0	0/0	0/0	0/0	0/0	1/1	0/0	0/0	0/0	0/0	GTGACTGCTCAATTGAGTTTTTTTTGGGATGGAGAGAGTACTCATGTGC|downstream_gene_variant|MODIFIER|OS01G0127300|OS01G0127300|transcript|OS01T0127300-01|protein_coding||c.*352_*353insGCACATGAGTACTCTCTCCATCCCAAAAAAAACTCAATTGAGCAGTCA|||||135|,GTGACTGCTCAATTGAGTTTTTTTTGGGATGGAGAGAGTACTCATGTGC|intergenic_region|MODIFIER|OS01G0127200-OS01G0127300|OS01G0127200-OS01G0127300|intergenic_region|OS01G0127200-OS01G0127300|||…
chr01	1503917	G	GTT	9940.01	0/0	0/0	0/0	0/0	1/1	0/0	1/1	1/1	0/0	1/1	0/0	0/0	1/1	0/0	0/0	0/0	0/0	0/0	0/0	1/1	0/0	0/0	0/0	0/0	GTT|downstream_gene_variant|MODIFIER|OS01G0127300|OS01G0127300|transcript|OS01T0127300-01|protein_coding||c.*336_*337insAA|||||119|,GTT|intergenic_region|MODIFIER|OS01G0127200-OS01G0127300|OS01G0127200-OS01G0127300|intergenic_region|OS01G0127200-OS01G0127300|||n.1503917_1503918insTT||||||
chr01	1510030	CT	C	9714.98	0/0	0/0	0/0	0/0	1/1	0/0	1/1	1/1	0/0	1/1	0/0	0/0	1/1	0/0	0/0	0/0	0/0	0/0	0/0	1/1	0/0	0/0	0/0	0/0	C|upstream_gene_variant|MODIFIER|OS01G0127300|OS01G0127300|transcript|OS01T0127300-01|protein_coding||c.-2003delA|||||1974|,C|upstream_gene_variant|MODIFIER|OS01G0127450|OS01G0127450|transcript|OS01T0127450-00|protein_coding||c.-1933delT|||||1933|,C|intron_variant|MODIFIER|OS01G0127400|OS01G0127400|transcript|OS01T0127400-00|protein_coding|5/7|c.817-14delT||||||
chr01	1511472	CA	C	12414	0/0	0/0	0/0	0/0	1/1	0/0	1/1	1/1	0/0	1/1	0/0	0/0	1/1	0/0	0/0	0/0	0/0	0/0	0/0	1/1	0/0	0/0	0/0	0/0	C|upstream_gene_variant|MODIFIER|OS01G0127450|OS01G0127450|transcript|OS01T0127450-00|protein_coding||c.-491delA|||||491|,C|upstream_gene_variant|MODIFIER|OS01G0127500|OS01G0127500|transcript|OS01T0127500-01|protein_coding||c.-1708delA|||||1665|,C|downstream_gene_variant|MODIFIER|OS01G0127400|OS01G0127400|transcript|OS01T0127400-00|protein_coding||c.*793delA|||||702|,C|downstream_gene_variant|MOD…
chr01	1511607	G	GGA	13428	0/0	0/0	0/0	0/0	1/1	0/0	1/1	1/1	0/0	1/1	0/0	0/0	1/1	0/0	0/0	0/0	0/0	0/0	0/0	1/1	0/0	0/0	0/0	0/0	GGA|upstream_gene_variant|MODIFIER|OS01G0127450|OS01G0127450|transcript|OS01T0127450-00|protein_coding||c.-357_-356insGA|||||356|,GGA|upstream_gene_variant|MODIFIER|OS01G0127500|OS01G0127500|transcript|OS01T0127500-01|protein_coding||c.-1574_-1573insGA|||||1530|,GGA|downstream_gene_variant|MODIFIER|OS01G0127400|OS01G0127400|transcript|OS01T0127400-00|protein_coding||c.*927_*928insGA|||||837|,GGA|…
chr01	1511910	CGATCGA	C	22664	0/0	0/0	0/0	0/0	1|1	0/0	1|1	1|1	0/0	1|1	0/0	0/0	1|1	0/0	0/0	0/0	0/0	0/0	0/0	1|1	0/0	0/0	0/0	0/0	C|upstream_gene_variant|MODIFIER|OS01G0127450|OS01G0127450|transcript|OS01T0127450-00|protein_coding||c.-53_-48delGATCGA|||||53|,C|upstream_gene_variant|MODIFIER|OS01G0127500|OS01G0127500|transcript|OS01T0127500-01|protein_coding||c.-1270_-1265delGATCGA|||||1227|,C|downstream_gene_variant|MODIFIER|OS01G0127400|OS01G0127400|transcript|OS01T0127400-00|protein_coding||c.*1231_*1236delGATCGA|||||1140…
chr01	1512159	C	CGTATT	17790	0/0	0/0	0/0	0/0	1/1	0/0	1/1	1/1	0/0	1/1	0/0	0/0	1/1	0/0	0/0	0/0	0/0	0/0	0/0	1/1	0/0	0/0	0/0	0/0	CGTATT|upstream_gene_variant|MODIFIER|OS01G0127500|OS01G0127500|transcript|OS01T0127500-01|protein_coding||c.-1022_-1021insGTATT|||||978|,CGTATT|downstream_gene_variant|MODIFIER|OS01G0127400|OS01G0127400|transcript|OS01T0127400-00|protein_coding||c.*1479_*1480insGTATT|||||1389|,CGTATT|downstream_gene_variant|MODIFIER|EPlOSAG00000027109|EPlOSAG00000027109|transcript|EPlOSAT00000028497|lincRNA||n.*…
chr01	1513558	AACG	A	10672	0/0	0/0	0/0	0/0	1/1	0/0	1/1	1/1	0/0	1/1	0/0	0/0	1/1	0/0	0/0	0/0	0/0	0/0	0/0	1/1	0/0	0/0	0/0	0/0	A|disruptive_inframe_deletion|MODERATE|OS01G0127500|OS01G0127500|transcript|OS01T0127500-01|protein_coding|2/2|c.306_308delCGA|p.Asp102del|349/1209|306/1014|102/337||INFO_REALIGN_3_PRIME,A|upstream_gene_variant|MODIFIER|EPlOSAG00000027109|EPlOSAG00000027109|transcript|EPlOSAT00000028497|lincRNA||n.-662_-660delCGT|||||660|,A|downstream_gene_variant|MODIFIER|OS01G0127450|OS01G0127450|transcript|OS0…
chr01	1514318	AAC	A	13682	0/0	0/0	0/0	0/0	1|1	0/0	1|1	1|1	0/0	1|1	0/0	0/0	1|1	0/0	0/0	0/0	0/0	0/0	0/0	1|1	0/0	0/0	0/0	0/0	A|3_prime_UTR_variant|MODIFIER|OS01G0127500|OS01G0127500|transcript|OS01T0127500-01|protein_coding|2/2|c.*39_*40delAC|||||39|,A|upstream_gene_variant|MODIFIER|EPlOSAG00000027109|EPlOSAG00000027109|transcript|EPlOSAT00000028497|lincRNA||n.-1421_-1420delGT|||||1420|,A|upstream_gene_variant|MODIFIER|OS01G0127600|OS01G0127600|transcript|OS01T0127600-01|protein_coding||c.-1559_-1558delAC|||||1518|,A|d…
chr01	1514438	C	CCGAAA	1945.8	0/0	0/0	0/0	0/0	./.	0/0	./.	./.	0/0	1|1	0/0	0/0	1|1	0/0	0/0	0/0	0/0	0/0	0/0	./.	0/0	0/0	0/0	0/0	CCGAAA|upstream_gene_variant|MODIFIER|EPlOSAG00000027109|EPlOSAG00000027109|transcript|EPlOSAT00000028497|lincRNA||n.-1540_-1539insTTTCG|||||1540|,CCGAAA|upstream_gene_variant|MODIFIER|OS01G0127600|OS01G0127600|transcript|OS01T0127600-01|protein_coding||c.-1440_-1439insCGAAA|||||1398|,CCGAAA|downstream_gene_variant|MODIFIER|OS01G0127450|OS01G0127450|transcript|OS01T0127450-00|protein_coding||c.*1…
chr01	1514440	G	GTTTGTCATGTGGGTCTCACACTAACTTAACCGCTAT	1947.8	0/0	0/0	0/0	0/0	./.	0/0	./.	./.	0/0	1|1	0/0	0/0	1|1	0/0	0/0	0/0	0/0	0/0	0/0	./.	0/0	0/0	0/0	0/0	GTTTGTCATGTGGGTCTCACACTAACTTAACCGCTAT|upstream_gene_variant|MODIFIER|EPlOSAG00000027109|EPlOSAG00000027109|transcript|EPlOSAT00000028497|lincRNA||n.-1542_-1541insATAGCGGTTAAGTTAGTGTGAGACCCACATGACAAA|||||1542|,GTTTGTCATGTGGGTCTCACACTAACTTAACCGCTAT|upstream_gene_variant|MODIFIER|OS01G0127600|OS01G0127600|transcript|OS01T0127600-01|protein_coding||c.-1438_-1437insTTTGTCATGTGGGTCTCACACTAACTTAACCGCTAT…
chr01	1514441	A	AAATGTTTGTCATGTGGGTCTCACACTAACTTAACCGCTATATCGGATAAAACCGGGATAAATACCGC	469.32	0/0	0/0	0/0	0/0	./.	0/0	1|1	./.	0/0	./.	0/0	0/0	0|0	0/0	0/0	0/0	0/0	0/0	0/0	./.	0/0	0/0	0/0	0/0	AAATGTTTGTCATGTGGGTCTCACACTAACTTAACCGCTATATCGGATAAAACCGGGATAAATACCGC|upstream_gene_variant|MODIFIER|EPlOSAG00000027109|EPlOSAG00000027109|transcript|EPlOSAT00000028497|lincRNA||n.-1543_-1542insGCGGTATTTATCCCGGTTTTATCCGATATAGCGGTTAAGTTAGTGTGAGACCCACATGACAAACATT|||||1543|,AAATGTTTGTCATGTGGGTCTCACACTAACTTAACCGCTATATCGGATAAAACCGGGATAAATACCGC|upstream_gene_variant|MODIFIER|OS01G0127600|OS01G0127600|tr…
chr01	1514443	C	CGGATAAAACCGGGATAAATACCGCTTA	897.73	0/0	0/0	0/0	0/0	./.	0/0	./.	./.	0/0	1|1	0/0	0/0	.	0/0	0/0	0/0	0/0	0/0	0/0	./.	0/0	0/0	0/0	0/0	CGGATAAAACCGGGATAAATACCGCTTA|upstream_gene_variant|MODIFIER|EPlOSAG00000027109|EPlOSAG00000027109|transcript|EPlOSAT00000028497|lincRNA||n.-1545_-1544insTAAGCGGTATTTATCCCGGTTTTATCC|||||1545|,CGGATAAAACCGGGATAAATACCGCTTA|upstream_gene_variant|MODIFIER|OS01G0127600|OS01G0127600|transcript|OS01T0127600-01|protein_coding||c.-1435_-1434insGGATAAAACCGGGATAAATACCGCTTA|||||1393|,CGGATAAAACCGGGATAAATACCGC…
chr01	1514947	CGACG	C	8049.88	0/0	0/0	0/0	0/0	1/1	0/0	1/1	1/1	0/0	1/1	0/0	0/0	1/1	0/0	0/0	0/0	0/0	0/0	0/0	1/1	0/0	0/0	0/0	0/0	C|upstream_gene_variant|MODIFIER|OS01G0127600|OS01G0127600|transcript|OS01T0127600-01|protein_coding||c.-930_-927delGACG|||||889|,C|downstream_gene_variant|MODIFIER|OS01G0127500|OS01G0127500|transcript|OS01T0127500-01|protein_coding||c.*668_*671delGACG|||||516|,C|intergenic_region|MODIFIER|OS01G0127500-OS01G0127600|OS01G0127500-OS01G0127600|intergenic_region|OS01G0127500-OS01G0127600|||n.1514948_…
chr01	1515039	ATCAT	A	5734.79	0/0	0/0	0/0	0/0	1/1	0/0	1/1	1/1	0/0	1/1	0/0	0/0	1/1	0/0	0/0	0/0	0/0	0/0	0/0	1/1	0/0	0/0	0/0	0/0	A|upstream_gene_variant|MODIFIER|OS01G0127600|OS01G0127600|transcript|OS01T0127600-01|protein_coding||c.-838_-835delTCAT|||||797|,A|downstream_gene_variant|MODIFIER|OS01G0127500|OS01G0127500|transcript|OS01T0127500-01|protein_coding||c.*760_*763delTCAT|||||608|,A|intergenic_region|MODIFIER|OS01G0127500-OS01G0127600|OS01G0127500-OS01G0127600|intergenic_region|OS01G0127500-OS01G0127600|||n.1515040_…
chr01	1515048	ATG	A	5452.96	0/0	0/0	0/0	0/0	1|1	0/0	1|1	1|1	0/0	1|1	0/0	0/0	1|1	0/0	0/0	0/0	0/0	0/0	0/0	1|1	0/0	0/0	0/0	0/0	A|upstream_gene_variant|MODIFIER|OS01G0127600|OS01G0127600|transcript|OS01T0127600-01|protein_coding||c.-829_-828delTG|||||788|,A|downstream_gene_variant|MODIFIER|OS01G0127500|OS01G0127500|transcript|OS01T0127500-01|protein_coding||c.*769_*770delTG|||||617|,A|intergenic_region|MODIFIER|OS01G0127500-OS01G0127600|OS01G0127500-OS01G0127600|intergenic_region|OS01G0127500-OS01G0127600|||n.1515049_1515…
chr01	1515051	ACATGACCAATTACTCCGT	A	5452.96	0/0	0/0	0/0	0/0	1|1	0/0	1|1	1|1	0/0	1|1	0/0	0/0	1|1	0/0	0/0	0/0	0/0	0/0	0/0	1|1	0/0	0/0	0/0	0/0	A|upstream_gene_variant|MODIFIER|OS01G0127600|OS01G0127600|transcript|OS01T0127600-01|protein_coding||c.-826_-809delCATGACCAATTACTCCGT|||||785|,A|downstream_gene_variant|MODIFIER|OS01G0127500|OS01G0127500|transcript|OS01T0127500-01|protein_coding||c.*772_*789delCATGACCAATTACTCCGT|||||620|,A|intergenic_region|MODIFIER|OS01G0127500-OS01G0127600|OS01G0127500-OS01G0127600|intergenic_region|OS01G01275…
chr01	1515079	A	AG	4928.99	0/0	0/0	0/0	0/0	1|1	0/0	1|1	1|1	0/0	1|1	0/0	0/0	1|1	0/0	0/0	0/0	0/0	0/0	0/0	1|1	0/0	0/0	0/0	0/0	AG|upstream_gene_variant|MODIFIER|OS01G0127600|OS01G0127600|transcript|OS01T0127600-01|protein_coding||c.-799_-798insG|||||757|,AG|downstream_gene_variant|MODIFIER|OS01G0127500|OS01G0127500|transcript|OS01T0127500-01|protein_coding||c.*799_*800insG|||||648|,AG|intergenic_region|MODIFIER|OS01G0127500-OS01G0127600|OS01G0127500-OS01G0127600|intergenic_region|OS01G0127500-OS01G0127600|||n.1515079_151…
chr01	1515096	C	CAATAA	2648.22	0/0	0/0	0/0	0/0	1/1	0/0	1/1	1/1	0/0	1/1	0/0	0/0	1/1	0/0	0/0	0/0	0/0	0/0	0/0	./.	0/0	0/0	0/0	0/0	CAATAA|upstream_gene_variant|MODIFIER|OS01G0127600|OS01G0127600|transcript|OS01T0127600-01|protein_coding||c.-782_-781insAATAA|||||740|,CAATAA|downstream_gene_variant|MODIFIER|OS01G0127500|OS01G0127500|transcript|OS01T0127500-01|protein_coding||c.*816_*817insAATAA|||||665|,CAATAA|intergenic_region|MODIFIER|OS01G0127500-OS01G0127600|OS01G0127500-OS01G0127600|intergenic_region|OS01G0127500-OS01G012…
chr01	1515140	CT	C	580.76	0/0	0/0	0/0	0/0	1/1	0/0	./.	1/1	0/0	1/1	0/0	0/0	./.	0/0	0/0	0/0	0/0	0/0	0/0	0/0	0/0	0/0	0/0	0/0	C|upstream_gene_variant|MODIFIER|OS01G0127600|OS01G0127600|transcript|OS01T0127600-01|protein_coding||c.-737delT|||||696|,C|downstream_gene_variant|MODIFIER|OS01G0127500|OS01G0127500|transcript|OS01T0127500-01|protein_coding||c.*861delT|||||709|,C|intergenic_region|MODIFIER|OS01G0127500-OS01G0127600|OS01G0127500-OS01G0127600|intergenic_region|OS01G0127500-OS01G0127600|||n.1515141delT||||||
chr01	1515161	CTGCA	C	2458	0/0	0/0	0/0	0/0	1|1	0/0	1|1	1|1	0/0	1|1	0/0	0/0	1|1	0/0	0/0	0/0	0/0	0/0	0/0	.	0/0	0/0	0/0	0/0	C|upstream_gene_variant|MODIFIER|OS01G0127600|OS01G0127600|transcript|OS01T0127600-01|protein_coding||c.-716_-713delTGCA|||||675|,C|downstream_gene_variant|MODIFIER|OS01G0127500|OS01G0127500|transcript|OS01T0127500-01|protein_coding||c.*882_*885delTGCA|||||730|,C|intergenic_region|MODIFIER|OS01G0127500-OS01G0127600|OS01G0127500-OS01G0127600|intergenic_region|OS01G0127500-OS01G0127600|||n.1515162_…
chr01	1515266	A	AC	7076.01	0/0	0/0	0/0	0/0	1|1	0/0	1|1	1|1	0/0	1|1	0/0	0/0	1|1	0/0	0/0	0/0	0/0	0/0	0/0	1|1	0/0	0/0	0/0	0/0	AC|upstream_gene_variant|MODIFIER|OS01G0127600|OS01G0127600|transcript|OS01T0127600-01|protein_coding||c.-612_-611insC|||||570|,AC|downstream_gene_variant|MODIFIER|OS01G0127500|OS01G0127500|transcript|OS01T0127500-01|protein_coding||c.*986_*987insC|||||835|,AC|intergenic_region|MODIFIER|OS01G0127500-OS01G0127600|OS01G0127500-OS01G0127600|intergenic_region|OS01G0127500-OS01G0127600|||n.1515266_151…
chr01	1515287	T	TCAGCCG	3327.58	0/0	0/0	0/0	0/0	1|1	0/0	0/0	1|1	0/0	1|1	0/0	0/0	1|1	0/0	0/0	0/0	0/0	0/0	0/0	./.	0/0	0/0	0/0	0/0	TCAGCCG|upstream_gene_variant|MODIFIER|OS01G0127600|OS01G0127600|transcript|OS01T0127600-01|protein_coding||c.-591_-590insCAGCCG|||||549|,TCAGCCG|downstream_gene_variant|MODIFIER|OS01G0127500|OS01G0127500|transcript|OS01T0127500-01|protein_coding||c.*1007_*1008insCAGCCG|||||856|,TCAGCCG|intergenic_region|MODIFIER|OS01G0127500-OS01G0127600|OS01G0127500-OS01G0127600|intergenic_region|OS01G0127500-O…
chr01	1515288	T	TGTTTCCCGTGTTCTGACA	3331.08	0/0	0/0	0/0	0/0	1|1	0/0	./.	1|1	0/0	1|1	0/0	0/0	1|1	0/0	0/0	0/0	0/0	0/0	0/0	./.	0/0	0/0	0/0	0/0	TGTTTCCCGTGTTCTGACA|upstream_gene_variant|MODIFIER|OS01G0127600|OS01G0127600|transcript|OS01T0127600-01|protein_coding||c.-590_-589insGTTTCCCGTGTTCTGACA|||||548|,TGTTTCCCGTGTTCTGACA|downstream_gene_variant|MODIFIER|OS01G0127500|OS01G0127500|transcript|OS01T0127500-01|protein_coding||c.*1008_*1009insGTTTCCCGTGTTCTGACA|||||857|,TGTTTCCCGTGTTCTGACA|intergenic_region|MODIFIER|OS01G0127500-OS01G012760…
chr01	1515908	C	CTGGGA	14786	0/0	0/0	0/0	0/0	1/1	0/0	1|1	1|1	0/0	1|1	0/0	0/0	1|1	0/0	0/0	0/0	0/0	0/0	0/0	1|1	0/0	0/0	0/0	0/0	CTGGGA|frameshift_variant|HIGH|OS01G0127600|OS01G0127600|transcript|OS01T0127600-01|protein_coding|1/1|c.32_36dupTGGGA|p.Ala13fs|78/878|37/540|13/179||INFO_REALIGN_3_PRIME,CTGGGA|downstream_gene_variant|MODIFIER|OS01G0127500|OS01G0127500|transcript|OS01T0127500-01|protein_coding||c.*1628_*1629insTGGGA|||||1477|
chr01	1515987	A	ACGGCGG	11836	0/0	0/0	0/0	0/0	1/1	0/0	1/1	1/1	0/0	1/1	0/0	0/0	1/1	0/0	0/0	0/0	0/0	0/0	0/0	1/1	0/0	0/0	0/0	0/0	ACGGCGG|disruptive_inframe_insertion|MODERATE|OS01G0127600|OS01G0127600|transcript|OS01T0127600-01|protein_coding|1/1|c.113_118dupGCGGCG|p.Gly38_Gly39dup|160/878|119/540|40/179||INFO_REALIGN_3_PRIME,ACGGCGG|downstream_gene_variant|MODIFIER|OS01G0127500|OS01G0127500|transcript|OS01T0127500-01|protein_coding||c.*1707_*1708insCGGCGG|||||1556|
chr01	1516200	G	GCGA	12470	0/0	0/0	0/0	0/0	1|1	0/0	1|1	1|1	0/0	1|1	0/0	0/0	1|1	0/0	0/0	0/0	0/0	0/0	0/0	1|1	0/0	0/0	0/0	0/0	GCGA|disruptive_inframe_insertion|MODERATE|OS01G0127600|OS01G0127600|transcript|OS01T0127600-01|protein_coding|1/1|c.325_326insACG|p.Gly108_Gly109insAsp|367/878|326/540|109/179||INFO_REALIGN_3_PRIME,GCGA|downstream_gene_variant|MODIFIER|OS01G0127500|OS01G0127500|transcript|OS01T0127500-01|protein_coding||c.*1920_*1921insCGA|||||1769|
chr01	1516206	A	ACGGCGAGGGCGAGGGCCT	15246	0/0	0/0	0/0	0/0	1|1	0/0	1|1	1|1	0/0	1|1	0/0	0/0	1|1	0/0	0/0	0/0	0/0	0/0	0/0	1|1	0/0	0/0	0/0	0/0	ACGGCGAGGGCGAGGGCCT|disruptive_inframe_insertion|MODERATE|OS01G0127600|OS01G0127600|transcript|OS01T0127600-01|protein_coding|1/1|c.329_330insCGGCGAGGGCGAGGGCCT|p.Glu110delinsAspGlyGluGlyGluGlyLeu|371/878|330/540|110/179||,ACGGCGAGGGCGAGGGCCT|downstream_gene_variant|MODIFIER|OS01G0127500|OS01G0127500|transcript|OS01T0127500-01|protein_coding||c.*1926_*1927insCGGCGAGGGCGAGGGCCT|||||1775|
chr01	1516717	TCTCAA	T	8739.97	0/0	0/0	0/0	0/0	1/1	0/0	1/1	1/1	0/0	1/1	0/0	0/0	1/1	0/0	0/0	0/0	0/0	0/0	0/0	1/1	0/0	0/0	0/0	0/0	T|upstream_gene_variant|MODIFIER|OS01G0127700|OS01G0127700|transcript|OS01T0127700-01|protein_coding||c.-1661_-1657delCTCAA|||||1529|,T|downstream_gene_variant|MODIFIER|OS01G0127600|OS01G0127600|transcript|OS01T0127600-01|protein_coding||c.*301_*305delCTCAA|||||4|,T|intergenic_region|MODIFIER|OS01G0127600-OS01G0127700|OS01G0127600-OS01G0127700|intergenic_region|OS01G0127600-OS01G0127700|||n.15167…
chr01	1516753	T	TTATTACTAG	9605.01	0/0	0/0	0/0	0/0	1/1	0/0	1/1	1/1	0/0	1/1	0/0	0/0	1/1	0/0	0/0	0/0	0/0	0/0	0/0	1/1	0/0	0/0	0/0	0/0	TTATTACTAG|upstream_gene_variant|MODIFIER|OS01G0127700|OS01G0127700|transcript|OS01T0127700-01|protein_coding||c.-1626_-1625insTATTACTAG|||||1493|,TTATTACTAG|downstream_gene_variant|MODIFIER|OS01G0127600|OS01G0127600|transcript|OS01T0127600-01|protein_coding||c.*336_*337insTATTACTAG|||||40|,TTATTACTAG|intergenic_region|MODIFIER|OS01G0127600-OS01G0127700|OS01G0127600-OS01G0127700|intergenic_region…
chr01	1517228	T	TGG	8252.01	0/0	0/0	0/0	0/0	1/1	0/0	1/1	1/1	0/0	1/1	0/0	0/0	1/1	0/0	0/0	0/0	0/0	0/0	0/0	1/1	0/0	0/0	0/0	0/0	TGG|upstream_gene_variant|MODIFIER|OS01G0127700|OS01G0127700|transcript|OS01T0127700-01|protein_coding||c.-1151_-1150insGG|||||1018|,TGG|downstream_gene_variant|MODIFIER|OS01G0127600|OS01G0127600|transcript|OS01T0127600-01|protein_coding||c.*811_*812insGG|||||515|,TGG|intergenic_region|MODIFIER|OS01G0127600-OS01G0127700|OS01G0127600-OS01G0127700|intergenic_region|OS01G0127600-OS01G0127700|||n.151…
chr01	1517954	T	TA	740.37	0/0	0/0	0/0	0/0	1/1	0/0	1/1	1/1	0/0	1/1	0/0	0/0	./.	0/0	0/0	0/0	0/0	0/0	0/0	1/1	0/0	0/0	0/0	0/0	TA|upstream_gene_variant|MODIFIER|OS01G0127700|OS01G0127700|transcript|OS01T0127700-01|protein_coding||c.-425_-424insA|||||292|,TA|downstream_gene_variant|MODIFIER|OS01G0127600|OS01G0127600|transcript|OS01T0127600-01|protein_coding||c.*1537_*1538insA|||||1241|,TA|intergenic_region|MODIFIER|OS01G0127600-OS01G0127700|OS01G0127600-OS01G0127700|intergenic_region|OS01G0127600-OS01G0127700|||n.1517954_…
chr01	1517986	CAATT	C	1146.89	0/0	0/0	0/0	0/0	1|1	0/0	1|1	1|1	0/0	1|1	0/0	0/0	1/1	0/0	0/0	0/0	0/0	0/0	0/0	1|1	0/0	0/0	0/0	0/0	C|upstream_gene_variant|MODIFIER|OS01G0127700|OS01G0127700|transcript|OS01T0127700-01|protein_coding||c.-392_-389delAATT|||||260|,C|downstream_gene_variant|MODIFIER|OS01G0127600|OS01G0127600|transcript|OS01T0127600-01|protein_coding||c.*1570_*1573delAATT|||||1273|,C|intergenic_region|MODIFIER|OS01G0127600-OS01G0127700|OS01G0127600-OS01G0127700|intergenic_region|OS01G0127600-OS01G0127700|||n.15179…
chr01	1518050	G	GAAAGAGAGAT	182.55	0/0	0/0	0/0	0/0	1|1	0/0	.	./.	0/0	./.	0/0	0/0	1|1	0/0	0/0	0/0	0/0	0/0	0/0	./.	0/0	0/0	0/0	0/0	GAAAGAGAGAT|upstream_gene_variant|MODIFIER|OS01G0127700|OS01G0127700|transcript|OS01T0127700-01|protein_coding||c.-329_-328insAAAGAGAGAT|||||196|,GAAAGAGAGAT|downstream_gene_variant|MODIFIER|OS01G0127600|OS01G0127600|transcript|OS01T0127600-01|protein_coding||c.*1633_*1634insAAAGAGAGAT|||||1337|,GAAAGAGAGAT|intergenic_region|MODIFIER|OS01G0127600-OS01G0127700|OS01G0127600-OS01G0127700|intergenic_…
chr01	1518053	A	AC	187.13	0/0	0/0	0/0	0/0	1|1	0/0	1|1	./.	0/0	./.	0/0	0/0	1|1	0/0	0/0	0/0	0/0	0/0	0/0	./.	0/0	0/0	0/0	0/0	AC|upstream_gene_variant|MODIFIER|OS01G0127700|OS01G0127700|transcript|OS01T0127700-01|protein_coding||c.-326_-325insC|||||193|,AC|downstream_gene_variant|MODIFIER|OS01G0127600|OS01G0127600|transcript|OS01T0127600-01|protein_coding||c.*1636_*1637insC|||||1340|,AC|intergenic_region|MODIFIER|OS01G0127600-OS01G0127700|OS01G0127600-OS01G0127700|intergenic_region|OS01G0127600-OS01G0127700|||n.1518053_…
chr01	1518132	GTTGCCGGCT	G	85.09	0/0	0/0	0/0	0/0	./.	0/0	1/1	./.	0/0	./.	0/0	0/0	./.	0/0	0/0	0/0	0/0	0/0	0/0	./.	0/0	0/0	0/0	0/0	G|upstream_gene_variant|MODIFIER|OS01G0127700|OS01G0127700|transcript|OS01T0127700-01|protein_coding||c.-246_-238delTTGCCGGCT|||||114|,G|downstream_gene_variant|MODIFIER|OS01G0127600|OS01G0127600|transcript|OS01T0127600-01|protein_coding||c.*1716_*1724delTTGCCGGCT|||||1419|,G|intergenic_region|MODIFIER|OS01G0127600-OS01G0127700|OS01G0127600-OS01G0127700|intergenic_region|OS01G0127600-OS01G0127700…
chr01	1518172	AC	A	114.93	0/0	0/0	0/0	0/0	./.	0/0	./.	./.	0/0	./.	0/0	0/0	1/1	0/0	0/0	0/0	0/0	0/0	0/0	./.	0/0	0/0	0/0	0/0	A|upstream_gene_variant|MODIFIER|OS01G0127700|OS01G0127700|transcript|OS01T0127700-01|protein_coding||c.-206delC|||||74|,A|downstream_gene_variant|MODIFIER|OS01G0127600|OS01G0127600|transcript|OS01T0127600-01|protein_coding||c.*1756delC|||||1459|,A|intergenic_region|MODIFIER|OS01G0127600-OS01G0127700|OS01G0127600-OS01G0127700|intergenic_region|OS01G0127600-OS01G0127700|||n.1518173delC||||||
chr01	1518248	A	AC	1084.44	0/0	0/0	0/0	0/0	./.	0/0	./.	./.	0/0	0/0	0/0	0/0	1|1	0/0	0/0	0/0	0/0	0/0	0/0	1|1	0/0	0/0	0/0	0/0	AC|5_prime_UTR_variant|MODIFIER|OS01G0127700|OS01G0127700|transcript|OS01T0127700-01|protein_coding|1/2|c.-127dupC|||||126|INFO_REALIGN_3_PRIME,AC|downstream_gene_variant|MODIFIER|OS01G0127600|OS01G0127600|transcript|OS01T0127600-01|protein_coding||c.*1831_*1832insC|||||1535|
chr01	1518406	AGGT	A	4426.88	0/0	0/0	0/0	0/0	1|1	0/0	1/1	1|1	0/0	1|1	0/0	0/0	1|1	0/0	0/0	0/0	0/0	0/0	0/0	1|1	0/0	0/0	0/0	0/0	A|conservative_inframe_deletion|MODERATE|OS01G0127700|OS01G0127700|transcript|OS01T0127700-01|protein_coding|1/2|c.31_33delTGG|p.Trp11del|163/3253|31/456|11/151||INFO_REALIGN_3_PRIME,A|downstream_gene_variant|MODIFIER|OS01G0127600|OS01G0127600|transcript|OS01T0127600-01|protein_coding||c.*1990_*1992delGGT|||||1693|,A|downstream_gene_variant|MODIFIER|EPlOSAG00000027805|EPlOSAG00000027805|transcrip…
chr01	1518424	G	GGCT	4654.91	0/0	0/0	0/0	0/0	1|1	0/0	1|1	1|1	0/0	1|1	0/0	0/0	1|1	0/0	0/0	0/0	0/0	0/0	0/0	1|1	0/0	0/0	0/0	0/0	GGCT|conservative_inframe_insertion|MODERATE|OS01G0127700|OS01G0127700|transcript|OS01T0127700-01|protein_coding|1/2|c.48_49insTGC|p.Gly16_Gly17insCys|181/3253|49/456|17/151||INFO_REALIGN_3_PRIME,GGCT|downstream_gene_variant|MODIFIER|OS01G0127600|OS01G0127600|transcript|OS01T0127600-01|protein_coding||c.*2007_*2008insGCT|||||1711|,GGCT|downstream_gene_variant|MODIFIER|EPlOSAG00000027805|EPlOSAG00…
chr01	1518462	CGGT	C	6178.96	0/0	0/0	0/0	0/0	1|1	0/0	1|1	1|1	0/0	1|1	0/0	0/0	1|1	0/0	0/0	0/0	0/0	0/0	0/0	1|1	0/0	0/0	0/0	0/0	C|disruptive_inframe_deletion|MODERATE|OS01G0127700|OS01G0127700|transcript|OS01T0127700-01|protein_coding|1/2|c.87_89delTGG|p.Gly30del|219/3253|87/456|29/151||INFO_REALIGN_3_PRIME,C|downstream_gene_variant|MODIFIER|OS01G0127600|OS01G0127600|transcript|OS01T0127600-01|protein_coding||c.*2046_*2048delGGT|||||1749|,C|downstream_gene_variant|MODIFIER|EPlOSAG00000027805|EPlOSAG00000027805|transcript|…
chr01	1518474	CGGCGGCGGCGGG	C	5964.96	0/0	0/0	0/0	0/0	1|1	0/0	1|1	1|1	0/0	1|1	0/0	0/0	1|1	0/0	0/0	0/0	0/0	0/0	0/0	1|1	0/0	0/0	0/0	0/0	C|disruptive_inframe_deletion|MODERATE|OS01G0127700|OS01G0127700|transcript|OS01T0127700-01|protein_coding|1/2|c.98_109delGCGGCGGCGGGG|p.Gly33_Gly36del|230/3253|98/456|33/151||INFO_REALIGN_3_PRIME,C|downstream_gene_variant|MODIFIER|OS01G0127600|OS01G0127600|transcript|OS01T0127600-01|protein_coding||c.*2058_*2069delGGCGGCGGCGGG|||||1761|,C|downstream_gene_variant|MODIFIER|EPlOSAG00000027805|EPlOS…
chr01	1518614	C	CGAG	7099.26	0/0	0/0	0/0	0/0	1|1	0/0	1|1	1|1	0/0	1|1	0/0	0/0	1|1	0/0	0/0	0/0	0/0	0/0	0/0	1|1	0/0	0/0	0/0	0/0	CGAG|disruptive_inframe_insertion|MODERATE|OS01G0127700|OS01G0127700|transcript|OS01T0127700-01|protein_coding|1/2|c.236_237insGAG|p.Ala79_Cys80insSer|369/3253|237/456|79/151||,CGAG|downstream_gene_variant|MODIFIER|OS01G0127600|OS01G0127600|transcript|OS01T0127600-01|protein_coding||c.*2197_*2198insGAG|||||1901|,CGAG|downstream_gene_variant|MODIFIER|EPlOSAG00000027805|EPlOSAG00000027805|transcrip…
chr01	1518623	TA	T	7715.22	0/0	0/0	0/0	0/0	1|1	0/0	1|1	1|1	0/0	1|1	0/0	0/0	1|1	0/0	0/0	0/0	0/0	0/0	0/0	1|1	0/0	0/0	0/0	0/0	T|frameshift_variant|HIGH|OS01G0127700|OS01G0127700|transcript|OS01T0127700-01|protein_coding|1/2|c.246delA|p.Leu82fs|378/3253|246/456|82/151||,T|downstream_gene_variant|MODIFIER|OS01G0127600|OS01G0127600|transcript|OS01T0127600-01|protein_coding||c.*2207delA|||||1910|,T|downstream_gene_variant|MODIFIER|EPlOSAG00000027805|EPlOSAG00000027805|transcript|EPlOSAT00000029193|lincRNA||n.*1671delT|||||1…
chr01	1518627	GCCA	G	8075.22	0/0	0/0	0/0	0/0	1|1	0/0	1|1	1|1	0/0	1|1	0/0	0/0	1|1	0/0	0/0	0/0	0/0	0/0	0/0	1|1	0/0	0/0	0/0	0/0	G|conservative_inframe_deletion|MODERATE|OS01G0127700|OS01G0127700|transcript|OS01T0127700-01|protein_coding|1/2|c.250_252delCCA|p.Pro84del|382/3253|250/456|84/151||,G|downstream_gene_variant|MODIFIER|OS01G0127600|OS01G0127600|transcript|OS01T0127600-01|protein_coding||c.*2211_*2213delCCA|||||1914|,G|downstream_gene_variant|MODIFIER|EPlOSAG00000027805|EPlOSAG00000027805|transcript|EPlOSAT00000029…
chr01	1518634	CATCG	C	8075.22	0/0	0/0	0/0	0/0	1|1	0/0	1|1	1|1	0/0	1|1	0/0	0/0	1|1	0/0	0/0	0/0	0/0	0/0	0/0	1|1	0/0	0/0	0/0	0/0	C|frameshift_variant|HIGH|OS01G0127700|OS01G0127700|transcript|OS01T0127700-01|protein_coding|1/2|c.257_260delATCG|p.His86fs|389/3253|257/456|86/151||,C|downstream_gene_variant|MODIFIER|OS01G0127600|OS01G0127600|transcript|OS01T0127600-01|protein_coding||c.*2218_*2221delATCG|||||1921|,C|downstream_gene_variant|MODIFIER|EPlOSAG00000027805|EPlOSAG00000027805|transcript|EPlOSAT00000029193|lincRNA||n…
chr01	1518639	T	TA	7984.12	0/0	0/0	0/0	0/0	1|1	0/0	1|1	1|1	0/0	1|1	0/0	0/0	1|1	0/0	0/0	0/0	0/0	0/0	0/0	1|1	0/0	0/0	0/0	0/0	TA|frameshift_variant|HIGH|OS01G0127700|OS01G0127700|transcript|OS01T0127700-01|protein_coding|1/2|c.261_262insA|p.Pro88fs|394/3253|262/456|88/151||,TA|downstream_gene_variant|MODIFIER|OS01G0127600|OS01G0127600|transcript|OS01T0127600-01|protein_coding||c.*2222_*2223insA|||||1926|,TA|downstream_gene_variant|MODIFIER|EPlOSAG00000027805|EPlOSAG00000027805|transcript|EPlOSAT00000029193|lincRNA||n.*1…
chr01	1518643	C	CT	8032.12	0/0	0/0	0/0	0/0	1|1	0/0	1|1	1|1	0/0	1|1	0/0	0/0	1|1	0/0	0/0	0/0	0/0	0/0	0/0	1|1	0/0	0/0	0/0	0/0	CT|frameshift_variant|HIGH|OS01G0127700|OS01G0127700|transcript|OS01T0127700-01|protein_coding|1/2|c.268dupT|p.Ser90fs|401/3253|269/456|90/151||INFO_REALIGN_3_PRIME,CT|downstream_gene_variant|MODIFIER|OS01G0127600|OS01G0127600|transcript|OS01T0127600-01|protein_coding||c.*2226_*2227insT|||||1930|,CT|downstream_gene_variant|MODIFIER|EPlOSAG00000027805|EPlOSAG00000027805|transcript|EPlOSAT000000291…
chr01	1518664	G	GCTGCTA	9772.12	0/0	0/0	0/0	0/0	1/1	0/0	1/1	1/1	0/0	1/1	0/0	0/0	1/1	0/0	0/0	0/0	0/0	0/0	0/0	1/1	0/0	0/0	0/0	0/0	GCTGCTA|disruptive_inframe_insertion|MODERATE|OS01G0127700|OS01G0127700|transcript|OS01T0127700-01|protein_coding|1/2|c.287_292dupCTGCTA|p.Ala97_Arg98insThrAla|425/3253|293/456|98/151||INFO_REALIGN_3_PRIME,GCTGCTA|downstream_gene_variant|MODIFIER|OS01G0127600|OS01G0127600|transcript|OS01T0127600-01|protein_coding||c.*2247_*2248insCTGCTA|||||1951|,GCTGCTA|downstream_gene_variant|MODIFIER|EPlOSAG00…
chr01	1518724	T	TC	9156.48	0/0	0/0	0/0	0/0	1|1	0/0	1|1	1|1	0/0	1|1	0/0	0/0	1|1	0/0	0/0	0/0	0/0	0/0	0/0	./.	0/0	0/0	0/0	0/0	TC|frameshift_variant|HIGH|OS01G0127700|OS01G0127700|transcript|OS01T0127700-01|protein_coding|1/2|c.346_347insC|p.Phe116fs|479/3253|347/456|116/151||,TC|downstream_gene_variant|MODIFIER|EPlOSAG00000027805|EPlOSAG00000027805|transcript|EPlOSAT00000029193|lincRNA||n.*1570_*1571insG|||||1570|
chr01	1518725	T	TTTAA	9116.48	0/0	0/0	0/0	0/0	1|1	0/0	1|1	1|1	0/0	1|1	0/0	0/0	1|1	0/0	0/0	0/0	0/0	0/0	0/0	./.	0/0	0/0	0/0	0/0	TTTAA|frameshift_variant&stop_gained|HIGH|OS01G0127700|OS01G0127700|transcript|OS01T0127700-01|protein_coding|1/2|c.349_350insAATT|p.Leu117fs|482/3253|350/456|117/151||INFO_REALIGN_3_PRIME,TTTAA|downstream_gene_variant|MODIFIER|EPlOSAG00000027805|EPlOSAG00000027805|transcript|EPlOSAT00000029193|lincRNA||n.*1569_*1570insTTAA|||||1569|
chr01	1518773	TG	T	7877.64	0/0	0/0	0/0	0/0	1|1	0/0	1|1	1|1	0/0	1|1	0/0	0/0	1|1	0/0	0/0	0/0	0/0	0/0	0/0	0/0	0/0	0/0	0/0	0/0	T|frameshift_variant|HIGH|OS01G0127700|OS01G0127700|transcript|OS01T0127700-01|protein_coding|1/2|c.396delG|p.Leu132fs|528/3253|396/456|132/151||,T|downstream_gene_variant|MODIFIER|EPlOSAG00000027805|EPlOSAG00000027805|transcript|EPlOSAT00000029193|lincRNA||n.*1521delC|||||1521|
chr01	1518826	TATGGGTA	T	10110	0/0	0/0	0/0	0/0	1|1	0/0	1|1	1|1	0/0	1|1	0/0	0/0	1|1	0/0	0/0	0/0	0/0	0/0	0/0	1|1	0/0	0/0	0/0	0/0	T|frameshift_variant&stop_lost|HIGH|OS01G0127700|OS01G0127700|transcript|OS01T0127700-01|protein_coding|1/2|c.455_*5delAATGGGT|p.Ter152fs|587/3253|455/456|152/151||INFO_REALIGN_3_PRIME,T|3_prime_UTR_variant|MODIFIER|OS01G0127700|OS01G0127700|transcript|OS01T0127700-01|protein_coding|1/2|c.455_*5delAATGGGT||||||INFO_REALIGN_3_PRIME,T|downstream_gene_variant|MODIFIER|EPlOSAG00000027805|EPlOSAG00000…
chr01	1518975	A	AATT	11900	0/0	0/0	0/0	0/0	1|1	0/0	1|1	1|1	0/0	1|1	0/0	0/0	1|1	0/0	0/0	0/0	0/0	0/0	0/0	1|1	0/0	0/0	0/0	0/0	AATT|3_prime_UTR_variant|MODIFIER|OS01G0127700|OS01G0127700|transcript|OS01T0127700-01|protein_coding|1/2|c.*141_*142insATT|||||142|,AATT|downstream_gene_variant|MODIFIER|EPlOSAG00000027805|EPlOSAG00000027805|transcript|EPlOSAT00000029193|lincRNA||n.*1319_*1320insAAT|||||1319|
chr01	1519129	C	CA	6718.99	0/0	0/0	0/0	0/0	1|1	0/0	1|1	1|1	0/0	1|1	0/0	0/0	1|1	0/0	0/0	0/0	0/0	0/0	0/0	1|1	0/0	0/0	0/0	0/0	CA|3_prime_UTR_variant|MODIFIER|OS01G0127700|OS01G0127700|transcript|OS01T0127700-01|protein_coding|1/2|c.*301dupA|||||302|INFO_REALIGN_3_PRIME,CA|downstream_gene_variant|MODIFIER|EPlOSAG00000027805|EPlOSAG00000027805|transcript|EPlOSAT00000029193|lincRNA||n.*1165dupT|||||1165|
chr01	1519143	A	ATGT	9100.01	0/0	0/0	0/0	0/0	1|1	0/0	1|1	1|1	0/0	1|1	0/0	0/0	1|1	0/0	0/0	0/0	0/0	0/0	0/0	1|1	0/0	0/0	0/0	0/0	ATGT|3_prime_UTR_variant|MODIFIER|OS01G0127700|OS01G0127700|transcript|OS01T0127700-01|protein_coding|1/2|c.*310_*311insGTT|||||311|INFO_REALIGN_3_PRIME,ATGT|downstream_gene_variant|MODIFIER|EPlOSAG00000027805|EPlOSAG00000027805|transcript|EPlOSAT00000029193|lincRNA||n.*1151_*1152insACA|||||1151|
chr01	1519425	T	TATTTATTGTTTTTTTTTGGGGGAG	15155	0/0	0/0	0/0	0/0	1|1	0/0	1|1	1|1	0/0	1|1	0/0	0/0	1|1	0/0	0/0	0/0	0/0	0/0	0/0	1|1	0/0	0/0	0/0	0/0	TATTTATTGTTTTTTTTTGGGGGAG|3_prime_UTR_variant|MODIFIER|OS01G0127700|OS01G0127700|transcript|OS01T0127700-01|protein_coding|1/2|c.*591_*592insATTTATTGTTTTTTTTTGGGGGAG|||||592|,TATTTATTGTTTTTTTTTGGGGGAG|downstream_gene_variant|MODIFIER|EPlOSAG00000027805|EPlOSAG00000027805|transcript|EPlOSAT00000029193|lincRNA||n.*869_*870insCTCCCCCAAAAAAAAACAATAAAT|||||869|
chr01	1519426	CCT	C	15968	0/0	0/0	0/0	0/0	1|1	0/0	1|1	1|1	0/0	1|1	0/0	0/0	1|1	0/0	0/0	0/0	0/0	0/0	0/0	1|1	0/0	0/0	0/0	0/0	C|3_prime_UTR_variant|MODIFIER|OS01G0127700|OS01G0127700|transcript|OS01T0127700-01|protein_coding|1/2|c.*593_*594delCT|||||593|,C|downstream_gene_variant|MODIFIER|EPlOSAG00000027805|EPlOSAG00000027805|transcript|EPlOSAT00000029193|lincRNA||n.*867_*868delAG|||||868|
chr01	1519430	A	AAATGTAT	13563	0/0	0/0	0/0	0/0	1|1	0/0	1|1	1|1	0/0	1|1	0/0	0/0	1|1	0/0	0/0	0/0	0/0	0/0	0/0	1|1	0/0	0/0	0/0	0/0	AAATGTAT|3_prime_UTR_variant|MODIFIER|OS01G0127700|OS01G0127700|transcript|OS01T0127700-01|protein_coding|1/2|c.*596_*597insAATGTAT|||||597|,AAATGTAT|downstream_gene_variant|MODIFIER|EPlOSAG00000027805|EPlOSAG00000027805|transcript|EPlOSAT00000029193|lincRNA||n.*864_*865insATACATT|||||864|
chr01	1519433	A	ATTG	13070	0/0	0/0	0/0	0/0	1|1	0/0	1|1	1|1	0/0	1|1	0/0	0/0	1|1	0/0	0/0	0/0	0/0	0/0	0/0	1|1	0/0	0/0	0/0	0/0	ATTG|3_prime_UTR_variant|MODIFIER|OS01G0127700|OS01G0127700|transcript|OS01T0127700-01|protein_coding|1/2|c.*601_*602insGTT|||||602|INFO_REALIGN_3_PRIME,ATTG|downstream_gene_variant|MODIFIER|EPlOSAG00000027805|EPlOSAG00000027805|transcript|EPlOSAT00000029193|lincRNA||n.*861_*862insCAA|||||861|
chr01	1519519	C	CGGTAGTGCTCGT	13100	0/0	0/0	0/0	0/0	1|1	0/0	1|1	1|1	0/0	1|1	0/0	0/0	1|1	0/0	0/0	0/0	0/0	0/0	0/0	1|1	0/0	0/0	0/0	0/0	CGGTAGTGCTCGT|3_prime_UTR_variant|MODIFIER|OS01G0127700|OS01G0127700|transcript|OS01T0127700-01|protein_coding|1/2|c.*686_*687insGTAGTGCTCGTG|||||687|INFO_REALIGN_3_PRIME,CGGTAGTGCTCGT|downstream_gene_variant|MODIFIER|EPlOSAG00000027805|EPlOSAG00000027805|transcript|EPlOSAT00000029193|lincRNA||n.*775_*776insACGAGCACTACC|||||775|
chr01	1519527	TGTTA	T	11090	0/0	0/0	0/0	0/0	1|1	0/0	1|1	1|1	0/0	1|1	0/0	0/0	1|1	0/0	0/0	0/0	0/0	0/0	0/0	1|1	0/0	0/0	0/0	0/0	T|3_prime_UTR_variant|MODIFIER|OS01G0127700|OS01G0127700|transcript|OS01T0127700-01|protein_coding|1/2|c.*694_*697delGTTA|||||694|,T|downstream_gene_variant|MODIFIER|EPlOSAG00000027805|EPlOSAG00000027805|transcript|EPlOSAT00000029193|lincRNA||n.*764_*767delTAAC|||||767|
chr01	1519533	CTGT	C	11000	0/0	0/0	0/0	0/0	1|1	0/0	1|1	1|1	0/0	1|1	0/0	0/0	1|1	0/0	0/0	0/0	0/0	0/0	0/0	1|1	0/0	0/0	0/0	0/0	C|3_prime_UTR_variant|MODIFIER|OS01G0127700|OS01G0127700|transcript|OS01T0127700-01|protein_coding|1/2|c.*701_*703delGTT|||||701|INFO_REALIGN_3_PRIME,C|downstream_gene_variant|MODIFIER|EPlOSAG00000027805|EPlOSAG00000027805|transcript|EPlOSAT00000029193|lincRNA||n.*759_*761delACA|||||761|
chr01	1519544	TA	T	10415	0/0	0/0	0/0	0/0	1|1	0/0	1|1	1|1	0/0	1|1	0/0	0/0	1|1	0/0	0/0	0/0	0/0	0/0	0/0	1|1	0/0	0/0	0/0	0/0	T|3_prime_UTR_variant|MODIFIER|OS01G0127700|OS01G0127700|transcript|OS01T0127700-01|protein_coding|1/2|c.*712delA|||||712|INFO_REALIGN_3_PRIME,T|downstream_gene_variant|MODIFIER|EPlOSAG00000027805|EPlOSAG00000027805|transcript|EPlOSAT00000029193|lincRNA||n.*750delT|||||750|
chr01	1519551	AACACAAAG	A	10383.5	0/0	0/0	0/0	0/0	1|1	0/0	1|1	1|1	0/0	1|1	0/0	0/0	1/1	0/0	0/0	0/0	0/0	0/0	0/0	1|1	0/0	0/0	0/0	0/0	A|3_prime_UTR_variant|MODIFIER|OS01G0127700|OS01G0127700|transcript|OS01T0127700-01|protein_coding|1/2|c.*718_*725delACACAAAG|||||718|,A|downstream_gene_variant|MODIFIER|EPlOSAG00000027805|EPlOSAG00000027805|transcript|EPlOSAT00000029193|lincRNA||n.*736_*743delCTTTGTGT|||||743|
chr01	1519565	A	AGTGCTTGATT	11455	0/0	0/0	0/0	0/0	1|1	0/0	1|1	1|1	0/0	1|1	0/0	0/0	1/1	0/0	0/0	0/0	0/0	0/0	0/0	1|1	0/0	0/0	0/0	0/0	AGTGCTTGATT|3_prime_UTR_variant|MODIFIER|OS01G0127700|OS01G0127700|transcript|OS01T0127700-01|protein_coding|1/2|c.*731_*732insGTGCTTGATT|||||732|,AGTGCTTGATT|downstream_gene_variant|MODIFIER|EPlOSAG00000027805|EPlOSAG00000027805|transcript|EPlOSAT00000029193|lincRNA||n.*729_*730insAATCAAGCAC|||||729|
chr01	1519566	AC	A	10531.6	0/0	0/0	0/0	0/0	1/1	0/0	1|1	1|1	0/0	1|1	0/0	0/0	1/1	0/0	0/0	0/0	0/0	0/0	0/0	1|1	0/0	0/0	0/0	0/0	A|3_prime_UTR_variant|MODIFIER|OS01G0127700|OS01G0127700|transcript|OS01T0127700-01|protein_coding|1/2|c.*734delC|||||734|INFO_REALIGN_3_PRIME,A|downstream_gene_variant|MODIFIER|EPlOSAG00000027805|EPlOSAG00000027805|transcript|EPlOSAT00000029193|lincRNA||n.*728delG|||||728|
chr01	1519569	TCG	T	10590	0/0	0/0	0/0	0/0	1/1	0/0	1|1	1|1	0/0	1|1	0/0	0/0	1|1	0/0	0/0	0/0	0/0	0/0	0/0	1|1	0/0	0/0	0/0	0/0	T|3_prime_UTR_variant|MODIFIER|OS01G0127700|OS01G0127700|transcript|OS01T0127700-01|protein_coding|1/2|c.*736_*737delCG|||||736|,T|downstream_gene_variant|MODIFIER|EPlOSAG00000027805|EPlOSAG00000027805|transcript|EPlOSAT00000029193|lincRNA||n.*724_*725delCG|||||725|
chr01	1519574	A	ATC	10775	0/0	0/0	0/0	0/0	1|1	0/0	1|1	1|1	0/0	1|1	0/0	0/0	1|1	0/0	0/0	0/0	0/0	0/0	0/0	1|1	0/0	0/0	0/0	0/0	ATC|3_prime_UTR_variant|MODIFIER|OS01G0127700|OS01G0127700|transcript|OS01T0127700-01|protein_coding|1/2|c.*740_*741insTC|||||741|,ATC|downstream_gene_variant|MODIFIER|EPlOSAG00000027805|EPlOSAG00000027805|transcript|EPlOSAT00000029193|lincRNA||n.*720_*721insGA|||||720|
chr01	1519577	T	TG	10775	0/0	0/0	0/0	0/0	1|1	0/0	1|1	1|1	0/0	1|1	0/0	0/0	1|1	0/0	0/0	0/0	0/0	0/0	0/0	1|1	0/0	0/0	0/0	0/0	TG|3_prime_UTR_variant|MODIFIER|OS01G0127700|OS01G0127700|transcript|OS01T0127700-01|protein_coding|1/2|c.*743_*744insG|||||744|,TG|downstream_gene_variant|MODIFIER|EPlOSAG00000027805|EPlOSAG00000027805|transcript|EPlOSAT00000029193|lincRNA||n.*717_*718insC|||||717|
chr01	1519579	GGC	G	10726	0/0	0/0	0/0	0/0	1|1	0/0	1|1	1|1	0/0	1|1	0/0	0/0	1|1	0/0	0/0	0/0	0/0	0/0	0/0	1|1	0/0	0/0	0/0	0/0	G|3_prime_UTR_variant|MODIFIER|OS01G0127700|OS01G0127700|transcript|OS01T0127700-01|protein_coding|1/2|c.*746_*747delGC|||||746|,G|downstream_gene_variant|MODIFIER|EPlOSAG00000027805|EPlOSAG00000027805|transcript|EPlOSAT00000029193|lincRNA||n.*714_*715delGC|||||715|
chr01	1519582	AC	A	10231	0/0	0/0	0/0	0/0	1|1	0/0	1|1	1|1	0/0	1|1	0/0	0/0	1|1	0/0	0/0	0/0	0/0	0/0	0/0	1|1	0/0	0/0	0/0	0/0	A|3_prime_UTR_variant|MODIFIER|OS01G0127700|OS01G0127700|transcript|OS01T0127700-01|protein_coding|1/2|c.*749delC|||||749|,A|downstream_gene_variant|MODIFIER|EPlOSAG00000027805|EPlOSAG00000027805|transcript|EPlOSAT00000029193|lincRNA||n.*712delG|||||712|
chr01	1519675	T	TTA	10338	0/0	0/0	0/0	0/0	1|1	0/0	1|1	1|1	0/0	1|1	0/0	0/0	1|1	0/0	0/0	0/0	0/0	0/0	0/0	1|1	0/0	0/0	0/0	0/0	TTA|3_prime_UTR_variant|MODIFIER|OS01G0127700|OS01G0127700|transcript|OS01T0127700-01|protein_coding|1/2|c.*841_*842insTA|||||842|,TTA|downstream_gene_variant|MODIFIER|EPlOSAG00000027805|EPlOSAG00000027805|transcript|EPlOSAT00000029193|lincRNA||n.*619_*620insTA|||||619|
chr01	1519724	C	CCTA	11332	0/0	0/0	0/0	0/0	1|1	0/0	1|1	1|1	0/0	1|1	0/0	0/0	1|1	0/0	0/0	0/0	0/0	0/0	0/0	1|1	0/0	0/0	0/0	0/0	CCTA|3_prime_UTR_variant|MODIFIER|OS01G0127700|OS01G0127700|transcript|OS01T0127700-01|protein_coding|1/2|c.*891_*893dupCTA|||||894|INFO_REALIGN_3_PRIME,CCTA|downstream_gene_variant|MODIFIER|EPlOSAG00000027805|EPlOSAG00000027805|transcript|EPlOSAT00000029193|lincRNA||n.*568_*570dupTAG|||||570|
chr01	1519822	TAAGCAGAACACAGAA	T	13390	0/0	0/0	0/0	0/0	1|1	0/0	1|1	1|1	0/0	1|1	0/0	0/0	1|1	0/0	0/0	0/0	0/0	0/0	0/0	1|1	0/0	0/0	0/0	0/0	T|3_prime_UTR_variant|MODIFIER|OS01G0127700|OS01G0127700|transcript|OS01T0127700-01|protein_coding|1/2|c.*989_*1003delAAGCAGAACACAGAA|||||989|,T|downstream_gene_variant|MODIFIER|EPlOSAG00000027805|EPlOSAG00000027805|transcript|EPlOSAT00000029193|lincRNA||n.*458_*472delTTCTGTGTTCTGCTT|||||472|
chr01	1519839	CTGCAAGAAGTCTTTTTG	C	13394	0/0	0/0	0/0	0/0	1|1	0/0	1|1	1|1	0/0	1|1	0/0	0/0	1|1	0/0	0/0	0/0	0/0	0/0	0/0	1|1	0/0	0/0	0/0	0/0	C|3_prime_UTR_variant|MODIFIER|OS01G0127700|OS01G0127700|transcript|OS01T0127700-01|protein_coding|1/2|c.*1007_*1023delGCAAGAAGTCTTTTTGT|||||1007|INFO_REALIGN_3_PRIME,C|downstream_gene_variant|MODIFIER|EPlOSAG00000027805|EPlOSAG00000027805|transcript|EPlOSAT00000029193|lincRNA||n.*439_*455delCAAAAAGACTTCTTGCA|||||455|
chr01	1519927	AT	A	10561.9	0/0	0/0	0/0	0/0	1|1	0/0	1|1	1|1	0/0	1|1	0/0	0/0	1|1	0/0	0/0	0/0	0/0	0/0	0/0	1|1	0/0	0/0	0/0	0/0	A|3_prime_UTR_variant|MODIFIER|OS01G0127700|OS01G0127700|transcript|OS01T0127700-01|protein_coding|1/2|c.*1096delT|||||1096|INFO_REALIGN_3_PRIME,A|upstream_gene_variant|MODIFIER|EPlOSAG00000043671|EPlOSAG00000043671|transcript|EPlOSAT00000045059|lincRNA||n.-1996delT|||||1996|,A|downstream_gene_variant|MODIFIER|EPlOSAG00000027805|EPlOSAG00000027805|transcript|EPlOSAT00000029193|lincRNA||n.*367delA…
chr01	1519977	GTATGCCAT	G	10239	0/0	0/0	0/0	0/0	1|1	0/0	1|1	1|1	0/0	1|1	0/0	0/0	1|1	0/0	0/0	0/0	0/0	0/0	0/0	1|1	0/0	0/0	0/0	0/0	G|3_prime_UTR_variant|MODIFIER|OS01G0127700|OS01G0127700|transcript|OS01T0127700-01|protein_coding|1/2|c.*1150_*1157delATTATGCC|||||1150|INFO_REALIGN_3_PRIME,G|upstream_gene_variant|MODIFIER|EPlOSAG00000043671|EPlOSAG00000043671|transcript|EPlOSAT00000045059|lincRNA||n.-1946_-1939delTATGCCAT|||||1946|,G|downstream_gene_variant|MODIFIER|EPlOSAG00000027805|EPlOSAG00000027805|transcript|EPlOSAT00000…
chr01	1520058	CGCCCCCCCCCCCCCCACACACACACA	C	13129.2	0/0	0/0	0/0	0/0	1|1	0/0	1|1	1|1	0/0	1|1	0/0	0/0	1|1	0/0	0/0	0/0	0/0	0/0	0/0	1|1	0/0	0/0	0/0	0/0	C|3_prime_UTR_variant|MODIFIER|OS01G0127700|OS01G0127700|transcript|OS01T0127700-01|protein_coding|1/2|c.*1225_*1250delGCCCCCCCCCCCCCCACACACACACA|||||1225|,C|upstream_gene_variant|MODIFIER|EPlOSAG00000043671|EPlOSAG00000043671|transcript|EPlOSAT00000045059|lincRNA||n.-1865_-1840delGCCCCCCCCCCCCCCACACACACACA|||||1865|,C|downstream_gene_variant|MODIFIER|EPlOSAG00000027805|EPlOSAG00000027805|transcr…
chr01	1520092	A	AAT	11090	0/0	0/0	0/0	0/0	1|1	0/0	1|1	1|1	0/0	1|1	0/0	0/0	1|1	0/0	0/0	0/0	0/0	0/0	0/0	1|1	0/0	0/0	0/0	0/0	AAT|3_prime_UTR_variant|MODIFIER|OS01G0127700|OS01G0127700|transcript|OS01T0127700-01|protein_coding|1/2|c.*1258_*1259insAT|||||1259|,AAT|upstream_gene_variant|MODIFIER|EPlOSAG00000043671|EPlOSAG00000043671|transcript|EPlOSAT00000045059|lincRNA||n.-1832_-1831insAT|||||1831|,AAT|downstream_gene_variant|MODIFIER|EPlOSAG00000027805|EPlOSAG00000027805|transcript|EPlOSAT00000029193|lincRNA||n.*202_*20…
chr01	1520172	A	AC	15417	0/0	0/0	0/0	0/0	1|1	0/0	1|1	1|1	0/0	1|1	0/0	0/0	1|1	0/0	0/0	0/0	0/0	0/0	0/0	1|1	0/0	0/0	0/0	0/0	AC|3_prime_UTR_variant|MODIFIER|OS01G0127700|OS01G0127700|transcript|OS01T0127700-01|protein_coding|1/2|c.*1338_*1339insC|||||1339|,AC|upstream_gene_variant|MODIFIER|EPlOSAG00000043671|EPlOSAG00000043671|transcript|EPlOSAT00000045059|lincRNA||n.-1752_-1751insC|||||1751|,AC|downstream_gene_variant|MODIFIER|EPlOSAG00000027805|EPlOSAG00000027805|transcript|EPlOSAT00000029193|lincRNA||n.*122_*123insG…
chr01	1520336	GCA	G	12130	0/0	0/0	0/0	0/0	1|1	0/0	1|1	1|1	0/0	1|1	0/0	0/0	1|1	0/0	0/0	0/0	0/0	0/0	0/0	1|1	0/0	0/0	0/0	0/0	G|3_prime_UTR_variant|MODIFIER|OS01G0127700|OS01G0127700|transcript|OS01T0127700-01|protein_coding|1/2|c.*1504_*1505delAC|||||1504|INFO_REALIGN_3_PRIME,G|upstream_gene_variant|MODIFIER|EPlOSAG00000043671|EPlOSAG00000043671|transcript|EPlOSAT00000045059|lincRNA||n.-1587_-1586delCA|||||1587|,G|downstream_gene_variant|MODIFIER|EPlOSAG00000043681|EPlOSAG00000043681|transcript|EPlOSAT00000045069|lincR…
chr01	1520395	TAAA	T	9552.57	0/0	0/0	0/0	0/0	1|1	0/0	1|1	1|1	0/0	1|1	0/0	0/0	1|1	0/0	0/0	0/0	0/0	0/0	0/0	1|1	0/0	0/0	0/0	0/0	T|3_prime_UTR_variant|MODIFIER|OS01G0127700|OS01G0127700|transcript|OS01T0127700-01|protein_coding|1/2|c.*1571_*1573delAAA|||||1571|INFO_REALIGN_3_PRIME,T|upstream_gene_variant|MODIFIER|EPlOSAG00000027805|EPlOSAG00000027805|transcript|EPlOSAT00000029193|lincRNA||n.-5_-3delTTT|||||3|,T|upstream_gene_variant|MODIFIER|EPlOSAG00000043671|EPlOSAG00000043671|transcript|EPlOSAT00000045059|lincRNA||n.-15…
chr01	1521002	C	CATTGTGAGTTGTGACCTTTTTAGATAAAGAGAGTTTT	17089	0/0	0/0	0/0	0/0	1/1	0/0	1/1	1/1	0/0	1/1	0/0	0/0	1/1	0/0	0/0	0/0	0/0	0/0	0/0	1/1	0/0	0/0	0/0	0/0	CATTGTGAGTTGTGACCTTTTTAGATAAAGAGAGTTTT|upstream_gene_variant|MODIFIER|EPlOSAG00000027805|EPlOSAG00000027805|transcript|EPlOSAT00000029193|lincRNA||n.-610_-609insAAAACTCTCTTTATCTAAAAAGGTCACAACTCACAAT|||||610|,CATTGTGAGTTGTGACCTTTTTAGATAAAGAGAGTTTT|upstream_gene_variant|MODIFIER|EPlOSAG00000043671|EPlOSAG00000043671|transcript|EPlOSAT00000045059|lincRNA||n.-922_-921insATTGTGAGTTGTGACCTTTTTAGATAAAGA…
chr01	1521359	G	GGGCGTC	14402	0/0	0/0	0/0	0/0	1/1	0/0	1/1	1/1	0/0	1/1	0/0	0/0	1/1	0/0	0/0	0/0	0/0	0/0	0/0	1/1	0/0	0/0	0/0	0/0	GGGCGTC|3_prime_UTR_variant|MODIFIER|OS01G0127700|OS01G0127700|transcript|OS01T0127700-01|protein_coding|2/2|c.*2434_*2439dupTCGGCG|||||2542|INFO_REALIGN_3_PRIME,GGGCGTC|upstream_gene_variant|MODIFIER|EPlOSAG00000027805|EPlOSAG00000027805|transcript|EPlOSAT00000029193|lincRNA||n.-972_-967dupGACGCC|||||967|,GGGCGTC|upstream_gene_variant|MODIFIER|EPlOSAG00000043671|EPlOSAG00000043671|transcript|EPl…
chr01	1551559	T	TGA	4151.85	0/0	0/0	0/0	0/0	1/1	0/0	1/1	./.	0/0	1/1	0/0	0/0	1/1	0/0	0/0	0/0	0/0	0/0	0/0	./.	0/0	0/0	0/0	0/0	TGA|upstream_gene_variant|MODIFIER|OS01G0128000|OS01G0128000|transcript|OS01T0128000-01|protein_coding||c.-676_-675insTC|||||549|,TGA|intergenic_region|MODIFIER|OS01G0128000-OS01G0128100|OS01G0128000-OS01G0128100|intergenic_region|OS01G0128000-OS01G0128100|||n.1551559_1551560insGA||||||
chr01	1553772	C	CA	711.1	0/0	0/0	0/0	0/0	1/1	0/0	0/0	0/0	0/0	0/0	0/0	0/0	0/0	0/0	0/0	0/0	0/0	0/0	0/0	0/0	0/0	0/0	0/0	0/0	CA|intergenic_region|MODIFIER|OS01G0128000-OS01G0128100|OS01G0128000-OS01G0128100|intergenic_region|OS01G0128000-OS01G0128100|||n.1553772_1553773insA||||||
chr01	1564740	TTA	T	3993.68	0/0	0/0	0/0	./.	1/1	0/0	1/1	1/1	0/0	1/1	0/0	0/0	1/1	0/0	0/0	0/0	0/0	0/0	0/0	1/1	0/0	0/0	0/0	0/0	T|5_prime_UTR_variant|MODIFIER|OS01G0128100|OS01G0128100|transcript|OS01T0128100-01|protein_coding|1/9|c.-320_-319delTA|||||319|,T|upstream_gene_variant|MODIFIER|OS01G0128200|OS01G0128200|transcript|OS01T0128200-01|protein_coding||c.-1425_-1424delTA|||||1406|
chr01	1576825	CT	C	7223.01	0/0	0/0	0/0	0/0	1/1	0/0	1/1	1/1	0/0	1/1	0/0	0/0	1/1	0/0	0/0	0/0	0/0	0/0	0/0	1/1	0/0	0/0	0/0	0/0	C|upstream_gene_variant|MODIFIER|OS01G0128400|OS01G0128400|transcript|OS01T0128400-01|protein_coding||c.-294delA|||||230|,C|intergenic_region|MODIFIER|OS01G0128400-EPlOSAG00000011078|OS01G0128400-EPlOSAG00000011078|intergenic_region|OS01G0128400-EPlOSAG00000011078|||n.1576826delT||||||
chr01	1623103	G	GGA	3396.83	0/0	1/1	0/0	0/0	0/0	1/1	0/0	0/0	0/0	0/0	0/0	0/0	0/0	0/0	0/0	0/0	0/0	0/0	0/0	0/0	0/0	0/0	0/0	0/0	GGA|intergenic_region|MODIFIER|EPlOSAG00000020827-SL1|EPlOSAG00000020827-OS01G0129200|intergenic_region|EPlOSAG00000020827-OS01G0129200|||n.1623103_1623104insGA||||||
chr01	1627713	T	TA	2407.83	0/0	1/1	0/0	0/0	0/0	1/1	0/0	0/0	0/0	0/0	0/0	0/0	0/0	0/0	0/0	0/0	0/0	0/0	0/0	0/0	0/0	0/0	0/0	0/0	TA|downstream_gene_variant|MODIFIER|SL1|OS01G0129200|transcript|OS01T0129200-01|protein_coding||c.*1139_*1140insA|||||1140|,TA|intergenic_region|MODIFIER|SL1-EPlOSAG00000042183|OS01G0129200-EPlOSAG00000042183|intergenic_region|OS01G0129200-EPlOSAG00000042183|||n.1627713_1627714insA||||||
chr01	1649974	A	AT	7406.01	0/0	0/0	0/0	0/0	1/1	0/0	1/1	1/1	0/0	1/1	0/0	0/0	1/1	0/0	0/0	0/0	0/0	0/0	0/0	1/1	0/0	0/0	0/0	0/0	AT|intergenic_region|MODIFIER|OS01G0129500-OS01G0129600|OS01G0129500-OS01G0129600|intergenic_region|OS01G0129500-OS01G0129600|||n.1649974_1649975insT||||||
chr01	1650935	C	CTA	4575.66	0/0	0/0	0/0	0/0	1/1	./.	1/1	./.	0/0	1/1	0/0	0/0	1/1	0/0	0/0	0/0	0/0	0/0	0/0	./.	0/0	0/0	0/0	0/0	CTA|intergenic_region|MODIFIER|OS01G0129500-OS01G0129600|OS01G0129500-OS01G0129600|intergenic_region|OS01G0129500-OS01G0129600|||n.1650935_1650936insTA||||||
chr01	1664228	G	GATATATAT,GAT	258.26	0/0	0/0	0/0	0/0	./.	0/0	0/0	0/0	0/0	0/0	0/0	0/0	0/0	1/1	0/0	0/0	2/2	0/0	0/0	0/0	0/0	0/0	0/0	0/0	GAT|intergenic_region|MODIFIER|EPlOSAG00000036934-OS01G0129800|EPlOSAG00000036934-OS01G0129800|intergenic_region|EPlOSAG00000036934-OS01G0129800|||n.1664228_1664229insAT||||||,GATATATAT|intergenic_region|MODIFIER|EPlOSAG00000036934-OS01G0129800|EPlOSAG00000036934-OS01G0129800|intergenic_region|EPlOSAG00000036934-OS01G0129800|||n.1664228_1664229insATATATAT||||||
chr01	1667251	TA	T	7465.98	0/0	0/0	0/0	0/0	1/1	0/0	1/1	1/1	0/0	1/1	0/0	0/0	1/1	0/0	0/0	0/0	0/0	0/0	0/0	1/1	0/0	0/0	0/0	0/0	T|intergenic_region|MODIFIER|EPlOSAG00000036934-OS01G0129800|EPlOSAG00000036934-OS01G0129800|intergenic_region|EPlOSAG00000036934-OS01G0129800|||n.1667252delA||||||
chr01	1673345	GAAC	G	13861	0/0	0/0	0/0	0/0	1/1	0/0	1/1	1/1	0/0	1/1	0/0	0/0	1/1	0/0	0/0	0/0	0/0	0/0	0/0	1/1	0/0	0/0	0/0	0/0	G|upstream_gene_variant|MODIFIER|OS01G0130100|OS01G0130100|transcript|OS01T0130100-01|protein_coding||c.-521_-519delAAC|||||520|WARNING_TRANSCRIPT_NO_START_CODON,G|downstream_gene_variant|MODIFIER|MTP7|OS01G0130000|transcript|OS01T0130000-01|protein_coding||c.*489_*491delGTT|||||261|,G|downstream_gene_variant|MODIFIER|MTP7|OS01G0130000|transcript|OS01T0130000-02|protein_coding||c.*489_*491delGTT|…
chr01	1675150	CA	C	7660.44	./.	./.	0/0	0/0	1/1	0/0	1/1	1/1	0/0	1/1	0/0	0/0	1/1	0/0	0/0	0/0	0/0	0/0	0/0	1/1	0/0	0/0	0/0	0/0	C|upstream_gene_variant|MODIFIER|MTP7|OS01G0130000|transcript|OS01T0130000-02|protein_coding||c.-109delT|||||108|WARNING_TRANSCRIPT_NO_START_CODON,C|downstream_gene_variant|MODIFIER|OS01G0130100|OS01G0130100|transcript|OS01T0130100-01|protein_coding||c.*952delA|||||459|WARNING_TRANSCRIPT_NO_START_CODON,C|intron_variant|MODIFIER|MTP7|OS01G0130000|transcript|OS01T0130000-01|protein_coding|2/5|c.274…
chr01	1677692	T	TTATA	6658.19	0/0	0/0	0/0	0/0	1/1	0/0	1/1	1/1	0/0	1/1	1/1	0/0	1/1	0/0	0/0	1/1	0/0	0/0	0/0	1/1	0/0	0/0	0/0	0/0	TTATA|upstream_gene_variant|MODIFIER|MTP7|OS01G0130000|transcript|OS01T0130000-01|protein_coding||c.-802_-801insTATA|||||627|,TTATA|intergenic_region|MODIFIER|MTP7-OS01G0130200|OS01G0130000-OS01G0130200|intergenic_region|OS01G0130000-OS01G0130200|||n.1677692_1677693insTATA||||||
chr01	1678755	C	CA	6636.01	0/0	0/0	0/0	0/0	1/1	0/0	1/1	1/1	0/0	1/1	0/0	0/0	1/1	0/0	0/0	0/0	0/0	0/0	0/0	1/1	0/0	0/0	0/0	0/0	CA|upstream_gene_variant|MODIFIER|MTP7|OS01G0130000|transcript|OS01T0130000-01|protein_coding||c.-1865_-1864insT|||||1690|,CA|intergenic_region|MODIFIER|MTP7-OS01G0130200|OS01G0130000-OS01G0130200|intergenic_region|OS01G0130000-OS01G0130200|||n.1678755_1678756insA||||||
chr01	1682245	C	CT	4808.01	0/0	0/0	0/0	0/0	1/1	0/0	1/1	1/1	0/0	1/1	0/0	0/0	1/1	0/0	0/0	0/0	0/0	0/0	0/0	1/1	0/0	0/0	0/0	0/0	CT|intergenic_region|MODIFIER|MTP7-OS01G0130200|OS01G0130000-OS01G0130200|intergenic_region|OS01G0130000-OS01G0130200|||n.1682245_1682246insT||||||
chr01	1682293	T	TAGC,TAGCTTCGAGGCGTCATGTCATTTTC	931.46	0/0	0/0	0/0	0/0	./.	0/0	./.	./.	0/0	2/2	0/0	0/0	./.	0/0	0/0	0/0	0/0	0/0	0/0	1|1	0/0	0/0	0/0	0/0	TAGC|intergenic_region|MODIFIER|MTP7-OS01G0130200|OS01G0130000-OS01G0130200|intergenic_region|OS01G0130000-OS01G0130200|||n.1682293_1682294insAGC||||||,TAGCTTCGAGGCGTCATGTCATTTTC|intergenic_region|MODIFIER|MTP7-OS01G0130200|OS01G0130000-OS01G0130200|intergenic_region|OS01G0130000-OS01G0130200|||n.1682293_1682294insAGCTTCGAGGCGTCATGTCATTTTC||||||
chr01	1682295	T	TCG	286.59	0/0	0/0	0/0	0/0	./.	0/0	./.	./.	0/0	./.	0/0	0/0	./.	0/0	0/0	0/0	0/0	0/0	0/0	1|1	0/0	0/0	0/0	0/0	TCG|intergenic_region|MODIFIER|MTP7-OS01G0130200|OS01G0130000-OS01G0130200|intergenic_region|OS01G0130000-OS01G0130200|||n.1682295_1682296insCG||||||
chr01	1682296	A	AGGCGTCATGTC	289.56	0/0	0/0	0/0	0/0	./.	0/0	./.	./.	0/0	./.	0/0	0/0	./.	0/0	0/0	0/0	0/0	0/0	0/0	1|1	0/0	0/0	0/0	0/0	AGGCGTCATGTC|intergenic_region|MODIFIER|MTP7-OS01G0130200|OS01G0130000-OS01G0130200|intergenic_region|OS01G0130000-OS01G0130200|||n.1682296_1682297insGGCGTCATGTC||||||
chr01	1696839	G	GTCATA	13659	0/0	0/0	0/0	0/0	1/1	0/0	1/1	1/1	0/0	1/1	0/0	0/0	1/1	0/0	0/0	0/0	0/0	0/0	0/0	1/1	0/0	0/0	0/0	0/0	GTCATA|upstream_gene_variant|MODIFIER|EPlOSAG00000031277|EPlOSAG00000031277|transcript|EPlOSAT00000032665|lincRNA||n.-201_-200insTATGA|||||201|,GTCATA|upstream_gene_variant|MODIFIER|OS01G0130400|OS01G0130400|transcript|OS01T0130400-01|protein_coding||c.-1599_-1598insTCATA|||||1363|,GTCATA|downstream_gene_variant|MODIFIER|EPlOSAG00000034488|EPlOSAG00000034488|transcript|EPlOSAT00000035876|lincRNA|…
chr01	1704011	TTA	T	5785.6	0/0	0/0	0/0	0/0	1/1	0/0	1/1	1/1	0/0	1/1	0/0	0/0	1/1	0/0	0/0	0/0	0/0	0/0	0/0	1/1	0/0	0/0	0/0	0/0	T|upstream_gene_variant|MODIFIER|OS01G0130500|OS01G0130500|transcript|OS01T0130500-01|protein_coding||c.-2148_-2147delTA|||||1500|,T|upstream_gene_variant|MODIFIER|EPlOSAG00000033646|EPlOSAG00000033646|transcript|EPlOSAT00000035034|lincRNA||n.-611_-610delTA|||||611|,T|downstream_gene_variant|MODIFIER|OS01G0130400|OS01G0130400|transcript|OS01T0130400-01|protein_coding||c.*1373_*1374delTA|||||922|,…
chr01	1705823	CGCCTCCGCA	C	18839.1	0/0	0/0	0/0	0/0	1/1	0/0	1/1	1/1	0/0	1/1	0/0	1/1	1/1	1/1	0/0	0/0	0/0	0/0	0/0	1/1	0/0	0/0	0/0	0/0	C|upstream_gene_variant|MODIFIER|EPlOSAG00000033174|EPlOSAG00000033174|transcript|EPlOSAT00000034562|lincRNA||n.-1098_-1090delTGCGGAGGC|||||1090|,C|downstream_gene_variant|MODIFIER|EPlOSAG00000033646|EPlOSAG00000033646|transcript|EPlOSAT00000035034|lincRNA||n.*1090_*1098delGCCTCCGCA|||||1090|,C|intergenic_region|MODIFIER|EPlOSAG00000033174-OS01G0130900|EPlOSAG00000033174-OS01G0130900|intergenic_r…
chr01	1708997	A	AT	5521.02	0/0	0/0	0/0	0/0	1/1	0/0	1/1	1/1	0/0	1/1	0/0	0/0	1/1	0/0	0/0	0/0	0/0	0/0	0/0	1/1	0/0	0/0	0/0	0/0	AT|intergenic_region|MODIFIER|EPlOSAG00000033174-OS01G0130900|EPlOSAG00000033174-OS01G0130900|intergenic_region|EPlOSAG00000033174-OS01G0130900|||n.1708997_1708998insT||||||
chr01	1710110	AGG	AGGGG,A,AG,AGGGGGGGGG,AGGG	5479.34	./.	./.	0/0	./.	3/3	4|4	2/2	0/0	0/0	2/2	0/0	1/1	./.	5/5	0/0	0/0	5/5	0/0	0/0	2/2	0/0	1/1	./.	0/0	A|intergenic_region|MODIFIER|EPlOSAG00000033174-OS01G0130900|EPlOSAG00000033174-OS01G0130900|intergenic_region|EPlOSAG00000033174-OS01G0130900|||n.1710111_1710112delGG||||||,AG|intergenic_region|MODIFIER|EPlOSAG00000033174-OS01G0130900|EPlOSAG00000033174-OS01G0130900|intergenic_region|EPlOSAG00000033174-OS01G0130900|||n.1710112delG||||||,AGGG|intergenic_region|MODIFIER|EPlOSAG00000033174-OS01G013…
chr01	1712689	G	GCGC	7751.01	0/0	0/0	0/0	0/0	1/1	0/0	1/1	1/1	0/0	1/1	0/0	0/0	1/1	0/0	0/0	0/0	0/0	0/0	0/0	1/1	0/0	0/0	0/0	0/0	GCGC|conservative_inframe_insertion|MODERATE|OS01G0130900|OS01G0130900|transcript|OS01T0130900-01|protein_coding|1/1|c.160_162dupGCG|p.Ala54dup|258/811|162/525|54/174||
chr01	1726734	CT	C	3315.07	0/0	0/0	0/0	0/0	1/1	0/0	1/1	1/1	0/0	1/1	0/0	0/0	1/1	0/0	0/0	0/0	0/0	0/0	0/0	1/1	0/0	0/0	0/0	0/0	C|intergenic_region|MODIFIER|EPlOSAG00000029819-OS01G0131250|EPlOSAG00000029819-OS01G0131250|intergenic_region|EPlOSAG00000029819-OS01G0131250|||n.1726735delT||||||
chr01	1727071	A	AG	13220	0/0	0/0	0/0	0/0	1|1	0/0	1|1	1|1	0/0	1|1	0/0	0/0	1|1	0/0	0/0	0/0	0/0	0/0	0/0	1|1	0/0	0/0	0/0	0/0	AG|intergenic_region|MODIFIER|EPlOSAG00000029819-OS01G0131250|EPlOSAG00000029819-OS01G0131250|intergenic_region|EPlOSAG00000029819-OS01G0131250|||n.1727071_1727072insG||||||
chr01	1730745	C	CA	2107.64	0/0	0/0	1/1	0/0	0/0	1/1	0/0	0/0	0/0	0/0	0/0	0/0	0/0	0/0	0/0	0/0	0/0	0/0	0/0	0/0	0/0	0/0	0/0	0/0	CA|intergenic_region|MODIFIER|EPlOSAG00000029819-OS01G0131250|EPlOSAG00000029819-OS01G0131250|intergenic_region|EPlOSAG00000029819-OS01G0131250|||n.1730745_1730746insA||||||
chr01	1737230	C	CA	9415.98	0/0	0/0	1/1	0/0	1/1	1/1	1/1	1/1	0/0	1/1	0/0	0/0	1/1	0/0	0/0	0/0	0/0	0/0	0/0	1/1	0/0	0/0	0/0	0/0	CA|5_prime_UTR_variant|MODIFIER|OS01G0131250|OS01G0131250|transcript|OS01T0131250-01|protein_coding|1/1|c.-1806dupT|||||1806|,CA|upstream_gene_variant|MODIFIER|EPlOSAG00000027490|EPlOSAG00000027490|transcript|EPlOSAT00000028878|lincRNA||n.-130dupT|||||130|,CA|upstream_gene_variant|MODIFIER|OS01G0131300|OS01G0131300|transcript|OS01T0131300-01|protein_coding||c.-1735_-1734insA|||||1637|
chr01	1743154	CTGCACTGGTTT	C	10229.4	0/0	0/0	0/0	0/0	1/1	1/1	1/1	1/1	0/0	1/1	0/0	0/0	1/1	0/0	0/0	0/0	0/0	0/0	0/0	1/1	0/0	0/0	0/0	0/0	C|downstream_gene_variant|MODIFIER|EPlOSAG00000013926|EPlOSAG00000013926|transcript|EPlOSAT00000015314|lincRNA||n.*1994_*2004delAAACCAGTGCA|||||2004|,C|intergenic_region|MODIFIER|OS01G0131300-EPlOSAG00000013926|OS01G0131300-EPlOSAG00000013926|intergenic_region|OS01G0131300-EPlOSAG00000013926|||n.1743155_1743165delTGCACTGGTTT||||||
chr01	1745094	A	AG	10608.4	0/0	0/0	0/0	0/0	1/1	1/1	1/1	1/1	0/0	1/1	0/0	0/0	1/1	0/0	0/0	0/0	0/0	0/0	0/0	1/1	0/0	0/0	0/0	0/0	AG|upstream_gene_variant|MODIFIER|OS01G0131600|OS01G0131600|transcript|OS01T0131600-01|protein_coding||c.-1448_-1447insG|||||1321|,AG|downstream_gene_variant|MODIFIER|EPlOSAG00000013926|EPlOSAG00000013926|transcript|EPlOSAT00000015314|lincRNA||n.*64_*65insC|||||64|,AG|downstream_gene_variant|MODIFIER|OS01G0131450|OS01G0131450|transcript|OS01T0131450-00|protein_coding||c.*1352_*1353insC|||||1352|W…
chr01	1765212	CATGGCAAG	C	11976	0/0	0/0	0/0	0/0	0/0	1/1	1/1	1/1	0/0	1/1	0/0	0/0	1/1	0/0	0/0	0/0	0/0	0/0	0/0	1/1	0/0	0/0	0/0	0/0	C|3_prime_UTR_variant|MODIFIER|OS01G0132050|OS01G0132050|transcript|OS01T0132050-01|protein_coding|2/2|c.*842_*849delCTTGCCAT|||||842|,C|upstream_gene_variant|MODIFIER|OS01G0132100|OS01G0132100|transcript|OS01T0132100-00|protein_coding||c.-160_-153delATGGCAAG|||||160|
chr01	1774245	CTT	C	11902	0/0	0/0	0/0	0/0	0/0	1/1	1/1	1/1	0/0	1/1	0/0	0/0	1/1	0/0	0/0	0/0	0/0	0/0	0/0	1/1	0/0	0/0	0/0	0/0	C|upstream_gene_variant|MODIFIER|OS01G0132200|OS01G0132200|transcript|OS01T0132200-01|protein_coding||c.-1900_-1899delAA|||||1836|,C|upstream_gene_variant|MODIFIER|EPlOSAG00000010192|EPlOSAG00000010192|transcript|EPlOSAT00000011580|lincRNA||n.-613_-612delAA|||||612|,C|upstream_gene_variant|MODIFIER|EPlOSAG00000046053|EPlOSAG00000046053|transcript|EPlOSAT00000047441|lincRNA||n.-621_-620delAA|||||6…
chr01	1792068	GAA	G	9620.98	0/0	0/0	0/0	0/0	0/0	1/1	1/1	1/1	0/0	1/1	0/0	0/0	1/1	0/0	0/0	0/0	0/0	0/0	0/0	1/1	0/0	0/0	0/0	0/0	G|upstream_gene_variant|MODIFIER|OS01G0132700|OS01G0132700|transcript|OS01T0132700-01|protein_coding||c.-635_-634delTT|||||613|,G|downstream_gene_variant|MODIFIER|EPlOSAG00000009140|EPlOSAG00000009140|transcript|EPlOSAT00000010528|lincRNA||n.*550_*551delTT|||||551|,G|intergenic_region|MODIFIER|OS01G0132700-EPlOSAG00000009140|OS01G0132700-EPlOSAG00000009140|intergenic_region|OS01G0132700-EPlOSAG00…
chr01	1794924	CATCTATCT	C	7089.98	0/0	0/0	0/0	0/0	0/0	1/1	1/1	1/1	0/0	1/1	0/0	0/0	1/1	0/0	0/0	0/0	0/0	0/0	0/0	1/1	0/0	0/0	0/0	0/0	C|intergenic_region|MODIFIER|EPlOSAG00000009140-OS01G0132766|EPlOSAG00000009140-OS01G0132766|intergenic_region|EPlOSAG00000009140-OS01G0132766|||n.1794925_1794932delATCTATCT||||||
chr01	1803746	T	TGTGAAGTAGACTAGTATATATGTATGTGTCACTTGCTAGATGGAACTAA	13896	0/0	0/0	0/0	0/0	0/0	1/1	1/1	1/1	0/0	1/1	0/0	0/0	1/1	0/0	0/0	0/0	0/0	0/0	0/0	1/1	0/0	0/0	0/0	0/0	TGTGAAGTAGACTAGTATATATGTATGTGTCACTTGCTAGATGGAACTAA|upstream_gene_variant|MODIFIER|OS01G0132766|OS01G0132766|transcript|OS01T0132766-01|protein_coding||c.-609_-608insTTAGTTCCATCTAGCAAGTGACACATACATATATACTAGTCTACTTCAC|||||467|,TGTGAAGTAGACTAGTATATATGTATGTGTCACTTGCTAGATGGAACTAA|intergenic_region|MODIFIER|OS01G0132766-OS01G0132800|OS01G0132766-OS01G0132800|intergenic_region|OS01G0132766-OS01G0132800||…
chr01	1823312	C	CAT	1929.34	0/0	0/0	0/0	0/0	0/0	0/0	0/0	0/0	./.	0/0	0/0	0/0	./.	1/1	0/0	./.	1/1	0/0	./.	./.	0/0	1/1	1/1	0/0	CAT|intergenic_region|MODIFIER|OS01G0132800-EPlOSAG00000026519|OS01G0132800-EPlOSAG00000026519|intergenic_region|OS01G0132800-EPlOSAG00000026519|||n.1823312_1823313insAT||||||
chr01	1825023	CGA	C	1871.95	0/0	0/0	0/0	./.	0/0	1/1	1/1	1/1	0/0	1/1	0/0	0/0	1/1	0/0	0/0	0/0	0/0	0/0	0/0	1/1	0/0	0/0	0/0	0/0	C|upstream_gene_variant|MODIFIER|EPlOSAG00000026519|EPlOSAG00000026519|transcript|EPlOSAT00000027907|lincRNA||n.-295_-294delGA|||||295|,C|downstream_gene_variant|MODIFIER|EPlOSAG00000052220|EPlOSAG00000052220|transcript|EPlOSAT00000000680|lincRNA||n.*395_*396delTC|||||396|,C|intergenic_region|MODIFIER|OS01G0132800-EPlOSAG00000026519|OS01G0132800-EPlOSAG00000026519|intergenic_region|OS01G0132800-E…
chr01	1866812	T	TC	12057.4	0/0	0/0	0/0	0/0	0/0	1/1	1/1	1/1	0/0	1/1	0/0	1/1	1/1	0/0	0/0	0/0	0/0	0/0	0/0	1/1	0/0	0/0	0/0	0/0	TC|upstream_gene_variant|MODIFIER|EPlOSAG00000002487|EPlOSAG00000002487|transcript|EPlOSAT00000003875|lincRNA||n.-1506_-1505insG|||||1506|,TC|upstream_gene_variant|MODIFIER|OS01G0133799|OS01G0133799|transcript|OS01T0133799-00|protein_coding||c.-689_-688insG|||||687|WARNING_TRANSCRIPT_NO_START_CODON,TC|downstream_gene_variant|MODIFIER|OS01G0133700|OS01G0133700|transcript|OS01T0133700-00|protein_co…
chr01	1871594	G	GA	9669.42	0/0	0/0	0/0	0/0	0/0	1/1	1/1	1/1	0/0	1/1	0/0	1/1	1/1	0/0	0/0	0/0	0/0	0/0	0/0	1/1	0/0	0/0	0/0	0/0	GA|upstream_gene_variant|MODIFIER|OS01G0133866|OS01G0133866|transcript|OS01T0133866-00|protein_coding||c.-1525_-1524insT|||||1524|WARNING_TRANSCRIPT_NO_START_CODON,GA|downstream_gene_variant|MODIFIER|OS01G0133900|OS01G0133900|transcript|OS01T0133900-00|protein_coding||c.*1441_*1442insA|||||1187|WARNING_TRANSCRIPT_NO_START_CODON,GA|intergenic_region|MODIFIER|OS01G0133900-EPlOSAG00000012533|OS01G01…
chr01	1896210	TA	T	5993.48	0/0	0/0	0/0	0/0	0/0	1/1	1/1	1/1	0/0	1/1	0/0	1/1	1/1	0/0	0/0	0/0	0/0	0/0	0/0	1/1	0/0	0/0	0/0	0/0	T|intergenic_region|MODIFIER|OS01G0134500-OS01G0134700|OS01G0134500-OS01G0134700|intergenic_region|OS01G0134500-OS01G0134700|||n.1896211delA||||||
chr01	1912581	T	TTA	256.05	0/0	0/0	0/0	0/0	0/0	0/0	0/0	0/0	0/0	1/1	0/0	0/0	0/0	0/0	0/0	0/0	0/0	0/0	0/0	0/0	0/0	0/0	0/0	0/0	TTA|3_prime_UTR_variant|MODIFIER|OS01G0134900|OS01G0134900|transcript|OS01T0134900-01|protein_coding|3/3|c.*237_*238dupTA|||||238|,TTA|upstream_gene_variant|MODIFIER|OS01G0135000|OS01G0135000|transcript|OS01T0135000-01|protein_coding||c.-2442_-2441insTA|||||1915|
chr01	1923763	ACAGGCGCGGG	A	7922.08	0/0	0/0	0/0	0/0	0/0	1/1	1/1	1/1	0/0	1/1	0/0	1/1	1/1	0/0	0/0	0/0	0/0	0/0	0/0	1/1	0/0	0/0	0/0	0/0	A|intergenic_region|MODIFIER|OS01G0135000-OS01G0135600|OS01G0135000-OS01G0135600|intergenic_region|OS01G0135000-OS01G0135600|||n.1923764_1923773delCAGGCGCGGG||||||
chr01	1935259	T	TA	10827.4	0/0	0/0	0/0	0/0	0/0	1/1	1/1	1/1	0/0	1/1	0/0	1/1	1/1	0/0	0/0	0/0	0/0	0/0	0/0	1/1	0/0	0/0	0/0	0/0	TA|downstream_gene_variant|MODIFIER|HSP16.6|OS01G0135800|transcript|OS01T0135800-01|protein_coding||c.*560_*561insA|||||336|,TA|intergenic_region|MODIFIER|HSP16.6-HSP17.9B|OS01G0135800-OS01G0135900|intergenic_region|OS01G0135800-OS01G0135900|||n.1935259_1935260insA||||||
chr01	1941918	CT	C	9447.42	0/0	0/0	0/0	0/0	0/0	1/1	1/1	1/1	0/0	1/1	0/0	1/1	1/1	0/0	0/0	0/0	0/0	0/0	0/0	1/1	0/0	0/0	0/0	0/0	C|upstream_gene_variant|MODIFIER|EPlOSAG00000052601|EPlOSAG00000052601|transcript|EPlOSAT00000000299|lincRNA||n.-106delT|||||106|,C|downstream_gene_variant|MODIFIER|HSP17.9B|OS01G0135900|transcript|OS01T0135900-02|protein_coding||c.*270delT|||||74|,C|downstream_gene_variant|MODIFIER|HSP17.9B|OS01G0135900|transcript|OS01T0135900-01|protein_coding||c.*536delT|||||68|,C|intergenic_region|MODIFIER|HS…
chr01	1946332	A	ATT	11773.4	0/0	0/0	0/0	0/0	0/0	1/1	1/1	1/1	0/0	1/1	0/0	1/1	1/1	0/0	0/0	0/0	0/0	0/0	0/0	1/1	0/0	0/0	0/0	0/0	ATT|upstream_gene_variant|MODIFIER|HSP16.9C|OS01G0136000|transcript|OS01T0136000-00|protein_coding||c.-1411_-1410insAA|||||1385|,ATT|downstream_gene_variant|MODIFIER|OS01G0136050|OS01G0136050|transcript|OS01T0136050-00|protein_coding||c.*1364_*1365insTT|||||1365|WARNING_TRANSCRIPT_NO_START_CODON,ATT|intergenic_region|MODIFIER|OS01G0136050-HSP16.9A|OS01G0136050-OS01G0136100|intergenic_region|OS01G…
chr01	1950808	A	AT	25516.5	1/1	1/1	1/1	1/1	1/1	0/0	0/0	0/0	1/1	0/0	1/1	0/0	0/0	1/1	1/1	1/1	1/1	1/1	1/1	0/0	1/1	1/1	1/1	1/1	AT|upstream_gene_variant|MODIFIER|HSP16.9A|OS01G0136100|transcript|OS01T0136100-01|protein_coding||c.-1352_-1351insA|||||1222|,AT|upstream_gene_variant|MODIFIER|HSP16.9B|OS01G0136200|transcript|OS01T0136200-01|protein_coding||c.-1239_-1238insT|||||1121|,AT|intergenic_region|MODIFIER|HSP16.9A-HSP16.9B|OS01G0136100-OS01G0136200|intergenic_region|OS01G0136100-OS01G0136200|||n.1950808_1950809insT||||…
chr01	1953777	C	CA	8357.41	./.	0/0	0/0	0/0	0/0	1/1	1/1	1/1	0/0	1/1	0/0	1/1	1/1	0/0	0/0	0/0	0/0	0/0	0/0	1/1	0/0	0/0	0/0	0/0	CA|downstream_gene_variant|MODIFIER|HSP16.9B|OS01G0136200|transcript|OS01T0136200-01|protein_coding||c.*1278_*1279insA|||||1097|,CA|downstream_gene_variant|MODIFIER|OS01G0136300|OS01G0136300|transcript|OS01T0136300-01|protein_coding||c.*1636_*1637insT|||||1403|,CA|intergenic_region|MODIFIER|HSP16.9B-OS01G0136300|OS01G0136200-OS01G0136300|intergenic_region|OS01G0136200-OS01G0136300|||n.1953777_195…
chr01	1974014	CTGTACATCATTTGTTGAGT	C	16502.4	0/0	0/0	0/0	0/0	0/0	1/1	1/1	1/1	0/0	1/1	0/0	1/1	1/1	0/0	0/0	0/0	0/0	0/0	0/0	1/1	0/0	0/0	0/0	0/0	C|3_prime_UTR_variant|MODIFIER|OS01G0136700|OS01G0136700|transcript|OS01T0136700-01|protein_coding|1/1|c.*484_*502delACTCAACAAATGATGTACA|||||484|WARNING_TRANSCRIPT_NO_START_CODON
chr01	2005330	TGA	T	7866.41	0/0	./.	0/0	0/0	0/0	1/1	1/1	1/1	0/0	1/1	0/0	1/1	1/1	0/0	0/0	0/0	0/0	0/0	0/0	1/1	0/0	0/0	0/0	0/0	T|upstream_gene_variant|MODIFIER|OS01G0137300|OS01G0137300|transcript|OS01T0137300-01|protein_coding||c.-3346_-3345delTC|||||1418|,T|intergenic_region|MODIFIER|OS01G0137300-EPlOSAG00000018036|OS01G0137300-EPlOSAG00000018036|intergenic_region|OS01G0137300-EPlOSAG00000018036|||n.2005331_2005332delGA||||||
chr01	2013074	AT	A	13177.4	0/0	0/0	0/0	0/0	0/0	1/1	1/1	1/1	0/0	1/1	0/0	1/1	1/1	0/0	0/0	0/0	0/0	0/0	0/0	1/1	0/0	0/0	0/0	0/0	A|upstream_gene_variant|MODIFIER|EPlOSAG00000018036|EPlOSAG00000018036|transcript|EPlOSAT00000019424|lincRNA||n.-1604delT|||||1604|,A|upstream_gene_variant|MODIFIER|OS01G0137500|OS01G0137500|transcript|OS01T0137500-01|protein_coding||c.-3969delT|||||1716|WARNING_TRANSCRIPT_NO_START_CODON,A|intergenic_region|MODIFIER|OS01G0137300-EPlOSAG00000018036|OS01G0137300-EPlOSAG00000018036|intergenic_region…
chr01	2038832	A	AC	689.1	0/0	0/0	0/0	0/0	0/0	0/0	0/0	0/0	0/0	0/0	0/0	0/0	1/1	0/0	0/0	0/0	0/0	0/0	0/0	0/0	0/0	0/0	0/0	0/0	AC|upstream_gene_variant|MODIFIER|OS01G0137875|OS01G0137875|transcript|OS01T0137875-00|lincRNA||n.-832_-831insG|||||832|,AC|downstream_gene_variant|MODIFIER|OS01G0137950|OS01G0137950|transcript|OS01T0137950-01|protein_coding||c.*933_*934insC|||||635|WARNING_TRANSCRIPT_NO_START_CODON,AC|intergenic_region|MODIFIER|OS01G0137950-OS01G0138000|OS01G0137950-OS01G0138000|intergenic_region|OS01G0137950-OS…
chr01	2044932	A	AT	9429.42	0/0	0/0	0/0	0/0	0/0	1/1	1/1	1/1	0/0	1/1	0/0	1/1	1/1	0/0	0/0	0/0	0/0	0/0	0/0	1/1	0/0	0/0	0/0	0/0	AT|downstream_gene_variant|MODIFIER|OS01G0138100|OS01G0138100|transcript|OS01T0138100-01|protein_coding||c.*1536_*1537insA|||||1213|WARNING_TRANSCRIPT_NO_START_CODON,AT|intergenic_region|MODIFIER|OS01G0138000-OS01G0138100|OS01G0138000-OS01G0138100|intergenic_region|OS01G0138000-OS01G0138100|||n.2044932_2044933insT||||||
chr01	2058863	AG	A	13499.4	0/0	0/0	0/0	0/0	0/0	1/1	1/1	1/1	0/0	1/1	0/0	1/1	1/1	0/0	0/0	0/0	0/0	0/0	0/0	1/1	0/0	0/0	0/0	0/0	A|upstream_gene_variant|MODIFIER|OS01G0138500|OS01G0138500|transcript|OS01T0138500-01|protein_coding||c.-579delG|||||445|,A|downstream_gene_variant|MODIFIER|OS01G0138400|OS01G0138400|transcript|OS01T0138400-01|protein_coding||c.*1450delG|||||1228|,A|intergenic_region|MODIFIER|OS01G0138400-OS01G0138500|OS01G0138400-OS01G0138500|intergenic_region|OS01G0138400-OS01G0138500|||n.2058864delG||||||
chr01	2071104	A	AT	12118	0/0	0/0	1/1	0/0	0/0	1/1	1/1	1/1	0/0	1/1	0/0	1/1	1/1	0/0	0/0	0/0	0/0	0/0	0/0	1/1	0/0	0/0	0/0	0/0	AT|upstream_gene_variant|MODIFIER|OS01G0138800|OS01G0138800|transcript|OS01T0138800-01|protein_coding||c.-866_-865insT|||||738|,AT|intergenic_region|MODIFIER|EPlOSAG00000007128-OS01G0138800|EPlOSAG00000007128-OS01G0138800|intergenic_region|EPlOSAG00000007128-OS01G0138800|||n.2071104_2071105insT||||||
chr01	2071493	AC	A	16610.9	0/0	0/0	1/1	0/0	0/0	1/1	1/1	1/1	0/0	1/1	0/0	1/1	1/1	0/0	0/0	0/0	0/0	0/0	0/0	1/1	0/0	0/0	0/0	0/0	A|upstream_gene_variant|MODIFIER|OS01G0138800|OS01G0138800|transcript|OS01T0138800-01|protein_coding||c.-476delC|||||349|,A|intergenic_region|MODIFIER|EPlOSAG00000007128-OS01G0138800|EPlOSAG00000007128-OS01G0138800|intergenic_region|EPlOSAG00000007128-OS01G0138800|||n.2071494delC||||||
chr01	2072937	GGCC	G	16293.9	0/0	0/0	1/1	0/0	0/0	1/1	1/1	1/1	0/0	1/1	0/0	1/1	1/1	0/0	0/0	0/0	0/0	0/0	0/0	1/1	0/0	0/0	0/0	0/0	G|conservative_inframe_deletion|MODERATE|OS01G0138800|OS01G0138800|transcript|OS01T0138800-01|protein_coding|2/3|c.880_882delGCC|p.Ala294del|1007/1564|880/1296|294/431||INFO_REALIGN_3_PRIME,G|downstream_gene_variant|MODIFIER|OS01G0138900|OS01G0138900|transcript|OS01T0138900-01|protein_coding||c.*2155_*2157delGGC|||||1857|
chr01	2074431	G	GA	21369	0/0	0/0	1|1	0/0	0/0	1|1	1|1	1|1	0/0	1|1	0/0	1|1	1|1	0/0	0/0	0/0	0/0	0/0	0/0	1|1	0/0	0/0	0/0	0/0	GA|downstream_gene_variant|MODIFIER|OS01G0138800|OS01G0138800|transcript|OS01T0138800-01|protein_coding||c.*963_*964insA|||||823|,GA|downstream_gene_variant|MODIFIER|OS01G0138900|OS01G0138900|transcript|OS01T0138900-01|protein_coding||c.*663_*664insT|||||363|,GA|intergenic_region|MODIFIER|OS01G0138800-OS01G0138900|OS01G0138800-OS01G0138900|intergenic_region|OS01G0138800-OS01G0138900|||n.2074431_2…
chr01	2074565	TAA	T	15486.9	0/0	0/0	1/1	0/0	0/0	1/1	1/1	1/1	0/0	1/1	0/0	1/1	1/1	0/0	0/0	0/0	0/0	0/0	0/0	1/1	0/0	0/0	0/0	0/0	T|downstream_gene_variant|MODIFIER|OS01G0138800|OS01G0138800|transcript|OS01T0138800-01|protein_coding||c.*1098_*1099delAA|||||957|,T|downstream_gene_variant|MODIFIER|OS01G0138900|OS01G0138900|transcript|OS01T0138900-01|protein_coding||c.*528_*529delTT|||||229|,T|intergenic_region|MODIFIER|OS01G0138800-OS01G0138900|OS01G0138800-OS01G0138900|intergenic_region|OS01G0138800-OS01G0138900|||n.2074566_…
chr01	2075711	AT	A	5350.94	0/0	0/0	1/1	0/0	0/0	1/1	1/1	1/1	0/0	1/1	0/0	1/1	1/1	0/0	0/0	0/0	0/0	0/0	0/0	1/1	0/0	0/0	0/0	0/0	A|intron_variant|MODIFIER|OS01G0138900|OS01G0138900|transcript|OS01T0138900-01|protein_coding|4/6|c.1199+78delA||||||
chr01	2075765	A	AT	10429	0/0	0/0	1|1	0/0	0/0	1|1	1|1	1|1	0/0	1|1	0/0	1|1	1|1	0/0	0/0	0/0	0/0	0/0	0/0	1|1	0/0	0/0	0/0	0/0	AT|intron_variant|MODIFIER|OS01G0138900|OS01G0138900|transcript|OS01T0138900-01|protein_coding|4/6|c.1199+24_1199+25insA||||||
chr01	2078206	T	TA	18045.9	0/0	0/0	1|1	0/0	0/0	1|1	1|1	1|1	0/0	0/0	0/0	1|1	1|1	0/0	0/0	0/0	0/0	0/0	0/0	1|1	0/0	0/0	0/0	0/0	TA|upstream_gene_variant|MODIFIER|OS01G0138900|OS01G0138900|transcript|OS01T0138900-01|protein_coding||c.-367_-366insT|||||304|,TA|upstream_gene_variant|MODIFIER|OS01G0139000|OS01G0139000|transcript|OS01T0139000-00|protein_coding||c.-1906_-1905insA|||||1905|,TA|intergenic_region|MODIFIER|OS01G0138900-OS01G0139000|OS01G0138900-OS01G0139000|intergenic_region|OS01G0138900-OS01G0139000|||n.2078206_20…
chr01	2081688	AG	A	16458.9	0/0	0/0	1/1	0/0	0/0	1/1	1/1	1/1	0/0	1/1	0/0	1/1	1/1	0/0	0/0	0/0	0/0	0/0	0/0	1/1	0/0	0/0	0/0	0/0	A|downstream_gene_variant|MODIFIER|OS01G0139000|OS01G0139000|transcript|OS01T0139000-00|protein_coding||c.*386delG|||||386|,A|intergenic_region|MODIFIER|OS01G0139000-OS01G0139200|OS01G0139000-OS01G0139200|intergenic_region|OS01G0139000-OS01G0139200|||n.2081689delG||||||
chr01	2082399	T	TCACTCGCATCCGATGGCGGCAG	25108	0/0	0/0	1/1	0/0	0/0	1/1	1/1	1/1	0/0	1/1	0/0	1/1	1/1	0/0	0/0	0/0	0/0	0/0	0/0	1/1	0/0	0/0	0/0	0/0	TCACTCGCATCCGATGGCGGCAG|downstream_gene_variant|MODIFIER|OS01G0139000|OS01G0139000|transcript|OS01T0139000-00|protein_coding||c.*1096_*1097insCACTCGCATCCGATGGCGGCAG|||||1097|,TCACTCGCATCCGATGGCGGCAG|intergenic_region|MODIFIER|OS01G0139000-OS01G0139200|OS01G0139000-OS01G0139200|intergenic_region|OS01G0139000-OS01G0139200|||n.2082399_2082400insCACTCGCATCCGATGGCGGCAG||||||
chr01	2090483	GC	G	2040.79	0/0	0/0	0/0	0/0	0/0	0/0	0/0	1/1	0/0	0/0	0/0	0/0	1/1	0/0	0/0	0/0	0/0	0/0	0/0	0/0	0/0	0/0	0/0	0/0	G|intergenic_region|MODIFIER|OS01G0139200-OS01G0139600|OS01G0139200-OS01G0139600|intergenic_region|OS01G0139200-OS01G0139600|||n.2090484delC||||||
chr01	2093117	C	CTT	13394	0/0	0/0	1/1	0/0	0/0	1/1	1/1	1/1	0/0	1/1	0/0	1/1	1/1	0/0	0/0	0/0	0/0	0/0	0/0	1/1	0/0	0/0	0/0	0/0	CTT|intergenic_region|MODIFIER|OS01G0139200-OS01G0139600|OS01G0139200-OS01G0139600|intergenic_region|OS01G0139200-OS01G0139600|||n.2093117_2093118insTT||||||
chr01	2096327	G	GA	10672	0/0	0/0	1/1	0/0	0/0	1/1	1/1	1/1	0/0	1/1	0/0	1/1	1/1	0/0	0/0	0/0	0/0	0/0	0/0	1/1	0/0	0/0	0/0	0/0	GA|upstream_gene_variant|MODIFIER|OS01G0139600|OS01G0139600|transcript|OS01T0139600-01|protein_coding||c.-1350_-1349insA|||||864|,GA|intergenic_region|MODIFIER|OS01G0139200-OS01G0139600|OS01G0139200-OS01G0139600|intergenic_region|OS01G0139200-OS01G0139600|||n.2096327_2096328insA||||||
chr01	2103246	AT	A	3921.04	0/0	0/0	1/1	0/0	0/0	1/1	1/1	1/1	0/0	1/1	1/1	1/1	1/1	0/0	0/0	1/1	0/0	0/0	0/0	1/1	0/0	0/0	0/0	0/0	A|upstream_gene_variant|MODIFIER|OS01G0139700|OS01G0139700|transcript|OS01T0139700-01|protein_coding||c.-647delA|||||575|,A|intergenic_region|MODIFIER|OS01G0139700-OS01G0139900|OS01G0139700-OS01G0139900|intergenic_region|OS01G0139700-OS01G0139900|||n.2103247delT||||||
chr01	2103258	A	AT	2644.52	0/0	0/0	1/1	0/0	0/0	1/1	1/1	1/1	0/0	./.	1/1	1/1	1/1	0/0	0/0	1/1	0/0	0/0	0/0	1/1	0/0	0/0	0/0	0/0	AT|upstream_gene_variant|MODIFIER|OS01G0139700|OS01G0139700|transcript|OS01T0139700-01|protein_coding||c.-659_-658insA|||||587|,AT|intergenic_region|MODIFIER|OS01G0139700-OS01G0139900|OS01G0139700-OS01G0139900|intergenic_region|OS01G0139700-OS01G0139900|||n.2103258_2103259insT||||||
chr01	2104309	ACATCATTATTCACTAACAAG	A	23790.2	0/0	0/0	1/1	0/0	0/0	1/1	1/1	1/1	0/0	1/1	1/1	1/1	1/1	0/0	0/0	1/1	0/0	0/0	0/0	1/1	0/0	0/0	0/0	0/0	A|upstream_gene_variant|MODIFIER|OS01G0139700|OS01G0139700|transcript|OS01T0139700-01|protein_coding||c.-1729_-1710delCTTGTTAGTGAATAATGATG|||||1638|,A|intergenic_region|MODIFIER|OS01G0139700-OS01G0139900|OS01G0139700-OS01G0139900|intergenic_region|OS01G0139700-OS01G0139900|||n.2104310_2104329delCATCATTATTCACTAACAAG||||||
chr01	2105074	CCTCGCGCGCGTCCGCGGG	C	21746.2	0/0	0/0	1/1	0/0	0/0	1/1	1/1	1/1	0/0	1/1	1/1	1/1	1/1	0/0	0/0	1/1	0/0	0/0	0/0	1/1	0/0	0/0	0/0	0/0	C|intergenic_region|MODIFIER|OS01G0139700-OS01G0139900|OS01G0139700-OS01G0139900|intergenic_region|OS01G0139700-OS01G0139900|||n.2105075_2105092delCTCGCGCGCGTCCGCGGG||||||
chr01	2109843	TGCGGTTCACACAC	T	16587.5	0/0	0/0	1/1	0/0	0/0	1/1	1/1	1/1	0/0	1/1	0/0	1/1	1/1	0/0	0/0	0/0	0/0	0/0	0/0	1/1	0/0	0/0	0/0	0/0	T|upstream_gene_variant|MODIFIER|OS01G0139900|OS01G0139900|transcript|OS01T0139900-01|protein_coding||c.-221_-209delGTGTGTGAACCGC|||||167|,T|intergenic_region|MODIFIER|OS01G0139900-EPlOSAG00000002144|OS01G0139900-EPlOSAG00000002144|intergenic_region|OS01G0139900-EPlOSAG00000002144|||n.2109844_2109856delGCGGTTCACACAC||||||
chr01	2110410	G	GGGGACTCGAGT	6082.82	0/0	0/0	1/1	0/0	0/0	1/1	1|1	1|1	0/0	1|1	0/0	1/1	1|1	0/0	0/0	0/0	0/0	0/0	0/0	1/1	0/0	0/0	0/0	0/0	GGGGACTCGAGT|upstream_gene_variant|MODIFIER|OS01G0139900|OS01G0139900|transcript|OS01T0139900-01|protein_coding||c.-776_-775insACTCGAGTCCC|||||734|,GGGGACTCGAGT|intergenic_region|MODIFIER|OS01G0139900-EPlOSAG00000002144|OS01G0139900-EPlOSAG00000002144|intergenic_region|OS01G0139900-EPlOSAG00000002144|||n.2110410_2110411insGGGACTCGAGT||||||
chr01	2110439	A	AC	2282.4	0/0	0/0	1/1	0/0	0/0	./.	1/1	1/1	0/0	1/1	0/0	1/1	1/1	0/0	0/0	0/0	0/0	0/0	0/0	1/1	0/0	0/0	0/0	0/0	AC|upstream_gene_variant|MODIFIER|OS01G0139900|OS01G0139900|transcript|OS01T0139900-01|protein_coding||c.-805_-804insG|||||763|,AC|intergenic_region|MODIFIER|OS01G0139900-EPlOSAG00000002144|OS01G0139900-EPlOSAG00000002144|intergenic_region|OS01G0139900-EPlOSAG00000002144|||n.2110439_2110440insC||||||
chr01	2112179	CTGCAGCAA	C,*	828.75	0/0	0/0	2|2	0/0	0/0	./.	2|2	./.	0/0	./.	0/0	1|1	.	0/0	0/0	0/0	0/0	0/0	0/0	./.	0/0	0/0	0/0	0/0	C|upstream_gene_variant|MODIFIER|EPlOSAG00000002144|EPlOSAG00000002144|transcript|EPlOSAT00000003532|lincRNA||n.-335_-328delTGCAGCAA|||||335|,C|intergenic_region|MODIFIER|OS01G0139900-EPlOSAG00000002144|OS01G0139900-EPlOSAG00000002144|intergenic_region|OS01G0139900-EPlOSAG00000002144|||n.2112180_2112187delTGCAGCAA||||||
chr01	2112614	GT	G	3974.89	0/0	0/0	1/1	0/0	0/0	1/1	1|1	1/1	0/0	1/1	0/0	1|1	1/1	0/0	0/0	0/0	0/0	0/0	0/0	1/1	0/0	0/0	0/0	0/0	G|downstream_gene_variant|MODIFIER|EPlOSAG00000002144|EPlOSAG00000002144|transcript|EPlOSAT00000003532|lincRNA||n.*26delT|||||26|,G|intergenic_region|MODIFIER|EPlOSAG00000002144-OS01G0140100|EPlOSAG00000002144-OS01G0140100|intergenic_region|EPlOSAG00000002144-OS01G0140100|||n.2112615delT||||||
chr01	2112638	T	TTTTAACTTGGA	6540.98	0/0	0/0	1|1	0/0	0/0	1|1	1|1	1|1	0/0	1|1	0/0	1|1	1|1	0/0	0/0	0/0	0/0	0/0	0/0	1|1	0/0	0/0	0/0	0/0	TTTTAACTTGGA|downstream_gene_variant|MODIFIER|EPlOSAG00000002144|EPlOSAG00000002144|transcript|EPlOSAT00000003532|lincRNA||n.*49_*50insTTTAACTTGGA|||||50|,TTTTAACTTGGA|intergenic_region|MODIFIER|EPlOSAG00000002144-OS01G0140100|EPlOSAG00000002144-OS01G0140100|intergenic_region|EPlOSAG00000002144-OS01G0140100|||n.2112638_2112639insTTTAACTTGGA||||||
chr01	2112669	C	CTAAGATG	8205.98	0/0	0/0	1/1	0/0	0/0	1/1	1/1	1/1	0/0	1/1	0/0	1/1	1/1	0/0	0/0	0/0	0/0	0/0	0/0	1/1	0/0	0/0	0/0	0/0	CTAAGATG|downstream_gene_variant|MODIFIER|EPlOSAG00000002144|EPlOSAG00000002144|transcript|EPlOSAT00000003532|lincRNA||n.*80_*81insTAAGATG|||||81|,CTAAGATG|intergenic_region|MODIFIER|EPlOSAG00000002144-OS01G0140100|EPlOSAG00000002144-OS01G0140100|intergenic_region|EPlOSAG00000002144-OS01G0140100|||n.2112669_2112670insTAAGATG||||||
chr01	2113207	TA	T	18652.9	0/0	0/0	1|1	0/0	0/0	1|1	1|1	1|1	0/0	1|1	0/0	1|1	1|1	0/0	0/0	0/0	0/0	0/0	0/0	1|1	0/0	0/0	0/0	0/0	T|downstream_gene_variant|MODIFIER|EPlOSAG00000002144|EPlOSAG00000002144|transcript|EPlOSAT00000003532|lincRNA||n.*619delA|||||619|,T|intergenic_region|MODIFIER|EPlOSAG00000002144-OS01G0140100|EPlOSAG00000002144-OS01G0140100|intergenic_region|EPlOSAG00000002144-OS01G0140100|||n.2113208delA||||||
chr01	2113481	TGATC	T	15401.9	0/0	0/0	1/1	0/0	0/0	1/1	1/1	1/1	0/0	1/1	0/0	1/1	1/1	0/0	0/0	0/0	0/0	0/0	0/0	1/1	0/0	0/0	0/0	0/0	T|downstream_gene_variant|MODIFIER|EPlOSAG00000002144|EPlOSAG00000002144|transcript|EPlOSAT00000003532|lincRNA||n.*893_*896delGATC|||||893|,T|intergenic_region|MODIFIER|EPlOSAG00000002144-OS01G0140100|EPlOSAG00000002144-OS01G0140100|intergenic_region|EPlOSAG00000002144-OS01G0140100|||n.2113482_2113485delGATC||||||
chr01	2113576	C	CA	7254.82	0/0	0/0	1/1	0/0	0/0	1/1	1/1	1/1	0/0	1/1	0/0	1/1	1/1	0/0	0/0	0/0	0/0	0/0	0/0	1/1	0/0	0/0	0/0	0/0	CA|downstream_gene_variant|MODIFIER|EPlOSAG00000002144|EPlOSAG00000002144|transcript|EPlOSAT00000003532|lincRNA||n.*987_*988insA|||||988|,CA|intergenic_region|MODIFIER|EPlOSAG00000002144-OS01G0140100|EPlOSAG00000002144-OS01G0140100|intergenic_region|EPlOSAG00000002144-OS01G0140100|||n.2113576_2113577insA||||||
chr01	2116660	C	CTA	14558	0/0	0/0	1|1	0/0	0/0	1|1	1|1	1|1	0/0	1|1	0/0	1|1	1|1	0/0	0/0	0/0	0/0	0/0	0/0	1|1	0/0	0/0	0/0	0/0	CTA|intergenic_region|MODIFIER|EPlOSAG00000002144-OS01G0140100|EPlOSAG00000002144-OS01G0140100|intergenic_region|EPlOSAG00000002144-OS01G0140100|||n.2116660_2116661insTA||||||
chr01	2117147	T	TG	15223	0/0	0/0	1/1	0/0	0/0	1/1	1/1	1/1	0/0	1/1	0/0	1/1	1/1	0/0	0/0	0/0	0/0	0/0	0/0	1/1	0/0	0/0	0/0	0/0	TG|intergenic_region|MODIFIER|EPlOSAG00000002144-OS01G0140100|EPlOSAG00000002144-OS01G0140100|intergenic_region|EPlOSAG00000002144-OS01G0140100|||n.2117147_2117148insG||||||
chr01	2117418	GT	G	18440.9	0/0	0/0	1|1	0/0	0/0	1|1	1|1	1|1	0/0	1|1	0/0	1|1	1|1	0/0	0/0	0/0	0/0	0/0	0/0	1|1	0/0	0/0	0/0	0/0	G|intergenic_region|MODIFIER|EPlOSAG00000002144-OS01G0140100|EPlOSAG00000002144-OS01G0140100|intergenic_region|EPlOSAG00000002144-OS01G0140100|||n.2117419delT||||||
chr01	2119347	A	AT	9518.98	0/0	0/0	1/1	0/0	0/0	1/1	1/1	1/1	0/0	1/1	0/0	1/1	1/1	0/0	0/0	0/0	0/0	0/0	0/0	1/1	0/0	0/0	0/0	0/0	AT|upstream_gene_variant|MODIFIER|OS01G0140100|OS01G0140100|transcript|OS01T0140100-01|protein_coding||c.-1172_-1171insT|||||1141|,AT|intergenic_region|MODIFIER|EPlOSAG00000002144-OS01G0140100|EPlOSAG00000002144-OS01G0140100|intergenic_region|EPlOSAG00000002144-OS01G0140100|||n.2119347_2119348insT||||||
chr01	2124854	CT	C	9692.58	0/0	0/0	1/1	./.	0/0	1/1	1/1	1/1	0/0	1/1	0/0	1/1	1/1	0/0	0/0	./.	0/0	0/0	0/0	1/1	0/0	0/0	0/0	0/0	C|upstream_gene_variant|MODIFIER|EPlOSAG00000032451|EPlOSAG00000032451|transcript|EPlOSAT00000033839|lincRNA||n.-517delA|||||517|,C|upstream_gene_variant|MODIFIER|EPlOSAG00000044529|EPlOSAG00000044529|transcript|EPlOSAT00000045917|lincRNA||n.-522delA|||||522|,C|downstream_gene_variant|MODIFIER|EPlOSAG00000032747|EPlOSAG00000032747|transcript|EPlOSAT00000034135|lincRNA||n.*517delT|||||517|,C|inter…
chr01	2129847	ACCCTACGGG	A	13315.9	0/0	0/0	0/0	0/0	0/0	1/1	1/1	0/0	0/0	1/1	0/0	1/1	0/0	0/0	0/0	0/0	0/0	0/0	0/0	1/1	0/0	0/0	0/0	0/0	A|upstream_gene_variant|MODIFIER|OS01G0140400|OS01G0140400|transcript|OS01T0140400-02|protein_coding||c.-1639_-1631delCCCTACGGG|||||1585|,A|upstream_gene_variant|MODIFIER|OS01G0140400|OS01G0140400|transcript|OS01T0140400-01|protein_coding||c.-1639_-1631delCCCTACGGG|||||1165|,A|downstream_gene_variant|MODIFIER|EPlOSAG00000049058|EPlOSAG00000049058|transcript|EPlOSAT00000050446|lincRNA||n.*194_*202…
chr01	2145244	T	TA	11483	0/0	0/0	1/1	0/0	0/0	1/1	1/1	1/1	0/0	1/1	0/0	1/1	1/1	0/0	0/0	0/0	0/0	0/0	0/0	1/1	0/0	0/0	0/0	0/0	TA|intergenic_region|MODIFIER|EPlOSAG00000030173-OS01G0140700|EPlOSAG00000030173-OS01G0140700|intergenic_region|EPlOSAG00000030173-OS01G0140700|||n.2145244_2145245insA||||||
chr01	2146344	G	GT	10857	0/0	0/0	1/1	0/0	0/0	1/1	1/1	1/1	0/0	1/1	0/0	1/1	1/1	0/0	0/0	0/0	0/0	0/0	0/0	1/1	0/0	0/0	0/0	0/0	GT|intergenic_region|MODIFIER|EPlOSAG00000030173-OS01G0140700|EPlOSAG00000030173-OS01G0140700|intergenic_region|EPlOSAG00000030173-OS01G0140700|||n.2146344_2146345insT||||||
chr01	2146717	CGGT	C	17326.9	0/0	0/0	1/1	0/0	0/0	1/1	1/1	1/1	0/0	1/1	0/0	1/1	1/1	0/0	0/0	0/0	0/0	0/0	0/0	1/1	0/0	0/0	0/0	0/0	C|intergenic_region|MODIFIER|EPlOSAG00000030173-OS01G0140700|EPlOSAG00000030173-OS01G0140700|intergenic_region|EPlOSAG00000030173-OS01G0140700|||n.2146718_2146720delGGT||||||
chr01	2147014	C	CAAAA,CAAA	15817.1	0/0	0/0	1/1	0/0	0/0	2/2	2|2	1|1	0/0	2|2	0/0	2/2	1|1	0/0	0/0	0/0	0/0	0/0	0/0	2/2	0/0	0/0	0/0	0/0	CAAA|intergenic_region|MODIFIER|EPlOSAG00000030173-OS01G0140700|EPlOSAG00000030173-OS01G0140700|intergenic_region|EPlOSAG00000030173-OS01G0140700|||n.2147014_2147015insAAA||||||,CAAAA|intergenic_region|MODIFIER|EPlOSAG00000030173-OS01G0140700|EPlOSAG00000030173-OS01G0140700|intergenic_region|EPlOSAG00000030173-OS01G0140700|||n.2147014_2147015insAAAA||||||
chr01	2149302	ATCGGTCT	A	12847.9	0/0	0/0	1/1	0/0	0/0	1/1	1/1	1/1	0/0	1/1	0/0	1/1	1/1	0/0	0/0	0/0	0/0	0/0	0/0	1/1	0/0	0/0	0/0	0/0	A|intergenic_region|MODIFIER|EPlOSAG00000030173-OS01G0140700|EPlOSAG00000030173-OS01G0140700|intergenic_region|EPlOSAG00000030173-OS01G0140700|||n.2149303_2149309delTCGGTCT||||||
chr01	2149383	TTCGGTC	T	12338.9	0/0	0/0	1/1	0/0	0/0	1/1	1/1	1/1	0/0	1/1	0/0	1/1	1/1	0/0	0/0	0/0	0/0	0/0	0/0	1/1	0/0	0/0	0/0	0/0	T|intergenic_region|MODIFIER|EPlOSAG00000030173-OS01G0140700|EPlOSAG00000030173-OS01G0140700|intergenic_region|EPlOSAG00000030173-OS01G0140700|||n.2149384_2149389delTCGGTC||||||
chr01	2151124	GC	G	11351.9	0/0	0/0	1/1	0/0	0/0	1/1	1/1	1/1	0/0	1/1	0/0	1/1	1/1	0/0	0/0	0/0	0/0	0/0	0/0	1/1	0/0	0/0	0/0	0/0	G|intergenic_region|MODIFIER|EPlOSAG00000030173-OS01G0140700|EPlOSAG00000030173-OS01G0140700|intergenic_region|EPlOSAG00000030173-OS01G0140700|||n.2151125delC||||||
chr01	2151904	G	GA	10960	0/0	0/0	1/1	0/0	0/0	1/1	1/1	1/1	0/0	1/1	0/0	1/1	1/1	0/0	0/0	0/0	0/0	0/0	0/0	1/1	0/0	0/0	0/0	0/0	GA|intergenic_region|MODIFIER|EPlOSAG00000030173-OS01G0140700|EPlOSAG00000030173-OS01G0140700|intergenic_region|EPlOSAG00000030173-OS01G0140700|||n.2151904_2151905insA||||||
chr01	2153779	C	CA	12052	0/0	0/0	1/1	0/0	0/0	1/1	1/1	1/1	0/0	1/1	0/0	1/1	1/1	0/0	0/0	0/0	0/0	0/0	0/0	1/1	0/0	0/0	0/0	0/0	CA|upstream_gene_variant|MODIFIER|OS01G0140700|OS01G0140700|transcript|OS01T0140700-00|protein_coding||c.-547_-546insA|||||546|,CA|intergenic_region|MODIFIER|EPlOSAG00000030173-OS01G0140700|EPlOSAG00000030173-OS01G0140700|intergenic_region|EPlOSAG00000030173-OS01G0140700|||n.2153779_2153780insA||||||
chr01	2153903	TACACATCAAAACTAAATAATAGCATCGACCAAAATAGTCGATTACTAACAGAGATTCTCGTAGCC	T	8683.94	0/0	0/0	1/1	0/0	0/0	1/1	1/1	1/1	0/0	1/1	0/0	1/1	1/1	0/0	0/0	0/0	0/0	0/0	0/0	1/1	0/0	0/0	0/0	0/0	T|upstream_gene_variant|MODIFIER|OS01G0140700|OS01G0140700|transcript|OS01T0140700-00|protein_coding||c.-422_-358delACACATCAAAACTAAATAATAGCATCGACCAAAATAGTCGATTACTAACAGAGATTCTCGTAGCC|||||422|,T|intergenic_region|MODIFIER|EPlOSAG00000030173-OS01G0140700|EPlOSAG00000030173-OS01G0140700|intergenic_region|EPlOSAG00000030173-OS01G0140700|||n.2153904_2153968delACACATCAAAACTAAATAATAGCATCGACCAAAATAGTCGATT…
chr01	2154406	A	AGAG	15692	0/0	0/0	1/1	0/0	0/0	1/1	1/1	1/1	0/0	1/1	0/0	1/1	1/1	0/0	0/0	0/0	0/0	0/0	0/0	1/1	0/0	0/0	0/0	0/0	AGAG|conservative_inframe_insertion|MODERATE|OS01G0140700|OS01G0140700|transcript|OS01T0140700-00|protein_coding|1/1|c.100_102dupGAG|p.Glu34dup|103/954|103/954|35/317||INFO_REALIGN_3_PRIME
chr01	2155331	CCTTCTTCTTCTTCTTCTTCTTCTTCTTCTTCTTCTTCTT	C	12793	0/0	0/0	1/1	0/0	0/0	1/1	1/1	1/1	0/0	1/1	0/0	1/1	1/1	0/0	0/0	0/0	0/0	0/0	0/0	1/1	0/0	0/0	0/0	0/0	C|downstream_gene_variant|MODIFIER|OS01G0140700|OS01G0140700|transcript|OS01T0140700-00|protein_coding||c.*53_*91delCTTCTTCTTCTTCTTCTTCTTCTTCTTCTTCTTCTTCTT|||||53|,C|intergenic_region|MODIFIER|OS01G0140700-EPlOSAG00000025305|OS01G0140700-EPlOSAG00000025305|intergenic_region|OS01G0140700-EPlOSAG00000025305|||n.2155332_2155370delCTTCTTCTTCTTCTTCTTCTTCTTCTTCTTCTTCTTCTT||||||
chr01	2160630	G	GC	13192	0/0	0/0	1/1	0/0	0/0	1/1	1/1	1/1	0/0	1/1	0/0	1/1	1/1	0/0	0/0	0/0	0/0	0/0	0/0	1/1	0/0	0/0	0/0	0/0	GC|intergenic_region|MODIFIER|OS01G0140700-EPlOSAG00000025305|OS01G0140700-EPlOSAG00000025305|intergenic_region|OS01G0140700-EPlOSAG00000025305|||n.2160630_2160631insC||||||
chr01	2162987	GT	G	11919.9	0/0	0/0	1/1	0/0	0/0	1/1	1/1	1/1	0/0	1/1	0/0	1/1	1/1	0/0	0/0	0/0	0/0	0/0	0/0	1/1	0/0	0/0	0/0	0/0	G|intergenic_region|MODIFIER|OS01G0140700-EPlOSAG00000025305|OS01G0140700-EPlOSAG00000025305|intergenic_region|OS01G0140700-EPlOSAG00000025305|||n.2162988delT||||||
chr01	2167154	GA	G	4070.66	0/0	0/0	1/1	0/0	0/0	1/1	1/1	1/1	0/0	1/1	0/0	1/1	1/1	0/0	0/0	0/0	0/0	0/0	0/0	1/1	0/0	0/0	0/0	0/0	G|upstream_gene_variant|MODIFIER|EPlOSAG00000025305|EPlOSAG00000025305|transcript|EPlOSAT00000026693|lincRNA||n.-397delA|||||397|,G|intergenic_region|MODIFIER|OS01G0140700-EPlOSAG00000025305|OS01G0140700-EPlOSAG00000025305|intergenic_region|OS01G0140700-EPlOSAG00000025305|||n.2167155delA||||||
chr01	2167187	GT	G	2313.1	0/0	0/0	./.	0/0	0/0	1/1	1/1	1/1	0/0	1/1	0/0	1/1	1/1	0/0	0/0	0/0	0/0	0/0	0/0	1/1	0/0	0/0	0/0	0/0	G|upstream_gene_variant|MODIFIER|EPlOSAG00000025305|EPlOSAG00000025305|transcript|EPlOSAT00000026693|lincRNA||n.-364delT|||||364|,G|intergenic_region|MODIFIER|OS01G0140700-EPlOSAG00000025305|OS01G0140700-EPlOSAG00000025305|intergenic_region|OS01G0140700-EPlOSAG00000025305|||n.2167188delT||||||
chr01	2167301	GCATTCGTTC	G	13793.9	0/0	0/0	1/1	0/0	0/0	1/1	1/1	1/1	0/0	1/1	0/0	1/1	1/1	0/0	0/0	0/0	0/0	0/0	0/0	1/1	0/0	0/0	0/0	0/0	G|upstream_gene_variant|MODIFIER|EPlOSAG00000025305|EPlOSAG00000025305|transcript|EPlOSAT00000026693|lincRNA||n.-250_-242delCATTCGTTC|||||250|,G|intergenic_region|MODIFIER|OS01G0140700-EPlOSAG00000025305|OS01G0140700-EPlOSAG00000025305|intergenic_region|OS01G0140700-EPlOSAG00000025305|||n.2167302_2167310delCATTCGTTC||||||
chr01	2171083	T	TA	16433	0/0	0/0	1|1	0/0	0/0	1|1	1|1	1|1	0/0	1|1	0/0	1|1	1|1	0/0	0/0	0/0	0/0	0/0	0/0	1/1	0/0	0/0	0/0	0/0	TA|intergenic_region|MODIFIER|EPlOSAG00000025305-EPlOSAG00000023061|EPlOSAG00000025305-EPlOSAG00000023061|intergenic_region|EPlOSAG00000025305-EPlOSAG00000023061|||n.2171083_2171084insA||||||
chr01	2171433	TA	T	1192.1	0/0	0/0	0/0	0/0	0/0	0/0	0/0	0/0	0/0	0/0	0/0	0/0	0/0	0/0	0/0	0/0	0/0	0/0	0/0	0/0	1/1	0/0	0/0	0/0	T|intergenic_region|MODIFIER|EPlOSAG00000025305-EPlOSAG00000023061|EPlOSAG00000025305-EPlOSAG00000023061|intergenic_region|EPlOSAG00000025305-EPlOSAG00000023061|||n.2171434delA||||||
chr01	2173353	G	GA	11418	0/0	0/0	1/1	0/0	0/0	1/1	1/1	1/1	0/0	1/1	0/0	1/1	1/1	0/0	0/0	0/0	0/0	0/0	0/0	1/1	0/0	0/0	0/0	0/0	GA|intergenic_region|MODIFIER|EPlOSAG00000025305-EPlOSAG00000023061|EPlOSAG00000025305-EPlOSAG00000023061|intergenic_region|EPlOSAG00000025305-EPlOSAG00000023061|||n.2173353_2173354insA||||||
chr01	2173873	T	TG	5785.98	0/0	0/0	1/1	0/0	0/0	1/1	1/1	1/1	0/0	1/1	0/0	1/1	1/1	0/0	0/0	0/0	0/0	0/0	0/0	1/1	0/0	0/0	0/0	0/0	TG|intergenic_region|MODIFIER|EPlOSAG00000025305-EPlOSAG00000023061|EPlOSAG00000025305-EPlOSAG00000023061|intergenic_region|EPlOSAG00000025305-EPlOSAG00000023061|||n.2173873_2173874insG||||||
chr01	2173925	AC	A	2767.63	0/0	0/0	1|1	0/0	0/0	1|1	1|1	1|1	0/0	1|1	0/0	1|1	1|1	0/0	0/0	0/0	0/0	0/0	0/0	1|1	0/0	0/0	0/0	0/0	A|intergenic_region|MODIFIER|EPlOSAG00000025305-EPlOSAG00000023061|EPlOSAG00000025305-EPlOSAG00000023061|intergenic_region|EPlOSAG00000025305-EPlOSAG00000023061|||n.2173926delC||||||
chr01	2173987	TC	T	6673.94	0/0	0/0	1/1	0/0	0/0	1/1	1/1	1/1	0/0	1/1	0/0	1/1	1/1	0/0	0/0	0/0	0/0	0/0	0/0	1/1	0/0	0/0	0/0	0/0	T|intergenic_region|MODIFIER|EPlOSAG00000025305-EPlOSAG00000023061|EPlOSAG00000025305-EPlOSAG00000023061|intergenic_region|EPlOSAG00000025305-EPlOSAG00000023061|||n.2173988delC||||||
chr01	2174244	A	AG	6706.93	0/0	0/0	1/1	0/0	0/0	1/1	1/1	1/1	0/0	1/1	0/0	1/1	1/1	0/0	0/0	0/0	0/0	0/0	0/0	1/1	0/0	0/0	0/0	0/0	AG|intergenic_region|MODIFIER|EPlOSAG00000025305-EPlOSAG00000023061|EPlOSAG00000025305-EPlOSAG00000023061|intergenic_region|EPlOSAG00000025305-EPlOSAG00000023061|||n.2174244_2174245insG||||||
chr01	2174783	ATG	A	687.25	0/0	0/0	0/0	0/0	0/0	1|1	./.	./.	0/0	./.	0/0	1/1	0/0	0/0	0/0	0/0	0/0	0/0	0/0	0/0	0/0	0/0	0/0	0/0	A|intergenic_region|MODIFIER|EPlOSAG00000025305-EPlOSAG00000023061|EPlOSAG00000025305-EPlOSAG00000023061|intergenic_region|EPlOSAG00000025305-EPlOSAG00000023061|||n.2174784_2174785delTG||||||
chr01	2174809	ATG	A	684.34	0/0	0/0	0/0	0/0	0/0	1|1	./.	./.	0/0	0/0	0/0	1/1	./.	0/0	0/0	0/0	0/0	0/0	0/0	0/0	0/0	0/0	0/0	0/0	A|intergenic_region|MODIFIER|EPlOSAG00000025305-EPlOSAG00000023061|EPlOSAG00000025305-EPlOSAG00000023061|intergenic_region|EPlOSAG00000025305-EPlOSAG00000023061|||n.2174810_2174811delTG||||||
chr01	2174816	TATATATATATATATTA	T	850.14	0/0	0/0	0/0	0/0	0/0	1|1	0/0	./.	0/0	0/0	0/0	1/1	0/0	0/0	0/0	0/0	0/0	0/0	0/0	./.	0/0	0/0	0/0	0/0	T|intergenic_region|MODIFIER|EPlOSAG00000025305-EPlOSAG00000023061|EPlOSAG00000025305-EPlOSAG00000023061|intergenic_region|EPlOSAG00000025305-EPlOSAG00000023061|||n.2174817_2174832delATATATATATATATTA||||||
chr01	2174851	TG	T	862.96	0/0	0/0	./.	0/0	0/0	1|1	./.	0/0	0/0	./.	0/0	1/1	./.	0/0	0/0	0/0	0/0	0/0	0/0	./.	0/0	0/0	0/0	0/0	T|intergenic_region|MODIFIER|EPlOSAG00000025305-EPlOSAG00000023061|EPlOSAG00000025305-EPlOSAG00000023061|intergenic_region|EPlOSAG00000025305-EPlOSAG00000023061|||n.2174852delG||||||
chr01	2175085	G	GCTC	11070.1	0/0	0/0	1/1	0/0	0/0	1/1	1/1	1/1	0/0	1/1	0/0	1/1	1/1	0/0	0/0	0/0	0/0	0/0	0/0	1/1	0/0	0/0	0/0	0/0	GCTC|intergenic_region|MODIFIER|EPlOSAG00000025305-EPlOSAG00000023061|EPlOSAG00000025305-EPlOSAG00000023061|intergenic_region|EPlOSAG00000025305-EPlOSAG00000023061|||n.2175085_2175086insCTC||||||
chr01	2175624	T	TA	10902	0/0	0/0	1/1	0/0	0/0	1/1	1/1	1/1	0/0	1/1	0/0	1/1	1/1	0/0	0/0	0/0	0/0	0/0	0/0	1/1	0/0	0/0	0/0	0/0	TA|intergenic_region|MODIFIER|EPlOSAG00000025305-EPlOSAG00000023061|EPlOSAG00000025305-EPlOSAG00000023061|intergenic_region|EPlOSAG00000025305-EPlOSAG00000023061|||n.2175624_2175625insA||||||
chr01	2177689	TATTATATAA	T	11471.4	0/0	0/0	1|1	0/0	0/0	1|1	1|1	1|1	0/0	1|1	0/0	0/0	1|1	0/0	0/0	0/0	0/0	0/0	0/0	1|1	0/0	0/0	0/0	0/0	T|intergenic_region|MODIFIER|EPlOSAG00000025305-EPlOSAG00000023061|EPlOSAG00000025305-EPlOSAG00000023061|intergenic_region|EPlOSAG00000025305-EPlOSAG00000023061|||n.2177690_2177698delATTATATAA||||||
chr01	2177781	AGAGAGAGAGAGAGAGAGAGAGAGC	A	10609.5	0/0	0/0	1|1	0/0	0/0	1|1	1|1	1|1	0/0	1|1	0/0	0/0	1|1	0/0	0/0	0/0	0/0	0/0	0/0	1|1	0/0	0/0	0/0	0/0	A|intergenic_region|MODIFIER|EPlOSAG00000025305-EPlOSAG00000023061|EPlOSAG00000025305-EPlOSAG00000023061|intergenic_region|EPlOSAG00000025305-EPlOSAG00000023061|||n.2177782_2177805delGAGAGAGAGAGAGAGAGAGAGAGC||||||
chr01	2179999	G	GGTAATCAACGTTGA	309.89	0/0	0/0	0/0	0/0	0/0	./.	./.	1/1	0/0	./.	0/0	./.	./.	0/0	0/0	0/0	0/0	0/0	0/0	./.	0/0	0/0	0/0	0/0	GGTAATCAACGTTGA|downstream_gene_variant|MODIFIER|EPlOSAG00000023061|EPlOSAG00000023061|transcript|EPlOSAT00000024449|lincRNA||n.*1879_*1880insTCAACGTTGATTAC|||||1879|,GGTAATCAACGTTGA|intergenic_region|MODIFIER|EPlOSAG00000025305-EPlOSAG00000023061|EPlOSAG00000025305-EPlOSAG00000023061|intergenic_region|EPlOSAG00000025305-EPlOSAG00000023061|||n.2179999_2180000insGTAATCAACGTTGA||||||
chr01	2201741	G	GA	9887.98	0/0	0/0	1/1	0/0	0/0	1/1	1/1	1/1	0/0	1/1	0/0	1/1	1/1	0/0	0/0	0/0	0/0	0/0	0/0	1/1	0/0	0/0	0/0	0/0	GA|upstream_gene_variant|MODIFIER|OS01G0141000|OS01G0141000|transcript|OS01T0141000-01|protein_coding||c.-663_-662insA|||||536|,GA|intergenic_region|MODIFIER|EPlOSAG00000024109-OS01G0141000|EPlOSAG00000024109-OS01G0141000|intergenic_region|EPlOSAG00000024109-OS01G0141000|||n.2201741_2201742insA||||||
chr01	2204048	C	CGA	233.5	0/0	0/0	0/0	0/0	0/0	0/0	./.	1|1	0/0	0/0	0/0	0/0	0/0	0/0	0/0	0/0	0/0	0/0	0/0	0/0	0/0	0/0	0/0	0/0	CGA|downstream_gene_variant|MODIFIER|OS01G0141000|OS01G0141000|transcript|OS01T0141000-01|protein_coding||c.*547_*548insGA|||||262|,CGA|intergenic_region|MODIFIER|OS01G0141000-EPlOSAG00000035801|OS01G0141000-EPlOSAG00000035801|intergenic_region|OS01G0141000-EPlOSAG00000035801|||n.2204048_2204049insGA||||||
chr01	2205708	C	CTATA	16074	0/0	0/0	1/1	0/0	0/0	1/1	1/1	1/1	0/0	1/1	0/0	1/1	1/1	0/0	0/0	0/0	0/0	0/0	0/0	1/1	0/0	0/0	0/0	0/0	CTATA|downstream_gene_variant|MODIFIER|OS01G0141000|OS01G0141000|transcript|OS01T0141000-01|protein_coding||c.*2207_*2208insTATA|||||1922|,CTATA|intergenic_region|MODIFIER|OS01G0141000-EPlOSAG00000035801|OS01G0141000-EPlOSAG00000035801|intergenic_region|OS01G0141000-EPlOSAG00000035801|||n.2205708_2205709insTATA||||||
chr01	2207396	C	CAAGCATTTGTCTAGAT	19132	0/0	0/0	1/1	0/0	0/0	1/1	1/1	1/1	0/0	1/1	0/0	1/1	1/1	0/0	0/0	0/0	0/0	0/0	0/0	1/1	0/0	0/0	0/0	0/0	CAAGCATTTGTCTAGAT|upstream_gene_variant|MODIFIER|EPlOSAG00000035801|EPlOSAG00000035801|transcript|EPlOSAT00000037189|lincRNA||n.-1585_-1584insAAGCATTTGTCTAGAT|||||1584|,CAAGCATTTGTCTAGAT|upstream_gene_variant|MODIFIER|EPlOSAG00000000815|EPlOSAG00000000815|transcript|EPlOSAT00000002203|lincRNA||n.-1607_-1606insAAGCATTTGTCTAGAT|||||1606|,CAAGCATTTGTCTAGAT|downstream_gene_variant|MODIFIER|EPlOSAG000…
chr01	2207673	A	AT	5320.94	0/0	0/0	1/1	0/0	0/0	1/1	1/1	1/1	0/0	1/1	0/0	1/1	1/1	0/0	0/0	0/0	0/0	0/0	0/0	1/1	0/0	0/0	0/0	0/0	AT|upstream_gene_variant|MODIFIER|EPlOSAG00000035801|EPlOSAG00000035801|transcript|EPlOSAT00000037189|lincRNA||n.-1308_-1307insT|||||1307|,AT|upstream_gene_variant|MODIFIER|EPlOSAG00000000815|EPlOSAG00000000815|transcript|EPlOSAT00000002203|lincRNA||n.-1330_-1329insT|||||1329|,AT|downstream_gene_variant|MODIFIER|EPlOSAG00000036022|EPlOSAG00000036022|transcript|EPlOSAT00000037410|lincRNA||n.*1307_…
chr01	2207752	T	TAA	12455	0/0	0/0	1/1	0/0	0/0	1/1	1/1	1/1	0/0	1/1	0/0	1/1	1/1	0/0	0/0	0/0	0/0	0/0	0/0	1/1	0/0	0/0	0/0	0/0	TAA|upstream_gene_variant|MODIFIER|EPlOSAG00000035801|EPlOSAG00000035801|transcript|EPlOSAT00000037189|lincRNA||n.-1229_-1228insAA|||||1228|,TAA|upstream_gene_variant|MODIFIER|EPlOSAG00000000815|EPlOSAG00000000815|transcript|EPlOSAT00000002203|lincRNA||n.-1251_-1250insAA|||||1250|,TAA|downstream_gene_variant|MODIFIER|EPlOSAG00000036022|EPlOSAG00000036022|transcript|EPlOSAT00000037410|lincRNA||n.*…
chr01	2207954	C	CTGTTAGAAACAGAGGAGAATCCCACAGTAAGTTTTTCTT	14087	0/0	0/0	1/1	0/0	0/0	1/1	1/1	1/1	0/0	1/1	0/0	1/1	1/1	0/0	0/0	0/0	0/0	0/0	0/0	1/1	0/0	0/0	0/0	0/0	CTGTTAGAAACAGAGGAGAATCCCACAGTAAGTTTTTCTT|upstream_gene_variant|MODIFIER|EPlOSAG00000035801|EPlOSAG00000035801|transcript|EPlOSAT00000037189|lincRNA||n.-1027_-1026insTGTTAGAAACAGAGGAGAATCCCACAGTAAGTTTTTCTT|||||1026|,CTGTTAGAAACAGAGGAGAATCCCACAGTAAGTTTTTCTT|upstream_gene_variant|MODIFIER|EPlOSAG00000000815|EPlOSAG00000000815|transcript|EPlOSAT00000002203|lincRNA||n.-1049_-1048insTGTTAGAAACAGAGGAGAA…
chr01	2208924	GTATA	G	3042.55	0/0	0/0	1/1	0/0	0/0	1/1	1/1	1/1	0/0	1/1	0/0	1/1	1/1	0/0	0/0	0/0	0/0	0/0	0/0	1/1	0/0	0/0	0/0	0/0	G|upstream_gene_variant|MODIFIER|EPlOSAG00000035801|EPlOSAG00000035801|transcript|EPlOSAT00000037189|lincRNA||n.-56_-53delTATA|||||56|,G|upstream_gene_variant|MODIFIER|EPlOSAG00000000815|EPlOSAG00000000815|transcript|EPlOSAT00000002203|lincRNA||n.-78_-75delTATA|||||78|,G|downstream_gene_variant|MODIFIER|EPlOSAG00000036022|EPlOSAG00000036022|transcript|EPlOSAT00000037410|lincRNA||n.*53_*56delTATA|…
chr01	2212303	T	TTG	13659	0/0	0/0	1/1	0/0	0/0	1/1	1/1	1/1	0/0	1/1	0/0	1/1	1/1	0/0	0/0	0/0	0/0	0/0	0/0	1/1	0/0	0/0	0/0	0/0	TTG|intergenic_region|MODIFIER|EPlOSAG00000035801-OS01G0141100|EPlOSAG00000035801-OS01G0141100|intergenic_region|EPlOSAG00000035801-OS01G0141100|||n.2212303_2212304insTG||||||
chr01	2214245	TCATGAGACA	T	15324.9	0/0	0/0	1/1	0/0	0/0	1/1	1/1	1/1	0/0	1/1	0/0	1/1	1/1	0/0	0/0	0/0	0/0	0/0	0/0	1/1	0/0	0/0	0/0	0/0	T|upstream_gene_variant|MODIFIER|OS01G0141150|OS01G0141150|transcript|OS01T0141150-00|protein_coding||c.-7007_-6999delCATGAGACA|||||1884|WARNING_TRANSCRIPT_INCOMPLETE,T|downstream_gene_variant|MODIFIER|OS01G0141100|OS01G0141100|transcript|OS01T0141100-02|protein_coding||c.*1669_*1677delTGTCTCATG|||||1430|WARNING_TRANSCRIPT_NO_START_CODON,T|downstream_gene_variant|MODIFIER|OS01G0141100|OS01G014110…
chr01	2214746	ATC	A	3141.74	0/0	0/0	1/1	0/0	0/0	1/1	1/1	1/1	0/0	1/1	0/0	1/1	1/1	0/0	0/0	0/0	0/0	0/0	0/0	1/1	0/0	0/0	0/0	0/0	A|upstream_gene_variant|MODIFIER|OS01G0141150|OS01G0141150|transcript|OS01T0141150-00|protein_coding||c.-6506_-6505delTC|||||1383|WARNING_TRANSCRIPT_INCOMPLETE,A|downstream_gene_variant|MODIFIER|OS01G0141100|OS01G0141100|transcript|OS01T0141100-02|protein_coding||c.*1175_*1176delGA|||||929|WARNING_TRANSCRIPT_NO_START_CODON,A|downstream_gene_variant|MODIFIER|EPlOSAG00000020478|EPlOSAG00000020478|t…
chr01	2214777	AAG	A	143.04	0/0	0/0	./.	0/0	0/0	./.	./.	1/1	0/0	./.	0/0	./.	./.	0/0	0/0	0/0	0/0	0/0	0/0	./.	0/0	0/0	0/0	0/0	A|upstream_gene_variant|MODIFIER|OS01G0141150|OS01G0141150|transcript|OS01T0141150-00|protein_coding||c.-6475_-6474delAG|||||1352|WARNING_TRANSCRIPT_INCOMPLETE,A|downstream_gene_variant|MODIFIER|OS01G0141100|OS01G0141100|transcript|OS01T0141100-02|protein_coding||c.*1144_*1145delCT|||||898|WARNING_TRANSCRIPT_NO_START_CODON,A|downstream_gene_variant|MODIFIER|EPlOSAG00000020478|EPlOSAG00000020478|t…
chr01	2215118	G	GCC	15455	0/0	0/0	1|1	0/0	0/0	1|1	1|1	1|1	0/0	1|1	0/0	1|1	1|1	0/0	0/0	0/0	0/0	0/0	0/0	1|1	0/0	0/0	0/0	0/0	GCC|upstream_gene_variant|MODIFIER|OS01G0141150|OS01G0141150|transcript|OS01T0141150-00|protein_coding||c.-6135_-6134insCC|||||1011|WARNING_TRANSCRIPT_INCOMPLETE,GCC|downstream_gene_variant|MODIFIER|OS01G0141100|OS01G0141100|transcript|OS01T0141100-02|protein_coding||c.*804_*805insGG|||||557|WARNING_TRANSCRIPT_NO_START_CODON,GCC|downstream_gene_variant|MODIFIER|EPlOSAG00000020478|EPlOSAG000000204…
chr01	2215120	T	TGCAGGTAGG	16333	0/0	0/0	1|1	0/0	0/0	1|1	1|1	1|1	0/0	1|1	0/0	1|1	1|1	0/0	0/0	0/0	0/0	0/0	0/0	1|1	0/0	0/0	0/0	0/0	TGCAGGTAGG|upstream_gene_variant|MODIFIER|OS01G0141150|OS01G0141150|transcript|OS01T0141150-00|protein_coding||c.-6133_-6132insGCAGGTAGG|||||1009|WARNING_TRANSCRIPT_INCOMPLETE,TGCAGGTAGG|downstream_gene_variant|MODIFIER|OS01G0141100|OS01G0141100|transcript|OS01T0141100-02|protein_coding||c.*802_*803insCCTACCTGC|||||555|WARNING_TRANSCRIPT_NO_START_CODON,TGCAGGTAGG|downstream_gene_variant|MODIFIER|…
chr01	2215266	CA	C	10819.9	0/0	0/0	1/1	0/0	0/0	1/1	1/1	1/1	0/0	1/1	0/0	1/1	1/1	0/0	0/0	0/0	0/0	0/0	0/0	1/1	0/0	0/0	0/0	0/0	C|upstream_gene_variant|MODIFIER|OS01G0141150|OS01G0141150|transcript|OS01T0141150-00|protein_coding||c.-5986delA|||||863|WARNING_TRANSCRIPT_INCOMPLETE,C|downstream_gene_variant|MODIFIER|OS01G0141100|OS01G0141100|transcript|OS01T0141100-02|protein_coding||c.*656delT|||||409|WARNING_TRANSCRIPT_NO_START_CODON,C|downstream_gene_variant|MODIFIER|EPlOSAG00000020478|EPlOSAG00000020478|transcript|EPlOSA…
chr01	2216523	C	CA	14084	0/0	0/0	1/1	0/0	0/0	1/1	1/1	1/1	0/0	1/1	0/0	1/1	1/1	0/0	0/0	0/0	0/0	0/0	0/0	1/1	0/0	0/0	0/0	0/0	CA|downstream_gene_variant|MODIFIER|EPlOSAG00000020478|EPlOSAG00000020478|transcript|EPlOSAT00000021866|lincRNA||n.*120_*121insT|||||120|,CA|intron_variant|MODIFIER|OS01G0141100|OS01G0141100|transcript|OS01T0141100-02|protein_coding|5/7|c.531+33_531+34insT||||||WARNING_TRANSCRIPT_NO_START_CODON,CA|intron_variant|MODIFIER|OS01G0141150|OS01G0141150|transcript|OS01T0141150-00|protein_coding|2/6|c.-4…
chr01	2218528	C	CA	7999.98	0/0	0/0	1/1	0/0	0/0	1/1	1/1	1/1	0/0	1/1	0/0	1/1	1/1	0/0	0/0	0/0	0/0	0/0	0/0	1/1	0/0	0/0	0/0	0/0	CA|upstream_gene_variant|MODIFIER|EPlOSAG00000020478|EPlOSAG00000020478|transcript|EPlOSAT00000021866|lincRNA||n.-1812_-1811insT|||||1812|,CA|intron_variant|MODIFIER|OS01G0141100|OS01G0141100|transcript|OS01T0141100-02|protein_coding|2/7|c.189-816_189-815insT||||||WARNING_TRANSCRIPT_NO_START_CODON,CA|intron_variant|MODIFIER|OS01G0141150|OS01G0141150|transcript|OS01T0141150-00|protein_coding|5/6|c…
chr01	2218587	T	TTTTAGTTGCTTTAGTAAATCATATTAATCCATTTTTCAAG	3584.21	0/0	0/0	1/1	0/0	0/0	1/1	1/1	0/0	0/0	1/1	0/0	1/1	1/1	0/0	0/0	0/0	0/0	0/0	0/0	1/1	0/0	0/0	0/0	0/0	TTTTAGTTGCTTTAGTAAATCATATTAATCCATTTTTCAAG|upstream_gene_variant|MODIFIER|EPlOSAG00000020478|EPlOSAG00000020478|transcript|EPlOSAT00000021866|lincRNA||n.-1871_-1870insCTTGAAAAATGGATTAATATGATTTACTAAAGCAACTAAA|||||1871|,TTTTAGTTGCTTTAGTAAATCATATTAATCCATTTTTCAAG|intron_variant|MODIFIER|OS01G0141100|OS01G0141100|transcript|OS01T0141100-02|protein_coding|2/7|c.189-875_189-874insCTTGAAAAATGGATTAATATGATT…
chr01	2219045	A	ATATTTCAGTGATGAC	18776	0/0	0/0	1/1	0/0	0/0	1/1	1/1	1/1	0/0	1/1	0/0	1/1	1/1	0/0	0/0	0/0	0/0	0/0	0/0	1/1	0/0	0/0	0/0	0/0	ATATTTCAGTGATGAC|intron_variant|MODIFIER|OS01G0141100|OS01G0141100|transcript|OS01T0141100-02|protein_coding|2/7|c.189-1333_189-1332insGTCATCACTGAAATA||||||WARNING_TRANSCRIPT_NO_START_CODON,ATATTTCAGTGATGAC|intron_variant|MODIFIER|OS01G0141150|OS01G0141150|transcript|OS01T0141150-00|protein_coding|5/6|c.-116+1348_-116+1349insTATTTCAGTGATGAC||||||WARNING_TRANSCRIPT_INCOMPLETE,ATATTTCAGTGATGAC|intr…
chr01	2222672	CCCG	C	8530.88	0/0	0/0	1|1	0/0	0/0	1/1	1|1	1|1	0/0	1|1	0/0	1|1	1|1	0/0	0/0	0/0	0/0	0/0	0/0	1|1	0/0	0/0	0/0	0/0	C|5_prime_UTR_variant|MODIFIER|OS01G0141100|OS01G0141100|transcript|OS01T0141100-01|protein_coding|1/8|c.-87_-85delCGG|||||85|,C|upstream_gene_variant|MODIFIER|OS01G0141100|OS01G0141100|transcript|OS01T0141100-02|protein_coding||c.-477_-475delCGG|||||474|WARNING_TRANSCRIPT_NO_START_CODON,C|downstream_gene_variant|MODIFIER|OS01G0141150|OS01G0141150|transcript|OS01T0141150-00|protein_coding||c.*150…
chr01	2222678	G	GAA	8832.13	0/0	0/0	1|1	0/0	0/0	1/1	1|1	1|1	0/0	1|1	0/0	1|1	1|1	0/0	0/0	0/0	0/0	0/0	0/0	1/1	0/0	0/0	0/0	0/0	GAA|5_prime_UTR_variant|MODIFIER|OS01G0141100|OS01G0141100|transcript|OS01T0141100-01|protein_coding|1/8|c.-91_-90insTT|||||91|,GAA|upstream_gene_variant|MODIFIER|OS01G0141100|OS01G0141100|transcript|OS01T0141100-02|protein_coding||c.-481_-480insTT|||||480|WARNING_TRANSCRIPT_NO_START_CODON,GAA|downstream_gene_variant|MODIFIER|OS01G0141150|OS01G0141150|transcript|OS01T0141150-00|protein_coding||c.…
chr01	2223180	A	AT	12250	0/0	0/0	1/1	0/0	0/0	1/1	1/1	1/1	0/0	1/1	0/0	1/1	1/1	0/0	0/0	0/0	0/0	0/0	0/0	1/1	0/0	0/0	0/0	0/0	AT|upstream_gene_variant|MODIFIER|OS01G0141100|OS01G0141100|transcript|OS01T0141100-02|protein_coding||c.-983_-982insA|||||982|WARNING_TRANSCRIPT_NO_START_CODON,AT|upstream_gene_variant|MODIFIER|OS01G0141100|OS01G0141100|transcript|OS01T0141100-01|protein_coding||c.-593_-592insA|||||369|,AT|downstream_gene_variant|MODIFIER|OS01G0141150|OS01G0141150|transcript|OS01T0141150-00|protein_coding||c.*65…
chr01	2223380	C	CAA	16350	0/0	0/0	1/1	0/0	0/0	1/1	1/1	1/1	0/0	1/1	0/0	1/1	1/1	0/0	0/0	0/0	0/0	0/0	0/0	1/1	0/0	0/0	0/0	0/0	CAA|upstream_gene_variant|MODIFIER|OS01G0141100|OS01G0141100|transcript|OS01T0141100-02|protein_coding||c.-1183_-1182insTT|||||1182|WARNING_TRANSCRIPT_NO_START_CODON,CAA|upstream_gene_variant|MODIFIER|OS01G0141100|OS01G0141100|transcript|OS01T0141100-01|protein_coding||c.-793_-792insTT|||||569|,CAA|downstream_gene_variant|MODIFIER|OS01G0141150|OS01G0141150|transcript|OS01T0141150-00|protein_codin…
chr01	2223607	G	GTAGC	17788	0/0	0/0	1/1	0/0	0/0	1/1	1/1	1/1	0/0	1/1	0/0	1/1	1/1	0/0	0/0	0/0	0/0	0/0	0/0	1/1	0/0	0/0	0/0	0/0	GTAGC|upstream_gene_variant|MODIFIER|OS01G0141100|OS01G0141100|transcript|OS01T0141100-02|protein_coding||c.-1410_-1409insGCTA|||||1409|WARNING_TRANSCRIPT_NO_START_CODON,GTAGC|upstream_gene_variant|MODIFIER|OS01G0141100|OS01G0141100|transcript|OS01T0141100-01|protein_coding||c.-1020_-1019insGCTA|||||796|,GTAGC|downstream_gene_variant|MODIFIER|OS01G0141150|OS01G0141150|transcript|OS01T0141150-00|p…
chr01	2223783	C	CT	12271	0/0	0/0	1/1	0/0	0/0	1/1	1/1	1/1	0/0	1/1	0/0	1/1	1/1	0/0	0/0	0/0	0/0	0/0	0/0	1/1	0/0	0/0	0/0	0/0	CT|upstream_gene_variant|MODIFIER|OS01G0141100|OS01G0141100|transcript|OS01T0141100-02|protein_coding||c.-1586_-1585insA|||||1585|WARNING_TRANSCRIPT_NO_START_CODON,CT|upstream_gene_variant|MODIFIER|OS01G0141100|OS01G0141100|transcript|OS01T0141100-01|protein_coding||c.-1196_-1195insA|||||972|,CT|downstream_gene_variant|MODIFIER|OS01G0141150|OS01G0141150|transcript|OS01T0141150-00|protein_coding||…
chr01	2224285	AC	A	20620.9	0/0	0/0	1|1	0/0	0/0	1|1	1|1	1|1	0/0	1|1	0/0	1|1	1|1	0/0	0/0	0/0	0/0	0/0	0/0	1|1	0/0	0/0	0/0	0/0	A|upstream_gene_variant|MODIFIER|OS01G0141100|OS01G0141100|transcript|OS01T0141100-01|protein_coding||c.-1698delG|||||1474|,A|downstream_gene_variant|MODIFIER|OS01G0141150|OS01G0141150|transcript|OS01T0141150-00|protein_coding||c.*1763delC|||||1763|WARNING_TRANSCRIPT_INCOMPLETE,A|intergenic_region|MODIFIER|OS01G0141100-OS01G0141300|OS01G0141100-OS01G0141300|intergenic_region|OS01G0141100-OS01G014…
chr01	2228249	ATATT	A	16549.9	0/0	0/0	1/1	0/0	0/0	1/1	1/1	1/1	0/0	1/1	0/0	1/1	1/1	0/0	0/0	0/0	0/0	0/0	0/0	1/1	0/0	0/0	0/0	0/0	A|upstream_gene_variant|MODIFIER|EPlOSAG00000033790|EPlOSAG00000033790|transcript|EPlOSAT00000035178|lincRNA||n.-574_-571delTATT|||||574|,A|upstream_gene_variant|MODIFIER|EPlOSAG00000037184|EPlOSAG00000037184|transcript|EPlOSAT00000038572|lincRNA||n.-1543_-1540delTATT|||||1543|,A|upstream_gene_variant|MODIFIER|EPlOSAG00000000773|EPlOSAG00000000773|transcript|EPlOSAT00000002161|lincRNA||n.-1565_-1…
chr01	2228734	G	GAAA	18505	0/0	0/0	1/1	0/0	0/0	1/1	1/1	1/1	0/0	1/1	0/0	1/1	1/1	0/0	0/0	0/0	0/0	0/0	0/0	1/1	0/0	0/0	0/0	0/0	GAAA|upstream_gene_variant|MODIFIER|EPlOSAG00000033790|EPlOSAG00000033790|transcript|EPlOSAT00000035178|lincRNA||n.-90_-89insAAA|||||89|,GAAA|upstream_gene_variant|MODIFIER|EPlOSAG00000037184|EPlOSAG00000037184|transcript|EPlOSAT00000038572|lincRNA||n.-1059_-1058insAAA|||||1058|,GAAA|upstream_gene_variant|MODIFIER|EPlOSAG00000000773|EPlOSAG00000000773|transcript|EPlOSAT00000002161|lincRNA||n.-108…
chr01	2228879	T	TAAATAA	18055	0/0	0/0	1/1	0/0	0/0	1/1	1/1	1/1	0/0	1/1	0/0	1/1	1/1	0/0	0/0	0/0	0/0	0/0	0/0	1/1	0/0	0/0	0/0	0/0	TAAATAA|upstream_gene_variant|MODIFIER|EPlOSAG00000037184|EPlOSAG00000037184|transcript|EPlOSAT00000038572|lincRNA||n.-914_-913insAAATAA|||||913|,TAAATAA|upstream_gene_variant|MODIFIER|EPlOSAG00000000773|EPlOSAG00000000773|transcript|EPlOSAT00000002161|lincRNA||n.-936_-935insAAATAA|||||935|,TAAATAA|downstream_gene_variant|MODIFIER|EPlOSAG00000036902|EPlOSAG00000036902|transcript|EPlOSAT0000003829…
chr01	2229273	TCGCCGCCGCCGC	T	16425.9	0/0	0/0	1/1	0/0	0/0	1/1	1/1	1/1	0/0	1/1	0/0	1/1	1/1	0/0	0/0	0/0	0/0	0/0	0/0	1/1	0/0	0/0	0/0	0/0	T|conservative_inframe_deletion|MODERATE|OS01G0141450|OS01G0141450|transcript|OS01T0141450-00|protein_coding|6/6|c.136_147delCCGCCGCCGCCG|p.Pro46_Pro49del|923/1099|136/285|46/94||INFO_REALIGN_3_PRIME,T|disruptive_inframe_deletion|MODERATE|OS01G0141300|OS01G0141300|transcript|OS01T0141300-00|protein_coding|1/8|c.242_253delGCGGCGGCGGCG|p.Gly81_Gly84del|253/1437|242/1437|81/478||,T|upstream_gene_var…
chr01	2230491	A	AAT	11236	0/0	0/0	1/1	0/0	0/0	1/1	1/1	1/1	0/0	1/1	0/0	1/1	1/1	0/0	0/0	0/0	0/0	0/0	0/0	1/1	0/0	0/0	0/0	0/0	AAT|upstream_gene_variant|MODIFIER|OS01G0141300|OS01G0141300|transcript|OS01T0141300-00|protein_coding||c.-966_-965insAT|||||966|,AAT|upstream_gene_variant|MODIFIER|EPlOSAG00000030061|EPlOSAG00000030061|transcript|EPlOSAT00000031449|lincRNA||n.-1552_-1551insAT|||||1552|,AAT|upstream_gene_variant|MODIFIER|EPlOSAG00000036902|EPlOSAG00000036902|transcript|EPlOSAT00000038290|lincRNA||n.-538_-537insAT…
chr01	2230885	C	CAT,CATATAT	1617.18	0/0	0/0	0/0	./.	0/0	2|2	0/0	0/0	0/0	1|1	0/0	1|1	./.	0/0	0/0	0/0	0/0	0/0	0/0	2/2	0/0	0/0	0/0	0/0	CAT|upstream_gene_variant|MODIFIER|OS01G0141300|OS01G0141300|transcript|OS01T0141300-00|protein_coding||c.-1360_-1359insAT|||||1360|,CATATAT|upstream_gene_variant|MODIFIER|OS01G0141300|OS01G0141300|transcript|OS01T0141300-00|protein_coding||c.-1360_-1359insATATAT|||||1360|,CAT|upstream_gene_variant|MODIFIER|EPlOSAG00000030061|EPlOSAG00000030061|transcript|EPlOSAT00000031449|lincRNA||n.-1946_-1945…
chr01	2230893	TACATAC	T	96.87	0/0	0/0	./.	0/0	0/0	./.	0/0	1|1	0/0	0/0	0/0	0/0	./.	0/0	0/0	0/0	0/0	0/0	0/0	0/0	0/0	0/0	0/0	0/0	T|upstream_gene_variant|MODIFIER|OS01G0141300|OS01G0141300|transcript|OS01T0141300-00|protein_coding||c.-1373_-1368delGTATGT|||||1368|,T|upstream_gene_variant|MODIFIER|EPlOSAG00000030061|EPlOSAG00000030061|transcript|EPlOSAT00000031449|lincRNA||n.-1959_-1954delGTATGT|||||1954|,T|upstream_gene_variant|MODIFIER|EPlOSAG00000036902|EPlOSAG00000036902|transcript|EPlOSAT00000038290|lincRNA||n.-945_-940…
chr01	2230930	CT	C	1115.59	0/0	0/0	./.	0/0	0/0	.	./.	./.	0/0	1|1	0/0	1|1	./.	0/0	0/0	0/0	0/0	0/0	0/0	1|1	0/0	0/0	0/0	0/0	C|upstream_gene_variant|MODIFIER|OS01G0141300|OS01G0141300|transcript|OS01T0141300-00|protein_coding||c.-1405delA|||||1405|,C|upstream_gene_variant|MODIFIER|EPlOSAG00000030061|EPlOSAG00000030061|transcript|EPlOSAT00000031449|lincRNA||n.-1991delA|||||1991|,C|upstream_gene_variant|MODIFIER|EPlOSAG00000036902|EPlOSAG00000036902|transcript|EPlOSAT00000038290|lincRNA||n.-977delA|||||977|,C|upstream_ge…
chr01	2231000	G	GC	7843.98	0/0	0/0	1/1	0/0	0/0	1/1	1/1	1/1	0/0	1/1	0/0	1/1	1/1	0/0	0/0	0/0	0/0	0/0	0/0	1/1	0/0	0/0	0/0	0/0	GC|upstream_gene_variant|MODIFIER|OS01G0141300|OS01G0141300|transcript|OS01T0141300-00|protein_coding||c.-1475_-1474insG|||||1475|,GC|upstream_gene_variant|MODIFIER|EPlOSAG00000036902|EPlOSAG00000036902|transcript|EPlOSAT00000038290|lincRNA||n.-1047_-1046insG|||||1047|,GC|upstream_gene_variant|MODIFIER|EPlOSAG00000001253|EPlOSAG00000001253|transcript|EPlOSAT00000002641|lincRNA||n.-1069_-1068insG|…
chr01	2231155	C	CA	8754.98	0/0	0/0	1/1	0/0	0/0	1/1	1/1	1/1	0/0	1/1	0/0	1/1	1/1	0/0	0/0	0/0	0/0	0/0	0/0	1/1	0/0	0/0	0/0	0/0	CA|upstream_gene_variant|MODIFIER|OS01G0141300|OS01G0141300|transcript|OS01T0141300-00|protein_coding||c.-1630_-1629insT|||||1630|,CA|upstream_gene_variant|MODIFIER|EPlOSAG00000036902|EPlOSAG00000036902|transcript|EPlOSAT00000038290|lincRNA||n.-1202_-1201insT|||||1202|,CA|upstream_gene_variant|MODIFIER|EPlOSAG00000001253|EPlOSAG00000001253|transcript|EPlOSAT00000002641|lincRNA||n.-1224_-1223insT|…
chr01	2233149	C	CCTCT	11374	0/0	0/0	1/1	0/0	0/0	1/1	1/1	1/1	0/0	1/1	0/0	1/1	1/1	0/0	0/0	0/0	0/0	0/0	0/0	1/1	0/0	0/0	0/0	0/0	CCTCT|intergenic_region|MODIFIER|EPlOSAG00000036902-EPlOSAG00000015730|EPlOSAG00000036902-EPlOSAG00000015730|intergenic_region|EPlOSAG00000036902-EPlOSAG00000015730|||n.2233149_2233150insCTCT||||||
chr01	2237259	A	AG	17692	0/0	0/0	1|1	0/0	0/0	1|1	1|1	1|1	0/0	1|1	0/0	1|1	1|1	0/0	0/0	0/0	0/0	0/0	0/0	1|1	0/0	0/0	0/0	0/0	AG|upstream_gene_variant|MODIFIER|EPlOSAG00000015730|EPlOSAG00000015730|transcript|EPlOSAT00000017118|lincRNA||n.-338_-337insG|||||337|,AG|intergenic_region|MODIFIER|EPlOSAG00000036902-EPlOSAG00000015730|EPlOSAG00000036902-EPlOSAG00000015730|intergenic_region|EPlOSAG00000036902-EPlOSAG00000015730|||n.2237259_2237260insG||||||
chr01	2239041	GAA	G	16508.9	0/0	0/0	1/1	0/0	0/0	1/1	1/1	1/1	0/0	1/1	0/0	1/1	1/1	0/0	0/0	0/0	0/0	0/0	0/0	1/1	0/0	0/0	0/0	0/0	G|upstream_gene_variant|MODIFIER|EPlOSAG00000024940|EPlOSAG00000024940|transcript|EPlOSAT00000026328|lincRNA||n.-285_-284delAA|||||285|,G|upstream_gene_variant|MODIFIER|EPlOSAG00000040659|EPlOSAG00000040659|transcript|EPlOSAT00000042047|lincRNA||n.-294_-293delAA|||||294|,G|downstream_gene_variant|MODIFIER|EPlOSAG00000015730|EPlOSAG00000015730|transcript|EPlOSAT00000017118|lincRNA||n.*1372_*1373de…
chr01	2239397	C	CGT	21223	0/0	0/0	1|1	0/0	0/0	1|1	1|1	1|1	0/0	1|1	0/0	1|1	1|1	0/0	0/0	0/0	0/0	0/0	0/0	1|1	0/0	0/0	0/0	0/0	CGT|downstream_gene_variant|MODIFIER|EPlOSAG00000015730|EPlOSAG00000015730|transcript|EPlOSAT00000017118|lincRNA||n.*1727_*1728insGT|||||1728|,CGT|non_coding_transcript_exon_variant|MODIFIER|EPlOSAG00000024940|EPlOSAG00000024940|transcript|EPlOSAT00000026328|lincRNA|1/1|n.71_72insGT||||||,CGT|non_coding_transcript_exon_variant|MODIFIER|EPlOSAG00000039129|EPlOSAG00000039129|transcript|EPlOSAT00000…
chr01	2239398	A	AGTAACG	21223	0/0	0/0	1|1	0/0	0/0	1|1	1|1	1|1	0/0	1|1	0/0	1|1	1|1	0/0	0/0	0/0	0/0	0/0	0/0	1|1	0/0	0/0	0/0	0/0	AGTAACG|downstream_gene_variant|MODIFIER|EPlOSAG00000015730|EPlOSAG00000015730|transcript|EPlOSAT00000017118|lincRNA||n.*1728_*1729insGTAACG|||||1729|,AGTAACG|non_coding_transcript_exon_variant|MODIFIER|EPlOSAG00000024940|EPlOSAG00000024940|transcript|EPlOSAT00000026328|lincRNA|1/1|n.72_73insGTAACG||||||,AGTAACG|non_coding_transcript_exon_variant|MODIFIER|EPlOSAG00000039129|EPlOSAG00000039129|tra…
chr01	2243614	C	CAGGAAGATGAAGAATATTAATTTTTAGGAAGATGAATCCCCACACAAAAAAAATT	15115	0/0	0/0	1/1	0/0	0/0	1/1	1/1	1/1	0/0	1/1	0/0	1/1	1/1	0/0	0/0	0/0	0/0	0/0	0/0	1/1	0/0	0/0	0/0	0/0	CAGGAAGATGAAGAATATTAATTTTTAGGAAGATGAATCCCCACACAAAAAAAATT|upstream_gene_variant|MODIFIER|EPlOSAG00000040409|EPlOSAG00000040409|transcript|EPlOSAT00000041797|lincRNA||n.-1593_-1592insAATTTTTTTTGTGTGGGGATTCATCTTCCTAAAAATTAATATTCTTCATCTTCCT|||||1593|,CAGGAAGATGAAGAATATTAATTTTTAGGAAGATGAATCCCCACACAAAAAAAATT|downstream_gene_variant|MODIFIER|EPlOSAG00000041484|EPlOSAG00000041484|transcript|EPlOSAT000000…
chr01	2243682	G	GT	6438.05	0/0	0/0	1/1	0/0	0/0	1/1	1/1	1/1	0/0	1/1	0/0	1/1	1/1	0/0	0/0	0/0	0/0	0/0	0/0	1/1	./.	0/0	0/0	0/0	GT|upstream_gene_variant|MODIFIER|EPlOSAG00000040409|EPlOSAG00000040409|transcript|EPlOSAT00000041797|lincRNA||n.-1661_-1660insA|||||1661|,GT|downstream_gene_variant|MODIFIER|EPlOSAG00000041484|EPlOSAG00000041484|transcript|EPlOSAT00000042872|lincRNA||n.*1660_*1661insT|||||1661|,GT|intergenic_region|MODIFIER|EPlOSAG00000040409-OS01G0141600|EPlOSAG00000040409-OS01G0141600|intergenic_region|EPlOSAG…
chr01	2254943	CGCGGCGGCG	C	8914.94	0/0	0/0	1/1	0/0	0/0	1/1	1/1	1/1	0/0	1/1	0/0	1/1	1/1	0/0	0/0	0/0	0/0	0/0	0/0	1/1	0/0	0/0	0/0	0/0	C|conservative_inframe_deletion|MODERATE|OS01G0141700|OS01G0141700|transcript|OS01T0141700-01|protein_coding|1/11|c.49_57delCGCCGCCGC|p.Arg17_Arg19del|130/2091|49/1752|17/583||
chr01	2255024	CA	C	10743.9	0/0	0/0	1/1	0/0	0/0	1/1	1/1	1/1	0/0	1/1	0/0	1/1	1/1	0/0	0/0	0/0	0/0	0/0	0/0	1/1	0/0	0/0	0/0	0/0	C|5_prime_UTR_variant|MODIFIER|OS01G0141700|OS01G0141700|transcript|OS01T0141700-01|protein_coding|1/11|c.-25delT|||||25|
chr01	2255461	AC	A	10382.9	0/0	0/0	1/1	0/0	0/0	1/1	1/1	1/1	0/0	1/1	0/0	1/1	1/1	0/0	0/0	0/0	0/0	0/0	0/0	1/1	0/0	0/0	0/0	0/0	A|upstream_gene_variant|MODIFIER|OS01G0141700|OS01G0141700|transcript|OS01T0141700-01|protein_coding||c.-462delG|||||389|,A|intergenic_region|MODIFIER|OS01G0141700-EPlOSAG00000023148|OS01G0141700-EPlOSAG00000023148|intergenic_region|OS01G0141700-EPlOSAG00000023148|||n.2255462delC||||||
chr01	2255649	CT	C	9356.94	0/0	0/0	1/1	0/0	0/0	1/1	1/1	1/1	0/0	1/1	0/0	1/1	1/1	0/0	0/0	0/0	0/0	0/0	0/0	1/1	0/0	0/0	0/0	0/0	C|upstream_gene_variant|MODIFIER|OS01G0141700|OS01G0141700|transcript|OS01T0141700-01|protein_coding||c.-650delA|||||577|,C|intergenic_region|MODIFIER|OS01G0141700-EPlOSAG00000023148|OS01G0141700-EPlOSAG00000023148|intergenic_region|OS01G0141700-EPlOSAG00000023148|||n.2255650delT||||||
chr01	2258834	GT	G	10115.9	0/0	0/0	1|1	0/0	0/0	1|1	1|1	1|1	0/0	1|1	0/0	1|1	1|1	0/0	0/0	0/0	0/0	0/0	0/0	1|1	0/0	0/0	0/0	0/0	G|upstream_gene_variant|MODIFIER|EPlOSAG00000023148|EPlOSAG00000023148|transcript|EPlOSAT00000024536|lincRNA||n.-893delT|||||893|,G|intergenic_region|MODIFIER|OS01G0141700-EPlOSAG00000023148|OS01G0141700-EPlOSAG00000023148|intergenic_region|OS01G0141700-EPlOSAG00000023148|||n.2258835delT||||||
chr01	2259527	G	GAA,GA	12441.1	0/0	0/0	1/1	0/0	0/0	2/2	2/2	1/1	0/0	2/2	0/0	2/2	1/1	0/0	0/0	0/0	0/0	0/0	0/0	2/2	0/0	0/0	0/0	0/0	GA|upstream_gene_variant|MODIFIER|EPlOSAG00000023148|EPlOSAG00000023148|transcript|EPlOSAT00000024536|lincRNA||n.-201_-200insA|||||200|,GAA|upstream_gene_variant|MODIFIER|EPlOSAG00000023148|EPlOSAG00000023148|transcript|EPlOSAT00000024536|lincRNA||n.-201_-200insAA|||||200|,GA|upstream_gene_variant|MODIFIER|OS01G0141900|OS01G0141900|transcript|OS01T0141900-01|protein_coding||c.-2204_-2203insA|||||…
chr01	2260074	C	CAT	8103.97	0/0	0/0	1/1	0/0	0/0	1/1	1/1	1/1	0/0	1/1	0/0	1/1	1/1	0/0	0/0	0/0	0/0	0/0	0/0	1/1	0/0	0/0	0/0	0/0	CAT|upstream_gene_variant|MODIFIER|OS01G0141900|OS01G0141900|transcript|OS01T0141900-01|protein_coding||c.-1657_-1656insAT|||||1426|,CAT|downstream_gene_variant|MODIFIER|EPlOSAG00000023148|EPlOSAG00000023148|transcript|EPlOSAT00000024536|lincRNA||n.*319_*320insAT|||||320|,CAT|intergenic_region|MODIFIER|EPlOSAG00000023148-OS01G0141900|EPlOSAG00000023148-OS01G0141900|intergenic_region|EPlOSAG000000…
chr01	2260120	GT	G	5071.04	0/0	0/0	./.	0/0	0/0	1|1	1|1	1|1	0/0	1|1	0/0	1|1	1|1	0/0	0/0	0/0	0/0	0/0	0/0	1|1	0/0	0/0	0/0	0/0	G|upstream_gene_variant|MODIFIER|OS01G0141900|OS01G0141900|transcript|OS01T0141900-01|protein_coding||c.-1610delT|||||1380|,G|downstream_gene_variant|MODIFIER|EPlOSAG00000023148|EPlOSAG00000023148|transcript|EPlOSAT00000024536|lincRNA||n.*366delT|||||366|,G|intergenic_region|MODIFIER|EPlOSAG00000023148-OS01G0141900|EPlOSAG00000023148-OS01G0141900|intergenic_region|EPlOSAG00000023148-OS01G0141900|…
chr01	2260198	T	TA	7667.98	0/0	0/0	1/1	0/0	0/0	1/1	1/1	1/1	0/0	1/1	0/0	1/1	1/1	0/0	0/0	0/0	0/0	0/0	0/0	1/1	0/0	0/0	0/0	0/0	TA|upstream_gene_variant|MODIFIER|OS01G0141900|OS01G0141900|transcript|OS01T0141900-01|protein_coding||c.-1533_-1532insA|||||1302|,TA|downstream_gene_variant|MODIFIER|EPlOSAG00000023148|EPlOSAG00000023148|transcript|EPlOSAT00000024536|lincRNA||n.*443_*444insA|||||444|,TA|intergenic_region|MODIFIER|EPlOSAG00000023148-OS01G0141900|EPlOSAG00000023148-OS01G0141900|intergenic_region|EPlOSAG00000023148…
chr01	2260381	A	AAT	17378	0/0	0/0	1/1	0/0	0/0	1/1	1/1	1/1	0/0	1/1	0/0	1/1	1/1	0/0	0/0	0/0	0/0	0/0	0/0	1/1	0/0	0/0	0/0	0/0	AAT|upstream_gene_variant|MODIFIER|OS01G0141900|OS01G0141900|transcript|OS01T0141900-01|protein_coding||c.-1350_-1349insAT|||||1119|,AAT|downstream_gene_variant|MODIFIER|EPlOSAG00000023148|EPlOSAG00000023148|transcript|EPlOSAT00000024536|lincRNA||n.*626_*627insAT|||||627|,AAT|intergenic_region|MODIFIER|EPlOSAG00000023148-OS01G0141900|EPlOSAG00000023148-OS01G0141900|intergenic_region|EPlOSAG000000…
chr01	2260879	AT	A	11818.9	0/0	0/0	1/1	0/0	0/0	1/1	1/1	1/1	0/0	1/1	0/0	1/1	1/1	0/0	0/0	0/0	0/0	0/0	0/0	1/1	0/0	0/0	0/0	0/0	A|upstream_gene_variant|MODIFIER|OS01G0141900|OS01G0141900|transcript|OS01T0141900-01|protein_coding||c.-851delT|||||621|,A|downstream_gene_variant|MODIFIER|EPlOSAG00000023148|EPlOSAG00000023148|transcript|EPlOSAT00000024536|lincRNA||n.*1125delT|||||1125|,A|intergenic_region|MODIFIER|EPlOSAG00000023148-OS01G0141900|EPlOSAG00000023148-OS01G0141900|intergenic_region|EPlOSAG00000023148-OS01G0141900|…
chr01	2261349	AG	A	13793.9	0/0	0/0	1|1	0/0	0/0	1|1	1|1	1|1	0/0	1|1	0/0	1|1	1|1	0/0	0/0	0/0	0/0	0/0	0/0	1|1	0/0	0/0	0/0	0/0	A|upstream_gene_variant|MODIFIER|OS01G0141900|OS01G0141900|transcript|OS01T0141900-01|protein_coding||c.-381delG|||||151|,A|downstream_gene_variant|MODIFIER|EPlOSAG00000023148|EPlOSAG00000023148|transcript|EPlOSAT00000024536|lincRNA||n.*1595delG|||||1595|,A|intergenic_region|MODIFIER|EPlOSAG00000023148-OS01G0141900|EPlOSAG00000023148-OS01G0141900|intergenic_region|EPlOSAG00000023148-OS01G0141900|…
chr01	2261357	A	AG	13940	0/0	0/0	1|1	0/0	0/0	1|1	1|1	1|1	0/0	1|1	0/0	1|1	1|1	0/0	0/0	0/0	0/0	0/0	0/0	1|1	0/0	0/0	0/0	0/0	AG|upstream_gene_variant|MODIFIER|OS01G0141900|OS01G0141900|transcript|OS01T0141900-01|protein_coding||c.-374_-373insG|||||143|,AG|downstream_gene_variant|MODIFIER|EPlOSAG00000023148|EPlOSAG00000023148|transcript|EPlOSAT00000024536|lincRNA||n.*1602_*1603insG|||||1603|,AG|intergenic_region|MODIFIER|EPlOSAG00000023148-OS01G0141900|EPlOSAG00000023148-OS01G0141900|intergenic_region|EPlOSAG00000023148…
chr01	2261383	T	TA	12070	0/0	0/0	1|1	0/0	0/0	1/1	1|1	1|1	0/0	1|1	0/0	1|1	1|1	0/0	0/0	0/0	0/0	0/0	0/0	1|1	0/0	0/0	0/0	0/0	TA|upstream_gene_variant|MODIFIER|OS01G0141900|OS01G0141900|transcript|OS01T0141900-01|protein_coding||c.-348_-347insA|||||117|,TA|downstream_gene_variant|MODIFIER|EPlOSAG00000023148|EPlOSAG00000023148|transcript|EPlOSAT00000024536|lincRNA||n.*1628_*1629insA|||||1629|,TA|intergenic_region|MODIFIER|EPlOSAG00000023148-OS01G0141900|EPlOSAG00000023148-OS01G0141900|intergenic_region|EPlOSAG00000023148…
chr01	2261509	CCTCAGCTCAGCTCAG	C	8288.94	0/0	0/0	1|1	0/0	0/0	1|1	1|1	1|1	0/0	1|1	0/0	1|1	1|1	0/0	0/0	0/0	0/0	0/0	0/0	1|1	0/0	0/0	0/0	0/0	C|5_prime_UTR_variant|MODIFIER|OS01G0141900|OS01G0141900|transcript|OS01T0141900-01|protein_coding|1/5|c.-212_-198delGCTCAGCTCAGCTCA|||||198|INFO_REALIGN_3_PRIME,C|downstream_gene_variant|MODIFIER|EPlOSAG00000023148|EPlOSAG00000023148|transcript|EPlOSAT00000024536|lincRNA||n.*1755_*1769delCTCAGCTCAGCTCAG|||||1755|
chr01	2261625	C	CCTCCTCCTCCTCCCTG	3936.63	0/0	0/0	1|1	0/0	0/0	1|1	1|1	1|1	0/0	1|1	0/0	1|1	1|1	0/0	0/0	0/0	0/0	0/0	0/0	1|1	0/0	0/0	0/0	0/0	CCTCCTCCTCCTCCCTG|5_prime_UTR_variant|MODIFIER|OS01G0141900|OS01G0141900|transcript|OS01T0141900-01|protein_coding|1/5|c.-105_-104insTCCTCCTCCTCCCTGC|||||104|INFO_REALIGN_3_PRIME,CCTCCTCCTCCTCCCTG|downstream_gene_variant|MODIFIER|EPlOSAG00000023148|EPlOSAG00000023148|transcript|EPlOSAT00000024536|lincRNA||n.*1870_*1871insCTCCTCCTCCTCCCTG|||||1871|
chr01	2261640	CGGGG	C	3442.19	0/0	0/0	1|1	0/0	0/0	1|1	1|1	1|1	0/0	1|1	0/0	1|1	1|1	0/0	0/0	0/0	0/0	0/0	0/0	1|1	0/0	0/0	0/0	0/0	C|5_prime_UTR_variant|MODIFIER|OS01G0141900|OS01G0141900|transcript|OS01T0141900-01|protein_coding|1/5|c.-89_-86delGGGG|||||86|INFO_REALIGN_3_PRIME,C|downstream_gene_variant|MODIFIER|EPlOSAG00000023148|EPlOSAG00000023148|transcript|EPlOSAT00000024536|lincRNA||n.*1886_*1889delGGGG|||||1886|
chr01	2261751	TGCG	T	382.6	0/0	0/0	./.	0/0	0/0	0/0	0/0	1|1	0/0	0/0	0/0	./.	./.	0/0	0/0	0/0	0/0	0/0	0/0	1|1	0/0	0/0	0/0	0/0	T|disruptive_inframe_deletion|MODERATE|OS01G0141900|OS01G0141900|transcript|OS01T0141900-01|protein_coding|1/5|c.32_34delCGG|p.Ala11del|262/2556|32/1821|11/606||INFO_REALIGN_3_PRIME,T|downstream_gene_variant|MODIFIER|EPlOSAG00000023148|EPlOSAG00000023148|transcript|EPlOSAT00000024536|lincRNA||n.*1997_*1999delGCG|||||1997|
chr01	2261771	GC	G	863.76	0/0	0/0	./.	0/0	0/0	./.	./.	1|1	0/0	./.	0/0	./.	./.	0/0	0/0	0/0	0/0	0/0	0/0	1|1	0/0	0/0	0/0	0/0	G|frameshift_variant|HIGH|OS01G0141900|OS01G0141900|transcript|OS01T0141900-01|protein_coding|1/5|c.42delC|p.Gly15fs|272/2556|42/1821|14/606||
chr01	2261773	GGC	G	942.51	0/0	0/0	0/0	0/0	0/0	0/0	./.	1|1	0/0	0/0	0/0	0/0	./.	0/0	0/0	0/0	0/0	0/0	0/0	1|1	0/0	0/0	0/0	0/0	G|frameshift_variant|HIGH|OS01G0141900|OS01G0141900|transcript|OS01T0141900-01|protein_coding|1/5|c.45_46delCG|p.Asp16fs|275/2556|45/1821|15/606||INFO_REALIGN_3_PRIME
chr01	2261961	A	ACCG	14187	0/0	0/0	1|1	0/0	0/0	1|1	1|1	1|1	0/0	1|1	0/0	1|1	1|1	0/0	0/0	0/0	0/0	0/0	0/0	1|1	0/0	0/0	0/0	0/0	ACCG|disruptive_inframe_insertion|MODERATE|OS01G0141900|OS01G0141900|transcript|OS01T0141900-01|protein_coding|1/5|c.239_241dupCGC|p.Pro80dup|472/2556|242/1821|81/606||INFO_REALIGN_3_PRIME
chr01	2261991	TGA	T	12960.9	0/0	0/0	1|1	0/0	0/0	1|1	1|1	1|1	0/0	1|1	0/0	1|1	1|1	0/0	0/0	0/0	0/0	0/0	0/0	1|1	0/0	0/0	0/0	0/0	T|splice_region_variant&intron_variant|LOW|OS01G0141900|OS01G0141900|transcript|OS01T0141900-01|protein_coding|1/4|c.259+3_259+4delGA||||||
chr01	2262001	CCGCG	C	8707.94	0/0	0/0	1|1	0/0	0/0	1|1	1|1	1|1	0/0	1|1	0/0	1|1	1|1	0/0	0/0	0/0	0/0	0/0	0/0	1|1	0/0	0/0	0/0	0/0	C|intron_variant|MODIFIER|OS01G0141900|OS01G0141900|transcript|OS01T0141900-01|protein_coding|1/4|c.259+13_259+16delCGCG||||||
chr01	2262008	G	GCC	8887.98	0/0	0/0	1|1	0/0	0/0	1|1	1|1	1|1	0/0	1|1	0/0	1|1	1|1	0/0	0/0	0/0	0/0	0/0	0/0	1|1	0/0	0/0	0/0	0/0	GCC|intron_variant|MODIFIER|OS01G0141900|OS01G0141900|transcript|OS01T0141900-01|protein_coding|1/4|c.259+19_259+20insCC||||||
chr01	2262011	CGGGATGCTG	C	8707.94	0/0	0/0	1|1	0/0	0/0	1|1	1|1	1|1	0/0	1|1	0/0	1|1	1|1	0/0	0/0	0/0	0/0	0/0	0/0	1|1	0/0	0/0	0/0	0/0	C|intron_variant|MODIFIER|OS01G0141900|OS01G0141900|transcript|OS01T0141900-01|protein_coding|1/4|c.259+23_259+31delGGGATGCTG||||||
chr01	2262037	T	TTAC	10318	0/0	0/0	1|1	0/0	0/0	1|1	1|1	1|1	0/0	1|1	0/0	1/1	1|1	0/0	0/0	0/0	0/0	0/0	0/0	1|1	0/0	0/0	0/0	0/0	TTAC|intron_variant|MODIFIER|OS01G0141900|OS01G0141900|transcript|OS01T0141900-01|protein_coding|1/4|c.259+48_259+49insTAC||||||
chr01	2262074	CAG	C	12299.9	0/0	0/0	1|1	0/0	0/0	1|1	1|1	1|1	0/0	1|1	0/0	1|1	1|1	0/0	0/0	0/0	0/0	0/0	0/0	1|1	0/0	0/0	0/0	0/0	C|intron_variant|MODIFIER|OS01G0141900|OS01G0141900|transcript|OS01T0141900-01|protein_coding|1/4|c.260-36_260-35delAG||||||
chr01	2262078	GTCTGGGGTTTTGGGGGGTGA	G	12286.9	0/0	0/0	1|1	0/0	0/0	1|1	1|1	1|1	0/0	1|1	0/0	1|1	1|1	0/0	0/0	0/0	0/0	0/0	0/0	1|1	0/0	0/0	0/0	0/0	G|intron_variant|MODIFIER|OS01G0141900|OS01G0141900|transcript|OS01T0141900-01|protein_coding|1/4|c.260-32_260-13delTCTGGGGTTTTGGGGGGTGA||||||
chr01	2262293	T	TTG	19372	0/0	0/0	1|1	0/0	0/0	1|1	1|1	1|1	0/0	1|1	0/0	1|1	1|1	0/0	0/0	0/0	0/0	0/0	0/0	1|1	0/0	0/0	0/0	0/0	TTG|intron_variant|MODIFIER|OS01G0141900|OS01G0141900|transcript|OS01T0141900-01|protein_coding|2/4|c.365+77_365+78insTG||||||
chr01	2262421	G	GA	19980	0/0	0/0	1|1	0/0	0/0	1|1	1|1	1|1	0/0	1|1	0/0	1|1	1|1	0/0	0/0	0/0	0/0	0/0	0/0	1|1	0/0	0/0	0/0	0/0	GA|intron_variant|MODIFIER|OS01G0141900|OS01G0141900|transcript|OS01T0141900-01|protein_coding|2/4|c.365+205_365+206insA||||||
chr01	2262679	TA	T	21368.9	0/0	0/0	1|1	0/0	0/0	1|1	1|1	1|1	0/0	1|1	0/0	1|1	1|1	0/0	0/0	0/0	0/0	0/0	0/0	1|1	0/0	0/0	0/0	0/0	T|intron_variant|MODIFIER|OS01G0141900|OS01G0141900|transcript|OS01T0141900-01|protein_coding|2/4|c.365+464delA||||||
chr01	2263522	CT	C	3802.58	0/0	0/0	1|1	0/0	0/0	1|1	1|1	1|1	0/0	1|1	0/0	1|1	1|1	0/0	0/0	0/0	0/0	0/0	0/0	1|1	0/0	0/0	0/0	0/0	C|intron_variant|MODIFIER|OS01G0141900|OS01G0141900|transcript|OS01T0141900-01|protein_coding|2/4|c.366-223delT||||||
chr01	2263533	CT	C	3637.47	0/0	0/0	1|1	0/0	0/0	1|1	1|1	1|1	0/0	1|1	0/0	1|1	1|1	0/0	0/0	0/0	0/0	0/0	0/0	1|1	0/0	0/0	0/0	0/0	C|intron_variant|MODIFIER|OS01G0141900|OS01G0141900|transcript|OS01T0141900-01|protein_coding|2/4|c.366-212delT||||||
chr01	2263640	ATG	A	4904.62	0/0	0/0	1|1	0/0	0/0	1|1	1|1	1|1	0/0	1|1	0/0	1|1	1|1	0/0	0/0	0/0	0/0	0/0	0/0	1|1	0/0	0/0	0/0	0/0	A|intron_variant|MODIFIER|OS01G0141900|OS01G0141900|transcript|OS01T0141900-01|protein_coding|2/4|c.366-105_366-104delTG||||||
chr01	2263672	TC	T	6002.94	0/0	0/0	1|1	0/0	0/0	1|1	1|1	1|1	0/0	1|1	0/0	1|1	1|1	0/0	0/0	0/0	0/0	0/0	0/0	1|1	0/0	0/0	0/0	0/0	T|intron_variant|MODIFIER|OS01G0141900|OS01G0141900|transcript|OS01T0141900-01|protein_coding|2/4|c.366-73delC||||||
chr01	2264076	TATTATGTCGGAC	T	13839.9	0/0	0/0	1|1	0/0	0/0	1|1	1|1	1|1	0/0	1|1	0/0	1|1	1|1	0/0	0/0	0/0	0/0	0/0	0/0	1|1	0/0	0/0	0/0	0/0	T|intron_variant|MODIFIER|OS01G0141900|OS01G0141900|transcript|OS01T0141900-01|protein_coding|3/4|c.478-219_478-208delATTATGTCGGAC||||||
chr01	2265402	C	CT	14312	0/0	0/0	1/1	0/0	0/0	1/1	1/1	1/1	0/0	1/1	0/0	1/1	1/1	0/0	0/0	0/0	0/0	0/0	0/0	1/1	0/0	0/0	0/0	0/0	CT|splice_region_variant&intron_variant|LOW|OS01G0141900|OS01G0141900|transcript|OS01T0141900-01|protein_coding|4/4|c.1578+6_1578+7insT||||||,CT|upstream_gene_variant|MODIFIER|EPlOSAG00000010538|EPlOSAG00000010538|transcript|EPlOSAT00000011926|lincRNA||n.-1846_-1845insT|||||1845|,CT|downstream_gene_variant|MODIFIER|EGY2|OS01G0142100|transcript|OS01T0142100-01|protein_coding||c.*1247_*1248insA||||…
chr01	2274606	TA	T	5851.94	0/0	0/0	1/1	0/0	0/0	1/1	1/1	1/1	0/0	1/1	0/0	1/1	1/1	0/0	0/0	0/0	0/0	0/0	0/0	1/1	0/0	0/0	0/0	0/0	T|upstream_gene_variant|MODIFIER|OS01G0142300|OS01G0142300|transcript|OS01T0142300-01|protein_coding||c.-746delA|||||632|,T|upstream_gene_variant|MODIFIER|OS01G0142300|OS01G0142300|transcript|OS01T0142300-02|protein_coding||c.-746delA|||||706|,T|downstream_gene_variant|MODIFIER|OS01G0142200|OS01G0142200|transcript|OS01T0142200-01|protein_coding||c.*1608delA|||||883|,T|intergenic_region|MODIFIER|O…
chr01	2275483	T	TTC	13044.5	0/0	0/0	1/1	0/0	0/0	./.	1/1	1/1	0/0	1/1	0/0	1/1	1/1	0/0	0/0	0/0	0/0	0/0	0/0	1/1	0/0	0/0	0/0	0/0	TTC|downstream_gene_variant|MODIFIER|OS01G0142200|OS01G0142200|transcript|OS01T0142200-01|protein_coding||c.*2484_*2485insTC|||||1760|,TTC|intron_variant|MODIFIER|OS01G0142300|OS01G0142300|transcript|OS01T0142300-01|protein_coding|1/10|c.113+18_113+19insTC||||||,TTC|intron_variant|MODIFIER|OS01G0142300|OS01G0142300|transcript|OS01T0142300-02|protein_coding|1/10|c.113+18_113+19insTC||||||
chr01	2280532	AT	A	11660.9	0/0	0/0	1/1	0/0	0/0	1/1	1/1	1/1	0/0	1/1	0/0	1/1	1/1	0/0	0/0	0/0	0/0	0/0	0/0	1/1	0/0	0/0	0/0	0/0	A|downstream_gene_variant|MODIFIER|OS01G0142300|OS01G0142300|transcript|OS01T0142300-01|protein_coding||c.*1955delT|||||1776|,A|downstream_gene_variant|MODIFIER|EPlOSAG00000001732|EPlOSAG00000001732|transcript|EPlOSAT00000003120|lincRNA||n.*1362delT|||||1362|,A|downstream_gene_variant|MODIFIER|OS01G0142400|OS01G0142400|transcript|OS01T0142400-00|lincRNA||n.*1364delT|||||1364|,A|downstream_gene_va…
chr01	2281918	A	AAAG	6722.95	0/0	0/0	1/1	0/0	0/0	1/1	1/1	1/1	0/0	1/1	0/0	1/1	1/1	0/0	0/0	0/0	0/0	0/0	0/0	1/1	0/0	0/0	0/0	0/0	AAAG|3_prime_UTR_variant|MODIFIER|OS01G0142500|OS01G0142500|transcript|OS01T0142500-01|protein_coding|3/3|c.*615_*617dupCTT|||||617|
chr01	2281960	G	GA	6832.92	0/0	0/0	1/1	0/0	0/0	1/1	1/1	1/1	0/0	1/1	0/0	1/1	1/1	0/0	0/0	0/0	0/0	0/0	0/0	1/1	0/0	0/0	0/0	0/0	GA|3_prime_UTR_variant|MODIFIER|OS01G0142500|OS01G0142500|transcript|OS01T0142500-01|protein_coding|3/3|c.*575dupT|||||575|
chr01	2283181	CAA	C,CA	444.08	0/0	0/0	./.	0/0	0/0	1|1	0/0	1/1	0/0	./.	0/0	2/2	0/0	0/0	0/0	0/0	0/0	0/0	0|0	1/1	0/0	0/0	0/0	0/0	C|intron_variant|MODIFIER|OS01G0142500|OS01G0142500|transcript|OS01T0142500-01|protein_coding|2/2|c.444-206_444-205delTT||||||,CA|intron_variant|MODIFIER|OS01G0142500|OS01G0142500|transcript|OS01T0142500-01|protein_coding|2/2|c.444-206delT||||||
chr01	2283313	CTCCCATAGCCA	C	13032.9	0/0	0/0	1/1	0/0	0/0	1/1	1/1	1/1	0/0	1/1	0/0	1/1	1/1	0/0	0/0	0/0	0/0	0/0	0/0	1/1	0/0	0/0	0/0	0/0	C|intron_variant|MODIFIER|OS01G0142500|OS01G0142500|transcript|OS01T0142500-01|protein_coding|2/2|c.443+199_443+209delTGGCTATGGGA||||||
chr01	2286079	CAA	C	14661.4	0/0	0/0	1/1	0/0	0/0	1/1	1/1	1/1	0/0	1/1	0/0	1/1	1/1	0/0	0/0	0/0	0/0	0/0	0/0	1/1	0/0	0/0	0/0	0/0	C|upstream_gene_variant|MODIFIER|OS01G0142500|OS01G0142500|transcript|OS01T0142500-01|protein_coding||c.-2116_-2115delTT|||||1305|,C|intergenic_region|MODIFIER|OS01G0142500-EPlOSAG00000038653|OS01G0142500-EPlOSAG00000038653|intergenic_region|OS01G0142500-EPlOSAG00000038653|||n.2286080_2286081delAA||||||
chr01	2286827	C	CGTGAAGTAG	19196	0/0	0/0	1|1	0/0	0/0	1/1	1|1	1|1	0/0	1|1	0/0	1|1	1|1	0/0	0/0	0/0	0/0	0/0	0/0	1|1	0/0	0/0	0/0	0/0	CGTGAAGTAG|intergenic_region|MODIFIER|OS01G0142500-EPlOSAG00000038653|OS01G0142500-EPlOSAG00000038653|intergenic_region|OS01G0142500-EPlOSAG00000038653|||n.2286827_2286828insGTGAAGTAG||||||
chr01	2289024	TA	T	9502.11	0/0	0/0	1/1	0/0	0/0	1/1	1/1	1/1	0/0	1/1	0/0	1/1	1/1	0/0	0/0	0/0	0/0	0/0	0/0	1/1	0/0	0/0	0/0	0/0	T|upstream_gene_variant|MODIFIER|EPlOSAG00000038881|EPlOSAG00000038881|transcript|EPlOSAT00000040269|lincRNA||n.-1976delA|||||1976|,T|downstream_gene_variant|MODIFIER|EPlOSAG00000038653|EPlOSAG00000038653|transcript|EPlOSAT00000040041|lincRNA||n.*1976delT|||||1976|,T|intergenic_region|MODIFIER|OS01G0142500-EPlOSAG00000038653|OS01G0142500-EPlOSAG00000038653|intergenic_region|OS01G0142500-EPlOSAG00…
chr01	2289710	CA	C	11045.9	0/0	0/0	1/1	0/0	0/0	1/1	1/1	1/1	0/0	1/1	0/0	1/1	1/1	0/0	0/0	0/0	0/0	0/0	0/0	1/1	0/0	0/0	0/0	0/0	C|upstream_gene_variant|MODIFIER|EPlOSAG00000038881|EPlOSAG00000038881|transcript|EPlOSAT00000040269|lincRNA||n.-1290delA|||||1290|,C|downstream_gene_variant|MODIFIER|EPlOSAG00000038653|EPlOSAG00000038653|transcript|EPlOSAT00000040041|lincRNA||n.*1290delT|||||1290|,C|intergenic_region|MODIFIER|OS01G0142500-EPlOSAG00000038653|OS01G0142500-EPlOSAG00000038653|intergenic_region|OS01G0142500-EPlOSAG00…
chr01	2291169	C	CCATGTCTCCG	291.19	0/0	0/0	1|1	0/0	0/0	./.	./.	./.	0/0	./.	0/0	./.	./.	0/0	0/0	0/0	0/0	0/0	0/0	./.	0/0	0/0	0/0	0/0	CCATGTCTCCG|upstream_gene_variant|MODIFIER|EPlOSAG00000038653|EPlOSAG00000038653|transcript|EPlOSAT00000040041|lincRNA||n.-23_-22insCGGAGACATG|||||23|,CCATGTCTCCG|upstream_gene_variant|MODIFIER|OS01G0142600|OS01G0142600|transcript|OS01T0142600-01|protein_coding||c.-2521_-2520insCATGTCTCCG|||||1069|,CCATGTCTCCG|downstream_gene_variant|MODIFIER|EPlOSAG00000038881|EPlOSAG00000038881|transcript|EPlOS…
chr01	2292586	CT	C	10703	0/0	0/0	1/1	0/0	0/0	1/1	1/1	1/1	0/0	1/1	0/0	1/1	1/1	0/0	0/0	0/0	0/0	0/0	0/0	1/1	0/0	0/0	0/0	0/0	C|5_prime_UTR_variant|MODIFIER|OS01G0142600|OS01G0142600|transcript|OS01T0142600-01|protein_coding|1/1|c.-1095delT|||||1095|INFO_REALIGN_3_PRIME,C|upstream_gene_variant|MODIFIER|EPlOSAG00000038653|EPlOSAG00000038653|transcript|EPlOSAT00000040041|lincRNA||n.-1440delA|||||1440|,C|downstream_gene_variant|MODIFIER|EPlOSAG00000038881|EPlOSAG00000038881|transcript|EPlOSAT00000040269|lincRNA||n.*1440del…
chr01	2298684	C	CTCAGTAACCTTGGGCCT,CTCAGTAACCTTG,CTCAGTAACCTTGG	2017.99	0/0	0/0	2/2	0/0	0/0	./.	./.	2/2	0/0	3/3	0/0	./.	1/1	0/0	0/0	0/0	0/0	0/0	0/0	2/2	0/0	0/0	0/0	0/0	CTCAGTAACCTTG|upstream_gene_variant|MODIFIER|OS01G0142875|OS01G0142875|transcript|OS01T0142875-00|protein_coding||c.-1142_-1141insCAAGGTTACTGA|||||735|,CTCAGTAACCTTGG|upstream_gene_variant|MODIFIER|OS01G0142875|OS01G0142875|transcript|OS01T0142875-00|protein_coding||c.-1142_-1141insCCAAGGTTACTGA|||||735|,CTCAGTAACCTTGGGCCT|upstream_gene_variant|MODIFIER|OS01G0142875|OS01G0142875|transcript|OS01T0…
chr01	2314717	TC	T	14834.9	0/0	0/0	1/1	0/0	0/0	1/1	1/1	1/1	0/0	1/1	0/0	1/1	1/1	0/0	0/0	0/0	0/0	0/0	0/0	1/1	0/0	0/0	0/0	0/0	T|intergenic_region|MODIFIER|EPlOSAG00000017152-EPlOSAG00000033763|EPlOSAG00000017152-EPlOSAG00000033763|intergenic_region|EPlOSAG00000017152-EPlOSAG00000033763|||n.2314718delC||||||
chr01	2318953	A	AAAAG	3424.64	0/0	0/0	1/1	0/0	0/0	1/1	1/1	./.	0/0	1/1	0/0	1/1	1/1	0/0	0/0	0/0	0/0	0/0	0/0	1/1	0/0	0/0	0/0	0/0	AAAAG|downstream_gene_variant|MODIFIER|EPlOSAG00000033763|EPlOSAG00000033763|transcript|EPlOSAT00000035151|lincRNA||n.*625_*626insAAAG|||||626|,AAAAG|intergenic_region|MODIFIER|EPlOSAG00000033763-EPlOSAG00000036665|EPlOSAG00000033763-EPlOSAG00000036665|intergenic_region|EPlOSAG00000033763-EPlOSAG00000036665|||n.2318953_2318954insAAAG||||||
chr01	2319381	GGTAAAAA	G	14675.8	0/0	0/0	1|1	0/0	0/0	1/1	1|1	1|1	0/0	1|1	0/0	1/1	1|1	0/0	0/0	0/0	0/0	0/0	0/0	./.	0/0	0/0	0/0	0/0	G|downstream_gene_variant|MODIFIER|EPlOSAG00000033763|EPlOSAG00000033763|transcript|EPlOSAT00000035151|lincRNA||n.*1054_*1060delGTAAAAA|||||1054|,G|intergenic_region|MODIFIER|EPlOSAG00000033763-EPlOSAG00000036665|EPlOSAG00000033763-EPlOSAG00000036665|intergenic_region|EPlOSAG00000033763-EPlOSAG00000036665|||n.2319382_2319388delGTAAAAA||||||
chr01	2319391	ACCATTCTCTT	A	13582.8	0/0	0/0	1|1	0/0	0/0	1/1	1|1	1|1	0/0	1|1	0/0	1/1	1|1	0/0	0/0	0/0	0/0	0/0	0/0	1/1	0/0	0/0	0/0	0/0	A|downstream_gene_variant|MODIFIER|EPlOSAG00000033763|EPlOSAG00000033763|transcript|EPlOSAT00000035151|lincRNA||n.*1064_*1073delCCATTCTCTT|||||1064|,A|intergenic_region|MODIFIER|EPlOSAG00000033763-EPlOSAG00000036665|EPlOSAG00000033763-EPlOSAG00000036665|intergenic_region|EPlOSAG00000033763-EPlOSAG00000036665|||n.2319392_2319401delCCATTCTCTT||||||
chr01	2320618	GA	G	7652.94	0/0	0/0	1/1	0/0	0/0	1/1	1/1	1/1	0/0	1/1	0/0	1/1	1/1	0/0	0/0	0/0	0/0	0/0	0/0	1/1	0/0	0/0	0/0	0/0	G|intergenic_region|MODIFIER|EPlOSAG00000033763-EPlOSAG00000036665|EPlOSAG00000033763-EPlOSAG00000036665|intergenic_region|EPlOSAG00000033763-EPlOSAG00000036665|||n.2320619delA||||||
chr01	2320809	A	AT	7016.95	0/0	0/0	1/1	0/0	0/0	1/1	1/1	1/1	0/0	1/1	0/0	1/1	1/1	0/0	0/0	0/0	0/0	0/0	0/0	1/1	0/0	0/0	0/0	0/0	AT|intergenic_region|MODIFIER|EPlOSAG00000033763-EPlOSAG00000036665|EPlOSAG00000033763-EPlOSAG00000036665|intergenic_region|EPlOSAG00000033763-EPlOSAG00000036665|||n.2320809_2320810insT||||||
chr01	2321116	CA	C	7324.94	0/0	0/0	1/1	0/0	0/0	1/1	1/1	1/1	0/0	1/1	0/0	1/1	1/1	0/0	0/0	0/0	0/0	0/0	0/0	1/1	0/0	0/0	0/0	0/0	C|intergenic_region|MODIFIER|EPlOSAG00000033763-EPlOSAG00000036665|EPlOSAG00000033763-EPlOSAG00000036665|intergenic_region|EPlOSAG00000033763-EPlOSAG00000036665|||n.2321117delA||||||
chr01	2324178	T	TAAAATTC	19087	0/0	0/0	1/1	0/0	0/0	1/1	1/1	1/1	0/0	1/1	0/0	1/1	1/1	0/0	0/0	0/0	0/0	0/0	0/0	1/1	0/0	0/0	0/0	0/0	TAAAATTC|downstream_gene_variant|MODIFIER|EPlOSAG00000051987|EPlOSAG00000051987|transcript|EPlOSAT00000000913|lincRNA||n.*10_*11insGAATTTT|||||10|,TAAAATTC|non_coding_transcript_exon_variant|MODIFIER|EPlOSAG00000036665|EPlOSAG00000036665|transcript|EPlOSAT00000038053|lincRNA|1/1|n.21_22insAATTCAA||||||INFO_REALIGN_3_PRIME
chr01	2325164	T	TA	6226.98	0/0	0/0	1/1	0/0	0/0	1/1	1/1	1/1	0/0	1/1	0/0	1/1	1/1	0/0	0/0	0/0	0/0	0/0	0/0	1/1	0/0	0/0	0/0	0/0	TA|upstream_gene_variant|MODIFIER|EPlOSAG00000051987|EPlOSAG00000051987|transcript|EPlOSAT00000000913|lincRNA||n.-887_-886insT|||||887|,TA|downstream_gene_variant|MODIFIER|EPlOSAG00000036665|EPlOSAG00000036665|transcript|EPlOSAT00000038053|lincRNA||n.*943_*944insA|||||944|,TA|intergenic_region|MODIFIER|EPlOSAG00000051987-EPlOSAG00000020336|EPlOSAG00000051987-EPlOSAG00000020336|intergenic_region|E…
chr01	2325230	T	TA	7526.98	0/0	0/0	1/1	0/0	0/0	1/1	1/1	1/1	0/0	1/1	0/0	1/1	1/1	0/0	0/0	0/0	0/0	0/0	0/0	1/1	0/0	0/0	0/0	0/0	TA|upstream_gene_variant|MODIFIER|EPlOSAG00000051987|EPlOSAG00000051987|transcript|EPlOSAT00000000913|lincRNA||n.-953_-952insT|||||953|,TA|downstream_gene_variant|MODIFIER|EPlOSAG00000036665|EPlOSAG00000036665|transcript|EPlOSAT00000038053|lincRNA||n.*1009_*1010insA|||||1010|,TA|intergenic_region|MODIFIER|EPlOSAG00000051987-EPlOSAG00000020336|EPlOSAG00000051987-EPlOSAG00000020336|intergenic_regio…
chr01	2326045	TC	T	16121.9	0/0	0/0	1/1	0/0	0/0	1/1	1/1	1/1	0/0	1/1	0/0	1/1	1/1	0/0	0/0	0/0	0/0	0/0	0/0	1/1	0/0	0/0	0/0	0/0	T|upstream_gene_variant|MODIFIER|EPlOSAG00000051987|EPlOSAG00000051987|transcript|EPlOSAT00000000913|lincRNA||n.-1768delG|||||1768|,T|downstream_gene_variant|MODIFIER|EPlOSAG00000036665|EPlOSAG00000036665|transcript|EPlOSAT00000038053|lincRNA||n.*1825delC|||||1825|,T|downstream_gene_variant|MODIFIER|EPlOSAG00000020336|EPlOSAG00000020336|transcript|EPlOSAT00000021724|lincRNA||n.*1782delG|||||1782|…
chr01	2326958	C	CT	9404.45	0/0	0/0	1/1	0/0	0/0	1/1	1/1	1/1	0/0	1/1	0/0	1/1	1/1	0/0	0/0	0/0	0/0	0/0	0/0	./.	0/0	0/0	0/0	0/0	CT|downstream_gene_variant|MODIFIER|EPlOSAG00000020336|EPlOSAG00000020336|transcript|EPlOSAT00000021724|lincRNA||n.*869_*870insA|||||869|,CT|intergenic_region|MODIFIER|EPlOSAG00000051987-EPlOSAG00000020336|EPlOSAG00000051987-EPlOSAG00000020336|intergenic_region|EPlOSAG00000051987-EPlOSAG00000020336|||n.2326958_2326959insT||||||
chr01	2327433	ATT	A	18474.9	0/0	0/0	1/1	0/0	0/0	1/1	1/1	1/1	0/0	1/1	0/0	1/1	1/1	0/0	0/0	0/0	0/0	0/0	0/0	1/1	0/0	0/0	0/0	0/0	A|downstream_gene_variant|MODIFIER|EPlOSAG00000020336|EPlOSAG00000020336|transcript|EPlOSAT00000021724|lincRNA||n.*393_*394delAA|||||394|,A|intergenic_region|MODIFIER|EPlOSAG00000051987-EPlOSAG00000020336|EPlOSAG00000051987-EPlOSAG00000020336|intergenic_region|EPlOSAG00000051987-EPlOSAG00000020336|||n.2327434_2327435delTT||||||
chr01	2327785	A	ACTTTTTTAAGTGCTT	19572	0/0	0/0	1/1	0/0	0/0	1/1	1/1	1/1	0/0	1/1	0/0	1/1	1/1	0/0	0/0	0/0	0/0	0/0	0/0	1/1	0/0	0/0	0/0	0/0	ACTTTTTTAAGTGCTT|downstream_gene_variant|MODIFIER|EPlOSAG00000020336|EPlOSAG00000020336|transcript|EPlOSAT00000021724|lincRNA||n.*42_*43insAAGCACTTAAAAAAG|||||42|,ACTTTTTTAAGTGCTT|intergenic_region|MODIFIER|EPlOSAG00000051987-EPlOSAG00000020336|EPlOSAG00000051987-EPlOSAG00000020336|intergenic_region|EPlOSAG00000051987-EPlOSAG00000020336|||n.2327785_2327786insCTTTTTTAAGTGCTT||||||
chr01	2333434	GAT	G	17291.9	0/0	0/0	1/1	0/0	0/0	1/1	1/1	1/1	0/0	1/1	0/0	1/1	1/1	0/0	0/0	0/0	0/0	0/0	0/0	1/1	0/0	0/0	0/0	0/0	G|intergenic_region|MODIFIER|EPlOSAG00000020336-OS01G0142950|EPlOSAG00000020336-OS01G0142950|intergenic_region|EPlOSAG00000020336-OS01G0142950|||n.2333435_2333436delAT||||||
chr01	2333955	CTA	C	17187.9	0/0	0/0	1/1	0/0	0/0	1/1	1/1	1/1	0/0	1/1	0/0	1/1	1/1	0/0	0/0	0/0	0/0	0/0	0/0	1/1	0/0	0/0	0/0	0/0	C|intergenic_region|MODIFIER|EPlOSAG00000020336-OS01G0142950|EPlOSAG00000020336-OS01G0142950|intergenic_region|EPlOSAG00000020336-OS01G0142950|||n.2333956_2333957delTA||||||
chr01	2334493	TA	T	10510.9	0/0	0/0	1/1	0/0	0/0	1/1	1/1	1/1	0/0	1/1	0/0	1/1	1/1	0/0	0/0	0/0	0/0	0/0	0/0	1/1	0/0	0/0	0/0	0/0	T|intergenic_region|MODIFIER|EPlOSAG00000020336-OS01G0142950|EPlOSAG00000020336-OS01G0142950|intergenic_region|EPlOSAG00000020336-OS01G0142950|||n.2334494delA||||||
chr01	2334563	GATT	G	4424.7	0/0	0/0	./.	0/0	0/0	1/1	1/1	1/1	0/0	1/1	0/0	./.	1/1	0/0	0/0	0/0	0/0	0/0	0/0	./.	0/0	0/0	0/0	0/0	G|intergenic_region|MODIFIER|EPlOSAG00000020336-OS01G0142950|EPlOSAG00000020336-OS01G0142950|intergenic_region|EPlOSAG00000020336-OS01G0142950|||n.2334564_2334566delATT||||||
chr01	2334622	A	AT	3417.52	0/0	0/0	./.	0/0	0/0	./.	1|1	1|1	0/0	1|1	0/0	./.	1|1	0/0	0/0	0/0	0/0	0/0	0/0	./.	0/0	0/0	0/0	0/0	AT|intergenic_region|MODIFIER|EPlOSAG00000020336-OS01G0142950|EPlOSAG00000020336-OS01G0142950|intergenic_region|EPlOSAG00000020336-OS01G0142950|||n.2334622_2334623insT||||||
chr01	2334681	TGACTCA	T	9889.94	0/0	0/0	1|1	0/0	0/0	1|1	1|1	1|1	0/0	1|1	0/0	1|1	1|1	0/0	0/0	0/0	0/0	0/0	0/0	1|1	0/0	0/0	0/0	0/0	T|intergenic_region|MODIFIER|EPlOSAG00000020336-OS01G0142950|EPlOSAG00000020336-OS01G0142950|intergenic_region|EPlOSAG00000020336-OS01G0142950|||n.2334682_2334687delGACTCA||||||
chr01	2335334	AT	A	8429.94	0/0	0/0	1/1	0/0	0/0	1/1	1/1	1/1	0/0	1/1	0/0	1/1	1/1	0/0	0/0	0/0	0/0	0/0	0/0	1/1	0/0	0/0	0/0	0/0	A|intergenic_region|MODIFIER|EPlOSAG00000020336-OS01G0142950|EPlOSAG00000020336-OS01G0142950|intergenic_region|EPlOSAG00000020336-OS01G0142950|||n.2335335delT||||||
chr01	2335416	TG	T	11296.9	0/0	0/0	1/1	0/0	0/0	1/1	1/1	1/1	0/0	1/1	0/0	1/1	1/1	0/0	0/0	0/0	0/0	0/0	0/0	1/1	0/0	0/0	0/0	0/0	T|intergenic_region|MODIFIER|EPlOSAG00000020336-OS01G0142950|EPlOSAG00000020336-OS01G0142950|intergenic_region|EPlOSAG00000020336-OS01G0142950|||n.2335417delG||||||
chr01	2335555	CAAGGTCTATAACGACGCAGATCAAAGG	C	7337.94	0/0	0/0	1|1	0/0	0/0	1|1	1|1	1|1	0/0	1|1	0/0	1|1	1|1	0/0	0/0	0/0	0/0	0/0	0/0	1|1	0/0	0/0	0/0	0/0	C|intergenic_region|MODIFIER|EPlOSAG00000020336-OS01G0142950|EPlOSAG00000020336-OS01G0142950|intergenic_region|EPlOSAG00000020336-OS01G0142950|||n.2335556_2335582delAAGGTCTATAACGACGCAGATCAAAGG||||||
chr01	2335619	T	TCTC	530.53	0/0	0/0	./.	0/0	0/0	./.	./.	1|1	0/0	./.	0/0	./.	./.	0/0	0/0	0/0	0/0	0/0	0/0	./.	0/0	0/0	0/0	0/0	TCTC|intergenic_region|MODIFIER|EPlOSAG00000020336-OS01G0142950|EPlOSAG00000020336-OS01G0142950|intergenic_region|EPlOSAG00000020336-OS01G0142950|||n.2335619_2335620insCTC||||||
chr01	2335623	C	CCAATGGCCGCCGCTGCT	381.46	0/0	0/0	./.	0/0	0/0	./.	./.	1|1	0/0	./.	0/0	./.	./.	0/0	0/0	0/0	0/0	0/0	0/0	./.	0/0	0/0	0/0	0/0	CCAATGGCCGCCGCTGCT|intergenic_region|MODIFIER|EPlOSAG00000020336-OS01G0142950|EPlOSAG00000020336-OS01G0142950|intergenic_region|EPlOSAG00000020336-OS01G0142950|||n.2335623_2335624insCAATGGCCGCCGCTGCT||||||
chr01	2341941	TATTA	T	17797.9	0/0	0/0	1|1	0/0	0/0	1|1	1|1	1|1	0/0	1|1	0/0	1|1	1|1	0/0	0/0	0/0	0/0	0/0	0/0	1|1	0/0	0/0	0/0	0/0	T|5_prime_UTR_variant|MODIFIER|OS01G0142950|OS01G0142950|transcript|OS01T0142950-01|protein_coding|1/1|c.-2178_-2175delTAAT|||||2175|WARNING_TRANSCRIPT_NO_START_CODON,T|downstream_gene_variant|MODIFIER|EPlOSAG00000048930|EPlOSAG00000048930|transcript|EPlOSAT00000050318|lincRNA||n.*635_*638delATTA|||||635|
chr01	2341946	T	TC	17438	0/0	0/0	1|1	0/0	0/0	1|1	1|1	1|1	0/0	1|1	0/0	1|1	1|1	0/0	0/0	0/0	0/0	0/0	0/0	1|1	0/0	0/0	0/0	0/0	TC|5_prime_UTR_variant|MODIFIER|OS01G0142950|OS01G0142950|transcript|OS01T0142950-01|protein_coding|1/1|c.-2180_-2179insG|||||2180|WARNING_TRANSCRIPT_NO_START_CODON,TC|downstream_gene_variant|MODIFIER|EPlOSAG00000048930|EPlOSAG00000048930|transcript|EPlOSAT00000050318|lincRNA||n.*639_*640insC|||||640|
chr01	2341957	CG	C	17886.9	0/0	0/0	1|1	0/0	0/0	1|1	1|1	1|1	0/0	1|1	0/0	1|1	1|1	0/0	0/0	0/0	0/0	0/0	0/0	1|1	0/0	0/0	0/0	0/0	C|5_prime_UTR_variant|MODIFIER|OS01G0142950|OS01G0142950|transcript|OS01T0142950-01|protein_coding|1/1|c.-2191delC|||||2191|WARNING_TRANSCRIPT_NO_START_CODON,C|downstream_gene_variant|MODIFIER|EPlOSAG00000048930|EPlOSAG00000048930|transcript|EPlOSAT00000050318|lincRNA||n.*651delG|||||651|
chr01	2344087	AACAG	A	11556.9	0/0	0/0	1|1	0/0	0/0	1|1	1|1	1|1	0/0	1|1	0/0	1/1	1|1	0/0	0/0	0/0	0/0	0/0	0/0	1|1	0/0	0/0	0/0	0/0	A|intergenic_region|MODIFIER|OS01G0142950-EPlOSAG00000021001|OS01G0142950-EPlOSAG00000021001|intergenic_region|OS01G0142950-EPlOSAG00000021001|||n.2344088_2344091delACAG||||||
chr01	2344093	TGTCATTCAGCCATGGCAGGTCGGCAGCTCAACGGCGA	T	11866.9	0/0	0/0	1|1	0/0	0/0	1|1	1|1	1|1	0/0	1|1	0/0	1/1	1|1	0/0	0/0	0/0	0/0	0/0	0/0	1|1	0/0	0/0	0/0	0/0	T|intergenic_region|MODIFIER|OS01G0142950-EPlOSAG00000021001|OS01G0142950-EPlOSAG00000021001|intergenic_region|OS01G0142950-EPlOSAG00000021001|||n.2344094_2344130delGTCATTCAGCCATGGCAGGTCGGCAGCTCAACGGCGA||||||
chr01	2344403	G	GACAACATAGATTA	18642	0/0	0/0	1/1	0/0	0/0	1/1	1/1	1/1	0/0	1/1	0/0	1/1	1/1	0/0	0/0	0/0	0/0	0/0	0/0	1/1	0/0	0/0	0/0	0/0	GACAACATAGATTA|downstream_gene_variant|MODIFIER|EPlOSAG00000021001|EPlOSAG00000021001|transcript|EPlOSAT00000022389|lincRNA||n.*1746_*1747insTAATCTATGTTGT|||||1746|,GACAACATAGATTA|intergenic_region|MODIFIER|OS01G0142950-EPlOSAG00000021001|OS01G0142950-EPlOSAG00000021001|intergenic_region|OS01G0142950-EPlOSAG00000021001|||n.2344403_2344404insACAACATAGATTA||||||
chr01	2344530	A	AT	10541	0/0	0/0	1/1	0/0	0/0	1/1	1/1	1/1	0/0	1/1	0/0	1/1	1/1	0/0	0/0	0/0	0/0	0/0	0/0	1/1	0/0	0/0	0/0	0/0	AT|downstream_gene_variant|MODIFIER|EPlOSAG00000021001|EPlOSAG00000021001|transcript|EPlOSAT00000022389|lincRNA||n.*1619_*1620insA|||||1619|,AT|intergenic_region|MODIFIER|OS01G0142950-EPlOSAG00000021001|OS01G0142950-EPlOSAG00000021001|intergenic_region|OS01G0142950-EPlOSAG00000021001|||n.2344530_2344531insT||||||
chr01	2360490	T	TA	9975.06	0/0	0/0	1/1	0/0	0/0	1/1	1/1	1/1	0/0	1/1	0/0	1/1	1/1	0/0	0/0	0/0	0/0	0/0	0/0	1/1	0/0	0/0	0/0	0/0	TA|upstream_gene_variant|MODIFIER|OS01G0143300|OS01G0143300|transcript|OS01T0143300-01|protein_coding||c.-120_-119insT|||||54|,TA|downstream_gene_variant|MODIFIER|OS01G0143350|OS01G0143350|transcript|OS01T0143350-00|protein_coding||c.*97_*98insA|||||98|WARNING_TRANSCRIPT_NO_STOP_CODON,TA|downstream_gene_variant|MODIFIER|EPlOSAG00000004044|EPlOSAG00000004044|transcript|EPlOSAT00000005432|lincRNA||…
chr01	2360927	G	GT	9314.98	0/0	0/0	1/1	0/0	0/0	1/1	1/1	1/1	0/0	1/1	0/0	1/1	1/1	0/0	0/0	0/0	0/0	0/0	0/0	1/1	0/0	0/0	0/0	0/0	GT|upstream_gene_variant|MODIFIER|OS01G0143300|OS01G0143300|transcript|OS01T0143300-01|protein_coding||c.-557_-556insA|||||491|,GT|downstream_gene_variant|MODIFIER|OS01G0143350|OS01G0143350|transcript|OS01T0143350-00|protein_coding||c.*534_*535insT|||||535|WARNING_TRANSCRIPT_NO_STOP_CODON,GT|downstream_gene_variant|MODIFIER|OS01G0143400|OS01G0143400|transcript|OS01T0143400-00|protein_coding||c.*8…
chr01	2364611	CT	C	115.85	0/0	0/0	0/0	0/0	0/0	0/0	0/0	0/0	0/0	0/0	0/0	0/0	1/1	0/0	0/0	0/0	0/0	0/0	0/0	0/0	0/0	0/0	0/0	0/0	C|upstream_gene_variant|MODIFIER|OS01G0143400|OS01G0143400|transcript|OS01T0143400-00|protein_coding||c.-798delA|||||798|,C|intergenic_region|MODIFIER|OS01G0143400-EPlOSAG00000015626|OS01G0143400-EPlOSAG00000015626|intergenic_region|OS01G0143400-EPlOSAG00000015626|||n.2364612delT||||||
chr01	2368019	CCGCCGTGGTGG	C	17089	0/0	0/0	1/1	0/0	0/0	1/1	1/1	1/1	0/0	1/1	0/0	1/1	1/1	0/0	0/0	0/0	0/0	0/0	0/0	1/1	0/0	0/0	0/0	0/0	C|upstream_gene_variant|MODIFIER|EPlOSAG00000015626|EPlOSAG00000015626|transcript|EPlOSAT00000017014|lincRNA||n.-1247_-1237delCGCCGTGGTGG|||||1247|,C|intergenic_region|MODIFIER|OS01G0143400-EPlOSAG00000015626|OS01G0143400-EPlOSAG00000015626|intergenic_region|OS01G0143400-EPlOSAG00000015626|||n.2368020_2368030delCGCCGTGGTGG||||||
chr01	2368953	C	CA	7851.64	0/0	0/0	1/1	0/0	0/0	1/1	1/1	1/1	0/0	1/1	0/0	1/1	1/1	0/0	0/0	0/0	0/0	0/0	0/0	1/1	0/0	0/0	0/0	0/0	CA|upstream_gene_variant|MODIFIER|EPlOSAG00000015626|EPlOSAG00000015626|transcript|EPlOSAT00000017014|lincRNA||n.-314_-313insA|||||313|,CA|intergenic_region|MODIFIER|OS01G0143400-EPlOSAG00000015626|OS01G0143400-EPlOSAG00000015626|intergenic_region|OS01G0143400-EPlOSAG00000015626|||n.2368953_2368954insA||||||
chr01	2369150	A	AC	13334	0/0	0/0	1/1	0/0	0/0	1/1	1/1	1/1	0/0	1/1	0/0	1/1	1/1	0/0	0/0	0/0	0/0	0/0	0/0	1/1	0/0	0/0	0/0	0/0	AC|upstream_gene_variant|MODIFIER|EPlOSAG00000015626|EPlOSAG00000015626|transcript|EPlOSAT00000017014|lincRNA||n.-117_-116insC|||||116|,AC|intergenic_region|MODIFIER|OS01G0143400-EPlOSAG00000015626|OS01G0143400-EPlOSAG00000015626|intergenic_region|OS01G0143400-EPlOSAG00000015626|||n.2369150_2369151insC||||||
chr01	2369532	G	GA	503.52	0/0	0/0	1|1	0/0	0/0	./.	./.	./.	0/0	./.	0/0	./.	./.	0/0	0/0	0/0	0/0	0/0	0/0	./.	0/0	0/0	0/0	0/0	GA|downstream_gene_variant|MODIFIER|EPlOSAG00000015626|EPlOSAG00000015626|transcript|EPlOSAT00000017014|lincRNA||n.*203_*204insA|||||204|,GA|intergenic_region|MODIFIER|EPlOSAG00000015626-EPlOSAG00000044528|EPlOSAG00000015626-EPlOSAG00000044528|intergenic_region|EPlOSAG00000015626-EPlOSAG00000044528|||n.2369532_2369533insA||||||
chr01	2369533	A	AATCAACGAGGTACACGGCGATCCT	358.46	0/0	0/0	0/0	0/0	0/0	./.	./.	./.	0/0	./.	0/0	./.	1/1	0/0	0/0	0/0	0/0	0/0	0/0	./.	0/0	0/0	0/0	0/0	AATCAACGAGGTACACGGCGATCCT|downstream_gene_variant|MODIFIER|EPlOSAG00000015626|EPlOSAG00000015626|transcript|EPlOSAT00000017014|lincRNA||n.*204_*205insATCAACGAGGTACACGGCGATCCT|||||205|,AATCAACGAGGTACACGGCGATCCT|intergenic_region|MODIFIER|EPlOSAG00000015626-EPlOSAG00000044528|EPlOSAG00000015626-EPlOSAG00000044528|intergenic_region|EPlOSAG00000015626-EPlOSAG00000044528|||n.2369533_2369534insATCAACGA…
chr01	2369536	A	AAC	508.53	0/0	0/0	1|1	0/0	0/0	./.	./.	./.	0/0	./.	0/0	./.	./.	0/0	0/0	0/0	0/0	0/0	0/0	./.	0/0	0/0	0/0	0/0	AAC|downstream_gene_variant|MODIFIER|EPlOSAG00000015626|EPlOSAG00000015626|transcript|EPlOSAT00000017014|lincRNA||n.*207_*208insAC|||||208|,AAC|intergenic_region|MODIFIER|EPlOSAG00000015626-EPlOSAG00000044528|EPlOSAG00000015626-EPlOSAG00000044528|intergenic_region|EPlOSAG00000015626-EPlOSAG00000044528|||n.2369536_2369537insAC||||||
chr01	2369537	G	GA	471.52	0/0	0/0	1|1	0/0	0/0	./.	./.	./.	0/0	./.	0/0	./.	./.	0/0	0/0	0/0	0/0	0/0	0/0	./.	0/0	0/0	0/0	0/0	GA|downstream_gene_variant|MODIFIER|EPlOSAG00000015626|EPlOSAG00000015626|transcript|EPlOSAT00000017014|lincRNA||n.*208_*209insA|||||209|,GA|intergenic_region|MODIFIER|EPlOSAG00000015626-EPlOSAG00000044528|EPlOSAG00000015626-EPlOSAG00000044528|intergenic_region|EPlOSAG00000015626-EPlOSAG00000044528|||n.2369537_2369538insA||||||
chr01	2369539	G	GTA	471.52	0/0	0/0	1|1	0/0	0/0	./.	./.	./.	0/0	./.	0/0	./.	./.	0/0	0/0	0/0	0/0	0/0	0/0	./.	0/0	0/0	0/0	0/0	GTA|downstream_gene_variant|MODIFIER|EPlOSAG00000015626|EPlOSAG00000015626|transcript|EPlOSAT00000017014|lincRNA||n.*210_*211insTA|||||211|,GTA|intergenic_region|MODIFIER|EPlOSAG00000015626-EPlOSAG00000044528|EPlOSAG00000015626-EPlOSAG00000044528|intergenic_region|EPlOSAG00000015626-EPlOSAG00000044528|||n.2369539_2369540insTA||||||
chr01	2369540	C	CA	471.52	0/0	0/0	1|1	0/0	0/0	./.	./.	./.	0/0	./.	0/0	./.	./.	0/0	0/0	0/0	0/0	0/0	0/0	./.	0/0	0/0	0/0	0/0	CA|downstream_gene_variant|MODIFIER|EPlOSAG00000015626|EPlOSAG00000015626|transcript|EPlOSAT00000017014|lincRNA||n.*211_*212insA|||||212|,CA|intergenic_region|MODIFIER|EPlOSAG00000015626-EPlOSAG00000044528|EPlOSAG00000015626-EPlOSAG00000044528|intergenic_region|EPlOSAG00000015626-EPlOSAG00000044528|||n.2369540_2369541insA||||||
chr01	2369544	C	CGAT	426.49	0/0	0/0	1|1	0/0	0/0	./.	./.	./.	0/0	./.	0/0	./.	./.	0/0	0/0	0/0	0/0	0/0	0/0	./.	0/0	0/0	0/0	0/0	CGAT|downstream_gene_variant|MODIFIER|EPlOSAG00000015626|EPlOSAG00000015626|transcript|EPlOSAT00000017014|lincRNA||n.*215_*216insGAT|||||216|,CGAT|intergenic_region|MODIFIER|EPlOSAG00000015626-EPlOSAG00000044528|EPlOSAG00000015626-EPlOSAG00000044528|intergenic_region|EPlOSAG00000015626-EPlOSAG00000044528|||n.2369544_2369545insGAT||||||
chr01	2369546	C	CT	426.49	0/0	0/0	1|1	0/0	0/0	./.	./.	./.	0/0	./.	0/0	./.	./.	0/0	0/0	0/0	0/0	0/0	0/0	./.	0/0	0/0	0/0	0/0	CT|downstream_gene_variant|MODIFIER|EPlOSAG00000015626|EPlOSAG00000015626|transcript|EPlOSAT00000017014|lincRNA||n.*217_*218insT|||||218|,CT|intergenic_region|MODIFIER|EPlOSAG00000015626-EPlOSAG00000044528|EPlOSAG00000015626-EPlOSAG00000044528|intergenic_region|EPlOSAG00000015626-EPlOSAG00000044528|||n.2369546_2369547insT||||||
chr01	2370445	GGTACGACTCGAGGAAGATGTACCAGACAATGACCAAGCGGGTGACAAGGAGGTCGAGATTAAAGCCATGGATAAGGATGTTGTTGGCAGCGTTGCTGCCAATGGGACCT	G	7726.58	0/0	0/0	1/1	0/0	0/0	1/1	1/1	1/1	0/0	1/1	0/0	1/1	1/1	1/1	0/0	0/0	0/0	0/0	0/0	1/1	0/0	0/0	0/0	0/0	G|upstream_gene_variant|MODIFIER|OS01G0143750|OS01G0143750|transcript|OS01T0143750-00|protein_coding||c.-1944_-1836del|||||1890|,G|downstream_gene_variant|MODIFIER|EPlOSAG00000015626|EPlOSAG00000015626|transcript|EPlOSAT00000017014|lincRNA||n.*1117_*1225del|||||1117|,G|downstream_gene_variant|MODIFIER|EPlOSAG00000044528|EPlOSAG00000044528|transcript|EPlOSAT00000045916|lincRNA||n.*1464_*1572del|||…
chr01	2370829	A	AGCATCCTGAAGAGGGCGAAGGAGAGGCATAGGTCCCGCCGCCACGATCCCCGCCATCGCCACTCAACCTCAACTGCAGCAGCTTCC	17377.6	0/0	0/0	1|1	0/0	0/0	1|1	1|1	1|1	0/0	1|1	0/0	1|1	1|1	1|1	0/0	0/0	0/0	0/0	0/0	1|1	0/0	0/0	0/0	0/0	AGCATCCTGAAGAGGGCGAAGGAGAGGCATAGGTCCCGCCGCCACGATCCCCGCCATCGCCACTCAACCTCAACTGCAGCAGCTTCC|upstream_gene_variant|MODIFIER|OS01G0143750|OS01G0143750|transcript|OS01T0143750-00|protein_coding||c.-1561_-1560insGCATCCTGAAGAGGGCGAAGGAGAGGCATAGGTCCCGCCGCCACGATCCCCGCCATCGCCACTCAACCTCAACTGCAGCAGCTTCC|||||1506|,AGCATCCTGAAGAGGGCGAAGGAGAGGCATAGGTCCCGCCGCCACGATCCCCGCCATCGCCACTCAACCTCAACTGCAGCAGCTTCC|downstream…
chr01	2370832	TG	T	12042.6	0/0	0/0	1|1	0/0	0/0	1|1	1|1	1|1	0/0	1|1	0/0	1|1	1|1	1|1	0/0	0/0	0/0	0/0	0/0	1|1	0/0	0/0	0/0	0/0	T|upstream_gene_variant|MODIFIER|OS01G0143750|OS01G0143750|transcript|OS01T0143750-00|protein_coding||c.-1557delG|||||1503|,T|downstream_gene_variant|MODIFIER|EPlOSAG00000015626|EPlOSAG00000015626|transcript|EPlOSAT00000017014|lincRNA||n.*1504delG|||||1504|,T|downstream_gene_variant|MODIFIER|EPlOSAG00000044528|EPlOSAG00000044528|transcript|EPlOSAT00000045916|lincRNA||n.*1185delC|||||1185|,T|downs…
chr01	2370835	G	GCATT	13482.6	0/0	0/0	1|1	0/0	0/0	1|1	1|1	1|1	0/0	1|1	0/0	1|1	1|1	1|1	0/0	0/0	0/0	0/0	0/0	1|1	0/0	0/0	0/0	0/0	GCATT|upstream_gene_variant|MODIFIER|OS01G0143750|OS01G0143750|transcript|OS01T0143750-00|protein_coding||c.-1555_-1554insCATT|||||1500|,GCATT|downstream_gene_variant|MODIFIER|EPlOSAG00000015626|EPlOSAG00000015626|transcript|EPlOSAT00000017014|lincRNA||n.*1506_*1507insCATT|||||1507|,GCATT|downstream_gene_variant|MODIFIER|EPlOSAG00000044528|EPlOSAG00000044528|transcript|EPlOSAT00000045916|lincRNA|…
chr01	2370839	A	AAAC	14085.6	0/0	0/0	1|1	0/0	0/0	1|1	1|1	1|1	0/0	1|1	0/0	1|1	1|1	1|1	0/0	0/0	0/0	0/0	0/0	1|1	0/0	0/0	0/0	0/0	AAAC|upstream_gene_variant|MODIFIER|OS01G0143750|OS01G0143750|transcript|OS01T0143750-00|protein_coding||c.-1551_-1550insAAC|||||1496|,AAAC|downstream_gene_variant|MODIFIER|EPlOSAG00000015626|EPlOSAG00000015626|transcript|EPlOSAT00000017014|lincRNA||n.*1510_*1511insAAC|||||1511|,AAAC|downstream_gene_variant|MODIFIER|EPlOSAG00000044528|EPlOSAG00000044528|transcript|EPlOSAT00000045916|lincRNA||n.*1…
chr01	2370942	C	CTCCATT	26127.6	0/0	0/0	1|1	0/0	0/0	1|1	1|1	1|1	0/0	1|1	0/0	1|1	1|1	1|1	0/0	0/0	0/0	0/0	0/0	1/1	0/0	0/0	0/0	0/0	CTCCATT|upstream_gene_variant|MODIFIER|OS01G0143750|OS01G0143750|transcript|OS01T0143750-00|protein_coding||c.-1448_-1447insTCCATT|||||1393|,CTCCATT|downstream_gene_variant|MODIFIER|EPlOSAG00000015626|EPlOSAG00000015626|transcript|EPlOSAT00000017014|lincRNA||n.*1613_*1614insTCCATT|||||1614|,CTCCATT|downstream_gene_variant|MODIFIER|EPlOSAG00000044528|EPlOSAG00000044528|transcript|EPlOSAT0000004591…
chr01	2370943	G	GTTTTGGGGTCAT	26109.6	0/0	0/0	1|1	0/0	0/0	1|1	1|1	1|1	0/0	1|1	0/0	1|1	1|1	1|1	0/0	0/0	0/0	0/0	0/0	1/1	0/0	0/0	0/0	0/0	GTTTTGGGGTCAT|upstream_gene_variant|MODIFIER|OS01G0143750|OS01G0143750|transcript|OS01T0143750-00|protein_coding||c.-1447_-1446insTTTTGGGGTCAT|||||1392|,GTTTTGGGGTCAT|downstream_gene_variant|MODIFIER|EPlOSAG00000015626|EPlOSAG00000015626|transcript|EPlOSAT00000017014|lincRNA||n.*1614_*1615insTTTTGGGGTCAT|||||1615|,GTTTTGGGGTCAT|downstream_gene_variant|MODIFIER|EPlOSAG00000044528|EPlOSAG0000004452…
chr01	2371195	CTCG	C	23824.6	0/0	0/0	1/1	0/0	0/0	1/1	1/1	1/1	0/0	1/1	0/0	1/1	1/1	1/1	0/0	0/0	0/0	0/0	0/0	1/1	0/0	0/0	0/0	0/0	C|upstream_gene_variant|MODIFIER|OS01G0143750|OS01G0143750|transcript|OS01T0143750-00|protein_coding||c.-1194_-1192delTCG|||||1140|,C|downstream_gene_variant|MODIFIER|EPlOSAG00000015626|EPlOSAG00000015626|transcript|EPlOSAT00000017014|lincRNA||n.*1867_*1869delTCG|||||1867|,C|downstream_gene_variant|MODIFIER|EPlOSAG00000044528|EPlOSAG00000044528|transcript|EPlOSAT00000045916|lincRNA||n.*820_*822de…
chr01	2374169	TATGGAAAAAAAA	T	24064.6	0/0	0/0	1/1	0/0	0/0	1/1	1/1	1/1	0/0	1/1	0/0	1/1	1/1	1/1	0/0	0/0	0/0	0/0	0/0	1/1	0/0	0/0	0/0	0/0	T|upstream_gene_variant|MODIFIER|EPlOSAG00000044528|EPlOSAG00000044528|transcript|EPlOSAT00000045916|lincRNA||n.-1960_-1949delTTTTTTTTCCAT|||||1949|,T|upstream_gene_variant|MODIFIER|OS01G0143700|OS01G0143700|transcript|OS01T0143700-00|protein_coding||c.-115_-104delTTTTTTTTCCAT|||||104|,T|downstream_gene_variant|MODIFIER|OS01G0143750|OS01G0143750|transcript|OS01T0143750-00|protein_coding||c.*1409_…
chr01	2375993	T	TAA	23207.6	0/0	0/0	1/1	0/0	0/0	1/1	1/1	1/1	0/0	1/1	0/0	1/1	1/1	1/1	0/0	0/0	0/0	0/0	0/0	1/1	0/0	0/0	0/0	0/0	TAA|upstream_gene_variant|MODIFIER|OS01G0143700|OS01G0143700|transcript|OS01T0143700-00|protein_coding||c.-1928_-1927insTT|||||1928|,TAA|downstream_gene_variant|MODIFIER|OS01G0143750|OS01G0143750|transcript|OS01T0143750-00|protein_coding||c.*3232_*3233insAA|||||1903|,TAA|downstream_gene_variant|MODIFIER|OS01G0143900|OS01G0143900|transcript|OS01T0143900-01|protein_coding||c.*1633_*1634insTT|||||13…
chr01	2376674	C	CGGTGGT	25652.6	0/0	0/0	1|1	0/0	0/0	1|1	1|1	1|1	0/0	1|1	0/0	1|1	1|1	1|1	0/0	0/0	0/0	0/0	0/0	1|1	0/0	0/0	0/0	0/0	CGGTGGT|conservative_inframe_insertion|MODERATE|OS01G0143800|OS01G0143800|transcript|OS01T0143800-01|protein_coding|1/3|c.36_37insACCACC|p.Ala12_Ala13insThrThr|87/1102|36/828|12/275||,CGGTGGT|conservative_inframe_insertion|MODERATE|OS01G0143800|OS01G0143800|transcript|OS01T0143800-03|protein_coding|1/3|c.36_37insACCACC|p.Ala12_Ala13insThrThr|59/1043|36/828|12/275||,CGGTGGT|downstream_gene_variant…
chr01	2377027	GTT	G	19917.7	0/0	0/0	1|1	0/0	0/0	1|1	1|1	1|1	0/0	1|1	0/0	1|1	1|1	1|1	0/0	0/0	0/0	0/0	0/0	1|1	0/0	0/0	0/0	0/0	G|upstream_gene_variant|MODIFIER|OS01G0143800|OS01G0143800|transcript|OS01T0143800-01|protein_coding||c.-319_-318delAA|||||267|,G|upstream_gene_variant|MODIFIER|OS01G0143800|OS01G0143800|transcript|OS01T0143800-03|protein_coding||c.-319_-318delAA|||||295|,G|downstream_gene_variant|MODIFIER|OS01G0143900|OS01G0143900|transcript|OS01T0143900-01|protein_coding||c.*598_*599delAA|||||341|,G|downstream_…
chr01	2377044	AAG	A	19197.7	0/0	0/0	1|1	0/0	0/0	1|1	1|1	1|1	0/0	1|1	0/0	1|1	1|1	1|1	0/0	0/0	0/0	0/0	0/0	1|1	0/0	0/0	0/0	0/0	A|upstream_gene_variant|MODIFIER|OS01G0143800|OS01G0143800|transcript|OS01T0143800-01|protein_coding||c.-336_-335delCT|||||284|,A|upstream_gene_variant|MODIFIER|OS01G0143800|OS01G0143800|transcript|OS01T0143800-03|protein_coding||c.-336_-335delCT|||||312|,A|downstream_gene_variant|MODIFIER|OS01G0143900|OS01G0143900|transcript|OS01T0143900-01|protein_coding||c.*581_*582delCT|||||324|,A|downstream_…
chr01	2377158	TTA	T	10405.6	0/0	0/0	1|1	0/0	0/0	1|1	1|1	1|1	0/0	1|1	0/0	1|1	1|1	1|1	0/0	0/0	0/0	0/0	0/0	1|1	0/0	0/0	0/0	0/0	T|upstream_gene_variant|MODIFIER|OS01G0143800|OS01G0143800|transcript|OS01T0143800-01|protein_coding||c.-450_-449delTA|||||398|,T|upstream_gene_variant|MODIFIER|OS01G0143800|OS01G0143800|transcript|OS01T0143800-03|protein_coding||c.-450_-449delTA|||||426|,T|downstream_gene_variant|MODIFIER|OS01G0143900|OS01G0143900|transcript|OS01T0143900-01|protein_coding||c.*467_*468delTA|||||210|,T|downstream_…
chr01	2377192	CA	C	14785.6	0/0	0/0	1|1	0/0	0/0	1|1	1|1	1|1	0/0	1|1	0/0	1|1	1|1	1|1	0/0	0/0	0/0	0/0	0/0	1|1	0/0	0/0	0/0	0/0	C|upstream_gene_variant|MODIFIER|OS01G0143800|OS01G0143800|transcript|OS01T0143800-01|protein_coding||c.-483delT|||||432|,C|upstream_gene_variant|MODIFIER|OS01G0143800|OS01G0143800|transcript|OS01T0143800-03|protein_coding||c.-483delT|||||460|,C|downstream_gene_variant|MODIFIER|OS01G0143900|OS01G0143900|transcript|OS01T0143900-01|protein_coding||c.*434delT|||||176|,C|downstream_gene_variant|MODIF…
chr01	2377352	TA	T	16445.6	0/0	0/0	1|1	0/0	0/0	1|1	1|1	1|1	0/0	1|1	0/0	1|1	1|1	1|1	0/0	0/0	0/0	0/0	0/0	1|1	0/0	0/0	0/0	0/0	T|upstream_gene_variant|MODIFIER|OS01G0143800|OS01G0143800|transcript|OS01T0143800-01|protein_coding||c.-643delT|||||592|,T|upstream_gene_variant|MODIFIER|OS01G0143800|OS01G0143800|transcript|OS01T0143800-03|protein_coding||c.-643delT|||||620|,T|downstream_gene_variant|MODIFIER|OS01G0143900|OS01G0143900|transcript|OS01T0143900-01|protein_coding||c.*274delT|||||16|,T|downstream_gene_variant|MODIFI…
chr01	2377463	AG	A	17306.6	0/0	0/0	1/1	0/0	0/0	1/1	1/1	1/1	0/0	1/1	0/0	1/1	1/1	1/1	0/0	0/0	0/0	0/0	0/0	1/1	0/0	0/0	0/0	0/0	A|3_prime_UTR_variant|MODIFIER|OS01G0143900|OS01G0143900|transcript|OS01T0143900-01|protein_coding|1/1|c.*163delC|||||163|,A|upstream_gene_variant|MODIFIER|OS01G0143800|OS01G0143800|transcript|OS01T0143800-01|protein_coding||c.-754delC|||||703|,A|upstream_gene_variant|MODIFIER|OS01G0143800|OS01G0143800|transcript|OS01T0143800-03|protein_coding||c.-754delC|||||731|,A|downstream_gene_variant|MODIFI…
chr01	2382359	CA	C	1717.84	0/0	0/0	1/1	0/0	0/0	./.	0/0	./.	0/0	./.	0/0	0/0	./.	0/0	0/0	0/0	0/0	0/0	0/0	./.	0/0	0/0	0/0	0/0	C|downstream_gene_variant|MODIFIER|OS01G0144100|OS01G0144100|transcript|OS01T0144100-01|protein_coding||c.*1461delT|||||1251|,C|intron_variant|MODIFIER|OS01G0144000|OS01G0144000|transcript|OS01T0144000-01|protein_coding|1/6|c.172+52delT||||||WARNING_TRANSCRIPT_NO_START_CODON
chr01	2383063	A	AG	14175.6	0/0	0/0	1/1	0/0	0/0	1/1	1/1	1/1	0/0	1/1	0/0	1/1	1/1	1/1	0/0	0/0	0/0	0/0	0/0	1/1	0/0	0/0	0/0	0/0	AG|upstream_gene_variant|MODIFIER|OS01G0144000|OS01G0144000|transcript|OS01T0144000-01|protein_coding||c.-481_-480insC|||||480|WARNING_TRANSCRIPT_NO_START_CODON,AG|upstream_gene_variant|MODIFIER|EPlOSAG00000012502|EPlOSAG00000012502|transcript|EPlOSAT00000013890|lincRNA||n.-1453_-1452insG|||||1452|,AG|downstream_gene_variant|MODIFIER|OS01G0144100|OS01G0144100|transcript|OS01T0144100-01|protein_co…
chr01	2383683	G	GTACAGTGTAC	310.98	0/0	0/0	./.	0/0	0/0	./.	1/1	1/1	0/0	1/1	0/0	./.	1/1	1/1	0/0	0/0	0/0	0/0	0/0	./.	0/0	0/0	0/0	0/0	GTACAGTGTAC|3_prime_UTR_variant|MODIFIER|OS01G0144100|OS01G0144100|transcript|OS01T0144100-01|protein_coding|6/6|c.*137_*138insGTACACTGTA|||||137|,GTACAGTGTAC|upstream_gene_variant|MODIFIER|OS01G0144000|OS01G0144000|transcript|OS01T0144000-01|protein_coding||c.-1101_-1100insGTACACTGTA|||||1100|WARNING_TRANSCRIPT_NO_START_CODON,GTACAGTGTAC|upstream_gene_variant|MODIFIER|EPlOSAG00000012502|EPlOSAG0…
chr01	2383707	G	GGA	282.11	0/0	0/0	./.	0/0	0/0	./.	1/1	1/1	0/0	1/1	0/0	./.	./.	1/1	0/0	0/0	0/0	0/0	0/0	./.	0/0	0/0	0/0	0/0	GGA|3_prime_UTR_variant|MODIFIER|OS01G0144100|OS01G0144100|transcript|OS01T0144100-01|protein_coding|6/6|c.*113_*114insTC|||||113|,GGA|upstream_gene_variant|MODIFIER|OS01G0144000|OS01G0144000|transcript|OS01T0144000-01|protein_coding||c.-1125_-1124insTC|||||1124|WARNING_TRANSCRIPT_NO_START_CODON,GGA|upstream_gene_variant|MODIFIER|EPlOSAG00000012502|EPlOSAG00000012502|transcript|EPlOSAT00000013890…
chr01	2383738	AGT	A	6462.36	0/0	0/0	1|1	0/0	0/0	1|1	1|1	1|1	0/0	1|1	0/0	1|1	1|1	1|1	0/0	0/0	0/0	0/0	0/0	1|1	0/0	0/0	0/0	0/0	A|3_prime_UTR_variant|MODIFIER|OS01G0144100|OS01G0144100|transcript|OS01T0144100-01|protein_coding|6/6|c.*81_*82delAC|||||81|,A|upstream_gene_variant|MODIFIER|OS01G0144000|OS01G0144000|transcript|OS01T0144000-01|protein_coding||c.-1157_-1156delAC|||||1155|WARNING_TRANSCRIPT_NO_START_CODON,A|upstream_gene_variant|MODIFIER|EPlOSAG00000012502|EPlOSAG00000012502|transcript|EPlOSAT00000013890|lincRNA|…
chr01	2383741	AG	A	6822.36	0/0	0/0	1|1	0/0	0/0	1|1	1|1	1|1	0/0	1|1	0/0	1|1	1|1	1|1	0/0	0/0	0/0	0/0	0/0	1|1	0/0	0/0	0/0	0/0	A|3_prime_UTR_variant|MODIFIER|OS01G0144100|OS01G0144100|transcript|OS01T0144100-01|protein_coding|6/6|c.*79delC|||||79|,A|upstream_gene_variant|MODIFIER|OS01G0144000|OS01G0144000|transcript|OS01T0144000-01|protein_coding||c.-1159delC|||||1158|WARNING_TRANSCRIPT_NO_START_CODON,A|upstream_gene_variant|MODIFIER|EPlOSAG00000012502|EPlOSAG00000012502|transcript|EPlOSAT00000013890|lincRNA||n.-774delG|…
chr01	2383913	T	TA	19218.6	0/0	0/0	1|1	0/0	0/0	1|1	1|1	1|1	0/0	1|1	0/0	1|1	1|1	1|1	0/0	0/0	0/0	0/0	0/0	1/1	0/0	0/0	0/0	0/0	TA|upstream_gene_variant|MODIFIER|OS01G0144000|OS01G0144000|transcript|OS01T0144000-01|protein_coding||c.-1331_-1330insT|||||1330|WARNING_TRANSCRIPT_NO_START_CODON,TA|upstream_gene_variant|MODIFIER|EPlOSAG00000012502|EPlOSAG00000012502|transcript|EPlOSAT00000013890|lincRNA||n.-603_-602insA|||||602|,TA|intron_variant|MODIFIER|OS01G0144100|OS01G0144100|transcript|OS01T0144100-01|protein_coding|5/5|…
chr01	2383950	GACAGCCATTGGTGTGTGCATGATTGCAACATTGGTT	G	15549.6	0/0	0/0	1|1	0/0	0/0	1|1	1|1	1|1	0/0	1|1	0/0	1|1	1|1	1|1	0/0	0/0	0/0	0/0	0/0	1/1	0/0	0/0	0/0	0/0	G|splice_region_variant&intron_variant|LOW|OS01G0144100|OS01G0144100|transcript|OS01T0144100-01|protein_coding|5/5|c.545+7_545+42delAACCAATGTTGCAATCATGCACACACCAATGGCTGT||||||,G|upstream_gene_variant|MODIFIER|OS01G0144000|OS01G0144000|transcript|OS01T0144000-01|protein_coding||c.-1403_-1368delAACCAATGTTGCAATCATGCACACACCAATGGCTGT|||||1367|WARNING_TRANSCRIPT_NO_START_CODON,G|upstream_gene_variant|MO…
chr01	2384063	CAAA	C	16403.6	0/0	0/0	1/1	0/0	0/0	1/1	1|1	1/1	0/0	1/1	0/0	1/1	1/1	1/1	0/0	0/0	0/0	0/0	0/0	1/1	0/0	0/0	0/0	0/0	C|upstream_gene_variant|MODIFIER|OS01G0144000|OS01G0144000|transcript|OS01T0144000-01|protein_coding||c.-1483_-1481delTTT|||||1480|WARNING_TRANSCRIPT_NO_START_CODON,C|upstream_gene_variant|MODIFIER|EPlOSAG00000012502|EPlOSAG00000012502|transcript|EPlOSAT00000013890|lincRNA||n.-452_-450delAAA|||||452|,C|intron_variant|MODIFIER|OS01G0144100|OS01G0144100|transcript|OS01T0144100-01|protein_coding|4/5…
chr01	2384159	C	CG	17753.6	0/0	0/0	1|1	0/0	0/0	1|1	1|1	1|1	0/0	1|1	0/0	1|1	1|1	1|1	0/0	0/0	0/0	0/0	0/0	1|1	0/0	0/0	0/0	0/0	CG|upstream_gene_variant|MODIFIER|OS01G0144000|OS01G0144000|transcript|OS01T0144000-01|protein_coding||c.-1577_-1576insC|||||1576|WARNING_TRANSCRIPT_NO_START_CODON,CG|upstream_gene_variant|MODIFIER|EPlOSAG00000012502|EPlOSAG00000012502|transcript|EPlOSAT00000013890|lincRNA||n.-357_-356insG|||||356|,CG|intron_variant|MODIFIER|OS01G0144100|OS01G0144100|transcript|OS01T0144100-01|protein_coding|4/5|…
chr01	2384161	A	AATTGTTCTTAG	19343.6	0/0	0/0	1|1	0/0	0/0	1|1	1|1	1|1	0/0	1|1	0/0	1|1	1|1	1|1	0/0	0/0	0/0	0/0	0/0	1|1	0/0	0/0	0/0	0/0	AATTGTTCTTAG|upstream_gene_variant|MODIFIER|OS01G0144000|OS01G0144000|transcript|OS01T0144000-01|protein_coding||c.-1579_-1578insCTAAGAACAAT|||||1578|WARNING_TRANSCRIPT_NO_START_CODON,AATTGTTCTTAG|upstream_gene_variant|MODIFIER|EPlOSAG00000012502|EPlOSAG00000012502|transcript|EPlOSAT00000013890|lincRNA||n.-355_-354insATTGTTCTTAG|||||354|,AATTGTTCTTAG|intron_variant|MODIFIER|OS01G0144100|OS01G0144…
chr01	2384216	AT	A	19641.6	0/0	0/0	1|1	0/0	0/0	1|1	1|1	1|1	0/0	1|1	0/0	1|1	1|1	1|1	0/0	0/0	0/0	0/0	0/0	1|1	0/0	0/0	0/0	0/0	A|upstream_gene_variant|MODIFIER|OS01G0144000|OS01G0144000|transcript|OS01T0144000-01|protein_coding||c.-1634delA|||||1633|WARNING_TRANSCRIPT_NO_START_CODON,A|upstream_gene_variant|MODIFIER|EPlOSAG00000012502|EPlOSAG00000012502|transcript|EPlOSAT00000013890|lincRNA||n.-299delT|||||299|,A|intron_variant|MODIFIER|OS01G0144100|OS01G0144100|transcript|OS01T0144100-01|protein_coding|4/5|c.484+102delA|…
chr01	2384219	AT	A	19919.6	0/0	0/0	1|1	0/0	0/0	1|1	1|1	1|1	0/0	1|1	0/0	1|1	1|1	1|1	0/0	0/0	0/0	0/0	0/0	1|1	0/0	0/0	0/0	0/0	A|upstream_gene_variant|MODIFIER|OS01G0144000|OS01G0144000|transcript|OS01T0144000-01|protein_coding||c.-1637delA|||||1636|WARNING_TRANSCRIPT_NO_START_CODON,A|upstream_gene_variant|MODIFIER|EPlOSAG00000012502|EPlOSAG00000012502|transcript|EPlOSAT00000013890|lincRNA||n.-296delT|||||296|,A|intron_variant|MODIFIER|OS01G0144100|OS01G0144100|transcript|OS01T0144100-01|protein_coding|4/5|c.484+99delA||…
chr01	2384621	GATGCCA	G	27725.6	0/0	0/0	1|1	0/0	0/0	1|1	1|1	1|1	0/0	1|1	0/0	1|1	1|1	1|1	0/0	0/0	0/0	0/0	0/0	1|1	0/0	0/0	0/0	0/0	G|upstream_gene_variant|MODIFIER|OS01G0144200|OS01G0144200|transcript|OS01T0144200-01|protein_coding||c.-1842_-1837delATGCCA|||||1751|,G|downstream_gene_variant|MODIFIER|EPlOSAG00000012502|EPlOSAG00000012502|transcript|EPlOSAT00000013890|lincRNA||n.*40_*45delATGCCA|||||40|,G|intron_variant|MODIFIER|OS01G0144100|OS01G0144100|transcript|OS01T0144100-01|protein_coding|3/5|c.402+157_402+162delTGGCAT|…
chr01	2384949	CTG	C	10495.6	0/0	0/0	1|1	0/0	0/0	1|1	1|1	1|1	0/0	1|1	0/0	1|1	1|1	1|1	0/0	0/0	0/0	0/0	0/0	1|1	0/0	0/0	0/0	0/0	C|upstream_gene_variant|MODIFIER|OS01G0144200|OS01G0144200|transcript|OS01T0144200-01|protein_coding||c.-1514_-1513delTG|||||1423|,C|downstream_gene_variant|MODIFIER|EPlOSAG00000012502|EPlOSAG00000012502|transcript|EPlOSAT00000013890|lincRNA||n.*368_*369delTG|||||368|,C|intron_variant|MODIFIER|OS01G0144100|OS01G0144100|transcript|OS01T0144100-01|protein_coding|2/5|c.340+46_340+47delCA||||||
chr01	2384971	C	CG	11007.6	0/0	0/0	1|1	0/0	0/0	1|1	1|1	1|1	0/0	1|1	0/0	1|1	1|1	1|1	0/0	0/0	0/0	0/0	0/0	1|1	0/0	0/0	0/0	0/0	CG|upstream_gene_variant|MODIFIER|OS01G0144200|OS01G0144200|transcript|OS01T0144200-01|protein_coding||c.-1493_-1492insG|||||1401|,CG|downstream_gene_variant|MODIFIER|EPlOSAG00000012502|EPlOSAG00000012502|transcript|EPlOSAT00000013890|lincRNA||n.*389_*390insG|||||390|,CG|intron_variant|MODIFIER|OS01G0144100|OS01G0144100|transcript|OS01T0144100-01|protein_coding|2/5|c.340+25_340+26insC||||||
chr01	2385104	CT	C	22065.6	0/0	0/0	1/1	0/0	0/0	1/1	1/1	1/1	0/0	1/1	0/0	1/1	1/1	1/1	0/0	0/0	0/0	0/0	0/0	1/1	0/0	0/0	0/0	0/0	C|upstream_gene_variant|MODIFIER|OS01G0144200|OS01G0144200|transcript|OS01T0144200-01|protein_coding||c.-1359delT|||||1268|,C|downstream_gene_variant|MODIFIER|EPlOSAG00000012502|EPlOSAG00000012502|transcript|EPlOSAT00000013890|lincRNA||n.*523delT|||||523|,C|intron_variant|MODIFIER|OS01G0144100|OS01G0144100|transcript|OS01T0144100-01|protein_coding|1/5|c.268-36delA||||||
chr01	2385449	AGGC	A	21778.6	0/0	0/0	1|1	0/0	0/0	1|1	1|1	1|1	0/0	1|1	0/0	1/1	1|1	1|1	0/0	0/0	0/0	0/0	0/0	1|1	0/0	0/0	0/0	0/0	A|conservative_inframe_deletion|MODERATE|OS01G0144100|OS01G0144100|transcript|OS01T0144100-01|protein_coding|1/6|c.76_78delGCC|p.Ala26del|144/873|76/597|26/198||,A|upstream_gene_variant|MODIFIER|OS01G0144200|OS01G0144200|transcript|OS01T0144200-01|protein_coding||c.-1014_-1012delGGC|||||923|,A|downstream_gene_variant|MODIFIER|EPlOSAG00000012502|EPlOSAG00000012502|transcript|EPlOSAT00000013890|lin…
chr01	2385556	TCCGA	T	21585.6	0/0	0/0	1|1	0/0	0/0	1|1	1|1	1|1	0/0	1|1	0/0	1|1	1|1	1|1	0/0	0/0	0/0	0/0	0/0	1|1	0/0	0/0	0/0	0/0	T|5_prime_UTR_variant|MODIFIER|OS01G0144100|OS01G0144100|transcript|OS01T0144100-01|protein_coding|1/6|c.-33_-30delTCGG|||||30|,T|upstream_gene_variant|MODIFIER|OS01G0144200|OS01G0144200|transcript|OS01T0144200-01|protein_coding||c.-907_-904delCCGA|||||816|,T|downstream_gene_variant|MODIFIER|EPlOSAG00000012502|EPlOSAG00000012502|transcript|EPlOSAT00000013890|lincRNA||n.*975_*978delCCGA|||||975|
chr01	2385580	T	TG	23192.6	0/0	0/0	1|1	0/0	0/0	1|1	1|1	1|1	0/0	1|1	0/0	1|1	1|1	1|1	0/0	0/0	0/0	0/0	0/0	1|1	0/0	0/0	0/0	0/0	TG|5_prime_UTR_variant|MODIFIER|OS01G0144100|OS01G0144100|transcript|OS01T0144100-01|protein_coding|1/6|c.-54dupC|||||54|,TG|upstream_gene_variant|MODIFIER|OS01G0144200|OS01G0144200|transcript|OS01T0144200-01|protein_coding||c.-884_-883insG|||||792|,TG|downstream_gene_variant|MODIFIER|EPlOSAG00000012502|EPlOSAG00000012502|transcript|EPlOSAT00000013890|lincRNA||n.*998_*999insG|||||999|
chr01	2385586	CT	C	23104.6	0/0	0/0	1|1	0/0	0/0	1|1	1|1	1|1	0/0	1|1	0/0	1|1	1|1	1|1	0/0	0/0	0/0	0/0	0/0	1|1	0/0	0/0	0/0	0/0	C|5_prime_UTR_variant|MODIFIER|OS01G0144100|OS01G0144100|transcript|OS01T0144100-01|protein_coding|1/6|c.-60delA|||||60|,C|upstream_gene_variant|MODIFIER|OS01G0144200|OS01G0144200|transcript|OS01T0144200-01|protein_coding||c.-877delT|||||786|,C|downstream_gene_variant|MODIFIER|EPlOSAG00000012502|EPlOSAG00000012502|transcript|EPlOSAT00000013890|lincRNA||n.*1005delT|||||1005|
chr01	2385917	T	TTGTACTTACTAG	20007.6	0/0	0/0	1|1	0/0	0/0	1|1	1|1	1|1	0/0	1|1	0/0	1|1	1|1	1|1	0/0	0/0	0/0	0/0	0/0	1|1	0/0	0/0	0/0	0/0	TTGTACTTACTAG|upstream_gene_variant|MODIFIER|OS01G0144100|OS01G0144100|transcript|OS01T0144100-01|protein_coding||c.-391_-390insCTAGTAAGTACA|||||325|,TTGTACTTACTAG|upstream_gene_variant|MODIFIER|OS01G0144200|OS01G0144200|transcript|OS01T0144200-01|protein_coding||c.-547_-546insTGTACTTACTAG|||||455|,TTGTACTTACTAG|downstream_gene_variant|MODIFIER|EPlOSAG00000012502|EPlOSAG00000012502|transcript|EPl…
[truncated: 162,252 more rows]
