# Supplementary material for: Genomic Variation in Korean japonica Rice Varieties
Source: Genes (Basel). 2021 Oct 30;12(11):1749. doi: 10.3390/genes12111749 (PMC8623644; doi:10.3390/genes12111749)
Supplement: Supplementary file 1 [file genes-12-01749-s001.zip › TableS4_Indel_S20_info.xlsx]

## Sheet: KJV24_variants.snpEff.varonly.h
Tabls S3. Information about InDels longer than 20 bp detected in this study
Chromosome	Position (bp)	Reference allele	Alternative allele	Quality	Genotype of varieties (0: reference allele, 1: the first alternative allele, 2: the second alternative allele, 3: the third alternative allele, etc.., /: not-phased genotype, |: phased genotype, ./.: missing genotype)																								Annotation
					Cheongho	Dami	Dongan	Dongjin	Giho	Haechanmulgyeol	Hiami	Hwacheong	Hwayeong	Ilpum	Jinbu43	Jopyeong	Joun	Junam	Nampyeong	Odae	Saeilmi	Saenuri	Samgwang	Seogan	Seomyeong	Sindongjin	Sobi	Unbong40
chr01	11075	TAACCAGAAAACCGGATAGGACGG	T	3070.79	0/0	0/0	0/0	0/0	0/0	0/0	0/0	0/0	0/0	0/0	1/1	0/0	0/0	0/0	0/0	1/1	0/0	0/0	0/0	0/0	0/0	0/0	0/0	0/0	T|upstream_gene_variant|MODIFIER|OS01G0100200|OS01G0100200|transcript|OS01T0100200-01|protein_coding||c.-722_-700delAACCAGAAAACCGGATAGGACGG|||||142|,T|upstream_gene_variant|MODIFIER|OS01G0100400|OS01G0100400|transcript|OS01T0100400-01|protein_coding||c.-1698_-1676delAACCAGAAAACCGGATAGGACGG|||||1645|,T|downstream_gene_variant|MODIFIER|OS01G0100100|OS01G0100100|transcript|OS01T0100100-01|protein_co…
chr01	731175	A	AACAAGGAAATCAGACATTGAAAGGAAATTGGGGATTAGAGGGACTGATTCATGATATTTTG	1232.41	0/0	0/0	0/0	0/0	1|1	0/0	0/0	./.	0/0	0/0	0/0	0/0	./.	0/0	0/0	0/0	0/0	0/0	0/0	0/0	0/0	0/0	0/0	0/0	AACAAGGAAATCAGACATTGAAAGGAAATTGGGGATTAGAGGGACTGATTCATGATATTTTG|3_prime_UTR_variant|MODIFIER|OS01G0113400|OS01G0113400|transcript|OS01T0113400-02|protein_coding|1/1|c.*308_*309insCAAAATATCATGAATCAGTCCCTCTAATCCCCAATTTCCTTTCAATGTCTGATTTCCTTGT|||||308|WARNING_TRANSCRIPT_NO_START_CODON,AACAAGGAAATCAGACATTGAAAGGAAATTGGGGATTAGAGGGACTGATTCATGATATTTTG|upstream_gene_variant|MODIFIER|EPlOSAG00000003682|EPlO…
chr01	737864	AGAGCCAGGGCAGCCACGCGCAGTGGCGCTGG	A	2733.73	0/0	0/0	0/0	0/0	1|1	0/0	0/0	1|1	0/0	0/0	0/0	0/0	1|1	0/0	0/0	0/0	0/0	0/0	0/0	0/0	0/0	0/0	0/0	0/0	A|5_prime_UTR_variant|MODIFIER|OS01G0113400|OS01G0113400|transcript|OS01T0113400-01|protein_coding|1/6|c.-322_-292delCCAGCGCCACTGCGCGTGGCTGCCCTGGCTC|||||491|WARNING_TRANSCRIPT_NO_START_CODON,A|upstream_gene_variant|MODIFIER|OS01G0113650|OS01G0113650|transcript|OS01T0113650-00|protein_coding||c.-1063_-1033delGAGCCAGGGCAGCCACGCGCAGTGGCGCTGG|||||1043|,A|upstream_gene_variant|MODIFIER|OS01G0113750|OS…
chr01	742237	AGTAAGAATTTTTATTTTTTTGTTTTTTTTTTTTTT	A	5177.73	0/0	0/0	0/0	0/0	1|1	0/0	0/0	1|1	0/0	0/0	0/0	0/0	1|1	0/0	0/0	0/0	0/0	0/0	0/0	0/0	0/0	0/0	0/0	0/0	A|upstream_gene_variant|MODIFIER|OS01G0113400|OS01G0113400|transcript|OS01T0113400-01|protein_coding||c.-4898_-4864delAAAAAAAAAAAAAACAAAAAAATAAAAATTCTTAC|||||4218|WARNING_TRANSCRIPT_NO_START_CODON,A|upstream_gene_variant|MODIFIER|OS01G0113600|OS01G0113600|transcript|OS01T0113600-01|protein_coding||c.-620_-586delAAAAAAAAAAAAAACAAAAAAATAAAAATTCTTAC|||||441|,A|upstream_gene_variant|MODIFIER|OS01G011…
chr01	749137	GGCAATCAACCGTGCCATACT	G	6385.73	0/0	0/0	0/0	0/0	1/1	0/0	0/0	1/1	0/0	0/0	0/0	0/0	1/1	0/0	0/0	0/0	0/0	0/0	0/0	0/0	0/0	0/0	0/0	0/0	G|upstream_gene_variant|MODIFIER|OS01G0113700|OS01G0113700|transcript|OS01T0113700-00|protein_coding||c.-3980_-3961delAGTATGGCACGGTTGATTGC|||||3961|,G|upstream_gene_variant|MODIFIER|OS01G0113950|OS01G0113950|transcript|OS01T0113950-00|protein_coding||c.-5267_-5248delGCAATCAACCGTGCCATACT|||||3051|,G|upstream_gene_variant|MODIFIER|EPlOSAG00000006143|EPlOSAG00000006143|transcript|EPlOSAT00000007531|…
chr01	841678	G	GATCATTCCTTTCAAAAAAAAAATAA	8391.77	0/0	0/0	0/0	0/0	1|1	0/0	0/0	1|1	0/0	0/0	0/0	0/0	1|1	0/0	0/0	0/0	0/0	0/0	0/0	0/0	0/0	0/0	0/0	0/0	GATCATTCCTTTCAAAAAAAAAATAA|upstream_gene_variant|MODIFIER|OS01G0115500|OS01G0115500|transcript|OS01T0115500-00|protein_coding||c.-851_-850insTTATTTTTTTTTTGAAAGGAATGAT|||||851|WARNING_TRANSCRIPT_NO_START_CODON,GATCATTCCTTTCAAAAAAAAAATAA|upstream_gene_variant|MODIFIER|OS01G0115600|OS01G0115600|transcript|OS01T0115600-01|protein_coding||c.-1865_-1864insATCATTCCTTTCAAAAAAAAAATAA|||||1851|,GATCATTCCTT…
chr01	842028	CCTTGAAAGAGTACGCAGCATCAA	C	6620.73	0/0	0/0	0/0	0/0	1|1	0/0	0/0	1|1	0/0	0/0	0/0	0/0	1|1	0/0	0/0	0/0	0/0	0/0	0/0	0/0	0/0	0/0	0/0	0/0	C|frameshift_variant|HIGH|OS01G0115566|OS01G0115566|transcript|OS01T0115566-00|protein_coding|1/1|c.707_729delTTGATGCTGCGTACTCTTTCAAG|p.Ile236fs|729/756|707/756|236/251||,C|upstream_gene_variant|MODIFIER|OS01G0115500|OS01G0115500|transcript|OS01T0115500-00|protein_coding||c.-1223_-1201delTTGATGCTGCGTACTCTTTCAAG|||||1201|WARNING_TRANSCRIPT_NO_START_CODON,C|upstream_gene_variant|MODIFIER|OS01G01156…
chr01	911314	ACGCCATTCGCGACCGGCTGC	A	3334.73	0/0	0/0	0/0	0/0	1/1	0/0	0/0	1/1	0/0	0/0	0/0	0/0	1/1	0/0	0/0	0/0	0/0	0/0	0/0	0/0	0/0	0/0	0/0	0/0	A|upstream_gene_variant|MODIFIER|OS01G0116250|OS01G0116250|transcript|OS01T0116250-00|protein_coding||c.-673_-654delCGCCATTCGCGACCGGCTGC|||||663|,A|upstream_gene_variant|MODIFIER|OS01G0116300|OS01G0116300|transcript|OS01T0116300-01|protein_coding||c.-4324_-4305delCGCCATTCGCGACCGGCTGC|||||4290|,A|downstream_gene_variant|MODIFIER|EPlOSAG00000023410|EPlOSAG00000023410|transcript|EPlOSAT00000024798|l…
chr01	913662	G	GATAGATGGTGCTCCAAACGATGGGAGC	6794.77	0/0	0/0	0/0	0/0	1/1	0/0	0/0	1/1	0/0	0/0	0/0	0/0	1/1	0/0	0/0	0/0	0/0	0/0	0/0	0/0	0/0	0/0	0/0	0/0	GATAGATGGTGCTCCAAACGATGGGAGC|disruptive_inframe_insertion|MODERATE|OS01G0116200|OS01G0116200|transcript|OS01T0116200-01|protein_coding|1/3|c.531_557dupGCTCCCATCGTTTGGAGCACCATCTAT|p.Met177_Ser185dup|584/2282|557/2133|186/710||,GATAGATGGTGCTCCAAACGATGGGAGC|3_prime_UTR_variant|MODIFIER|OS01G0116250|OS01G0116250|transcript|OS01T0116250-00|protein_coding|2/2|c.*1171_*1197dupGATGGTGCTCCAAACGATGGGAGCATA…
chr01	920847	T	TACGAAGCCAAAATTTAAATTTGAA	6572.77	0/0	0/0	0/0	0/0	1|1	0/0	0/0	1|1	0/0	0/0	0/0	0/0	1|1	0/0	0/0	0/0	0/0	0/0	0/0	0/0	0/0	0/0	0/0	0/0	TACGAAGCCAAAATTTAAATTTGAA|upstream_gene_variant|MODIFIER|EPlOSAG00000040747|EPlOSAG00000040747|transcript|EPlOSAT00000042135|lincRNA||n.-4156_-4155insTTCAAATTTAAATTTTGGCTTCGT|||||4156|,TACGAAGCCAAAATTTAAATTTGAA|upstream_gene_variant|MODIFIER|OS01G0116650|OS01G0116650|transcript|OS01T0116650-00|protein_coding||c.-735_-734insACGAAGCCAAAATTTAAATTTGAA|||||448|,TACGAAGCCAAAATTTAAATTTGAA|upstream_gene_…
chr01	1298868	G	GTTTAGGCCCGATTGAGATAACATTCCATATCTCAAACGGGCCTAAAGTTGCGGCCCGTCACAGATGACCATCATCTGTGACGGGCACCAAC	1168.65	0/0	0/0	0/0	0/0	0/0	./.	0/0	0/0	0/0	0/0	0/0	0/0	0/0	0/0	0/0	0/0	0/0	0/0	0/0	0/0	0/0	1/1	0/0	0/0	GTTTAGGCCCGATTGAGATAACATTCCATATCTCAAACGGGCCTAAAGTTGCGGCCCGTCACAGATGACCATCATCTGTGACGGGCACCAAC|upstream_gene_variant|MODIFIER|EPlOSAG00000045734|EPlOSAG00000045734|transcript|EPlOSAT00000047122|lincRNA||n.-471_-470insTTTAGGCCCGATTGAGATAACATTCCATATCTCAAACGGGCCTAAAGTTGCGGCCCGTCACAGATGACCATCATCTGTGACGGGCACCAAC|||||470|,GTTTAGGCCCGATTGAGATAACATTCCATATCTCAAACGGGCCTAAAGTTGCGGCCCGTCACAGATGACCATCATCTGTGACG…
chr01	1366644	GTGGTATGAAAGATGGAGATTAT	G	63.17	0/0	0/0	0/0	0/0	.	0/0	.	1|1	0/0	.	0/0	0/0	1|1	0/0	0/0	0/0	0/0	0/0	0/0	.	0/0	0/0	0/0	0/0	G|upstream_gene_variant|MODIFIER|OS01G0124600|OS01G0124600|transcript|OS01T0124600-00|protein_coding||c.-2384_-2363delATAATCTCCATCTTTCATACCA|||||2363|,G|upstream_gene_variant|MODIFIER|OS01G0124650|OS01G0124650|transcript|OS01T0124650-02|protein_coding||c.-253_-232delATAATCTCCATCTTTCATACCA|||||213|,G|upstream_gene_variant|MODIFIER|OS01G0124900|OS01G0124900|transcript|OS01T0124900-00|protein_coding…
chr01	1366872	A	ACTACATCCGTCCCAAAATACTTATCGCTTTAAGTTTTTTAATTTTTTTTGAAATTATGATATT	766.74	0/0	0/0	0/0	0/0	0/0	0/0	1|1	./.	0/0	0/0	0/0	0/0	0/0	0/0	0/0	0/0	0/0	0/0	0/0	0/0	0/0	0/0	0/0	0/0	ACTACATCCGTCCCAAAATACTTATCGCTTTAAGTTTTTTAATTTTTTTTGAAATTATGATATT|upstream_gene_variant|MODIFIER|OS01G0124600|OS01G0124600|transcript|OS01T0124600-00|protein_coding||c.-2591_-2590insAATATCATAATTTCAAAAAAAATTAAAAAACTTAAAGCGATAAGTATTTTGGGACGGATGTAG|||||2591|,ACTACATCCGTCCCAAAATACTTATCGCTTTAAGTTTTTTAATTTTTTTTGAAATTATGATATT|upstream_gene_variant|MODIFIER|OS01G0124650|OS01G0124650|transcript|OS01T012465…
chr01	1375377	T	TCGAGTTCAACGTTTTGAAGTGAAGTTGGTCTCACATGGATGCGTTGCATGCTCTTG	11927	0/0	0/0	0/0	0/0	1|1	0/0	1|1	1|1	0/0	1|1	0/0	0/0	1|1	0/0	0/0	0/0	0/0	0/0	0/0	1|1	0/0	0/0	0/0	0/0	TCGAGTTCAACGTTTTGAAGTGAAGTTGGTCTCACATGGATGCGTTGCATGCTCTTG|downstream_gene_variant|MODIFIER|OS01G0124900|OS01G0124900|transcript|OS01T0124900-00|protein_coding||c.*1239_*1240insCGAGTTCAACGTTTTGAAGTGAAGTTGGTCTCACATGGATGCGTTGCATGCTCTTG|||||1240|,TCGAGTTCAACGTTTTGAAGTGAAGTTGGTCTCACATGGATGCGTTGCATGCTCTTG|downstream_gene_variant|MODIFIER|EPlOSAG00000020368|EPlOSAG00000020368|transcript|EPlOSAT000000217…
chr01	1376252	T	TACCTCCGATGACGATTGACGAAGGCGAGGATGATGAGGAG	18139	0/0	0/0	0/0	0/0	1|1	0/0	1|1	1|1	0/0	1|1	0/0	0/0	1|1	0/0	0/0	0/0	0/0	0/0	0/0	1|1	0/0	0/0	0/0	0/0	TACCTCCGATGACGATTGACGAAGGCGAGGATGATGAGGAG|frameshift_variant&stop_gained|HIGH|OS01G0125000|OS01G0125000|transcript|OS01T0125000-00|protein_coding|2/2|c.945_946insACCTCCGATGACGATTGACGAAGGCGAGGATGATGAGGAG|p.Asp316fs|946/1020|946/1020|316/339||,TACCTCCGATGACGATTGACGAAGGCGAGGATGATGAGGAG|downstream_gene_variant|MODIFIER|OS01G0124900|OS01G0124900|transcript|OS01T0124900-00|protein_coding||c.*2114_*2115…
chr01	1379005	T	TTATATAGCTGCAAACTCAATTC	11125	0/0	0/0	0/0	0/0	1|1	0/0	1|1	1|1	0/0	1|1	0/0	0/0	1|1	0/0	0/0	0/0	0/0	0/0	0/0	1|1	0/0	0/0	0/0	0/0	TTATATAGCTGCAAACTCAATTC|downstream_gene_variant|MODIFIER|OS01G0124900|OS01G0124900|transcript|OS01T0124900-00|protein_coding||c.*4867_*4868insTATATAGCTGCAAACTCAATTC|||||4868|,TTATATAGCTGCAAACTCAATTC|downstream_gene_variant|MODIFIER|EPlOSAG00000020368|EPlOSAG00000020368|transcript|EPlOSAT00000021756|lincRNA||n.*4116_*4117insTATATAGCTGCAAACTCAATTC|||||4117|,TTATATAGCTGCAAACTCAATTC|downstream_gene_v…
chr01	1398757	GACTTAAATGTGTTCTTTCAACTCAACATAATCCAATTTGAGCCAACAAAATCAACAGAGGTAACAGCCGGCTGGCGGCAACGGTGAGAATATGGCGCTGTGGCAACTCACA	G	2616.1	0/0	0/0	0/0	0/0	1/1	0/0	./.	1/1	0/0	1/1	0/0	0/0	./.	0/0	0/0	0/0	0/0	0/0	0/0	./.	0/0	0/0	0/0	0/0	G|upstream_gene_variant|MODIFIER|EPlOSAG00000004793|EPlOSAG00000004793|transcript|EPlOSAT00000006181|lincRNA||n.-4921_-4811del|||||4811|,G|upstream_gene_variant|MODIFIER|OS01G0125500|OS01G0125500|transcript|OS01T0125500-00|protein_coding||c.-2043_-1933del|||||1933|WARNING_TRANSCRIPT_NO_START_CODON,G|downstream_gene_variant|MODIFIER|OS01G0125550|OS01G0125550|transcript|OS01T0125550-01|protein_codi…
chr01	1399012	A	AAGGCCAGATCCGAGGGGAGTCGGAGAAGAAAACTCCGATATGATTAGGCGC	8090.01	0/0	0/0	0/0	0/0	1/1	0/0	1/1	1/1	0/0	1/1	0/0	0/0	1/1	0/0	0/0	0/0	0/0	0/0	0/0	1/1	0/0	0/0	0/0	0/0	AAGGCCAGATCCGAGGGGAGTCGGAGAAGAAAACTCCGATATGATTAGGCGC|upstream_gene_variant|MODIFIER|OS01G0125500|OS01G0125500|transcript|OS01T0125500-00|protein_coding||c.-2188_-2187insGCGCCTAATCATATCGGAGTTTTCTTCTCCGACTCCCCTCGGATCTGGCCT|||||2188|WARNING_TRANSCRIPT_NO_START_CODON,AAGGCCAGATCCGAGGGGAGTCGGAGAAGAAAACTCCGATATGATTAGGCGC|downstream_gene_variant|MODIFIER|OS01G0125550|OS01G0125550|transcript|OS01T0125550…
chr01	1400281	T	TCCATCTACACTTTAAAACGCCTCAAGGCATGAGGCGAGAGAGC	1274.68	0/0	0/0	0/0	0/0	./.	0/0	./.	./.	0/0	./.	0/0	0/0	1|1	0/0	0/0	0/0	0/0	0/0	0/0	./.	0/0	0/0	0/0	0/0	TCCATCTACACTTTAAAACGCCTCAAGGCATGAGGCGAGAGAGC|upstream_gene_variant|MODIFIER|OS01G0125500|OS01G0125500|transcript|OS01T0125500-00|protein_coding||c.-3457_-3456insGCTCTCTCGCCTCATGCCTTGAGGCGTTTTAAAGTGTAGATGG|||||3457|WARNING_TRANSCRIPT_NO_START_CODON,TCCATCTACACTTTAAAACGCCTCAAGGCATGAGGCGAGAGAGC|upstream_gene_variant|MODIFIER|EPlOSAG00000033805|EPlOSAG00000033805|transcript|EPlOSAT00000035193|lincRNA…
chr01	1435908	TTAACTTTCTCTGCCACTTAATAA	T	9175.98	0/0	0/0	0/0	0/0	1|1	0/0	1|1	1|1	0/0	1|1	0/0	0/0	1|1	0/0	0/0	0/0	0/0	0/0	0/0	1/1	0/0	0/0	0/0	0/0	T|upstream_gene_variant|MODIFIER|OS01G0126000|OS01G0126000|transcript|OS01T0126000-01|protein_coding||c.-978_-956delTTATTAAGTGGCAGAGAAAGTTA|||||954|WARNING_TRANSCRIPT_NO_START_CODON,T|upstream_gene_variant|MODIFIER|OS01G0126200|OS01G0126200|transcript|OS01T0126200-01|protein_coding||c.-1437_-1415delTAACTTTCTCTGCCACTTAATAA|||||1254|,T|intron_variant|MODIFIER|OS01G0126100|OS01G0126100|transcript|OS…
chr01	1450094	G	GGGTATACTGTTTAGCAGTACCGT	17929	0/0	0/0	0/0	0/0	1/1	0/0	1/1	1/1	0/0	1/1	0/0	0/0	1/1	0/0	0/0	0/0	0/0	0/0	0/0	1/1	0/0	0/0	0/0	0/0	GGGTATACTGTTTAGCAGTACCGT|3_prime_UTR_variant|MODIFIER|OS01G0126600|OS01G0126600|transcript|OS01T0126600-01|protein_coding|6/6|c.*13_*14insCTGTTTAGCAGTACCGTGGTATA|||||14|WARNING_TRANSCRIPT_NO_START_CODON&INFO_REALIGN_3_PRIME,GGGTATACTGTTTAGCAGTACCGT|upstream_gene_variant|MODIFIER|OS01G0126401|OS01G0126401|transcript|OS01T0126401-01|protein_coding||c.-3776_-3775insACGGTACTGCTAAACAGTATACC|||||645|,G…
chr01	1489051	AGATATATATATATATATATATATATATATAT	A	13287.2	0/0	0/0	0/0	0/0	1|1	0/0	1|1	1|1	0/0	1|1	./.	./.	1|1	0/0	0/0	./.	0/0	0/0	./.	1|1	0/0	0/0	./.	0/0	A|upstream_gene_variant|MODIFIER|OS01G0127100|OS01G0127100|transcript|OS01T0127100-01|protein_coding||c.-2024_-1994delGATATATATATATATATATATATATATATAT|||||1941|,A|downstream_gene_variant|MODIFIER|OS01G0126900|OS01G0126900|transcript|OS01T0126900-01|protein_coding||c.*164_*194delGATATATATATATATATATATATATATATAT|||||155|,A|downstream_gene_variant|MODIFIER|OS01G0127000|OS01G0127000|transcript|OS01T012…
chr01	1494268	T	TTTAATTGCAAAGCGAAAAAGGTAAAAAAAAATTTTGAAAGGGCCGAAAAAGG	13445	0/0	0/0	0/0	0/0	1/1	0/0	1/1	1/1	0/0	1/1	0/0	0/0	1/1	0/0	0/0	0/0	0/0	0/0	0/0	1/1	0/0	0/0	0/0	0/0	TTTAATTGCAAAGCGAAAAAGGTAAAAAAAAATTTTGAAAGGGCCGAAAAAGG|upstream_gene_variant|MODIFIER|OS01G0127000|OS01G0127000|transcript|OS01T0127000-01|protein_coding||c.-1935_-1934insCCTTTTTCGGCCCTTTCAAAATTTTTTTTTACCTTTTTCGCTTTGCAATTAA|||||1935|WARNING_TRANSCRIPT_NO_START_CODON,TTTAATTGCAAAGCGAAAAAGGTAAAAAAAAATTTTGAAAGGGCCGAAAAAGG|downstream_gene_variant|MODIFIER|OS01G0127100|OS01G0127100|transcript|OS01T0127…
chr01	1495548	A	ACCATCAACTTGGGCTTCGATGTG	723.68	0/0	0/0	0/0	0/0	1|1	0/0	./.	./.	0/0	./.	0/0	0/0	./.	0/0	0/0	0/0	0/0	0/0	0/0	./.	0/0	0/0	0/0	0/0	ACCATCAACTTGGGCTTCGATGTG|upstream_gene_variant|MODIFIER|OS01G0127000|OS01G0127000|transcript|OS01T0127000-01|protein_coding||c.-3215_-3214insCACATCGAAGCCCAAGTTGATGG|||||3215|WARNING_TRANSCRIPT_NO_START_CODON,ACCATCAACTTGGGCTTCGATGTG|downstream_gene_variant|MODIFIER|OS01G0127100|OS01G0127100|transcript|OS01T0127100-01|protein_coding||c.*4131_*4132insCCATCAACTTGGGCTTCGATGTG|||||2869|,ACCATCAACTTGGG…
chr01	1495549	C	CCATCAACTTGGGCTTCGATG	553.68	0/0	0/0	0/0	0/0	./.	0/0	./.	./.	0/0	1|1	0/0	0/0	./.	0/0	0/0	0/0	0/0	0/0	0/0	./.	0/0	0/0	0/0	0/0	CCATCAACTTGGGCTTCGATG|upstream_gene_variant|MODIFIER|OS01G0127000|OS01G0127000|transcript|OS01T0127000-01|protein_coding||c.-3216_-3215insCATCGAAGCCCAAGTTGATG|||||3216|WARNING_TRANSCRIPT_NO_START_CODON,CCATCAACTTGGGCTTCGATG|downstream_gene_variant|MODIFIER|OS01G0127100|OS01G0127100|transcript|OS01T0127100-01|protein_coding||c.*4132_*4133insCATCAACTTGGGCTTCGATG|||||2870|,CCATCAACTTGGGCTTCGATG|down…
chr01	1503901	G	GTGACTGCTCAATTGAGTTTTTTTTGGGATGGAGAGAGTACTCATGTGC	3843.52	0/0	0/0	0/0	0/0	1/1	0/0	1/1	1/1	0/0	1/1	0/0	0/0	1/1	0/0	0/0	0/0	0/0	0/0	0/0	1/1	0/0	0/0	0/0	0/0	GTGACTGCTCAATTGAGTTTTTTTTGGGATGGAGAGAGTACTCATGTGC|upstream_gene_variant|MODIFIER|OS01G0127200|OS01G0127200|transcript|OS01T0127200-01|protein_coding||c.-3561_-3560insGCACATGAGTACTCTCTCCATCCCAAAAAAAACTCAATTGAGCAGTCA|||||3296|,GTGACTGCTCAATTGAGTTTTTTTTGGGATGGAGAGAGTACTCATGTGC|upstream_gene_variant|MODIFIER|OS01G0127400|OS01G0127400|transcript|OS01T0127400-00|protein_coding||c.-4329_-4328insTGACTGCT…
chr01	1514440	G	GTTTGTCATGTGGGTCTCACACTAACTTAACCGCTAT	1947.8	0/0	0/0	0/0	0/0	./.	0/0	./.	./.	0/0	1|1	0/0	0/0	1|1	0/0	0/0	0/0	0/0	0/0	0/0	./.	0/0	0/0	0/0	0/0	GTTTGTCATGTGGGTCTCACACTAACTTAACCGCTAT|upstream_gene_variant|MODIFIER|EPlOSAG00000027109|EPlOSAG00000027109|transcript|EPlOSAT00000028497|lincRNA||n.-1542_-1541insATAGCGGTTAAGTTAGTGTGAGACCCACATGACAAA|||||1542|,GTTTGTCATGTGGGTCTCACACTAACTTAACCGCTAT|upstream_gene_variant|MODIFIER|OS01G0127600|OS01G0127600|transcript|OS01T0127600-01|protein_coding||c.-1438_-1437insTTTGTCATGTGGGTCTCACACTAACTTAACCGCTAT…
chr01	1514441	A	AAATGTTTGTCATGTGGGTCTCACACTAACTTAACCGCTATATCGGATAAAACCGGGATAAATACCGC	469.32	0/0	0/0	0/0	0/0	./.	0/0	1|1	./.	0/0	./.	0/0	0/0	0|0	0/0	0/0	0/0	0/0	0/0	0/0	./.	0/0	0/0	0/0	0/0	AAATGTTTGTCATGTGGGTCTCACACTAACTTAACCGCTATATCGGATAAAACCGGGATAAATACCGC|upstream_gene_variant|MODIFIER|EPlOSAG00000027109|EPlOSAG00000027109|transcript|EPlOSAT00000028497|lincRNA||n.-1543_-1542insGCGGTATTTATCCCGGTTTTATCCGATATAGCGGTTAAGTTAGTGTGAGACCCACATGACAAACATT|||||1543|,AAATGTTTGTCATGTGGGTCTCACACTAACTTAACCGCTATATCGGATAAAACCGGGATAAATACCGC|upstream_gene_variant|MODIFIER|OS01G0127600|OS01G0127600|tr…
chr01	1514443	C	CGGATAAAACCGGGATAAATACCGCTTA	897.73	0/0	0/0	0/0	0/0	./.	0/0	./.	./.	0/0	1|1	0/0	0/0	.	0/0	0/0	0/0	0/0	0/0	0/0	./.	0/0	0/0	0/0	0/0	CGGATAAAACCGGGATAAATACCGCTTA|upstream_gene_variant|MODIFIER|EPlOSAG00000027109|EPlOSAG00000027109|transcript|EPlOSAT00000028497|lincRNA||n.-1545_-1544insTAAGCGGTATTTATCCCGGTTTTATCC|||||1545|,CGGATAAAACCGGGATAAATACCGCTTA|upstream_gene_variant|MODIFIER|OS01G0127600|OS01G0127600|transcript|OS01T0127600-01|protein_coding||c.-1435_-1434insGGATAAAACCGGGATAAATACCGCTTA|||||1393|,CGGATAAAACCGGGATAAATACCGC…
chr01	1519425	T	TATTTATTGTTTTTTTTTGGGGGAG	15155	0/0	0/0	0/0	0/0	1|1	0/0	1|1	1|1	0/0	1|1	0/0	0/0	1|1	0/0	0/0	0/0	0/0	0/0	0/0	1|1	0/0	0/0	0/0	0/0	TATTTATTGTTTTTTTTTGGGGGAG|3_prime_UTR_variant|MODIFIER|OS01G0127700|OS01G0127700|transcript|OS01T0127700-01|protein_coding|1/2|c.*591_*592insATTTATTGTTTTTTTTTGGGGGAG|||||592|,TATTTATTGTTTTTTTTTGGGGGAG|upstream_gene_variant|MODIFIER|EPlOSAG00000043671|EPlOSAG00000043671|transcript|EPlOSAT00000045059|lincRNA||n.-2499_-2498insATTTATTGTTTTTTTTTGGGGGAG|||||2498|,TATTTATTGTTTTTTTTTGGGGGAG|downstream_ge…
chr01	1520058	CGCCCCCCCCCCCCCCACACACACACA	C	13129.2	0/0	0/0	0/0	0/0	1|1	0/0	1|1	1|1	0/0	1|1	0/0	0/0	1|1	0/0	0/0	0/0	0/0	0/0	0/0	1|1	0/0	0/0	0/0	0/0	C|3_prime_UTR_variant|MODIFIER|OS01G0127700|OS01G0127700|transcript|OS01T0127700-01|protein_coding|1/2|c.*1225_*1250delGCCCCCCCCCCCCCCACACACACACA|||||1225|,C|upstream_gene_variant|MODIFIER|EPlOSAG00000043671|EPlOSAG00000043671|transcript|EPlOSAT00000045059|lincRNA||n.-1865_-1840delGCCCCCCCCCCCCCCACACACACACA|||||1865|,C|downstream_gene_variant|MODIFIER|OS01G0127600|OS01G0127600|transcript|OS01T012…
chr01	1521002	C	CATTGTGAGTTGTGACCTTTTTAGATAAAGAGAGTTTT	17089	0/0	0/0	0/0	0/0	1/1	0/0	1/1	1/1	0/0	1/1	0/0	0/0	1/1	0/0	0/0	0/0	0/0	0/0	0/0	1/1	0/0	0/0	0/0	0/0	CATTGTGAGTTGTGACCTTTTTAGATAAAGAGAGTTTT|upstream_gene_variant|MODIFIER|EPlOSAG00000027805|EPlOSAG00000027805|transcript|EPlOSAT00000029193|lincRNA||n.-610_-609insAAAACTCTCTTTATCTAAAAAGGTCACAACTCACAAT|||||610|,CATTGTGAGTTGTGACCTTTTTAGATAAAGAGAGTTTT|upstream_gene_variant|MODIFIER|EPlOSAG00000043671|EPlOSAG00000043671|transcript|EPlOSAT00000045059|lincRNA||n.-922_-921insATTGTGAGTTGTGACCTTTTTAGATAAAGA…
chr01	1803746	T	TGTGAAGTAGACTAGTATATATGTATGTGTCACTTGCTAGATGGAACTAA	13896	0/0	0/0	0/0	0/0	0/0	1/1	1/1	1/1	0/0	1/1	0/0	0/0	1/1	0/0	0/0	0/0	0/0	0/0	0/0	1/1	0/0	0/0	0/0	0/0	TGTGAAGTAGACTAGTATATATGTATGTGTCACTTGCTAGATGGAACTAA|upstream_gene_variant|MODIFIER|OS01G0132766|OS01G0132766|transcript|OS01T0132766-01|protein_coding||c.-609_-608insTTAGTTCCATCTAGCAAGTGACACATACATATATACTAGTCTACTTCAC|||||467|,TGTGAAGTAGACTAGTATATATGTATGTGTCACTTGCTAGATGGAACTAA|intergenic_region|MODIFIER|OS01G0132766-OS01G0132800|OS01G0132766-OS01G0132800|intergenic_region|OS01G0132766-OS01G0132800||…
chr01	2082399	T	TCACTCGCATCCGATGGCGGCAG	25108	0/0	0/0	1/1	0/0	0/0	1/1	1/1	1/1	0/0	1/1	0/0	1/1	1/1	0/0	0/0	0/0	0/0	0/0	0/0	1/1	0/0	0/0	0/0	0/0	TCACTCGCATCCGATGGCGGCAG|upstream_gene_variant|MODIFIER|OS01G0138900|OS01G0138900|transcript|OS01T0138900-01|protein_coding||c.-4560_-4559insCTGCCGCCATCGGATGCGAGTG|||||4497|,TCACTCGCATCCGATGGCGGCAG|downstream_gene_variant|MODIFIER|OS01G0139000|OS01G0139000|transcript|OS01T0139000-00|protein_coding||c.*1096_*1097insCACTCGCATCCGATGGCGGCAG|||||1097|,TCACTCGCATCCGATGGCGGCAG|downstream_gene_variant|MOD…
chr01	2104309	ACATCATTATTCACTAACAAG	A	23790.2	0/0	0/0	1/1	0/0	0/0	1/1	1/1	1/1	0/0	1/1	1/1	1/1	1/1	0/0	0/0	1/1	0/0	0/0	0/0	1/1	0/0	0/0	0/0	0/0	A|upstream_gene_variant|MODIFIER|OS01G0139700|OS01G0139700|transcript|OS01T0139700-01|protein_coding||c.-1729_-1710delCTTGTTAGTGAATAATGATG|||||1638|,A|downstream_gene_variant|MODIFIER|OS01G0139600|OS01G0139600|transcript|OS01T0139600-01|protein_coding||c.*3919_*3938delCATCATTATTCACTAACAAG|||||3618|,A|downstream_gene_variant|MODIFIER|OS01G0139900|OS01G0139900|transcript|OS01T0139900-01|protein_cod…
chr01	2153903	TACACATCAAAACTAAATAATAGCATCGACCAAAATAGTCGATTACTAACAGAGATTCTCGTAGCC	T	8683.94	0/0	0/0	1/1	0/0	0/0	1/1	1/1	1/1	0/0	1/1	0/0	1/1	1/1	0/0	0/0	0/0	0/0	0/0	0/0	1/1	0/0	0/0	0/0	0/0	T|upstream_gene_variant|MODIFIER|OS01G0140700|OS01G0140700|transcript|OS01T0140700-00|protein_coding||c.-422_-358delACACATCAAAACTAAATAATAGCATCGACCAAAATAGTCGATTACTAACAGAGATTCTCGTAGCC|||||422|,T|intergenic_region|MODIFIER|EPlOSAG00000030173-OS01G0140700|EPlOSAG00000030173-OS01G0140700|intergenic_region|EPlOSAG00000030173-OS01G0140700|||n.2153904_2153968delACACATCAAAACTAAATAATAGCATCGACCAAAATAGTCGATT…
chr01	2155331	CCTTCTTCTTCTTCTTCTTCTTCTTCTTCTTCTTCTTCTT	C	12793	0/0	0/0	1/1	0/0	0/0	1/1	1/1	1/1	0/0	1/1	0/0	1/1	1/1	0/0	0/0	0/0	0/0	0/0	0/0	1/1	0/0	0/0	0/0	0/0	C|downstream_gene_variant|MODIFIER|OS01G0140700|OS01G0140700|transcript|OS01T0140700-00|protein_coding||c.*53_*91delCTTCTTCTTCTTCTTCTTCTTCTTCTTCTTCTTCTTCTT|||||53|,C|intergenic_region|MODIFIER|OS01G0140700-EPlOSAG00000025305|OS01G0140700-EPlOSAG00000025305|intergenic_region|OS01G0140700-EPlOSAG00000025305|||n.2155332_2155370delCTTCTTCTTCTTCTTCTTCTTCTTCTTCTTCTTCTTCTT||||||
chr01	2177781	AGAGAGAGAGAGAGAGAGAGAGAGC	A	10609.5	0/0	0/0	1|1	0/0	0/0	1|1	1|1	1|1	0/0	1|1	0/0	0/0	1|1	0/0	0/0	0/0	0/0	0/0	0/0	1|1	0/0	0/0	0/0	0/0	A|upstream_gene_variant|MODIFIER|EPlOSAG00000023075|EPlOSAG00000023075|transcript|EPlOSAT00000024463|lincRNA||n.-4556_-4533delGAGAGAGAGAGAGAGAGAGAGAGC|||||4556|,A|downstream_gene_variant|MODIFIER|EPlOSAG00000023061|EPlOSAG00000023061|transcript|EPlOSAT00000024449|lincRNA||n.*4074_*4097delGCTCTCTCTCTCTCTCTCTCTCTC|||||4097|,A|intergenic_region|MODIFIER|EPlOSAG00000025305-EPlOSAG00000023061|EPlOSAG0…
chr01	2207954	C	CTGTTAGAAACAGAGGAGAATCCCACAGTAAGTTTTTCTT	14087	0/0	0/0	1/1	0/0	0/0	1/1	1/1	1/1	0/0	1/1	0/0	1/1	1/1	0/0	0/0	0/0	0/0	0/0	0/0	1/1	0/0	0/0	0/0	0/0	CTGTTAGAAACAGAGGAGAATCCCACAGTAAGTTTTTCTT|upstream_gene_variant|MODIFIER|EPlOSAG00000035801|EPlOSAG00000035801|transcript|EPlOSAT00000037189|lincRNA||n.-1027_-1026insTGTTAGAAACAGAGGAGAATCCCACAGTAAGTTTTTCTT|||||1026|,CTGTTAGAAACAGAGGAGAATCCCACAGTAAGTTTTTCTT|upstream_gene_variant|MODIFIER|EPlOSAG00000000815|EPlOSAG00000000815|transcript|EPlOSAT00000002203|lincRNA||n.-1049_-1048insTGTTAGAAACAGAGGAGAA…
chr01	2218587	T	TTTTAGTTGCTTTAGTAAATCATATTAATCCATTTTTCAAG	3584.21	0/0	0/0	1/1	0/0	0/0	1/1	1/1	0/0	0/0	1/1	0/0	1/1	1/1	0/0	0/0	0/0	0/0	0/0	0/0	1/1	0/0	0/0	0/0	0/0	TTTTAGTTGCTTTAGTAAATCATATTAATCCATTTTTCAAG|upstream_gene_variant|MODIFIER|EPlOSAG00000020478|EPlOSAG00000020478|transcript|EPlOSAT00000021866|lincRNA||n.-1871_-1870insCTTGAAAAATGGATTAATATGATTTACTAAAGCAACTAAA|||||1871|,TTTTAGTTGCTTTAGTAAATCATATTAATCCATTTTTCAAG|intron_variant|MODIFIER|OS01G0141100|OS01G0141100|transcript|OS01T0141100-02|protein_coding|2/7|c.189-875_189-874insCTTGAAAAATGGATTAATATGATT…
chr01	2243614	C	CAGGAAGATGAAGAATATTAATTTTTAGGAAGATGAATCCCCACACAAAAAAAATT	15115	0/0	0/0	1/1	0/0	0/0	1/1	1/1	1/1	0/0	1/1	0/0	1/1	1/1	0/0	0/0	0/0	0/0	0/0	0/0	1/1	0/0	0/0	0/0	0/0	CAGGAAGATGAAGAATATTAATTTTTAGGAAGATGAATCCCCACACAAAAAAAATT|upstream_gene_variant|MODIFIER|EPlOSAG00000039129|EPlOSAG00000039129|transcript|EPlOSAT00000040517|lincRNA||n.-4176_-4175insAATTTTTTTTGTGTGGGGATTCATCTTCCTAAAAATTAATATTCTTCATCTTCCT|||||4176|,CAGGAAGATGAAGAATATTAATTTTTAGGAAGATGAATCCCCACACAAAAAAAATT|upstream_gene_variant|MODIFIER|EPlOSAG00000040409|EPlOSAG00000040409|transcript|EPlOSAT00000041…
chr01	2262078	GTCTGGGGTTTTGGGGGGTGA	G	12286.9	0/0	0/0	1|1	0/0	0/0	1|1	1|1	1|1	0/0	1|1	0/0	1|1	1|1	0/0	0/0	0/0	0/0	0/0	0/0	1|1	0/0	0/0	0/0	0/0	G|downstream_gene_variant|MODIFIER|EPlOSAG00000023148|EPlOSAG00000023148|transcript|EPlOSAT00000024536|lincRNA||n.*2324_*2343delTCTGGGGTTTTGGGGGGTGA|||||2324|,G|downstream_gene_variant|MODIFIER|EGY2|OS01G0142100|transcript|OS01T0142100-01|protein_coding||c.*4552_*4571delTCACCCCCCAAAACCCCAGA|||||4202|,G|downstream_gene_variant|MODIFIER|EGY2|OS01G0142100|transcript|OS01T0142100-02|protein_coding||c…
chr01	2335555	CAAGGTCTATAACGACGCAGATCAAAGG	C	7337.94	0/0	0/0	1|1	0/0	0/0	1|1	1|1	1|1	0/0	1|1	0/0	1|1	1|1	0/0	0/0	0/0	0/0	0/0	0/0	1|1	0/0	0/0	0/0	0/0	C|downstream_gene_variant|MODIFIER|OS01G0142950|OS01G0142950|transcript|OS01T0142950-01|protein_coding||c.*3937_*3963delCCTTTGATCTGCGTCGTTATAGACCTT|||||2610|WARNING_TRANSCRIPT_NO_START_CODON,C|intergenic_region|MODIFIER|EPlOSAG00000020336-OS01G0142950|EPlOSAG00000020336-OS01G0142950|intergenic_region|EPlOSAG00000020336-OS01G0142950|||n.2335556_2335582delAAGGTCTATAACGACGCAGATCAAAGG||||||
chr01	2344093	TGTCATTCAGCCATGGCAGGTCGGCAGCTCAACGGCGA	T	11866.9	0/0	0/0	1|1	0/0	0/0	1|1	1|1	1|1	0/0	1|1	0/0	1/1	1|1	0/0	0/0	0/0	0/0	0/0	0/0	1|1	0/0	0/0	0/0	0/0	T|upstream_gene_variant|MODIFIER|OS01G0142950|OS01G0142950|transcript|OS01T0142950-01|protein_coding||c.-4363_-4327delTCGCCGTTGAGCTGCCGACCTGCCATGGCTGAATGAC|||||2046|WARNING_TRANSCRIPT_NO_START_CODON,T|upstream_gene_variant|MODIFIER|EPlOSAG00000009857|EPlOSAG00000009857|transcript|EPlOSAT00000011245|lincRNA||n.-4756_-4720delGTCATTCAGCCATGGCAGGTCGGCAGCTCAACGGCGA|||||4756|,T|downstream_gene_variant|…
chr01	2369533	A	AATCAACGAGGTACACGGCGATCCT	358.46	0/0	0/0	0/0	0/0	0/0	./.	./.	./.	0/0	./.	0/0	./.	1/1	0/0	0/0	0/0	0/0	0/0	0/0	./.	0/0	0/0	0/0	0/0	AATCAACGAGGTACACGGCGATCCT|upstream_gene_variant|MODIFIER|OS01G0143750|OS01G0143750|transcript|OS01T0143750-00|protein_coding||c.-2857_-2856insATCAACGAGGTACACGGCGATCCT|||||2802|,AATCAACGAGGTACACGGCGATCCT|downstream_gene_variant|MODIFIER|EPlOSAG00000015626|EPlOSAG00000015626|transcript|EPlOSAT00000017014|lincRNA||n.*204_*205insATCAACGAGGTACACGGCGATCCT|||||205|,AATCAACGAGGTACACGGCGATCCT|downstream_g…
chr01	2370445	GGTACGACTCGAGGAAGATGTACCAGACAATGACCAAGCGGGTGACAAGGAGGTCGAGATTAAAGCCATGGATAAGGATGTTGTTGGCAGCGTTGCTGCCAATGGGACCT	G	7726.58	0/0	0/0	1/1	0/0	0/0	1/1	1/1	1/1	0/0	1/1	0/0	1/1	1/1	1/1	0/0	0/0	0/0	0/0	0/0	1/1	0/0	0/0	0/0	0/0	G|upstream_gene_variant|MODIFIER|OS01G0143750|OS01G0143750|transcript|OS01T0143750-00|protein_coding||c.-1944_-1836del|||||1890|,G|downstream_gene_variant|MODIFIER|EPlOSAG00000015626|EPlOSAG00000015626|transcript|EPlOSAT00000017014|lincRNA||n.*1117_*1225del|||||1117|,G|downstream_gene_variant|MODIFIER|EPlOSAG00000044528|EPlOSAG00000044528|transcript|EPlOSAT00000045916|lincRNA||n.*1464_*1572del|||…
chr01	2370829	A	AGCATCCTGAAGAGGGCGAAGGAGAGGCATAGGTCCCGCCGCCACGATCCCCGCCATCGCCACTCAACCTCAACTGCAGCAGCTTCC	17377.6	0/0	0/0	1|1	0/0	0/0	1|1	1|1	1|1	0/0	1|1	0/0	1|1	1|1	1|1	0/0	0/0	0/0	0/0	0/0	1|1	0/0	0/0	0/0	0/0	AGCATCCTGAAGAGGGCGAAGGAGAGGCATAGGTCCCGCCGCCACGATCCCCGCCATCGCCACTCAACCTCAACTGCAGCAGCTTCC|upstream_gene_variant|MODIFIER|OS01G0143750|OS01G0143750|transcript|OS01T0143750-00|protein_coding||c.-1561_-1560insGCATCCTGAAGAGGGCGAAGGAGAGGCATAGGTCCCGCCGCCACGATCCCCGCCATCGCCACTCAACCTCAACTGCAGCAGCTTCC|||||1506|,AGCATCCTGAAGAGGGCGAAGGAGAGGCATAGGTCCCGCCGCCACGATCCCCGCCATCGCCACTCAACCTCAACTGCAGCAGCTTCC|downstream…
chr01	2383950	GACAGCCATTGGTGTGTGCATGATTGCAACATTGGTT	G	15549.6	0/0	0/0	1|1	0/0	0/0	1|1	1|1	1|1	0/0	1|1	0/0	1|1	1|1	1|1	0/0	0/0	0/0	0/0	0/0	1/1	0/0	0/0	0/0	0/0	G|splice_region_variant&intron_variant|LOW|OS01G0144100|OS01G0144100|transcript|OS01T0144100-01|protein_coding|5/5|c.545+7_545+42delAACCAATGTTGCAATCATGCACACACCAATGGCTGT||||||,G|upstream_gene_variant|MODIFIER|OS01G0144000|OS01G0144000|transcript|OS01T0144000-01|protein_coding||c.-1403_-1368delAACCAATGTTGCAATCATGCACACACCAATGGCTGT|||||1367|WARNING_TRANSCRIPT_NO_START_CODON,G|upstream_gene_variant|MO…
chr01	2385919	A	ATATATCACATTCAGTAGTTCTAGATTTT	25714.6	0/0	0/0	1|1	0/0	0/0	1|1	1|1	1/1	0/0	1|1	0/0	1|1	1|1	1|1	0/0	0/0	0/0	0/0	0/0	1|1	0/0	0/0	0/0	0/0	ATATATCACATTCAGTAGTTCTAGATTTT|upstream_gene_variant|MODIFIER|OS01G0144000|OS01G0144000|transcript|OS01T0144000-01|protein_coding||c.-3337_-3336insAAAATCTAGAACTACTGAATGTGATATA|||||3336|WARNING_TRANSCRIPT_NO_START_CODON,ATATATCACATTCAGTAGTTCTAGATTTT|upstream_gene_variant|MODIFIER|OS01G0144100|OS01G0144100|transcript|OS01T0144100-01|protein_coding||c.-393_-392insAAAATCTAGAACTACTGAATGTGATATA|||||327|…
chr01	2386121	ATTATTTCAAAATGAAACTATTTC	A	9027.36	0/0	0/0	1|1	0/0	0/0	1|1	1|1	1|1	0/0	1|1	0/0	1|1	1|1	1|1	0/0	0/0	0/0	0/0	0/0	1|1	0/0	0/0	0/0	0/0	A|upstream_gene_variant|MODIFIER|OS01G0144000|OS01G0144000|transcript|OS01T0144000-01|protein_coding||c.-3561_-3539delGAAATAGTTTCATTTTGAAATAA|||||3538|WARNING_TRANSCRIPT_NO_START_CODON,A|upstream_gene_variant|MODIFIER|OS01G0144100|OS01G0144100|transcript|OS01T0144100-01|protein_coding||c.-617_-595delGAAATAGTTTCATTTTGAAATAA|||||529|,A|upstream_gene_variant|MODIFIER|OS01G0144200|OS01G0144200|transc…
chr01	2399625	GGGAAGGACGCAGCCGCGCTGCCGGTGGTGA	G	9103.13	0/0	0/0	1/1	0/0	0/0	1/1	1/1	1/1	0/0	1/1	0/0	1/1	1/1	1/1	0/0	0/0	0/0	0/0	0/0	1/1	0/0	0/0	0/0	0/0	G|upstream_gene_variant|MODIFIER|OS01G0144340|OS01G0144340|transcript|OS01T0144340-00|protein_coding||c.-2508_-2479delTCACCACCGGCAGCGCGGCTGCGTCCTTCC|||||2331|,G|upstream_gene_variant|MODIFIER|OS01G0144600|OS01G0144600|transcript|OS01T0144600-01|protein_coding||c.-3773_-3744delGGAAGGACGCAGCCGCGCTGCCGGTGGTGA|||||3650|,G|downstream_gene_variant|MODIFIER|OS01G0144380|OS01G0144380|transcript|OS01T0144…
chr01	2403190	C	CTGACATGTGGGCCCACGTGGGTGGTTCGTTTCTCCCTTCGCCGTA	24309.6	0/0	0/0	1/1	0/0	0/0	1/1	1/1	1/1	0/0	1/1	0/0	1/1	1/1	1/1	0/0	0/0	0/0	0/0	0/0	1/1	0/0	0/0	0/0	0/0	CTGACATGTGGGCCCACGTGGGTGGTTCGTTTCTCCCTTCGCCGTA|upstream_gene_variant|MODIFIER|OS01G0144500|OS01G0144500|transcript|OS01T0144500-00|protein_coding||c.-855_-854insTACGGCGAAGGGAGAAACGAACCACCCACGTGGGCCCACATGTCA|||||855|WARNING_TRANSCRIPT_NO_START_CODON,CTGACATGTGGGCCCACGTGGGTGGTTCGTTTCTCCCTTCGCCGTA|upstream_gene_variant|MODIFIER|OS01G0144600|OS01G0144600|transcript|OS01T0144600-01|protein_coding||c.-…
chr01	2410155	T	TAAGTAATATTAGAAGAGGAG	1780.99	0/0	0/0	1|1	0/0	0/0	./.	1|1	./.	0/0	./.	0/0	./.	1|1	./.	0/0	0/0	0/0	0/0	0/0	./.	0/0	0/0	0/0	0/0	TAAGTAATATTAGAAGAGGAG|upstream_gene_variant|MODIFIER|EPlOSAG00000024559|EPlOSAG00000024559|transcript|EPlOSAT00000025947|lincRNA||n.-3977_-3976insAAGTAATATTAGAAGAGGAG|||||3976|,TAAGTAATATTAGAAGAGGAG|upstream_gene_variant|MODIFIER|OS01G0144800|OS01G0144800|transcript|OS01T0144800-01|protein_coding||c.-4197_-4196insAAGTAATATTAGAAGAGGAG|||||4115|,TAAGTAATATTAGAAGAGGAG|downstream_gene_variant|MODIFIE…
chr01	2410156	A	AAGTAATATTAGAAGAGGAGACTAGAGTCCATATAGAAATACAATTAGGAAATAG	1392.48	0/0	0/0	./.	0/0	0/0	./.	./.	./.	0/0	./.	0/0	./.	./.	1/1	0/0	0/0	0/0	0/0	0/0	./.	0/0	0/0	0/0	0/0	AAGTAATATTAGAAGAGGAGACTAGAGTCCATATAGAAATACAATTAGGAAATAG|upstream_gene_variant|MODIFIER|EPlOSAG00000024559|EPlOSAG00000024559|transcript|EPlOSAT00000025947|lincRNA||n.-3976_-3975insAGTAATATTAGAAGAGGAGACTAGAGTCCATATAGAAATACAATTAGGAAATAG|||||3975|,AAGTAATATTAGAAGAGGAGACTAGAGTCCATATAGAAATACAATTAGGAAATAG|upstream_gene_variant|MODIFIER|OS01G0144800|OS01G0144800|transcript|OS01T0144800-01|protein_coding…
chr01	2416652	ATGATGTGCTTGTTCATCGCACCAGT	A	24293.6	0/0	0/0	1/1	0/0	0/0	1/1	1/1	1/1	0/0	1/1	0/0	1/1	1/1	1/1	0/0	0/0	0/0	0/0	0/0	1/1	0/0	0/0	0/0	0/0	A|5_prime_UTR_variant|MODIFIER|OS01G0144900|OS01G0144900|transcript|OS01T0144900-01|protein_coding|1/1|c.-125_-101delGTGCTTGTTCATCGCACCAGTTGAT|||||101|INFO_REALIGN_3_PRIME,A|downstream_gene_variant|MODIFIER|EPlOSAG00000024559|EPlOSAG00000024559|transcript|EPlOSAT00000025947|lincRNA||n.*2454_*2478delTGATGTGCTTGTTCATCGCACCAGT|||||2454|,A|downstream_gene_variant|MODIFIER|OS01G0144800|OS01G0144800|tr…
chr01	2459680	C	CGATGAGTGGCATAACAACCTTGAGTTAGT	115.11	0/0	0/0	1/1	0/0	0/0	./.	0/0	./.	0/0	0/0	0/0	./.	0/0	./.	0/0	0/0	0/0	0/0	0/0	./.	0/0	0/0	0/0	0/0	CGATGAGTGGCATAACAACCTTGAGTTAGT|downstream_gene_variant|MODIFIER|OS01G0145600|OS01G0145600|transcript|OS01T0145600-01|protein_coding||c.*3530_*3531insGATGAGTGGCATAACAACCTTGAGTTAGT|||||3186|,CGATGAGTGGCATAACAACCTTGAGTTAGT|downstream_gene_variant|MODIFIER|EPlOSAG00000017991|EPlOSAG00000017991|transcript|EPlOSAT00000019379|lincRNA||n.*1757_*1758insGATGAGTGGCATAACAACCTTGAGTTAGT|||||1758|,CGATGAGTGGCAT…
chr01	2542454	GAGCGAGAGAGGAAGGGCGACGAGACGGC	G	4879.31	0/0	0/0	./.	0/0	0/0	1|1	./.	./.	.	./.	0/0	1|1	./.	0/0	0/0	0/0	0/0	0/0	0/0	0/0	0/0	.	0/0	0/0	G|5_prime_UTR_variant|MODIFIER|OS01G0146801|OS01G0146801|transcript|OS01T0146801-00|protein_coding|1/3|c.-54_-27delGCCGTCTCGTCGCCCTTCCTCTCTCGCT|||||27|
chr01	2549378	T	TATACACACACACACACACACAC,TATACACACACACACACACACACAC	15230.1	0/0	0/0	1/1	0/0	0/0	1/1	2/2	./.	0/0	1/1	0/0	1/1	1/1	1/1	0/0	0/0	0/0	0/0	0/0	1/1	0/0	0/0	0/0	0/0	TATACACACACACACACACACAC|upstream_gene_variant|MODIFIER|EPlOSAG00000029069|EPlOSAG00000029069|transcript|EPlOSAT00000030457|lincRNA||n.-1159_-1158insGTGTGTGTGTGTGTGTGTGTAT|||||1159|,TATACACACACACACACACACACAC|upstream_gene_variant|MODIFIER|EPlOSAG00000029069|EPlOSAG00000029069|transcript|EPlOSAT00000030457|lincRNA||n.-1159_-1158insGTGTGTGTGTGTGTGTGTGTGTAT|||||1159|,TATACACACACACACACACACAC|upstream_…
chr01	2567361	AATCTTGGGGATTTTTTGGGGGAGTCAATTTTGTAGATTACATAAAGATAG	A	15625.6	0/0	0/0	1|1	0/0	0/0	1|1	1|1	1|1	0/0	1|1	0/0	1|1	1|1	1|1	0/0	0/0	0/0	0/0	0/0	1|1	0/0	0/0	0/0	0/0	A|5_prime_UTR_variant|MODIFIER|OS01G0147250|OS01G0147250|transcript|OS01T0147250-01|protein_coding|1/1|c.-252_-203delCTATCTTTATGTAATCTACAAAATTGACTCCCCCAAAAAATCCCCAAGAT|||||203|WARNING_TRANSCRIPT_INCOMPLETE,A|upstream_gene_variant|MODIFIER|OS01G0147300|OS01G0147300|transcript|OS01T0147300-01|protein_coding||c.-689_-640delATCTTGGGGATTTTTTGGGGGAGTCAATTTTGTAGATTACATAAAGATAG|||||689|,A|downstream_gene…
chr01	2570010	CTGTGAATTTGTGACAGACCAACATTTCTATTGT	C	23211.6	0/0	0/0	1/1	0/0	0/0	1/1	1/1	1/1	0/0	1/1	0/0	1/1	1/1	1/1	0/0	0/0	0/0	0/0	0/0	1/1	0/0	0/0	0/0	0/0	C|splice_region_variant|LOW|OS01G0147300|OS01G0147300|transcript|OS01T0147300-01|protein_coding|4/4|c.*661_*693delTGTGAATTTGTGACAGACCAACATTTCTATTGT||||||,C|3_prime_UTR_variant|MODIFIER|OS01G0147300|OS01G0147300|transcript|OS01T0147300-01|protein_coding|4/4|c.*661_*693delTGTGAATTTGTGACAGACCAACATTTCTATTGT|||||661|,C|upstream_gene_variant|MODIFIER|OS01G0147250|OS01G0147250|transcript|OS01T0147250-01…
chr01	2572312	GAGGATGTTTTCAAAAAAAAAAAAATAGTATGAGGATTCTAAGGTTTTTCGGCTATA	G	5698.52	0/0	0/0	./.	0/0	0/0	0/0	1|1	1|1	0/0	1|1	0/0	0/0	1|1	1|1	0/0	0/0	0/0	0/0	0/0	0/0	0/0	0/0	0/0	0/0	G|upstream_gene_variant|MODIFIER|OS01G0147250|OS01G0147250|transcript|OS01T0147250-01|protein_coding||c.-5209_-5154delTATAGCCGAAAAACCTTAGAATCCTCATACTATTTTTTTTTTTTTGAAAACATCCT|||||2458|WARNING_TRANSCRIPT_INCOMPLETE,G|upstream_gene_variant|MODIFIER|OS01G0147400|OS01G0147400|transcript|OS01T0147400-00|protein_coding||c.-1358_-1303delTATAGCCGAAAAACCTTAGAATCCTCATACTATTTTTTTTTTTTTGAAAACATCCT|||||1303|,…
chr01	2572619	A	AGTAGTATTTTTGAACGGAAAGATCAAAG	18495.6	0/0	0/0	1/1	0/0	0/0	1/1	1/1	1/1	0/0	1/1	0/0	1/1	1/1	1/1	0/0	0/0	0/0	0/0	0/0	1/1	0/0	0/0	0/0	0/0	AGTAGTATTTTTGAACGGAAAGATCAAAG|upstream_gene_variant|MODIFIER|OS01G0147250|OS01G0147250|transcript|OS01T0147250-01|protein_coding||c.-5461_-5460insCTTTGATCTTTCCGTTCAAAAATACTAC|||||2765|WARNING_TRANSCRIPT_INCOMPLETE,AGTAGTATTTTTGAACGGAAAGATCAAAG|upstream_gene_variant|MODIFIER|OS01G0147400|OS01G0147400|transcript|OS01T0147400-00|protein_coding||c.-1610_-1609insCTTTGATCTTTCCGTTCAAAAATACTAC|||||1610|,…
chr01	2573980	CTCCTTCTCGACGCACGAGTCCTTCTCCGTCTCGCCGCCGCCGGGGCCCTT	C	8667.56	0/0	0/0	1|1	0/0	0/0	1|1	1|1	1|1	0/0	1|1	0/0	1|1	1|1	1|1	0/0	0/0	0/0	0/0	0/0	1|1	0/0	0/0	0/0	0/0	C|frameshift_variant|HIGH|OS01G0147600|OS01G0147600|transcript|OS01T0147600-00|protein_coding|4/6|c.451_500delAAGGGCCCCGGCGGCGGCGAGACGGAGAAGGACTCGTGCGTCGAGAAGGA|p.Lys151fs|500/780|451/780|151/259||,C|upstream_gene_variant|MODIFIER|OS01G0147250|OS01G0147250|transcript|OS01T0147250-01|protein_coding||c.-6871_-6822delAAGGGCCCCGGCGGCGGCGAGACGGAGAAGGACTCGTGCGTCGAGAAGGA|||||4126|WARNING_TRANSCRIPT_INCO…
chr01	2574374	G	GCCCAAATGAATCTTTTACGGTTTTATTTATAT	10126.7	0/0	0/0	1|1	0/0	0/0	1|1	1|1	1|1	0/0	1|1	0/0	1|1	1|1	1|1	0/0	0/0	0/0	0/0	0/0	1|1	0/0	0/0	0/0	0/0	GCCCAAATGAATCTTTTACGGTTTTATTTATAT|upstream_gene_variant|MODIFIER|OS01G0147250|OS01G0147250|transcript|OS01T0147250-01|protein_coding||c.-7216_-7215insATATAAATAAAACCGTAAAAGATTCATTTGGG|||||4520|WARNING_TRANSCRIPT_INCOMPLETE,GCCCAAATGAATCTTTTACGGTTTTATTTATAT|upstream_gene_variant|MODIFIER|OS01G0147400|OS01G0147400|transcript|OS01T0147400-00|protein_coding||c.-3365_-3364insATATAAATAAAACCGTAAAAGATTCAT…
chr01	2574709	G	GGTAAATAGTTGCACATTGGGAGGA	18608.6	0/0	0/0	1|1	0/0	0/0	1|1	1|1	1|1	0/0	1|1	0/0	1|1	1|1	1|1	0/0	0/0	0/0	0/0	0/0	1|1	0/0	0/0	0/0	0/0	GGTAAATAGTTGCACATTGGGAGGA|upstream_gene_variant|MODIFIER|OS01G0147250|OS01G0147250|transcript|OS01T0147250-01|protein_coding||c.-7551_-7550insTCCTCCCAATGTGCAACTATTTAC|||||4855|WARNING_TRANSCRIPT_INCOMPLETE,GGTAAATAGTTGCACATTGGGAGGA|upstream_gene_variant|MODIFIER|OS01G0147400|OS01G0147400|transcript|OS01T0147400-00|protein_coding||c.-3700_-3699insTCCTCCCAATGTGCAACTATTTAC|||||3700|,GGTAAATAGTTGCACA…
chr01	2575905	A	ACACAGAAGAGAGTCAGTATC,ACACAGAAGAGAGTC	1927	0/0	0/0	./.	0/0	0/0	./.	./.	./.	0/0	1|1	0/0	./.	2|2	./.	0/0	0/0	0/0	0/0	0/0	./.	0/0	0/0	0/0	0/0	ACACAGAAGAGAGTC|upstream_gene_variant|MODIFIER|OS01G0147400|OS01G0147400|transcript|OS01T0147400-00|protein_coding||c.-4896_-4895insGACTCTCTTCTGTG|||||4896|,ACACAGAAGAGAGTCAGTATC|upstream_gene_variant|MODIFIER|OS01G0147400|OS01G0147400|transcript|OS01T0147400-00|protein_coding||c.-4896_-4895insGATACTGACTCTCTTCTGTG|||||4896|,ACACAGAAGAGAGTC|upstream_gene_variant|MODIFIER|OS01G0147650|OS01G0147650|…
chr01	2577177	CTGCAGCTGATGAGGTGTCTCAACTTCAGA	C	19171.6	0/0	0/0	1|1	0/0	0/0	1|1	1|1	1|1	0/0	1|1	0/0	1|1	1|1	1|1	0/0	0/0	0/0	0/0	0/0	1|1	0/0	0/0	0/0	0/0	C|frameshift_variant|HIGH|OS01G0147600|OS01G0147600|transcript|OS01T0147600-00|protein_coding|2/6|c.163_191delTCTGAAGTTGAGACACCTCATCAGCTGCA|p.Ser55fs|191/780|163/780|55/259||,C|upstream_gene_variant|MODIFIER|OS01G0147650|OS01G0147650|transcript|OS01T0147650-00|lincRNA||n.-1642_-1614delTCTGAAGTTGAGACACCTCATCAGCTGCA|||||1614|,C|upstream_gene_variant|MODIFIER|EPlOSAG00000033692|EPlOSAG00000033692|tr…
chr01	2588773	G	GCGGCGGCGGCGGCGGCGGAGTTACTCC	27314.2	0/0	0/0	1|1	0/0	0/0	1/1	1|1	1|1	0/0	1|1	0/0	1|1	1|1	1|1	0/0	0/0	0/0	0/0	0/0	1|1	0/0	0/0	0/0	0/0	GCGGCGGCGGCGGCGGCGGAGTTACTCC|upstream_gene_variant|MODIFIER|OS01G0147800|OS01G0147800|transcript|OS01T0147800-01|protein_coding||c.-1264_-1263insGGAGTAACTCCGCCGCCGCCGCCGCCG|||||1227|WARNING_TRANSCRIPT_NO_START_CODON,GCGGCGGCGGCGGCGGCGGAGTTACTCC|upstream_gene_variant|MODIFIER|OS01G0147950|OS01G0147950|transcript|OS01T0147950-00|lincRNA||n.-1124_-1123insCGGCGGCGGCGGCGGCGGAGTTACTCC|||||1123|,GCGGCGG…
chr01	2591859	GGCTAGCTTGAAAAGATGGCAT	G	20598.6	0/0	0/0	1/1	0/0	0/0	1/1	1/1	1/1	0/0	1/1	0/0	1/1	1/1	1/1	0/0	0/0	0/0	0/0	0/0	1/1	0/0	0/0	0/0	0/0	G|upstream_gene_variant|MODIFIER|OS01G0147800|OS01G0147800|transcript|OS01T0147800-01|protein_coding||c.-4370_-4350delATGCCATCTTTTCAAGCTAGC|||||4313|WARNING_TRANSCRIPT_NO_START_CODON,G|downstream_gene_variant|MODIFIER|EPlOSAG00000018278|EPlOSAG00000018278|transcript|EPlOSAT00000019666|lincRNA||n.*4760_*4780delGCTAGCTTGAAAAGATGGCAT|||||4760|,G|downstream_gene_variant|MODIFIER|EPlOSAG00000015906|EP…
chr01	2592938	A	AGGAACCAAACGACGGCGACGAAC	9883.39	0/0	0/0	1|1	0/0	0/0	1|1	1|1	1|1	0/0	1|1	0/0	1|1	1|1	1|1	0/0	0/0	0/0	0/0	0/0	1|1	0/0	0/0	0/0	0/0	AGGAACCAAACGACGGCGACGAAC|downstream_gene_variant|MODIFIER|EPlOSAG00000015906|EPlOSAG00000015906|transcript|EPlOSAT00000017294|lincRNA||n.*4563_*4564insGGAACCAAACGACGGCGACGAAC|||||4564|,AGGAACCAAACGACGGCGACGAAC|intron_variant|MODIFIER|TPI|OS01G0147900|transcript|OS01T0147900-01|protein_coding|1/8|c.39+540_39+541insGTTCGTCGCCGTCGTTTGGTTCC||||||,AGGAACCAAACGACGGCGACGAAC|intron_variant|MODIFIER|OS01G…
chr01	2594984	G	GTATTAGGGAATAAATAAATGGTTAGTA	12701.3	0/0	0/0	1|1	0/0	0/0	./.	1|1	1|1	0/0	1|1	0/0	1|1	1|1	1|1	0/0	0/0	0/0	0/0	0/0	1|1	0/0	0/0	0/0	0/0	GTATTAGGGAATAAATAAATGGTTAGTA|upstream_gene_variant|MODIFIER|TPI|OS01G0147900|transcript|OS01T0147900-01|protein_coding||c.-1468_-1467insTACTAACCATTTATTTATTCCCTAATA|||||1417|,GTATTAGGGAATAAATAAATGGTTAGTA|upstream_gene_variant|MODIFIER|OS01G0148000|OS01G0148000|transcript|OS01T0148000-00|protein_coding||c.-4866_-4865insTATTAGGGAATAAATAAATGGTTAGTA|||||4747|,GTATTAGGGAATAAATAAATGGTTAGTA|downstream_ge…
chr01	2597344	T	TAATCAGAAATTGTCATGGTC	2195.06	0/0	0/0	./.	0/0	0/0	1|1	1|1	./.	0/0	./.	0/0	1|1	./.	./.	0/0	0/0	0/0	0/0	0/0	1|1	0/0	0/0	0/0	0/0	TAATCAGAAATTGTCATGGTC|upstream_gene_variant|MODIFIER|TPI|OS01G0147900|transcript|OS01T0147900-01|protein_coding||c.-3828_-3827insGACCATGACAATTTCTGATT|||||3777|,TAATCAGAAATTGTCATGGTC|upstream_gene_variant|MODIFIER|OS01G0148000|OS01G0148000|transcript|OS01T0148000-00|protein_coding||c.-2506_-2505insAATCAGAAATTGTCATGGTC|||||2387|,TAATCAGAAATTGTCATGGTC|downstream_gene_variant|MODIFIER|OS01G0147950|OS…
chr01	2617119	A	ATTTCCTGATCTTGATTAGTTTATTGATT,ATTT	2826.03	0/0	0/0	./.	0/0	0/0	./.	2|2	1/1	0/0	1/1	0/0	./.	1/1	./.	0/0	0/0	0/0	0/0	0/0	2|2	0/0	0/0	0/0	0/0	ATTT|upstream_gene_variant|MODIFIER|EPlOSAG00000038394|EPlOSAG00000038394|transcript|EPlOSAT00000039782|lincRNA||n.-669_-668insAAA|||||669|,ATTTCCTGATCTTGATTAGTTTATTGATT|upstream_gene_variant|MODIFIER|EPlOSAG00000038394|EPlOSAG00000038394|transcript|EPlOSAT00000039782|lincRNA||n.-669_-668insAATCAATAAACTAATCAAGATCAGGAAA|||||669|,ATTT|downstream_gene_variant|MODIFIER|OS01G0148050|OS01G0148050|trans…
chr01	2635200	ATATTGTTGTAAAAACTATAAATTGTT	A	18179.6	0/0	0/0	1/1	0/0	0/0	1/1	1/1	1/1	0/0	1/1	0/0	1/1	1/1	1/1	0/0	0/0	0/0	0/0	0/0	1/1	0/0	0/0	0/0	0/0	A|intron_variant|MODIFIER|OS01G0148400|OS01G0148400|transcript|OS01T0148400-01|protein_coding|8/10|c.882+96_882+121delTATTGTTGTAAAAACTATAAATTGTT||||||
chr01	2638128	GAACCAAAGGATTTTATAGAAGTCA	G	16348.6	0/0	0/0	1/1	0/0	0/0	1/1	1/1	1/1	0/0	1/1	0/0	1/1	1/1	1/1	0/0	0/0	0/0	0/0	0/0	1/1	0/0	0/0	0/0	0/0	G|downstream_gene_variant|MODIFIER|OS01G0148400|OS01G0148400|transcript|OS01T0148400-01|protein_coding||c.*681_*704delAACCAAAGGATTTTATAGAAGTCA|||||300|,G|downstream_gene_variant|MODIFIER|OS01G0148500|OS01G0148500|transcript|OS01T0148500-01|protein_coding||c.*5256_*5279delTGACTTCTATAAAATCCTTTGGTT|||||2871|,G|intergenic_region|MODIFIER|OS01G0148400-OS01G0148500|OS01G0148400-OS01G0148500|intergenic_…
chr01	2649528	ATATAAGTTGATATGATTGGAGGGAATATGATATGGTTGGAATATGCCT	A	16336.6	0/0	0/0	1/1	0/0	0/0	1/1	1/1	1/1	0/0	1/1	0/0	1/1	1/1	1/1	0/0	0/0	0/0	0/0	0/0	1/1	0/0	0/0	0/0	0/0	A|upstream_gene_variant|MODIFIER|OS01G0148500|OS01G0148500|transcript|OS01T0148500-01|protein_coding||c.-4969_-4922delAGGCATATTCCAACCATATCATATTCCCTCCAATCATATCAACTTATA|||||4864|,A|upstream_gene_variant|MODIFIER|OS01G0148700|OS01G0148700|transcript|OS01T0148700-01|protein_coding||c.-3170_-3123delTATAAGTTGATATGATTGGAGGGAATATGATATGGTTGGAATATGCCT|||||3119|,A|upstream_gene_variant|MODIFIER|OS01G0148700…
chr01	2656107	GTCAACGGTGTCATCTATTAAAAAACGGAGGTAGTATATT	G	16369.6	0/0	0/0	1/1	0/0	0/0	1/1	1/1	1/1	0/0	1/1	0/0	1|1	1/1	1/1	0/0	0/0	0/0	0/0	0/0	1/1	0/0	0/0	0/0	0/0	G|downstream_gene_variant|MODIFIER|OS01G0148700|OS01G0148700|transcript|OS01T0148700-01|protein_coding||c.*813_*851delTCAACGGTGTCATCTATTAAAAAACGGAGGTAGTATATT|||||544|,G|downstream_gene_variant|MODIFIER|EPlOSAG00000046000|EPlOSAG00000046000|transcript|EPlOSAT00000047388|lincRNA||n.*2454_*2492delAATATACTACCTCCGTTTTTTAATAGATGACACCGTTGA|||||2492|,G|downstream_gene_variant|MODIFIER|OS01G0148700|OS01G0…
chr01	2658452	G	GATCTAGATGACACGTTATGACAAGTTTTAGGACTTGGTTATACATAGTAAAATGTATGGACGGTCCTTAAATTTATAGAGATGTGTT	33566.6	0/0	0/0	1/1	0/0	0/0	1/1	1/1	1/1	0/0	1/1	0/0	1/1	1/1	1/1	0/0	0/0	0/0	0/0	0/0	1/1	0/0	0/0	0/0	0/0	GATCTAGATGACACGTTATGACAAGTTTTAGGACTTGGTTATACATAGTAAAATGTATGGACGGTCCTTAAATTTATAGAGATGTGTT|downstream_gene_variant|MODIFIER|OS01G0148700|OS01G0148700|transcript|OS01T0148700-01|protein_coding||c.*3157_*3158insATCTAGATGACACGTTATGACAAGTTTTAGGACTTGGTTATACATAGTAAAATGTATGGACGGTCCTTAAATTTATAGAGATGTGTT|||||2889|,GATCTAGATGACACGTTATGACAAGTTTTAGGACTTGGTTATACATAGTAAAATGTATGGACGGTCCTTAAATTTATAGAGATGTGTT|downs…
chr01	2664754	G	GCCTGCGCCCGCCACCCACGC	16743.3	0/0	0/0	1|1	0/0	0/0	1|1	1|1	1|1	0/0	1|1	0/0	1|1	1|1	1|1	0/0	0/0	0/0	0/0	0/0	1|1	0/0	0/0	0/0	0/0	GCCTGCGCCCGCCACCCACGC|downstream_gene_variant|MODIFIER|OS01G0149200|OS01G0149200|transcript|OS01T0149200-01|protein_coding||c.*2352_*2353insGCGTGGGTGGCGGGCGCAGG|||||330|,GCCTGCGCCCGCCACCCACGC|downstream_gene_variant|MODIFIER|OS01G0149350|OS01G0149350|transcript|OS01T0149350-00|protein_coding||c.*5197_*5198insGCGTGGGTGGCGGGCGCAGG|||||4496|,GCCTGCGCCCGCCACCCACGC|intergenic_region|MODIFIER|EPlOSAG00…
chr01	2664761	G	GCTCCCCTGCCGGCCGCCGCCTGCGCCCACCTGCTCCATGGGTC	22932.6	0/0	0/0	1|1	0/0	0/0	1|1	1|1	1|1	0/0	1|1	0/0	1|1	1|1	1|1	0/0	0/0	0/0	0/0	0/0	1|1	0/0	0/0	0/0	0/0	GCTCCCCTGCCGGCCGCCGCCTGCGCCCACCTGCTCCATGGGTC|downstream_gene_variant|MODIFIER|OS01G0149200|OS01G0149200|transcript|OS01T0149200-01|protein_coding||c.*2345_*2346insGACCCATGGAGCAGGTGGGCGCAGGCGGCGGCCGGCAGGGGAG|||||323|,GCTCCCCTGCCGGCCGCCGCCTGCGCCCACCTGCTCCATGGGTC|downstream_gene_variant|MODIFIER|OS01G0149350|OS01G0149350|transcript|OS01T0149350-00|protein_coding||c.*5190_*5191insGACCCATGGAGCAGGTGGGC…
chr01	2701823	A	AGACATATATGTGTGCCTAGATTCATTAACATCTATATGAATGTG	5040.88	0/0	0/0	./.	0/0	0/0	./.	0/0	./.	0/0	./.	0/0	1|1	./.	1|1	0/0	0/0	0/0	0/0	0/0	1|1	0/0	0/0	0/0	0/0	AGACATATATGTGTGCCTAGATTCATTAACATCTATATGAATGTG|upstream_gene_variant|MODIFIER|EPlOSAG00000039838|EPlOSAG00000039838|transcript|EPlOSAT00000041226|lincRNA||n.-3746_-3745insCACATTCATATAGATGTTAATGAATCTAGGCACACATATATGTC|||||3746|,AGACATATATGTGTGCCTAGATTCATTAACATCTATATGAATGTG|downstream_gene_variant|MODIFIER|EPlOSAG00000041304|EPlOSAG00000041304|transcript|EPlOSAT00000042692|lincRNA||n.*3745_*3746insGA…
chr01	2713018	GTTATAGATGGCTTATAGCATGCTATTGTACCTGCTCTAATGTGCA	G	14274.6	0/0	0/0	1|1	0/0	0/0	1|1	1|1	1|1	0/0	1|1	0/0	1|1	1|1	1|1	0/0	0/0	0/0	0/0	0/0	1|1	0/0	0/0	0/0	0/0	G|upstream_gene_variant|MODIFIER|OS01G0150000|OS01G0150000|transcript|OS01T0150000-02|protein_coding||c.-1727_-1683delTGCACATTAGAGCAGGTACAATAGCATGCTATAAGCCATCTATAA|||||1619|,G|upstream_gene_variant|MODIFIER|OS01G0150100|OS01G0150100|transcript|OS01T0150100-01|protein_coding||c.-393_-349delTTATAGATGGCTTATAGCATGCTATTGTACCTGCTCTAATGTGCA|||||281|,G|upstream_gene_variant|MODIFIER|PAS2B|OS01G0150200|tr…
chr01	2749262	T	TTACACTACCAGAATCTGGAGG	16771.6	0/0	0/0	1|1	0/0	0/0	1|1	1|1	1|1	0/0	1|1	0/0	1|1	1|1	1|1	0/0	0/0	0/0	0/0	0/0	1|1	0/0	0/0	0/0	0/0	TTACACTACCAGAATCTGGAGG|upstream_gene_variant|MODIFIER|EPlOSAG00000027540|EPlOSAG00000027540|transcript|EPlOSAT00000028928|lincRNA||n.-1449_-1448insCCTCCAGATTCTGGTAGTGTA|||||1449|,TTACACTACCAGAATCTGGAGG|upstream_gene_variant|MODIFIER|EPlOSAG00000049116|EPlOSAG00000049116|transcript|EPlOSAT00000050504|lincRNA||n.-2684_-2683insTACACTACCAGAATCTGGAGG|||||2683|,TTACACTACCAGAATCTGGAGG|upstream_gene_vari…
chr01	2763186	C	CTGAAATTTTTGCCGACCGACCGAATTGTATTTAGAAGAAAGAGCAAGAGTCCAAGTTTCAAA	12887.1	0/0	0/0	1/1	0/0	0/0	1/1	1/1	1/1	0/0	1/1	0/0	1/1	1/1	1/1	0/0	0/0	0/0	0/0	0/0	0/0	0/0	0/0	0/0	0/0	CTGAAATTTTTGCCGACCGACCGAATTGTATTTAGAAGAAAGAGCAAGAGTCCAAGTTTCAAA|upstream_gene_variant|MODIFIER|OS01G0151100|OS01G0151100|transcript|OS01T0151100-01|protein_coding||c.-3331_-3330insTGAAATTTTTGCCGACCGACCGAATTGTATTTAGAAGAAAGAGCAAGAGTCCAAGTTTCAAA|||||2592|,CTGAAATTTTTGCCGACCGACCGAATTGTATTTAGAAGAAAGAGCAAGAGTCCAAGTTTCAAA|downstream_gene_variant|MODIFIER|OS01G0150900|OS01G0150900|transcript|OS01T0150900…
chr01	2764549	T	TCTCCCCCCCTCCCCCCCGGCAAAAAAAAAACCCTCCTCGCTTTGAACTAATGTCTATCAAATGAGAAACTTA	17859.6	0/0	0/0	1/1	0/0	0/0	1/1	1/1	1/1	0/0	1/1	0/0	1/1	1/1	1/1	0/0	0/0	0/0	0/0	0/0	1/1	0/0	0/0	0/0	0/0	TCTCCCCCCCTCCCCCCCGGCAAAAAAAAAACCCTCCTCGCTTTGAACTAATGTCTATCAAATGAGAAACTTA|upstream_gene_variant|MODIFIER|OS01G0151100|OS01G0151100|transcript|OS01T0151100-01|protein_coding||c.-1968_-1967insCTCCCCCCCTCCCCCCCGGCAAAAAAAAAACCCTCCTCGCTTTGAACTAATGTCTATCAAATGAGAAACTTA|||||1229|,TCTCCCCCCCTCCCCCCCGGCAAAAAAAAAACCCTCCTCGCTTTGAACTAATGTCTATCAAATGAGAAACTTA|downstream_gene_variant|MODIFIER|OS01G0150900|OS01G0…
chr01	2769475	CTTTGAAATACATTTTTTTTTTCAAATGGTTTCTGCATAGATCAGTGTAATTCCTGT	C	9490.58	0/0	0/0	1/1	0/0	0/0	1/1	1/1	1/1	0/0	1/1	0/0	1/1	1/1	1/1	0/0	0/0	0/0	0/0	0/0	1/1	0/0	0/0	0/0	0/0	C|upstream_gene_variant|MODIFIER|OS01G0151200|OS01G0151200|transcript|OS01T0151200-01|protein_coding||c.-819_-764delTTTGAAATACATTTTTTTTTTCAAATGGTTTCTGCATAGATCAGTGTAATTCCTGT|||||666|,C|upstream_gene_variant|MODIFIER|EPlOSAG00000020967|EPlOSAG00000020967|transcript|EPlOSAT00000022355|lincRNA||n.-3778_-3723delTTTGAAATACATTTTTTTTTTCAAATGGTTTCTGCATAGATCAGTGTAATTCCTGT|||||3778|,C|upstream_gene_variant|…
chr01	2778111	A	AACCATATTAAACAAAAACACACATTGTAGGTCACGGCAG	17292.6	0/0	0/0	1|1	0/0	0/0	1/1	1|1	1/1	0/0	1|1	0/0	1/1	1|1	1/1	0/0	0/0	0/0	0/0	0/0	1/1	0/0	0/0	0/0	0/0	AACCATATTAAACAAAAACACACATTGTAGGTCACGGCAG|downstream_gene_variant|MODIFIER|OS01G0151200|OS01G0151200|transcript|OS01T0151200-01|protein_coding||c.*4572_*4573insACCATATTAAACAAAAACACACATTGTAGGTCACGGCAG|||||3951|,AACCATATTAAACAAAAACACACATTGTAGGTCACGGCAG|downstream_gene_variant|MODIFIER|EPlOSAG00000020967|EPlOSAG00000020967|transcript|EPlOSAT00000022355|lincRNA||n.*4799_*4800insACCATATTAAACAAAAACACACA…
chr01	2780690	G	GTCCGGTCGGTGGCATATAAAATGCAGCTGGTGCCAAATGAGGTGGTGTACGA,GTCCGGTCGGTGGCATATAAAATGCAGCTGGTGCCAAATGAGGT,GTCC,GTCCGGTCGGTGGCATATAAAATGCAGCTGGTGCCAAATGAGGTGGTGTAC	6602.07	0/0	0/0	./.	0/0	0/0	2|2	4|4	./.	0/0	3|3	0/0	./.	./.	1|1	0/0	0/0	0/0	0/0	0/0	./.	0/0	0/0	0/0	0/0	GTCC|upstream_gene_variant|MODIFIER|OS01G0151500|OS01G0151500|transcript|OS01T0151500-00|protein_coding||c.-2499_-2498insTCC|||||2498|,GTCCGGTCGGTGGCATATAAAATGCAGCTGGTGCCAAATGAGGT|upstream_gene_variant|MODIFIER|OS01G0151500|OS01G0151500|transcript|OS01T0151500-00|protein_coding||c.-2499_-2498insTCCGGTCGGTGGCATATAAAATGCAGCTGGTGCCAAATGAGGT|||||2498|,GTCCGGTCGGTGGCATATAAAATGCAGCTGGTGCCAAATGAGGTGGTGT…
chr01	2780694	A	AAATGCAGCTGGTGCCAAATGAGGTGGTGTACGAGAACGAG	1822.48	0/0	0/0	./.	0/0	0/0	./.	./.	./.	0/0	1|1	0/0	./.	./.	./.	0/0	0/0	0/0	0/0	0/0	./.	0/0	0/0	0/0	0/0	AAATGCAGCTGGTGCCAAATGAGGTGGTGTACGAGAACGAG|upstream_gene_variant|MODIFIER|OS01G0151500|OS01G0151500|transcript|OS01T0151500-00|protein_coding||c.-2495_-2494insAATGCAGCTGGTGCCAAATGAGGTGGTGTACGAGAACGAG|||||2494|,AAATGCAGCTGGTGCCAAATGAGGTGGTGTACGAGAACGAG|upstream_gene_variant|MODIFIER|EPlOSAG00000025406|EPlOSAG00000025406|transcript|EPlOSAT00000026794|lincRNA||n.-4723_-4722insAATGCAGCTGGTGCCAAATGAGGT…
chr01	2783016	TAGGATCTGTAGAATCATTGCCCAGTTAGACAC	T	4706.17	0/0	0/0	1/1	0/0	0/0	1/1	1/1	1/1	0/0	1/1	0/0	1/1	1/1	1/1	0/0	0/0	0/0	0/0	0/0	./.	0/0	0/0	0/0	0/0	T|upstream_gene_variant|MODIFIER|EPlOSAG00000008792|EPlOSAG00000008792|transcript|EPlOSAT00000010180|lincRNA||n.-115_-84delGTGTCTAACTGGGCAATGATTCTACAGATCCT|||||84|,T|upstream_gene_variant|MODIFIER|OS01G0151500|OS01G0151500|transcript|OS01T0151500-00|protein_coding||c.-172_-141delAGGATCTGTAGAATCATTGCCCAGTTAGACAC|||||172|,T|upstream_gene_variant|MODIFIER|EPlOSAG00000025406|EPlOSAG00000025406|transc…
chr01	2783824	A	AATATATATATATATATATATATATATAT	417.08	./.	0/0	./.	0/0	./.	./.	./.	./.	0/0	./.	0/0	./.	./.	./.	0/0	./.	1/1	0/0	./.	./.	./.	0/0	0/0	0/0	AATATATATATATATATATATATATATAT|upstream_gene_variant|MODIFIER|EPlOSAG00000008792|EPlOSAG00000008792|transcript|EPlOSAT00000010180|lincRNA||n.-892_-891insATATATATATATATATATATATATATAT|||||892|,AATATATATATATATATATATATATATAT|upstream_gene_variant|MODIFIER|EPlOSAG00000025406|EPlOSAG00000025406|transcript|EPlOSAT00000026794|lincRNA||n.-1593_-1592insATATATATATATATATATATATATATAT|||||1592|,AATATATATATATATA…
chr01	2797594	T	TTGCTCCAACCACATTCTTGAATTGCTCCAACCACATTCTTGAACAGTCCCAAA	11286.6	0/0	0/0	./.	0/0	0/0	./.	1|1	1|1	0/0	1|1	0/0	./.	1|1	1|1	0/0	0/0	0/0	0/0	0/0	./.	0/0	0/0	0/0	0/0	TTGCTCCAACCACATTCTTGAATTGCTCCAACCACATTCTTGAACAGTCCCAAA|upstream_gene_variant|MODIFIER|OS01G0151700|OS01G0151700|transcript|OS01T0151700-01|protein_coding||c.-3154_-3153insTGCTCCAACCACATTCTTGAATTGCTCCAACCACATTCTTGAACAGTCCCAAA|||||2921|,TTGCTCCAACCACATTCTTGAATTGCTCCAACCACATTCTTGAACAGTCCCAAA|downstream_gene_variant|MODIFIER|OS01G0151600|OS01G0151600|transcript|OS01T0151600-01|protein_coding||c.*2248…
chr01	2805027	CACCTGCTCTTAAAACTGAATTATATAGATGTAATTTTAAAAAGTGTAATTTATTTCAATGCAAGATT	C	6769.26	0/0	0/0	1/1	0/0	0/0	1/1	1/1	1/1	0/0	1/1	0/0	1/1	1/1	1/1	0/0	0/0	0/0	0/0	0/0	1/1	0/0	0/0	0/0	0/0	C|upstream_gene_variant|MODIFIER|EPlOSAG00000020357|EPlOSAG00000020357|transcript|EPlOSAT00000021745|lincRNA||n.-3327_-3261delAATCTTGCATTGAAATAAATTACACTTTTTAAAATTACATCTATATAATTCAGTTTTAAGAGCAGGT|||||3261|,C|upstream_gene_variant|MODIFIER|OS01G0151750|OS01G0151750|transcript|OS01T0151750-00|protein_coding||c.-3072_-3006delAATCTTGCATTGAAATAAATTACACTTTTTAAAATTACATCTATATAATTCAGTTTTAAGAGCAGGT|||||2903|…
chr01	2809970	G	GCTATACGAACAACTGGTTGTGTCCGACTCACATCCGACCACCGATCAACGCTCTCAGCATCTTCCCATGTGGGTCTAGGCATATAGCAGCTTTGAACTAGTCGGATACAAATCGCACATGTTGGTCGTATGTATAGACATTTCCGGCTGGGTTC	3300.18	0/0	0/0	1|1	0/0	0/0	1|1	./.	./.	0/0	./.	0/0	1|1	./.	1|1	0/0	0/0	0/0	0/0	0/0	1|1	0/0	0/0	0/0	0/0	GCTATACGAACAACTGGTTGTGTCCGACTCACATCCGACCACCGATCAACGCTCTCAGCATCTTCCCATGTGGGTCTAGGCATATAGCAGCTTTGAACTAGTCGGATACAAATCGCACATGTTGGTCGTATGTATAGACATTTCCGGCTGGGTTC|upstream_gene_variant|MODIFIER|EPlOSAG00000016650|EPlOSAG00000016650|transcript|EPlOSAT00000018038|lincRNA||n.-2507_-2506insGAACCCAGCCGGAAATGTCTATACATACGACCAACATGTGCGATTTGTATCCGACTAGTTCAAAGCTGCTATATGCCTAGACCCACATGGGAAGATGCTGAGAGCGTTGATCGGTGGTC…
chr01	2810514	C	CACTCTGCGCCCGTTACCTGTTCGACAGAACTCCTCCGAGG	15573	0/0	0/0	1|1	0/0	0/0	0/0	1|1	1|1	0/0	1|1	0/0	1|1	0/0	1|1	0/0	0/0	0/0	0/0	0/0	0/0	0/0	0/0	0/0	0/0	CACTCTGCGCCCGTTACCTGTTCGACAGAACTCCTCCGAGG|5_prime_UTR_variant|MODIFIER|OS01G0152000|OS01G0152000|transcript|OS01T0152000-01|protein_coding|1/3|c.-705_-704insCTCTGCGCCCGTTACCTGTTCGACAGAACTCCTCCGAGGA|||||824|INFO_REALIGN_3_PRIME,CACTCTGCGCCCGTTACCTGTTCGACAGAACTCCTCCGAGG|upstream_gene_variant|MODIFIER|EPlOSAG00000016650|EPlOSAG00000016650|transcript|EPlOSAT00000018038|lincRNA||n.-3051_-3050insCCTCGG…
chr01	2811146	T	TTGCATTAATCCATAACCCCTAGGCTATTTTG	30.95	0/0	0/0	./.	0/0	0/0	./.	1/1	./.	0/0	./.	0/0	./.	./.	./.	0/0	0/0	0/0	0/0	0/0	./.	0/0	0/0	0/0	0/0	TTGCATTAATCCATAACCCCTAGGCTATTTTG|5_prime_UTR_variant|MODIFIER|OS01G0152000|OS01G0152000|transcript|OS01T0152000-01|protein_coding|2/3|c.-194_-193insTGCATTAATCCATAACCCCTAGGCTATTTTG|||||193|,TTGCATTAATCCATAACCCCTAGGCTATTTTG|upstream_gene_variant|MODIFIER|EPlOSAG00000016650|EPlOSAG00000016650|transcript|EPlOSAT00000018038|lincRNA||n.-3683_-3682insCAAAATAGCCTAGGGGTTATGGATTAATGCA|||||3683|,TTGCATTAATC…
chr01	2816693	A	ATATTAATAAAGTAGAAAAAAAATTATAAAATTATAACCTAGG	461.44	0/0	0/0	./.	0/0	0/0	./.	1/1	./.	0/0	./.	0/0	./.	./.	./.	0/0	0/0	0/0	0/0	0/0	./.	0/0	0/0	0/0	0/0	ATATTAATAAAGTAGAAAAAAAATTATAAAATTATAACCTAGG|upstream_gene_variant|MODIFIER|OS01G0152100|OS01G0152100|transcript|OS01T0152100-00|protein_coding||c.-140_-139insCCTAGGTTATAATTTTATAATTTTTTTTCTACTTTATTAATA|||||140|,ATATTAATAAAGTAGAAAAAAAATTATAAAATTATAACCTAGG|downstream_gene_variant|MODIFIER|OS01G0152000|OS01G0152000|transcript|OS01T0152000-01|protein_coding||c.*2056_*2057insTATTAATAAAGTAGAAAAAAAATTATA…
chr01	2855987	G	GTGTTATTGCAAGAGATGTATACAGAATATAATAGAGTTGACTAATAATATTTAAGTACTGGAGTTTATAGCTTGTTGCA	16809.6	0/0	0/0	1|1	0/0	0/0	1|1	1|1	1|1	0/0	1|1	0/0	1|1	1|1	1|1	0/0	0/0	0/0	0/0	0/0	1|1	0/0	0/0	0/0	0/0	GTGTTATTGCAAGAGATGTATACAGAATATAATAGAGTTGACTAATAATATTTAAGTACTGGAGTTTATAGCTTGTTGCA|upstream_gene_variant|MODIFIER|OS01G0153050|OS01G0153050|transcript|OS01T0153050-00|protein_coding||c.-3079_-3078insTGCAACAAGCTATAAACTCCAGTACTTAAATATTATTAGTCAACTCTATTATATTCTGTATACATCTCTTGCAATAACA|||||774|,GTGTTATTGCAAGAGATGTATACAGAATATAATAGAGTTGACTAATAATATTTAAGTACTGGAGTTTATAGCTTGTTGCA|upstream_gene_variant|MODIFIER|O…
chr01	2905191	AGGGAATTGGAAAAGACTATAGAAGGAGGATTTG	A	17100	0/0	0/0	1/1	0/0	0/0	1/1	1/1	1/1	0/0	1/1	0/0	1/1	1/1	1/1	0/0	0/0	0/0	0/0	0/0	1/1	0/0	0/0	0/0	0/0	A|upstream_gene_variant|MODIFIER|OS01G0153950|OS01G0153950|transcript|OS01T0153950-00|protein_coding||c.-3159_-3127delCAAATCCTCCTTCTATAGTCTTTTCCAATTCCC|||||3000|,A|upstream_gene_variant|MODIFIER|OS01G0154000|OS01G0154000|transcript|OS01T0154000-01|protein_coding||c.-1338_-1306delCAAATCCTCCTTCTATAGTCTTTTCCAATTCCC|||||1222|,A|downstream_gene_variant|MODIFIER|OS01G0154100|OS01G0154100|transcript|OS0…
chr01	2950336	CAGCTTCCCTGATATTCTTGAAGTAAGTATCCGG	C	19304.6	0/0	0/0	1/1	0/0	0/0	1/1	1/1	1/1	0/0	1/1	0/0	1/1	1/1	1/1	0/0	0/0	0/0	0/0	0/0	1/1	0/0	0/0	0/0	0/0	C|upstream_gene_variant|MODIFIER|EPlOSAG00000016157|EPlOSAG00000016157|transcript|EPlOSAT00000017545|lincRNA||n.-810_-778delAGCTTCCCTGATATTCTTGAAGTAAGTATCCGG|||||810|,C|upstream_gene_variant|MODIFIER|OS01G0154950|OS01G0154950|transcript|OS01T0154950-01|protein_coding||c.-4174_-4142delAGCTTCCCTGATATTCTTGAAGTAAGTATCCGG|||||4173|WARNING_TRANSCRIPT_NO_START_CODON,C|intergenic_region|MODIFIER|EPlOSAG0…
chr01	2959021	A	ATTCTTACGTGCATTTCTGCCACAATTCAAAATTATGCTG	29785.6	0/0	0/0	1|1	0/0	0/0	1|1	1|1	1|1	0/0	1|1	0/0	1|1	1|1	1/1	0/0	0/0	0/0	0/0	0/0	1|1	0/0	0/0	0/0	0/0	ATTCTTACGTGCATTTCTGCCACAATTCAAAATTATGCTG|upstream_gene_variant|MODIFIER|EPlOSAG00000030240|EPlOSAG00000030240|transcript|EPlOSAT00000031628|lincRNA||n.-3219_-3218insCAGCATAATTTTGAATTGTGGCAGAAATGCACGTAAGAA|||||3219|,ATTCTTACGTGCATTTCTGCCACAATTCAAAATTATGCTG|upstream_gene_variant|MODIFIER|OS01G0155000|OS01G0155000|transcript|OS01T0155000-02|protein_coding||c.-613_-612insCAGCATAATTTTGAATTGTGGCAGAAATG…
chr01	2998587	A	ATTTTCAAATCTTGATTGAAAGT	17857.6	0/0	0/0	1|1	0/0	0/0	1|1	1|1	1|1	0/0	1|1	0/0	1|1	1|1	1|1	0/0	0/0	0/0	0/0	0/0	1|1	0/0	0/0	0/0	0/0	ATTTTCAAATCTTGATTGAAAGT|upstream_gene_variant|MODIFIER|OS01G0155800|OS01G0155800|transcript|OS01T0155800-01|protein_coding||c.-1635_-1634insTTTTCAAATCTTGATTGAAAGT|||||988|,ATTTTCAAATCTTGATTGAAAGT|intergenic_region|MODIFIER|EPlOSAG00000025250-OS01G0155800|EPlOSAG00000025250-OS01G0155800|intergenic_region|EPlOSAG00000025250-OS01G0155800|||n.2998587_2998588insTTTTCAAATCTTGATTGAAAGT||||||
chr01	3003455	A	AAAGTTTCTCGTACTTGCAAGGCTTTGAGCATGAGCGATGTGATTATGATCGGTGTTCACCTTAATACAGCGCGTTCTTTCGCT	26437.6	0/0	0/0	1|1	0/0	0/0	1|1	1|1	1|1	0/0	1|1	0/0	1|1	1|1	1|1	0/0	0/0	0/0	0/0	0/0	1|1	0/0	0/0	0/0	0/0	AAAGTTTCTCGTACTTGCAAGGCTTTGAGCATGAGCGATGTGATTATGATCGGTGTTCACCTTAATACAGCGCGTTCTTTCGCT|downstream_gene_variant|MODIFIER|OS01G0155800|OS01G0155800|transcript|OS01T0155800-01|protein_coding||c.*2521_*2522insAAGTTTCTCGTACTTGCAAGGCTTTGAGCATGAGCGATGTGATTATGATCGGTGTTCACCTTAATACAGCGCGTTCTTTCGCT|||||2317|,AAAGTTTCTCGTACTTGCAAGGCTTTGAGCATGAGCGATGTGATTATGATCGGTGTTCACCTTAATACAGCGCGTTCTTTCGCT|downstream_gene_v…
chr01	3033437	TTATCCCGAGCGCATTACACATATATGCAA	T	27568.6	0/0	0/0	1/1	0/0	0/0	1/1	1/1	1/1	0/0	1/1	0/0	1/1	1/1	1/1	0/0	0/0	0/0	0/0	0/0	1/1	0/0	0/0	0/0	0/0	T|upstream_gene_variant|MODIFIER|OS01G0157400|OS01G0157400|transcript|OS01T0157400-00|protein_coding||c.-1621_-1593delTATCCCGAGCGCATTACACATATATGCAA|||||1621|,T|upstream_gene_variant|MODIFIER|OS01G0157600|OS01G0157600|transcript|OS01T0157600-01|protein_coding||c.-4251_-4223delTATCCCGAGCGCATTACACATATATGCAA|||||4251|WARNING_TRANSCRIPT_NO_START_CODON,T|downstream_gene_variant|MODIFIER|OS01G0157200|OS…
chr01	3053876	T	TAAGTTTAGTGACCTAGAAATGTATTTTGA	27557.6	0/0	0/0	1|1	0/0	0/0	1|1	1|1	1|1	0/0	1|1	0/0	1|1	1|1	1|1	0/0	0/0	0/0	0/0	0/0	1|1	0/0	0/0	0/0	0/0	TAAGTTTAGTGACCTAGAAATGTATTTTGA|upstream_gene_variant|MODIFIER|OS01G0158100|OS01G0158100|transcript|OS01T0158100-01|protein_coding||c.-757_-756insTCAAAATACATTTCTAGGTCACTAAACTT|||||726|,TAAGTTTAGTGACCTAGAAATGTATTTTGA|upstream_gene_variant|MODIFIER|OS01G0158200|OS01G0158200|transcript|OS01T0158200-01|protein_coding||c.-682_-681insAAGTTTAGTGACCTAGAAATGTATTTTGA|||||604|,TAAGTTTAGTGACCTAGAAATGTATTTTGA|…
chr01	3057392	GGAGTATACGGCCGAGAACTTGACGAACGA	G	17568.6	0/0	0/0	1/1	0/0	0/0	1/1	1/1	1/1	0/0	1/1	0/0	1/1	1/1	1/1	0/0	0/0	0/0	0/0	0/0	1/1	0/0	0/0	0/0	0/0	G|upstream_gene_variant|MODIFIER|OS01G0158100|OS01G0158100|transcript|OS01T0158100-01|protein_coding||c.-4301_-4273delTCGTTCGTCAAGTTCTCGGCCGTATACTC|||||4242|,G|upstream_gene_variant|MODIFIER|EPlOSAG00000047026|EPlOSAG00000047026|transcript|EPlOSAT00000048414|lincRNA||n.-3103_-3075delGAGTATACGGCCGAGAACTTGACGAACGA|||||3103|,G|upstream_gene_variant|MODIFIER|OS01G0158500|OS01G0158500|transcript|OS01T…
chr01	3057887	T	TATTTTAGGTGGTCCATGTATTTGCATTTTCTATGGACTACTGTAACATCCCA	22475.6	0/0	0/0	1|1	0/0	0/0	1|1	1|1	1|1	0/0	1|1	0/0	1|1	1|1	1|1	0/0	0/0	0/0	0/0	0/0	1|1	0/0	0/0	0/0	0/0	TATTTTAGGTGGTCCATGTATTTGCATTTTCTATGGACTACTGTAACATCCCA|upstream_gene_variant|MODIFIER|OS01G0158100|OS01G0158100|transcript|OS01T0158100-01|protein_coding||c.-4768_-4767insTGGGATGTTACAGTAGTCCATAGAAAATGCAAATACATGGACCACCTAAAAT|||||4737|,TATTTTAGGTGGTCCATGTATTTGCATTTTCTATGGACTACTGTAACATCCCA|upstream_gene_variant|MODIFIER|EPlOSAG00000047026|EPlOSAG00000047026|transcript|EPlOSAT00000048414|lincRNA||n.-2…
chr01	3064064	A	ATAGCTTTAACACTTCTTGTC	28806.6	0/0	0/0	1/1	0/0	0/0	1/1	1/1	1/1	0/0	1/1	0/0	1/1	1/1	1/1	0/0	0/0	0/0	0/0	0/0	1/1	0/0	0/0	0/0	0/0	ATAGCTTTAACACTTCTTGTC|upstream_gene_variant|MODIFIER|OS01G0158400|OS01G0158400|transcript|OS01T0158400-01|protein_coding||c.-4464_-4463insGACAAGAAGTGTTAAAGCTA|||||4348|,ATAGCTTTAACACTTCTTGTC|upstream_gene_variant|MODIFIER|EPlOSAG00000047034|EPlOSAG00000047034|transcript|EPlOSAT00000048422|lincRNA||n.-3510_-3509insGACAAGAAGTGTTAAAGCTA|||||3510|,ATAGCTTTAACACTTCTTGTC|upstream_gene_variant|MODIFIER|…
chr01	3066838	GAAACTGAGTCAGTTGAATTGTCCTCCTCAATCGTA	G	13813.6	0/0	0/0	1|1	0/0	0/0	1|1	1|1	1|1	0/0	1|1	0/0	1|1	1|1	1|1	0/0	0/0	0/0	0/0	0/0	1|1	0/0	0/0	0/0	0/0	G|upstream_gene_variant|MODIFIER|OS01G0158533|OS01G0158533|transcript|OS01T0158533-00|protein_coding||c.-2521_-2487delTACGATTGAGGAGGACAATTCAACTGACTCAGTTT|||||915|,G|upstream_gene_variant|MODIFIER|OS01G0158566|OS01G0158566|transcript|OS01T0158566-00|protein_coding||c.-494_-460delAAACTGAGTCAGTTGAATTGTCCTCCTCAATCGTA|||||493|WARNING_TRANSCRIPT_NO_START_CODON,G|downstream_gene_variant|MODIFIER|OS01G01…
chr01	3078496	C	CCAGGAGATCTAAGGGTCAAT	2182.97	0/0	0/0	1|1	0/0	0/0	1|1	1|1	1|1	0/0	1|1	0/0	1|1	1|1	1|1	0/0	0/0	0/0	0/0	0/0	1|1	0/0	0/0	0/0	0/0	CCAGGAGATCTAAGGGTCAAT|upstream_gene_variant|MODIFIER|EPlOSAG00000026771|EPlOSAG00000026771|transcript|EPlOSAT00000028159|lincRNA||n.-2196_-2195insATTGACCCTTAGATCTCCTG|||||2196|,CCAGGAGATCTAAGGGTCAAT|upstream_gene_variant|MODIFIER|EPlOSAG00000041983|EPlOSAG00000041983|transcript|EPlOSAT00000043371|lincRNA||n.-852_-851insATTGACCCTTAGATCTCCTG|||||852|,CCAGGAGATCTAAGGGTCAAT|downstream_gene_variant|MO…
chr01	3079717	T	TGAAAACAATAAGTATCGTCGTTCA	15756.6	0/0	0/0	1/1	0/0	0/0	1/1	1/1	1/1	0/0	1/1	0/0	1/1	1/1	1/1	0/0	0/0	0/0	0/0	0/0	1/1	0/0	0/0	0/0	0/0	TGAAAACAATAAGTATCGTCGTTCA|upstream_gene_variant|MODIFIER|EPlOSAG00000026771|EPlOSAG00000026771|transcript|EPlOSAT00000028159|lincRNA||n.-3417_-3416insTGAACGACGATACTTATTGTTTTC|||||3417|,TGAAAACAATAAGTATCGTCGTTCA|upstream_gene_variant|MODIFIER|EPlOSAG00000041983|EPlOSAG00000041983|transcript|EPlOSAT00000043371|lincRNA||n.-2073_-2072insTGAACGACGATACTTATTGTTTTC|||||2073|,TGAAAACAATAAGTATCGTCGTTCA|dow…
chr01	3085513	C	CTAAACACACCCTTAATTCACTCGAACACAGTATGCA	16116.6	0/0	0/0	1/1	0/0	0/0	1/1	1/1	1/1	0/0	1/1	0/0	1/1	1/1	1/1	0/0	0/0	0/0	0/0	0/0	1/1	0/0	0/0	0/0	0/0	CTAAACACACCCTTAATTCACTCGAACACAGTATGCA|3_prime_UTR_variant|MODIFIER|OS01G0158900|OS01G0158900|transcript|OS01T0158900-01|protein_coding|13/13|c.*272_*307dupTGCATACTGTGTTCGAGTGAATTAAGGGTGTGTTTA|||||307|,CTAAACACACCCTTAATTCACTCGAACACAGTATGCA|upstream_gene_variant|MODIFIER|OS01G0158800|OS01G0158800|transcript|OS01T0158800-00|protein_coding||c.-853_-818dupTGCATACTGTGTTCGAGTGAATTAAGGGTGTGTTTA|||||818|,…
chr01	3095352	GCGCAAGTAGGTCACGCCCACTGTGGGCTTCGTTTCCTTCAC	G	19868.6	0/0	0/0	1|1	0/0	0/0	1|1	1|1	1|1	0/0	1|1	0/0	1|1	1|1	1|1	0/0	0/0	0/0	0/0	0/0	1|1	0/0	0/0	0/0	0/0	G|upstream_gene_variant|MODIFIER|OS01G0158900|OS01G0158900|transcript|OS01T0158900-01|protein_coding||c.-4586_-4546delGTGAAGGAAACGAAGCCCACAGTGGGCGTGACCTACTTGCG|||||4466|,G|upstream_gene_variant|MODIFIER|OS01G0159000|OS01G0159000|transcript|OS01T0159000-01|protein_coding||c.-2763_-2723delGTGAAGGAAACGAAGCCCACAGTGGGCGTGACCTACTTGCG|||||2655|,G|upstream_gene_variant|MODIFIER|OS01G0159250|OS01G0159250|…
chr01	3105631	G	GGTATTGTAGTATATTTTTTTTTTTGATGC	20262.6	0/0	0/0	1/1	0/0	0/0	1/1	1/1	1/1	0/0	1/1	0/0	1/1	1/1	1/1	0/0	0/0	0/0	0/0	0/0	1/1	0/0	0/0	0/0	0/0	GGTATTGTAGTATATTTTTTTTTTTGATGC|upstream_gene_variant|MODIFIER|OS01G0159300|OS01G0159300|transcript|OS01T0159300-01|protein_coding||c.-2865_-2864insGCATCAAAAAAAAAAATATACTACAATAC|||||406|,GGTATTGTAGTATATTTTTTTTTTTGATGC|upstream_gene_variant|MODIFIER|EPlOSAG00000037083|EPlOSAG00000037083|transcript|EPlOSAT00000038471|lincRNA||n.-531_-530insGTATTGTAGTATATTTTTTTTTTTGATGC|||||530|,GGTATTGTAGTATATTTTTTT…
chr01	3124510	TCGTACATCGATCACAATATA	T	18500	0/0	0/0	0/0	0/0	0/0	1/1	1/1	0/0	0/0	1/1	0/0	1/1	0/0	1/1	0/0	0/0	0/0	0/0	0/0	1/1	0/0	0/0	0/0	0/0	T|3_prime_UTR_variant|MODIFIER|OS01G0159600|OS01G0159600|transcript|OS01T0159600-01|protein_coding|2/2|c.*277_*296delTATATTGTGATCGATGTACG|||||277|,T|upstream_gene_variant|MODIFIER|OS01G0159800|OS01G0159800|transcript|OS01T0159800-01|protein_coding||c.-4775_-4756delCGTACATCGATCACAATATA|||||4545|,T|downstream_gene_variant|MODIFIER|EPlOSAG00000004042|EPlOSAG00000004042|transcript|EPlOSAT00000005430|…
chr01	3138414	ATTTGGATTCTAAAGCAGAAG	A	20479.6	0/0	0/0	1|1	0/0	0/0	1|1	1|1	1|1	0/0	1|1	0/0	1|1	1|1	1|1	0/0	0/0	0/0	0/0	0/0	1|1	0/0	0/0	0/0	0/0	A|intron_variant|MODIFIER|OS01G0160100|OS01G0160100|transcript|OS01T0160100-01|protein_coding|1/5|c.502-125_502-106delCTTCTGCTTTAGAATCCAAA||||||,A|intron_variant|MODIFIER|OS01G0160150|OS01G0160150|transcript|OS01T0160150-00|protein_coding|5/5|c.-158+104_-158+123delTTTGGATTCTAAAGCAGAAG||||||WARNING_TRANSCRIPT_INCOMPLETE
chr01	3138564	T	TCACCAATCAAAACAAATAATCG,TCACC,TCACCAATCAAAAC	2944.05	0/0	0/0	1/1	0/0	0/0	3/3	2|2	2|2	0/0	./.	0/0	./.	2|2	2|2	0/0	0/0	0/0	0/0	0/0	./.	0/0	0/0	0/0	0/0	TCACC|intron_variant|MODIFIER|OS01G0160100|OS01G0160100|transcript|OS01T0160100-01|protein_coding|1/5|c.502-256_502-255insGGTG||||||,TCACCAATCAAAAC|intron_variant|MODIFIER|OS01G0160100|OS01G0160100|transcript|OS01T0160100-01|protein_coding|1/5|c.502-256_502-255insGTTTTGATTGGTG||||||,TCACCAATCAAAACAAATAATCG|intron_variant|MODIFIER|OS01G0160100|OS01G0160100|transcript|OS01T0160100-01|protein_coding…
chr01	3138904	A	AAAAAAAAGAAGTGTACTACTCTAAGAAGGCCTG,AAAAAAAAGAAG,AAAAAAAAGAAGTGTACTAC	2053.99	0/0	0/0	./.	0/0	0/0	./.	./.	1/1	0/0	1/1	0/0	.	3/3	./.	0/0	0/0	0/0	0/0	0/0	2|2	0/0	0/0	0/0	0/0	AAAAAAAAGAAG|downstream_gene_variant|MODIFIER|OS01G0160200|OS01G0160200|transcript|OS01T0160200-02|protein_coding||c.*4754_*4755insCTTCTTTTTTT|||||4696|,AAAAAAAAGAAGTGTACTAC|downstream_gene_variant|MODIFIER|OS01G0160200|OS01G0160200|transcript|OS01T0160200-02|protein_coding||c.*4754_*4755insGTAGTACACTTCTTTTTTT|||||4696|,AAAAAAAAGAAGTGTACTACTCTAAGAAGGCCTG|downstream_gene_variant|MODIFIER|OS01G0160…
chr01	3140465	G	GTTTCTTATTGCAAAATTCAAAA	278.51	0/0	0/0	./.	0/0	0/0	1/1	0/0	./.	0/0	./.	0/0	./.	./.	./.	0/0	0/0	0/0	0/0	0/0	./.	0/0	0/0	0/0	0/0	GTTTCTTATTGCAAAATTCAAAA|upstream_gene_variant|MODIFIER|OS01G0160100|OS01G0160100|transcript|OS01T0160100-01|protein_coding||c.-368_-367insTTTTGAATTTTGCAATAAGAAA|||||249|,GTTTCTTATTGCAAAATTCAAAA|downstream_gene_variant|MODIFIER|OS01G0160150|OS01G0160150|transcript|OS01T0160150-00|protein_coding||c.*335_*336insTTTCTTATTGCAAAATTCAAAA|||||336|WARNING_TRANSCRIPT_INCOMPLETE,GTTTCTTATTGCAAAATTCAAAA|down…
chr01	3142817	CATGCTACATATATTTATAGCCAG	C	21112.6	0/0	0/0	1/1	0/0	0/0	1/1	1/1	1/1	0/0	1/1	0/0	1/1	1/1	1/1	0/0	0/0	0/0	0/0	0/0	1/1	0/0	0/0	0/0	0/0	C|upstream_gene_variant|MODIFIER|OS01G0160100|OS01G0160100|transcript|OS01T0160100-01|protein_coding||c.-2742_-2720delCTGGCTATAAATATATGTAGCAT|||||2601|,C|downstream_gene_variant|MODIFIER|OS01G0160150|OS01G0160150|transcript|OS01T0160150-00|protein_coding||c.*2688_*2710delATGCTACATATATTTATAGCCAG|||||2688|WARNING_TRANSCRIPT_INCOMPLETE,C|downstream_gene_variant|MODIFIER|OS01G0160200|OS01G0160200|tra…
chr01	3153156	TTTTTATTGGGAAAATTGGAA	T	2747.48	0/0	0/0	./.	0/0	0/0	./.	./.	1|1	0/0	1|1	0/0	1|1	./.	./.	0/0	0/0	0/0	0/0	0/0	0/0	0/0	0/0	0/0	0/0	T|intergenic_region|MODIFIER|OS01G0160200-EPlOSAG00000009517|OS01G0160200-EPlOSAG00000009517|intergenic_region|OS01G0160200-EPlOSAG00000009517|||n.3153157_3153176delTTTTATTGGGAAAATTGGAA||||||
chr01	3153181	ACCATTATAATTTTACAAAATTTAT	A	3324.48	0/0	0/0	./.	0/0	0/0	./.	./.	1|1	0/0	1|1	0/0	1|1	./.	./.	0/0	0/0	0/0	0/0	0/0	0/0	0/0	0/0	0/0	0/0	A|intergenic_region|MODIFIER|OS01G0160200-EPlOSAG00000009517|OS01G0160200-EPlOSAG00000009517|intergenic_region|OS01G0160200-EPlOSAG00000009517|||n.3153182_3153205delCCATTATAATTTTACAAAATTTAT||||||
chr01	3181026	CCCAAGTTATGGTCTCTTCTTTGATTTTTCTTTTACGGTGGACGGGGTT	C	16451.6	0/0	0/0	1/1	0/0	0/0	1/1	1/1	1/1	0/0	1/1	0/0	1/1	1/1	1/1	0/0	0/0	0/0	0/0	0/0	1/1	0/0	0/0	0/0	0/0	C|upstream_gene_variant|MODIFIER|EPlOSAG00000034814|EPlOSAG00000034814|transcript|EPlOSAT00000036202|lincRNA||n.-5025_-4978delAACCCCGTCCACCGTAAAAGAAAAATCAAAGAAGAGACCATAACTTGG|||||4978|,C|upstream_gene_variant|MODIFIER|OS01G0160700|OS01G0160700|transcript|OS01T0160700-00|protein_coding||c.-1112_-1065delCCAAGTTATGGTCTCTTCTTTGATTTTTCTTTTACGGTGGACGGGGTT|||||1112|,C|downstream_gene_variant|MODIFIER|EP…
chr01	3187457	G	GGAACCGGAGGCAAAAGGATGAGGGGAGTAA	292.17	0/0	0/0	./.	0/0	0/0	./.	1/1	./.	0/0	./.	0/0	./.	./.	./.	0/0	0/0	0/0	0/0	0/0	./.	0/0	0/0	0/0	0/0	GGAACCGGAGGCAAAAGGATGAGGGGAGTAA|upstream_gene_variant|MODIFIER|EPlOSAG00000029615|EPlOSAG00000029615|transcript|EPlOSAT00000031003|lincRNA||n.-1748_-1747insGAACCGGAGGCAAAAGGATGAGGGGAGTAA|||||1747|,GGAACCGGAGGCAAAAGGATGAGGGGAGTAA|downstream_gene_variant|MODIFIER|OS01G0160700|OS01G0160700|transcript|OS01T0160700-00|protein_coding||c.*2250_*2251insGAACCGGAGGCAAAAGGATGAGGGGAGTAA|||||2251|,GGAACCGGAGG…
chr01	3187989	CATCCAAAAATTCCGTCACATT	C	26617.6	0/0	0/0	1|1	0/0	0/0	1|1	1|1	1|1	0/0	1|1	0/0	1|1	1|1	1|1	0/0	0/0	0/0	0/0	0/0	1|1	0/0	0/0	0/0	0/0	C|upstream_gene_variant|MODIFIER|EPlOSAG00000029615|EPlOSAG00000029615|transcript|EPlOSAT00000031003|lincRNA||n.-1215_-1195delATCCAAAAATTCCGTCACATT|||||1215|,C|upstream_gene_variant|MODIFIER|EPlOSAG00000041483|EPlOSAG00000041483|transcript|EPlOSAT00000042871|lincRNA||n.-5001_-4981delATCCAAAAATTCCGTCACATT|||||5001|,C|downstream_gene_variant|MODIFIER|OS01G0160700|OS01G0160700|transcript|OS01T016070…
chr01	3188739	A	AGTGTAGGAATCTAGGATCGATGCACGCATCATATCCATACTCCCACCG	1186.63	0/0	0/0	./.	0/0	0/0	1/1	./.	./.	0/0	1/1	0/0	./.	./.	./.	0/0	0/0	0/0	0/0	0/0	./.	0/0	0/0	0/0	0/0	AGTGTAGGAATCTAGGATCGATGCACGCATCATATCCATACTCCCACCG|upstream_gene_variant|MODIFIER|EPlOSAG00000029615|EPlOSAG00000029615|transcript|EPlOSAT00000031003|lincRNA||n.-466_-465insGTGTAGGAATCTAGGATCGATGCACGCATCATATCCATACTCCCACCG|||||465|,AGTGTAGGAATCTAGGATCGATGCACGCATCATATCCATACTCCCACCG|upstream_gene_variant|MODIFIER|EPlOSAG00000041483|EPlOSAG00000041483|transcript|EPlOSAT00000042871|lincRNA||n.-4252_-42…
chr01	3196471	T	TTTGACGGGAGTTATTTGTTTGGA,TTTGAC	1406.72	0/0	0/0	./.	0/0	0/0	./.	./.	./.	0/0	./.	0/0	./.	2/2	1/1	0/0	0/0	0/0	0/0	0/0	./.	0/0	0/0	0/0	0/0	TTTGAC|upstream_gene_variant|MODIFIER|EPlOSAG00000041345|EPlOSAG00000041345|transcript|EPlOSAT00000042733|lincRNA||n.-3354_-3353insGTCAA|||||3354|,TTTGACGGGAGTTATTTGTTTGGA|upstream_gene_variant|MODIFIER|EPlOSAG00000041345|EPlOSAG00000041345|transcript|EPlOSAT00000042733|lincRNA||n.-3354_-3353insTCCAAACAAATAACTCCCGTCAA|||||3354|,TTTGAC|upstream_gene_variant|MODIFIER|EPlOSAG00000025331|EPlOSAG00000…
chr01	3205019	AGCGCCCGTTCCGTCGTGGCGCCTAGCGGG	A	1885.18	0/0	0/0	1|1	0/0	0/0	1|1	./.	1|1	0/0	./.	0/0	./.	1|1	0/0	0/0	0/0	0/0	0/0	0/0	./.	0/0	0/0	0/0	0/0	A|downstream_gene_variant|MODIFIER|EPlOSAG00000000640|EPlOSAG00000000640|transcript|EPlOSAT00000002028|lincRNA||n.*4027_*4055delGCGCCCGTTCCGTCGTGGCGCCTAGCGGG|||||4027|,A|downstream_gene_variant|MODIFIER|OS01G0161000|OS01G0161000|transcript|OS01T0161000-00|protein_coding||c.*768_*796delGCGCCCGTTCCGTCGTGGCGCCTAGCGGG|||||768|,A|intergenic_region|MODIFIER|OS01G0161000-EPlOSAG00000025362|OS01G0161000-…
chr01	3226510	C	CCGTGCCCCCCAGGAGGAGACAGGCAG	5570.31	0/0	0/0	1/1	0/0	0/0	1/1	1/1	1/1	0/0	1/1	0/0	1/1	1/1	1/1	0/0	0/0	0/0	0/0	0/0	1/1	0/0	0/0	0/0	0/0	CCGTGCCCCCCAGGAGGAGACAGGCAG|5_prime_UTR_variant|MODIFIER|OS01G0161200|OS01G0161200|transcript|OS01T0161200-01|protein_coding|1/3|c.-4_-3insCTGCCTGTCTCCTCCTGGGGGGCACG|||||4|,CCGTGCCCCCCAGGAGGAGACAGGCAG|upstream_gene_variant|MODIFIER|EPlOSAG00000015793|EPlOSAG00000015793|transcript|EPlOSAT00000017181|lincRNA||n.-4139_-4138insCGTGCCCCCCAGGAGGAGACAGGCAG|||||4138|,CCGTGCCCCCCAGGAGGAGACAGGCAG|downstrea…
chr01	3245585	AGTCAATTTAATAGCCAATTCATACAATAG	A	155.68	0/0	0/0	0/0	0/0	0/0	0/0	0/0	0/0	0/0	./.	0/0	0/0	1|1	0/0	0/0	0/0	0/0	0/0	0/0	0/0	0/0	0/0	0/0	0/0	A|upstream_gene_variant|MODIFIER|EPlOSAG00000010527|EPlOSAG00000010527|transcript|EPlOSAT00000011915|lincRNA||n.-4742_-4714delCTATTGTATGAATTGGCTATTAAATTGAC|||||4714|,A|upstream_gene_variant|MODIFIER|OS01G0162001|OS01G0162001|transcript|OS01T0162001-00|protein_coding||c.-1526_-1498delCTATTGTATGAATTGGCTATTAAATTGAC|||||1164|,A|upstream_gene_variant|MODIFIER|OS01G0162101|OS01G0162101|transcript|OS01T…
chr01	3245962	TCCGTCGCCGGCACCAGCTTTATCTGGC	T	898.34	0/0	0/0	1/1	0/0	0/0	1/1	1/1	0/0	0/0	1/1	0/0	0/0	1/1	1/1	0/0	0/0	0/0	0/0	0/0	1/1	0/0	0/0	0/0	0/0	T|upstream_gene_variant|MODIFIER|OS01G0162001|OS01G0162001|transcript|OS01T0162001-00|protein_coding||c.-1901_-1875delGCCAGATAAAGCTGGTGCCGGCGACGG|||||1541|,T|upstream_gene_variant|MODIFIER|OS01G0162101|OS01G0162101|transcript|OS01T0162101-00|protein_coding||c.-643_-617delGCCAGATAAAGCTGGTGCCGGCGACGG|||||520|WARNING_TRANSCRIPT_NO_START_CODON,T|downstream_gene_variant|MODIFIER|EPlOSAG00000018760|EPl…
chr01	3287975	C	CAAACAAAATTTACATTATATTAGATTTATATT	14682.6	0/0	0/0	1/1	0/0	0/0	1/1	1/1	1/1	0/0	1/1	0/0	1/1	1/1	1/1	0/0	0/0	0/0	0/0	0/0	1/1	0/0	0/0	0/0	0/0	CAAACAAAATTTACATTATATTAGATTTATATT|upstream_gene_variant|MODIFIER|OS01G0162900|OS01G0162900|transcript|OS01T0162900-01|protein_coding||c.-4297_-4296insAATATAAATCTAATATAATGTAAATTTTGTTT|||||2979|,CAAACAAAATTTACATTATATTAGATTTATATT|upstream_gene_variant|MODIFIER|EPlOSAG00000017290|EPlOSAG00000017290|transcript|EPlOSAT00000018678|lincRNA||n.-3886_-3885insAATATAAATCTAATATAATGTAAATTTTGTTT|||||3886|,CAAAC…
chr01	3288951	T	TTGGCAGTGTCGAAACGAAGA	20096.1	0/0	0/0	1|1	0/0	0/0	1|1	1|1	.	0/0	1|1	0/0	1/1	1|1	1|1	0/0	0/0	0/0	0/0	0/0	1/1	0/0	0/0	0/0	0/0	TTGGCAGTGTCGAAACGAAGA|upstream_gene_variant|MODIFIER|OS01G0162900|OS01G0162900|transcript|OS01T0162900-01|protein_coding||c.-5273_-5272insTCTTCGTTTCGACACTGCCA|||||3955|,TTGGCAGTGTCGAAACGAAGA|upstream_gene_variant|MODIFIER|EPlOSAG00000017290|EPlOSAG00000017290|transcript|EPlOSAT00000018678|lincRNA||n.-4862_-4861insTCTTCGTTTCGACACTGCCA|||||4862|,TTGGCAGTGTCGAAACGAAGA|upstream_gene_variant|MODIFIER|…
chr01	3289426	CATATATATATATATATATATATATATATATATATATATATATAT	C,CATATATATATATATATATATATATATATATATATATATATATATATAT,CATATATATATATATATATATATATATATATATATATATATATATAT	21674.1	3/3	2/2	1|1	0/0	0/0	1|1	1|1	1|1	0/0	1|1	0/0	1|1	1|1	./.	0/0	0/0	0/0	0/0	0/0	1|1	./.	./.	3/3	0/0	C|upstream_gene_variant|MODIFIER|OS01G0162900|OS01G0162900|transcript|OS01T0162900-01|protein_coding||c.-5791_-5748delATATATATATATATATATATATATATATATATATATATATATAT|||||4430|,CATATATATATATATATATATATATATATATATATATATATATATAT|upstream_gene_variant|MODIFIER|OS01G0162900|OS01G0162900|transcript|OS01T0162900-01|protein_coding||c.-5792_-5791insAT|||||4474|,CATATATATATATATATATATATATATATATATATATATATATATATAT…
chr01	3310375	C	CACCTGCTTTGATGTGTTTTGCAAGT,CACCTGCTTTG	7007.72	0/0	0/0	1|1	0/0	0/0	./.	1|1	1|1	0/0	1|1	0/0	./.	2|2	1|1	0/0	0/0	0/0	0/0	0/0	./.	0/0	0/0	0/0	0/0	CACCTGCTTTG|downstream_gene_variant|MODIFIER|EPlOSAG00000008079|EPlOSAG00000008079|transcript|EPlOSAT00000009467|lincRNA||n.*2566_*2567insACCTGCTTTG|||||2567|,CACCTGCTTTGATGTGTTTTGCAAGT|downstream_gene_variant|MODIFIER|EPlOSAG00000008079|EPlOSAG00000008079|transcript|EPlOSAT00000009467|lincRNA||n.*2566_*2567insACCTGCTTTGATGTGTTTTGCAAGT|||||2567|,CACCTGCTTTG|downstream_gene_variant|MODIFIER|OS01G0…
chr01	3316967	G	GCACCCTTAAGATGGAGATCTA	25378.6	0/0	0/0	1|1	0/0	0/0	1|1	1|1	1|1	0/0	1|1	0/0	1|1	1|1	1|1	0/0	0/0	0/0	0/0	0/0	1|1	0/0	0/0	0/0	0/0	GCACCCTTAAGATGGAGATCTA|upstream_gene_variant|MODIFIER|OS01G0164075|OS01G0164075|transcript|OS01T0164075-00|protein_coding||c.-3762_-3761insTAGATCTCCATCTTAAGGGTG|||||3762|,GCACCCTTAAGATGGAGATCTA|downstream_gene_variant|MODIFIER|OS01G0164300|OS01G0164300|transcript|OS01T0164300-00|protein_coding||c.*3483_*3484insTAGATCTCCATCTTAAGGGTG|||||3483|,GCACCCTTAAGATGGAGATCTA|intergenic_region|MODIFIER|OS01G…
chr01	3673952	CAAATTTAAGGTTAAAAATTTAAATTTTGTCT	C	1635.06	0/0	0/0	1/1	0/0	0/0	0/0	0/0	0/0	0/0	0/0	0/0	0/0	0/0	0/0	0/0	0/0	0/0	0/0	0/0	0/0	0/0	0/0	0/0	0/0	C|upstream_gene_variant|MODIFIER|OS01G0171000|OS01G0171000|transcript|OS01T0171000-01|protein_coding||c.-1232_-1202delAGACAAAATTTAAATTTTTAACCTTAAATTT|||||945|,C|upstream_gene_variant|MODIFIER|EPlOSAG00000032023|EPlOSAG00000032023|transcript|EPlOSAT00000033411|lincRNA||n.-237_-207delAAATTTAAGGTTAAAAATTTAAATTTTGTCT|||||237|,C|upstream_gene_variant|MODIFIER|EPlOSAG00000029018|EPlOSAG00000029018|tran…
chr01	3907573	ATATATATATATATATATATATG	A	37.02	0/0	0/0	0/0	0/0	./.	./.	0/0	0/0	0/0	./.	0/0	0/0	0/0	0/0	0/0	0/0	0/0	0/0	1/1	./.	./.	0/0	0/0	0/0	A|upstream_gene_variant|MODIFIER|EPlOSAG00000020144|EPlOSAG00000020144|transcript|EPlOSAT00000021532|lincRNA||n.-3098_-3077delTATATATATATATATATATATG|||||3098|,A|intergenic_region|MODIFIER|OS01G0175733-EPlOSAG00000020144|OS01G0175733-EPlOSAG00000020144|intergenic_region|OS01G0175733-EPlOSAG00000020144|||n.3907574_3907595delTATATATATATATATATATATG||||||
chr01	4166695	GTTAAGTTTTTTTTTAAGGACGGGAGAGTA	G	51386.7	0/0	1/1	1/1	1/1	1/1	1/1	0/0	0/0	1/1	1/1	1/1	1/1	0/0	1/1	1/1	1/1	1/1	1/1	1/1	1/1	1/1	1/1	1/1	1/1	G|upstream_gene_variant|MODIFIER|OS01G0179700|OS01G0179700|transcript|OS01T0179700-01|protein_coding||c.-2523_-2495delTACTCTCCCGTCCTTAAAAAAAAACTTAA|||||2379|,G|upstream_gene_variant|MODIFIER|EPlOSAG00000042682|EPlOSAG00000042682|transcript|EPlOSAT00000044070|lincRNA||n.-343_-315delTTAAGTTTTTTTTTAAGGACGGGAGAGTA|||||343|,G|downstream_gene_variant|MODIFIER|OS01G0179750|OS01G0179750|transcript|OS01T0…
chr01	4234075	ACAGCTTATTACAGCTCGGAATGCGTTTGGATGCTATGCTTGATGCAG	A	1378.06	0/0	0/0	0/0	0/0	0/0	1/1	0/0	0/0	0/0	0/0	0/0	0/0	0/0	0/0	0/0	0/0	0/0	0/0	0/0	0/0	0/0	0/0	0/0	0/0	A|upstream_gene_variant|MODIFIER|EPlOSAG00000031227|EPlOSAG00000031227|transcript|EPlOSAT00000032615|lincRNA||n.-2861_-2815delCTGCATCAAGCATAGCATCCAAACGCATTCCGAGCTGTAATAAGCTG|||||2815|,A|upstream_gene_variant|MODIFIER|OS01G0180500|OS01G0180500|transcript|OS01T0180500-00|lincRNA||n.-884_-838delCTGCATCAAGCATAGCATCCAAACGCATTCCGAGCTGTAATAAGCTG|||||838|,A|downstream_gene_variant|MODIFIER|EPlOSAG0000003…
chr01	4295419	ATTAGTGGATGATGATGTGGCATCTTG	A	915.06	0/0	0/0	0/0	0/0	0/0	0/0	0/0	0/0	0/0	0/0	0/0	0/0	1/1	0/0	0/0	0/0	0/0	0/0	0/0	0/0	0/0	0/0	0/0	0/0	A|intergenic_region|MODIFIER|OS01G0181300-OS01G0182100|OS01G0181300-OS01G0182100|intergenic_region|OS01G0181300-OS01G0182100|||n.4295420_4295445delTTAGTGGATGATGATGTGGCATCTTG||||||
chr01	4596976	T	TTGATTAGAAACTTCCTTGTTTGTA	76113.5	1/1	1/1	1/1	1/1	1/1	1/1	1/1	0/0	1/1	1/1	1/1	1/1	1/1	1/1	1/1	1/1	1/1	1/1	1/1	1/1	1/1	1/1	1/1	1/1	TTGATTAGAAACTTCCTTGTTTGTA|upstream_gene_variant|MODIFIER|EPlOSAG00000022881|EPlOSAG00000022881|transcript|EPlOSAT00000024269|lincRNA||n.-2710_-2709insTACAAACAAGGAAGTTTCTAATCA|||||2710|,TTGATTAGAAACTTCCTTGTTTGTA|upstream_gene_variant|MODIFIER|EPlOSAG00000011688|EPlOSAG00000011688|transcript|EPlOSAT00000013076|lincRNA||n.-1881_-1880insTACAAACAAGGAAGTTTCTAATCA|||||1881|,TTGATTAGAAACTTCCTTGTTTGTA|int…
chr01	4597911	CATATTCACACACACACACACACACATATATATATATATATATATATATATATATATATATATATATATATATATATATATATATATATAT	C,CATATATATATATATATATATAT	12270.2	1/1	./.	2/2	1/1	./.	./.	./.	0/0	1/1	./.	1/1	0/0	1/1	0/0	1/1	./.	2/2	1/1	./.	0/0	./.	./.	1/1	1/1	C|upstream_gene_variant|MODIFIER|EPlOSAG00000022881|EPlOSAG00000022881|transcript|EPlOSAT00000024269|lincRNA||n.-3734_-3645delATATATATATATATATATATATATATATATATATATATATATATATATATATATATATATATATATGTGTGTGTGTGTGTGTGTGAATAT|||||3645|,CATATATATATATATATATATAT|upstream_gene_variant|MODIFIER|EPlOSAG00000022881|EPlOSAG00000022881|transcript|EPlOSAT00000024269|lincRNA||n.-3716_-3649delATATATATATATATATATATATAT…
chr01	4638957	G	GCATTATCTTCCATGCATTAATC,GCATTATCTTCCATGCA,GCATTATCTTCCA,GCATTATCTTCCATGCATTAA	3905.92	1/1	./.	./.	3/3	./.	2/2	./.	0/0	./.	./.	1/1	./.	./.	1/1	./.	4/4	./.	./.	./.	./.	./.	1/1	./.	./.	GCATTATCTTCCA|upstream_gene_variant|MODIFIER|EPlOSAG00000030837|EPlOSAG00000030837|transcript|EPlOSAT00000032225|lincRNA||n.-1149_-1148insTGGAAGATAATG|||||1149|,GCATTATCTTCCATGCA|upstream_gene_variant|MODIFIER|EPlOSAG00000030837|EPlOSAG00000030837|transcript|EPlOSAT00000032225|lincRNA||n.-1149_-1148insTGCATGGAAGATAATG|||||1149|,GCATTATCTTCCATGCATTAA|upstream_gene_variant|MODIFIER|EPlOSAG000000308…
chr01	4890447	T	TTTTAAGTACCTTCTACAGGTA	18731.9	0/0	0/0	0/0	0/0	0/0	1|1	1|1	0/0	0/0	1|1	0/0	1|1	0/0	1|1	0/0	0/0	0/0	0/0	0/0	0/0	0/0	0/0	0/0	0/0	TTTTAAGTACCTTCTACAGGTA|5_prime_UTR_variant|MODIFIER|OS01G0191400|OS01G0191400|transcript|OS01T0191400-01|protein_coding|1/3|c.-212_-211insTACCTGTAGAAGGTACTTAAA|||||212|,TTTTAAGTACCTTCTACAGGTA|upstream_gene_variant|MODIFIER|OS01G0191300|OS01G0191300|transcript|OS01T0191300-01|protein_coding||c.-4609_-4608insTACCTGTAGAAGGTACTTAAA|||||4608|WARNING_TRANSCRIPT_NO_START_CODON,TTTTAAGTACCTTCTACAGGTA|ups…
chr01	4946123	AGCCGCGCAATTGCGCGGGCCACC	A	12889.9	0/0	0/0	0/0	0/0	0/0	1/1	1/1	0/0	0/0	1/1	0/0	1/1	0/0	1/1	0/0	0/0	0/0	0/0	0/0	0/0	0/0	0/0	0/0	0/0	A|upstream_gene_variant|MODIFIER|OS01G0192101|OS01G0192101|transcript|OS01T0192101-00|protein_coding||c.-4610_-4588delGCCGCGCAATTGCGCGGGCCACC|||||3725|,A|downstream_gene_variant|MODIFIER|OS01G0192000|OS01G0192000|transcript|OS01T0192000-01|protein_coding||c.*3706_*3728delGGTGGCCCGCGCAATTGCGCGGC|||||3009|,A|downstream_gene_variant|MODIFIER|OS01G0192000|OS01G0192000|transcript|OS01T0192000-02|prote…
chr01	4949689	ATAGATATGTACAGGAATTAG	A	13978.9	0/0	0/0	0/0	0/0	0/0	1/1	1/1	0/0	0/0	1/1	0/0	1/1	0/0	1/1	0/0	0/0	0/0	0/0	0/0	0/0	0/0	0/0	0/0	0/0	A|3_prime_UTR_variant|MODIFIER|OS01G0192000|OS01G0192000|transcript|OS01T0192000-01|protein_coding|1/1|c.*143_*162delCTAATTCCTGTACATATCTA|||||143|,A|3_prime_UTR_variant|MODIFIER|OS01G0192000|OS01G0192000|transcript|OS01T0192000-02|protein_coding|1/1|c.*143_*162delCTAATTCCTGTACATATCTA|||||143|WARNING_TRANSCRIPT_NO_START_CODON,A|upstream_gene_variant|MODIFIER|OS01G0192101|OS01G0192101|transcript|OS…
chr01	4952692	A	ATGTAGCCCCTTCTCCCAGGAATGAACACCTC	15177.9	0/0	0/0	0/0	0/0	0/0	1/1	1/1	0/0	0/0	1/1	0/0	1/1	0/0	1/1	0/0	0/0	0/0	0/0	0/0	0/0	0/0	0/0	0/0	0/0	ATGTAGCCCCTTCTCCCAGGAATGAACACCTC|upstream_gene_variant|MODIFIER|OS01G0192000|OS01G0192000|transcript|OS01T0192000-01|protein_coding||c.-1681_-1680insGAGGTGTTCATTCCTGGGAGAAGGGGCTACA|||||1570|,ATGTAGCCCCTTCTCCCAGGAATGAACACCTC|upstream_gene_variant|MODIFIER|EPlOSAG00000052579|EPlOSAG00000052579|transcript|EPlOSAT00000000321|lincRNA||n.-1285_-1284insTGTAGCCCCTTCTCCCAGGAATGAACACCTC|||||1284|,ATGTAGCCC…
chr01	4956453	ATAAGTGTGGGTCGCTGGGGAGCAGCACGCATGCATGGCCATCACGCACGC	A	9622.88	0/0	0/0	0/0	0/0	0/0	1/1	1/1	0/0	0/0	1/1	0/0	1/1	0/0	1/1	0/0	0/0	0/0	0/0	0/0	0/0	0/0	0/0	0/0	0/0	A|downstream_gene_variant|MODIFIER|OS01G0192101|OS01G0192101|transcript|OS01T0192101-00|protein_coding||c.*5334_*5383delTAAGTGTGGGTCGCTGGGGAGCAGCACGCATGCATGGCCATCACGCACGC|||||4946|,A|downstream_gene_variant|MODIFIER|EPlOSAG00000052579|EPlOSAG00000052579|transcript|EPlOSAT00000000321|lincRNA||n.*2376_*2425delTAAGTGTGGGTCGCTGGGGAGCAGCACGCATGCATGGCCATCACGCACGC|||||2376|,A|intergenic_region|MODIFIER|…
chr01	4957280	C	CTTTAGGGACTTATATTTTTGTGAGAGGGGCTGAATTTTTAG	16737.9	0/0	0/0	0/0	0/0	0/0	1/1	1|1	0/0	0/0	1|1	0/0	1|1	0/0	1|1	0/0	0/0	0/0	0/0	0/0	0/0	0/0	0/0	0/0	0/0	CTTTAGGGACTTATATTTTTGTGAGAGGGGCTGAATTTTTAG|downstream_gene_variant|MODIFIER|EPlOSAG00000052579|EPlOSAG00000052579|transcript|EPlOSAT00000000321|lincRNA||n.*3202_*3203insTTTAGGGACTTATATTTTTGTGAGAGGGGCTGAATTTTTAG|||||3203|,CTTTAGGGACTTATATTTTTGTGAGAGGGGCTGAATTTTTAG|downstream_gene_variant|MODIFIER|EPlOSAG00000015146|EPlOSAG00000015146|transcript|EPlOSAT00000016534|lincRNA||n.*4956_*4957insCTAAAAATT…
chr01	4959739	TGACCATTCCTACCAATCTGGATGTCACTTTTCTA	T	6994.88	0/0	0/0	0/0	0/0	0/0	1/1	1/1	0/0	0/0	1/1	0/0	1/1	0/0	1/1	0/0	0/0	0/0	0/0	0/0	0/0	0/0	0/0	0/0	0/0	T|downstream_gene_variant|MODIFIER|EPlOSAG00000015146|EPlOSAG00000015146|transcript|EPlOSAT00000016534|lincRNA||n.*2464_*2497delTAGAAAAGTGACATCCAGATTGGTAGGAATGGTC|||||2497|,T|intergenic_region|MODIFIER|EPlOSAG00000052579-EPlOSAG00000015146|EPlOSAG00000052579-EPlOSAG00000015146|intergenic_region|EPlOSAG00000052579-EPlOSAG00000015146|||n.4959740_4959773delGACCATTCCTACCAATCTGGATGTCACTTTTCTA||||||
chr01	4960094	G	GTTTTTTCTCTTCTAAAGATAAAGATTAAATT	13308.9	0/0	0/0	0/0	0/0	0/0	1/1	1/1	0/0	0/0	1/1	0/0	1/1	0/0	1/1	0/0	0/0	0/0	0/0	0/0	0/0	0/0	0/0	0/0	0/0	GTTTTTTCTCTTCTAAAGATAAAGATTAAATT|downstream_gene_variant|MODIFIER|EPlOSAG00000015146|EPlOSAG00000015146|transcript|EPlOSAT00000016534|lincRNA||n.*2142_*2143insAATTTAATCTTTATCTTTAGAAGAGAAAAAA|||||2142|,GTTTTTTCTCTTCTAAAGATAAAGATTAAATT|intergenic_region|MODIFIER|EPlOSAG00000052579-EPlOSAG00000015146|EPlOSAG00000052579-EPlOSAG00000015146|intergenic_region|EPlOSAG00000052579-EPlOSAG00000015146|||n.49…
chr01	4964420	A	ACGCGGCGCTGCACACGTCGCGCGCCCGGCCGCG	9861.92	0/0	0/0	0/0	0/0	0/0	1/1	1/1	0/0	0/0	1/1	0/0	1/1	0/0	1/1	0/0	0/0	0/0	0/0	0/0	0/0	0/0	0/0	0/0	0/0	ACGCGGCGCTGCACACGTCGCGCGCCCGGCCGCG|upstream_gene_variant|MODIFIER|EPlOSAG00000015146|EPlOSAG00000015146|transcript|EPlOSAT00000016534|lincRNA||n.-2139_-2138insCGCGGCCGGGCGCGCGACGTGTGCAGCGCCGCG|||||2139|,ACGCGGCGCTGCACACGTCGCGCGCCCGGCCGCG|intergenic_region|MODIFIER|EPlOSAG00000015146-OS01G0192300|EPlOSAG00000015146-OS01G0192300|intergenic_region|EPlOSAG00000015146-OS01G0192300|||n.4964420_4964421i…
chr01	4981773	AAATTGAAATTGGAATGAATTGGAAGTTTGGT	A	14823.9	0/0	0/0	0/0	0/0	0/0	1|1	1|1	0/0	0/0	1|1	0/0	1|1	0/0	1|1	0/0	0/0	0/0	0/0	0/0	0/0	0/0	0/0	0/0	0/0	A|3_prime_UTR_variant|MODIFIER|OS01G0192550|OS01G0192550|transcript|OS01T0192550-01|protein_coding|1/1|c.*309_*339delAATTGAAATTGGAATGAATTGGAAGTTTGGT|||||309|,A|upstream_gene_variant|MODIFIER|OS01G0192500|OS01G0192500|transcript|OS01T0192500-00|protein_coding||c.-1776_-1746delACCAAACTTCCAATTCATTCCAATTTCAATT|||||1746|,A|upstream_gene_variant|MODIFIER|OS01G0192700|OS01G0192700|transcript|OS01T019270…
chr01	4982038	A	AAAACAGTGGTAGGAATCTGCGAGTCTTGTGCC	7889.92	0/0	0/0	0/0	0/0	0/0	1/1	1/1	0/0	0/0	1/1	0/0	1/1	0/0	1/1	0/0	0/0	0/0	0/0	0/0	0/0	0/0	0/0	0/0	0/0	AAAACAGTGGTAGGAATCTGCGAGTCTTGTGCC|upstream_gene_variant|MODIFIER|OS01G0192500|OS01G0192500|transcript|OS01T0192500-00|protein_coding||c.-2011_-2010insGGCACAAGACTCGCAGATTCCTACCACTGTTT|||||2011|,AAAACAGTGGTAGGAATCTGCGAGTCTTGTGCC|upstream_gene_variant|MODIFIER|OS01G0192700|OS01G0192700|transcript|OS01T0192700-00|lincRNA||n.-361_-360insAAACAGTGGTAGGAATCTGCGAGTCTTGTGCC|||||360|,AAAACAGTGGTAGGAATCTGCGA…
chr01	6142697	AGTACAACTCGTTCAGTAATTGTGCATGTGAGGATGGAGCTCAAAACATTAACTTGCATGCAATTGCCTATATTATTATCAGGTTATTGTAGGTATGTAGAAGTACCAACTCAT	A	1545.06	0/0	0/0	0/0	0/0	1/1	0/0	0/0	0/0	0/0	0/0	0/0	0/0	0/0	0/0	0/0	0/0	0/0	0/0	0/0	0/0	0/0	0/0	0/0	0/0	A|upstream_gene_variant|MODIFIER|OS01G0212500|OS01G0212500|transcript|OS01T0212500-01|protein_coding||c.-1341_-1229del|||||1054|,A|downstream_gene_variant|MODIFIER|OS01G0212400|OS01G0212400|transcript|OS01T0212400-01|protein_coding||c.*3793_*3905del|||||3562|,A|intergenic_region|MODIFIER|OS01G0212500-EPlOSAG00000006427|OS01G0212500-EPlOSAG00000006427|intergenic_region|OS01G0212500-EPlOSAG00000006…
chr01	6631801	C	CGTGGGTCCACACTACTCTGACAATCGCATCGTCACCTTGTTTT	3383.83	0/0	0/0	0/0	0/0	0/0	0/0	0/0	0/0	0/0	0/0	1|1	0/0	0/0	0/0	0/0	1|1	0/0	0/0	0/0	0/0	0/0	0/0	0/0	0/0	CGTGGGTCCACACTACTCTGACAATCGCATCGTCACCTTGTTTT|upstream_gene_variant|MODIFIER|GH3.3|OS01G0221100|transcript|OS01T0221100-01|protein_coding||c.-1901_-1900insAAAACAAGGTGACGATGCGATTGTCAGAGTAGTGTGGACCCAC|||||1340|,CGTGGGTCCACACTACTCTGACAATCGCATCGTCACCTTGTTTT|upstream_gene_variant|MODIFIER|EPlOSAG00000030534|EPlOSAG00000030534|transcript|EPlOSAT00000031922|lincRNA||n.-1197_-1196insGTGGGTCCACACTACTCTGACA…
chr01	6647566	T	TTATATATATATATATATATATATATA,TTATATATATATATATATATATA,TTATATATATATATATATATATATATATA	2392.92	./.	0/0	0/0	0/0	0/0	./.	0/0	0/0	./.	0/0	./.	0/0	0/0	0/0	0/0	0/0	2|2	0/0	0/0	0/0	0/0	1/1	3/3	0/0	TTATATATATATATATATATATA|upstream_gene_variant|MODIFIER|OS01G0221300|OS01G0221300|transcript|OS01T0221300-01|protein_coding||c.-2410_-2409insTATATATATATATATATATATA|||||2408|WARNING_TRANSCRIPT_NO_START_CODON,TTATATATATATATATATATATATATA|upstream_gene_variant|MODIFIER|OS01G0221300|OS01G0221300|transcript|OS01T0221300-01|protein_coding||c.-2410_-2409insTATATATATATATATATATATATATA|||||2408|WARNING_TRANS…
chr01	6819089	GTAGATACTTAGAGCAGGTACAATAGCAGGCTATAAGCCAGC	G	4471.34	0/0	0/0	0/0	0/0	0/0	0/0	1|1	0/0	0/0	0/0	1|1	0/0	1|1	0/0	0/0	1|1	0/0	0/0	0/0	0/0	0/0	0/0	0/0	0/0	G|upstream_gene_variant|MODIFIER|EPlOSAG00000028920|EPlOSAG00000028920|transcript|EPlOSAT00000030308|lincRNA||n.-3833_-3793delGCTGGCTTATAGCCTGCTATTGTACCTGCTCTAAGTATCTA|||||3793|,G|downstream_gene_variant|MODIFIER|OS01G0224100|OS01G0224100|transcript|OS01T0224100-01|protein_coding||c.*3878_*3918delTAGATACTTAGAGCAGGTACAATAGCAGGCTATAAGCCAGC|||||3556|,G|downstream_gene_variant|MODIFIER|EPlOSAG0000002…
chr01	6861211	A	ATTCACCGTAACACGAGATTCTGG	12831.9	0/0	0/0	0/0	0/0	0/0	0/0	1|1	0/0	0/0	0/0	1|1	1|1	1|1	0/0	0/0	1|1	0/0	0/0	0/0	0/0	0/0	0/0	0/0	0/0	ATTCACCGTAACACGAGATTCTGG|downstream_gene_variant|MODIFIER|OS01G0224700|OS01G0224700|transcript|OS01T0224700-01|protein_coding||c.*732_*733insTTCACCGTAACACGAGATTCTGG|||||260|,ATTCACCGTAACACGAGATTCTGG|intergenic_region|MODIFIER|OS01G0224700-OS01G0225000|OS01G0224700-OS01G0225000|intergenic_region|OS01G0224700-OS01G0225000|||n.6861211_6861212insTTCACCGTAACACGAGATTCTGG||||||
chr01	6866325	G	GCCACGATACAACAGGGTTCC	11794.9	0/0	0/0	0/0	0/0	0/0	0/0	1|1	0/0	0/0	0/0	1|1	1|1	1|1	0/0	0/0	1|1	0/0	0/0	0/0	0/0	0/0	0/0	0/0	0/0	GCCACGATACAACAGGGTTCC|intergenic_region|MODIFIER|OS01G0224700-OS01G0225000|OS01G0224700-OS01G0225000|intergenic_region|OS01G0224700-OS01G0225000|||n.6866325_6866326insCCACGATACAACAGGGTTCC||||||
chr01	6872751	CCGTTTCCGTATAAGGGATAT	C	4814.88	0/0	0/0	0/0	0/0	0/0	0/0	1/1	0/0	0/0	0/0	1/1	1/1	1/1	0/0	0/0	1/1	0/0	0/0	0/0	0/0	0/0	0/0	0/0	0/0	C|intergenic_region|MODIFIER|OS01G0224700-OS01G0225000|OS01G0224700-OS01G0225000|intergenic_region|OS01G0224700-OS01G0225000|||n.6872752_6872771delCGTTTCCGTATAAGGGATAT||||||
chr01	6915152	AATATATATATATATATATAT	A	7544.28	0/0	0/0	0/0	0/0	0/0	0/0	1/1	0/0	0/0	0/0	1/1	1/1	1/1	0/0	0/0	1/1	0/0	0/0	0/0	0/0	0/0	0/0	0/0	0/0	A|upstream_gene_variant|MODIFIER|OS01G0225400|OS01G0225400|transcript|OS01T0225400-01|protein_coding||c.-4474_-4455delATATATATATATATATATAT|||||4453|WARNING_TRANSCRIPT_NO_START_CODON,A|upstream_gene_variant|MODIFIER|KPHMT2|OS01G0225500|transcript|OS01T0225500-00|protein_coding||c.-121_-102delATATATATATATATATATAT|||||26|,A|upstream_gene_variant|MODIFIER|EPlOSAG00000020489|EPlOSAG00000020489|transcr…
chr01	6918855	TAATTTACATATATTATAAAA	T	6359.65	0/0	0/0	0/0	0/0	0/0	0/0	1/1	0/0	0/0	0/0	1/1	1/1	1/1	0/0	0/0	1/1	0/0	0/0	0/0	0/0	0/0	0/0	0/0	0/0	T|upstream_gene_variant|MODIFIER|KPHMT2|OS01G0225500|transcript|OS01T0225500-00|protein_coding||c.-3824_-3805delTTTTATAATATATGTAAATT|||||3729|,T|upstream_gene_variant|MODIFIER|EPlOSAG00000025819|EPlOSAG00000025819|transcript|EPlOSAT00000027207|lincRNA||n.-2337_-2318delTTTTATAATATATGTAAATT|||||2318|,T|upstream_gene_variant|MODIFIER|OS01G0225550|OS01G0225550|transcript|OS01T0225550-01|protein_codin…
chr01	6919054	ATATATATATATATATATATATATATATATATATATAT	A	2547.54	./.	./.	0/0	./.	./.	0/0	0/0	0/0	./.	0/0	./.	1|1	./.	0/0	0/0	./.	0/0	./.	./.	./.	0/0	0/0	0/0	./.	A|upstream_gene_variant|MODIFIER|KPHMT2|OS01G0225500|transcript|OS01T0225500-00|protein_coding||c.-4040_-4004delATATATATATATATATATATATATATATATATATATA|||||3928|,A|upstream_gene_variant|MODIFIER|EPlOSAG00000025819|EPlOSAG00000025819|transcript|EPlOSAT00000027207|lincRNA||n.-2553_-2517delATATATATATATATATATATATATATATATATATATA|||||2517|,A|upstream_gene_variant|MODIFIER|OS01G0225550|OS01G0225550|transc…
chr01	6924310	GAAATCGAAACGATATATCGCTAAT	G	6082.88	0/0	0/0	0/0	0/0	0/0	0/0	1|1	0/0	0/0	0/0	1|1	1|1	1|1	0/0	0/0	1|1	0/0	0/0	0/0	0/0	0/0	0/0	0/0	0/0	G|upstream_gene_variant|MODIFIER|OS01G0225600|OS01G0225600|transcript|OS01T0225600-00|protein_coding||c.-1647_-1624delATTAGCGATATATCGTTTCGATTT|||||1549|,G|upstream_gene_variant|MODIFIER|EPlOSAG00000000483|EPlOSAG00000000483|transcript|EPlOSAT00000001871|lincRNA||n.-951_-928delATTAGCGATATATCGTTTCGATTT|||||928|,G|upstream_gene_variant|MODIFIER|EPlOSAG00000010286|EPlOSAG00000010286|transcript|EPlOSA…
chr01	7037751	A	AATATATATATATATATATATATATATATAT,AATATATATATATATATATATATATATATATAT	1680.72	0/0	0/0	1/1	0/0	./.	0/0	0/0	./.	0/0	./.	0/0	0/0	0/0	0/0	0/0	0/0	2/2	0/0	0/0	0/0	0/0	0/0	1/1	0/0	AATATATATATATATATATATATATATATAT|upstream_gene_variant|MODIFIER|OS01G0227200|OS01G0227200|transcript|OS01T0227200-01|protein_coding||c.-633_-632insATATATATATATATATATATATATATATAT|||||351|,AATATATATATATATATATATATATATATATAT|upstream_gene_variant|MODIFIER|OS01G0227200|OS01G0227200|transcript|OS01T0227200-01|protein_coding||c.-633_-632insATATATATATATATATATATATATATATATAT|||||351|,AATATATATATATATATATATAT…
chr01	7057770	T	TATGCGAACACAAGGCCCATATACACACGTGCACCTTTACCCAAAAATGAAA	508.48	0/0	0/0	0/0	0/0	0/0	0/0	0/0	0/0	0/0	0/0	0/0	1/1	0/0	0/0	0/0	0/0	0/0	0/0	0/0	0/0	0/0	0/0	0/0	0/0	TATGCGAACACAAGGCCCATATACACACGTGCACCTTTACCCAAAAATGAAA|upstream_gene_variant|MODIFIER|EPlOSAG00000033014|EPlOSAG00000033014|transcript|EPlOSAT00000034402|lincRNA||n.-1195_-1194insATGCGAACACAAGGCCCATATACACACGTGCACCTTTACCCAAAAATGAAA|||||1194|,TATGCGAACACAAGGCCCATATACACACGTGCACCTTTACCCAAAAATGAAA|upstream_gene_variant|MODIFIER|OS01G0227700|OS01G0227700|transcript|OS01T0227700-01|protein_coding||c.-3631…
chr01	7059375	CCATACCTCCCATATGCCTTGG	C	11686	0/0	0/0	0/0	0/0	0/0	0/0	1/1	0/0	0/0	0/0	1/1	1/1	1/1	0/0	0/0	1/1	0/0	0/0	0/0	0/0	0/0	0/0	0/0	1/1	C|upstream_gene_variant|MODIFIER|EPlOSAG00000034082|EPlOSAG00000034082|transcript|EPlOSAT00000035470|lincRNA||n.-270_-250delCCAAGGCATATGGGAGGTATG|||||250|,C|upstream_gene_variant|MODIFIER|OS01G0227700|OS01G0227700|transcript|OS01T0227700-01|protein_coding||c.-2025_-2005delCATACCTCCCATATGCCTTGG|||||2001|,C|upstream_gene_variant|MODIFIER|EPlOSAG00000026644|EPlOSAG00000026644|transcript|EPlOSAT00000…
chr01	7065092	CGAGTTTGGGACTTCATCACTAGACATGAGT	C	6775.35	0/0	0/0	0/0	0/0	1/1	0/0	1/1	0/0	0/0	0/0	1/1	1/1	1/1	0/0	0/0	1/1	0/0	0/0	0/0	0/0	0/0	0/0	0/0	1/1	C|conservative_inframe_deletion|MODERATE|OS01G0227700|OS01G0227700|transcript|OS01T0227700-01|protein_coding|2/2|c.1525_1554delTTTGGGACTTCATCACTAGACATGAGTGAG|p.Phe509_Glu518del|1549/1702|1525/1620|509/539||INFO_REALIGN_3_PRIME,C|upstream_gene_variant|MODIFIER|EPlOSAG00000012688|EPlOSAG00000012688|transcript|EPlOSAT00000014076|lincRNA||n.-280_-251delGAGTTTGGGACTTCATCACTAGACATGAGT|||||280|,C|downst…
chr01	7091611	T	TTATGAAATATATAAAACTATA	12495	0/0	0/0	0/0	0/0	0/0	0/0	1|1	0/0	0/0	0/0	1|1	1|1	1|1	0/0	0/0	1|1	0/0	0/0	0/0	0/0	0/0	0/0	0/0	1|1	TTATGAAATATATAAAACTATA|upstream_gene_variant|MODIFIER|OS01G0228300|OS01G0228300|transcript|OS01T0228300-01|protein_coding||c.-2495_-2494insTATAGTTTTATATATTTCATA|||||2440|,TTATGAAATATATAAAACTATA|upstream_gene_variant|MODIFIER|OS01G0228400|OS01G0228400|transcript|OS01T0228400-01|protein_coding||c.-1359_-1358insTATGAAATATATAAAACTATA|||||422|,TTATGAAATATATAAAACTATA|downstream_gene_variant|MODIFIER|EP…
chr01	7112117	C	CCACTCCTTGTTTGCATCGGTTTGGAAGCCTG	12516	0/0	0/0	0/0	0/0	0/0	0/0	1/1	0/0	0/0	0/0	1/1	1/1	1/1	0/0	0/0	1/1	0/0	0/0	0/0	0/0	0/0	0/0	0/0	1/1	CCACTCCTTGTTTGCATCGGTTTGGAAGCCTG|upstream_gene_variant|MODIFIER|OS01G0228800|OS01G0228800|transcript|OS01T0228800-01|protein_coding||c.-4281_-4280insCAGGCTTCCAAACCGATGCAAACAAGGAGTG|||||3023|,CCACTCCTTGTTTGCATCGGTTTGGAAGCCTG|upstream_gene_variant|MODIFIER|EPlOSAG00000039005|EPlOSAG00000039005|transcript|EPlOSAT00000040393|lincRNA||n.-2517_-2516insCAGGCTTCCAAACCGATGCAAACAAGGAGTG|||||2517|,CCACTCCTT…
chr01	7696283	T	TTATATATATATATATATATATATATATATATATA	820.05	0/0	0/0	0/0	0/0	0/0	./.	0/0	0/0	0/0	./.	0/0	0/0	0/0	1/1	0/0	0/0	0/0	0/0	0/0	./.	0/0	0/0	0/0	0/0	TTATATATATATATATATATATATATATATATATA|upstream_gene_variant|MODIFIER|GLK2|OS01G0239000|transcript|OS01T0239000-02|protein_coding||c.-2863_-2862insTATATATATATATATATATATATATATATATATA|||||2503|,TTATATATATATATATATATATATATATATATATA|upstream_gene_variant|MODIFIER|EPlOSAG00000038625|EPlOSAG00000038625|transcript|EPlOSAT00000040013|lincRNA||n.-4382_-4381insTATATATATATATATATATATATATATATATATA|||||4381|,TTATA…
chr01	7822358	A	AATATATATATATATATATATATATATATATATATATAT	463.1	0/0	./.	0/0	./.	./.	0/0	./.	./.	./.	./.	./.	0/0	./.	0/0	0/0	./.	1/1	0/0	0/0	./.	./.	0/0	0/0	0/0	AATATATATATATATATATATATATATATATATATATAT|downstream_gene_variant|MODIFIER|GRXS3|OS01G0241400|transcript|OS01T0241400-01|protein_coding||c.*4163_*4164insATATATATATATATATATATATATATATATATATATAT|||||3965|,AATATATATATATATATATATATATATATATATATATAT|intergenic_region|MODIFIER|GRXS3-EPlOSAG00000021703|OS01G0241400-EPlOSAG00000021703|intergenic_region|OS01G0241400-EPlOSAG00000021703|||n.7822358_7822359insATA…
chr01	8046972	G	GGGAGTACACACCGAGCGGGACAGGGGA	9439.01	0/0	0/0	0/0	0/0	1/1	0/0	0/0	0/0	0/0	0/0	1/1	0/0	1/1	1/1	0/0	1/1	0/0	0/0	0/0	0/0	1/1	0/0	0/0	0/0	GGGAGTACACACCGAGCGGGACAGGGGA|downstream_gene_variant|MODIFIER|OS01G0246100|OS01G0246100|transcript|OS01T0246100-01|protein_coding||c.*846_*847insTCCCCTGTCCCGCTCGGTGTGTACTCC|||||415|,GGGAGTACACACCGAGCGGGACAGGGGA|intergenic_region|MODIFIER|OS01G0245901-OS01G0246100|OS01G0245901-OS01G0246100|intergenic_region|OS01G0245901-OS01G0246100|||n.8046972_8046973insGGAGTACACACCGAGCGGGACAGGGGA||||||
chr01	8773534	T	TTATATATATATATATATATA	69.97	./.	0/0	0/0	0/0	0/0	0/0	0/0	0/0	0/0	0/0	./.	0/0	./.	1/1	0/0	0/0	0/0	0/0	0/0	./.	./.	0/0	0/0	0/0	TTATATATATATATATATATA|downstream_gene_variant|MODIFIER|OS01G0260800|OS01G0260800|transcript|OS01T0260800-01|protein_coding||c.*267_*268insTATATATATATATATATATA|||||25|,TTATATATATATATATATATA|intergenic_region|MODIFIER|OS01G0260800-EPlOSAG00000016398|OS01G0260800-EPlOSAG00000016398|intergenic_region|OS01G0260800-EPlOSAG00000016398|||n.8773534_8773535insTATATATATATATATATATA||||||
chr01	9226066	TTTCCTCATCTATGTGTTTATTATAGCAAATAAACACATAGATGAGGAAATC	T	5475.34	0/0	1/1	0/0	0/0	0/0	1/1	0/0	0/0	0/0	1/1	0/0	0/0	0/0	0/0	0/0	0/0	0/0	0/0	0/0	0/0	0/0	1/1	0/0	0/0	T|upstream_gene_variant|MODIFIER|EPlOSAG00000040215|EPlOSAG00000040215|transcript|EPlOSAT00000041603|lincRNA||n.-1324_-1274delTTCCTCATCTATGTGTTTATTATAGCAAATAAACACATAGATGAGGAAATC|||||1324|,T|downstream_gene_variant|MODIFIER|EPlOSAG00000040199|EPlOSAG00000040199|transcript|EPlOSAT00000041587|lincRNA||n.*1274_*1324delGATTTCCTCATCTATGTGTTTATTTGCTATAATAAACACATAGATGAGGAA|||||1324|,T|downstream_gene_var…
chr01	9562747	TACTCAAATGCACAAATAACGAATAG	T	60726.4	1/1	1/1	1/1	1/1	1/1	1/1	1/1	0/0	1/1	1/1	1/1	1/1	1/1	1/1	1/1	1/1	1/1	1/1	1/1	1/1	1/1	1/1	1/1	1/1	T|3_prime_UTR_variant|MODIFIER|OS01G0274601|OS01G0274601|transcript|OS01T0274601-01|protein_coding|1/1|c.*572_*596delCAAATGCACAAATAACGAATAGACT|||||572|INFO_REALIGN_3_PRIME,T|downstream_gene_variant|MODIFIER|OS01G0274800|OS01G0274800|transcript|OS01T0274800-01|protein_coding||c.*5275_*5299delCTATTCGTTATTTGTGCATTTGAGT|||||4780|
chr01	9727151	ATATATATATATATATGTGTGTGTGTGTGTGTGTGTGTGTGTGTGTGTGTGTGTGTGTGTGTGTGTGTGTG	A,ATGTGTGTGTG	5930.07	0/0	0/0	0/0	0/0	0/0	1|1	0/0	0/0	0/0	0/0	0/0	0/0	0/0	2/2	0/0	0/0	0/0	0/0	./.	0/0	0/0	1/1	0/0	0/0	A|upstream_gene_variant|MODIFIER|EPlOSAG00000026688|EPlOSAG00000026688|transcript|EPlOSAT00000028076|lincRNA||n.-1755_-1686delCACACACACACACACACACACACACACACACACACACACACACACACACACACACATATATATATATATA|||||1686|,ATGTGTGTGTG|upstream_gene_variant|MODIFIER|EPlOSAG00000026688|EPlOSAG00000026688|transcript|EPlOSAT00000028076|lincRNA||n.-1746_-1687delACACACACACACACACACACACACACACACACACACACACACACACATATATATAT…
chr01	9793780	T	TGTACAAGTGCAGTATTGAGAAGGTATTTTCTTA	7774.91	0/0	0/0	0/0	0/0	1/1	0/0	1/1	0/0	0/0	0/0	0/0	0/0	1/1	1/1	0/0	1/1	0/0	0/0	0/0	0/0	0/0	0/0	0/0	0/0	TGTACAAGTGCAGTATTGAGAAGGTATTTTCTTA|upstream_gene_variant|MODIFIER|OS01G0278100|OS01G0278100|transcript|OS01T0278100-01|protein_coding||c.-4696_-4695insTAAGAAAATACCTTCTCAATACTGCACTTGTAC|||||4010|WARNING_TRANSCRIPT_NO_START_CODON,TGTACAAGTGCAGTATTGAGAAGGTATTTTCTTA|downstream_gene_variant|MODIFIER|OS01G0278200|OS01G0278200|transcript|OS01T0278200-01|protein_coding||c.*1097_*1098insTAAGAAAATACCTTCTCA…
chr01	9799183	TTTCACAGTCCAGGTAATATGGCCCATGGG	T	8568.88	0/0	0/0	0/0	0/0	1|1	0/0	1|1	0/0	0/0	0/0	0/0	0/0	1|1	1|1	0/0	1|1	0/0	0/0	0/0	0/0	0/0	0/0	0/0	0/0	T|upstream_gene_variant|MODIFIER|OS01G0278200|OS01G0278200|transcript|OS01T0278200-01|protein_coding||c.-4167_-4139delCCCATGGGCCATATTACCTGGACTGTGAA|||||3051|WARNING_TRANSCRIPT_NO_START_CODON,T|upstream_gene_variant|MODIFIER|EPlOSAG00000029425|EPlOSAG00000029425|transcript|EPlOSAT00000030813|lincRNA||n.-1025_-997delTTCACAGTCCAGGTAATATGGCCCATGGG|||||1025|,T|downstream_gene_variant|MODIFIER|EPlOSAG0…
chr01	9810898	A	AATATATATATATATATATATATATATATATAT	232.03	0/0	0/0	1/1	0/0	0/0	0/0	0/0	0/0	./.	0/0	./.	0/0	0/0	0/0	0/0	0/0	0/0	0/0	./.	./.	0/0	0/0	0/0	0/0	AATATATATATATATATATATATATATATATAT|upstream_gene_variant|MODIFIER|OS01G0278466|OS01G0278466|transcript|OS01T0278466-00|lincRNA||n.-1344_-1343insATATATATATATATATATATATATATATATAT|||||1344|,AATATATATATATATATATATATATATATATAT|downstream_gene_variant|MODIFIER|EPlOSAG00000013015|EPlOSAG00000013015|transcript|EPlOSAT00000014403|lincRNA||n.*1305_*1306insATATATATATATATATATATATATATATATAT|||||1305|,AATATATATA…
chr01	9921736	CACAACGCCGTTAAATCCTGGAAAATTCGCCTATCACTGAAAGCACAACGCCGTTAAATCCTGG	C,*	8166.34	2/2	2/2	2/2	2/2	1/1	2/2	1/1	0/0	2/2	2/2	2/2	2/2	1/1	1/1	2/2	1/1	2/2	2/2	0/0	2/2	2/2	2/2	2/2	2/2	C|upstream_gene_variant|MODIFIER|OS01G0279800|OS01G0279800|transcript|OS01T0279800-01|protein_coding||c.-301_-239delCCAGGATTTAACGGCGTTGTGCTTTCAGTGATAGGCGAATTTTCCAGGATTTAACGGCGTTGT|||||172|,C|upstream_gene_variant|MODIFIER|OS01G0279800|OS01G0279800|transcript|OS01T0279800-02|protein_coding||c.-301_-239delCCAGGATTTAACGGCGTTGTGCTTTCAGTGATAGGCGAATTTTCCAGGATTTAACGGCGTTGT|||||172|,C|downstream_gene_var…
chr01	10299123	G	GATATATATATATATATATATATAT	405.43	0/0	0/0	0/0	0/0	0/0	0/0	0/0	0/0	0/0	./.	0/0	0/0	0/0	0/0	0/0	0/0	0/0	0/0	0/0	0/0	0/0	0/0	1/1	0/0	GATATATATATATATATATATATAT|downstream_gene_variant|MODIFIER|PPOX1|OS01G0286600|transcript|OS01T0286600-01|protein_coding||c.*3921_*3922insATATATATATATATATATATATAT|||||3675|,GATATATATATATATATATATATAT|intergenic_region|MODIFIER|PPOX1-EPlOSAG00000035723|OS01G0286600-EPlOSAG00000035723|intergenic_region|OS01G0286600-EPlOSAG00000035723|||n.10299123_10299124insATATATATATATATATATATATAT||||||
chr01	10982846	ATTCAAGAATCAAATACTCTCTCTCTCTCTCTCTCTCTTC	A	6965.33	0/0	0/0	1/1	0/0	0/0	0/0	0/0	0/0	0/0	0/0	1/1	0/0	0/0	0/0	0/0	0/0	1/1	0/0	0/0	0/0	1/1	0/0	0/0	0/0	A|5_prime_UTR_variant|MODIFIER|OS01G0299500|OS01G0299500|transcript|OS01T0299500-01|protein_coding|2/5|c.-157_-119delGAAGAGAGAGAGAGAGAGAGAGAGTATTTGATTCTTGAA|||||119|,A|upstream_gene_variant|MODIFIER|OS01G0299801|OS01G0299801|transcript|OS01T0299801-00|protein_coding||c.-3493_-3455delTTCAAGAATCAAATACTCTCTCTCTCTCTCTCTCTCTTC|||||3493|WARNING_TRANSCRIPT_NO_START_CODON,A|downstream_gene_variant|MODIFI…
chr01	11068944	C	CATATGGATTTTAGCACGTTACATATAACACCAGGTACTATGATCCTAGAGTTTCACAG	43904.4	0/0	1/1	1/1	0/0	1/1	1/1	1/1	0/0	0/0	1/1	1/1	0/0	1/1	1/1	1/1	1/1	1/1	0/0	./.	0/0	1/1	1/1	0/0	1/1	CATATGGATTTTAGCACGTTACATATAACACCAGGTACTATGATCCTAGAGTTTCACAG|upstream_gene_variant|MODIFIER|OS01G0301000|OS01G0301000|transcript|OS01T0301000-01|protein_coding||c.-236_-235insCTGTGAAACTCTAGGATCATAGTACCTGGTGTTATATGTAACGTGCTAAAATCCATAT|||||171|,CATATGGATTTTAGCACGTTACATATAACACCAGGTACTATGATCCTAGAGTTTCACAG|upstream_gene_variant|MODIFIER|OS01G0301100|OS01G0301100|transcript|OS01T0301100-01|protein_codin…
chr01	11237467	T	TAGTCAATATTATAAGCTGGAGTCGC	6015.83	0/0	1/1	0/0	0/0	0/0	0/0	0/0	0/0	0/0	0/0	0/0	0/0	0/0	0/0	0/0	0/0	0/0	0/0	0/0	0/0	0/0	1/1	0/0	0/0	TAGTCAATATTATAAGCTGGAGTCGC|upstream_gene_variant|MODIFIER|OS01G0303600|OS01G0303600|transcript|OS01T0303600-01|protein_coding||c.-2755_-2754insGCGACTCCAGCTTATAATATTGACT|||||2659|,TAGTCAATATTATAAGCTGGAGTCGC|intergenic_region|MODIFIER|OS01G0303600-EPlOSAG00000010010|OS01G0303600-EPlOSAG00000010010|intergenic_region|OS01G0303600-EPlOSAG00000010010|||n.11237467_11237468insAGTCAATATTATAAGCTGGAGTCGC|||…
chr01	11241310	CCCTTACTAAAAATATCTCTAAGGAAACTAGAAAATGTGCTAATTAATAGATACTATTGCCCTTCTTAGGACCCCTAT	C	1623.79	0/0	1/1	0/0	0/0	0/0	0/0	0/0	0/0	0/0	0/0	0/0	0/0	0/0	0/0	0/0	0/0	0/0	0/0	0/0	0/0	0/0	1/1	0/0	0/0	C|upstream_gene_variant|MODIFIER|OS01G0303800|OS01G0303800|transcript|OS01T0303800-01|protein_coding||c.-4146_-4070delCCTTACTAAAAATATCTCTAAGGAAACTAGAAAATGTGCTAATTAATAGATACTATTGCCCTTCTTAGGACCCCTAT|||||3942|,C|upstream_gene_variant|MODIFIER|OS01G0303800|OS01G0303800|transcript|OS01T0303800-02|protein_coding||c.-4146_-4070delCCTTACTAAAAATATCTCTAAGGAAACTAGAAAATGTGCTAATTAATAGATACTATTGCCCTTCTTAGGACCCCT…
chr01	11247181	TCCTGCACCACCTCGCCAGTGAGCTCGAGCGCCTTAGCCATG	T	2697.79	0/0	1/1	0/0	0/0	0/0	0/0	0/0	0/0	0/0	0/0	0/0	0/0	0/0	0/0	0/0	0/0	0/0	0/0	0/0	0/0	0/0	1/1	0/0	0/0	T|upstream_gene_variant|MODIFIER|EPlOSAG00000010010|EPlOSAG00000010010|transcript|EPlOSAT00000011398|lincRNA||n.-4555_-4515delCATGGCTAAGGCGCTCGAGCTCACTGGCGAGGTGGTGCAGG|||||4515|,T|downstream_gene_variant|MODIFIER|OS01G0303800|OS01G0303800|transcript|OS01T0303800-01|protein_coding||c.*697_*737delCCTGCACCACCTCGCCAGTGAGCTCGAGCGCCTTAGCCATG|||||445|,T|downstream_gene_variant|MODIFIER|OS01G0304000|OS01…
chr01	11249550	C	CTAATTTCACAGTTGAACTTACAGGGTGA	5070.83	0/0	1/1	0/0	0/0	0/0	0/0	0/0	0/0	0/0	0/0	0/0	0/0	0/0	0/0	0/0	0/0	0/0	0/0	0/0	0/0	0/0	1/1	0/0	0/0	CTAATTTCACAGTTGAACTTACAGGGTGA|upstream_gene_variant|MODIFIER|OS01G0304050|OS01G0304050|transcript|OS01T0304050-01|lincRNA||n.-4077_-4076insTAATTTCACAGTTGAACTTACAGGGTGA|||||4076|,CTAATTTCACAGTTGAACTTACAGGGTGA|downstream_gene_variant|MODIFIER|OS01G0303800|OS01G0303800|transcript|OS01T0303800-01|protein_coding||c.*3065_*3066insTAATTTCACAGTTGAACTTACAGGGTGA|||||2814|,CTAATTTCACAGTTGAACTTACAGGGTGA|down…
chr01	11268139	G	GCCTTGATGCGTTGCACACGGTTGCA	5166.83	0/0	1|1	0/0	0/0	0/0	0/0	0/0	0/0	0/0	0/0	0/0	0/0	0/0	0/0	0/0	0/0	0/0	0/0	0/0	0/0	0/0	1|1	0/0	0/0	GCCTTGATGCGTTGCACACGGTTGCA|upstream_gene_variant|MODIFIER|EPlOSAG00000033364|EPlOSAG00000033364|transcript|EPlOSAT00000034752|lincRNA||n.-4549_-4548insTGCAACCGTGTGCAACGCATCAAGG|||||4549|,GCCTTGATGCGTTGCACACGGTTGCA|upstream_gene_variant|MODIFIER|OS01G0304300|OS01G0304300|transcript|OS01T0304300-01|protein_coding||c.-4805_-4804insCCTTGATGCGTTGCACACGGTTGCA|||||4019|,GCCTTGATGCGTTGCACACGGTTGCA|downst…
chr01	11337535	AATCCCCCTCTCTCTCTCCCTCGGCCCAAGCCGGCCCGCAGCCAAGCCGCCAGCCCGCGTGCGCG	A	9134.95	0/0	0/0	0/0	0/0	1/1	1/1	0/0	0/0	0/0	1/1	1/1	0/0	1/1	1/1	0/0	1/1	0/0	0/0	0/0	0/0	0/0	0/0	0/0	1/1	A|upstream_gene_variant|MODIFIER|EPlOSAG00000026464|EPlOSAG00000026464|transcript|EPlOSAT00000027852|lincRNA||n.-4277_-4214delATCCCCCTCTCTCTCTCCCTCGGCCCAAGCCGGCCCGCAGCCAAGCCGCCAGCCCGCGTGCGCG|||||4277|,A|intergenic_region|MODIFIER|EPlOSAG00000026490-EPlOSAG00000026464|EPlOSAG00000026490-EPlOSAG00000026464|intergenic_region|EPlOSAG00000026490-EPlOSAG00000026464|||n.11337536_11337599delATCCCCCTCTCTC…
chr01	11341846	G	GTACCAACCGGGAGTAAAGATTTATCTTTAGTCCCGGTTGAAGT	11889.6	0/0	1/1	1/1	0/0	0/0	1/1	1/1	0/0	0/0	1/1	1/1	0/0	1/1	1/1	1/1	0/0	1/1	0/0	0/0	0/0	1/1	1/1	0/0	1/1	GTACCAACCGGGAGTAAAGATTTATCTTTAGTCCCGGTTGAAGT|upstream_gene_variant|MODIFIER|EPlOSAG00000002816|EPlOSAG00000002816|transcript|EPlOSAT00000004204|lincRNA||n.-877_-876insTACCAACCGGGAGTAAAGATTTATCTTTAGTCCCGGTTGAAGT|||||876|,GTACCAACCGGGAGTAAAGATTTATCTTTAGTCCCGGTTGAAGT|upstream_gene_variant|MODIFIER|EPlOSAG00000051767|EPlOSAG00000051767|transcript|EPlOSAT00000001133|lincRNA||n.-1806_-1805insTACCAACCGG…
chr01	11358341	AGAGGGTGTTACCTTGATGTATAGGGATGAGTTTGATTCTTCCTTTTGAAGTGTTTCTC	A	24948.3	0/0	1/1	1/1	0/0	1/1	1/1	1/1	0/0	0/0	1/1	1/1	0/0	1/1	1/1	1/1	1/1	1/1	0/0	./.	0/0	1/1	1/1	0/0	1/1	A|downstream_gene_variant|MODIFIER|OS01G0305900|OS01G0305900|transcript|OS01T0305900-01|protein_coding||c.*1719_*1776delGAGGGTGTTACCTTGATGTATAGGGATGAGTTTGATTCTTCCTTTTGAAGTGTTTCTC|||||1479|,A|intergenic_region|MODIFIER|OS01G0305900-OS01G0306100|OS01G0305900-OS01G0306100|intergenic_region|OS01G0305900-OS01G0306100|||n.11358342_11358399delGAGGGTGTTACCTTGATGTATAGGGATGAGTTTGATTCTTCCTTTTGAAGTGTTTCTC|||…
chr01	11374118	T	TGTTGAACTTCTCAAAATCCCTCTCGTCGTTGTCTG	29769.1	0/0	1/1	1/1	0/0	1/1	1/1	1/1	0/0	0/0	1/1	1/1	0/0	1/1	1/1	1/1	1/1	1/1	0/0	0/0	0/0	1/1	1/1	0/0	1/1	TGTTGAACTTCTCAAAATCCCTCTCGTCGTTGTCTG|upstream_gene_variant|MODIFIER|EPlOSAG00000013625|EPlOSAG00000013625|transcript|EPlOSAT00000015013|lincRNA||n.-4107_-4106insGTTGAACTTCTCAAAATCCCTCTCGTCGTTGTCTG|||||4106|,TGTTGAACTTCTCAAAATCCCTCTCGTCGTTGTCTG|upstream_gene_variant|MODIFIER|OS01G0306400|OS01G0306400|transcript|OS01T0306400-01|protein_coding||c.-4819_-4818insGTTGAACTTCTCAAAATCCCTCTCGTCGTTGTCTG||||…
chr01	11393330	C	CCGGCCGCTTCTGCGATTCGCGAGGTGCGG,CCGGCCGCTTCTGCGATTCGCGAGGTGCGGGG,CCGGCCGCTTCTGCGATTCGCGAGGTGCG,CCGGCCGCTTCTGCGATTCGCGAGGTGCGGG,CCGGCCGCTTCTGCGATTCGCGAGGTGCGGGGGTACGGCCAGGCTATAGGGCCATGTGGCTG,CCGGCCGCTTCTGCGATTCGCGAGGTGCGGGGGTACGGCCAGGCTATAGG	4385.45	0/0	./.	5|5	0/0	1|1	2|2	./.	0/0	0/0	./.	3|3	0/0	./.	6|6	./.	./.	./.	0/0	./.	0/0	./.	./.	0/0	4|4	CCGGCCGCTTCTGCGATTCGCGAGGTGCG|downstream_gene_variant|MODIFIER|EPlOSAG00000007740|EPlOSAG00000007740|transcript|EPlOSAT00000009128|lincRNA||n.*45_*46insCGGCCGCTTCTGCGATTCGCGAGGTGCG|||||46|,CCGGCCGCTTCTGCGATTCGCGAGGTGCGG|downstream_gene_variant|MODIFIER|EPlOSAG00000007740|EPlOSAG00000007740|transcript|EPlOSAT00000009128|lincRNA||n.*45_*46insCGGCCGCTTCTGCGATTCGCGAGGTGCGG|||||46|,CCGGCCGCTTCTGCGATTC…
chr01	11393332	A	ATTCGCGAGGTGCGGGGGTACGGCCAGGCTATAGGGCCATGTGGC	1274.77	0/0	./.	./.	0/0	./.	./.	./.	0/0	0/0	./.	./.	0/0	./.	./.	./.	./.	1|1	0/0	./.	0/0	./.	./.	0/0	./.	ATTCGCGAGGTGCGGGGGTACGGCCAGGCTATAGGGCCATGTGGC|downstream_gene_variant|MODIFIER|EPlOSAG00000007740|EPlOSAG00000007740|transcript|EPlOSAT00000009128|lincRNA||n.*47_*48insTTCGCGAGGTGCGGGGGTACGGCCAGGCTATAGGGCCATGTGGC|||||48|,ATTCGCGAGGTGCGGGGGTACGGCCAGGCTATAGGGCCATGTGGC|intergenic_region|MODIFIER|EPlOSAG00000007740-OS01G0306800|EPlOSAG00000007740-OS01G0306800|intergenic_region|EPlOSAG00000007740-OS01…
chr01	11423111	T	TACTTTCTCGGAAAATTAATGTTGATAA	45792.7	0/0	1/1	1/1	0/0	1/1	1/1	1/1	0/0	0/0	1/1	1/1	0/0	1/1	1/1	1/1	1/1	1/1	0/0	./.	0/0	1/1	1/1	0/0	1/1	TACTTTCTCGGAAAATTAATGTTGATAA|downstream_gene_variant|MODIFIER|OS01G0306800|OS01G0306800|transcript|OS01T0306800-01|protein_coding||c.*2398_*2399insACTTTCTCGGAAAATTAATGTTGATAA|||||2065|,TACTTTCTCGGAAAATTAATGTTGATAA|downstream_gene_variant|MODIFIER|OS01G0306900|OS01G0306900|transcript|OS01T0306900-01|protein_coding||c.*3716_*3717insTTATCAACATTAATTTTCCGAGAAAGT|||||3335|,TACTTTCTCGGAAAATTAATGTTGATAA|…
chr01	11424904	A	ACAATTTTCATATAGAATTTAAAT	35119.5	0/0	1|1	1/1	0/0	1/1	1/1	1/1	0/0	0/0	1/1	1/1	0/0	1/1	1/1	1/1	1/1	1/1	0/0	./.	0/0	1/1	1/1	0/0	1/1	ACAATTTTCATATAGAATTTAAAT|downstream_gene_variant|MODIFIER|OS01G0306800|OS01G0306800|transcript|OS01T0306800-01|protein_coding||c.*4191_*4192insCAATTTTCATATAGAATTTAAAT|||||3858|,ACAATTTTCATATAGAATTTAAAT|downstream_gene_variant|MODIFIER|OS01G0306900|OS01G0306900|transcript|OS01T0306900-01|protein_coding||c.*1923_*1924insATTTAAATTCTATATGAAAATTG|||||1542|,ACAATTTTCATATAGAATTTAAAT|downstream_gene_vari…
chr01	11509691	T	TTCTGGGCACGAGGTGTCCTATGCGTTATCCC	5553.16	0/0	0/0	1/1	0/0	0/0	0/0	0/0	0/0	0/0	1/1	0/0	0/0	0/0	1/1	0/0	0/0	1/1	0/0	./.	0/0	0/0	0/0	0/0	0/0	TTCTGGGCACGAGGTGTCCTATGCGTTATCCC|upstream_gene_variant|MODIFIER|EPlOSAG00000028846|EPlOSAG00000028846|transcript|EPlOSAT00000030234|lincRNA||n.-4735_-4734insGGGATAACGCATAGGACACCTCGTGCCCAGA|||||4735|,TTCTGGGCACGAGGTGTCCTATGCGTTATCCC|upstream_gene_variant|MODIFIER|OS01G0307686|OS01G0307686|transcript|OS01T0307686-00|protein_coding||c.-3589_-3588insGGGATAACGCATAGGACACCTCGTGCCCAGA|||||3574|,TTCTGGGCA…
chr01	11548759	GTATA	GTATATATATATGTATGTATGTATATA,G	1964.89	./.	0/0	2|2	0/0	./.	./.	0/0	./.	0/0	./.	0/0	1/1	./.	0/0	0/0	./.	2|2	./.	0/0	./.	./.	0/0	./.	./.	G|upstream_gene_variant|MODIFIER|OS01G0308600|OS01G0308600|transcript|OS01T0308600-00|protein_coding||c.-3469_-3466delTATA|||||3330|,GTATATATATATGTATGTATGTATATA|upstream_gene_variant|MODIFIER|OS01G0308600|OS01G0308600|transcript|OS01T0308600-00|protein_coding||c.-3470_-3469insTATATACATACATACATATATA|||||3334|,G|downstream_gene_variant|MODIFIER|EPlOSAG00000030121|EPlOSAG00000030121|transcript|EPlOS…
chr01	11629716	TAGTTGCCAAAATTTTGGCATTTGCCAAAATTTTGGCAA	T	32556.9	0/0	1/1	1/1	0/0	1/1	1/1	1/1	0/0	0/0	1/1	1/1	0/0	1/1	1/1	1/1	./.	1/1	0/0	1/1	0/0	1/1	1/1	0/0	1/1	T|upstream_gene_variant|MODIFIER|OS01G0310032|OS01G0310032|transcript|OS01T0310032-00|protein_coding||c.-5074_-5037delTTGCCAAAATTTTGGCAAATGCCAAAATTTTGGCAACT|||||4882|,T|upstream_gene_variant|MODIFIER|EPlOSAG00000002166|EPlOSAG00000002166|transcript|EPlOSAT00000003554|lincRNA||n.-217_-180delTTGCCAAAATTTTGGCAAATGCCAAAATTTTGGCAACT|||||180|,T|intron_variant|MODIFIER|OS01G0310100|OS01G0310100|transcri…
chr01	12094144	G	GTATATATATATATATATATATATATATA	471.71	0/0	0/0	./.	0/0	0/0	./.	0/0	0/0	./.	0/0	0/0	0/0	0/0	1/1	0/0	0/0	0/0	0/0	0/0	0/0	./.	0/0	0/0	0/0	GTATATATATATATATATATATATATATA|upstream_gene_variant|MODIFIER|OS01G0318202|OS01G0318202|transcript|OS01T0318202-01|protein_coding||c.-836_-835insTATATATATATATATATATATATATATA|||||440|WARNING_TRANSCRIPT_INCOMPLETE,GTATATATATATATATATATATATATATA|upstream_gene_variant|MODIFIER|EPlOSAG00000026678|EPlOSAG00000026678|transcript|EPlOSAT00000028066|lincRNA||n.-2856_-2855insTATATATATATATATATATATATATATA|||||2…
chr01	12095296	GATATATATATATATATATATATATATATAATATATATATATATATATAT	G	264.88	0/0	0/0	0/0	0/0	0/0	./.	1/1	0/0	0/0	0/0	0/0	0/0	0/0	0/0	0/0	./.	0/0	0/0	0/0	0/0	0/0	0/0	0/0	./.	G|upstream_gene_variant|MODIFIER|OS01G0318202|OS01G0318202|transcript|OS01T0318202-01|protein_coding||c.-2036_-1988delATATATATATATATATATATTATATATATATATATATATATATATATAT|||||1592|WARNING_TRANSCRIPT_INCOMPLETE,G|upstream_gene_variant|MODIFIER|EPlOSAG00000026678|EPlOSAG00000026678|transcript|EPlOSAT00000028066|lincRNA||n.-1703_-1655delATATATATATATATATATATATATATATAATATATATATATATATATAT|||||1703|,G|down…
chr01	12141441	A	AATATATATATATATATATATATATATATAT,AATATATATATATATATATATATATATATATATATAT	892.82	0/0	0/0	0/0	0/0	0/0	./.	0/0	0/0	0/0	0/0	0/0	0/0	./.	0/0	0/0	0/0	1/1	0/0	0/0	0/0	0/0	2/2	./.	0/0	AATATATATATATATATATATATATATATAT|upstream_gene_variant|MODIFIER|EPlOSAG00000015545|EPlOSAG00000015545|transcript|EPlOSAT00000016933|lincRNA||n.-4546_-4545insATATATATATATATATATATATATATATAT|||||4546|,AATATATATATATATATATATATATATATATATATAT|upstream_gene_variant|MODIFIER|EPlOSAG00000015545|EPlOSAG00000015545|transcript|EPlOSAT00000016933|lincRNA||n.-4546_-4545insATATATATATATATATATATATATATATATATATAT||||…
chr01	12338697	GAAAACTTTCAAGTCAAAATTTA	G	28913.2	1/1	0/0	1/1	0/0	0/0	0/0	1/1	0/0	1/1	0/0	0/0	1/1	0/0	0/0	1/1	0/0	1/1	./.	1/1	1/1	1/1	0/0	1/1	1/1	G|upstream_gene_variant|MODIFIER|OS01G0323100|OS01G0323100|transcript|OS01T0323100-01|protein_coding||c.-2459_-2438delTAAATTTTGACTTGAAAGTTTT|||||1473|,G|upstream_gene_variant|MODIFIER|EPlOSAG00000048186|EPlOSAG00000048186|transcript|EPlOSAT00000049574|lincRNA||n.-1664_-1643delTAAATTTTGACTTGAAAGTTTT|||||1643|,G|downstream_gene_variant|MODIFIER|EPlOSAG00000009306|EPlOSAG00000009306|transcript|EPlOS…
chr01	12684453	A	AATATATATATATATATATATATATATATATATATATAT	620.59	0/0	./.	0/0	0/0	0/0	0/0	0/0	0/0	0/0	0/0	0/0	0/0	0/0	1/1	0/0	0/0	0/0	0/0	./.	0/0	0/0	0/0	0/0	./.	AATATATATATATATATATATATATATATATATATATAT|upstream_gene_variant|MODIFIER|OS01G0329000|OS01G0329000|transcript|OS01T0329000-01|protein_coding||c.-1026_-1025insATATATATATATATATATATATATATATATATATATAT|||||999|,AATATATATATATATATATATATATATATATATATATAT|downstream_gene_variant|MODIFIER|OS01G0329075|OS01G0329075|transcript|OS01T0329075-00|protein_coding||c.*6421_*6422insATATATATATATATATATATATATATATATATATATA…
chr01	13350418	GTCGGCTCCGCCGCCGCCTGCA	G,GTCGGCTCCGCCGCCGCCTGCATCGGCTCCGCCGCCGCCTGCA	16553.8	0/0	1/1	0/0	0/0	2/2	1/1	2/2	0/0	0/0	1/1	1/1	0/0	2/2	1/1	0/0	1/1	0/0	0/0	0/0	0/0	0/0	1/1	0/0	0/0	G|upstream_gene_variant|MODIFIER|OS01G0339500|OS01G0339500|transcript|OS01T0339500-01|protein_coding||c.-5155_-5135delTGCAGGCGGCGGCGGAGCCGA|||||4555|,GTCGGCTCCGCCGCCGCCTGCATCGGCTCCGCCGCCGCCTGCA|upstream_gene_variant|MODIFIER|OS01G0339500|OS01G0339500|transcript|OS01T0339500-01|protein_coding||c.-5156_-5155insTGCAGGCGGCGGCGGAGCCGA|||||4576|,G|upstream_gene_variant|MODIFIER|PDIL2-2|OS01G0339900|tra…
chr01	13491815	G	GTATATATATATATATATATATATATATATATATATATATATATA	570.65	0/0	0/0	0/0	0/0	0/0	./.	0/0	0/0	./.	./.	0/0	0/0	0/0	1/1	./.	0/0	0/0	0/0	0/0	0/0	0/0	0/0	0/0	0/0	GTATATATATATATATATATATATATATATATATATATATATATA|upstream_gene_variant|MODIFIER|EPlOSAG00000016233|EPlOSAG00000016233|transcript|EPlOSAT00000017621|lincRNA||n.-130_-129insTATATATATATATATATATATATATATATATATATATATATATA|||||129|,GTATATATATATATATATATATATATATATATATATATATATATA|downstream_gene_variant|MODIFIER|EPlOSAG00000021176|EPlOSAG00000021176|transcript|EPlOSAT00000022564|lincRNA||n.*1100_*1101insTATAT…
chr01	14000882	ACAGGAAGTTCCGGACATTTTGT	A	1995.06	0/0	0/0	0/0	0/0	1/1	0/0	0/0	0/0	0/0	0/0	0/0	0/0	0/0	0/0	0/0	0/0	0/0	0/0	0/0	0/0	0/0	0/0	0/0	0/0	A|downstream_gene_variant|MODIFIER|EPlOSAG00000002189|EPlOSAG00000002189|transcript|EPlOSAT00000003577|lincRNA||n.*36_*57delACAAAATGTCCGGAACTTCCTG|||||57|,A|non_coding_transcript_exon_variant|MODIFIER|EPlOSAG00000049969|EPlOSAG00000049969|transcript|EPlOSAT00000051357|lincRNA|1/1|n.63_84delACATTTTGTCAGGAAGTTCCGG||||||INFO_REALIGN_3_PRIME
chr01	14119570	G	GCATAGCATTACCTTTAGATGAA	1993.1	0/0	0/0	0/0	0/0	1/1	0/0	0/0	0/0	0/0	0/0	0/0	0/0	0/0	0/0	0/0	0/0	0/0	0/0	0/0	0/0	0/0	0/0	0/0	0/0	GCATAGCATTACCTTTAGATGAA|intergenic_region|MODIFIER|OS01G0352100-EPlOSAG00000046104|OS01G0352100-EPlOSAG00000046104|intergenic_region|OS01G0352100-EPlOSAG00000046104|||n.14119570_14119571insCATAGCATTACCTTTAGATGAA||||||
chr01	14153120	A	AGGGGAGGCGAGTGCGACGCCG	1718.1	0/0	0/0	0/0	0/0	1/1	0/0	0/0	0/0	0/0	0/0	0/0	0/0	0/0	0/0	0/0	0/0	0/0	0/0	0/0	0/0	0/0	0/0	0/0	0/0	AGGGGAGGCGAGTGCGACGCCG|intergenic_region|MODIFIER|EPlOSAG00000002273-EPlOSAG00000022053|EPlOSAG00000002273-EPlOSAG00000022053|intergenic_region|EPlOSAG00000002273-EPlOSAG00000022053|||n.14153120_14153121insGGGGAGGCGAGTGCGACGCCG||||||
chr01	14194477	G	GATCACCTCTATGGCTAGCTTTTGGAGTGGT	2545.1	0/0	0/0	0/0	0/0	1|1	0/0	0/0	0/0	0/0	0/0	0/0	0/0	0/0	0/0	0/0	0/0	0/0	0/0	0/0	0/0	0/0	0/0	0/0	0/0	GATCACCTCTATGGCTAGCTTTTGGAGTGGT|upstream_gene_variant|MODIFIER|OS01G0353900|OS01G0353900|transcript|OS01T0353900-02|protein_coding||c.-3108_-3107insATCACCTCTATGGCTAGCTTTTGGAGTGGT|||||2875|WARNING_TRANSCRIPT_NO_START_CODON,GATCACCTCTATGGCTAGCTTTTGGAGTGGT|upstream_gene_variant|MODIFIER|OS01G0353900|OS01G0353900|transcript|OS01T0353900-01|protein_coding||c.-4691_-4690insATCACCTCTATGGCTAGCTTTTGGAGTGG…
chr01	14206889	GTCGGTTCTAAAGAAGAACCGGCACCTA	G	1854.06	0/0	0/0	0/0	0/0	1/1	0/0	0/0	0/0	0/0	0/0	0/0	0/0	0/0	0/0	0/0	0/0	0/0	0/0	0/0	0/0	0/0	0/0	0/0	0/0	G|upstream_gene_variant|MODIFIER|EPlOSAG00000037105|EPlOSAG00000037105|transcript|EPlOSAT00000038493|lincRNA||n.-2238_-2212delTAGGTGCCGGTTCTTCTTTAGAACCGA|||||2212|,G|upstream_gene_variant|MODIFIER|EPlOSAG00000001011|EPlOSAG00000001011|transcript|EPlOSAT00000002399|lincRNA||n.-2260_-2234delTAGGTGCCGGTTCTTCTTTAGAACCGA|||||2234|,G|downstream_gene_variant|MODIFIER|EPlOSAG00000037307|EPlOSAG0000003730…
chr01	14447197	TCAGCATCTGCCCTTTTGAATTCGCCAAGAGC	T	12795.4	0/0	1/1	0/0	0/0	0/0	1/1	0/0	0/0	0/0	1/1	1/1	0/0	0/0	1/1	0/0	1/1	0/0	0/0	0/0	0/0	0/0	1/1	0/0	0/0	T|5_prime_UTR_variant|MODIFIER|OS01G0357100|OS01G0357100|transcript|OS01T0357100-01|protein_coding|1/5|c.-201_-171delAGCCAGCATCTGCCCTTTTGAATTCGCCAAG|||||171|INFO_REALIGN_3_PRIME,T|upstream_gene_variant|MODIFIER|EPlOSAG00000012682|EPlOSAG00000012682|transcript|EPlOSAT00000014070|lincRNA||n.-4697_-4667delGCTCTTGGCGAATTCAAAAGGGCAGATGCTG|||||4667|,T|upstream_gene_variant|MODIFIER|EPlOSAG00000005703|E…
chr01	14620174	TGGCGGACGGAGCAAAGGGGCGGAGTGGTGCAGAGCAGAGGGCGCGGAGCGGC	T	1522.7	0/0	0/0	0/0	0/0	1/1	0/0	0/0	0/0	0/0	0/0	0/0	0/0	0/0	0/0	0/0	0/0	0/0	0/0	0/0	0/0	0/0	0/0	0/0	0/0	T|upstream_gene_variant|MODIFIER|OS01G0360333|OS01G0360333|transcript|OS01T0360333-00|protein_coding||c.-2626_-2575delGGCGGACGGAGCAAAGGGGCGGAGTGGTGCAGAGCAGAGGGCGCGGAGCGGC|||||1392|,T|downstream_gene_variant|MODIFIER|RBOHB|OS01G0360200|transcript|OS01T0360200-01|protein_coding||c.*1394_*1445delGCCGCTCCGCGCCCTCTGCTCTGCACCACTCCGCCCCTTTGCTCCGTCCGCC|||||1336|,T|downstream_gene_variant|MODIFIER|RBOHB|O…
chr01	14625773	CAACACTAGAAGTGTTTTCAGAG	C	2342.06	0/0	0/0	0/0	0/0	1/1	0/0	0/0	0/0	0/0	0/0	0/0	0/0	0/0	0/0	0/0	0/0	0/0	0/0	0/0	0/0	0/0	0/0	0/0	0/0	C|splice_acceptor_variant&splice_region_variant&3_prime_UTR_variant&intron_variant|HIGH|OS01G0360333|OS01G0360333|transcript|OS01T0360333-00|protein_coding|10/12|c.*938-16_*943delAACACTAGAAGTGTTTTCAGAG|||||2338|,C|splice_region_variant|LOW|OS01G0360333|OS01G0360333|transcript|OS01T0360333-00|protein_coding|10/12|c.*938-16_*943delAACACTAGAAGTGTTTTCAGAG||||||,C|upstream_gene_variant|MODIFIER|EPlOSA…
chr01	14627521	AAAAGAAGAAGAAGAAGAAGAAGAAG	A	2293.06	0/0	0/0	0/0	0/0	1|1	0/0	0/0	0/0	0/0	0/0	0/0	0/0	0/0	0/0	0/0	0/0	0/0	0/0	0/0	0/0	0/0	0/0	0/0	0/0	A|upstream_gene_variant|MODIFIER|RBOHB|OS01G0360200|transcript|OS01T0360200-03|protein_coding||c.-926_-902delCTTCTTCTTCTTCTTCTTCTTCTTT|||||894|,A|downstream_gene_variant|MODIFIER|OS01G0360333|OS01G0360333|transcript|OS01T0360333-00|protein_coding||c.*4086_*4110delAAAGAAGAAGAAGAAGAAGAAGAAG|||||970|,A|downstream_gene_variant|MODIFIER|EPlOSAG00000000316|EPlOSAG00000000316|transcript|EPlOSAT000000017…
chr01	14630064	G	GCCTATGTTTAATATTCTAATAT	1926.1	0/0	0/0	0/0	0/0	1/1	0/0	0/0	0/0	0/0	0/0	0/0	0/0	0/0	0/0	0/0	0/0	0/0	0/0	0/0	0/0	0/0	0/0	0/0	0/0	GCCTATGTTTAATATTCTAATAT|upstream_gene_variant|MODIFIER|RBOHB|OS01G0360200|transcript|OS01T0360200-01|protein_coding||c.-3445_-3444insATATTAGAATATTAAACATAGG|||||2131|,GCCTATGTTTAATATTCTAATAT|upstream_gene_variant|MODIFIER|RBOHB|OS01G0360200|transcript|OS01T0360200-03|protein_coding||c.-3445_-3444insATATTAGAATATTAAACATAGG|||||3437|,GCCTATGTTTAATATTCTAATAT|downstream_gene_variant|MODIFIER|OS01G03603…
chr01	14633274	GTACATTGTGACGTTTTTGTT	G	1186.06	0/0	0/0	0/0	0/0	1|1	0/0	0/0	0/0	0/0	0/0	0/0	0/0	0/0	0/0	0/0	0/0	0/0	0/0	0/0	0/0	0/0	0/0	0/0	0/0	G|intergenic_region|MODIFIER|RBOHB-EPlOSAG00000028706|OS01G0360200-EPlOSAG00000028706|intergenic_region|OS01G0360200-EPlOSAG00000028706|||n.14633275_14633294delTACATTGTGACGTTTTTGTT||||||
chr01	14658439	C	CGGATCCCTATCCGAAGTAAGCTCATATT	18400.2	1/1	1/1	1/1	1|1	0/0	1/1	1|1	1/1	0/0	1/1	1|1	1/1	0/0	1/1	1/1	1|1	1/1	1|1	0/0	1/1	1/1	1/1	1/1	1|1	CGGATCCCTATCCGAAGTAAGCTCATATT|downstream_gene_variant|MODIFIER|EPlOSAG00000021298|EPlOSAG00000021298|transcript|EPlOSAT00000022686|lincRNA||n.*2476_*2477insGGATCCCTATCCGAAGTAAGCTCATATT|||||2477|,CGGATCCCTATCCGAAGTAAGCTCATATT|downstream_gene_variant|MODIFIER|EPlOSAG00000052729|EPlOSAG00000052729|transcript|EPlOSAT00000000171|lincRNA||n.*543_*544insGGATCCCTATCCGAAGTAAGCTCATATT|||||544|,CGGATCCCTATC…
chr01	14847534	T	TATTAAGTTCTTCTCTTATTAGCCTATGTAC	456.39	0/0	1|1	0/0	0/0	./.	./.	0/0	0/0	0/0	0/0	./.	0/0	0/0	./.	0/0	./.	0/0	0/0	0/0	0/0	0/0	./.	0/0	0/0	TATTAAGTTCTTCTCTTATTAGCCTATGTAC|intergenic_region|MODIFIER|EPlOSAG00000003069-EPlOSAG00000007545|EPlOSAG00000003069-EPlOSAG00000007545|intergenic_region|EPlOSAG00000003069-EPlOSAG00000007545|||n.14847534_14847535insATTAAGTTCTTCTCTTATTAGCCTATGTAC||||||
chr01	14908276	TATATATATATATATATATATATATATA	T	7142.15	0/0	1|1	0/0	0/0	0/0	1|1	0/0	0/0	0/0	./.	0/0	0/0	0/0	1|1	0/0	1|1	0/0	0/0	./.	0/0	./.	1|1	0/0	0/0	T|upstream_gene_variant|MODIFIER|EPlOSAG00000033329|EPlOSAG00000033329|transcript|EPlOSAT00000034717|lincRNA||n.-3424_-3398delATATATATATATATATATATATATATA|||||3424|,T|downstream_gene_variant|MODIFIER|EPlOSAG00000033098|EPlOSAG00000033098|transcript|EPlOSAT00000034486|lincRNA||n.*3398_*3424delTATATATATATATATATATATATATAT|||||3424|,T|intron_variant|MODIFIER|OS01G0365000|OS01G0365000|transcript|OS01T0…
chr01	15416391	G	GACAATATGCTGCCTGGACACGATATAA	1290.1	0/0	0/0	0/0	0/0	0/0	0/0	0/0	0/0	0/0	0/0	0/0	0/0	0/0	0/0	0/0	0/0	0/0	1/1	0/0	0/0	0/0	0/0	0/0	0/0	GACAATATGCTGCCTGGACACGATATAA|upstream_gene_variant|MODIFIER|OS01G0374100|OS01G0374100|transcript|OS01T0374100-00|lincRNA||n.-4469_-4468insTTATATCGTGTCCAGGCAGCATATTGT|||||4469|,GACAATATGCTGCCTGGACACGATATAA|downstream_gene_variant|MODIFIER|OS01G0374000|OS01G0374000|transcript|OS01T0374000-01|protein_coding||c.*4459_*4460insACAATATGCTGCCTGGACACGATATAA|||||4311|,GACAATATGCTGCCTGGACACGATATAA|downstrea…
chr01	15541726	C	CCCGGTGTTCTTGAGCATGGTTGGGCGAATT	12169	0/0	1/1	0/0	0/0	1/1	1/1	0/0	0/0	0/0	1/1	1/1	0/0	0/0	1/1	0/0	1/1	0/0	0/0	0/0	0/0	0/0	1/1	0/0	0/0	CCCGGTGTTCTTGAGCATGGTTGGGCGAATT|upstream_gene_variant|MODIFIER|OS01G0376200|OS01G0376200|transcript|OS01T0376200-01|lincRNA||n.-277_-276insCCGGTGTTCTTGAGCATGGTTGGGCGAATT|||||276|,CCCGGTGTTCTTGAGCATGGTTGGGCGAATT|downstream_gene_variant|MODIFIER|EPlOSAG00000010365|EPlOSAG00000010365|transcript|EPlOSAT00000011753|lincRNA||n.*3323_*3324insCCGGTGTTCTTGAGCATGGTTGGGCGAATT|||||3324|,CCCGGTGTTCTTGAGCATGGT…
chr01	15786773	T	TCTTTCATATGCTACTTATATATG	753.67	0/0	1/1	0/0	0/0	./.	./.	0/0	0/0	0/0	./.	./.	0/0	0/0	./.	0/0	./.	0/0	0/0	0/0	0/0	0/0	1/1	0/0	0/0	TCTTTCATATGCTACTTATATATG|upstream_gene_variant|MODIFIER|EPlOSAG00000007942|EPlOSAG00000007942|transcript|EPlOSAT00000009330|lincRNA||n.-87_-86insCTTTCATATGCTACTTATATATG|||||86|,TCTTTCATATGCTACTTATATATG|downstream_gene_variant|MODIFIER|EPlOSAG00000051327|EPlOSAG00000051327|transcript|EPlOSAT00000052715|lincRNA||n.*81_*82insCATATATAAGTAGCATATGAAAG|||||81|,TCTTTCATATGCTACTTATATATG|intergenic_region|…
chr01	15823631	TTTCCTCCCCTCTTATTAGCCAGCTTGCCCACAAGCTGGAGC	T	2054.06	0/0	0/0	0/0	0/0	0/0	0/0	0/0	0/0	0/0	1/1	0/0	0/0	0/0	0/0	0/0	0/0	0/0	0/0	0/0	0/0	0/0	0/0	0/0	0/0	T|intergenic_region|MODIFIER|EPlOSAG00000002613-EPlOSAG00000004390|EPlOSAG00000002613-EPlOSAG00000004390|intergenic_region|EPlOSAG00000002613-EPlOSAG00000004390|||n.15823632_15823672delTTCCTCCCCTCTTATTAGCCAGCTTGCCCACAAGCTGGAGC||||||
chr01	15946268	GGGCGACTCGGTCTGGAGGAGATGGA	G	19833	0/0	1|1	0/0	0/0	1|1	1|1	0/0	0/0	0/0	1|1	1|1	0/0	0/0	1|1	0/0	1|1	0/0	0/0	0/0	0/0	0/0	1|1	0/0	0/0	G|upstream_gene_variant|MODIFIER|OS01G0382200|OS01G0382200|transcript|OS01T0382200-01|protein_coding||c.-2564_-2540delGGCGACTCGGTCTGGAGGAGATGGA|||||2564|WARNING_TRANSCRIPT_NO_START_CODON,G|intergenic_region|MODIFIER|EPlOSAG00000000428-OS01G0382200|EPlOSAG00000000428-OS01G0382200|intergenic_region|EPlOSAG00000000428-OS01G0382200|||n.15946269_15946293delGGCGACTCGGTCTGGAGGAGATGGA||||||
chr01	16321517	T	TTATATATATATATATATATA	419.89	0/0	0/0	0/0	0/0	0/0	0/0	0/0	0/0	0/0	0/0	./.	0/0	0/0	1/1	0/0	0/0	0/0	0/0	0/0	0/0	0/0	0/0	0/0	0/0	TTATATATATATATATATATA|upstream_gene_variant|MODIFIER|OS01G0387865|OS01G0387865|transcript|OS01T0387865-01|protein_coding||c.-2812_-2811insTATATATATATATATATATA|||||1213|,TTATATATATATATATATATA|upstream_gene_variant|MODIFIER|EPlOSAG00000036349|EPlOSAG00000036349|transcript|EPlOSAT00000037737|lincRNA||n.-2624_-2623insTATATATATATATATATATA|||||2623|,TTATATATATATATATATATA|downstream_gene_variant|MODIFIE…
chr01	16743871	AATATATATATATATATATATATATATATATATATATATATATATATATATATATATATAT	A	2454.18	./.	0/0	0/0	0/0	0/0	0/0	0/0	0/0	0/0	0/0	0/0	0/0	0/0	1/1	0/0	0/0	0/0	0/0	./.	0/0	0/0	1/1	0/0	0/0	A|intergenic_region|MODIFIER|EPlOSAG00000007271-EPlOSAG00000048755|EPlOSAG00000007271-EPlOSAG00000048755|intergenic_region|EPlOSAG00000007271-EPlOSAG00000048755|||n.16743872_16743931delATATATATATATATATATATATATATATATATATATATATATATATATATATATATATAT||||||
chr01	17326132	ATATATATGTGTATATATTTTG	A	3278.79	0/0	0/0	0/0	0/0	0/0	0/0	0/0	1/1	0/0	0/0	0/0	0/0	1/1	0/0	0/0	0/0	0/0	0/0	0/0	0/0	0/0	0/0	0/0	0/0	A|upstream_gene_variant|MODIFIER|OS01G0501000|OS01G0501000|transcript|OS01T0501000-01|protein_coding||c.-2383_-2363delCAAAATATATACACATATATA|||||373|,A|upstream_gene_variant|MODIFIER|EPlOSAG00000016903|EPlOSAG00000016903|transcript|EPlOSAT00000018291|lincRNA||n.-1888_-1868delCAAAATATATACACATATATA|||||1868|,A|downstream_gene_variant|MODIFIER|EPlOSAG00000027352|EPlOSAG00000027352|transcript|EPlOSAT0…
chr01	17405250	T	TGTACTCGTGTGGCCGGTATGGATACTTGAAGG	20033	0/0	1/1	0/0	0/0	1/1	1/1	0/0	0/0	0/0	1/1	1/1	0/0	0/0	1/1	0/0	1/1	0/0	0/0	0/0	0/0	0/0	1/1	0/0	0/0	TGTACTCGTGTGGCCGGTATGGATACTTGAAGG|downstream_gene_variant|MODIFIER|OS01G0502400|OS01G0502400|transcript|OS01T0502400-01|protein_coding||c.*1136_*1137insGTACTCGTGTGGCCGGTATGGATACTTGAAGG|||||831|,TGTACTCGTGTGGCCGGTATGGATACTTGAAGG|downstream_gene_variant|MODIFIER|EPlOSAG00000012074|EPlOSAG00000012074|transcript|EPlOSAT00000013462|lincRNA||n.*4339_*4340insCCTTCAAGTATCCATACCGGCCACACGAGTAC|||||4339|,TG…
chr01	17513832	T	TGTGACACAGTCCGAGTCCGG,TATGCCCGG	967.16	1/1	./.	0/0	0/0	./.	./.	0/0	./.	0/0	./.	./.	0/0	./.	./.	0/0	./.	0/0	0/0	0/0	0/0	0/0	2|2	0/0	0/0	TATGCCCGG|upstream_gene_variant|MODIFIER|OS01G0504500|OS01G0504500|transcript|OS01T0504500-02|protein_coding||c.-1565_-1564insCCGGGCAT|||||1528|,TGTGACACAGTCCGAGTCCGG|upstream_gene_variant|MODIFIER|OS01G0504500|OS01G0504500|transcript|OS01T0504500-02|protein_coding||c.-1565_-1564insCCGGACTCGGACTGTGTCAC|||||1528|,TATGCCCGG|upstream_gene_variant|MODIFIER|OS01G0504500|OS01G0504500|transcript|OS01T05…
chr01	17836224	GACTTTCCAAACCAACCGTTACTT	G	5426.79	0/0	0/0	0/0	0/0	0/0	0/0	0/0	1/1	0/0	0/0	0/0	0/0	1/1	0/0	0/0	0/0	0/0	0/0	0/0	0/0	0/0	0/0	0/0	0/0	G|intergenic_region|MODIFIER|EPlOSAG00000031710-EPlOSAG00000045392|EPlOSAG00000031710-EPlOSAG00000045392|intergenic_region|EPlOSAG00000031710-EPlOSAG00000045392|||n.17836225_17836247delACTTTCCAAACCAACCGTTACTT||||||
chr01	18296058	TGGCAGGAAGATGGGGAGCCTTTGGGTCA	T	16881.9	0/0	1/1	0/0	0/0	1/1	1/1	0/0	0/0	0/0	1/1	1/1	0/0	0/0	1/1	0/0	1/1	0/0	0/0	0/0	0/0	0/0	1/1	0/0	0/0	T|downstream_gene_variant|MODIFIER|EPlOSAG00000020951|EPlOSAG00000020951|transcript|EPlOSAT00000022339|lincRNA||n.*1146_*1173delTGACCCAAAGGCTCCCCATCTTCCTGCC|||||1173|,T|downstream_gene_variant|MODIFIER|OS01G0516700|OS01G0516700|transcript|OS01T0516700-01|protein_coding||c.*4903_*4930delTGACCCAAAGGCTCCCCATCTTCCTGCC|||||2162|,T|intron_variant|MODIFIER|OS01G0516625|OS01G0516625|transcript|OS01T05166…
chr01	18410096	A	ATATGTATATGTATATATATATGTATG	297.54	0/0	0/0	0/0	0/0	0/0	0/0	0/0	1/1	0/0	0/0	0/0	0/0	0/0	0/0	0/0	0/0	0/0	0/0	0/0	0/0	0/0	0/0	0/0	0/0	ATATGTATATGTATATATATATGTATG|upstream_gene_variant|MODIFIER|OS01G0518651|OS01G0518651|transcript|OS01T0518651-00|protein_coding||c.-2024_-2023insCATACATATATATATACATATACATA|||||2024|,ATATGTATATGTATATATATATGTATG|upstream_gene_variant|MODIFIER|EPlOSAG00000020758|EPlOSAG00000020758|transcript|EPlOSAT00000022146|lincRNA||n.-2884_-2883insTATGTATATGTATATATATATGTATG|||||2883|,ATATGTATATGTATATATATATGTATG|i…
chr01	18525360	T	TAGTCTAGCAAGGCATGTGCTACCAATCGTATATGGTGTGACAGTTTAATTTACAACGTTAATTAGTTGAATTAGTTTTGTCTGTGTGGTCAAAAGGTTTATATATATATATTATGAATTGTAA	32080	0/0	1|1	0/0	0/0	1|1	1|1	0/0	0/0	0/0	1|1	1|1	0/0	0/0	1|1	0/0	1|1	0/0	0/0	0/0	0/0	0/0	1|1	0/0	0/0	TAGTCTAGCAAGGCATGTGCTACCAATCGTATATGGTGTGACAGTTTAATTTACAACGTTAATTAGTTGAATTAGTTTTGTCTGTGTGGTCAAAAGGTTTATATATATATATTATGAATTGTAA|upstream_gene_variant|MODIFIER|OS01G0520500|OS01G0520500|transcript|OS01T0520500-01|protein_coding||c.-5064_-5063insAGTCTAGCAAGGCATGTGCTACCAATCGTATATGGTGTGACAGTTTAATTTACAACGTTAATTAGTTGAATTAGTTTTGTCTGTGTGGTCAAAAGGTTTATATATATATATTATGAATTGTAA|||||4972|,TAGTCTAGCAAGGCATGTGCTACC…
chr01	18533038	G	GTAAAAACCATATGGATGTTCACTACACT	21054	0/0	1/1	0/0	0/0	1/1	1/1	0/0	0/0	0/0	1/1	1/1	0/0	0/0	1/1	0/0	1/1	0/0	0/0	0/0	0/0	0/0	1/1	0/0	0/0	GTAAAAACCATATGGATGTTCACTACACT|upstream_gene_variant|MODIFIER|OS01G0520340|OS01G0520340|transcript|OS01T0520340-01|protein_coding||c.-2374_-2373insAGTGTAGTGAACATCCATATGGTTTTTA|||||1257|,GTAAAAACCATATGGATGTTCACTACACT|upstream_gene_variant|MODIFIER|EPlOSAG00000026022|EPlOSAG00000026022|transcript|EPlOSAT00000027410|lincRNA||n.-3508_-3507insAGTGTAGTGAACATCCATATGGTTTTTA|||||3508|,GTAAAAACCATATGGATGTTC…
chr01	18540864	TTTTTTTGCGAGGAAGTAGGGAGAGGTATTTG	T	1053.49	0/0	./.	0/0	0/0	./.	./.	0/0	0/0	0/0	1|1	./.	0/0	0/0	./.	0/0	./.	0/0	0/0	0/0	0/0	0/0	./.	0/0	0/0	T|upstream_gene_variant|MODIFIER|OS01G0520600|OS01G0520600|transcript|OS01T0520600-01|protein_coding||c.-646_-616delCAAATACCTCTCCCTACTTCCTCGCAAAAAA|||||127|,T|intergenic_region|MODIFIER|OS01G0520600-EPlOSAG00000014183|OS01G0520600-EPlOSAG00000014183|intergenic_region|OS01G0520600-EPlOSAG00000014183|||n.18540865_18540895delTTTTTTGCGAGGAAGTAGGGAGAGGTATTTG||||||
chr01	18625919	T	TTTATATATATATCAAGAACCGAGAA	2966.24	0/0	./.	0/0	0/0	1/1	./.	0/0	0/0	0/0	./.	1/1	0/0	0/0	1/1	0/0	./.	0/0	0/0	0/0	0/0	0/0	./.	0/0	0/0	TTTATATATATATCAAGAACCGAGAA|upstream_gene_variant|MODIFIER|OS01G0522100|OS01G0522100|transcript|OS01T0522100-01|protein_coding||c.-253_-252insTTATATATATATCAAGAACCGAGAA|||||201|,TTTATATATATATCAAGAACCGAGAA|downstream_gene_variant|MODIFIER|EPlOSAG00000012508|EPlOSAG00000012508|transcript|EPlOSAT00000013896|lincRNA||n.*821_*822insTTATATATATATCAAGAACCGAGAA|||||822|,TTTATATATATATCAAGAACCGAGAA|downstream…
chr01	18634077	AGATACTAGAAGTAGATAATGTGATTATCCCATTAG	A	14594.9	0/0	1/1	0/0	0/0	1/1	1/1	0/0	0/0	0/0	1/1	1/1	0/0	0/0	1/1	0/0	1/1	0/0	0/0	0/0	0/0	0/0	1/1	0/0	0/0	A|intergenic_region|MODIFIER|EPlOSAG00000021526-OS01G0522400|EPlOSAG00000021526-OS01G0522400|intergenic_region|EPlOSAG00000021526-OS01G0522400|||n.18634078_18634112delGATACTAGAAGTAGATAATGTGATTATCCCATTAG||||||
chr01	18638965	TTTGGCAATGTCAAAATTTTGGC	T	16082.9	0/0	1|1	0/0	0/0	1|1	1|1	0/0	0/0	0/0	1|1	1|1	0/0	0/0	1|1	0/0	1|1	0/0	0/0	0/0	0/0	0/0	1|1	0/0	0/0	T|upstream_gene_variant|MODIFIER|OS01G0522400|OS01G0522400|transcript|OS01T0522400-00|protein_coding||c.-267_-246delTTGGCAATGTCAAAATTTTGGC|||||267|,T|intergenic_region|MODIFIER|EPlOSAG00000021526-OS01G0522400|EPlOSAG00000021526-OS01G0522400|intergenic_region|EPlOSAG00000021526-OS01G0522400|||n.18638966_18638987delTTGGCAATGTCAAAATTTTGGC||||||
chr01	18655269	T	TAGTACCAACCGGGACTAAAG	867.1	0/0	0/0	0/0	0/0	0/0	0/0	1/1	0/0	0/0	0/0	0/0	0/0	0/0	0/0	0/0	0/0	0/0	0/0	0/0	0/0	0/0	0/0	0/0	0/0	TAGTACCAACCGGGACTAAAG|upstream_gene_variant|MODIFIER|EPlOSAG00000021657|EPlOSAG00000021657|transcript|EPlOSAT00000023045|lincRNA||n.-607_-606insAGTACCAACCGGGACTAAAG|||||606|,TAGTACCAACCGGGACTAAAG|upstream_gene_variant|MODIFIER|OS01G0522800|OS01G0522800|transcript|OS01T0522800-00|protein_coding||c.-3825_-3824insAGTACCAACCGGGACTAAAG|||||3824|,TAGTACCAACCGGGACTAAAG|downstream_gene_variant|MODIFIER|E…
chr01	18674234	GGCTTGACCCTGCACTTACATGCTGAGATGACCTTGCCTGAAAAAATATCAGAAATCATTGACCCAGCACTGTTGCACGTGGAACAGTATGACACCGATGCAGAGATACTAACTT	G	630.06	0/0	0/0	0/0	0/0	0/0	0/0	1/1	0/0	0/0	0/0	0/0	0/0	0/0	0/0	0/0	0/0	0/0	0/0	0/0	0/0	0/0	0/0	0/0	0/0	G|gene_fusion|HIGH|EPlOSAG00000004559&OS01G0523100|EPlOSAG00000004559&OS01G0523100|gene_variant|OS01G0523100|||n.18674235_18674348del||||||,G|bidirectional_gene_fusion|HIGH|EPlOSAG00000004559&OS01G0523250|EPlOSAG00000004559&OS01G0523250|gene_variant|OS01G0523250|||n.18674348_18674235del||||||
chr01	18752614	GAACATGTATACAAAAGTTAT	G	1862.06	0/0	0/0	0/0	0/0	0/0	0/0	1/1	0/0	0/0	0/0	0/0	0/0	0/0	0/0	0/0	0/0	0/0	0/0	0/0	0/0	0/0	0/0	0/0	0/0	G|upstream_gene_variant|MODIFIER|OS01G0524500|OS01G0524500|transcript|OS01T0524500-01|protein_coding||c.-3215_-3196delAACATGTATACAAAAGTTAT|||||2688|,G|downstream_gene_variant|MODIFIER|OS01G0524400|OS01G0524400|transcript|OS01T0524400-01|protein_coding||c.*2524_*2543delAACATGTATACAAAAGTTAT|||||2135|,G|intergenic_region|MODIFIER|OS01G0524400-OS01G0524500|OS01G0524400-OS01G0524500|intergenic_region|…
chr01	18782681	TTTGGCCATCTAGATGGCTTGGCCATCCAGATGGC	T	730.06	0/0	0/0	0/0	0/0	0/0	0/0	1|1	0/0	0/0	0/0	0/0	0/0	0/0	0/0	0/0	0/0	0/0	0/0	0/0	0/0	0/0	0/0	0/0	0/0	T|upstream_gene_variant|MODIFIER|EPlOSAG00000047596|EPlOSAG00000047596|transcript|EPlOSAT00000048984|lincRNA||n.-1514_-1481delTTGGCCATCTAGATGGCTTGGCCATCCAGATGGC|||||1514|,T|downstream_gene_variant|MODIFIER|OS01G0525100|OS01G0525100|transcript|OS01T0525100-01|protein_coding||c.*1562_*1595delTTGGCCATCTAGATGGCTTGGCCATCCAGATGGC|||||1290|,T|downstream_gene_variant|MODIFIER|EPlOSAG00000046910|EPlOSAG00…
chr01	18783486	CCCGCCGCCCCCCGTCGTCGCCCCAGCCGGATCCGTCGGCGGCAGCACCGGATCGGTCGCCCCAACCGCCCGCCGTCTCGT	C	533.36	0/0	0/0	0/0	0/0	0/0	0/0	1|1	0/0	0/0	0/0	0/0	0/0	0/0	0/0	0/0	0/0	0/0	0/0	0/0	0/0	./.	0/0	0/0	0/0	C|upstream_gene_variant|MODIFIER|EPlOSAG00000047596|EPlOSAG00000047596|transcript|EPlOSAT00000048984|lincRNA||n.-709_-630delCCGCCGCCCCCCGTCGTCGCCCCAGCCGGATCCGTCGGCGGCAGCACCGGATCGGTCGCCCCAACCGCCCGCCGTCTCGT|||||709|,C|downstream_gene_variant|MODIFIER|OS01G0525100|OS01G0525100|transcript|OS01T0525100-01|protein_coding||c.*2367_*2446delCCGCCGCCCCCCGTCGTCGCCCCAGCCGGATCCGTCGGCGGCAGCACCGGATCGGTCGCCCCAAC…
chr01	18783904	AGCCGCTCCCTATGGCGGTGGATCCGGCCCTCCCGAGGGCGGTGCCGCCGGATCCGCCACCCGCGCCGACGCCATTGCCATCCGCCGCCCG	A	571.93	0/0	0/0	0/0	./.	0/0	0/0	1/1	0/0	0/0	0/0	0/0	0/0	0/0	0/0	0/0	0/0	0/0	0/0	0/0	0/0	0/0	0/0	0/0	0/0	A|upstream_gene_variant|MODIFIER|EPlOSAG00000047596|EPlOSAG00000047596|transcript|EPlOSAT00000048984|lincRNA||n.-291_-202delGCCGCTCCCTATGGCGGTGGATCCGGCCCTCCCGAGGGCGGTGCCGCCGGATCCGCCACCCGCGCCGACGCCATTGCCATCCGCCGCCCG|||||291|,A|downstream_gene_variant|MODIFIER|OS01G0525100|OS01G0525100|transcript|OS01T0525100-01|protein_coding||c.*2785_*2874delGCCGCTCCCTATGGCGGTGGATCCGGCCCTCCCGAGGGCGGTGCCGCCGGATCCG…
chr01	18789222	T	TCTTCCCCTCTCCTCCCTCTCCCCTCCCCTCCC	554.1	0/0	0/0	0/0	0/0	0/0	0/0	1/1	0/0	0/0	0/0	0/0	0/0	0/0	0/0	0/0	0/0	0/0	0/0	0/0	0/0	0/0	0/0	0/0	0/0	TCTTCCCCTCTCCTCCCTCTCCCCTCCCCTCCC|upstream_gene_variant|MODIFIER|EPlOSAG00000046910|EPlOSAG00000046910|transcript|EPlOSAT00000048298|lincRNA||n.-4972_-4971insGGGAGGGGAGGGGAGAGGGAGGAGAGGGGAAG|||||4972|,TCTTCCCCTCTCCTCCCTCTCCCCTCCCCTCCC|upstream_gene_variant|MODIFIER|EPlOSAG00000047572|EPlOSAG00000047572|transcript|EPlOSAT00000048960|lincRNA||n.-4908_-4907insGGGAGGGGAGGGGAGAGGGAGGAGAGGGGAAG|||||490…
chr01	18815730	ACACTACTATAAGAAGCAAGCACAGTGT	A	1633.06	0/0	0/0	0/0	0/0	0/0	0/0	1/1	0/0	0/0	0/0	0/0	0/0	0/0	0/0	0/0	0/0	0/0	0/0	0/0	0/0	0/0	0/0	0/0	0/0	A|upstream_gene_variant|MODIFIER|OS01G0525350|OS01G0525350|transcript|OS01T0525350-00|protein_coding||c.-2842_-2816delCACTACTATAAGAAGCAAGCACAGTGT|||||2540|,A|intergenic_region|MODIFIER|EPlOSAG00000018191-OS01G0525350|EPlOSAG00000018191-OS01G0525350|intergenic_region|EPlOSAG00000018191-OS01G0525350|||n.18815731_18815757delCACTACTATAAGAAGCAAGCACAGTGT||||||
chr01	19210370	G	GAGTATAGGAATGTTGTACTA	195.44	0/0	0/0	0/0	0/0	0/0	0/0	1/1	0/0	0/0	0/0	0/0	0/0	0/0	0/0	0/0	0/0	0/0	0/0	0/0	0/0	0/0	0/0	0/0	0/0	GAGTATAGGAATGTTGTACTA|intergenic_region|MODIFIER|EPlOSAG00000030491-EPlOSAG00000020178|EPlOSAG00000030491-EPlOSAG00000020178|intergenic_region|EPlOSAG00000030491-EPlOSAG00000020178|||n.19210370_19210371insAGTATAGGAATGTTGTACTA||||||
chr01	19329721	AATATATATATATATATATATATATATATATAT	A	380.85	./.	0/0	0/0	0/0	0/0	0/0	1/1	0/0	0/0	0/0	0/0	0/0	0/0	0/0	0/0	0/0	0/0	0/0	./.	0/0	./.	0/0	0/0	./.	A|upstream_gene_variant|MODIFIER|OS01G0533800|OS01G0533800|transcript|OS01T0533800-00|protein_coding||c.-3840_-3809delATATATATATATATATATATATATATATATAT|||||3785|,A|upstream_gene_variant|MODIFIER|EPlOSAG00000040524|EPlOSAG00000040524|transcript|EPlOSAT00000041912|lincRNA||n.-1204_-1173delATATATATATATATATATATATATATATATAT|||||1173|,A|upstream_gene_variant|MODIFIER|EPlOSAG00000009293|EPlOSAG0000000929…
chr01	19366305	C	CACCGGCAACCGCTTAATTAT	623.1	0/0	0/0	0/0	0/0	0/0	0/0	1/1	0/0	0/0	0/0	0/0	0/0	0/0	0/0	0/0	0/0	0/0	0/0	0/0	0/0	0/0	0/0	0/0	0/0	CACCGGCAACCGCTTAATTAT|upstream_gene_variant|MODIFIER|EPlOSAG00000007187|EPlOSAG00000007187|transcript|EPlOSAT00000008575|lincRNA||n.-2426_-2425insACCGGCAACCGCTTAATTAT|||||2425|,CACCGGCAACCGCTTAATTAT|downstream_gene_variant|MODIFIER|EPlOSAG00000052167|EPlOSAG00000052167|transcript|EPlOSAT00000000733|lincRNA||n.*2032_*2033insATAATTAAGCGGTTGCCGGT|||||2032|,CACCGGCAACCGCTTAATTAT|downstream_gene_varia…
chr01	19376208	C	CGGCGCGGCGGAGAGGAGCGGCGGCCTCGCGCACGGGCAGGGA	933.11	0/0	0/0	0/0	0/0	0/0	0/0	1/1	0/0	0/0	0/0	0/0	0/0	0/0	0/0	0/0	0/0	0/0	0/0	0/0	0/0	0/0	0/0	0/0	0/0	CGGCGCGGCGGAGAGGAGCGGCGGCCTCGCGCACGGGCAGGGA|upstream_gene_variant|MODIFIER|OS01G0534700|OS01G0534700|transcript|OS01T0534700-00|protein_coding||c.-4945_-4944insGGCGCGGCGGAGAGGAGCGGCGGCCTCGCGCACGGGCAGGGA|||||4944|,CGGCGCGGCGGAGAGGAGCGGCGGCCTCGCGCACGGGCAGGGA|intergenic_region|MODIFIER|EPlOSAG00000023708-OS01G0534700|EPlOSAG00000023708-OS01G0534700|intergenic_region|EPlOSAG00000023708-OS01G0534700||…
chr01	19381655	A	ACAAAAAGACATATTATATGTATCAG	1085.1	0/0	0/0	0/0	0/0	0/0	0/0	1/1	0/0	0/0	0/0	0/0	0/0	0/0	0/0	0/0	0/0	0/0	0/0	0/0	0/0	0/0	0/0	0/0	0/0	ACAAAAAGACATATTATATGTATCAG|intron_variant|MODIFIER|OS01G0534700|OS01G0534700|transcript|OS01T0534700-00|protein_coding|1/9|c.73-255_73-254insCAAAAAGACATATTATATGTATCAG||||||
chr01	19390498	T	TCTTGGCCACTTCGAGAGAAAAC	1541.1	0/0	0/0	0/0	0/0	0/0	0/0	1/1	0/0	0/0	0/0	0/0	0/0	0/0	0/0	0/0	0/0	0/0	0/0	0/0	0/0	0/0	0/0	0/0	0/0	TCTTGGCCACTTCGAGAGAAAAC|downstream_gene_variant|MODIFIER|OS01G0534700|OS01G0534700|transcript|OS01T0534700-00|protein_coding||c.*3300_*3301insCTTGGCCACTTCGAGAGAAAAC|||||3301|,TCTTGGCCACTTCGAGAGAAAAC|downstream_gene_variant|MODIFIER|OS01G0534900|OS01G0534900|transcript|OS01T0534900-01|protein_coding||c.*4179_*4180insGTTTTCTCTCGAAGTGGCCAAG|||||4043|,TCTTGGCCACTTCGAGAGAAAAC|intron_variant|MODIFIER|O…
chr01	19506726	C	CTCTCTCCGTTTGATATTATAAGATGCTTTGACTTTTTCCTACTT	37647.6	1/1	1/1	0/0	0/0	1/1	1/1	1/1	1/1	0/0	1/1	1/1	0/0	1/1	0/0	1/1	1/1	0/0	1/1	0/0	0/0	0/0	1/1	0/0	0/0	CTCTCTCCGTTTGATATTATAAGATGCTTTGACTTTTTCCTACTT|upstream_gene_variant|MODIFIER|OS01G0536433|OS01G0536433|transcript|OS01T0536433-00|protein_coding||c.-1155_-1154insTCTCTCCGTTTGATATTATAAGATGCTTTGACTTTTTCCTACTT|||||715|,CTCTCTCCGTTTGATATTATAAGATGCTTTGACTTTTTCCTACTT|downstream_gene_variant|MODIFIER|EPlOSAG00000017809|EPlOSAG00000017809|transcript|EPlOSAT00000019197|lincRNA||n.*1601_*1602insAAGTAGGAAAA…
chr01	19597676	TTATTCCTTTCTCTTTGTCAAATTTTATGA	T	1143.06	0/0	0/0	0/0	0/0	0/0	0/0	1/1	0/0	0/0	0/0	0/0	0/0	0/0	0/0	0/0	0/0	0/0	0/0	0/0	0/0	0/0	0/0	0/0	0/0	T|intergenic_region|MODIFIER|EPlOSAG00000017979-EPlOSAG00000014182|EPlOSAG00000017979-EPlOSAG00000014182|intergenic_region|EPlOSAG00000017979-EPlOSAG00000014182|||n.19597677_19597705delTATTCCTTTCTCTTTGTCAAATTTTATGA||||||
chr01	20091380	TGCTGCAGACCAAAGTCCCATA	T	12033.9	1/1	0/0	0/0	0/0	0/0	0/0	0/0	1/1	0/0	0/0	0/0	0/0	1/1	0/0	1/1	0/0	0/0	1/1	0/0	0/0	0/0	0/0	0/0	0/0	T|upstream_gene_variant|MODIFIER|EPlOSAG00000009684|EPlOSAG00000009684|transcript|EPlOSAT00000011072|lincRNA||n.-2187_-2167delGCTGCAGACCAAAGTCCCATA|||||2187|,T|downstream_gene_variant|MODIFIER|EPlOSAG00000009727|EPlOSAG00000009727|transcript|EPlOSAT00000011115|lincRNA||n.*2171_*2191delTATGGGACTTTGGTCTGCAGC|||||2191|,T|intergenic_region|MODIFIER|EPlOSAG00000047342-EPlOSAG00000009684|EPlOSAG0000004…
chr01	20622273	T	TGGCGGCGGGGCGGCGCAGGGCGTCC	2961.39	0/0	0/0	0/0	0/0	./.	0/0	1/1	0/0	0/0	0/0	0/0	0/0	1/1	0/0	0/0	0/0	0/0	0/0	0/0	0/0	0/0	0/0	0/0	1/1	TGGCGGCGGGGCGGCGCAGGGCGTCC|upstream_gene_variant|MODIFIER|EPlOSAG00000005316|EPlOSAG00000005316|transcript|EPlOSAT00000006704|lincRNA||n.-416_-415insGGACGCCCTGCGCCGCCCCGCCGCC|||||416|,TGGCGGCGGGGCGGCGCAGGGCGTCC|downstream_gene_variant|MODIFIER|EPlOSAG00000047851|EPlOSAG00000047851|transcript|EPlOSAT00000049239|lincRNA||n.*1295_*1296insGGCGGCGGGGCGGCGCAGGGCGTCC|||||1296|,TGGCGGCGGGGCGGCGCAGGGCGTCC…
chr01	21227337	ATATATATATATATATATATATATAT	A,*	1204.46	0/0	2/2	0/0	0/0	./.	2/2	1|1	0/0	0/0	./.	2/2	0/0	./.	0/0	./.	./.	0/0	0/0	./.	0/0	0/0	2/2	0/0	0/0	A|upstream_gene_variant|MODIFIER|OS01G0559600|OS01G0559600|transcript|OS01T0559600-01|protein_coding||c.-3164_-3140delTATATATATATATATATATATATAT|||||3055|,A|downstream_gene_variant|MODIFIER|EPlOSAG00000023918|EPlOSAG00000023918|transcript|EPlOSAT00000025306|lincRNA||n.*2473_*2497delTATATATATATATATATATATATAT|||||2473|,A|intergenic_region|MODIFIER|EPlOSAG00000023918-OS01G0559600|EPlOSAG00000023918-O…
chr01	21241185	C	CTCTTTTCATCTCTCGCACAGTAA	535.12	0/0	./.	0/0	0/0	0/0	./.	0/0	0/0	0/0	./.	0/0	0/0	0/0	0/0	0/0	0/0	0/0	0/0	0/0	0/0	0/0	1/1	0/0	0/0	CTCTTTTCATCTCTCGCACAGTAA|upstream_gene_variant|MODIFIER|EPlOSAG00000016646|EPlOSAG00000016646|transcript|EPlOSAT00000018034|lincRNA||n.-4182_-4181insTTACTGTGCGAGAGATGAAAAGA|||||4182|,CTCTTTTCATCTCTCGCACAGTAA|upstream_gene_variant|MODIFIER|OS01G0559750|OS01G0559750|transcript|OS01T0559750-01|protein_coding||c.-1417_-1416insTCTTTTCATCTCTCGCACAGTAA|||||1414|WARNING_TRANSCRIPT_NO_START_CODON,CTCTTTTC…
chr01	21263089	TTGTGCTTAAAGTATCATGGATAATAAAGTAAGTCACAAATAAAATAAATAATAATTTTAAAAAAATTTAAATAAGATGAGTGGTTAAATATTGCATGTAAAAACTCAAAAC	T	1166.09	0/0	0/0	0/0	0/0	0/0	0/0	1|1	0/0	0/0	0/0	0/0	0/0	0/0	0/0	0/0	0/0	0/0	0/0	0/0	0/0	0/0	0/0	0/0	0/0	T|upstream_gene_variant|MODIFIER|EPlOSAG00000026952|EPlOSAG00000026952|transcript|EPlOSAT00000028340|lincRNA||n.-1871_-1761del|||||1761|,T|upstream_gene_variant|MODIFIER|OS01G0559825|OS01G0559825|transcript|OS01T0559825-00|protein_coding||c.-1063_-953del|||||953|WARNING_TRANSCRIPT_NO_START_CODON,T|upstream_gene_variant|MODIFIER|EPlOSAG00000041252|EPlOSAG00000041252|transcript|EPlOSAT00000042640|l…
chr01	21278967	CAAAATTGAACACGAGATTTCAGTAAAAA	C	558.06	0/0	0/0	0/0	0/0	0/0	0/0	1/1	0/0	0/0	0/0	0/0	0/0	0/0	0/0	0/0	0/0	0/0	0/0	0/0	0/0	0/0	0/0	0/0	0/0	C|downstream_gene_variant|MODIFIER|OS01G0560200|OS01G0560200|transcript|OS01T0560200-01|protein_coding||c.*384_*411delAAAATTGAACACGAGATTTCAGTAAAAA|||||211|,C|intergenic_region|MODIFIER|OS01G0560200-EPlOSAG00000040253|OS01G0560200-EPlOSAG00000040253|intergenic_region|OS01G0560200-EPlOSAG00000040253|||n.21278968_21278995delAAAATTGAACACGAGATTTCAGTAAAAA||||||
chr01	21279918	T	TCGGTCATGTGGGCTACTCCAAGACGG	591.1	0/0	0/0	0/0	0/0	0/0	0/0	1|1	0/0	0/0	0/0	0/0	0/0	0/0	0/0	0/0	0/0	0/0	0/0	0/0	0/0	0/0	0/0	0/0	0/0	TCGGTCATGTGGGCTACTCCAAGACGG|downstream_gene_variant|MODIFIER|OS01G0560200|OS01G0560200|transcript|OS01T0560200-01|protein_coding||c.*1334_*1335insCGGTCATGTGGGCTACTCCAAGACGG|||||1162|,TCGGTCATGTGGGCTACTCCAAGACGG|intergenic_region|MODIFIER|OS01G0560200-EPlOSAG00000040253|OS01G0560200-EPlOSAG00000040253|intergenic_region|OS01G0560200-EPlOSAG00000040253|||n.21279918_21279919insCGGTCATGTGGGCTACTCCAAGA…
chr01	21282479	A	ATTTCGGCAATAATAAAAGGGG	355.11	0/0	0/0	0/0	0/0	0/0	0/0	1|1	0/0	0/0	0/0	0/0	0/0	0/0	0/0	0/0	0/0	0/0	0/0	0/0	0/0	0/0	0/0	0/0	0/0	ATTTCGGCAATAATAAAAGGGG|downstream_gene_variant|MODIFIER|OS01G0560200|OS01G0560200|transcript|OS01T0560200-01|protein_coding||c.*3895_*3896insTTTCGGCAATAATAAAAGGGG|||||3723|,ATTTCGGCAATAATAAAAGGGG|intergenic_region|MODIFIER|OS01G0560200-EPlOSAG00000040253|OS01G0560200-EPlOSAG00000040253|intergenic_region|OS01G0560200-EPlOSAG00000040253|||n.21282479_21282480insTTTCGGCAATAATAAAAGGGG||||||
chr01	21283184	CAATATGATATATAGATCACAGTAGCATTATATTGTTCAGCAGTTAATCA	C	1411.06	0/0	0/0	0/0	0/0	0/0	0/0	1|1	0/0	0/0	0/0	0/0	0/0	0/0	0/0	0/0	0/0	0/0	0/0	0/0	0/0	0/0	0/0	0/0	0/0	C|downstream_gene_variant|MODIFIER|OS01G0560200|OS01G0560200|transcript|OS01T0560200-01|protein_coding||c.*4601_*4649delAATATGATATATAGATCACAGTAGCATTATATTGTTCAGCAGTTAATCA|||||4428|,C|intergenic_region|MODIFIER|OS01G0560200-EPlOSAG00000040253|OS01G0560200-EPlOSAG00000040253|intergenic_region|OS01G0560200-EPlOSAG00000040253|||n.21283185_21283233delAATATGATATATAGATCACAGTAGCATTATATTGTTCAGCAGTTAATCA|||…
chr01	21285303	G	GCACCTAAAGTAAGAGCATCCGAACGAAGTTGT	331.13	0/0	0/0	0/0	0/0	0/0	0/0	1|1	0/0	0/0	0/0	0/0	0/0	0/0	0/0	0/0	0/0	0/0	0/0	0/0	0/0	0/0	0/0	0/0	0/0	GCACCTAAAGTAAGAGCATCCGAACGAAGTTGT|intergenic_region|MODIFIER|OS01G0560200-EPlOSAG00000040253|OS01G0560200-EPlOSAG00000040253|intergenic_region|OS01G0560200-EPlOSAG00000040253|||n.21285303_21285304insCACCTAAAGTAAGAGCATCCGAACGAAGTTGT||||||
chr01	21349680	G	GTTAGTTCCTGAAATTATGGAGAAGTTTAGGAAAAGTTAGTAGTTTGAAAAAAAAGTTGAGAGTTTATATGTGTAGAAAAGTTTTGGATATGACTGATAGA	1724.1	0/0	0/0	0/0	0/0	0/0	0/0	1|1	0/0	0/0	0/0	0/0	0/0	0/0	0/0	0/0	0/0	0/0	0/0	0/0	0/0	0/0	0/0	0/0	0/0	GTTAGTTCCTGAAATTATGGAGAAGTTTAGGAAAAGTTAGTAGTTTGAAAAAAAAGTTGAGAGTTTATATGTGTAGAAAAGTTTTGGATATGACTGATAGA|downstream_gene_variant|MODIFIER|OS01G0561800|OS01G0561800|transcript|OS01T0561800-00|lincRNA||n.*426_*427insTTAGTTCCTGAAATTATGGAGAAGTTTAGGAAAAGTTAGTAGTTTGAAAAAAAAGTTGAGAGTTTATATGTGTAGAAAAGTTTTGGATATGACTGATAGA|||||427|,GTTAGTTCCTGAAATTATGGAGAAGTTTAGGAAAAGTTAGTAGTTTGAAAAAAAAGTTGAGAGTTTATATGTGTAGAA…
chr01	21350462	G	GATAGGGGTACTCGAGGTCCCC	1359.1	0/0	0/0	0/0	0/0	0/0	0/0	1|1	0/0	0/0	0/0	0/0	0/0	0/0	0/0	0/0	0/0	0/0	0/0	0/0	0/0	0/0	0/0	0/0	0/0	GATAGGGGTACTCGAGGTCCCC|downstream_gene_variant|MODIFIER|OS01G0561800|OS01G0561800|transcript|OS01T0561800-00|lincRNA||n.*1208_*1209insATAGGGGTACTCGAGGTCCCC|||||1209|,GATAGGGGTACTCGAGGTCCCC|intergenic_region|MODIFIER|OS01G0561800-EPlOSAG00000050552|OS01G0561800-EPlOSAG00000050552|intergenic_region|OS01G0561800-EPlOSAG00000050552|||n.21350462_21350463insATAGGGGTACTCGAGGTCCCC||||||
chr01	21380505	A	AACACAAACGTTGCCTCCACCGAAGCTTCCAACG	924.1	0/0	0/0	0/0	0/0	0/0	0/0	1|1	0/0	0/0	0/0	0/0	0/0	0/0	0/0	0/0	0/0	0/0	0/0	0/0	0/0	0/0	0/0	0/0	0/0	AACACAAACGTTGCCTCCACCGAAGCTTCCAACG|upstream_gene_variant|MODIFIER|EPlOSAG00000021187|EPlOSAG00000021187|transcript|EPlOSAT00000022575|lincRNA||n.-49_-48insACACAAACGTTGCCTCCACCGAAGCTTCCAACG|||||48|,AACACAAACGTTGCCTCCACCGAAGCTTCCAACG|upstream_gene_variant|MODIFIER|EPlOSAG00000034512|EPlOSAG00000034512|transcript|EPlOSAT00000035900|lincRNA||n.-1073_-1072insACACAAACGTTGCCTCCACCGAAGCTTCCAACG|||||1072|…
chr01	21381957	GGCGGCTCGCAGGAGCAGCTCAGCA	G	759.06	0/0	0/0	0/0	0/0	0/0	0/0	1|1	0/0	0/0	0/0	0/0	0/0	0/0	0/0	0/0	0/0	0/0	0/0	0/0	0/0	0/0	0/0	0/0	0/0	G|5_prime_UTR_variant|MODIFIER|OS01G0562400|OS01G0562400|transcript|OS01T0562400-01|protein_coding|1/12|c.-99_-76delTCGCAGGAGCAGCTCAGCAGCGGC|||||76|WARNING_TRANSCRIPT_NO_START_CODON&INFO_REALIGN_3_PRIME,G|upstream_gene_variant|MODIFIER|EPlOSAG00000033953|EPlOSAG00000033953|transcript|EPlOSAT00000035341|lincRNA||n.-265_-242delTGCTGAGCTGCTCCTGCGAGCCGC|||||242|,G|downstream_gene_variant|MODIFIER|EPl…
chr01	21389922	G	GTTTTTTTATTTTATAGCACCGAAAGATACTAGTTCA	691.1	0/0	0/0	0/0	0/0	0/0	0/0	1|1	0/0	0/0	0/0	0/0	0/0	0/0	0/0	0/0	0/0	0/0	0/0	0/0	0/0	0/0	0/0	0/0	0/0	GTTTTTTTATTTTATAGCACCGAAAGATACTAGTTCA|upstream_gene_variant|MODIFIER|OS01G0562525|OS01G0562525|transcript|OS01T0562525-00|lincRNA||n.-1118_-1117insTTTTTTTATTTTATAGCACCGAAAGATACTAGTTCA|||||1117|,GTTTTTTTATTTTATAGCACCGAAAGATACTAGTTCA|downstream_gene_variant|MODIFIER|OS01G0562400|OS01G0562400|transcript|OS01T0562400-01|protein_coding||c.*405_*406insTTTTTTTATTTTATAGCACCGAAAGATACTAGTTCA|||||281|WARNIN…
chr01	21409521	G	GCTGGAGGGCTCGTCACCCACCAAGAAACATAGCAA	30731.3	1/1	1/1	0/0	0/0	1/1	1/1	./.	0/0	0/0	1/1	1/1	0/0	1/1	0/0	1/1	1/1	0/0	1/1	0/0	0/0	1/1	1/1	0/0	1/1	GCTGGAGGGCTCGTCACCCACCAAGAAACATAGCAA|upstream_gene_variant|MODIFIER|EPlOSAG00000001037|EPlOSAG00000001037|transcript|EPlOSAT00000002425|lincRNA||n.-2248_-2247insTTGCTATGTTTCTTGGTGGGTGACGAGCCCTCCAG|||||2248|,GCTGGAGGGCTCGTCACCCACCAAGAAACATAGCAA|downstream_gene_variant|MODIFIER|EPlOSAG00000001003|EPlOSAG00000001003|transcript|EPlOSAT00000002391|lincRNA||n.*2247_*2248insCTGGAGGGCTCGTCACCCACCAAGAAACA…
chr01	21577302	CACCGCTGGTGGGGAACCAGGTGTAGCCTTAACTCA	C	6595.1	0/0	0/0	0/0	0/0	0/0	0/0	./.	0/0	0/0	0/0	0/0	0/0	0/0	1|1	0/0	0/0	0/0	0/0	0/0	1|1	0/0	0/0	0/0	0/0	C|intergenic_region|MODIFIER|EPlOSAG00000034604-EPlOSAG00000051642|EPlOSAG00000034604-EPlOSAG00000051642|intergenic_region|EPlOSAG00000034604-EPlOSAG00000051642|||n.21577303_21577337delACCGCTGGTGGGGAACCAGGTGTAGCCTTAACTCA||||||
chr01	21623680	ATTCAATATCAGACATGAGCAGAACC	A	1276.06	0/0	0/0	0/0	0/0	0/0	0/0	1|1	0/0	0/0	0/0	0/0	0/0	0/0	0/0	0/0	0/0	0/0	0/0	0/0	0/0	0/0	0/0	0/0	0/0	A|upstream_gene_variant|MODIFIER|EPlOSAG00000006867|EPlOSAG00000006867|transcript|EPlOSAT00000008255|lincRNA||n.-3444_-3420delGGTTCTGCTCATGTCTGATATTGAA|||||3420|,A|upstream_gene_variant|MODIFIER|EPlOSAG00000030822|EPlOSAG00000030822|transcript|EPlOSAT00000032210|lincRNA||n.-2038_-2014delTTCAATATCAGACATGAGCAGAACC|||||2038|,A|downstream_gene_variant|MODIFIER|OS01G0565600|OS01G0565600|transcript|OS0…
chr01	21624306	TGTCAAAATACTGTATTTTTTGCCAGTTAATGC	T	1601.06	0/0	0/0	0/0	0/0	0/0	0/0	1|1	0/0	0/0	0/0	0/0	0/0	0/0	0/0	0/0	0/0	0/0	0/0	0/0	0/0	0/0	0/0	0/0	0/0	T|upstream_gene_variant|MODIFIER|EPlOSAG00000006867|EPlOSAG00000006867|transcript|EPlOSAT00000008255|lincRNA||n.-4077_-4046delGCATTAACTGGCAAAAAATACAGTATTTTGAC|||||4046|,T|upstream_gene_variant|MODIFIER|EPlOSAG00000030822|EPlOSAG00000030822|transcript|EPlOSAT00000032210|lincRNA||n.-1412_-1381delGTCAAAATACTGTATTTTTTGCCAGTTAATGC|||||1412|,T|downstream_gene_variant|MODIFIER|EPlOSAG00000026875|EPlOSAG…
chr01	21624492	G	GTTTCTACAAAACGTGTTGCCCATTGC	1411.1	0/0	0/0	0/0	0/0	0/0	0/0	1|1	0/0	0/0	0/0	0/0	0/0	0/0	0/0	0/0	0/0	0/0	0/0	0/0	0/0	0/0	0/0	0/0	0/0	GTTTCTACAAAACGTGTTGCCCATTGC|upstream_gene_variant|MODIFIER|EPlOSAG00000006867|EPlOSAG00000006867|transcript|EPlOSAT00000008255|lincRNA||n.-4232_-4231insGCAATGGGCAACACGTTTTGTAGAAA|||||4232|,GTTTCTACAAAACGTGTTGCCCATTGC|upstream_gene_variant|MODIFIER|EPlOSAG00000030822|EPlOSAG00000030822|transcript|EPlOSAT00000032210|lincRNA||n.-1227_-1226insTTTCTACAAAACGTGTTGCCCATTGC|||||1226|,GTTTCTACAAAACGTGTTGCC…
chr01	21630407	TCCAGGTTAGAATGAACAAAA	T	601.06	0/0	0/0	0/0	0/0	0/0	0/0	1|1	0/0	0/0	0/0	0/0	0/0	0/0	0/0	0/0	0/0	0/0	0/0	0/0	0/0	0/0	0/0	0/0	0/0	T|upstream_gene_variant|MODIFIER|OS01G0565600|OS01G0565600|transcript|OS01T0565600-03|protein_coding||c.-3913_-3894delTTTTGTTCATTCTAACCTGG|||||3894|WARNING_TRANSCRIPT_NO_START_CODON,T|upstream_gene_variant|MODIFIER|EPlOSAG00000026875|EPlOSAG00000026875|transcript|EPlOSAT00000028263|lincRNA||n.-4631_-4612delTTTTGTTCATTCTAACCTGG|||||4612|,T|upstream_gene_variant|MODIFIER|OS01G0565900|OS01G0565900|t…
chr01	21668183	T	TTGCGTGGATCGATTAAGATGTCGTCCC	1900.1	0/0	0/0	0/0	0/0	0/0	0/0	1|1	0/0	0/0	0/0	0/0	0/0	0/0	0/0	0/0	0/0	0/0	0/0	0/0	0/0	0/0	0/0	0/0	0/0	TTGCGTGGATCGATTAAGATGTCGTCCC|conservative_inframe_insertion|MODERATE|CCD8A|OS01G0566500|transcript|OS01T0566500-01|protein_coding|1/5|c.97_98insGGGACGACATCTTAATCGATCCACGCA|p.Ser32_Asn33insArgAspAspIleLeuIleAspProArg|121/1787|97/1659|33/552||,TTGCGTGGATCGATTAAGATGTCGTCCC|upstream_gene_variant|MODIFIER|EPlOSAG00000034353|EPlOSAG00000034353|transcript|EPlOSAT00000035741|lincRNA||n.-4918_-4917insTGCG…
chr01	21677494	ATGCTTTTACCACGAGTCCTTTTTGTCTTTTTGCAAACTTGTCGCACG	A	782.06	0/0	0/0	0/0	0/0	0/0	0/0	1|1	0/0	0/0	0/0	0/0	0/0	0/0	0/0	0/0	0/0	0/0	0/0	0/0	0/0	0/0	0/0	0/0	0/0	A|upstream_gene_variant|MODIFIER|EPlOSAG00000032933|EPlOSAG00000032933|transcript|EPlOSAT00000034321|lincRNA||n.-4282_-4236delCGTGCGACAAGTTTGCAAAAAGACAAAAAGGACTCGTGGTAAAAGCA|||||4236|,A|upstream_gene_variant|MODIFIER|EPlOSAG00000007145|EPlOSAG00000007145|transcript|EPlOSAT00000008533|lincRNA||n.-2596_-2550delTGCTTTTACCACGAGTCCTTTTTGTCTTTTTGCAAACTTGTCGCACG|||||2596|,A|downstream_gene_variant|MODIF…
chr01	21682278	TATATATAAGTACATTAAGAAAAGATGATACAAAATTAGAA	T	787.06	0/0	0/0	0/0	0/0	0/0	0/0	1/1	0/0	0/0	0/0	0/0	0/0	0/0	0/0	0/0	0/0	0/0	0/0	0/0	0/0	0/0	0/0	0/0	0/0	T|upstream_gene_variant|MODIFIER|EPlOSAG00000028808|EPlOSAG00000028808|transcript|EPlOSAT00000030196|lincRNA||n.-3564_-3525delATATATAAGTACATTAAGAAAAGATGATACAAAATTAGAA|||||3564|,T|upstream_gene_variant|MODIFIER|EPlOSAG00000046196|EPlOSAG00000046196|transcript|EPlOSAT00000047584|lincRNA||n.-3795_-3756delATATATAAGTACATTAAGAAAAGATGATACAAAATTAGAA|||||3795|,T|downstream_gene_variant|MODIFIER|EPlOSAG000…
chr01	21683031	CCGAGACTAAAGATCTATTTCTAGTCCCGGT	C	736.06	0/0	0/0	0/0	0/0	0/0	0/0	1|1	0/0	0/0	0/0	0/0	0/0	0/0	0/0	0/0	0/0	0/0	0/0	0/0	0/0	0/0	0/0	0/0	0/0	C|upstream_gene_variant|MODIFIER|EPlOSAG00000028808|EPlOSAG00000028808|transcript|EPlOSAT00000030196|lincRNA||n.-2811_-2782delCGAGACTAAAGATCTATTTCTAGTCCCGGT|||||2811|,C|upstream_gene_variant|MODIFIER|EPlOSAG00000046196|EPlOSAG00000046196|transcript|EPlOSAT00000047584|lincRNA||n.-3042_-3013delCGAGACTAAAGATCTATTTCTAGTCCCGGT|||||3042|,C|downstream_gene_variant|MODIFIER|EPlOSAG00000007145|EPlOSAG0000…
chr01	21683468	TTTGATCTATGTTGAATGTGTGA	T	331.09	0/0	0/0	0/0	0/0	0/0	0/0	1|1	0/0	0/0	0/0	0/0	0/0	0/0	0/0	0/0	0/0	0/0	0/0	0/0	0/0	0/0	0/0	0/0	0/0	T|upstream_gene_variant|MODIFIER|EPlOSAG00000009193|EPlOSAG00000009193|transcript|EPlOSAT00000010581|lincRNA||n.-261_-240delTCACACATTCAACATAGATCAA|||||240|,T|upstream_gene_variant|MODIFIER|EPlOSAG00000028808|EPlOSAG00000028808|transcript|EPlOSAT00000030196|lincRNA||n.-2374_-2353delTTGATCTATGTTGAATGTGTGA|||||2374|,T|upstream_gene_variant|MODIFIER|EPlOSAG00000046196|EPlOSAG00000046196|transcript|EP…
chr01	21686076	A	ACATATGTAGTGGAAATCTGAAAAACTAACATTGGATTGAAAAATGAC	2442.1	0/0	0/0	0/0	0/0	0/0	0/0	1|1	0/0	0/0	0/0	0/0	0/0	0/0	0/0	0/0	0/0	0/0	0/0	0/0	0/0	0/0	0/0	0/0	0/0	ACATATGTAGTGGAAATCTGAAAAACTAACATTGGATTGAAAAATGAC|upstream_gene_variant|MODIFIER|EPlOSAG00000009193|EPlOSAG00000009193|transcript|EPlOSAT00000010581|lincRNA||n.-2848_-2847insGTCATTTTTCAATCCAATGTTAGTTTTTCAGATTTCCACTACATATG|||||2848|,ACATATGTAGTGGAAATCTGAAAAACTAACATTGGATTGAAAAATGAC|upstream_gene_variant|MODIFIER|EPlOSAG00000009268|EPlOSAG00000009268|transcript|EPlOSAT00000010656|lincRNA||n.-3542_-35…
chr01	21707985	AGTAGAGCCGCTGCCGGTGCTCTTCCTTGCCAACGAG	A	1268.06	0/0	0/0	0/0	0/0	0/0	0/0	1|1	0/0	0/0	0/0	0/0	0/0	0/0	0/0	0/0	0/0	0/0	0/0	0/0	0/0	0/0	0/0	0/0	0/0	A|upstream_gene_variant|MODIFIER|OS01G0566900|OS01G0566900|transcript|OS01T0566900-01|protein_coding||c.-3904_-3869delCTCGTTGGCAAGGAAGAGCACCGGCAGCGGCTCTAC|||||3804|WARNING_TRANSCRIPT_NO_START_CODON,A|upstream_gene_variant|MODIFIER|EPlOSAG00000046784|EPlOSAG00000046784|transcript|EPlOSAT00000048172|lincRNA||n.-3944_-3909delCTCGTTGGCAAGGAAGAGCACCGGCAGCGGCTCTAC|||||3909|,A|upstream_gene_variant|MODI…
chr01	21709358	A	ACTTTAGGATCACAAGTTAAACC	1406.1	0/0	0/0	0/0	0/0	0/0	0/0	1|1	0/0	0/0	0/0	0/0	0/0	0/0	0/0	0/0	0/0	0/0	0/0	0/0	0/0	0/0	0/0	0/0	0/0	ACTTTAGGATCACAAGTTAAACC|upstream_gene_variant|MODIFIER|EPlOSAG00000013287|EPlOSAG00000013287|transcript|EPlOSAT00000014675|lincRNA||n.-2772_-2771insCTTTAGGATCACAAGTTAAACC|||||2771|,ACTTTAGGATCACAAGTTAAACC|upstream_gene_variant|MODIFIER|OS01G0567200|OS01G0567200|transcript|OS01T0567200-01|protein_coding||c.-4605_-4604insCTTTAGGATCACAAGTTAAACC|||||4373|,ACTTTAGGATCACAAGTTAAACC|downstream_gene_varia…
chr01	21711941	C	CATTTTGGAATATTGCTTATCAT	934.1	0/0	0/0	0/0	0/0	0/0	0/0	1/1	0/0	0/0	0/0	0/0	0/0	0/0	0/0	0/0	0/0	0/0	0/0	0/0	0/0	0/0	0/0	0/0	0/0	CATTTTGGAATATTGCTTATCAT|upstream_gene_variant|MODIFIER|EPlOSAG00000013287|EPlOSAG00000013287|transcript|EPlOSAT00000014675|lincRNA||n.-189_-188insATTTTGGAATATTGCTTATCAT|||||188|,CATTTTGGAATATTGCTTATCAT|upstream_gene_variant|MODIFIER|OS01G0567200|OS01G0567200|transcript|OS01T0567200-01|protein_coding||c.-2022_-2021insATTTTGGAATATTGCTTATCAT|||||1790|,CATTTTGGAATATTGCTTATCAT|downstream_gene_variant|…
chr01	21716051	A	ATGATCGATCGATCATGAATC	241.06	0/0	0/0	0/0	0/0	0/0	0/0	1|1	0/0	0/0	0/0	0/0	0/0	0/0	0/0	0/0	0/0	0/0	0/0	0/0	0/0	0/0	0/0	0/0	0/0	ATGATCGATCGATCATGAATC|upstream_gene_variant|MODIFIER|OS01G0567500|OS01G0567500|transcript|OS01T0567500-01|protein_coding||c.-3895_-3894insTGATCGATCGATCATGAATC|||||3809|,ATGATCGATCGATCATGAATC|upstream_gene_variant|MODIFIER|EPlOSAG00000024469|EPlOSAG00000024469|transcript|EPlOSAT00000025857|lincRNA||n.-4744_-4743insTGATCGATCGATCATGAATC|||||4743|,ATGATCGATCGATCATGAATC|downstream_gene_variant|MODIFIE…
chr01	21728213	TCTCTTGCACGGCTTTTGTTTCCTCATCTATTCTCATGTAACGAACGTTTATTGGAAAAAG	T	862.06	0/0	0/0	0/0	0/0	0/0	0/0	1|1	0/0	0/0	0/0	0/0	0/0	0/0	0/0	0/0	0/0	0/0	0/0	0/0	0/0	0/0	0/0	0/0	0/0	T|upstream_gene_variant|MODIFIER|OS01G0567600|OS01G0567600|transcript|OS01T0567600-00|protein_coding||c.-2410_-2351delCTTTTTCCAATAAACGTTCGTTACATGAGAATAGATGAGGAAACAAAAGCCGTGCAAGAG|||||2351|,T|upstream_gene_variant|MODIFIER|EPlOSAG00000024601|EPlOSAG00000024601|transcript|EPlOSAT00000025989|lincRNA||n.-3094_-3035delCTTTTTCCAATAAACGTTCGTTACATGAGAATAGATGAGGAAACAAAAGCCGTGCAAGAG|||||3035|,T|downstream_…
chr01	21731814	GAGTCTTTGTCCTACGTGGTGCTTACGTGGCATTAGAATAAAAACAAAAATAAAAAAA	G	1092.06	0/0	0/0	0/0	0/0	0/0	0/0	1|1	0/0	0/0	0/0	0/0	0/0	0/0	0/0	0/0	0/0	0/0	0/0	0/0	0/0	0/0	0/0	0/0	0/0	G|downstream_gene_variant|MODIFIER|EPlOSAG00000003974|EPlOSAG00000003974|transcript|EPlOSAT00000005362|lincRNA||n.*4143_*4199delTTTTTTTATTTTTGTTTTTATTCTAATGCCACGTAAGCACCACGTAGGACAAAGACT|||||4199|,G|intergenic_region|MODIFIER|OS01G0567600-EPlOSAG00000003974|OS01G0567600-EPlOSAG00000003974|intergenic_region|OS01G0567600-EPlOSAG00000003974|||n.21731815_21731871delAGTCTTTGTCCTACGTGGTGCTTACGTGGCATTAGA…
chr01	21760537	A	AGTGGACACACAAGATATAGG	2073.1	0/0	0/0	0/0	0/0	0/0	0/0	1/1	0/0	0/0	0/0	0/0	0/0	0/0	0/0	0/0	0/0	0/0	0/0	0/0	0/0	0/0	0/0	0/0	0/0	AGTGGACACACAAGATATAGG|downstream_gene_variant|MODIFIER|EPlOSAG00000026665|EPlOSAG00000026665|transcript|EPlOSAT00000028053|lincRNA||n.*1197_*1198insCCTATATCTTGTGTGTCCAC|||||1197|,AGTGGACACACAAGATATAGG|intergenic_region|MODIFIER|EPlOSAG00000018773-EPlOSAG00000026665|EPlOSAG00000018773-EPlOSAG00000026665|intergenic_region|EPlOSAG00000018773-EPlOSAG00000026665|||n.21760537_21760538insGTGGACACACAAGAT…
chr01	21763642	CTCCAAGCTGAGGGACTGGTTTGGACTT	C	19921.9	0/0	0/0	1/1	1/1	0/0	0/0	0/0	1/1	1/1	0/0	0/0	0/0	0/0	1/1	0/0	0/0	1/1	0/0	1/1	1/1	0/0	0/0	1/1	0/0	C|upstream_gene_variant|MODIFIER|EPlOSAG00000026665|EPlOSAG00000026665|transcript|EPlOSAT00000028053|lincRNA||n.-1779_-1753delAAGTCCAAACCAGTCCCTCAGCTTGGA|||||1753|,C|upstream_gene_variant|MODIFIER|EPlOSAG00000053028|EPlOSAG00000053028|transcript|EPlOSAT00000053028|lincRNA||n.-2471_-2445delTCCAAGCTGAGGGACTGGTTTGGACTT|||||2471|,C|upstream_gene_variant|MODIFIER|EPlOSAG00000023229|EPlOSAG00000023229|…
chr01	21803116	GCCTCCTTGCTTCTTTGGGAAACGAAAGAGGGAGAGAGGGCGACGCGGCAGAAGGAGGAGGAGCTCTGCCTC	G	647.06	0/0	0/0	0/0	0/0	0/0	0/0	1/1	0/0	0/0	0/0	0/0	0/0	0/0	0/0	0/0	0/0	0/0	0/0	0/0	0/0	0/0	0/0	0/0	0/0	G|upstream_gene_variant|MODIFIER|OS01G0568950|OS01G0568950|transcript|OS01T0568950-00|protein_coding||c.-2205_-2135delCCTCCTTGCTTCTTTGGGAAACGAAAGAGGGAGAGAGGGCGACGCGGCAGAAGGAGGAGGAGCTCTGCCTC|||||2205|WARNING_TRANSCRIPT_NO_START_CODON,G|intergenic_region|MODIFIER|OS01G0568800-OS01G0568950|OS01G0568800-OS01G0568950|intergenic_region|OS01G0568800-OS01G0568950|||n.21803117_21803187delCCTCCTTGCTTCTTTGG…
chr01	21810534	CCAATTGATTGCAAAAGTCGATTCCCCA	C	866.06	0/0	0/0	0/0	0/0	0/0	0/0	1|1	0/0	0/0	0/0	0/0	0/0	0/0	0/0	0/0	0/0	0/0	0/0	0/0	0/0	0/0	0/0	0/0	0/0	C|upstream_gene_variant|MODIFIER|OS01G0569200|OS01G0569200|transcript|OS01T0569200-00|protein_coding||c.-4261_-4235delCAATTGATTGCAAAAGTCGATTCCCCA|||||4261|,C|downstream_gene_variant|MODIFIER|OS01G0568950|OS01G0568950|transcript|OS01T0568950-00|protein_coding||c.*440_*466delCAATTGATTGCAAAAGTCGATTCCCCA|||||437|WARNING_TRANSCRIPT_NO_START_CODON,C|downstream_gene_variant|MODIFIER|EPlOSAG00000004526|E…
chr01	21837189	ATATATATATATATATATGTATGTG	A	1951.65	0/0	0/0	0/0	0/0	1/1	0/0	./.	0/0	0/0	0/0	0/0	0/0	1/1	0/0	0/0	0/0	0/0	0/0	0/0	0/0	0/0	0/0	0/0	0/0	A|upstream_gene_variant|MODIFIER|OS01G0569800|OS01G0569800|transcript|OS01T0569800-01|protein_coding||c.-5062_-5039delCACATACATATATATATATATATA|||||2041|WARNING_TRANSCRIPT_NO_START_CODON,A|upstream_gene_variant|MODIFIER|EPlOSAG00000048966|EPlOSAG00000048966|transcript|EPlOSAT00000050354|lincRNA||n.-4590_-4567delCACATACATATATATATATATATA|||||4567|,A|upstream_gene_variant|MODIFIER|EPlOSAG00000013301|…
chr01	21995024	T	TTGCCCATAGGACAAAAGGAAAGCAAAGCTA	5741.77	0/0	0/0	0/0	0/0	1/1	0/0	1/1	0/0	0/0	0/0	0/0	0/0	1/1	0/0	0/0	0/0	0/0	0/0	0/0	0/0	0/0	0/0	0/0	0/0	TTGCCCATAGGACAAAAGGAAAGCAAAGCTA|upstream_gene_variant|MODIFIER|EPlOSAG00000023338|EPlOSAG00000023338|transcript|EPlOSAT00000024726|lincRNA||n.-4304_-4303insTAGCTTTGCTTTCCTTTTGTCCTATGGGCA|||||4304|,TTGCCCATAGGACAAAAGGAAAGCAAAGCTA|upstream_gene_variant|MODIFIER|OS01G0572200|OS01G0572200|transcript|OS01T0572200-01|protein_coding||c.-607_-606insTAGCTTTGCTTTCCTTTTGTCCTATGGGCA|||||533|,TTGCCCATAGGACAAA…
chr01	22206501	T	TGTATGTATACGTATGTATATGTATGTATAC	215.69	0/0	0/0	0/0	0/0	0/0	0/0	0/0	0/0	0/0	0/0	0/0	0/0	1/1	0/0	0/0	0/0	0/0	0/0	0/0	0/0	0/0	0/0	0/0	0/0	TGTATGTATACGTATGTATATGTATGTATAC|upstream_gene_variant|MODIFIER|EPlOSAG00000026333|EPlOSAG00000026333|transcript|EPlOSAT00000027721|lincRNA||n.-1119_-1118insGTATACATACATATACATACGTATACATAC|||||1119|,TGTATGTATACGTATGTATATGTATGTATAC|downstream_gene_variant|MODIFIER|EPlOSAG00000022934|EPlOSAG00000022934|transcript|EPlOSAT00000024322|lincRNA||n.*2251_*2252insGTATACATACATATACATACGTATACATAC|||||2251|,TGT…
chr01	22309900	TGCCTTACAGAGAGCCCTCATGCGCCATGCACTATATACCCGCACATTGACCCGTACGCACAATCGCTGCCACATAG	T	1819.06	0/0	0/0	0/0	0/0	0/0	0/0	0/0	0/0	0/0	0/0	0/0	1/1	0/0	0/0	0/0	0/0	0/0	0/0	0/0	0/0	0/0	0/0	0/0	0/0	T|upstream_gene_variant|MODIFIER|EPlOSAG00000035259|EPlOSAG00000035259|transcript|EPlOSAT00000036647|lincRNA||n.-3772_-3697delCTATGTGGCAGCGATTGTGCGTACGGGTCAATGTGCGGGTATATAGTGCATGGCGCATGAGGGCTCTCTGTAAGGC|||||3697|,T|upstream_gene_variant|MODIFIER|EPlOSAG00000011301|EPlOSAG00000011301|transcript|EPlOSAT00000012689|lincRNA||n.-2684_-2609delCTATGTGGCAGCGATTGTGCGTACGGGTCAATGTGCGGGTATATAGTGCATGGCGCATGA…
chr01	22387053	ATATATATACATATATATACG	A	1372.66	0/0	0/0	0/0	0/0	0/0	0/0	1/1	0/0	0/0	0/0	1/1	0/0	0/0	0/0	0/0	1/1	0/0	0/0	0/0	0/0	0/0	0/0	0/0	1/1	A|upstream_gene_variant|MODIFIER|EPlOSAG00000004242|EPlOSAG00000004242|transcript|EPlOSAT00000005630|lincRNA||n.-2173_-2154delTATATATACATATATATACG|||||2173|,A|downstream_gene_variant|MODIFIER|OS01G0578700|OS01G0578700|transcript|OS01T0578700-01|protein_coding||c.*4554_*4573delTATATATACATATATATACG|||||4178|,A|downstream_gene_variant|MODIFIER|OS01G0578800|OS01G0578800|transcript|OS01T0578800-01|pro…
chr01	22691244	C	CTATATATATATATATATATATATATATATATA	119.74	0/0	0/0	./.	0/0	0/0	0/0	0/0	0/0	0/0	./.	0/0	0/0	0/0	0/0	0/0	1/1	0/0	0/0	0/0	0/0	0/0	0/0	0/0	0/0	CTATATATATATATATATATATATATATATATA|upstream_gene_variant|MODIFIER|OS01G0584200|OS01G0584200|transcript|OS01T0584200-00|protein_coding||c.-3935_-3934insTATATATATATATATATATATATATATATATA|||||3177|,CTATATATATATATATATATATATATATATATA|upstream_gene_variant|MODIFIER|EPlOSAG00000026717|EPlOSAG00000026717|transcript|EPlOSAT00000028105|lincRNA||n.-4801_-4800insTATATATATATATATATATATATATATATATA|||||4800|,CTATA…
chr01	22729658	T	TCAACTGGTTAGGTTTCTTATGGTGG	4774.1	0/0	0/0	0/0	0/0	0/0	0/0	0/0	0/0	0/0	0/0	0/0	1/1	0/0	0/0	0/0	0/0	0/0	0/0	0/0	0/0	0/0	0/0	0/0	0/0	TCAACTGGTTAGGTTTCTTATGGTGG|upstream_gene_variant|MODIFIER|OS01G0584900|OS01G0584900|transcript|OS01T0584900-01|protein_coding||c.-2328_-2327insCAACTGGTTAGGTTTCTTATGGTGG|||||2284|,TCAACTGGTTAGGTTTCTTATGGTGG|downstream_gene_variant|MODIFIER|OS01G0584800|OS01G0584800|transcript|OS01T0584800-01|protein_coding||c.*1576_*1577insCAACTGGTTAGGTTTCTTATGGTGG|||||1271|WARNING_TRANSCRIPT_NO_START_CODON,TCAACT…
chr01	22828390	A	ATATCTATCTATCTATCTATC	2341.1	0/0	0/0	0/0	0/0	0/0	0/0	0/0	0/0	0/0	0/0	0/0	1/1	0/0	0/0	0/0	0/0	0/0	0/0	0/0	0/0	0/0	0/0	0/0	0/0	ATATCTATCTATCTATCTATC|upstream_gene_variant|MODIFIER|OS01G0586800|OS01G0586800|transcript|OS01T0586800-00|protein_coding||c.-2236_-2235insGATAGATAGATAGATAGATA|||||2114|WARNING_TRANSCRIPT_NO_START_CODON,ATATCTATCTATCTATCTATC|intergenic_region|MODIFIER|OS01G0586800-OS01G0586801|OS01G0586800-OS01G0586801|intergenic_region|OS01G0586800-OS01G0586801|||n.22828390_22828391insTATCTATCTATCTATCTATC||||||
chr01	22997829	CAAT	CAATAATAATAATAATAATAATAATAATAAT,C	1714.18	0/0	0/0	0/0	0/0	0/0	./.	0/0	0/0	0/0	0/0	0/0	1/1	0/0	0/0	0/0	0/0	0/0	0/0	0/0	0/0	0/0	0/0	0/0	2/2	C|upstream_gene_variant|MODIFIER|OS01G0589400|OS01G0589400|transcript|OS01T0589400-01|protein_coding||c.-3661_-3659delATT|||||3572|,CAATAATAATAATAATAATAATAATAATAAT|upstream_gene_variant|MODIFIER|OS01G0589400|OS01G0589400|transcript|OS01T0589400-01|protein_coding||c.-3662_-3661insATTATTATTATTATTATTATTATTATT|||||3575|,C|upstream_gene_variant|MODIFIER|OS01G0589700|OS01G0589700|transcript|OS01T058970…
chr01	23003314	ATTGATTACGGCTTATAGTTTAGGACG	A	3304.06	0/0	0/0	0/0	0/0	0/0	0/0	0/0	0/0	0/0	0/0	0/0	1/1	0/0	0/0	0/0	0/0	0/0	0/0	0/0	0/0	0/0	0/0	0/0	0/0	A|upstream_gene_variant|MODIFIER|OS01G0589500|OS01G0589500|transcript|OS01T0589500-01|protein_coding||c.-5150_-5125delCGTCCTAAACTATAAGCCGTAATCAA|||||4974|,A|upstream_gene_variant|MODIFIER|OS01G0589800|OS01G0589800|transcript|OS01T0589800-01|protein_coding||c.-813_-788delTTGATTACGGCTTATAGTTTAGGACG|||||812|WARNING_TRANSCRIPT_NO_START_CODON,A|downstream_gene_variant|MODIFIER|OS01G0589700|OS01G058970…
chr01	23120896	G	GAATAATAATAATAATAATAATAATAATAATAAT	403.32	0/0	0/0	0/0	0/0	0/0	0/0	0/0	0/0	0/0	0/0	0/0	1/1	0/0	0/0	0/0	0/0	0/0	0/0	0/0	0/0	0/0	0/0	0/0	0/0	GAATAATAATAATAATAATAATAATAATAATAAT|upstream_gene_variant|MODIFIER|OS01G0591500|OS01G0591500|transcript|OS01T0591500-00|lincRNA||n.-375_-374insATTATTATTATTATTATTATTATTATTATTATT|||||375|,GAATAATAATAATAATAATAATAATAATAATAAT|downstream_gene_variant|MODIFIER|OS01G0591300|OS01G0591300|transcript|OS01T0591300-01|protein_coding||c.*1466_*1467insAATAATAATAATAATAATAATAATAATAATAAT|||||1193|,GAATAATAATAATAATA…
chr01	23172229	A	AAGGGGAGAGAGAGAGAGAAGGGCGAG	5192.1	0/0	0/0	0/0	0/0	0/0	0/0	0/0	0/0	0/0	0/0	0/0	1/1	0/0	0/0	0/0	0/0	0/0	0/0	0/0	0/0	0/0	0/0	0/0	0/0	AAGGGGAGAGAGAGAGAGAAGGGCGAG|upstream_gene_variant|MODIFIER|OS01G0592500|OS01G0592500|transcript|OS01T0592500-01|protein_coding||c.-3905_-3904insCTCGCCCTTCTCTCTCTCTCTCCCCT|||||3752|,AAGGGGAGAGAGAGAGAGAAGGGCGAG|downstream_gene_variant|MODIFIER|OS01G0592900|OS01G0592900|transcript|OS01T0592900-02|protein_coding||c.*4765_*4766insCTCGCCCTTCTCTCTCTCTCTCCCCT|||||2650|,AAGGGGAGAGAGAGAGAGAAGGGCGAG|downstr…
chr01	23219735	GCTATTAAATTGATTATAGATA	G	5927.06	0/0	0/0	0/0	0/0	0/0	0/0	0/0	0/0	0/0	0/0	0/0	1|1	0/0	0/0	0/0	0/0	0/0	0/0	0/0	0/0	0/0	0/0	0/0	0/0	G|upstream_gene_variant|MODIFIER|OS01G0593100|OS01G0593100|transcript|OS01T0593100-00|protein_coding||c.-3795_-3775delTATCTATAATCAATTTAATAG|||||3775|,G|upstream_gene_variant|MODIFIER|OS01G0593200|OS01G0593200|transcript|OS01T0593200-01|protein_coding||c.-5527_-5507delCTATTAAATTGATTATAGATA|||||4637|,G|downstream_gene_variant|MODIFIER|EPlOSAG00000049002|EPlOSAG00000049002|transcript|EPlOSAT00000050…
chr01	23228294	CGTCATTCGTTAAAATACAGAGGGA	C	6814.98	0/0	0/0	0/0	0/0	1/1	0/0	1/1	0/0	0/0	0/0	1/1	0/0	1/1	0/0	0/0	1/1	0/0	0/0	0/0	0/0	0/0	0/0	0/0	1/1	C|downstream_gene_variant|MODIFIER|OS01G0593200|OS01G0593200|transcript|OS01T0593200-01|protein_coding||c.*2110_*2133delGTCATTCGTTAAAATACAGAGGGA|||||1690|,C|downstream_gene_variant|MODIFIER|EPlOSAG00000021042|EPlOSAG00000021042|transcript|EPlOSAT00000022430|lincRNA||n.*1054_*1077delTCCCTCTGTATTTTAACGAATGAC|||||1077|,C|intergenic_region|MODIFIER|OS01G0593200-EPlOSAG00000021042|OS01G0593200-EPlOSAG…
chr01	23242772	TTAGAAGCGTACAAAATAAACTTTGA	T	3480.06	0/0	0/0	0/0	0/0	0/0	0/0	0/0	0/0	0/0	0/0	0/0	1/1	0/0	0/0	0/0	0/0	0/0	0/0	0/0	0/0	0/0	0/0	0/0	0/0	T|upstream_gene_variant|MODIFIER|OS01G0593700|OS01G0593700|transcript|OS01T0593700-01|protein_coding||c.-4623_-4599delTAGAAGCGTACAAAATAAACTTTGA|||||4505|,T|downstream_gene_variant|MODIFIER|OS01G0593900|OS01G0593900|transcript|OS01T0593900-00|protein_coding||c.*4944_*4968delTCAAAGTTTATTTTGTACGCTTCTA|||||4536|,T|intron_variant|MODIFIER|OS01G0593600|OS01G0593600|transcript|OS01T0593600-01|protein_co…
chr01	23311842	ATATATATATATATATATATATATATATATATATATATATG	A,*	3722.02	2|2	0/0	0/0	./.	./.	0/0	2/2	0/0	./.	./.	./.	2/2	./.	0/0	1|1	./.	0/0	2|2	./.	0/0	1|1	0/0	0/0	./.	A|upstream_gene_variant|MODIFIER|EPlOSAG00000044235|EPlOSAG00000044235|transcript|EPlOSAT00000045623|lincRNA||n.-1716_-1677delCATATATATATATATATATATATATATATATATATATATA|||||1677|,A|upstream_gene_variant|MODIFIER|EPlOSAG00000045901|EPlOSAG00000045901|transcript|EPlOSAT00000047289|lincRNA||n.-1375_-1336delCATATATATATATATATATATATATATATATATATATATA|||||1336|,A|upstream_gene_variant|MODIFIER|OS01G0595100…
chr01	23314879	CCAGCACGGTGTACGCTACCTATGTCAT	C	11567.3	1|1	0/0	0/0	0/0	0/0	0/0	0/0	0/0	0/0	0/0	0/0	0/0	0/0	0/0	1|1	0/0	0/0	1|1	0/0	0/0	1|1	0/0	0/0	0/0	C|upstream_gene_variant|MODIFIER|EPlOSAG00000044235|EPlOSAG00000044235|transcript|EPlOSAT00000045623|lincRNA||n.-4740_-4714delATGACATAGGTAGCGTACACCGTGCTG|||||4714|,C|upstream_gene_variant|MODIFIER|EPlOSAG00000045901|EPlOSAG00000045901|transcript|EPlOSAT00000047289|lincRNA||n.-4399_-4373delATGACATAGGTAGCGTACACCGTGCTG|||||4373|,C|upstream_gene_variant|MODIFIER|OS01G0594900|OS01G0594900|transcript|O…
chr01	23323944	ACTGAAATATCAAATACGCGTGCGTACAG	A	8134.57	1/1	0/0	0/0	0/0	0/0	0/0	1/1	0/0	0/0	0/0	1/1	1/1	0/0	0/0	1/1	1/1	0/0	1/1	0/0	0/0	1/1	0/0	0/0	1/1	A|upstream_gene_variant|MODIFIER|OS01G0595201|OS01G0595201|transcript|OS01T0595201-00|protein_coding||c.-520_-493delCTGAAATATCAAATACGCGTGCGTACAG|||||515|,A|upstream_gene_variant|MODIFIER|EPlOSAG00000028539|EPlOSAG00000028539|transcript|EPlOSAT00000029927|lincRNA||n.-4234_-4207delCTGAAATATCAAATACGCGTGCGTACAG|||||4234|,A|downstream_gene_variant|MODIFIER|OS01G0595100|OS01G0595100|transcript|OS01T059…
chr01	23324961	TGATATAGTGATCTCTCTACTC	T	4209.79	0/0	0/0	0/0	0/0	1/1	0/0	0/0	0/0	0/0	0/0	0/0	0/0	1/1	0/0	0/0	0/0	0/0	0/0	0/0	0/0	0/0	0/0	0/0	0/0	T|upstream_gene_variant|MODIFIER|EPlOSAG00000028539|EPlOSAG00000028539|transcript|EPlOSAT00000029927|lincRNA||n.-3217_-3197delGATATAGTGATCTCTCTACTC|||||3217|,T|upstream_gene_variant|MODIFIER|EPlOSAG00000030169|EPlOSAG00000030169|transcript|EPlOSAT00000031557|lincRNA||n.-4348_-4328delGATATAGTGATCTCTCTACTC|||||4348|,T|upstream_gene_variant|MODIFIER|OS01G0595300|OS01G0595300|transcript|OS01T0595300-…
chr01	23326100	AGAGAGAGAGAGAGAGAGAGAGAGAGTGAGGGGGAGTGAGAGTGAGGTGAGCGGT	A	1987.73	0/0	0/0	0/0	0/0	0/0	0/0	./.	0/0	0/0	0/0	1/1	0/0	0/0	0/0	0/0	1/1	0/0	0/0	0/0	0/0	0/0	0/0	0/0	1/1	A|upstream_gene_variant|MODIFIER|EPlOSAG00000028539|EPlOSAG00000028539|transcript|EPlOSAT00000029927|lincRNA||n.-2078_-2025delGAGAGAGAGAGAGAGAGAGAGAGAGTGAGGGGGAGTGAGAGTGAGGTGAGCGGT|||||2078|,A|upstream_gene_variant|MODIFIER|EPlOSAG00000030169|EPlOSAG00000030169|transcript|EPlOSAT00000031557|lincRNA||n.-3209_-3156delGAGAGAGAGAGAGAGAGAGAGAGAGTGAGGGGGAGTGAGAGTGAGGTGAGCGGT|||||3209|,A|upstream_gene_v…
chr01	23326102	AGAGAGAGAGAGAGAGAGAGAGAGTGAGGGGGAGTGAGAGTGAGGTGAGCGGT	A,*	2045.76	0/0	0/0	0/0	0/0	0/0	0/0	./.	0/0	0/0	0/0	2/2	1/1	0/0	0/0	0/0	2/2	0/0	0/0	0/0	0/0	0/0	0/0	0/0	2/2	A|upstream_gene_variant|MODIFIER|EPlOSAG00000028539|EPlOSAG00000028539|transcript|EPlOSAT00000029927|lincRNA||n.-2076_-2025delGAGAGAGAGAGAGAGAGAGAGAGTGAGGGGGAGTGAGAGTGAGGTGAGCGGT|||||2076|,A|upstream_gene_variant|MODIFIER|EPlOSAG00000030169|EPlOSAG00000030169|transcript|EPlOSAT00000031557|lincRNA||n.-3207_-3156delGAGAGAGAGAGAGAGAGAGAGAGTGAGGGGGAGTGAGAGTGAGGTGAGCGGT|||||3207|,A|upstream_gene_varia…
chr01	23326136	TGAGAGTGAGGTGAGCGGTGAGAGAGAGAGAGAGAGAGA	*,T	5624.14	2|2	0/0	0/0	0/0	0/0	0/0	1/1	0/0	0/0	0/0	1/1	1/1	0/0	0/0	2|2	1/1	0/0	2/2	0/0	0/0	2|2	0/0	0/0	1/1	T|upstream_gene_variant|MODIFIER|EPlOSAG00000028539|EPlOSAG00000028539|transcript|EPlOSAT00000029927|lincRNA||n.-2042_-2005delGAGAGTGAGGTGAGCGGTGAGAGAGAGAGAGAGAGAGA|||||2042|,T|upstream_gene_variant|MODIFIER|EPlOSAG00000030169|EPlOSAG00000030169|transcript|EPlOSAT00000031557|lincRNA||n.-3173_-3136delGAGAGTGAGGTGAGCGGTGAGAGAGAGAGAGAGAGAGA|||||3173|,T|upstream_gene_variant|MODIFIER|OS01G0595300|OS0…
chr01	23326304	GGAGGAGAAGAGGGGCGACGAAGAAGAATAGGCACGAAGAAAAA	G,*	6688.49	2/2	0/0	0/0	0/0	0/0	0/0	1/1	0/0	0/0	0/0	1/1	1/1	0/0	0/0	2/2	1/1	0/0	2/2	0/0	0/0	2/2	0/0	0/0	1/1	G|upstream_gene_variant|MODIFIER|EPlOSAG00000028539|EPlOSAG00000028539|transcript|EPlOSAT00000029927|lincRNA||n.-1874_-1832delGAGGAGAAGAGGGGCGACGAAGAAGAATAGGCACGAAGAAAAA|||||1874|,G|upstream_gene_variant|MODIFIER|EPlOSAG00000030169|EPlOSAG00000030169|transcript|EPlOSAT00000031557|lincRNA||n.-3005_-2963delGAGGAGAAGAGGGGCGACGAAGAAGAATAGGCACGAAGAAAAA|||||3005|,G|upstream_gene_variant|MODIFIER|OS01G0…
chr01	23331772	A	AGCATGCTTTTTTTTTTCACAGTTTGGGTGGAAATAGGCTGTCCACT	31888	1/1	0/0	0/0	0/0	1/1	0/0	1/1	0/0	0/0	0/0	1/1	1/1	1/1	0/0	1/1	1/1	0/0	1/1	0/0	0/0	1/1	0/0	0/0	1/1	AGCATGCTTTTTTTTTTCACAGTTTGGGTGGAAATAGGCTGTCCACT|upstream_gene_variant|MODIFIER|EPlOSAG00000030969|EPlOSAG00000030969|transcript|EPlOSAT00000032357|lincRNA||n.-3423_-3422insAGTGGACAGCCTATTTCCACCCAAACTGTGAAAAAAAAAAGCATGC|||||3423|,AGCATGCTTTTTTTTTTCACAGTTTGGGTGGAAATAGGCTGTCCACT|upstream_gene_variant|MODIFIER|EPlOSAG00000012401|EPlOSAG00000012401|transcript|EPlOSAT00000013789|lincRNA||n.-3506_-3505i…
chr01	23343879	TTTGATCGATTCATTGCAAAC	T	2002.73	0/0	0/0	0/0	0/0	0/0	0/0	1|1	0/0	0/0	0/0	1|1	1|1	0/0	0/0	0/0	1|1	0/0	0/0	0/0	0/0	0/0	0/0	0/0	1|1	T|upstream_gene_variant|MODIFIER|EPlOSAG00000028209|EPlOSAG00000028209|transcript|EPlOSAT00000029597|lincRNA||n.-1238_-1219delGTTTGCAATGAATCGATCAA|||||1219|,T|downstream_gene_variant|MODIFIER|EPlOSAG00000027552|EPlOSAG00000027552|transcript|EPlOSAT00000028940|lincRNA||n.*1221_*1240delTTGATCGATTCATTGCAAAC|||||1221|,T|downstream_gene_variant|MODIFIER|OS01G0595725|OS01G0595725|transcript|OS01T059572…
chr01	23347537	T	TAATCTATCCCATGCATATTAGGCCTTGTTTG	5677.98	0/0	0/0	0/0	0/0	./.	0/0	1|1	0/0	0/0	0/0	1|1	1|1	./.	0/0	0/0	1|1	0/0	0/0	0/0	0/0	0/0	0/0	0/0	1|1	TAATCTATCCCATGCATATTAGGCCTTGTTTG|upstream_gene_variant|MODIFIER|EPlOSAG00000028209|EPlOSAG00000028209|transcript|EPlOSAT00000029597|lincRNA||n.-4877_-4876insCAAACAAGGCCTAATATGCATGGGATAGATT|||||4877|,TAATCTATCCCATGCATATTAGGCCTTGTTTG|downstream_gene_variant|MODIFIER|EPlOSAG00000027552|EPlOSAG00000027552|transcript|EPlOSAT00000028940|lincRNA||n.*4878_*4879insAATCTATCCCATGCATATTAGGCCTTGTTTG|||||4879|…
chr01	23347539	A	ACCGAACAAAATCGCGGTCCATCCATCCACACACATGGATGGCCCGAAAATGCGG,ATCTATCCCGTGCATATTAGGCCTTGTTTGGACCGAACAAAATCGCGGTCCATCCATCCACACACATGGATGGGCCGAAAATGCGG	29729.2	2/2	0/0	0/0	0/0	2/2	0/0	1|1	0/0	0/0	0/0	1|1	1|1	2/2	0/0	2/2	1|1	0/0	2/2	0/0	0/0	2/2	0/0	0/0	1|1	ACCGAACAAAATCGCGGTCCATCCATCCACACACATGGATGGCCCGAAAATGCGG|upstream_gene_variant|MODIFIER|EPlOSAG00000028209|EPlOSAG00000028209|transcript|EPlOSAT00000029597|lincRNA||n.-4879_-4878insCCGCATTTTCGGGCCATCCATGTGTGTGGATGGATGGACCGCGATTTTGTTCGG|||||4879|,ATCTATCCCGTGCATATTAGGCCTTGTTTGGACCGAACAAAATCGCGGTCCATCCATCCACACACATGGATGGGCCGAAAATGCGG|upstream_gene_variant|MODIFIER|EPlOSAG00000028209|EPlOSAG0000002820…
chr01	23349307	G	GAAGGTATCTTCTAATACCTGTCATTTGTACATGTGCGATGCTCTTACTTTCTGAGTCATATCAGCATGTTTTGCCCATTAGCAAAATCTGCATCTCAGAACAGCACAATGCATCCTTACTACTTATGAGCATGTTTGGTTGA	18792.2	1|1	0/0	0/0	0/0	./.	0/0	0/0	0/0	0/0	0/0	0/0	0/0	./.	0/0	1|1	0/0	0/0	1|1	0/0	0/0	1|1	0/0	0/0	0/0	GAAGGTATCTTCTAATACCTGTCATTTGTACATGTGCGATGCTCTTACTTTCTGAGTCATATCAGCATGTTTTGCCCATTAGCAAAATCTGCATCTCAGAACAGCACAATGCATCCTTACTACTTATGAGCATGTTTGGTTGA|upstream_gene_variant|MODIFIER|OS01G0595800|OS01G0595800|transcript|OS01T0595800-00|protein_coding||c.-4230_-4229insAAGGTATCTTCTAATACCTGTCATTTGTACATGTGCGATGCTCTTACTTTCTGAGTCATATCAGCATGTTTTGCCCATTAGCAAAATCTGCATCTCAGAACAGCACAATGCATCCTTACTACTTATGAGCATGTTTGGT…
chr01	23354962	C	CAACTCAAAACAGAAAGTAAGAA	295.41	0/0	0/0	0/0	0/0	0/0	0/0	./.	0/0	0/0	0/0	./.	1|1	0/0	0/0	0/0	0/0	0/0	0/0	0/0	0/0	0/0	0/0	0/0	1/1	CAACTCAAAACAGAAAGTAAGAA|upstream_gene_variant|MODIFIER|OS01G0595725|OS01G0595725|transcript|OS01T0595725-00|protein_coding||c.-2008_-2007insTTCTTACTTTCTGTTTTGAGTT|||||1902|WARNING_TRANSCRIPT_NO_STOP_CODON,CAACTCAAAACAGAAAGTAAGAA|upstream_gene_variant|MODIFIER|EPlOSAG00000039764|EPlOSAG00000039764|transcript|EPlOSAT00000041152|lincRNA||n.-141_-140insTTCTTACTTTCTGTTTTGAGTT|||||141|,CAACTCAAAACAGAAA…
chr01	23356882	A	ATTACATTGGCTATAGATGATTTGGT	11481.1	1|1	0/0	0/0	0/0	0/0	0/0	./.	0/0	0/0	0/0	./.	./.	0/0	0/0	1|1	./.	0/0	1|1	0/0	0/0	1|1	0/0	0/0	./.	ATTACATTGGCTATAGATGATTTGGT|upstream_gene_variant|MODIFIER|OS01G0595725|OS01G0595725|transcript|OS01T0595725-00|protein_coding||c.-3928_-3927insACCAAATCATCTATAGCCAATGTAA|||||3822|WARNING_TRANSCRIPT_NO_STOP_CODON,ATTACATTGGCTATAGATGATTTGGT|upstream_gene_variant|MODIFIER|EPlOSAG00000039764|EPlOSAG00000039764|transcript|EPlOSAT00000041152|lincRNA||n.-2061_-2060insACCAAATCATCTATAGCCAATGTAA|||||2061|,A…
chr01	23360615	T	TGCCTCTCCCTTCGTTGTCCCGGCGAGGCG	9718.92	0/0	0/0	0/0	0/0	0/0	0/0	1|1	0/0	0/0	0/0	1|1	1|1	0/0	0/0	0/0	1|1	0/0	0/0	0/0	0/0	0/0	0/0	0/0	1|1	TGCCTCTCCCTTCGTTGTCCCGGCGAGGCG|upstream_gene_variant|MODIFIER|OS01G0596001|OS01G0596001|transcript|OS01T0596001-00|protein_coding||c.-2154_-2153insCGCCTCGCCGGGACAACGAAGGGAGAGGC|||||1655|WARNING_TRANSCRIPT_INCOMPLETE,TGCCTCTCCCTTCGTTGTCCCGGCGAGGCG|upstream_gene_variant|MODIFIER|EPlOSAG00000026990|EPlOSAG00000026990|transcript|EPlOSAT00000028378|lincRNA||n.-154_-153insCGCCTCGCCGGGACAACGAAGGGAGAGGC|…
chr01	23363111	A	AGAAATTAACTGTTTTTTTAAAG	7719.92	0/0	0/0	0/0	0/0	0/0	0/0	1/1	0/0	0/0	0/0	1/1	1/1	0/0	0/0	0/0	1/1	0/0	0/0	0/0	0/0	0/0	0/0	0/0	1/1	AGAAATTAACTGTTTTTTTAAAG|upstream_gene_variant|MODIFIER|OS01G0596001|OS01G0596001|transcript|OS01T0596001-00|protein_coding||c.-4650_-4649insCTTTAAAAAAACAGTTAATTTC|||||4151|WARNING_TRANSCRIPT_INCOMPLETE,AGAAATTAACTGTTTTTTTAAAG|upstream_gene_variant|MODIFIER|EPlOSAG00000026990|EPlOSAG00000026990|transcript|EPlOSAT00000028378|lincRNA||n.-2650_-2649insCTTTAAAAAAACAGTTAATTTC|||||2650|,AGAAATTAACTGTTTT…
chr01	23390907	GGGTGGGGGGGGGGGGGGAGGGGGGGATAGACAA	G	6516.14	1/1	0/0	0/0	./.	./.	0/0	0/0	./.	./.	./.	./.	0/0	0/0	0/0	1/1	0/0	0/0	1/1	./.	0/0	1/1	0/0	0/0	./.	G|upstream_gene_variant|MODIFIER|EPlOSAG00000004750|EPlOSAG00000004750|transcript|EPlOSAT00000006138|lincRNA||n.-4711_-4679delTTGTCTATCCCCCCCTCCCCCCCCCCCCCCACC|||||4679|,G|upstream_gene_variant|MODIFIER|EPlOSAG00000013064|EPlOSAG00000013064|transcript|EPlOSAT00000014452|lincRNA||n.-3257_-3225delTTGTCTATCCCCCCCTCCCCCCCCCCCCCCACC|||||3225|,G|downstream_gene_variant|MODIFIER|OS01G0596500|OS01G059650…
chr01	23407664	A	AATGCCACTTCGGTTATCATT,AATGCCACTTAGGTTATCATT	18791.9	1|1	0/0	0/0	0/0	2|2	0/0	0/0	0/0	0/0	0/0	0/0	0/0	2|2	0/0	1|1	0/0	0/0	1|1	0/0	0/0	1|1	0/0	0/0	0/0	AATGCCACTTAGGTTATCATT|upstream_gene_variant|MODIFIER|OS01G0596700|OS01G0596700|transcript|OS01T0596700-01|protein_coding||c.-1034_-1033insATGCCACTTAGGTTATCATT|||||958|,AATGCCACTTCGGTTATCATT|upstream_gene_variant|MODIFIER|OS01G0596700|OS01G0596700|transcript|OS01T0596700-01|protein_coding||c.-1034_-1033insATGCCACTTCGGTTATCATT|||||958|,AATGCCACTTAGGTTATCATT|downstream_gene_variant|MODIFIER|OS01G059…
chr01	23414737	TGTATTGTATCAATAATAACAAGTATCATTGTATATATC	T	7600.34	1/1	0/0	0/0	0/0	0/0	0/0	0/0	0/0	0/0	0/0	0/0	0/0	0/0	0/0	1/1	0/0	0/0	1/1	0/0	0/0	1/1	0/0	0/0	0/0	T|upstream_gene_variant|MODIFIER|EPlOSAG00000040767|EPlOSAG00000040767|transcript|EPlOSAT00000042155|lincRNA||n.-1355_-1318delGATATATACAATGATACTTGTTATTATTGATACAATAC|||||1318|,T|upstream_gene_variant|MODIFIER|EPlOSAG00000034858|EPlOSAG00000034858|transcript|EPlOSAT00000036246|lincRNA||n.-1526_-1489delGTATTGTATCAATAATAACAAGTATCATTGTATATATC|||||1526|,T|downstream_gene_variant|MODIFIER|OS01G0596700|O…
chr01	23417033	CCTAGGTGGAATCAGGATTACCAATAAAAAGCGG	C	2634.79	0/0	0/0	0/0	0/0	1|1	0/0	0/0	0/0	0/0	0/0	0/0	0/0	1|1	0/0	0/0	0/0	0/0	0/0	0/0	0/0	0/0	0/0	0/0	0/0	C|upstream_gene_variant|MODIFIER|EPlOSAG00000040767|EPlOSAG00000040767|transcript|EPlOSAT00000042155|lincRNA||n.-3646_-3614delCCGCTTTTTATTGGTAATCCTGATTCCACCTAG|||||3614|,C|upstream_gene_variant|MODIFIER|EPlOSAG00000036938|EPlOSAG00000036938|transcript|EPlOSAT00000038326|lincRNA||n.-647_-615delCCGCTTTTTATTGGTAATCCTGATTCCACCTAG|||||615|,C|downstream_gene_variant|MODIFIER|EPlOSAG00000040456|EPlOSAG0…
chr01	23418794	TATTCAGCTTCCCAACTTTATTTCACGGTTGGCTCAGTGATGTCACGAGCTACCAGGCGAGTTACAAAATGTAC	T	977.78	0/0	0/0	0/0	0/0	1|1	0/0	0/0	0/0	0/0	0/0	0/0	0/0	1|1	0/0	0/0	0/0	0/0	0/0	0/0	0/0	0/0	0/0	0/0	0/0	T|upstream_gene_variant|MODIFIER|EPlOSAG00000036938|EPlOSAG00000036938|transcript|EPlOSAT00000038326|lincRNA||n.-2448_-2376delGTACATTTTGTAACTCGCCTGGTAGCTCGTGACATCACTGAGCCAACCGTGAAATAAAGTTGGGAAGCTGAAT|||||2376|,T|downstream_gene_variant|MODIFIER|EPlOSAG00000034858|EPlOSAG00000034858|transcript|EPlOSAT00000036246|lincRNA||n.*2376_*2448delATTCAGCTTCCCAACTTTATTTCACGGTTGGCTCAGTGATGTCACGAGCTACCAGGCGAGT…
chr01	23426124	GGCGGGCGGCCGGTGCGGCGGC	G	4630.29	./.	./.	0/0	./.	./.	./.	0/0	./.	./.	./.	0/0	0/0	./.	0/0	1/1	0/0	0/0	1/1	0/0	./.	./.	0/0	0/0	0/0	G|intergenic_region|MODIFIER|EPlOSAG00000034858-EPlOSAG00000019169|EPlOSAG00000034858-EPlOSAG00000019169|intergenic_region|EPlOSAG00000034858-EPlOSAG00000019169|||n.23426125_23426145delGCGGGCGGCCGGTGCGGCGGC||||||
chr01	23426162	AGGCGGCCTGCACGGTGGCGTGGCGGCGCG	A	6618.86	0/0	./.	0/0	./.	./.	./.	1|1	./.	./.	./.	1|1	1|1	./.	0/0	0/0	1|1	0/0	0/0	0/0	./.	./.	0/0	0/0	1|1	A|intergenic_region|MODIFIER|EPlOSAG00000034858-EPlOSAG00000019169|EPlOSAG00000034858-EPlOSAG00000019169|intergenic_region|EPlOSAG00000034858-EPlOSAG00000019169|||n.23426163_23426191delGGCGGCCTGCACGGTGGCGTGGCGGCGCG||||||
chr01	23433208	TCTCTCTGTCTCCGCTAACTTAACCCC	T	2340.79	0/0	0/0	0/0	0/0	1/1	0/0	0/0	0/0	0/0	0/0	0/0	0/0	1/1	0/0	0/0	0/0	0/0	0/0	0/0	0/0	0/0	0/0	0/0	0/0	T|downstream_gene_variant|MODIFIER|EPlOSAG00000019169|EPlOSAG00000019169|transcript|EPlOSAT00000020557|lincRNA||n.*2708_*2733delGGGGTTAAGTTAGCGGAGACAGAGAG|||||2733|,T|downstream_gene_variant|MODIFIER|EPlOSAG00000029120|EPlOSAG00000029120|transcript|EPlOSAT00000030508|lincRNA||n.*2885_*2910delGGGGTTAAGTTAGCGGAGACAGAGAG|||||2910|,T|intergenic_region|MODIFIER|EPlOSAG00000034858-EPlOSAG00000019169|EP…
chr01	23433370	AAATCCTTCCCCCGTGCTCTCC	A	3005.79	0/0	0/0	0/0	0/0	1|1	0/0	0/0	0/0	0/0	0/0	0/0	0/0	1|1	0/0	0/0	0/0	0/0	0/0	0/0	0/0	0/0	0/0	0/0	0/0	A|downstream_gene_variant|MODIFIER|EPlOSAG00000019169|EPlOSAG00000019169|transcript|EPlOSAT00000020557|lincRNA||n.*2551_*2571delGGAGAGCACGGGGGAAGGATT|||||2571|,A|downstream_gene_variant|MODIFIER|EPlOSAG00000029120|EPlOSAG00000029120|transcript|EPlOSAT00000030508|lincRNA||n.*2728_*2748delGGAGAGCACGGGGGAAGGATT|||||2748|,A|intergenic_region|MODIFIER|EPlOSAG00000034858-EPlOSAG00000019169|EPlOSAG00000…
chr01	23433456	C	CTCTCTCCGCCGCCGTCGCCAACTCCAGCCGCGTT	2157.84	0/0	0/0	0/0	0/0	1|1	0/0	0/0	0/0	0/0	0/0	0/0	0/0	1|1	0/0	0/0	0/0	0/0	0/0	0/0	0/0	0/0	0/0	0/0	0/0	CTCTCTCCGCCGCCGTCGCCAACTCCAGCCGCGTT|downstream_gene_variant|MODIFIER|EPlOSAG00000019169|EPlOSAG00000019169|transcript|EPlOSAT00000020557|lincRNA||n.*2485_*2486insAACGCGGCTGGAGTTGGCGACGGCGGCGGAGAGA|||||2485|,CTCTCTCCGCCGCCGTCGCCAACTCCAGCCGCGTT|downstream_gene_variant|MODIFIER|EPlOSAG00000029120|EPlOSAG00000029120|transcript|EPlOSAT00000030508|lincRNA||n.*2662_*2663insAACGCGGCTGGAGTTGGCGACGGCGGCGGA…
chr01	23433619	CCTCAGTCGCGCCTCCAGCCGCACCTCACCTCCGCCCTAG	C	2158.79	0/0	0/0	0/0	0/0	1/1	0/0	0/0	0/0	0/0	0/0	0/0	0/0	1/1	0/0	0/0	0/0	0/0	0/0	0/0	0/0	0/0	0/0	0/0	0/0	C|downstream_gene_variant|MODIFIER|EPlOSAG00000019169|EPlOSAG00000019169|transcript|EPlOSAT00000020557|lincRNA||n.*2284_*2322delCTAGGGCGGAGGTGAGGTGCGGCTGGAGGCGCGACTGAG|||||2322|,C|downstream_gene_variant|MODIFIER|EPlOSAG00000029120|EPlOSAG00000029120|transcript|EPlOSAT00000030508|lincRNA||n.*2461_*2499delCTAGGGCGGAGGTGAGGTGCGGCTGGAGGCGCGACTGAG|||||2499|,C|intergenic_region|MODIFIER|EPlOSAG0000003…
chr01	23434196	T	TGCCGCTTGCCGCACCGTTCGACGTCGCCGCTCATCGCCGGTGTCGTCGCCGTCGGCCGTCCGGCAGCGCGC	2353.83	0/0	0/0	0/0	0/0	1|1	0/0	0/0	0/0	0/0	0/0	0/0	0/0	1|1	0/0	0/0	0/0	0/0	0/0	0/0	0/0	0/0	0/0	0/0	0/0	TGCCGCTTGCCGCACCGTTCGACGTCGCCGCTCATCGCCGGTGTCGTCGCCGTCGGCCGTCCGGCAGCGCGC|downstream_gene_variant|MODIFIER|EPlOSAG00000019169|EPlOSAG00000019169|transcript|EPlOSAT00000020557|lincRNA||n.*1745_*1746insGCGCGCTGCCGGACGGCCGACGGCGACGACACCGGCGATGAGCGGCGACGTCGAACGGTGCGGCAAGCGGC|||||1745|,TGCCGCTTGCCGCACCGTTCGACGTCGCCGCTCATCGCCGGTGTCGTCGCCGTCGGCCGTCCGGCAGCGCGC|downstream_gene_variant|MODIFIER|EPlOSAG00000…
chr01	23439410	G	GCATATCCTCAAGATATCTCCACA	5839.83	0/0	0/0	0/0	0/0	1|1	0/0	0/0	0/0	0/0	0/0	0/0	0/0	1|1	0/0	0/0	0/0	0/0	0/0	0/0	0/0	0/0	0/0	0/0	0/0	GCATATCCTCAAGATATCTCCACA|upstream_gene_variant|MODIFIER|EPlOSAG00000019169|EPlOSAG00000019169|transcript|EPlOSAT00000020557|lincRNA||n.-3307_-3306insTGTGGAGATATCTTGAGGATATG|||||3307|,GCATATCCTCAAGATATCTCCACA|upstream_gene_variant|MODIFIER|EPlOSAG00000029120|EPlOSAG00000029120|transcript|EPlOSAT00000030508|lincRNA||n.-3207_-3206insTGTGGAGATATCTTGAGGATATG|||||3207|,GCATATCCTCAAGATATCTCCACA|upstream…
chr01	23441635	T	TTTGAAATTACTTAAGTTAAAA	12011.4	1|1	0/0	0/0	0/0	0/0	0/0	0/0	0/0	0/0	0/0	0/0	0/0	0/0	0/0	1|1	0/0	0/0	1|1	0/0	0/0	1|1	0/0	0/0	0/0	TTTGAAATTACTTAAGTTAAAA|downstream_gene_variant|MODIFIER|OS01G0597400|OS01G0597400|transcript|OS01T0597400-00|protein_coding||c.*238_*239insTTGAAATTACTTAAGTTAAAA|||||239|,TTTGAAATTACTTAAGTTAAAA|downstream_gene_variant|MODIFIER|EPlOSAG00000025375|EPlOSAG00000025375|transcript|EPlOSAT00000026763|lincRNA||n.*4195_*4196insTTTTAACTTAAGTAATTTCAA|||||4195|,TTTGAAATTACTTAAGTTAAAA|intergenic_region|MODIFIE…
chr01	23442238	C	CACTACCGCCACCCTGTATCACCCCACGAATTTGTTGACCGGCACATCCTCCACCG	1716.41	1|1	0/0	0/0	0/0	./.	0/0	0/0	0/0	0/0	0/0	0/0	0/0	./.	0/0	./.	0/0	0/0	./.	0/0	0/0	1|1	0/0	0/0	0/0	CACTACCGCCACCCTGTATCACCCCACGAATTTGTTGACCGGCACATCCTCCACCG|upstream_gene_variant|MODIFIER|OS01G0597600|OS01G0597600|transcript|OS01T0597600-01|protein_coding||c.-5022_-5021insACTACCGCCACCCTGTATCACCCCACGAATTTGTTGACCGGCACATCCTCCACCG|||||4934|,CACTACCGCCACCCTGTATCACCCCACGAATTTGTTGACCGGCACATCCTCCACCG|downstream_gene_variant|MODIFIER|OS01G0597400|OS01G0597400|transcript|OS01T0597400-00|protein_coding||c…
chr01	23443762	GCTACGCATCTTCGCTAGCTGCAGAATGCCCCCCAAACCCTTTGCTAGCTGCAGAACGCCCATC	G	2111.44	0/0	0/0	0/0	0/0	1|1	0/0	0/0	0/0	0/0	0/0	0/0	0/0	1|1	0/0	0/0	0/0	0/0	0/0	0/0	0/0	0/0	0/0	0/0	0/0	G|upstream_gene_variant|MODIFIER|OS01G0597600|OS01G0597600|transcript|OS01T0597600-01|protein_coding||c.-3497_-3435delCTACGCATCTTCGCTAGCTGCAGAATGCCCCCCAAACCCTTTGCTAGCTGCAGAACGCCCATC|||||3410|,G|downstream_gene_variant|MODIFIER|OS01G0597400|OS01G0597400|transcript|OS01T0597400-00|protein_coding||c.*2366_*2428delCTACGCATCTTCGCTAGCTGCAGAATGCCCCCCAAACCCTTTGCTAGCTGCAGAACGCCCATC|||||2366|,G|downstream_…
chr01	23452452	T	TACGATGAACTTTGGGTGCGTTTA	547.47	./.	0/0	0/0	0/0	0/0	0/0	1/1	0/0	0/0	0/0	./.	./.	0/0	0/0	./.	./.	0/0	./.	0/0	0/0	./.	0/0	0/0	./.	TACGATGAACTTTGGGTGCGTTTA|upstream_gene_variant|MODIFIER|OS01G0597701|OS01G0597701|transcript|OS01T0597701-00|protein_coding||c.-1148_-1147insTAAACGCACCCAAAGTTCATCGT|||||1096|,TACGATGAACTTTGGGTGCGTTTA|upstream_gene_variant|MODIFIER|OS01G0597800|OS01G0597800|transcript|OS01T0597800-01|protein_coding||c.-3703_-3702insACGATGAACTTTGGGTGCGTTTA|||||3621|,TACGATGAACTTTGGGTGCGTTTA|downstream_gene_variant|…
chr01	23460644	GTCGAGATCCACCAAACCGTTCTCGAGTGA	G	9196.34	1/1	0/0	0/0	0/0	0/0	0/0	0/0	0/0	0/0	0/0	0/0	0/0	0/0	0/0	1/1	0/0	0/0	1/1	0/0	0/0	1/1	0/0	0/0	0/0	G|upstream_gene_variant|MODIFIER|OS01G0598000|OS01G0598000|transcript|OS01T0598000-00|protein_coding||c.-3710_-3682delTCGAGATCCACCAAACCGTTCTCGAGTGA|||||3592|WARNING_TRANSCRIPT_NO_START_CODON,G|downstream_gene_variant|MODIFIER|OS01G0597800|OS01G0597800|transcript|OS01T0597800-01|protein_coding||c.*2997_*3025delTCGAGATCCACCAAACCGTTCTCGAGTGA|||||2610|,G|intergenic_region|MODIFIER|OS01G0597800-OS01G0…
chr01	23464372	T	TTCCAGACCATGAGCGCCGCCGACGAGAGGAGC	29193.6	1/1	0/0	0/0	0/0	0/0	0/0	1|1	0/0	0/0	0/0	1|1	1|1	0/0	0/0	1|1	1|1	0/0	1|1	0/0	0/0	1|1	0/0	0/0	1|1	TTCCAGACCATGAGCGCCGCCGACGAGAGGAGC|frameshift_variant&stop_gained|HIGH|OS01G0598000|OS01G0598000|transcript|OS01T0598000-00|protein_coding|1/1|c.19_20insCCAGACCATGAGCGCCGCCGACGAGAGGAGCT|p.Tyr7fs|138/949|20/831|7/276||WARNING_TRANSCRIPT_NO_START_CODON&INFO_REALIGN_3_PRIME
chr01	23470860	G	GAGGGGTGGGGCAGGACGGGA	18834.6	1/1	0/0	0/0	0/0	0/0	0/0	1/1	0/0	0/0	0/0	1/1	1/1	0/0	0/0	1/1	1/1	0/0	1|1	0/0	0/0	1/1	0/0	0/0	1/1	GAGGGGTGGGGCAGGACGGGA|upstream_gene_variant|MODIFIER|EPlOSAG00000047833|EPlOSAG00000047833|transcript|EPlOSAT00000049221|lincRNA||n.-190_-189insTCCCGTCCTGCCCCACCCCT|||||190|,GAGGGGTGGGGCAGGACGGGA|downstream_gene_variant|MODIFIER|EPlOSAG00000003012|EPlOSAG00000003012|transcript|EPlOSAT00000004400|lincRNA||n.*4946_*4947insTCCCGTCCTGCCCCACCCCT|||||4946|,GAGGGGTGGGGCAGGACGGGA|intergenic_region|MODIFI…
chr01	23519542	A	ACTCCAACATCCAGTTCCATCATCTCAACAGTCAACAGAGATCCCAAACGTAGTGTACAATGGAGATTAT	199.92	./.	0/0	0/0	0/0	0/0	0/0	1/1	0/0	0/0	0/0	./.	./.	0/0	0/0	./.	./.	0/0	./.	0/0	0/0	./.	0/0	0/0	./.	ACTCCAACATCCAGTTCCATCATCTCAACAGTCAACAGAGATCCCAAACGTAGTGTACAATGGAGATTAT|upstream_gene_variant|MODIFIER|EPlOSAG00000034759|EPlOSAG00000034759|transcript|EPlOSAT00000036147|lincRNA||n.-933_-932insATAATCTCCATTGTACACTACGTTTGGGATCTCTGTTGACTGTTGAGATGATGGAACTGGATGTTGGAG|||||933|,ACTCCAACATCCAGTTCCATCATCTCAACAGTCAACAGAGATCCCAAACGTAGTGTACAATGGAGATTAT|downstream_gene_variant|MODIFIER|OS01G0598600|OS01G05986…
chr01	23521516	G	GCAATATAGGCTATAAAGCCACCCA	267.17	./.	0/0	0/0	0/0	0/0	0/0	./.	0/0	0/0	0/0	./.	./.	0/0	0/0	./.	./.	0/0	./.	0/0	0/0	1|1	0/0	0/0	./.	GCAATATAGGCTATAAAGCCACCCA|upstream_gene_variant|MODIFIER|EPlOSAG00000034759|EPlOSAG00000034759|transcript|EPlOSAT00000036147|lincRNA||n.-2907_-2906insTGGGTGGCTTTATAGCCTATATTG|||||2907|,GCAATATAGGCTATAAAGCCACCCA|downstream_gene_variant|MODIFIER|OS01G0598600|OS01G0598600|transcript|OS01T0598600-01|protein_coding||c.*4977_*4978insCAATATAGGCTATAAAGCCACCCA|||||4752|,GCAATATAGGCTATAAAGCCACCCA|downstrea…
chr01	23528951	T	TCCAGGTGTATTAAACCAACAATGACA	1715.51	./.	0/0	0/0	0/0	0/0	0/0	0/0	0/0	0/0	0/0	0/0	0/0	0/0	0/0	1/1	0/0	0/0	1|1	0/0	0/0	./.	0/0	0/0	0/0	TCCAGGTGTATTAAACCAACAATGACA|upstream_gene_variant|MODIFIER|EPlOSAG00000014131|EPlOSAG00000014131|transcript|EPlOSAT00000015519|lincRNA||n.-108_-107insCCAGGTGTATTAAACCAACAATGACA|||||107|,TCCAGGTGTATTAAACCAACAATGACA|downstream_gene_variant|MODIFIER|EPlOSAG00000000395|EPlOSAG00000000395|transcript|EPlOSAT00000001783|lincRNA||n.*813_*814insTGTCATTGTTGGTTTAATACACCTGG|||||813|,TCCAGGTGTATTAAACCAACAATGA…
chr01	23535182	GCCTCCCTCCTCCCCGACACTCCCCCCTCA	G	9801.56	1/1	0/0	0/0	0/0	0/0	0/0	1/1	0/0	0/0	0/0	1/1	1/1	0/0	0/0	1/1	1/1	0/0	1/1	0/0	0/0	1/1	0/0	0/0	1/1	G|upstream_gene_variant|MODIFIER|OS01G0598900|OS01G0598900|transcript|OS01T0598900-00|protein_coding||c.-2789_-2761delTGAGGGGGGAGTGTCGGGGAGGAGGGAGG|||||2761|WARNING_TRANSCRIPT_NO_START_CODON,G|intergenic_region|MODIFIER|OS01G0598900-OS01G0599550|OS01G0598900-OS01G0599550|intergenic_region|OS01G0598900-OS01G0599550|||n.23535183_23535211delCCTCCCTCCTCCCCGACACTCCCCCCTCA||||||
chr01	23540929	ACGCGCGCGACTTGGCCTCTTGG	A	10654.4	1/1	0/0	0/0	0/0	0/0	0/0	0/0	0/0	0/0	0/0	0/0	0/0	0/0	0/0	1/1	0/0	0/0	1/1	0/0	0/0	1/1	0/0	0/0	0/0	A|downstream_gene_variant|MODIFIER|OS01G0599550|OS01G0599550|transcript|OS01T0599550-00|protein_coding||c.*3160_*3181delCCAAGAGGCCAAGTCGCGCGCG|||||759|WARNING_TRANSCRIPT_NO_START_CODON,A|intergenic_region|MODIFIER|OS01G0598900-OS01G0599550|OS01G0598900-OS01G0599550|intergenic_region|OS01G0598900-OS01G0599550|||n.23540930_23540951delCGCGCGCGACTTGGCCTCTTGG||||||
chr01	23544487	C	CAGACTTTTTAAGTAAAAAATAG	11420.4	1/1	0/0	0/0	0/0	0/0	0/0	0/0	0/0	0/0	0/0	0/0	0/0	0/0	0/0	1/1	0/0	0/0	1/1	0/0	0/0	1/1	0/0	0/0	0/0	CAGACTTTTTAAGTAAAAAATAG|upstream_gene_variant|MODIFIER|OS01G0599550|OS01G0599550|transcript|OS01T0599550-00|protein_coding||c.-144_-143insCTATTTTTTACTTAAAAAGTCT|||||143|WARNING_TRANSCRIPT_NO_START_CODON,CAGACTTTTTAAGTAAAAAATAG|intergenic_region|MODIFIER|OS01G0599550-OS01G0599900|OS01G0599550-OS01G0599900|intergenic_region|OS01G0599550-OS01G0599900|||n.23544487_23544488insAGACTTTTTAAGTAAAAAATAG|||…
chr01	23580737	TAAAGCATAAAATGTGAACTCCGTGAGTCAG	T	11585.3	1|1	0/0	0/0	0/0	0/0	0/0	0/0	0/0	0/0	0/0	0/0	0/0	0/0	0/0	1|1	0/0	0/0	1|1	0/0	0/0	1|1	0/0	0/0	0/0	T|upstream_gene_variant|MODIFIER|EPlOSAG00000021932|EPlOSAG00000021932|transcript|EPlOSAT00000023320|lincRNA||n.-2156_-2127delCTGACTCACGGAGTTCACATTTTATGCTTT|||||2127|,T|upstream_gene_variant|MODIFIER|EPlOSAG00000027635|EPlOSAG00000027635|transcript|EPlOSAT00000029023|lincRNA||n.-98_-69delAAAGCATAAAATGTGAACTCCGTGAGTCAG|||||98|,T|upstream_gene_variant|MODIFIER|OS01G0600400|OS01G0600400|transcript|O…
chr01	23580846	CTCTGTCCCATAAAAATCTAACATAATACTTGATAT	C	18131.6	1|1	0/0	0/0	0/0	0/0	0/0	1/1	0/0	0/0	0/0	1/1	1/1	0/0	0/0	1|1	1/1	0/0	1|1	0/0	0/0	1|1	0/0	0/0	1/1	C|upstream_gene_variant|MODIFIER|EPlOSAG00000021932|EPlOSAG00000021932|transcript|EPlOSAT00000023320|lincRNA||n.-2270_-2236delATATCAAGTATTATGTTAGATTTTTATGGGACAGA|||||2236|,C|upstream_gene_variant|MODIFIER|OS01G0600400|OS01G0600400|transcript|OS01T0600400-01|protein_coding||c.-1777_-1743delTCTGTCCCATAAAAATCTAACATAATACTTGATAT|||||1777|WARNING_TRANSCRIPT_NO_START_CODON,C|downstream_gene_variant|MODI…
chr01	23589578	G	GTTACGAAGATATCTCCTATACAGTGTCTCTCC,GTTACGAAGATATCTCCTATACAGTGTCTCTTC	26023	1/1	0/0	0/0	0/0	0/0	0/0	2|2	0/0	0/0	0/0	2|2	2|2	0/0	0/0	1/1	2|2	0/0	1/1	0/0	0/0	1/1	0/0	0/0	2|2	GTTACGAAGATATCTCCTATACAGTGTCTCTCC|upstream_gene_variant|MODIFIER|OS01G0600500|OS01G0600500|transcript|OS01T0600500-01|protein_coding||c.-4015_-4014insGGAGAGACACTGTATAGGAGATATCTTCGTAA|||||3889|,GTTACGAAGATATCTCCTATACAGTGTCTCTTC|upstream_gene_variant|MODIFIER|OS01G0600500|OS01G0600500|transcript|OS01T0600500-01|protein_coding||c.-4015_-4014insGAAGAGACACTGTATAGGAGATATCTTCGTAA|||||3889|,GTTACGAAGATAT…
chr01	23643078	GAAGTTAGAAGGTAAAAAACCAGTTTTCCAT	G	7646.34	1|1	0/0	0/0	0/0	0/0	0/0	0/0	0/0	0/0	0/0	0/0	0/0	0/0	0/0	1|1	0/0	0/0	1|1	0/0	0/0	1|1	0/0	0/0	0/0	G|upstream_gene_variant|MODIFIER|OS01G0601675|OS01G0601675|transcript|OS01T0601675-01|protein_coding||c.-261_-232delATGGAAAACTGGTTTTTTACCTTCTAACTT|||||201|,G|upstream_gene_variant|MODIFIER|EPlOSAG00000012950|EPlOSAG00000012950|transcript|EPlOSAT00000014338|lincRNA||n.-201_-172delAAGTTAGAAGGTAAAAAACCAGTTTTCCAT|||||201|,G|upstream_gene_variant|MODIFIER|OS01G0601687|OS01G0601687|transcript|OS01T0601…
chr01	23644046	C	CTTCAGCAAATTTAACTATTT	3437.51	1|1	0/0	0/0	0/0	0/0	0/0	0/0	0/0	0/0	0/0	0/0	0/0	0/0	0/0	./.	0/0	0/0	./.	0/0	0/0	1|1	0/0	0/0	0/0	CTTCAGCAAATTTAACTATTT|upstream_gene_variant|MODIFIER|OS01G0601675|OS01G0601675|transcript|OS01T0601675-01|protein_coding||c.-1200_-1199insAAATAGTTAAATTTGCTGAA|||||1169|,CTTCAGCAAATTTAACTATTT|upstream_gene_variant|MODIFIER|OS01G0601687|OS01G0601687|transcript|OS01T0601687-00|lincRNA||n.-3633_-3632insTTCAGCAAATTTAACTATTT|||||3632|,CTTCAGCAAATTTAACTATTT|downstream_gene_variant|MODIFIER|OS01G0601651|…
chr01	23644049	C	CACTATTGGGATATGACAATTAACGATTTGGCA	3878.51	1|1	0/0	0/0	0/0	0/0	0/0	0/0	0/0	0/0	0/0	0/0	0/0	0/0	0/0	./.	0/0	0/0	./.	0/0	0/0	1/1	0/0	0/0	0/0	CACTATTGGGATATGACAATTAACGATTTGGCA|upstream_gene_variant|MODIFIER|OS01G0601675|OS01G0601675|transcript|OS01T0601675-01|protein_coding||c.-1203_-1202insTGCCAAATCGTTAATTGTCATATCCCAATAGT|||||1172|,CACTATTGGGATATGACAATTAACGATTTGGCA|upstream_gene_variant|MODIFIER|OS01G0601687|OS01G0601687|transcript|OS01T0601687-00|lincRNA||n.-3630_-3629insACTATTGGGATATGACAATTAACGATTTGGCA|||||3629|,CACTATTGGGATATGACAAT…
chr01	23644053	A	ACTGTGTATAACACGTGGGTTCTTATATGTCAATAATATATGGGTCTAGCGGCAAATAGTTAAAAGC	3602.51	1|1	0/0	0/0	0/0	0/0	0/0	0/0	0/0	0/0	0/0	0/0	0/0	0/0	0/0	./.	0/0	0/0	./.	0/0	0/0	1|1	0/0	0/0	0/0	ACTGTGTATAACACGTGGGTTCTTATATGTCAATAATATATGGGTCTAGCGGCAAATAGTTAAAAGC|upstream_gene_variant|MODIFIER|OS01G0601675|OS01G0601675|transcript|OS01T0601675-01|protein_coding||c.-1207_-1206insGCTTTTAACTATTTGCCGCTAGACCCATATATTATTGACATATAAGAACCCACGTGTTATACACAG|||||1176|,ACTGTGTATAACACGTGGGTTCTTATATGTCAATAATATATGGGTCTAGCGGCAAATAGTTAAAAGC|upstream_gene_variant|MODIFIER|OS01G0601687|OS01G0601687|transcript|OS…
chr01	23644609	T	TTTATCTTTGGTTTGATATTCCTCCA	1975.51	./.	0/0	0/0	0/0	0/0	0/0	0/0	0/0	0/0	0/0	0/0	0/0	0/0	0/0	1/1	0/0	0/0	1/1	0/0	0/0	./.	0/0	0/0	0/0	TTTATCTTTGGTTTGATATTCCTCCA|upstream_gene_variant|MODIFIER|OS01G0601675|OS01G0601675|transcript|OS01T0601675-01|protein_coding||c.-1763_-1762insTGGAGGAATATCAAACCAAAGATAA|||||1732|,TTTATCTTTGGTTTGATATTCCTCCA|upstream_gene_variant|MODIFIER|OS01G0601687|OS01G0601687|transcript|OS01T0601687-00|lincRNA||n.-3070_-3069insTTATCTTTGGTTTGATATTCCTCCA|||||3069|,TTTATCTTTGGTTTGATATTCCTCCA|downstream_gene_varia…
chr01	23655708	AGAGGAGGCGAGGAGGCATGGGAGAC	A	5854.34	1/1	0/0	0/0	0/0	0/0	0/0	0/0	0/0	0/0	0/0	0/0	0/0	0/0	0/0	1/1	0/0	0/0	1/1	0/0	0/0	1/1	0/0	0/0	0/0	A|upstream_gene_variant|MODIFIER|OS01G0601700|OS01G0601700|transcript|OS01T0601700-01|protein_coding||c.-5200_-5176delGTCTCCCATGCCTCCTCGCCTCCTC|||||4210|WARNING_TRANSCRIPT_NO_START_CODON,A|intergenic_region|MODIFIER|OS01G0601700-EPlOSAG00000018757|OS01G0601700-EPlOSAG00000018757|intergenic_region|OS01G0601700-EPlOSAG00000018757|||n.23655709_23655733delGAGGAGGCGAGGAGGCATGGGAGAC||||||
chr01	23660493	T	TATTGTCAAATACTTCTTTGATTATGTTCG	1672.13	./.	0/0	0/0	0/0	0/0	0/0	0/0	0/0	0/0	0/0	0/0	0/0	0/0	0/0	1/1	0/0	0/0	./.	0/0	0/0	./.	0/0	0/0	0/0	TATTGTCAAATACTTCTTTGATTATGTTCG|upstream_gene_variant|MODIFIER|OS01G0602075|OS01G0602075|transcript|OS01T0602075-00|lincRNA||n.-2687_-2686insATTGTCAAATACTTCTTTGATTATGTTCG|||||2686|,TATTGTCAAATACTTCTTTGATTATGTTCG|downstream_gene_variant|MODIFIER|EPlOSAG00000018757|EPlOSAG00000018757|transcript|EPlOSAT00000020145|lincRNA||n.*611_*612insCGAACATAATCAAAGAAGTATTTGACAAT|||||611|,TATTGTCAAATACTTCTTTGATTAT…
chr01	23660495	G	GTCAAATACTTCTTTGATTATGTTC	545.12	./.	0/0	0/0	0/0	0/0	0/0	0/0	0/0	0/0	0/0	0/0	0/0	0/0	0/0	./.	0/0	0/0	./.	0/0	0/0	1|1	0/0	0/0	0/0	GTCAAATACTTCTTTGATTATGTTC|upstream_gene_variant|MODIFIER|OS01G0602075|OS01G0602075|transcript|OS01T0602075-00|lincRNA||n.-2685_-2684insTCAAATACTTCTTTGATTATGTTC|||||2684|,GTCAAATACTTCTTTGATTATGTTC|downstream_gene_variant|MODIFIER|EPlOSAG00000018757|EPlOSAG00000018757|transcript|EPlOSAT00000020145|lincRNA||n.*609_*610insGAACATAATCAAAGAAGTATTTGA|||||609|,GTCAAATACTTCTTTGATTATGTTC|downstream_gene_var…
chr01	23661099	T	TAAGACCTATCTGGTAAGAATTTCA	13532.4	1|1	0/0	0/0	0/0	0/0	0/0	0/0	0/0	0/0	0/0	0/0	0/0	0/0	0/0	1|1	0/0	0/0	1|1	0/0	0/0	1|1	0/0	0/0	0/0	TAAGACCTATCTGGTAAGAATTTCA|upstream_gene_variant|MODIFIER|OS01G0602075|OS01G0602075|transcript|OS01T0602075-00|lincRNA||n.-2081_-2080insAAGACCTATCTGGTAAGAATTTCA|||||2080|,TAAGACCTATCTGGTAAGAATTTCA|downstream_gene_variant|MODIFIER|EPlOSAG00000018757|EPlOSAG00000018757|transcript|EPlOSAT00000020145|lincRNA||n.*5_*6insTGAAATTCTTACCAGATAGGTCTT|||||5|,TAAGACCTATCTGGTAAGAATTTCA|downstream_gene_variant|M…
chr01	23662293	AGGGAGGGACGGCCGTTGAGGCCGACGGGTAGAG	A	6939.34	1|1	0/0	0/0	0/0	0/0	0/0	0/0	0/0	0/0	0/0	0/0	0/0	0/0	0/0	1|1	0/0	0/0	1|1	0/0	0/0	1|1	0/0	0/0	0/0	A|upstream_gene_variant|MODIFIER|EPlOSAG00000018757|EPlOSAG00000018757|transcript|EPlOSAT00000020145|lincRNA||n.-1164_-1132delCTCTACCCGTCGGCCTCAACGGCCGTCCCTCCC|||||1132|,A|upstream_gene_variant|MODIFIER|OS01G0602075|OS01G0602075|transcript|OS01T0602075-00|lincRNA||n.-886_-854delGGGAGGGACGGCCGTTGAGGCCGACGGGTAGAG|||||886|,A|upstream_gene_variant|MODIFIER|EPlOSAG00000001196|EPlOSAG00000001196|transc…
chr01	23678926	T	TTTTTTTTTACTTTCTAGAAG	9422.37	1/1	0/0	0/0	0/0	0/0	0/0	0/0	0/0	0/0	0/0	0/0	0/0	0/0	0/0	1|1	0/0	0/0	1/1	0/0	0/0	1|1	0/0	0/0	0/0	TTTTTTTTTACTTTCTAGAAG|upstream_gene_variant|MODIFIER|OS01G0602400|OS01G0602400|transcript|OS01T0602400-01|protein_coding||c.-3058_-3057insCTTCTAGAAAGTAAAAAAAA|||||2967|,TTTTTTTTTACTTTCTAGAAG|upstream_gene_variant|MODIFIER|OS01G0602466|OS01G0602466|transcript|OS01T0602466-00|protein_coding||c.-5330_-5329insTTTTTTTTACTTTCTAGAAG|||||3488|,TTTTTTTTTACTTTCTAGAAG|downstream_gene_variant|MODIFIER|OS01G0…
chr01	23694070	G	GAAAAAACAGACCAATATTATTGGCCCTCCGTACCAAACCTTACTTTATGTGGTACATAACTAGCCATTTGTCTTATCTGAT	13691.4	1/1	0/0	0/0	0/0	0/0	0/0	0/0	0/0	0/0	0/0	0/0	0/0	0/0	0/0	1/1	0/0	0/0	1/1	0/0	0/0	1/1	0/0	0/0	0/0	GAAAAAACAGACCAATATTATTGGCCCTCCGTACCAAACCTTACTTTATGTGGTACATAACTAGCCATTTGTCTTATCTGAT|upstream_gene_variant|MODIFIER|OS01G0602600|OS01G0602600|transcript|OS01T0602600-00|protein_coding||c.-4778_-4777insATCAGATAAGACAAATGGCTAGTTATGTACCACATAAAGTAAGGTTTGGTACGGAGGGCCAATAATATTGGTCTGTTTTTT|||||4778|WARNING_TRANSCRIPT_NO_START_CODON,GAAAAAACAGACCAATATTATTGGCCCTCCGTACCAAACCTTACTTTATGTGGTACATAACTAGCCATTTGTCTT…
chr01	23705022	ATTTATTTCACACCTATTATGATGTGGAATTATTCTTCCT	A	6857.34	1|1	0/0	0/0	0/0	0/0	0/0	0/0	0/0	0/0	0/0	0/0	0/0	0/0	0/0	1|1	0/0	0/0	1|1	0/0	0/0	1|1	0/0	0/0	0/0	A|intergenic_region|MODIFIER|EPlOSAG00000008161-EPlOSAG00000050523|EPlOSAG00000008161-EPlOSAG00000050523|intergenic_region|EPlOSAG00000008161-EPlOSAG00000050523|||n.23705023_23705061delTTTATTTCACACCTATTATGATGTGGAATTATTCTTCCT||||||
chr01	23709167	T	TGACCGCCGGTGAGTTACCGGTTA	3287.37	1/1	0/0	0/0	0/0	0/0	0/0	0/0	0/0	0/0	0/0	0/0	0/0	0/0	0/0	1/1	0/0	0/0	1/1	0/0	0/0	1/1	0/0	0/0	0/0	TGACCGCCGGTGAGTTACCGGTTA|intergenic_region|MODIFIER|EPlOSAG00000008161-EPlOSAG00000050523|EPlOSAG00000008161-EPlOSAG00000050523|intergenic_region|EPlOSAG00000008161-EPlOSAG00000050523|||n.23709167_23709168insGACCGCCGGTGAGTTACCGGTTA||||||
chr01	23734081	TAGATAGTACATCGGCCAGTTGATCGATGGGAA	T	11041.3	1/1	0/0	0/0	0/0	0/0	0/0	0/0	0/0	0/0	0/0	0/0	0/0	0/0	0/0	1/1	0/0	0/0	1/1	0/0	0/0	1/1	0/0	0/0	0/0	T|downstream_gene_variant|MODIFIER|OS01G0602800|OS01G0602800|transcript|OS01T0602800-01|protein_coding||c.*1355_*1386delAGATAGTACATCGGCCAGTTGATCGATGGGAA|||||1029|,T|intergenic_region|MODIFIER|OS01G0602800-OS01G0603000|OS01G0602800-OS01G0603000|intergenic_region|OS01G0602800-OS01G0603000|||n.23734082_23734113delAGATAGTACATCGGCCAGTTGATCGATGGGAA||||||
chr01	23747723	TTAAAAGTTACTCCATCCGTTTCATAATG	T	9162.98	0/0	0/0	0/0	0/0	1/1	0/0	1/1	0/0	0/0	0/0	1/1	0/0	1/1	0/0	0/0	1/1	0/0	0/0	0/0	0/0	0/0	0/0	0/0	1/1	T|gene_fusion|HIGH|EPlOSAG00000031917&OS01G0603100|EPlOSAG00000031917&OS01G0603100|gene_variant|OS01G0603100|||n.23747724_23747751delTAAAAGTTACTCCATCCGTTTCATAATG||||||,T|bidirectional_gene_fusion|HIGH|EPlOSAG00000032704&OS01G0603100|EPlOSAG00000032704&OS01G0603100|gene_variant|OS01G0603100|||n.23747724_23747751delTAAAAGTTACTCCATCCGTTTCATAATG||||||
chr01	23752346	GGATCCCCTTCGACGCTGGTCAACATATGAC	G	5930.98	0/0	0/0	0/0	0/0	1/1	0/0	1/1	0/0	0/0	0/0	1/1	0/0	1/1	0/0	0/0	1/1	0/0	0/0	0/0	0/0	0/0	0/0	0/0	1/1	G|upstream_gene_variant|MODIFIER|EPlOSAG00000032704|EPlOSAG00000032704|transcript|EPlOSAT00000034092|lincRNA||n.-4537_-4508delGTCATATGTTGACCAGCGTCGAAGGGGATC|||||4508|,G|upstream_gene_variant|MODIFIER|OS01G0603200|OS01G0603200|transcript|OS01T0603200-01|protein_coding||c.-778_-749delGTCATATGTTGACCAGCGTCGAAGGGGATC|||||711|,G|upstream_gene_variant|MODIFIER|OS01G0603200|OS01G0603200|transcript|OS01T0…
chr01	23758894	T	TTGGTACTTTTTTTTAGAACATACTACC	13706.4	1|1	0/0	0/0	0/0	0/0	0/0	0/0	0/0	0/0	0/0	0/0	0/0	0/0	0/0	1|1	0/0	0/0	1|1	0/0	0/0	1|1	0/0	0/0	0/0	TTGGTACTTTTTTTTAGAACATACTACC|upstream_gene_variant|MODIFIER|OS01G0603300|OS01G0603300|transcript|OS01T0603300-01|protein_coding||c.-1677_-1676insTGGTACTTTTTTTTAGAACATACTACC|||||1452|,TTGGTACTTTTTTTTAGAACATACTACC|upstream_gene_variant|MODIFIER|OS01G0603300|OS01G0603300|transcript|OS01T0603300-02|protein_coding||c.-1767_-1766insTGGTACTTTTTTTTAGAACATACTACC|||||1685|,TTGGTACTTTTTTTTAGAACATACTACC|inte…
chr01	23764661	CGGGGAGGGGAGGGGGGGGGGGGAGCGCGGGTGAATATGCTTCG	C	3059.64	0/0	0/0	0/0	0/0	0/0	0/0	./.	0/0	0/0	./.	0/0	0/0	0/0	0/0	1|1	0/0	0/0	1|1	0/0	0/0	1|1	0/0	0/0	0/0	C|downstream_gene_variant|MODIFIER|OS01G0603300|OS01G0603300|transcript|OS01T0603300-01|protein_coding||c.*2634_*2676delGGGGAGGGGAGGGGGGGGGGGGAGCGCGGGTGAATATGCTTCG|||||2275|,C|downstream_gene_variant|MODIFIER|OS01G0603300|OS01G0603300|transcript|OS01T0603300-02|protein_coding||c.*2634_*2676delGGGGAGGGGAGGGGGGGGGGGGAGCGCGGGTGAATATGCTTCG|||||2369|,C|intergenic_region|MODIFIER|OS01G0603300-OS01G0603…
chr01	23771879	TTCACTCACAAGCCGAAAGGGGGGAG	T	3046.75	1|1	0/0	0/0	0/0	0/0	0/0	0/0	0/0	0/0	0/0	0/0	0/0	0/0	0/0	1|1	0/0	0/0	1|1	0/0	0/0	./.	0/0	0/0	0/0	T|upstream_gene_variant|MODIFIER|EPlOSAG00000038353|EPlOSAG00000038353|transcript|EPlOSAT00000039741|lincRNA||n.-1901_-1877delTCACTCACAAGCCGAAAGGGGGGAG|||||1901|,T|upstream_gene_variant|MODIFIER|OS01G0603800|OS01G0603800|transcript|OS01T0603800-01|protein_coding||c.-4622_-4598delTCACTCACAAGCCGAAAGGGGGGAG|||||4586|,T|downstream_gene_variant|MODIFIER|OS01G0603500|OS01G0603500|transcript|OS01T060350…
chr01	23771909	GAACGGTTACCTGGTAGTAGAAGAGGAGGTGGCGCAT	G	3087.4	1|1	0/0	0/0	0/0	0/0	0/0	0/0	0/0	0/0	0/0	0/0	0/0	0/0	0/0	1|1	0/0	0/0	1|1	0/0	0/0	1|1	0/0	0/0	0/0	G|upstream_gene_variant|MODIFIER|EPlOSAG00000038353|EPlOSAG00000038353|transcript|EPlOSAT00000039741|lincRNA||n.-1871_-1836delAACGGTTACCTGGTAGTAGAAGAGGAGGTGGCGCAT|||||1871|,G|upstream_gene_variant|MODIFIER|OS01G0603800|OS01G0603800|transcript|OS01T0603800-01|protein_coding||c.-4592_-4557delAACGGTTACCTGGTAGTAGAAGAGGAGGTGGCGCAT|||||4556|,G|downstream_gene_variant|MODIFIER|OS01G0603500|OS01G0603500|…
chr01	23777761	A	ATTGTCATGTACGGTCGCACATATACCAGGCGCGGGCGAGCACGTGATGTGCGCCGAGCAGCTGAACGCGCGGATCGCGCGCGCGACGAGCCAGCTCCCAGTGGCTAGAAAAGGAAGTT	2041.1	1|1	0/0	0/0	0/0	0/0	0/0	0/0	0/0	0/0	0/0	0/0	0/0	0/0	0/0	0/0	0/0	0/0	0/0	0/0	0/0	0/0	0/0	0/0	0/0	ATTGTCATGTACGGTCGCACATATACCAGGCGCGGGCGAGCACGTGATGTGCGCCGAGCAGCTGAACGCGCGGATCGCGCGCGCGACGAGCCAGCTCCCAGTGGCTAGAAAAGGAAGTT|frameshift_variant|HIGH|OS01G0603800|OS01G0603800|transcript|OS01T0603800-01|protein_coding|1/1|c.1260_1261insTTGTCATGTACGGTCGCACATATACCAGGCGCGGGCGAGCACGTGATGTGCGCCGAGCAGCTGAACGCGCGGATCGCGCGCGCGACGAGCCAGCTCCCAGTGGCTAGAAAAGGAAGTT|p.Ile421fs|1297/3282|1261/2166|421/721||,ATTGTCATG…
chr01	23782671	A	ACTTCATCCGAGTCAGATGGCGGCACGCTGCAGTGGG	726.68	0/0	0/0	0/0	0/0	./.	0/0	./.	0/0	0/0	0/0	./.	0/0	./.	0/0	0/0	./.	0/0	0/0	0/0	0/0	0/0	0/0	0/0	1|1	ACTTCATCCGAGTCAGATGGCGGCACGCTGCAGTGGG|3_prime_UTR_variant|MODIFIER|OS01G0604000|OS01G0604000|transcript|OS01T0604000-01|protein_coding|1/1|c.*530_*531insCCCACTGCAGCGTGCCGCCATCTGACTCGGATGAAG|||||530|,ACTTCATCCGAGTCAGATGGCGGCACGCTGCAGTGGG|upstream_gene_variant|MODIFIER|OS01G0603700|OS01G0603700|transcript|OS01T0603700-01|protein_coding||c.-2147_-2146insCCCACTGCAGCGTGCCGCCATCTGACTCGGATGAAG|||||1980|…
chr01	23782672	C	CTTCATCCGAGTCAGATGGCGG	200.48	0/0	0/0	0/0	0/0	./.	0/0	./.	0/0	0/0	0/0	./.	0/0	1|1	0/0	0/0	./.	0/0	0/0	0/0	0/0	0/0	0/0	0/0	./.	CTTCATCCGAGTCAGATGGCGG|3_prime_UTR_variant|MODIFIER|OS01G0604000|OS01G0604000|transcript|OS01T0604000-01|protein_coding|1/1|c.*529_*530insCCGCCATCTGACTCGGATGAA|||||529|,CTTCATCCGAGTCAGATGGCGG|upstream_gene_variant|MODIFIER|OS01G0603700|OS01G0603700|transcript|OS01T0603700-01|protein_coding||c.-2148_-2147insCCGCCATCTGACTCGGATGAA|||||1981|,CTTCATCCGAGTCAGATGGCGG|upstream_gene_variant|MODIFIER|EPlOS…
chr01	23782703	T	TACAAAAACAGTGGAAATTAGATCCCTCAGCG	11790.9	1|1	0/0	0/0	0/0	./.	0/0	./.	0/0	0/0	0/0	./.	0/0	./.	0/0	1|1	./.	0/0	1|1	0/0	0/0	1|1	0/0	0/0	./.	TACAAAAACAGTGGAAATTAGATCCCTCAGCG|3_prime_UTR_variant|MODIFIER|OS01G0604000|OS01G0604000|transcript|OS01T0604000-01|protein_coding|1/1|c.*498_*499insCGCTGAGGGATCTAATTTCCACTGTTTTTGT|||||498|,TACAAAAACAGTGGAAATTAGATCCCTCAGCG|upstream_gene_variant|MODIFIER|OS01G0603700|OS01G0603700|transcript|OS01T0603700-01|protein_coding||c.-2179_-2178insCGCTGAGGGATCTAATTTCCACTGTTTTTGT|||||2012|,TACAAAAACAGTGGAAATT…
chr01	23799937	GTTATAAGACTTTCTAGCAATACCCACATTCATATATGTGTTAATGAATCTAGACATATTATAAGTCTTATAATC	G	5864.34	1/1	0/0	0/0	0/0	0/0	0/0	0/0	0/0	0/0	0/0	0/0	0/0	0/0	0/0	1/1	0/0	0/0	1/1	0/0	0/0	1/1	0/0	0/0	0/0	G|upstream_gene_variant|MODIFIER|EPlOSAG00000029264|EPlOSAG00000029264|transcript|EPlOSAT00000030652|lincRNA||n.-597_-524delTTATAAGACTTTCTAGCAATACCCACATTCATATATGTGTTAATGAATCTAGACATATTATAAGTCTTATAATC|||||597|,G|non_coding_transcript_exon_variant|MODIFIER|EPlOSAG00000031338|EPlOSAG00000031338|transcript|EPlOSAT00000032726|lincRNA|1/1|n.23_96delTATAAGACTTTCTAGCAATACCCACATTCATATATGTGTTAATGAATCTAGACAT…
chr01	23806612	C	CAGGCCGCCGCCCGCCGAGCCCGCCGCCGTCGCGCCA	11566.2	1/1	0/0	0/0	0/0	1/1	0/0	1/1	0/0	0/0	0/0	1/1	0/0	1/1	0/0	1/1	1/1	0/0	1/1	0/0	0/0	1/1	0/0	0/0	1/1	CAGGCCGCCGCCCGCCGAGCCCGCCGCCGTCGCGCCA|downstream_gene_variant|MODIFIER|CML12|OS01G0604500|transcript|OS01T0604500-01|protein_coding||c.*4177_*4178insTGGCGCGACGGCGGCGGGCTCGGCGGGCGGCGGCCT|||||3871|,CAGGCCGCCGCCCGCCGAGCCCGCCGCCGTCGCGCCA|intergenic_region|MODIFIER|EPlOSAG00000029264-CML12|EPlOSAG00000029264-OS01G0604500|intergenic_region|EPlOSAG00000029264-OS01G0604500|||n.23806612_23806613insAGGCCGC…
chr01	23814199	GCCGACGCGTCGGAGCCCTCGGAGGCCGATCCCGCCGCTA	G	1157.36	./.	0/0	0/0	0/0	0/0	0/0	./.	0/0	0/0	0/0	./.	1/1	./.	0/0	0/0	0/0	0/0	0/0	0/0	0/0	./.	0/0	0/0	0/0	G|3_prime_UTR_variant|MODIFIER|OS01G0604600|OS01G0604600|transcript|OS01T0604600-01|protein_coding|1/1|c.*574_*612delGCTACCGACGCGTCGGAGCCCTCGGAGGCCGATCCCGCC|||||574|INFO_REALIGN_3_PRIME,G|upstream_gene_variant|MODIFIER|CML12|OS01G0604500|transcript|OS01T0604500-01|protein_coding||c.-2699_-2661delTAGCGGCGGGATCGGCCTCCGAGGGCTCCGACGCGTCGG|||||2643|,G|upstream_gene_variant|MODIFIER|OS01G0604550|OS01G0…
chr01	23814494	CGCGCCACCGCCTGTCTGCCACGCGCCGCGCCGCTAA	C	8746.34	1|1	0/0	0/0	0/0	0/0	0/0	0/0	0/0	0/0	0/0	0/0	0/0	0/0	0/0	1|1	0/0	0/0	1|1	0/0	0/0	1|1	0/0	0/0	0/0	C|3_prime_UTR_variant|MODIFIER|OS01G0604600|OS01G0604600|transcript|OS01T0604600-01|protein_coding|1/1|c.*800_*835delACCGCCTGTCTGCCACGCGCCGCGCCGCTAAGCGCC|||||800|INFO_REALIGN_3_PRIME,C|upstream_gene_variant|MODIFIER|CML12|OS01G0604500|transcript|OS01T0604500-01|protein_coding||c.-2991_-2956delTTAGCGGCGCGGCGCGTGGCAGACAGGCGGTGGCGC|||||2938|,C|upstream_gene_variant|MODIFIER|OS01G0604550|OS01G0604550…
chr01	23825665	TTGTTGTTTTTTCCATCCCTTTTTTAG	T	2261.36	0/0	0/0	0/0	0/0	1|1	0/0	1|1	0/0	0/0	0/0	./.	0/0	1|1	0/0	0/0	1|1	0/0	0/0	0/0	0/0	0/0	0/0	0/0	1|1	T|upstream_gene_variant|MODIFIER|EPlOSAG00000028127|EPlOSAG00000028127|transcript|EPlOSAT00000029515|lincRNA||n.-724_-699delCTAAAAAAGGGATGGAAAAAACAACA|||||699|,T|upstream_gene_variant|MODIFIER|OS01G0604900|OS01G0604900|transcript|OS01T0604900-01|protein_coding||c.-4270_-4245delTGTTGTTTTTTCCATCCCTTTTTTAG|||||4198|WARNING_TRANSCRIPT_NO_START_CODON,T|intergenic_region|MODIFIER|EPlOSAG00000028127-OS0…
chr01	23826396	ATGTGTGTGTGTGTGTGTGTGTGTGTGTGTGTGTGTGTGTC	A	287.47	./.	0/0	0/0	0/0	./.	0/0	./.	0/0	0/0	0/0	1/1	0/0	1/1	0/0	./.	./.	0/0	./.	0/0	0/0	./.	0/0	0/0	./.	A|upstream_gene_variant|MODIFIER|EPlOSAG00000028127|EPlOSAG00000028127|transcript|EPlOSAT00000029515|lincRNA||n.-1469_-1430delGACACACACACACACACACACACACACACACACACACACA|||||1430|,A|upstream_gene_variant|MODIFIER|OS01G0604900|OS01G0604900|transcript|OS01T0604900-01|protein_coding||c.-3539_-3500delTGTGTGTGTGTGTGTGTGTGTGTGTGTGTGTGTGTGTGTC|||||3467|WARNING_TRANSCRIPT_NO_START_CODON,A|intergenic_region|…
chr01	23871890	TGCTAGCCCTGTCGGCAGATGGGCCG	T	9091.34	1/1	0/0	0/0	0/0	0/0	0/0	0/0	0/0	0/0	0/0	0/0	0/0	0/0	0/0	1/1	0/0	0/0	1/1	0/0	0/0	1/1	0/0	0/0	0/0	T|upstream_gene_variant|MODIFIER|EPlOSAG00000004921|EPlOSAG00000004921|transcript|EPlOSAT00000006309|lincRNA||n.-1698_-1674delCGGCCCATCTGCCGACAGGGCTAGC|||||1674|,T|downstream_gene_variant|MODIFIER|SWEET6B|OS01G0605700|transcript|OS01T0605700-01|protein_coding||c.*4847_*4871delGCTAGCCCTGTCGGCAGATGGGCCG|||||4686|,T|intergenic_region|MODIFIER|EPlOSAG00000004921-SWEET6A|EPlOSAG00000004921-OS01G060600…
chr01	23902704	G	GATATATATATATATATATATATATAT,GATATATATATATAT	156.2	./.	0/0	0/0	0/0	./.	1/1	0/0	0/0	./.	0/0	0/0	0/0	0/0	0/0	0/0	0/0	0/0	0/0	0/0	./.	2/2	0/0	0/0	0/0	GATATATATATATAT|upstream_gene_variant|MODIFIER|EPlOSAG00000040000|EPlOSAG00000040000|transcript|EPlOSAT00000041388|lincRNA||n.-2216_-2215insATATATATATATAT|||||2216|,GATATATATATATATATATATATATAT|upstream_gene_variant|MODIFIER|EPlOSAG00000040000|EPlOSAG00000040000|transcript|EPlOSAT00000041388|lincRNA||n.-2216_-2215insATATATATATATATATATATATATAT|||||2216|,GATATATATATATAT|downstream_gene_variant|MODIF…
chr01	23922201	C	CAACATCCACTGTGGATCATAGGAGGCGAAATTGTGCAAACATACTGCA	7059.37	1/1	0/0	0/0	0/0	0/0	0/0	0/0	0/0	0/0	0/0	0/0	0/0	0/0	0/0	1/1	0/0	0/0	1/1	0/0	0/0	1/1	0/0	0/0	0/0	CAACATCCACTGTGGATCATAGGAGGCGAAATTGTGCAAACATACTGCA|upstream_gene_variant|MODIFIER|BAT1|OS01G0607200|transcript|OS01T0607200-01|protein_coding||c.-1598_-1597insAACATCCACTGTGGATCATAGGAGGCGAAATTGTGCAAACATACTGCA|||||1516|,CAACATCCACTGTGGATCATAGGAGGCGAAATTGTGCAAACATACTGCA|downstream_gene_variant|MODIFIER|EPlOSAG00000018759|EPlOSAG00000018759|transcript|EPlOSAT00000020147|lincRNA||n.*3116_*3117insAACATC…
chr01	23984948	G	GCAACGCGATAAAAAAAATGATAAATAGCTGCTGTGGA	1533.74	0/0	0/0	0/0	0/0	1|1	0/0	0/0	0/0	0/0	0/0	0/0	0/0	./.	0/0	0/0	0/0	0/0	0/0	0/0	0/0	0/0	0/0	0/0	0/0	GCAACGCGATAAAAAAAATGATAAATAGCTGCTGTGGA|upstream_gene_variant|MODIFIER|OS01G0607900|OS01G0607900|transcript|OS01T0607900-01|protein_coding||c.-3162_-3161insTCCACAGCAGCTATTTATCATTTTTTTTATCGCGTTG|||||3048|,GCAACGCGATAAAAAAAATGATAAATAGCTGCTGTGGA|downstream_gene_variant|MODIFIER|EPlOSAG00000023274|EPlOSAG00000023274|transcript|EPlOSAT00000024662|lincRNA||n.*1506_*1507insTCCACAGCAGCTATTTATCATTTTTTTTATC…
chr01	23984953	G	GGCATTATTTAACTAAATCAAGAGGAA	646.74	0/0	0/0	0/0	0/0	1|1	0/0	0/0	0/0	0/0	0/0	0/0	0/0	./.	0/0	0/0	0/0	0/0	0/0	0/0	0/0	0/0	0/0	0/0	0/0	GGCATTATTTAACTAAATCAAGAGGAA|upstream_gene_variant|MODIFIER|OS01G0607900|OS01G0607900|transcript|OS01T0607900-01|protein_coding||c.-3167_-3166insTTCCTCTTGATTTAGTTAAATAATGC|||||3053|,GGCATTATTTAACTAAATCAAGAGGAA|downstream_gene_variant|MODIFIER|EPlOSAG00000023274|EPlOSAG00000023274|transcript|EPlOSAT00000024662|lincRNA||n.*1501_*1502insTTCCTCTTGATTTAGTTAAATAATGC|||||1501|,GGCATTATTTAACTAAATCAAGAGGAA…
chr01	23986619	GCGCTGCAACTGCTGTTATTACAACCGCTGTAACTA	G	2208.79	0/0	0/0	0/0	0/0	1/1	0/0	0/0	0/0	0/0	0/0	0/0	0/0	1/1	0/0	0/0	0/0	0/0	0/0	0/0	0/0	0/0	0/0	0/0	0/0	G|upstream_gene_variant|MODIFIER|OS01G0607900|OS01G0607900|transcript|OS01T0607900-01|protein_coding||c.-4867_-4833delTAGTTACAGCGGTTGTAATAACAGCAGTTGCAGCG|||||4719|,G|upstream_gene_variant|MODIFIER|EPlOSAG00000023274|EPlOSAG00000023274|transcript|EPlOSAT00000024662|lincRNA||n.-166_-132delTAGTTACAGCGGTTGTAATAACAGCAGTTGCAGCG|||||132|,G|intergenic_region|MODIFIER|EPlOSAG00000023274-EPlOSAG00000041754…
chr01	24008175	GAAAAATGTCGGTTCTTAAAATAAAATCAATCTCTTTCACCAA	G	9043.34	1|1	0/0	0/0	0/0	0/0	0/0	0/0	0/0	0/0	0/0	0/0	0/0	0/0	0/0	1|1	0/0	0/0	1|1	0/0	0/0	1|1	0/0	0/0	0/0	G|upstream_gene_variant|MODIFIER|OS01G0608000|OS01G0608000|transcript|OS01T0608000-01|protein_coding||c.-3980_-3939delTTGGTGAAAGAGATTGATTTTATTTTAAGAACCGACATTTTT|||||1543|WARNING_TRANSCRIPT_NO_START_CODON,G|upstream_gene_variant|MODIFIER|EPlOSAG00000006117|EPlOSAG00000006117|transcript|EPlOSAT00000007505|lincRNA||n.-3439_-3398delAAAAATGTCGGTTCTTAAAATAAAATCAATCTCTTTCACCAA|||||3439|,G|downstream_gen…
chr01	24011866	CGTGGCGGATGTAGGCGAGGGCGGCGGCCCGCACCGACGGCGACG	C	7185.34	1/1	0/0	0/0	0/0	0/0	0/0	0/0	0/0	0/0	0/0	0/0	0/0	0/0	0/0	1/1	0/0	0/0	1/1	0/0	0/0	1/1	0/0	0/0	0/0	C|upstream_gene_variant|MODIFIER|EPlOSAG00000006448|EPlOSAG00000006448|transcript|EPlOSAT00000007836|lincRNA||n.-214_-171delCGTCGCCGTCGGTGCGGGCCGCCGCCCTCGCCTACATCCGCCAC|||||171|,C|upstream_gene_variant|MODIFIER|EPlOSAG00000021445|EPlOSAG00000021445|transcript|EPlOSAT00000022833|lincRNA||n.-5043_-5000delGTGGCGGATGTAGGCGAGGGCGGCGGCCCGCACCGACGGCGACG|||||5043|,C|downstream_gene_variant|MODIFIER|EPlOS…
chr01	24012660	GTCACATCGGCCTGTTTAGTTCGCGAAAAGAAAATTTTTA	G	11358.6	1|1	0/0	0/0	0/0	0/0	0/0	0/0	0/0	0/0	0/0	0/0	0/0	0/0	0/0	1|1	0/0	0/0	.	0/0	0/0	1|1	0/0	0/0	0/0	G|upstream_gene_variant|MODIFIER|EPlOSAG00000006448|EPlOSAG00000006448|transcript|EPlOSAT00000007836|lincRNA||n.-1003_-965delTAAAAATTTTCTTTTCGCGAACTAAACAGGCCGATGTGA|||||965|,G|upstream_gene_variant|MODIFIER|EPlOSAG00000021445|EPlOSAG00000021445|transcript|EPlOSAT00000022833|lincRNA||n.-4249_-4211delTCACATCGGCCTGTTTAGTTCGCGAAAAGAAAATTTTTA|||||4249|,G|downstream_gene_variant|MODIFIER|EPlOSAG0000000…
chr01	24014786	TATAATAATAATAATAATAATA	T,TATAATAATAATAATAATA,TATA,TATAATAATAATAATAATAATAATAATAATAATA,TATAATA	19066.8	./.	3/3	1/1	3/3	2/2	3/3	2/2	3/3	3/3	0/0	2/2	4/4	2/2	3/3	0/0	2/2	5/5	0/0	3/3	3/3	./.	3/3	3/3	2/2	T|upstream_gene_variant|MODIFIER|EPlOSAG00000006448|EPlOSAG00000006448|transcript|EPlOSAT00000007836|lincRNA||n.-3111_-3091delTATTATTATTATTATTATTAT|||||3091|,TATA|upstream_gene_variant|MODIFIER|EPlOSAG00000006448|EPlOSAG00000006448|transcript|EPlOSAT00000007836|lincRNA||n.-3111_-3094delTATTATTATTATTATTAT|||||3094|,TATAATA|upstream_gene_variant|MODIFIER|EPlOSAG00000006448|EPlOSAG00000006448|transc…
chr01	24020711	C	CTTAGAAAAAATTAAAAGAAAATAAAAAAAA	772.13	./.	0/0	0/0	0/0	0/0	0/0	0/0	0/0	0/0	0/0	0/0	0/0	0/0	0/0	./.	0/0	0/0	1|1	0/0	0/0	./.	0/0	0/0	0/0	CTTAGAAAAAATTAAAAGAAAATAAAAAAAA|upstream_gene_variant|MODIFIER|OS01G0608200|OS01G0608200|transcript|OS01T0608200-00|protein_coding||c.-915_-914insTTTTTTTTATTTTCTTTTAATTTTTTCTAA|||||915|WARNING_TRANSCRIPT_NO_START_CODON,CTTAGAAAAAATTAAAAGAAAATAAAAAAAA|downstream_gene_variant|MODIFIER|EPlOSAG00000021445|EPlOSAG00000021445|transcript|EPlOSAT00000022833|lincRNA||n.*3767_*3768insTTAGAAAAAATTAAAAGAAAAT…
chr01	24026359	A	ATTATTCTTCTTCTTCTTCTTC	2248.49	0/0	0/0	0/0	0/0	0/0	0/0	./.	0/0	./.	0/0	./.	1/1	0/0	0/0	0/0	./.	0/0	0/0	0/0	0/0	./.	0/0	0/0	./.	ATTATTCTTCTTCTTCTTCTTC|intron_variant|MODIFIER|OS01G0608400|OS01G0608400|transcript|OS01T0608400-00|protein_coding|2/2|c.*200+247_*200+248insGAAGAAGAAGAAGAAGAATAA||||||
chr01	24059113	A	ACTCTGCAACTATACTCCTATACACCCCG	329.12	./.	0/0	0/0	0/0	0/0	0/0	0/0	0/0	0/0	0/0	0/0	0/0	0/0	0/0	./.	0/0	0/0	1/1	0/0	0/0	./.	0/0	0/0	0/0	ACTCTGCAACTATACTCCTATACACCCCG|upstream_gene_variant|MODIFIER|ABCG34|OS01G0609000|transcript|OS01T0609000-00|protein_coding||c.-3196_-3195insCGGGGTGTATAGGAGTATAGTTGCAGAG|||||3196|,ACTCTGCAACTATACTCCTATACACCCCG|intergenic_region|MODIFIER|ABCG34-ABCG35|OS01G0609000-OS01G0609200|intergenic_region|OS01G0609000-OS01G0609200|||n.24059113_24059114insCTCTGCAACTATACTCCTATACACCCCG||||||
chr01	24063797	T	TAGGAACTTCTTTCTCGGGATCATAAAACAGAGCGA	762.12	1|1	0/0	0/0	0/0	0/0	0/0	0/0	0/0	0/0	0/0	0/0	0/0	0/0	0/0	./.	0/0	0/0	./.	0/0	0/0	./.	0/0	0/0	0/0	TAGGAACTTCTTTCTCGGGATCATAAAACAGAGCGA|downstream_gene_variant|MODIFIER|ABCG35|OS01G0609200|transcript|OS01T0609200-00|protein_coding||c.*1409_*1410insTCGCTCTGTTTTATGATCCCGAGAAAGAAGTTCCT|||||1409|,TAGGAACTTCTTTCTCGGGATCATAAAACAGAGCGA|intergenic_region|MODIFIER|ABCG34-ABCG35|OS01G0609000-OS01G0609200|intergenic_region|OS01G0609000-OS01G0609200|||n.24063797_24063798insAGGAACTTCTTTCTCGGGATCATAAAACAGAG…
chr01	24063801	A	ATTATCGCGGGATTAATTATGTATTAACTTAAAAACTTAAAAAATATATTAATATAAATTTTTAAAG	582.11	1/1	0/0	0/0	0/0	0/0	0/0	0/0	0/0	0/0	0/0	0/0	0/0	0/0	0/0	./.	0/0	0/0	./.	0/0	0/0	./.	0/0	0/0	0/0	ATTATCGCGGGATTAATTATGTATTAACTTAAAAACTTAAAAAATATATTAATATAAATTTTTAAAG|downstream_gene_variant|MODIFIER|ABCG35|OS01G0609200|transcript|OS01T0609200-00|protein_coding||c.*1405_*1406insCTTTAAAAATTTATATTAATATATTTTTTAAGTTTTTAAGTTAATACATAATTAATCCCGCGATAA|||||1405|,ATTATCGCGGGATTAATTATGTATTAACTTAAAAACTTAAAAAATATATTAATATAAATTTTTAAAG|intergenic_region|MODIFIER|ABCG34-ABCG35|OS01G0609000-OS01G0609200|interge…
chr01	24067431	AGATTCAAAGTGAGTCAACTATTT	A	12745.3	1|1	0/0	0/0	0/0	0/0	0/0	0/0	0/0	0/0	0/0	0/0	0/0	0/0	0/0	1|1	0/0	0/0	1|1	0/0	0/0	1|1	0/0	0/0	0/0	A|upstream_gene_variant|MODIFIER|EPlOSAG00000001759|EPlOSAG00000001759|transcript|EPlOSAT00000003147|lincRNA||n.-4090_-4068delGATTCAAAGTGAGTCAACTATTT|||||4090|,A|downstream_gene_variant|MODIFIER|EPlOSAG00000001870|EPlOSAG00000001870|transcript|EPlOSAT00000003258|lincRNA||n.*4068_*4090delAAATAGTTGACTCACTTTGAATC|||||4090|,A|intron_variant|MODIFIER|ABCG35|OS01G0609200|transcript|OS01T0609200-00|prot…
chr01	24072256	GTAATATCACTCAAGAGCAAGGTATACAGTTTTTGGGACATGTCACC	G	6552.34	1/1	0/0	0/0	0/0	0/0	0/0	0/0	0/0	0/0	0/0	0/0	0/0	0/0	0/0	1/1	0/0	0/0	1/1	0/0	0/0	1/1	0/0	0/0	0/0	G|upstream_gene_variant|MODIFIER|EPlOSAG00000001870|EPlOSAG00000001870|transcript|EPlOSAT00000003258|lincRNA||n.-663_-618delGGTGACATGTCCCAAAAACTGTATACCTTGCTCTTGAGTGATATTA|||||618|,G|downstream_gene_variant|MODIFIER|EPlOSAG00000001759|EPlOSAG00000001759|transcript|EPlOSAT00000003147|lincRNA||n.*618_*663delTAATATCACTCAAGAGCAAGGTATACAGTTTTTGGGACATGTCACC|||||618|,G|downstream_gene_variant|MODIFIER|OS…
chr01	24082468	A	AGGCGTTTAAATTAATAATAATAATATTCTCGCATTCGATCGGGGAGAGGAGGGGGGT	8507.37	1/1	0/0	0/0	0/0	0/0	0/0	0/0	0/0	0/0	0/0	0/0	0/0	0/0	0/0	1/1	0/0	0/0	1/1	0/0	0/0	1/1	0/0	0/0	0/0	AGGCGTTTAAATTAATAATAATAATATTCTCGCATTCGATCGGGGAGAGGAGGGGGGT|upstream_gene_variant|MODIFIER|OS01G0609300|OS01G0609300|transcript|OS01T0609300-01|protein_coding||c.-1080_-1079insACCCCCCTCCTCTCCCCGATCGAATGCGAGAATATTATTATTATTAATTTAAACGCC|||||1080|WARNING_TRANSCRIPT_NO_START_CODON,AGGCGTTTAAATTAATAATAATAATATTCTCGCATTCGATCGGGGAGAGGAGGGGGGT|downstream_gene_variant|MODIFIER|OS01G0609501|OS01G0609501|trans…
chr01	24098522	T	TTAAGGTGGTAGAGACAAGGTGTAGG	1222.89	./.	0/0	0/0	0/0	0/0	0/0	0/0	0/0	0/0	0/0	0/0	0/0	0/0	0/0	1|1	0/0	0/0	1|1	0/0	0/0	./.	0/0	0/0	0/0	TTAAGGTGGTAGAGACAAGGTGTAGG|upstream_gene_variant|MODIFIER|OS01G0609700|OS01G0609700|transcript|OS01T0609700-01|protein_coding||c.-4854_-4853insTAAGGTGGTAGAGACAAGGTGTAGG|||||4219|,TTAAGGTGGTAGAGACAAGGTGTAGG|intergenic_region|MODIFIER|OS01G0609501-OS01G0609700|OS01G0609501-OS01G0609700|intergenic_region|OS01G0609501-OS01G0609700|||n.24098522_24098523insTAAGGTGGTAGAGACAAGGTGTAGG||||||
chr01	24101496	GAGCGTCTTGCTGTTGGGGCGGTGAGAGGAA	G	2295.33	1/1	0/0	0/0	0/0	0/0	0/0	0/0	0/0	0/0	0/0	0/0	0/0	0/0	0/0	1/1	0/0	0/0	1/1	0/0	0/0	1/1	0/0	0/0	0/0	G|upstream_gene_variant|MODIFIER|OS01G0609700|OS01G0609700|transcript|OS01T0609700-01|protein_coding||c.-1879_-1850delAGCGTCTTGCTGTTGGGGCGGTGAGAGGAA|||||1245|,G|intergenic_region|MODIFIER|OS01G0609501-OS01G0609700|OS01G0609501-OS01G0609700|intergenic_region|OS01G0609501-OS01G0609700|||n.24101497_24101526delAGCGTCTTGCTGTTGGGGCGGTGAGAGGAA||||||
chr01	24117737	G	GTGTTATATATTTAAAAACGGATGA	730.43	1/1	0/0	0/0	0/0	0/0	0/0	0/0	0/0	0/0	0/0	0/0	0/0	0/0	0/0	.	0/0	0/0	.	0/0	0/0	1/1	0/0	0/0	0/0	GTGTTATATATTTAAAAACGGATGA|upstream_gene_variant|MODIFIER|OS01G0609900|OS01G0609900|transcript|OS01T0609900-02|protein_coding||c.-2760_-2759insTCATCCGTTTTTAAATATATAACA|||||2760|WARNING_TRANSCRIPT_NO_START_CODON,GTGTTATATATTTAAAAACGGATGA|upstream_gene_variant|MODIFIER|OS01G0609900|OS01G0609900|transcript|OS01T0609900-01|protein_coding||c.-2574_-2573insTCATCCGTTTTTAAATATATAACA|||||2451|,GTGTTATATATT…
chr01	24142003	AATATATATATATATATATAT	A	7031.6	1/1	0/0	0/0	0/0	0/0	0/0	0/0	./.	./.	./.	./.	0/0	0/0	0/0	1/1	./.	0/0	1/1	0/0	./.	1/1	0/0	0/0	0/0	A|upstream_gene_variant|MODIFIER|OS01G0610400|OS01G0610400|transcript|OS01T0610400-01|protein_coding||c.-4006_-3987delATATATATATATATATATAT|||||3887|,A|downstream_gene_variant|MODIFIER|EPlOSAG00000002223|EPlOSAG00000002223|transcript|EPlOSAT00000003611|lincRNA||n.*1526_*1545delATATATATATATATATATAT|||||1545|,A|downstream_gene_variant|MODIFIER|EPlOSAG00000013285|EPlOSAG00000013285|transcript|EPlOSAT…
chr01	24144734	A	AAATCAGTGCACATGAGGTCCCTCGATGGTTTTGAC	12703.4	1/1	0/0	0/0	0/0	0/0	0/0	0/0	0/0	0/0	0/0	0/0	0/0	0/0	0/0	1/1	0/0	0/0	1/1	0/0	0/0	1/1	0/0	0/0	0/0	AAATCAGTGCACATGAGGTCCCTCGATGGTTTTGAC|upstream_gene_variant|MODIFIER|EPlOSAG00000002223|EPlOSAG00000002223|transcript|EPlOSAT00000003611|lincRNA||n.-1085_-1084insGTCAAAACCATCGAGGGACCTCATGTGCACTGATT|||||1085|,AAATCAGTGCACATGAGGTCCCTCGATGGTTTTGAC|upstream_gene_variant|MODIFIER|OS01G0610400|OS01G0610400|transcript|OS01T0610400-01|protein_coding||c.-1276_-1275insAATCAGTGCACATGAGGTCCCTCGATGGTTTTGAC||||…
chr01	24163592	C	CTTGCATCTGTACTTATCGTTTTTCGTGGCTCGTCAACTTCA	17256.9	1/1	0/0	0/0	0/0	0/0	0/0	0/0	0/0	0/0	0/0	0/0	1/1	0/0	0/0	1/1	0/0	0/0	1/1	0/0	0/0	1/1	0/0	0/0	0/0	CTTGCATCTGTACTTATCGTTTTTCGTGGCTCGTCAACTTCA|3_prime_UTR_variant|MODIFIER|OS01G0610700|OS01G0610700|transcript|OS01T0610700-01|protein_coding|6/6|c.*218_*219insTGAAGTTGACGAGCCACGAAAAACGATAAGTACAGATGCAA|||||218|,CTTGCATCTGTACTTATCGTTTTTCGTGGCTCGTCAACTTCA|upstream_gene_variant|MODIFIER|OS01G0610600|OS01G0610600|transcript|OS01T0610600-01|protein_coding||c.-1102_-1101insTGAAGTTGACGAGCCACGAAAAACGATAAGT…
chr01	24181334	C	CTATATTATATCTATCCTCTT	9542.37	1|1	0/0	0/0	0/0	0/0	0/0	0/0	0/0	0/0	0/0	0/0	0/0	0/0	0/0	1|1	0/0	0/0	1|1	0/0	0/0	1|1	0/0	0/0	0/0	CTATATTATATCTATCCTCTT|intron_variant|MODIFIER|OS01G0611000|OS01G0611000|transcript|OS01T0611000-01|protein_coding|1/1|c.76+32_76+33insTATATTATATCTATCCTCTT||||||,CTATATTATATCTATCCTCTT|intron_variant|MODIFIER|OS01G0611000|OS01G0611000|transcript|OS01T0611000-02|protein_coding|1/1|c.64+32_64+33insTATATTATATCTATCCTCTT||||||WARNING_TRANSCRIPT_NO_START_CODON
chr01	24191061	GGGCGGTGGCTAGGGTTGGCTCTTTACATAGCAAGGTGGAGATGAAATCT	G	10534.3	1|1	0/0	0/0	0/0	0/0	0/0	0/0	0/0	0/0	0/0	0/0	0/0	0/0	0/0	1|1	0/0	0/0	1|1	0/0	0/0	1|1	0/0	0/0	0/0	G|upstream_gene_variant|MODIFIER|OS01G0611050|OS01G0611050|transcript|OS01T0611050-00|protein_coding||c.-2171_-2123delAGATTTCATCTCCACCTTGCTATGTAAAGAGCCAACCCTAGCCACCGCC|||||1461|WARNING_TRANSCRIPT_INCOMPLETE,G|upstream_gene_variant|MODIFIER|OS01G0611300|OS01G0611300|transcript|OS01T0611300-01|protein_coding||c.-5464_-5416delGGCGGTGGCTAGGGTTGGCTCTTTACATAGCAAGGTGGAGATGAAATCT|||||4442|WARNING_TRANSCR…
chr01	24191382	CTTTAACTTATATTTCTACATA	C	9659.34	1/1	0/0	0/0	0/0	0/0	0/0	0/0	0/0	0/0	0/0	0/0	0/0	0/0	0/0	1/1	0/0	0/0	1/1	0/0	0/0	1/1	0/0	0/0	0/0	C|upstream_gene_variant|MODIFIER|OS01G0611050|OS01G0611050|transcript|OS01T0611050-00|protein_coding||c.-2464_-2444delTATGTAGAAATATAAGTTAAA|||||1782|WARNING_TRANSCRIPT_INCOMPLETE,C|upstream_gene_variant|MODIFIER|OS01G0611300|OS01G0611300|transcript|OS01T0611300-01|protein_coding||c.-5143_-5123delTTTAACTTATATTTCTACATA|||||4121|WARNING_TRANSCRIPT_INCOMPLETE,C|downstream_gene_variant|MODIFIER|RAN1|O…
chr01	24200150	G	GGGAATGTATTATGCCCCTTACA	11149.4	1/1	0/0	0/0	0/0	0/0	0/0	0/0	0/0	0/0	0/0	0/0	0/0	0/0	0/0	1/1	0/0	0/0	1/1	0/0	0/0	1/1	0/0	0/0	0/0	GGGAATGTATTATGCCCCTTACA|upstream_gene_variant|MODIFIER|EPlOSAG00000022811|EPlOSAG00000022811|transcript|EPlOSAT00000024199|lincRNA||n.-2775_-2774insTGTAAGGGGCATAATACATTCC|||||2775|,GGGAATGTATTATGCCCCTTACA|downstream_gene_variant|MODIFIER|OS01G0611300|OS01G0611300|transcript|OS01T0611300-01|protein_coding||c.*3534_*3535insGGAATGTATTATGCCCCTTACA|||||3535|WARNING_TRANSCRIPT_INCOMPLETE,GGGAATGTATTATG…
chr01	24204140	CAAAACTAGCCGTTGGGGGCGAAATCCCCCAACTCTGTGCTCTGCCGGTCCGACCGGAGGTATGTGGACGGTCAGACCGTGCTACTCTGCAACGGCTAG	C	3252.33	1/1	0/0	0/0	0/0	0/0	0/0	0/0	0/0	0/0	0/0	0/0	0/0	0/0	0/0	1/1	0/0	0/0	1/1	0/0	0/0	1/1	0/0	0/0	0/0	C|intergenic_region|MODIFIER|EPlOSAG00000022811-EPlOSAG00000027222|EPlOSAG00000022811-EPlOSAG00000027222|intergenic_region|EPlOSAG00000022811-EPlOSAG00000027222|||n.24204141_24204238delAAAACTAGCCGTTGGGGGCGAAATCCCCCAACTCTGTGCTCTGCCGGTCCGACCGGAGGTATGTGGACGGTCAGACCGTGCTACTCTGCAACGGCTAG||||||
chr01	24215389	TGTGGTCAGACCGGCTTGGAGCAA	T	13249.3	1|1	0/0	0/0	0/0	0/0	0/0	0/0	0/0	0/0	0/0	0/0	0/0	0/0	0/0	1|1	0/0	0/0	1|1	0/0	0/0	1|1	0/0	0/0	0/0	T|intergenic_region|MODIFIER|EPlOSAG00000022811-EPlOSAG00000027222|EPlOSAG00000022811-EPlOSAG00000027222|intergenic_region|EPlOSAG00000022811-EPlOSAG00000027222|||n.24215390_24215412delGTGGTCAGACCGGCTTGGAGCAA||||||
chr01	24217956	G	GAATTAAAAAACCAGATGAGAAAAACCAAAAGCGCACGGGTAAAAAACCGGCGTCAAAAT	8742.37	1/1	0/0	0/0	0/0	0/0	0/0	0/0	0/0	0/0	0/0	0/0	0/0	0/0	0/0	1/1	0/0	0/0	1/1	0/0	0/0	1/1	0/0	0/0	0/0	GAATTAAAAAACCAGATGAGAAAAACCAAAAGCGCACGGGTAAAAAACCGGCGTCAAAAT|intergenic_region|MODIFIER|EPlOSAG00000022811-EPlOSAG00000027222|EPlOSAG00000022811-EPlOSAG00000027222|intergenic_region|EPlOSAG00000022811-EPlOSAG00000027222|||n.24217956_24217957insAATTAAAAAACCAGATGAGAAAAACCAAAAGCGCACGGGTAAAAAACCGGCGTCAAAAT||||||
chr01	24218484	T	TGTCACGTCCTGATAAATTCATCC	1481.76	./.	0/0	0/0	0/0	0/0	0/0	0/0	0/0	0/0	0/0	0/0	0/0	0/0	0/0	1|1	0/0	0/0	./.	0/0	0/0	0/0	0/0	0/0	0/0	TGTCACGTCCTGATAAATTCATCC|intergenic_region|MODIFIER|EPlOSAG00000022811-EPlOSAG00000027222|EPlOSAG00000022811-EPlOSAG00000027222|intergenic_region|EPlOSAG00000022811-EPlOSAG00000027222|||n.24218484_24218485insGTCACGTCCTGATAAATTCATCC||||||
chr01	24221361	C	CAGATAGAAATCGGATTCTCTATCAGAT	8110.85	1/1	0/0	0/0	0/0	0/0	0/0	0/0	0/0	0/0	0/0	0/0	0/0	0/0	0/0	1/1	0/0	0/0	1/1	0/0	0/0	1/1	0/0	0/0	0/0	CAGATAGAAATCGGATTCTCTATCAGAT|upstream_gene_variant|MODIFIER|EPlOSAG00000029527|EPlOSAG00000029527|transcript|EPlOSAT00000030915|lincRNA||n.-3891_-3890insAGATAGAAATCGGATTCTCTATCAGAT|||||3890|,CAGATAGAAATCGGATTCTCTATCAGAT|downstream_gene_variant|MODIFIER|EPlOSAG00000027222|EPlOSAG00000027222|transcript|EPlOSAT00000028610|lincRNA||n.*3890_*3891insATCTGATAGAGAATCCGATTTCTATCT|||||3890|,CAGATAGAAATCGGA…
chr01	24222115	A	AAAAAAAATAGAGGTCAAATGTTTCAGTTGACTAATCGGACGTTCGATGTTGT	15485.4	1|1	0/0	0/0	0/0	0/0	0/0	0/0	0/0	0/0	0/0	0/0	0/0	0/0	0/0	1|1	0/0	0/0	1|1	0/0	0/0	1|1	0/0	0/0	0/0	AAAAAAAATAGAGGTCAAATGTTTCAGTTGACTAATCGGACGTTCGATGTTGT|upstream_gene_variant|MODIFIER|EPlOSAG00000029527|EPlOSAG00000029527|transcript|EPlOSAT00000030915|lincRNA||n.-3137_-3136insAAAAAAATAGAGGTCAAATGTTTCAGTTGACTAATCGGACGTTCGATGTTGT|||||3136|,AAAAAAAATAGAGGTCAAATGTTTCAGTTGACTAATCGGACGTTCGATGTTGT|downstream_gene_variant|MODIFIER|EPlOSAG00000027222|EPlOSAG00000027222|transcript|EPlOSAT00000028610|lin…
chr01	24238557	G	GGAAACTATATTTTCTTTTTATATTTAAATATAT	11109.4	1/1	0/0	0/0	0/0	0/0	0/0	0/0	0/0	0/0	0/0	0/0	0/0	0/0	0/0	1/1	0/0	0/0	1/1	0/0	0/0	1/1	0/0	0/0	0/0	GGAAACTATATTTTCTTTTTATATTTAAATATAT|downstream_gene_variant|MODIFIER|OS01G0611900|OS01G0611900|transcript|OS01T0611900-01|protein_coding||c.*4171_*4172insATATATTTAAATATAAAAAGAAAATATAGTTTC|||||1699|,GGAAACTATATTTTCTTTTTATATTTAAATATAT|downstream_gene_variant|MODIFIER|OS01G0611900|OS01G0611900|transcript|OS01T0611900-02|protein_coding||c.*4171_*4172insATATATTTAAATATAAAAAGAAAATATAGTTTC|||||3900|,GGAAA…
chr01	24270735	TCCCTGCTCCACTCACCTAGCTAGCTAGGGTGATCTGGCGAATGTTAGAG	T	6845.34	1/1	0/0	0/0	0/0	0/0	0/0	0/0	0/0	0/0	0/0	0/0	0/0	0/0	0/0	1/1	0/0	0/0	1/1	0/0	0/0	1/1	0/0	0/0	0/0	T|upstream_gene_variant|MODIFIER|OS01G0612350|OS01G0612350|transcript|OS01T0612350-01|protein_coding||c.-6816_-6768delCTCTAACATTCGCCAGATCACCCTAGCTAGCTAGGTGAGTGGAGCAGGG|||||3142|,T|upstream_gene_variant|MODIFIER|EPlOSAG00000035933|EPlOSAG00000035933|transcript|EPlOSAT00000037321|lincRNA||n.-791_-743delCTCTAACATTCGCCAGATCACCCTAGCTAGCTAGGTGAGTGGAGCAGGG|||||743|,T|upstream_gene_variant|MODIFIER|OS01G…
chr01	24276517	CCTAAATACACTAAAATTACATATGTAATTTAAACACTTACATAGGTAATTTTGAGACTTACATA	C	12027.3	1|1	0/0	0/0	0/0	0/0	0/0	0/0	0/0	0/0	0/0	0/0	0/0	0/0	0/0	1|1	0/0	0/0	1|1	0/0	0/0	1|1	0/0	0/0	0/0	C|upstream_gene_variant|MODIFIER|OS01G0612500|OS01G0612500|transcript|OS01T0612500-01|protein_coding||c.-702_-639delCTAAATACACTAAAATTACATATGTAATTTAAACACTTACATAGGTAATTTTGAGACTTACATA|||||577|,C|downstream_gene_variant|MODIFIER|OS01G0612425|OS01G0612425|transcript|OS01T0612425-00|protein_coding||c.*4760_*4823delCTAAATACACTAAAATTACATATGTAATTTAAACACTTACATAGGTAATTTTGAGACTTACATA|||||4169|,C|downstream_g…
chr01	24290109	C	CATAATCATGTCAAATCCAATGCTAGGTTGGTTTTTATTGG	6771.63	1/1	0/0	0/0	0/0	0/0	0/0	0/0	0/0	0/0	0/0	0/0	0/0	0/0	0/0	1|1	0/0	0/0	1|1	0/0	0/0	./.	0/0	0/0	0/0	CATAATCATGTCAAATCCAATGCTAGGTTGGTTTTTATTGG|upstream_gene_variant|MODIFIER|OS01G0612600|OS01G0612600|transcript|OS01T0612600-01|protein_coding||c.-5803_-5802insCCAATAAAAACCAACCTAGCATTGGATTTGACATGATTAT|||||4804|,CATAATCATGTCAAATCCAATGCTAGGTTGGTTTTTATTGG|upstream_gene_variant|MODIFIER|EPlOSAG00000022960|EPlOSAG00000022960|transcript|EPlOSAT00000024348|lincRNA||n.-310_-309insCCAATAAAAACCAACCTAGCATTGGA…
chr01	24290177	A	ACAACAGAAGTAACATGCTTTTGCTTGTATATGCATCAGCTGTAGTCTATAGGCTC	13289.4	1/1	0/0	0/0	0/0	0/0	0/0	0/0	0/0	0/0	0/0	0/0	0/0	0/0	0/0	1/1	0/0	0/0	1/1	0/0	0/0	1/1	0/0	0/0	0/0	ACAACAGAAGTAACATGCTTTTGCTTGTATATGCATCAGCTGTAGTCTATAGGCTC|upstream_gene_variant|MODIFIER|OS01G0612600|OS01G0612600|transcript|OS01T0612600-01|protein_coding||c.-5871_-5870insGAGCCTATAGACTACAGCTGATGCATATACAAGCAAAAGCATGTTACTTCTGTTG|||||4872|,ACAACAGAAGTAACATGCTTTTGCTTGTATATGCATCAGCTGTAGTCTATAGGCTC|upstream_gene_variant|MODIFIER|EPlOSAG00000022960|EPlOSAG00000022960|transcript|EPlOSAT00000024348|linc…
chr01	24306516	G	GTCTACCCGTATCTGCAAGTTGTGCGTC	7454.37	1/1	0/0	0/0	0/0	0/0	0/0	0/0	0/0	0/0	0/0	0/0	0/0	0/0	0/0	1/1	0/0	0/0	1/1	0/0	0/0	1/1	0/0	0/0	0/0	GTCTACCCGTATCTGCAAGTTGTGCGTC|upstream_gene_variant|MODIFIER|EPlOSAG00000029398|EPlOSAG00000029398|transcript|EPlOSAT00000030786|lincRNA||n.-4132_-4131insGACGCACAACTTGCAGATACGGGTAGA|||||4132|,GTCTACCCGTATCTGCAAGTTGTGCGTC|upstream_gene_variant|MODIFIER|EPlOSAG00000042672|EPlOSAG00000042672|transcript|EPlOSAT00000044060|lincRNA||n.-1807_-1806insGACGCACAACTTGCAGATACGGGTAGA|||||1807|,GTCTACCCGTATCTGCA…
chr01	24308361	G	GGGCGGCGGCGGCCGGGCGGGC	4230.62	0/0	0/0	0/0	0/0	0/0	0/0	0/0	0/0	0/0	0/0	0/0	0/0	0/0	0/0	1|1	0/0	0/0	1|1	0/0	0/0	0/0	0/0	0/0	0/0	GGGCGGCGGCGGCCGGGCGGGC|upstream_gene_variant|MODIFIER|EPlOSAG00000042672|EPlOSAG00000042672|transcript|EPlOSAT00000044060|lincRNA||n.-3652_-3651insGCCCGCCCGGCCGCCGCCGCC|||||3652|,GGGCGGCGGCGGCCGGGCGGGC|upstream_gene_variant|MODIFIER|EPlOSAG00000034864|EPlOSAG00000034864|transcript|EPlOSAT00000036252|lincRNA||n.-3162_-3161insGCCCGCCCGGCCGCCGCCGCC|||||3162|,GGGCGGCGGCGGCCGGGCGGGC|upstream_gene_vari…
chr01	24331147	TTATTGCTAATTATTCTCACTAATATGTTTG	T	8292.34	1|1	0/0	0/0	0/0	0/0	0/0	0/0	0/0	0/0	0/0	0/0	0/0	0/0	0/0	1|1	0/0	0/0	1|1	0/0	0/0	1|1	0/0	0/0	0/0	T|upstream_gene_variant|MODIFIER|EPlOSAG00000017322|EPlOSAG00000017322|transcript|EPlOSAT00000018710|lincRNA||n.-1897_-1868delCAAACATATTAGTGAGAATAATTAGCAATA|||||1868|,T|upstream_gene_variant|MODIFIER|OS01G0613100|OS01G0613100|transcript|OS01T0613100-00|protein_coding||c.-3232_-3203delTATTGCTAATTATTCTCACTAATATGTTTG|||||3215|,T|intergenic_region|MODIFIER|EPlOSAG00000017322-OS01G0613100|EPlOSAG00000…
chr01	24360441	AAGGCGGAGAGCACGGCCTCCACC	A	11785.3	1/1	0/0	0/0	0/0	0/0	0/0	0/0	0/0	0/0	0/0	0/0	0/0	0/0	0/0	1/1	0/0	0/0	1/1	0/0	0/0	1/1	0/0	0/0	0/0	A|5_prime_UTR_variant|MODIFIER|OS01G0613900|OS01G0613900|transcript|OS01T0613900-01|protein_coding|1/10|c.-35_-13delGGTGGAGGCCGTGCTCTCCGCCT|||||13|,A|5_prime_UTR_variant|MODIFIER|OS01G0613900|OS01G0613900|transcript|OS01T0613900-02|protein_coding|1/13|c.-36_-14delGGTGGAGGCCGTGCTCTCCGCCT|||||14|WARNING_TRANSCRIPT_NO_START_CODON,A|upstream_gene_variant|MODIFIER|OS01G0613900|OS01G0613900|transcript|…
chr01	24362827	CGCGCGCGCCGTACGTGCGTGCAACGTGCACGTCGCGTGACTCCGTTACTAT	C	5142.34	1/1	0/0	0/0	0/0	0/0	0/0	0/0	0/0	0/0	0/0	0/0	0/0	0/0	0/0	1/1	0/0	0/0	1/1	0/0	0/0	1/1	0/0	0/0	0/0	C|upstream_gene_variant|MODIFIER|OS01G0613900|OS01G0613900|transcript|OS01T0613900-03|protein_coding||c.-2449_-2399delATAGTAACGGAGTCACGCGACGTGCACGTTGCACGCACGTACGGCGCGCGC|||||2391|,C|upstream_gene_variant|MODIFIER|OS01G0614300|OS01G0614300|transcript|OS01T0614300-01|protein_coding||c.-1347_-1297delGCGCGCGCCGTACGTGCGTGCAACGTGCACGTCGCGTGACTCCGTTACTAT|||||1318|,C|upstream_gene_variant|MODIFIER|OS01G0…
chr01	24366270	GTGAATTGGGAAGTCAGGTTA	G	10412.3	1/1	0/0	0/0	0/0	0/0	0/0	0/0	0/0	0/0	0/0	0/0	0/0	0/0	0/0	1/1	0/0	0/0	1/1	0/0	0/0	1/1	0/0	0/0	0/0	G|upstream_gene_variant|MODIFIER|EPlOSAG00000052587|EPlOSAG00000052587|transcript|EPlOSAT00000000313|lincRNA||n.-2947_-2928delTAACCTGACTTCCCAATTCA|||||2928|,G|downstream_gene_variant|MODIFIER|OS01G0614400|OS01G0614400|transcript|OS01T0614400-01|protein_coding||c.*767_*786delTAACCTGACTTCCCAATTCA|||||431|,G|downstream_gene_variant|MODIFIER|OS01G0614500|OS01G0614500|transcript|OS01T0614500-01|protei…
chr01	24368921	T	TAAGTCCTCTAATCAAACAATATACATATCCCACTGACTATTATAACCTGAAGACAGATCA	31643.6	1/1	0/0	0/0	0/0	0/0	0/0	1/1	0/0	0/0	0/0	1/1	1/1	0/0	0/0	1/1	1/1	0/0	1/1	0/0	0/0	1/1	0/0	0/0	1/1	TAAGTCCTCTAATCAAACAATATACATATCCCACTGACTATTATAACCTGAAGACAGATCA|upstream_gene_variant|MODIFIER|OS01G0614400|OS01G0614400|transcript|OS01T0614400-01|protein_coding||c.-1452_-1451insTGATCTGTCTTCAGGTTATAATAGTCAGTGGGATATGTATATTGTTTGATTAGAGGACTT|||||1262|,TAAGTCCTCTAATCAAACAATATACATATCCCACTGACTATTATAACCTGAAGACAGATCA|upstream_gene_variant|MODIFIER|EPlOSAG00000002354|EPlOSAG00000002354|transcript|EPlOSAT0…
chr01	24378592	T	TTATTTACACCCATTTATCACTTCTGTCCTACTTATATACTTAGCACTCATTAAC	14147.4	1/1	0/0	0/0	0/0	0/0	0/0	0/0	0/0	0/0	0/0	0/0	0/0	0/0	0/0	1/1	0/0	0/0	1/1	0/0	0/0	1/1	0/0	0/0	0/0	TTATTTACACCCATTTATCACTTCTGTCCTACTTATATACTTAGCACTCATTAAC|3_prime_UTR_variant|MODIFIER|OS01G0614700|OS01G0614700|transcript|OS01T0614700-02|protein_coding|8/9|c.*127_*128insTACACCCATTTATCACTTCTGTCCTACTTATATACTTAGCACTCATTAACTATT|||||128|INFO_REALIGN_3_PRIME,TTATTTACACCCATTTATCACTTCTGTCCTACTTATATACTTAGCACTCATTAAC|upstream_gene_variant|MODIFIER|EPlOSAG00000012514|EPlOSAG00000012514|transcript|EPlOSAT0…
chr01	24408283	CATATATATATATATATATATATATATAT	C	1265.33	0/0	0/0	0/0	0/0	0/0	0/0	1/1	0/0	./.	./.	1/1	0/0	0/0	./.	0/0	0/0	./.	0/0	0/0	0/0	./.	0/0	./.	1/1	C|upstream_gene_variant|MODIFIER|EPlOSAG00000031298|EPlOSAG00000031298|transcript|EPlOSAT00000032686|lincRNA||n.-2952_-2925delATATATATATATATATATATATATATAT|||||2925|,C|downstream_gene_variant|MODIFIER|EPlOSAG00000033511|EPlOSAG00000033511|transcript|EPlOSAT00000034899|lincRNA||n.*2925_*2952delATATATATATATATATATATATATATAT|||||2925|,C|downstream_gene_variant|MODIFIER|OS01G0615500|OS01G0615500|transc…
chr01	24412499	T	TTTTAAGTTTAAACATGCTTAAAAAAACAGATCTGCAGCCGCTGATCCGGGAGCCCCACGTCTAAGCGAAGAAGCCCATACTCATG	15042.4	1/1	0/0	0/0	0/0	0/0	0/0	0/0	0/0	0/0	0/0	0/0	0/0	0/0	0/0	1/1	0/0	0/0	1/1	0/0	0/0	1/1	0/0	0/0	0/0	TTTTAAGTTTAAACATGCTTAAAAAAACAGATCTGCAGCCGCTGATCCGGGAGCCCCACGTCTAAGCGAAGAAGCCCATACTCATG|upstream_gene_variant|MODIFIER|OS01G0615500|OS01G0615500|transcript|OS01T0615500-00|protein_coding||c.-2190_-2189insCATGAGTATGGGCTTCTTCGCTTAGACGTGGGGCTCCCGGATCAGCGGCTGCAGATCTGTTTTTTTAAGCATGTTTAAACTTAAA|||||2190|,TTTTAAGTTTAAACATGCTTAAAAAAACAGATCTGCAGCCGCTGATCCGGGAGCCCCACGTCTAAGCGAAGAAGCCCATACTCATG|intergenic_re…
chr01	24417258	T	TAGTTCTGACTGAACGATGACGGATGAAG	11297.4	1|1	0/0	0/0	0/0	0/0	0/0	0/0	0/0	0/0	0/0	0/0	0/0	0/0	0/0	1|1	0/0	0/0	1|1	0/0	0/0	1|1	0/0	0/0	0/0	TAGTTCTGACTGAACGATGACGGATGAAG|upstream_gene_variant|MODIFIER|EPlOSAG00000008035|EPlOSAG00000008035|transcript|EPlOSAT00000009423|lincRNA||n.-273_-272insAGTTCTGACTGAACGATGACGGATGAAG|||||272|,TAGTTCTGACTGAACGATGACGGATGAAG|downstream_gene_variant|MODIFIER|OS01G0615850|OS01G0615850|transcript|OS01T0615850-01|protein_coding||c.*1386_*1387insCTTCATCCGTCATCGTTCAGTCAGAACT|||||1290|,TAGTTCTGACTGAACGATGACG…
chr01	24426049	GTTTTTGCCGCTCACGCCCCCGCCC	G	5386.4	1|1	0/0	0/0	0/0	0/0	0/0	0/0	0/0	0/0	0/0	0/0	0/0	0/0	0/0	1|1	0/0	0/0	1|1	0/0	0/0	1|1	0/0	0/0	0/0	G|upstream_gene_variant|MODIFIER|EPlOSAG00000052432|EPlOSAG00000052432|transcript|EPlOSAT00000000468|lincRNA||n.-4300_-4277delGGGCGGGGGCGTGAGCGGCAAAAA|||||4277|,G|upstream_gene_variant|MODIFIER|EPlOSAG00000000264|EPlOSAG00000000264|transcript|EPlOSAT00000001652|lincRNA||n.-2984_-2961delGGGCGGGGGCGTGAGCGGCAAAAA|||||2961|,G|upstream_gene_variant|MODIFIER|OS01G0616100|OS01G0616100|transcript|OS01T06…
chr01	24450187	AATAGAAGATAATAGATAGATAGATAG	A	8327.95	./.	0/0	0/0	0/0	0/0	0/0	0/0	0/0	0/0	0/0	0/0	0/0	0/0	0/0	1/1	0/0	0/0	1/1	0/0	0/0	./.	0/0	0/0	0/0	A|intergenic_region|MODIFIER|OS01G0616100-OS01G0616300|OS01G0616100-OS01G0616300|intergenic_region|OS01G0616100-OS01G0616300|||n.24450188_24450213delATAGAAGATAATAGATAGATAGATAG||||||
chr01	24504327	TACTTTTCAGTTTTCACCAAACCCAA	T	8927.34	1/1	0/0	0/0	0/0	0/0	0/0	0/0	0/0	0/0	0/0	0/0	0/0	0/0	0/0	1/1	0/0	0/0	1/1	0/0	0/0	1/1	0/0	0/0	0/0	T|upstream_gene_variant|MODIFIER|EPlOSAG00000022846|EPlOSAG00000022846|transcript|EPlOSAT00000024234|lincRNA||n.-1590_-1566delTTGGGTTTGGTGAAAACTGAAAAGT|||||1566|,T|upstream_gene_variant|MODIFIER|EPlOSAG00000028780|EPlOSAG00000028780|transcript|EPlOSAT00000030168|lincRNA||n.-3439_-3415delACTTTTCAGTTTTCACCAAACCCAA|||||3439|,T|downstream_gene_variant|MODIFIER|EPlOSAG00000003329|EPlOSAG00000003329|tr…
chr01	24506509	G	GCCCCCGATGCCATGTGGCCCTCCCCCGAGGGGAGTCAGGCCTGAGGTGGGGTGGCGGCCACTCCTTCCCCAAAGACTAGTCGGAGGAGGCTGC	13617.8	1|1	0/0	0/0	0/0	0/0	0/0	0/0	0/0	0/0	0/0	0/0	0/0	0/0	0/0	1|1	0/0	0/0	0/0	0/0	0/0	1|1	0/0	0/0	0/0	GCCCCCGATGCCATGTGGCCCTCCCCCGAGGGGAGTCAGGCCTGAGGTGGGGTGGCGGCCACTCCTTCCCCAAAGACTAGTCGGAGGAGGCTGC|upstream_gene_variant|MODIFIER|OS01G0616900|OS01G0616900|transcript|OS01T0616900-00|protein_coding||c.-1559_-1558insGCAGCCTCCTCCGACTAGTCTTTGGGGAAGGAGTGGCCGCCACCCCACCTCAGGCCTGACTCCCCTCGGGGGAGGGCCACATGGCATCGGGGG|||||1559|,GCCCCCGATGCCATGTGGCCCTCCCCCGAGGGGAGTCAGGCCTGAGGTGGGGTGGCGGCCACTCCTTCCCCAAAGACTAGTCGG…
chr01	24511203	C	CCATGCCTAGCCCAATAGAGAAAAAATAGTTTCAAGTGAGACTAAATGGTCCACGAA	11546.4	1|1	0/0	0/0	0/0	0/0	0/0	0/0	0/0	0/0	0/0	0/0	0/0	0/0	0/0	1|1	0/0	0/0	1|1	0/0	0/0	1|1	0/0	0/0	0/0	CCATGCCTAGCCCAATAGAGAAAAAATAGTTTCAAGTGAGACTAAATGGTCCACGAA|upstream_gene_variant|MODIFIER|EPlOSAG00000028043|EPlOSAG00000028043|transcript|EPlOSAT00000029431|lincRNA||n.-3289_-3288insTTCGTGGACCATTTAGTCTCACTTGAAACTATTTTTTCTCTATTGGGCTAGGCATG|||||3289|,CCATGCCTAGCCCAATAGAGAAAAAATAGTTTCAAGTGAGACTAAATGGTCCACGAA|upstream_gene_variant|MODIFIER|EPlOSAG00000023635|EPlOSAG00000023635|transcript|EPlOSAT00000…
chr01	24515720	A	ATTTTAAACGTTGGTTTTACCGGTTCTATAGCCGATATATATTGGTCGACACC	14433.4	1|1	0/0	0/0	0/0	0/0	0/0	0/0	0/0	0/0	0/0	0/0	0/0	0/0	0/0	1|1	0/0	0/0	1|1	0/0	0/0	1|1	0/0	0/0	0/0	ATTTTAAACGTTGGTTTTACCGGTTCTATAGCCGATATATATTGGTCGACACC|downstream_gene_variant|MODIFIER|EPlOSAG00000022092|EPlOSAG00000022092|transcript|EPlOSAT00000023480|lincRNA||n.*3178_*3179insGGTGTCGACCAATATATATCGGCTATAGAACCGGTAAAACCAACGTTTAAAA|||||3178|,ATTTTAAACGTTGGTTTTACCGGTTCTATAGCCGATATATATTGGTCGACACC|intergenic_region|MODIFIER|EPlOSAG00000023635-EPlOSAG00000022092|EPlOSAG00000023635-EPlOSAG00000022092…
chr01	24517953	C	CGACTAATATTATCAGCTGACTTTACACTTATTT	15158.4	1|1	0/0	0/0	0/0	0/0	0/0	0/0	0/0	0/0	0/0	0/0	0/0	0/0	0/0	1|1	0/0	0/0	1|1	0/0	0/0	1|1	0/0	0/0	0/0	CGACTAATATTATCAGCTGACTTTACACTTATTT|downstream_gene_variant|MODIFIER|EPlOSAG00000022092|EPlOSAG00000022092|transcript|EPlOSAT00000023480|lincRNA||n.*945_*946insAAATAAGTGTAAAGTCAGCTGATAATATTAGTC|||||945|,CGACTAATATTATCAGCTGACTTTACACTTATTT|intergenic_region|MODIFIER|EPlOSAG00000023635-EPlOSAG00000022092|EPlOSAG00000023635-EPlOSAG00000022092|intergenic_region|EPlOSAG00000023635-EPlOSAG00000022092|||n…
chr01	24527709	T	TAGATAATGACCACTGTTCAGTTGCAGTAACTAACCGTCCGTCTAACGGTAGATGCATGGCTAGTGGAATAATCCA	27406.6	1/1	0/0	0/0	0/0	1/1	0/0	1/1	0/0	0/0	0/0	0/0	1/1	1/1	0/0	1/1	1/1	0/0	1/1	0/0	0/0	1/1	0/0	0/0	0/0	TAGATAATGACCACTGTTCAGTTGCAGTAACTAACCGTCCGTCTAACGGTAGATGCATGGCTAGTGGAATAATCCA|intergenic_region|MODIFIER|EPlOSAG00000022092-OS01G0617500|EPlOSAG00000022092-OS01G0617500|intergenic_region|EPlOSAG00000022092-OS01G0617500|||n.24527709_24527710insAGATAATGACCACTGTTCAGTTGCAGTAACTAACCGTCCGTCTAACGGTAGATGCATGGCTAGTGGAATAATCCA||||||
chr01	24547058	AAATATTACCTTATGTGTGATTTATGTTTTTAATTTTTTTTAATAAAACAT	A	4687.35	1/1	0/0	0/0	0/0	0/0	0/0	0/0	0/0	0/0	0/0	0/0	0/0	0/0	0/0	1/1	0/0	0/0	1/1	0/0	0/0	1/1	0/0	0/0	0/0	A|upstream_gene_variant|MODIFIER|OS01G0617500|OS01G0617500|transcript|OS01T0617500-01|protein_coding||c.-524_-475delATGTTTTATTAAAAAAAATTAAAAACATAAATCACACATAAGGTAATATT|||||375|,A|upstream_gene_variant|MODIFIER|EPlOSAG00000017521|EPlOSAG00000017521|transcript|EPlOSAT00000018909|lincRNA||n.-4914_-4865delATGTTTTATTAAAAAAAATTAAAAACATAAATCACACATAAGGTAATATT|||||4865|,A|upstream_gene_variant|MODIFIER|EPl…
chr01	24554479	ATCTCCTCTTTCTCTTCTTCTTCGGTGAGTGAGGCCAGCGGCGG	A	4256.29	1|1	0/0	0/0	0/0	0/0	0/0	0/0	0/0	0/0	0/0	0/0	0/0	0/0	0/0	1|1	0/0	0/0	1/1	0/0	0/0	1|1	0/0	0/0	0/0	A|frameshift_variant|HIGH|OS01G0617650|OS01G0617650|transcript|OS01T0617650-00|protein_coding|1/1|c.762_804delCCGCCGCTGGCCTCACTCACCGAAGAAGAAGAGAAAGAGGAGA|p.Arg255fs|990/1149|762/963|254/320||WARNING_TRANSCRIPT_NO_START_CODON,A|upstream_gene_variant|MODIFIER|OS01G0617600|OS01G0617600|transcript|OS01T0617600-00|protein_coding||c.-400_-358delCCGCCGCTGGCCTCACTCACCGAAGAAGAAGAGAAAGAGGAGA|||||358|,A|ups…
chr01	24570944	A	AGTACATTCATTAATATCTATATAAAGGTGGAC	11719.4	1/1	0/0	0/0	0/0	0/0	0/0	0/0	0/0	0/0	0/0	0/0	0/0	0/0	0/0	1/1	0/0	0/0	1/1	0/0	0/0	1/1	0/0	0/0	0/0	AGTACATTCATTAATATCTATATAAAGGTGGAC|upstream_gene_variant|MODIFIER|EPlOSAG00000009054|EPlOSAG00000009054|transcript|EPlOSAT00000010442|lincRNA||n.-1433_-1432insGTCCACCTTTATATAGATATTAATGAATGTAC|||||1433|,AGTACATTCATTAATATCTATATAAAGGTGGAC|upstream_gene_variant|MODIFIER|EPlOSAG00000017522|EPlOSAG00000017522|transcript|EPlOSAT00000018910|lincRNA||n.-864_-863insGTCCACCTTTATATAGATATTAATGAATGTAC|||||864|,…
chr01	24578550	GTTGAAAGTTTTCAAATCTGGA	G	9654.88	0/0	0/0	0/0	0/0	1/1	0/0	0/0	0/0	0/0	0/0	1/1	1/1	1/1	0/0	0/0	0/0	0/0	0/0	0/0	0/0	0/0	0/0	0/0	1/1	G|upstream_gene_variant|MODIFIER|OS01G0617950|OS01G0617950|transcript|OS01T0617950-00|lincRNA||n.-3121_-3101delTCCAGATTTGAAAACTTTCAA|||||3101|,G|upstream_gene_variant|MODIFIER|OS01G0618000|OS01G0618000|transcript|OS01T0618000-01|protein_coding||c.-1801_-1781delTCCAGATTTGAAAACTTTCAA|||||1692|,G|downstream_gene_variant|MODIFIER|OS01G0617900|OS01G0617900|transcript|OS01T0617900-01|protein_coding||c.…
chr01	24584719	T	TGCTGCGGAGGCAGAGGCGGCG	5569.86	0/0	0/0	0/0	0/0	1/1	0/0	0/0	0/0	0/0	0/0	1/1	1/1	1/1	0/0	0/0	0/0	0/0	0/0	0/0	0/0	0/0	0/0	0/0	1/1	TGCTGCGGAGGCAGAGGCGGCG|disruptive_inframe_insertion|MODERATE|OS01G0618200|OS01G0618200|transcript|OS01T0618200-01|protein_coding|2/9|c.74_94dupAGGCAGAGGCGGCGGCTGCGG|p.Glu25_Ala31dup|290/1452|95/564|32/187||INFO_REALIGN_3_PRIME,TGCTGCGGAGGCAGAGGCGGCG|upstream_gene_variant|MODIFIER|OS01G0618100|OS01G0618100|transcript|OS01T0618100-01|protein_coding||c.-2767_-2747dupCGCCGCCTCTGCCTCCGCAGC|||||2645|,T…
chr01	24590352	A	ACACCGAGGAGGGGGGAGTAG	8589.37	1|1	0/0	0/0	0/0	0/0	0/0	0/0	0/0	0/0	0/0	0/0	0/0	0/0	0/0	1|1	0/0	0/0	1|1	0/0	0/0	1|1	0/0	0/0	0/0	ACACCGAGGAGGGGGGAGTAG|downstream_gene_variant|MODIFIER|OS01G0618200|OS01G0618200|transcript|OS01T0618200-01|protein_coding||c.*3334_*3335insCACCGAGGAGGGGGGAGTAG|||||924|,ACACCGAGGAGGGGGGAGTAG|downstream_gene_variant|MODIFIER|OS01G0618300|OS01G0618300|transcript|OS01T0618300-01|protein_coding||c.*2355_*2356insCTACTCCCCCCTCCTCGGTG|||||2107|,ACACCGAGGAGGGGGGAGTAG|intergenic_region|MODIFIER|OS01G0618…
chr01	24592269	CCACAAATAAAATATAGAAACATGCAAGATAAATTCTG	C	10768.3	1|1	0/0	0/0	0/0	0/0	0/0	0/0	0/0	0/0	0/0	0/0	0/0	0/0	0/0	1|1	0/0	0/0	1|1	0/0	0/0	1|1	0/0	0/0	0/0	C|downstream_gene_variant|MODIFIER|OS01G0618200|OS01G0618200|transcript|OS01T0618200-01|protein_coding||c.*5252_*5288delCACAAATAAAATATAGAAACATGCAAGATAAATTCTG|||||2841|,C|downstream_gene_variant|MODIFIER|OS01G0618300|OS01G0618300|transcript|OS01T0618300-01|protein_coding||c.*402_*438delCAGAATTTATCTTGCATGTTTCTATATTTTATTTGTG|||||190|,C|intergenic_region|MODIFIER|OS01G0618200-OS01G0618300|OS01G061820…
chr01	24595619	CAAATTTTTTAAGTAGTGTATTAGTCATATTTTGTTCCTCAGAAACATATTATGTACACATGTTATTACACCTATGTACTATTATACCGATGTGTAAAGTCTTAAACTT	C	3829.88	0/0	0/0	0/0	0/0	1/1	0/0	0/0	0/0	0/0	0/0	1/1	1/1	1/1	0/0	0/0	0/0	0/0	0/0	0/0	0/0	0/0	0/0	0/0	1/1	C|upstream_gene_variant|MODIFIER|OS01G0618400|OS01G0618400|transcript|OS01T0618400-01|protein_coding||c.-2627_-2520del|||||2561|,C|downstream_gene_variant|MODIFIER|OS01G0618450|OS01G0618450|transcript|OS01T0618450-00|lincRNA||n.*4713_*4820del|||||4820|,C|intron_variant|MODIFIER|OS01G0618300|OS01G0618300|transcript|OS01T0618300-01|protein_coding|1/2|c.302+189_303-140del||||||
chr01	24607617	AAGTTTGAATCTAAACTTCAG	A	9516.88	0/0	0/0	0/0	0/0	1|1	0/0	0/0	0/0	0/0	0/0	1|1	1|1	1|1	0/0	0/0	0/0	0/0	0/0	0/0	0/0	0/0	0/0	0/0	1|1	A|upstream_gene_variant|MODIFIER|OS01G0618601|OS01G0618601|transcript|OS01T0618601-00|lincRNA||n.-2541_-2522delCTGAAGTTTAGATTCAAACT|||||2522|,A|downstream_gene_variant|MODIFIER|OS01G0618500|OS01G0618500|transcript|OS01T0618500-01|protein_coding||c.*2488_*2507delAGTTTGAATCTAAACTTCAG|||||2134|,A|downstream_gene_variant|MODIFIER|EPlOSAG00000014673|EPlOSAG00000014673|transcript|EPlOSAT00000016061|lin…
chr01	24609658	A	ATATCTATGAATATAGGCTCTCATG	1366.26	0/0	0/0	0/0	0/0	0/0	0/0	0/0	0/0	0/0	0/0	0/0	0/0	0/0	0/0	0/0	0/0	0/0	1|1	0/0	0/0	0/0	0/0	0/0	0/0	ATATCTATGAATATAGGCTCTCATG|upstream_gene_variant|MODIFIER|OS01G0618601|OS01G0618601|transcript|OS01T0618601-00|lincRNA||n.-4563_-4562insCATGAGAGCCTATATTCATAGATA|||||4563|,ATATCTATGAATATAGGCTCTCATG|upstream_gene_variant|MODIFIER|OS01G0618700|OS01G0618700|transcript|OS01T0618700-01|protein_coding||c.-4575_-4574insTATCTATGAATATAGGCTCTCATG|||||4572|,ATATCTATGAATATAGGCTCTCATG|downstream_gene_variant|MO…
chr01	24609754	T	TTCCATTTATTACTAGATTGGTG	8909.37	1/1	0/0	0/0	0/0	0/0	0/0	0/0	0/0	0/0	0/0	0/0	0/0	0/0	0/0	1/1	0/0	0/0	1/1	0/0	0/0	1/1	0/0	0/0	0/0	TTCCATTTATTACTAGATTGGTG|upstream_gene_variant|MODIFIER|OS01G0618601|OS01G0618601|transcript|OS01T0618601-00|lincRNA||n.-4659_-4658insCACCAATCTAGTAATAAATGGA|||||4659|,TTCCATTTATTACTAGATTGGTG|upstream_gene_variant|MODIFIER|OS01G0618700|OS01G0618700|transcript|OS01T0618700-01|protein_coding||c.-4479_-4478insTCCATTTATTACTAGATTGGTG|||||4476|,TTCCATTTATTACTAGATTGGTG|downstream_gene_variant|MODIFIER|OS0…
chr01	24623415	GGCGTTGGGTTTGTTCGGTCGGCGGT	G	3307.32	1/1	0/0	0/0	0/0	0/0	0/0	0/0	0/0	0/0	0/0	0/0	0/0	0/0	0/0	1/1	0/0	0/0	1/1	0/0	0/0	1/1	0/0	0/0	0/0	G|upstream_gene_variant|MODIFIER|OS01G0618800|OS01G0618800|transcript|OS01T0618800-01|protein_coding||c.-4861_-4837delACCGCCGACCGAACAAACCCAACGC|||||4835|WARNING_TRANSCRIPT_NO_START_CODON,G|upstream_gene_variant|MODIFIER|EPlOSAG00000017927|EPlOSAG00000017927|transcript|EPlOSAT00000019315|lincRNA||n.-3851_-3827delGCGTTGGGTTTGTTCGGTCGGCGGT|||||3851|,G|upstream_gene_variant|MODIFIER|OS01G0618800|OS01…
chr01	24647796	GAGCCGCCGCCGCTGCCACGCCGCCCGCAC	G	3511.32	1/1	0/0	0/0	0/0	0/0	0/0	0/0	0/0	0/0	0/0	0/0	0/0	0/0	0/0	1/1	0/0	0/0	1/1	0/0	0/0	1/1	0/0	0/0	0/0	G|upstream_gene_variant|MODIFIER|EPlOSAG00000029452|EPlOSAG00000029452|transcript|EPlOSAT00000030840|lincRNA||n.-2889_-2861delGTGCGGGCGGCGTGGCAGCGGCGGCGGCT|||||2861|,G|upstream_gene_variant|MODIFIER|EPlOSAG00000036108|EPlOSAG00000036108|transcript|EPlOSAT00000037496|lincRNA||n.-2807_-2779delAGCCGCCGCCGCTGCCACGCCGCCCGCAC|||||2807|,G|downstream_gene_variant|MODIFIER|EPlOSAG00000029048|EPlOSAG000000…
chr01	24649938	CAGTTTGGGTAGTGGATCATTAAATCTATATATATTTCAATGAACTCAACATCTAGAGA	C	7066.34	1/1	0/0	0/0	0/0	0/0	0/0	0/0	0/0	0/0	0/0	0/0	0/0	0/0	0/0	1/1	0/0	0/0	1/1	0/0	0/0	1/1	0/0	0/0	0/0	C|upstream_gene_variant|MODIFIER|EPlOSAG00000036108|EPlOSAG00000036108|transcript|EPlOSAT00000037496|lincRNA||n.-665_-608delAGTTTGGGTAGTGGATCATTAAATCTATATATATTTCAATGAACTCAACATCTAGAGA|||||665|,C|downstream_gene_variant|MODIFIER|EPlOSAG00000049700|EPlOSAG00000049700|transcript|EPlOSAT00000051088|lincRNA||n.*594_*651delTCTCTAGATGTTGAGTTCATTGAAATATATATAGATTTAATGATCCACTACCCAAACT|||||651|,C|downstream_…
chr01	24657954	GAGTTATCCTACTTTGCCCTGTTTTCATTATATGTTGTC	G	6384.33	1/1	0/0	0/0	0/0	0/0	0/0	0/0	0/0	0/0	0/0	0/0	0/0	0/0	0/0	1/1	0/0	0/0	1/1	0/0	0/0	1/1	0/0	0/0	0/0	G|downstream_gene_variant|MODIFIER|EPlOSAG00000015359|EPlOSAG00000015359|transcript|EPlOSAT00000016747|lincRNA||n.*69_*106delGACAACATATAATGAAAACAGGGCAAAGTAGGATAACT|||||106|,G|intergenic_region|MODIFIER|EPlOSAG00000049700-EPlOSAG00000015359|EPlOSAG00000049700-EPlOSAG00000015359|intergenic_region|EPlOSAG00000049700-EPlOSAG00000015359|||n.24657955_24657992delAGTTATCCTACTTTGCCCTGTTTTCATTATATGTTGTC|||…
chr01	24660898	T	TCGCCCGAGACTCCCAAGAAAGG	894.13	./.	0/0	0/0	0/0	0/0	0/0	0/0	0/0	0/0	0/0	0/0	0/0	0/0	0/0	1|1	0/0	0/0	./.	0/0	0/0	./.	0/0	0/0	0/0	TCGCCCGAGACTCCCAAGAAAGG|upstream_gene_variant|MODIFIER|EPlOSAG00000015359|EPlOSAG00000015359|transcript|EPlOSAT00000016747|lincRNA||n.-2810_-2809insCCTTTCTTGGGAGTCTCGGGCG|||||2810|,TCGCCCGAGACTCCCAAGAAAGG|intergenic_region|MODIFIER|EPlOSAG00000015359-EPlOSAG00000017862|EPlOSAG00000015359-EPlOSAG00000017862|intergenic_region|EPlOSAG00000015359-EPlOSAG00000017862|||n.24660898_24660899insCGCCCGAGACT…
chr01	24672082	C	CGCCGCCGACTGGTGTCTTTGCCTATACGGTTGGTTGGTCACACCACCATTGTTGGGCGTCTACATCTTCACTGTCCGGCCGCCTCATCT	4581.77	1/1	0/0	0/0	0/0	0/0	0/0	0/0	0/0	0/0	0/0	0/0	0/0	0/0	0/0	1/1	0/0	0/0	0/0	0/0	0/0	1/1	0/0	0/0	0/0	CGCCGCCGACTGGTGTCTTTGCCTATACGGTTGGTTGGTCACACCACCATTGTTGGGCGTCTACATCTTCACTGTCCGGCCGCCTCATCT|upstream_gene_variant|MODIFIER|EPlOSAG00000017862|EPlOSAG00000017862|transcript|EPlOSAT00000019250|lincRNA||n.-3946_-3945insAGATGAGGCGGCCGGACAGTGAAGATGTAGACGCCCAACAATGGTGGTGTGACCAACCAACCGTATAGGCAAAGACACCAGTCGGCGGC|||||3946|,CGCCGCCGACTGGTGTCTTTGCCTATACGGTTGGTTGGTCACACCACCATTGTTGGGCGTCTACATCTTCACTGTCCGGCCGCC…
chr01	24672281	CTCGCCTATACGGTGGTTGGTCACACCACCGTTGATGGACGTCTTTGCTTTCACCGACCGGCTTGCTTCCGCTGCCAACTGGTGTTT	C	5809.34	1/1	0/0	0/0	0/0	0/0	0/0	0/0	0/0	0/0	0/0	0/0	0/0	0/0	0/0	1/1	0/0	0/0	1/1	0/0	0/0	1/1	0/0	0/0	0/0	C|upstream_gene_variant|MODIFIER|EPlOSAG00000017862|EPlOSAG00000017862|transcript|EPlOSAT00000019250|lincRNA||n.-4230_-4145delAAACACCAGTTGGCAGCGGAAGCAAGCCGGTCGGTGAAAGCAAAGACGTCCATCAACGGTGGTGTGACCAACCACCGTATAGGCGA|||||4145|,C|intergenic_region|MODIFIER|EPlOSAG00000017862-OS01G0619800|EPlOSAG00000017862-OS01G0619800|intergenic_region|EPlOSAG00000017862-OS01G0619800|||n.24672282_24672367delTCGCCTATA…
chr01	24679503	TCTGCACCGGGTAGGCGAGTGATCAGGTTTTTGGGGAGTGCTTCCGCACGACTGCTCCTCGTCTTTGAC	T	5377.34	1|1	0/0	0/0	0/0	0/0	0/0	0/0	0/0	0/0	0/0	0/0	0/0	0/0	0/0	1|1	0/0	0/0	1|1	0/0	0/0	1|1	0/0	0/0	0/0	T|intergenic_region|MODIFIER|EPlOSAG00000017862-OS01G0619800|EPlOSAG00000017862-OS01G0619800|intergenic_region|EPlOSAG00000017862-OS01G0619800|||n.24679504_24679571delCTGCACCGGGTAGGCGAGTGATCAGGTTTTTGGGGAGTGCTTCCGCACGACTGCTCCTCGTCTTTGAC||||||
chr01	24706250	TTAGATTAGCAAGGAATATATAGGAACCAAACTAAATGATTGAGAACATTGGTAAA	T	10826.3	1|1	0/0	0/0	0/0	0/0	0/0	0/0	0/0	0/0	0/0	0/0	0/0	0/0	0/0	1|1	0/0	0/0	1|1	0/0	0/0	1|1	0/0	0/0	0/0	T|intron_variant|MODIFIER|OS01G0620100|OS01G0620100|transcript|OS01T0620100-01|protein_coding|4/7|c.441+23_441+77delTTTACCAATGTTCTCAATCATTTAGTTTGGTTCCTATATATTCCTTGCTAATCTA||||||
chr01	24711940	ATTTTGACTTCTACAAATTACAATAAAAAACAAATTAAATTCGTT	A	2996.23	1|1	0/0	0/0	0/0	0/0	0/0	0/0	0/0	0/0	0/0	0/0	0/0	0/0	0/0	1|1	0/0	0/0	1|1	0/0	0/0	1|1	0/0	0/0	0/0	A|upstream_gene_variant|MODIFIER|OS01G0620100|OS01G0620100|transcript|OS01T0620100-01|protein_coding||c.-3203_-3160delAACGAATTTAATTTGTTTTTTATTGTAATTTGTAGAAGTCAAAA|||||3030|,A|upstream_gene_variant|MODIFIER|OS01G0620301|OS01G0620301|transcript|OS01T0620301-00|protein_coding||c.-1268_-1225delTTTTGACTTCTACAAATTACAATAAAAAACAAATTAAATTCGTT|||||244|,A|upstream_gene_variant|MODIFIER|OS01G0620400|OS01G062…
chr01	24720511	T	TTTTCCATCACATCAACCTGTCATACACACACAA	1891.51	1|1	0/0	0/0	0/0	0/0	0/0	0/0	0/0	0/0	0/0	0/0	0/0	0/0	0/0	./.	0/0	0/0	./.	0/0	0/0	1|1	0/0	0/0	0/0	TTTTCCATCACATCAACCTGTCATACACACACAA|upstream_gene_variant|MODIFIER|EPlOSAG00000040465|EPlOSAG00000040465|transcript|EPlOSAT00000041853|lincRNA||n.-2943_-2942insTTTCCATCACATCAACCTGTCATACACACACAA|||||2942|,TTTTCCATCACATCAACCTGTCATACACACACAA|upstream_gene_variant|MODIFIER|EPlOSAG00000001765|EPlOSAG00000001765|transcript|EPlOSAT00000003153|lincRNA||n.-2965_-2964insTTTCCATCACATCAACCTGTCATACACACACAA||||…
chr01	24734273	GGGGGGAGGGCGGCCGGTCGCCGGATCCGGGCGAGGACGGCCACTGCCGCCGGATCCGTGCGCAGACGGCCGCGGGCCGCCTGTTGTCGCCGCCTGCCGGATCCGCCGCCCGCGCGCTCTAGTCACCAGGGAGGGGAGAGGAGAGGGAGGAGGGGAGGAGCCGCGGCCGGATCCGTGGCA	G	155.23	1|1	0/0	0/0	0/0	0/0	0/0	0/0	0/0	0/0	0/0	0/0	0/0	0/0	0/0	0/0	0/0	0/0	0/0	0/0	0/0	0/0	0/0	0/0	0/0	G|upstream_gene_variant|MODIFIER|EPlOSAG00000032545|EPlOSAG00000032545|transcript|EPlOSAT00000033933|lincRNA||n.-2154_-1976del|||||1976|,G|upstream_gene_variant|MODIFIER|EPlOSAG00000005372|EPlOSAG00000005372|transcript|EPlOSAT00000006760|lincRNA||n.-371_-193del|||||193|,G|upstream_gene_variant|MODIFIER|EPlOSAG00000046262|EPlOSAG00000046262|transcript|EPlOSAT00000047650|lincRNA||n.-4546_-4368del||…
chr01	24734783	C	CGCGACACAAAAATAGATTTTCCTATGCGG	6202.3	1/1	0/0	0/0	0/0	0/0	0/0	0/0	0/0	0/0	0/0	0/0	0/0	0/0	0/0	1/1	0/0	0/0	1/1	0/0	0/0	1/1	0/0	0/0	0/0	CGCGACACAAAAATAGATTTTCCTATGCGG|upstream_gene_variant|MODIFIER|EPlOSAG00000032545|EPlOSAG00000032545|transcript|EPlOSAT00000033933|lincRNA||n.-2486_-2485insCCGCATAGGAAAATCTATTTTTGTGTCGC|||||2486|,CGCGACACAAAAATAGATTTTCCTATGCGG|upstream_gene_variant|MODIFIER|EPlOSAG00000005372|EPlOSAG00000005372|transcript|EPlOSAT00000006760|lincRNA||n.-703_-702insCCGCATAGGAAAATCTATTTTTGTGTCGC|||||703|,CGCGACACAAAA…
chr01	24738987	TATATATATATATATATATATATATATATATATATA	T	8167.32	1|1	0/0	0/0	0/0	./.	0/0	0/0	0/0	0/0	0/0	./.	0/0	0/0	0/0	1|1	0/0	0/0	1|1	0/0	0/0	1|1	0/0	0/0	0/0	T|upstream_gene_variant|MODIFIER|EPlOSAG00000005372|EPlOSAG00000005372|transcript|EPlOSAT00000006760|lincRNA||n.-4941_-4907delTATATATATATATATATATATATATATATATATAT|||||4907|,T|upstream_gene_variant|MODIFIER|EPlOSAG00000046285|EPlOSAG00000046285|transcript|EPlOSAT00000047673|lincRNA||n.-102_-68delTATATATATATATATATATATATATATATATATAT|||||68|,T|upstream_gene_variant|MODIFIER|OS01G0620800|OS01G0620800|t…
chr01	24740907	GTGTTTAGTTCACGTTAAAATTGAAAGTTTGGTTGAAATTGAAA	G	6172.34	1|1	0/0	0/0	0/0	0/0	0/0	0/0	0/0	0/0	0/0	0/0	0/0	0/0	0/0	1|1	0/0	0/0	1|1	0/0	0/0	1|1	0/0	0/0	0/0	G|3_prime_UTR_variant|MODIFIER|OS01G0620800|OS01G0620800|transcript|OS01T0620800-01|protein_coding|1/1|c.*231_*273delTTTAGTTCACGTTAAAATTGAAAGTTTGGTTGAAATTGAAATG|||||231|INFO_REALIGN_3_PRIME,G|upstream_gene_variant|MODIFIER|EPlOSAG00000046285|EPlOSAG00000046285|transcript|EPlOSAT00000047673|lincRNA||n.-2030_-1988delTTTCAATTTCAACCAAACTTTCAATTTTAACGTGAACTAAACA|||||1988|,G|upstream_gene_variant|MODIF…
chr01	24741325	CGTGCGGGCCGGCTGACCGCACGGGATAA	C	5713.34	1|1	0/0	0/0	0/0	0/0	0/0	0/0	0/0	0/0	0/0	0/0	0/0	0/0	0/0	1|1	0/0	0/0	1|1	0/0	0/0	1|1	0/0	0/0	0/0	C|splice_region_variant&non_coding_transcript_exon_variant|LOW|EPlOSAG00000006713|EPlOSAG00000006713|transcript|EPlOSAT00000008101|lincRNA|1/1|n.64_*13delTTATCCCGTGCGGTCAGCCGGCCCGCAC||||||,C|upstream_gene_variant|MODIFIER|EPlOSAG00000046285|EPlOSAG00000046285|transcript|EPlOSAT00000047673|lincRNA||n.-2433_-2406delTTATCCCGTGCGGTCAGCCGGCCCGCAC|||||2406|,C|upstream_gene_variant|MODIFIER|EPlOSAG00000…
chr01	24749913	T	TACCCCCAAAAAAAAATAATCATCCAC	2384.13	./.	0/0	0/0	0/0	0/0	0/0	0/0	0/0	0/0	0/0	0/0	0/0	0/0	0/0	1|1	0/0	0/0	./.	0/0	0/0	./.	0/0	0/0	0/0	TACCCCCAAAAAAAAATAATCATCCAC|upstream_gene_variant|MODIFIER|EPlOSAG00000046341|EPlOSAG00000046341|transcript|EPlOSAT00000047729|lincRNA||n.-837_-836insGTGGATGATTATTTTTTTTTGGGGGT|||||837|,TACCCCCAAAAAAAAATAATCATCCAC|upstream_gene_variant|MODIFIER|EPlOSAG00000047915|EPlOSAG00000047915|transcript|EPlOSAT00000049303|lincRNA||n.-3601_-3600insACCCCCAAAAAAAAATAATCATCCAC|||||3600|,TACCCCCAAAAAAAAATAATCATC…
chr01	24749915	C	CCCCCAAAAAAAAATAATCATCCA	852.76	./.	0/0	0/0	0/0	0/0	0/0	0/0	0/0	0/0	0/0	0/0	0/0	0/0	0/0	0/0	0/0	0/0	./.	0/0	0/0	1|1	0/0	0/0	0/0	CCCCCAAAAAAAAATAATCATCCA|upstream_gene_variant|MODIFIER|EPlOSAG00000046341|EPlOSAG00000046341|transcript|EPlOSAT00000047729|lincRNA||n.-839_-838insTGGATGATTATTTTTTTTTGGGG|||||839|,CCCCCAAAAAAAAATAATCATCCA|upstream_gene_variant|MODIFIER|EPlOSAG00000047915|EPlOSAG00000047915|transcript|EPlOSAT00000049303|lincRNA||n.-3599_-3598insCCCCAAAAAAAAATAATCATCCA|||||3598|,CCCCCAAAAAAAAATAATCATCCA|upstream_ge…
chr01	24750822	GCTGGCATGAGGGTCCCACAGCTTGTCGACCCA	G	10942.3	1/1	0/0	0/0	0/0	0/0	0/0	0/0	0/0	0/0	0/0	0/0	0/0	0/0	0/0	1/1	0/0	0/0	1/1	0/0	0/0	1/1	0/0	0/0	0/0	G|upstream_gene_variant|MODIFIER|EPlOSAG00000046341|EPlOSAG00000046341|transcript|EPlOSAT00000047729|lincRNA||n.-1777_-1746delTGGGTCGACAAGCTGTGGGACCCTCATGCCAG|||||1746|,G|upstream_gene_variant|MODIFIER|EPlOSAG00000047915|EPlOSAG00000047915|transcript|EPlOSAT00000049303|lincRNA||n.-2691_-2660delCTGGCATGAGGGTCCCACAGCTTGTCGACCCA|||||2691|,G|upstream_gene_variant|MODIFIER|EPlOSAG00000030110|EPlOSAG00…
chr01	24753137	C	CTACTTGTCTTGTTAAAAAAATTTGAAATTATTATTTATTTTATTTGTGACATACTTTATTATCCAAAT	1704.26	0/0	0/0	0/0	0/0	0/0	0/0	0/0	0/0	0/0	0/0	0/0	0/0	0/0	0/0	./.	0/0	0/0	0/0	0/0	0/0	1|1	0/0	0/0	0/0	CTACTTGTCTTGTTAAAAAAATTTGAAATTATTATTTATTTTATTTGTGACATACTTTATTATCCAAAT|upstream_gene_variant|MODIFIER|EPlOSAG00000046341|EPlOSAG00000046341|transcript|EPlOSAT00000047729|lincRNA||n.-4061_-4060insATTTGGATAATAAAGTATGTCACAAATAAAATAAATAATAATTTCAAATTTTTTTAACAAGACAAGTA|||||4061|,CTACTTGTCTTGTTAAAAAAATTTGAAATTATTATTTATTTTATTTGTGACATACTTTATTATCCAAAT|upstream_gene_variant|MODIFIER|EPlOSAG00000047915|EPlOSA…
chr01	24761208	GAAATCAATGGATTTACATAATCATCAATAATCATATCGTTGTAAAAACA	G	6633.34	1/1	0/0	0/0	0/0	0/0	0/0	0/0	0/0	0/0	0/0	0/0	0/0	0/0	0/0	1/1	0/0	0/0	1/1	0/0	0/0	1/1	0/0	0/0	0/0	G|upstream_gene_variant|MODIFIER|OS01G0621200|OS01G0621200|transcript|OS01T0621200-00|protein_coding||c.-2679_-2631delTGTTTTTACAACGATATGATTATTGATGATTATGTAAATCCATTGATTT|||||2631|,G|upstream_gene_variant|MODIFIER|EPlOSAG00000040189|EPlOSAG00000040189|transcript|EPlOSAT00000041577|lincRNA||n.-4085_-4037delAAATCAATGGATTTACATAATCATCAATAATCATATCGTTGTAAAAACA|||||4085|,G|downstream_gene_variant|MODIFIER|…
chr01	24771150	C	CAATTGTCATAAGGGAAGGGCGTGTT	15989.4	1/1	0/0	0/0	0/0	0/0	0/0	0/0	0/0	0/0	0/0	0/0	0/0	0/0	0/0	1/1	0/0	0/0	1/1	0/0	0/0	1/1	0/0	0/0	0/0	CAATTGTCATAAGGGAAGGGCGTGTT|upstream_gene_variant|MODIFIER|OS01G0621300|OS01G0621300|transcript|OS01T0621300-01|protein_coding||c.-3270_-3269insAACACGCCCTTCCCTTATGACAATT|||||2897|,CAATTGTCATAAGGGAAGGGCGTGTT|upstream_gene_variant|MODIFIER|OS01G0621500|OS01G0621500|transcript|OS01T0621500-00|protein_coding||c.-3011_-3010insAATTGTCATAAGGGAAGGGCGTGTT|||||3010|,CAATTGTCATAAGGGAAGGGCGTGTT|upstream_gene_…
chr01	24774735	A	ATCTGCAGGCATGAAGTATGATCCGTGATGGTT	9350.37	1|1	0/0	0/0	0/0	0/0	0/0	0/0	0/0	0/0	0/0	0/0	0/0	0/0	0/0	1|1	0/0	0/0	1|1	0/0	0/0	1|1	0/0	0/0	0/0	ATCTGCAGGCATGAAGTATGATCCGTGATGGTT|upstream_gene_variant|MODIFIER|EPlOSAG00000004676|EPlOSAG00000004676|transcript|EPlOSAT00000006064|lincRNA||n.-799_-798insTCTGCAGGCATGAAGTATGATCCGTGATGGTT|||||798|,ATCTGCAGGCATGAAGTATGATCCGTGATGGTT|downstream_gene_variant|MODIFIER|OS01G0621500|OS01G0621500|transcript|OS01T0621500-00|protein_coding||c.*161_*162insTCTGCAGGCATGAAGTATGATCCGTGATGGTT|||||162|,ATCTGCAGG…
chr01	24789659	GTAGTAGTGGACTGTACACTTGCT	G	7309.34	1|1	0/0	0/0	0/0	0/0	0/0	0/0	0/0	0/0	0/0	0/0	0/0	0/0	0/0	1|1	0/0	0/0	1|1	0/0	0/0	1|1	0/0	0/0	0/0	G|upstream_gene_variant|MODIFIER|OS01G0621600|OS01G0621600|transcript|OS01T0621600-01|protein_coding||c.-2340_-2318delAGCAAGTGTACAGTCCACTACTA|||||1507|,G|upstream_gene_variant|MODIFIER|EPlOSAG00000005834|EPlOSAG00000005834|transcript|EPlOSAT00000007222|lincRNA||n.-1563_-1541delTAGTAGTGGACTGTACACTTGCT|||||1563|,G|upstream_gene_variant|MODIFIER|OS01G0621700|OS01G0621700|transcript|OS01T0621700-01|p…
chr01	24791262	AAGATGACCACCAGCGAAAATGGATTTTTGTTGGCGGTCAATAACCGCTAGCGAAGATCTTGATCTTCACTGGCCTTTGCTACATTTTCGCTGGCG	A	3466.08	0/0	0/0	0/0	0/0	0/0	0/0	0/0	0/0	0/0	0/0	0/0	0/0	0/0	0/0	0/0	0/0	0/0	1|1	0/0	0/0	1|1	0/0	0/0	0/0	A|splice_region_variant&non_coding_transcript_exon_variant|LOW|EPlOSAG00000005834|EPlOSAG00000005834|transcript|EPlOSAT00000007222|lincRNA|1/1|n.41_*57delAGATGACCACCAGCGAAAATGGATTTTTGTTGGCGGTCAATAACCGCTAGCGAAGATCTTGATCTTCACTGGCCTTTGCTACATTTTCGCTGGCG||||||,A|upstream_gene_variant|MODIFIER|OS01G0621600|OS01G0621600|transcript|OS01T0621600-01|protein_coding||c.-4015_-3921delCGCCAGCGAAAATGTAGCAAAGGCC…
chr01	24791524	G	GATGTGTGCGAGTTCAAATCAACTGAACAATCAGGGCACTGATTTTGAGGATTTTTGTCTAGGTTTGATGAGGACCAGGA	10236.8	1|1	0/0	0/0	0/0	0/0	0/0	0/0	0/0	0/0	0/0	0/0	0/0	0/0	0/0	./.	0/0	0/0	1|1	0/0	0/0	1|1	0/0	0/0	0/0	GATGTGTGCGAGTTCAAATCAACTGAACAATCAGGGCACTGATTTTGAGGATTTTTGTCTAGGTTTGATGAGGACCAGGA|upstream_gene_variant|MODIFIER|OS01G0621600|OS01G0621600|transcript|OS01T0621600-01|protein_coding||c.-4183_-4182insTCCTGGTCCTCATCAAACCTAGACAAAAATCCTCAAAATCAGTGCCCTGATTGTTCAGTTGATTTGAACTCGCACACAT|||||3372|,GATGTGTGCGAGTTCAAATCAACTGAACAATCAGGGCACTGATTTTGAGGATTTTTGTCTAGGTTTGATGAGGACCAGGA|upstream_gene_variant|MODIFIER|…
chr01	24794419	G	GTTAAGAGTCTTGACGGCTCA	1018.13	./.	0/0	0/0	0/0	0/0	0/0	0/0	0/0	0/0	0/0	0/0	0/0	0/0	0/0	./.	0/0	0/0	1|1	0/0	0/0	./.	0/0	0/0	0/0	GTTAAGAGTCTTGACGGCTCA|downstream_gene_variant|MODIFIER|EPlOSAG00000005834|EPlOSAG00000005834|transcript|EPlOSAT00000007222|lincRNA||n.*3119_*3120insTTAAGAGTCTTGACGGCTCA|||||3120|,GTTAAGAGTCTTGACGGCTCA|downstream_gene_variant|MODIFIER|OS01G0621700|OS01G0621700|transcript|OS01T0621700-01|protein_coding||c.*249_*250insTTAAGAGTCTTGACGGCTCA|||||48|,GTTAAGAGTCTTGACGGCTCA|intergenic_region|MODIFIER|OS01…
chr01	24796256	GAGATGAAAAGAAAAAAAAAAGAGGT	G	8655.85	1/1	0/0	0/0	0/0	0/0	0/0	0/0	0/0	0/0	0/0	0/0	0/0	0/0	0/0	./.	0/0	0/0	1/1	0/0	0/0	1/1	0/0	0/0	0/0	G|downstream_gene_variant|MODIFIER|EPlOSAG00000005834|EPlOSAG00000005834|transcript|EPlOSAT00000007222|lincRNA||n.*4957_*4981delAGATGAAAAGAAAAAAAAAAGAGGT|||||4957|,G|downstream_gene_variant|MODIFIER|OS01G0621700|OS01G0621700|transcript|OS01T0621700-01|protein_coding||c.*2087_*2111delAGATGAAAAGAAAAAAAAAAGAGGT|||||1885|,G|intergenic_region|MODIFIER|OS01G0621700-OS01G0621900|OS01G0621700-OS01G062190…
chr01	24800319	G	GAACTCGCACAGTGAATTTTAT	9833.37	1/1	0/0	0/0	0/0	0/0	0/0	0/0	0/0	0/0	0/0	0/0	0/0	0/0	0/0	1/1	0/0	0/0	1/1	0/0	0/0	1/1	0/0	0/0	0/0	GAACTCGCACAGTGAATTTTAT|intergenic_region|MODIFIER|OS01G0621700-OS01G0621900|OS01G0621700-OS01G0621900|intergenic_region|OS01G0621700-OS01G0621900|||n.24800319_24800320insAACTCGCACAGTGAATTTTAT||||||
chr01	24806971	T	TTAGCTTCTAAAACATGAGAACCGTC	629.76	0/0	0/0	0/0	0/0	0/0	0/0	0/0	0/0	0/0	0/0	0/0	0/0	0/0	0/0	./.	0/0	0/0	./.	0/0	0/0	1/1	0/0	0/0	0/0	TTAGCTTCTAAAACATGAGAACCGTC|upstream_gene_variant|MODIFIER|OS01G0621900|OS01G0621900|transcript|OS01T0621900-01|protein_coding||c.-4099_-4098insTAGCTTCTAAAACATGAGAACCGTC|||||1544|,TTAGCTTCTAAAACATGAGAACCGTC|upstream_gene_variant|MODIFIER|OS01G0621900|OS01G0621900|transcript|OS01T0621900-02|protein_coding||c.-4099_-4098insTAGCTTCTAAAACATGAGAACCGTC|||||1607|,TTAGCTTCTAAAACATGAGAACCGTC|upstream_gene_…
chr01	24814994	C	CACATCTTTTACCATGTACATTCTGAA	14963.4	1/1	0/0	0/0	0/0	0/0	0/0	0/0	0/0	0/0	0/0	0/0	0/0	0/0	0/0	1/1	0/0	0/0	1/1	0/0	0/0	1/1	0/0	0/0	0/0	CACATCTTTTACCATGTACATTCTGAA|upstream_gene_variant|MODIFIER|OS01G0622000|OS01G0622000|transcript|OS01T0622000-00|protein_coding||c.-703_-702insTTCAGAATGTACATGGTAAAAGATGT|||||703|WARNING_TRANSCRIPT_NO_START_CODON,CACATCTTTTACCATGTACATTCTGAA|upstream_gene_variant|MODIFIER|EPlOSAG00000031952|EPlOSAG00000031952|transcript|EPlOSAT00000033340|lincRNA||n.-248_-247insTTCAGAATGTACATGGTAAAAGATGT|||||248|,CA…
chr01	24828651	T	TGTACTAACGAAACAATAGAGAACCGCCTTAA	582.12	./.	0/0	0/0	0/0	0/0	0/0	0/0	0/0	0/0	0/0	0/0	0/0	0/0	0/0	./.	0/0	0/0	./.	0/0	0/0	1|1	0/0	0/0	0/0	TGTACTAACGAAACAATAGAGAACCGCCTTAA|upstream_gene_variant|MODIFIER|OS01G0622300|OS01G0622300|transcript|OS01T0622300-01|protein_coding||c.-575_-574insTTAAGGCGGTTCTCTATTGTTTCGTTAGTAC|||||513|,TGTACTAACGAAACAATAGAGAACCGCCTTAA|upstream_gene_variant|MODIFIER|OS01G0622500|OS01G0622500|transcript|OS01T0622500-01|protein_coding||c.-5032_-5031insGTACTAACGAAACAATAGAGAACCGCCTTAA|||||4803|,TGTACTAACGAAACAATAGA…
chr01	24838856	GCACCCACCCACCAACTCCCCACTGACTCCGCAACCCCACCACCAACTCCCCACTGACTC	G	7244.34	1|1	0/0	0/0	0/0	0/0	0/0	0/0	0/0	0/0	0/0	0/0	0/0	0/0	0/0	1|1	0/0	0/0	1|1	0/0	0/0	1|1	0/0	0/0	0/0	G|upstream_gene_variant|MODIFIER|OS01G0622400|OS01G0622400|transcript|OS01T0622400-00|protein_coding||c.-4698_-4640delGAGTCAGTGGGGAGTTGGTGGTGGGGTTGCGGAGTCAGTGGGGAGTTGGTGGGTGGGTG|||||4640|,G|upstream_gene_variant|MODIFIER|OS01G0622600|OS01G0622600|transcript|OS01T0622600-01|protein_coding||c.-381_-323delCACCCACCCACCAACTCCCCACTGACTCCGCAACCCCACCACCAACTCCCCACTGACTC|||||267|,G|downstream_gene_variant|…
chr01	24849162	T	TAATTTCCGACGATGAAACATGG	1039.13	./.	0/0	0/0	0/0	0/0	0/0	0/0	0/0	0/0	0/0	0/0	0/0	0/0	0/0	1/1	0/0	0/0	./.	0/0	0/0	./.	0/0	0/0	0/0	TAATTTCCGACGATGAAACATGG|upstream_gene_variant|MODIFIER|OS01G0622700|OS01G0622700|transcript|OS01T0622700-01|protein_coding||c.-2770_-2769insCCATGTTTCATCGTCGGAAATT|||||2331|,TAATTTCCGACGATGAAACATGG|upstream_gene_variant|MODIFIER|OS01G0622901|OS01G0622901|transcript|OS01T0622901-01|protein_coding||c.-1562_-1561insAATTTCCGACGATGAAACATGG|||||1455|,TAATTTCCGACGATGAAACATGG|upstream_gene_variant|MODIFIE…
chr01	24850173	GTCCAAACCCTATAGAAGTTGT	G	13834.3	1|1	0/0	0/0	0/0	0/0	0/0	0/0	0/0	0/0	0/0	0/0	0/0	0/0	0/0	1|1	0/0	0/0	1|1	0/0	0/0	1|1	0/0	0/0	0/0	G|upstream_gene_variant|MODIFIER|OS01G0622700|OS01G0622700|transcript|OS01T0622700-01|protein_coding||c.-3801_-3781delACAACTTCTATAGGGTTTGGA|||||3342|,G|upstream_gene_variant|MODIFIER|OS01G0622901|OS01G0622901|transcript|OS01T0622901-01|protein_coding||c.-550_-530delTCCAAACCCTATAGAAGTTGT|||||444|,G|upstream_gene_variant|MODIFIER|EPlOSAG00000038430|EPlOSAG00000038430|transcript|EPlOSAT00000039818|l…
chr01	24855259	T	TATGTGTCAGTGACATGGCAA	14132.4	1/1	0/0	0/0	0/0	0/0	0/0	0/0	0/0	0/0	0/0	0/0	0/0	0/0	0/0	1/1	0/0	0/0	1/1	0/0	0/0	1/1	0/0	0/0	0/0	TATGTGTCAGTGACATGGCAA|upstream_gene_variant|MODIFIER|OS01G0622800|OS01G0622800|transcript|OS01T0622800-01|protein_coding||c.-4090_-4089insTTGCCATGTCACTGACACAT|||||4045|,TATGTGTCAGTGACATGGCAA|upstream_gene_variant|MODIFIER|EPlOSAG00000035020|EPlOSAG00000035020|transcript|EPlOSAT00000036408|lincRNA||n.-124_-123insTTGCCATGTCACTGACACAT|||||124|,TATGTGTCAGTGACATGGCAA|downstream_gene_variant|MODIFIER|O…
chr01	24871829	G	GTACCACTTGTGTGTGCTCCTTTTCTAGTACAAAGCTCCTTTTTCCCAAGATAATTCTGAAATATCTATCTTATTGA	18037.4	1/1	0/0	0/0	0/0	0/0	0/0	0/0	0/0	0/0	0/0	0/0	0/0	0/0	0/0	1/1	0/0	0/0	1/1	0/0	0/0	1/1	0/0	0/0	0/0	GTACCACTTGTGTGTGCTCCTTTTCTAGTACAAAGCTCCTTTTTCCCAAGATAATTCTGAAATATCTATCTTATTGA|upstream_gene_variant|MODIFIER|EPlOSAG00000036463|EPlOSAG00000036463|transcript|EPlOSAT00000037851|lincRNA||n.-3621_-3620insTCAATAAGATAGATATTTCAGAATTATCTTGGGAAAAAGGAGCTTTGTACTAGAAAAGGAGCACACACAAGTGGTA|||||3621|,GTACCACTTGTGTGTGCTCCTTTTCTAGTACAAAGCTCCTTTTTCCCAAGATAATTCTGAAATATCTATCTTATTGA|downstream_gene_variant|MODIFIER…
chr01	24878108	T	TAGAAAATCTCACATTAATCATAGAAAAACCA,TAGAAAATCCTACATTAATCACAGAAAAACCA	27201.4	1|1	0/0	0/0	0/0	2/2	0/0	2/2	0/0	0/0	0/0	2/2	2/2	2/2	0/0	1|1	2/2	0/0	1|1	0/0	0/0	1|1	0/0	0/0	2/2	TAGAAAATCCTACATTAATCACAGAAAAACCA|upstream_gene_variant|MODIFIER|EPlOSAG00000006132|EPlOSAG00000006132|transcript|EPlOSAT00000007520|lincRNA||n.-2818_-2817insTGGTTTTTCTGTGATTAATGTAGGATTTTCT|||||2818|,TAGAAAATCTCACATTAATCATAGAAAAACCA|upstream_gene_variant|MODIFIER|EPlOSAG00000006132|EPlOSAG00000006132|transcript|EPlOSAT00000007520|lincRNA||n.-2818_-2817insTGGTTTTTCTATGATTAATGTGAGATTTTCT|||||2818|,T…
chr01	24881863	TCACAATAGTCCCGGTTCCATTAAAAACCGGGACTAAAAATTCACTGGTAGAGAAACCATC	T	5586.75	1|1	0/0	0/0	0/0	0/0	0/0	0/0	0/0	0/0	0/0	0/0	0/0	0/0	0/0	1|1	0/0	0/0	./.	0/0	0/0	1|1	0/0	0/0	0/0	T|upstream_gene_variant|MODIFIER|EPlOSAG00000002627|EPlOSAG00000002627|transcript|EPlOSAT00000004015|lincRNA||n.-96_-37delCACAATAGTCCCGGTTCCATTAAAAACCGGGACTAAAAATTCACTGGTAGAGAAACCATC|||||96|,T|intergenic_region|MODIFIER|EPlOSAG00000006132-EPlOSAG00000002627|EPlOSAG00000006132-EPlOSAG00000002627|intergenic_region|EPlOSAG00000006132-EPlOSAG00000002627|||n.24881864_24881923delCACAATAGTCCCGGTTCCATTAA…
chr01	24882552	G	GGCGCGGCGGCGCGGGGGGCC	2693.94	./.	./.	0/0	./.	./.	./.	0/0	./.	./.	./.	0/0	0/0	0/0	0/0	1/1	0/0	0/0	1/1	0/0	./.	./.	0/0	0/0	0/0	GGCGCGGCGGCGCGGGGGGCC|downstream_gene_variant|MODIFIER|EPlOSAG00000002627|EPlOSAG00000002627|transcript|EPlOSAT00000004015|lincRNA||n.*440_*441insGCGCGGCGGCGCGGGGGGCC|||||441|,GGCGCGGCGGCGCGGGGGGCC|intergenic_region|MODIFIER|EPlOSAG00000002627-OS01G0623500|EPlOSAG00000002627-OS01G0623500|intergenic_region|EPlOSAG00000002627-OS01G0623500|||n.24882552_24882553insGCGCGGCGGCGCGGGGGGCC||||||
chr01	24882553	G	GCGCGGCGGCGCGGGGGGCCA	7460.37	0/0	./.	0/0	./.	./.	./.	1/1	./.	./.	./.	1/1	1/1	1/1	0/0	0/0	1/1	0/0	0/0	0/0	./.	./.	0/0	0/0	1/1	GCGCGGCGGCGCGGGGGGCCA|downstream_gene_variant|MODIFIER|EPlOSAG00000002627|EPlOSAG00000002627|transcript|EPlOSAT00000004015|lincRNA||n.*441_*442insCGCGGCGGCGCGGGGGGCCA|||||442|,GCGCGGCGGCGCGGGGGGCCA|intergenic_region|MODIFIER|EPlOSAG00000002627-OS01G0623500|EPlOSAG00000002627-OS01G0623500|intergenic_region|EPlOSAG00000002627-OS01G0623500|||n.24882553_24882554insCGCGGCGGCGCGGGGGGCCA||||||
chr01	24889165	C	CAATATGTGGATTTAAAAGTCACTT	15547.4	1|1	0/0	0/0	0/0	0/0	0/0	0/0	0/0	0/0	0/0	0/0	0/0	0/0	0/0	1|1	0/0	0/0	1|1	0/0	0/0	1|1	0/0	0/0	0/0	CAATATGTGGATTTAAAAGTCACTT|intergenic_region|MODIFIER|EPlOSAG00000002627-OS01G0623500|EPlOSAG00000002627-OS01G0623500|intergenic_region|EPlOSAG00000002627-OS01G0623500|||n.24889165_24889166insAATATGTGGATTTAAAAGTCACTT||||||
chr01	24889479	G	GGTTTTCGCTGGACTACACACC	1654.5	1|1	0/0	0/0	0/0	0/0	0/0	0/0	0/0	0/0	0/0	0/0	0/0	0/0	0/0	1|1	0/0	0/0	./.	0/0	0/0	./.	0/0	0/0	0/0	GGTTTTCGCTGGACTACACACC|intergenic_region|MODIFIER|EPlOSAG00000002627-OS01G0623500|EPlOSAG00000002627-OS01G0623500|intergenic_region|EPlOSAG00000002627-OS01G0623500|||n.24889479_24889480insGTTTTCGCTGGACTACACACC||||||
chr01	24891112	CATATATATATATATATATATATATATATATATATATATATATATATATATATATAT	C,CATATATATATATATAT	5903.84	0/0	0/0	./.	./.	0/0	0/0	0/0	0/0	0/0	./.	0/0	2/2	0/0	0/0	0/0	0/0	0/0	0/0	0/0	0/0	1|1	./.	0/0	0/0	C|upstream_gene_variant|MODIFIER|OS01G0623500|OS01G0623500|transcript|OS01T0623500-01|protein_coding||c.-3720_-3665delATATATATATATATATATATATATATATATATATATATATATATATATATATATAT|||||3593|,CATATATATATATATAT|upstream_gene_variant|MODIFIER|OS01G0623500|OS01G0623500|transcript|OS01T0623500-01|protein_coding||c.-3704_-3665delATATATATATATATATATATATATATATATATATATATAT|||||3577|,C|intergenic_region|MODIFIER|…
chr01	24896852	T	TCTCTTTTGCATTTTAAGTACAGTGCAATATGAGTCATAATTTGAAACCACGAGTCTTACAGTCC	15553.4	1/1	0/0	0/0	0/0	0/0	0/0	0/0	0/0	0/0	0/0	0/0	0/0	0/0	0/0	1/1	0/0	0/0	1/1	0/0	0/0	1/1	0/0	0/0	0/0	TCTCTTTTGCATTTTAAGTACAGTGCAATATGAGTCATAATTTGAAACCACGAGTCTTACAGTCC|upstream_gene_variant|MODIFIER|OS01G0623750|OS01G0623750|transcript|OS01T0623750-00|protein_coding||c.-3860_-3859insCTCTTTTGCATTTTAAGTACAGTGCAATATGAGTCATAATTTGAAACCACGAGTCTTACAGTCC|||||3814|WARNING_TRANSCRIPT_INCOMPLETE,TCTCTTTTGCATTTTAAGTACAGTGCAATATGAGTCATAATTTGAAACCACGAGTCTTACAGTCC|downstream_gene_variant|MODIFIER|OS01G0623550|O…
chr01	24899567	CGAGGTACAGGACCTCACGGTACCAAATTATTTCCGATCGTTG	C	11875.3	1|1	0/0	0/0	0/0	0/0	0/0	0/0	0/0	0/0	0/0	0/0	0/0	0/0	0/0	1|1	0/0	0/0	1|1	0/0	0/0	1|1	0/0	0/0	0/0	C|3_prime_UTR_variant|MODIFIER|OS01G0623600|OS01G0623600|transcript|OS01T0623600-01|protein_coding|3/3|c.*234_*275delCAACGATCGGAAATAATTTGGTACCGTGAGGTCCTGTACCTC|||||234|,C|upstream_gene_variant|MODIFIER|OS01G0623550|OS01G0623550|transcript|OS01T0623550-00|protein_coding||c.-1402_-1361delCAACGATCGGAAATAATTTGGTACCGTGAGGTCCTGTACCTC|||||286|,C|upstream_gene_variant|MODIFIER|OS01G0623750|OS01G0623750|t…
chr01	24905155	T	TGCCACGCCAGCGAAACCGGACATCTATAGTGC,TGCCACGCCAGCGAAACCGGACATCTATAGTGCTATAGGACCTAAA	6057.23	0/0	0/0	0/0	0/0	0/0	0/0	0/0	0/0	0/0	0/0	0/0	0/0	0/0	0/0	2|2	0/0	0/0	2|2	0/0	0/0	1|1	0/0	0/0	0/0	TGCCACGCCAGCGAAACCGGACATCTATAGTGC|upstream_gene_variant|MODIFIER|OS01G0623600|OS01G0623600|transcript|OS01T0623600-01|protein_coding||c.-3344_-3343insGCACTATAGATGTCCGGTTTCGCTGGCGTGGC|||||3343|,TGCCACGCCAGCGAAACCGGACATCTATAGTGCTATAGGACCTAAA|upstream_gene_variant|MODIFIER|OS01G0623600|OS01G0623600|transcript|OS01T0623600-01|protein_coding||c.-3344_-3343insTTTAGGTCCTATAGCACTATAGATGTCCGGTTTCGCTGGCGTG…
chr01	24943224	GTTAGAAATTTATGTGTGTAGGAAAGTTTTAATGTGATGAAAAAGTTAAAAGTTTGAAGAAAAAA	G	11744.3	1|1	0/0	0/0	0/0	0/0	0/0	0/0	0/0	0/0	0/0	0/0	0/0	0/0	0/0	1|1	0/0	0/0	1|1	0/0	0/0	1|1	0/0	0/0	0/0	G|upstream_gene_variant|MODIFIER|EPlOSAG00000007055|EPlOSAG00000007055|transcript|EPlOSAT00000008443|lincRNA||n.-2552_-2489delTTTTTTCTTCAAACTTTTAACTTTTTCATCACATTAAAACTTTCCTACACACATAAATTTCTAA|||||2489|,G|upstream_gene_variant|MODIFIER|EPlOSAG00000029725|EPlOSAG00000029725|transcript|EPlOSAT00000031113|lincRNA||n.-355_-292delTTAGAAATTTATGTGTGTAGGAAAGTTTTAATGTGATGAAAAAGTTAAAAGTTTGAAGAAAAAA|||||355|,…
chr01	24943587	TATCTTCGTTCTAAAAATATAATAG	T	12657.3	1/1	0/0	0/0	0/0	0/0	0/0	0/0	0/0	0/0	0/0	0/0	0/0	0/0	0/0	1/1	0/0	0/0	1/1	0/0	0/0	1/1	0/0	0/0	0/0	T|upstream_gene_variant|MODIFIER|EPlOSAG00000007055|EPlOSAG00000007055|transcript|EPlOSAT00000008443|lincRNA||n.-2875_-2852delCTATTATATTTTTAGAACGAAGAT|||||2852|,T|downstream_gene_variant|MODIFIER|OS01G0624500|OS01G0624500|transcript|OS01T0624500-01|protein_coding||c.*1013_*1036delATCTTCGTTCTAAAAATATAATAG|||||789|WARNING_TRANSCRIPT_NO_START_CODON,T|downstream_gene_variant|MODIFIER|EPlOSAG000000138…
chr01	24948828	TTAAAAACCGACTCAAATACATATTTGTATTTCCAAAAGCG	T	11984.3	1|1	0/0	0/0	0/0	0/0	0/0	0/0	0/0	0/0	0/0	0/0	0/0	0/0	0/0	1|1	0/0	0/0	1|1	0/0	0/0	1|1	0/0	0/0	0/0	T|upstream_gene_variant|MODIFIER|OS01G0624700|OS01G0624700|transcript|OS01T0624700-01|protein_coding||c.-1673_-1634delCGCTTTTGGAAATACAAATATGTATTTGAGTCGGTTTTTA|||||1612|,T|downstream_gene_variant|MODIFIER|EPlOSAG00000049388|EPlOSAG00000049388|transcript|EPlOSAT00000050776|lincRNA||n.*4389_*4428delCGCTTTTGGAAATACAAATATGTATTTGAGTCGGTTTTTA|||||4428|,T|intergenic_region|MODIFIER|OS01G0624700-EPlOSAG00…
chr01	24952992	G	GAGCGACCAGTCGCGCGCGGCACGCGATC	12986.4	1|1	0/0	0/0	0/0	0/0	0/0	0/0	0/0	0/0	0/0	0/0	0/0	0/0	0/0	1|1	0/0	0/0	1|1	0/0	0/0	1|1	0/0	0/0	0/0	GAGCGACCAGTCGCGCGCGGCACGCGATC|upstream_gene_variant|MODIFIER|EPlOSAG00000006744|EPlOSAG00000006744|transcript|EPlOSAT00000008132|lincRNA||n.-1819_-1818insAGCGACCAGTCGCGCGCGGCACGCGATC|||||1818|,GAGCGACCAGTCGCGCGCGGCACGCGATC|upstream_gene_variant|MODIFIER|EPlOSAG00000040641|EPlOSAG00000040641|transcript|EPlOSAT00000042029|lincRNA||n.-1838_-1837insAGCGACCAGTCGCGCGCGGCACGCGATC|||||1837|,GAGCGACCAGTCG…
chr01	24954348	TCGGTCGCGTTCGACGCGTCACCGGCCGAGCCCGGCGCGGAGG	T	10158.3	1/1	0/0	0/0	0/0	0/0	0/0	0/0	0/0	0/0	0/0	0/0	0/0	0/0	0/0	1/1	0/0	0/0	1/1	0/0	0/0	1/1	0/0	0/0	0/0	T|upstream_gene_variant|MODIFIER|EPlOSAG00000049388|EPlOSAG00000049388|transcript|EPlOSAT00000050776|lincRNA||n.-1040_-999delCCTCCGCGCCGGGCTCGGCCGGTGACGCGTCGAACGCGACCG|||||999|,T|upstream_gene_variant|MODIFIER|EPlOSAG00000006744|EPlOSAG00000006744|transcript|EPlOSAT00000008132|lincRNA||n.-462_-421delCGGTCGCGTTCGACGCGTCACCGGCCGAGCCCGGCGCGGAGG|||||462|,T|upstream_gene_variant|MODIFIER|EPlOSAG000000…
chr01	24955380	CATTCCTAATCCTATTTTTTTGAGATTTTGGTTAAAAAAACTGGTCTAACAGAT	C	8801.34	1/1	0/0	0/0	0/0	0/0	0/0	0/0	0/0	0/0	0/0	0/0	0/0	0/0	0/0	1/1	0/0	0/0	1/1	0/0	0/0	1/1	0/0	0/0	0/0	C|upstream_gene_variant|MODIFIER|EPlOSAG00000049388|EPlOSAG00000049388|transcript|EPlOSAT00000050776|lincRNA||n.-2083_-2031delATCTGTTAGACCAGTTTTTTTAACCAAAATCTCAAAAAAATAGGATTAGGAAT|||||2031|,C|upstream_gene_variant|MODIFIER|EPlOSAG00000041314|EPlOSAG00000041314|transcript|EPlOSAT00000042702|lincRNA||n.-474_-422delATCTGTTAGACCAGTTTTTTTAACCAAAATCTCAAAAAAATAGGATTAGGAAT|||||422|,C|upstream_gene_varian…
chr01	24958242	CCCCCCCCCCCCCCCCCCCCCAA	C,*	7775.73	1|1	0/0	0/0	./.	./.	0/0	./.	./.	./.	./.	./.	2/2	0/0	0/0	1|1	./.	0/0	1|1	./.	0/0	1/1	0/0	0/0	./.	C|upstream_gene_variant|MODIFIER|EPlOSAG00000049388|EPlOSAG00000049388|transcript|EPlOSAT00000050776|lincRNA||n.-4914_-4893delTTGGGGGGGGGGGGGGGGGGGG|||||4893|,C|upstream_gene_variant|MODIFIER|EPlOSAG00000041314|EPlOSAG00000041314|transcript|EPlOSAT00000042702|lincRNA||n.-3305_-3284delTTGGGGGGGGGGGGGGGGGGGG|||||3284|,C|upstream_gene_variant|MODIFIER|EPlOSAG00000030404|EPlOSAG00000030404|transcript…
chr01	25015175	A	ACAAGGCCATGTCAATTGTTCTAGTTGCCACTGGTAAAGCCAAAGACAACAC	14496.4	1/1	0/0	0/0	0/0	0/0	0/0	0/0	0/0	0/0	0/0	0/0	0/0	0/0	0/0	1/1	0/0	0/0	1/1	0/0	0/0	1/1	0/0	0/0	0/0	ACAAGGCCATGTCAATTGTTCTAGTTGCCACTGGTAAAGCCAAAGACAACAC|upstream_gene_variant|MODIFIER|EPlOSAG00000037038|EPlOSAG00000037038|transcript|EPlOSAT00000038426|lincRNA||n.-653_-652insGTGTTGTCTTTGGCTTTACCAGTGGCAACTAGAACAATTGACATGGCCTTG|||||653|,ACAAGGCCATGTCAATTGTTCTAGTTGCCACTGGTAAAGCCAAAGACAACAC|upstream_gene_variant|MODIFIER|EPlOSAG00000003625|EPlOSAG00000003625|transcript|EPlOSAT00000005013|lincRNA||n.…
chr01	25053788	G	GTCATTTACTACTCCGAGAAAAA	11761.4	1/1	0/0	0/0	0/0	0/0	0/0	0/0	0/0	0/0	0/0	0/0	0/0	0/0	0/0	1/1	0/0	0/0	1/1	0/0	0/0	1/1	0/0	0/0	0/0	GTCATTTACTACTCCGAGAAAAA|upstream_gene_variant|MODIFIER|OS01G0627500|OS01G0627500|transcript|OS01T0627500-01|protein_coding||c.-4515_-4514insTTTTTCTCGGAGTAGTAAATGA|||||4376|,GTCATTTACTACTCCGAGAAAAA|upstream_gene_variant|MODIFIER|EPlOSAG00000041809|EPlOSAG00000041809|transcript|EPlOSAT00000043197|lincRNA||n.-3917_-3916insTTTTTCTCGGAGTAGTAAATGA|||||3917|,GTCATTTACTACTCCGAGAAAAA|upstream_gene_variant…
chr01	25059637	C	CGAGGGCGGTGGGAAGGCCGAGAGATAAG	13437.4	1|1	0/0	0/0	0/0	0/0	0/0	0/0	0/0	0/0	0/0	0/0	0/0	0/0	0/0	1|1	0/0	0/0	1|1	0/0	0/0	1|1	0/0	0/0	0/0	CGAGGGCGGTGGGAAGGCCGAGAGATAAG|upstream_gene_variant|MODIFIER|OS01G0627600|OS01G0627600|transcript|OS01T0627600-01|protein_coding||c.-1553_-1552insCTTATCTCTCGGCCTTCCCACCGCCCTC|||||1553|WARNING_TRANSCRIPT_NO_START_CODON,CGAGGGCGGTGGGAAGGCCGAGAGATAAG|upstream_gene_variant|MODIFIER|OS01G0627800|OS01G0627800|transcript|OS01T0627800-01|protein_coding||c.-1207_-1206insGAGGGCGGTGGGAAGGCCGAGAGATAAG|||||11…
chr01	25065808	TATTCGTATTCGTATTTGGGAGAAAATATCCCTATTCGAATTATCACTGTTCACCGCATATTCGTTTTTCTCCA	T	5097.34	1/1	0/0	0/0	0/0	0/0	0/0	0/0	0/0	0/0	0/0	0/0	0/0	0/0	0/0	1/1	0/0	0/0	1/1	0/0	0/0	1/1	0/0	0/0	0/0	T|upstream_gene_variant|MODIFIER|OS01G0627900|OS01G0627900|transcript|OS01T0627900-01|protein_coding||c.-444_-372delATTCGTATTCGTATTTGGGAGAAAATATCCCTATTCGAATTATCACTGTTCACCGCATATTCGTTTTTCTCCA|||||362|,T|upstream_gene_variant|MODIFIER|OS01G0627933|OS01G0627933|transcript|OS01T0627933-00|protein_coding||c.-4907_-4835delATTCGTATTCGTATTTGGGAGAAAATATCCCTATTCGAATTATCACTGTTCACCGCATATTCGTTTTTCTCCA|||||4907…
chr01	25069753	C	CTTTTAAATATGGTGACAATATGTA	2284.75	1|1	0/0	0/0	0/0	0/0	0/0	0/0	0/0	0/0	0/0	0/0	0/0	0/0	0/0	0/0	0/0	0/0	0/0	0/0	0/0	1|1	0/0	0/0	0/0	CTTTTAAATATGGTGACAATATGTA|upstream_gene_variant|MODIFIER|OS01G0627916|OS01G0627916|transcript|OS01T0627916-00|protein_coding||c.-2738_-2737insTACATATTGTCACCATATTTAAAA|||||1587|WARNING_TRANSCRIPT_NO_STOP_CODON,CTTTTAAATATGGTGACAATATGTA|upstream_gene_variant|MODIFIER|OS01G0627933|OS01G0627933|transcript|OS01T0627933-00|protein_coding||c.-963_-962insTTTTAAATATGGTGACAATATGTA|||||962|,CTTTTAAATATGGTGA…
chr01	25070102	A	ATAAAATAAATAATAATTTTAAAAAT	7305.51	1/1	0/0	0/0	0/0	0/0	0/0	0/0	0/0	0/0	0/0	0/0	0/0	0/0	0/0	1/1	0/0	0/0	1/1	0/0	0/0	1/1	0/0	0/0	0/0	ATAAAATAAATAATAATTTTAAAAAT|upstream_gene_variant|MODIFIER|OS01G0627916|OS01G0627916|transcript|OS01T0627916-00|protein_coding||c.-3087_-3086insATTTTTAAAATTATTATTTATTTTA|||||1936|WARNING_TRANSCRIPT_NO_STOP_CODON,ATAAAATAAATAATAATTTTAAAAAT|upstream_gene_variant|MODIFIER|OS01G0627933|OS01G0627933|transcript|OS01T0627933-00|protein_coding||c.-614_-613insTAAAATAAATAATAATTTTAAAAAT|||||613|,ATAAAATAAATA…
chr01	25071303	G	GCCTTTTCTTCTTCTTCTTCTTCTT	2331.59	0/0	0/0	0/0	0/0	0/0	0/0	0/0	0/0	0/0	0/0	0/0	0/0	0/0	0/0	1|1	0/0	0/0	0/0	0/0	0/0	1|1	0/0	0/0	0/0	GCCTTTTCTTCTTCTTCTTCTTCTT|disruptive_inframe_insertion|MODERATE|OS01G0627933|OS01G0627933|transcript|OS01T0627933-00|protein_coding|1/3|c.589_590insCTTTTCTTCTTCTTCTTCTTCTTC|p.Leu196_Leu197insProPheLeuLeuLeuLeuLeuLeu|590/1731|590/1389|197/462||INFO_REALIGN_3_PRIME,GCCTTTTCTTCTTCTTCTTCTTCTT|upstream_gene_variant|MODIFIER|OS01G0627916|OS01G0627916|transcript|OS01T0627916-00|protein_coding||c.-4288_-…
chr01	25072700	ATATGATAGTTTTTTTCTGGTAGTTG	A	10098.3	1/1	0/0	0/0	0/0	0/0	0/0	0/0	0/0	0/0	0/0	0/0	0/0	0/0	0/0	1/1	0/0	0/0	1/1	0/0	0/0	1/1	0/0	0/0	0/0	A|upstream_gene_variant|MODIFIER|OS01G0627916|OS01G0627916|transcript|OS01T0627916-00|protein_coding||c.-5709_-5685delCAACTACCAGAAAAAAACTATCATA|||||4534|WARNING_TRANSCRIPT_NO_STOP_CODON,A|upstream_gene_variant|MODIFIER|OS01G0628000|OS01G0628000|transcript|OS01T0628000-01|protein_coding||c.-3912_-3888delTATGATAGTTTTTTTCTGGTAGTTG|||||3910|WARNING_TRANSCRIPT_NO_START_CODON,A|downstream_gene_variant|…
chr01	25113656	AGGGCGTCCGTTCTGAGAAGACC	A	9955.34	1/1	0/0	0/0	0/0	0/0	0/0	0/0	0/0	0/0	0/0	0/0	0/0	0/0	0/0	1/1	0/0	0/0	1/1	0/0	0/0	1/1	0/0	0/0	0/0	A|upstream_gene_variant|MODIFIER|OS01G0628700|OS01G0628700|transcript|OS01T0628700-01|protein_coding||c.-588_-567delGGGCGTCCGTTCTGAGAAGACC|||||426|,A|intergenic_region|MODIFIER|EPlOSAG00000016358-OS01G0628700|EPlOSAG00000016358-OS01G0628700|intergenic_region|EPlOSAG00000016358-OS01G0628700|||n.25113657_25113678delGGGCGTCCGTTCTGAGAAGACC||||||
chr01	25146955	AGCCGCCGCCACCGCCTCCGGATCCACTC	A	1211.79	0/0	0/0	0/0	0/0	0/0	0/0	1/1	0/0	0/0	0/0	0/0	0/0	0/0	0/0	0/0	1/1	0/0	0/0	0/0	0/0	0/0	0/0	0/0	0/0	A|frameshift_variant|HIGH|OS01G0629750|OS01G0629750|transcript|OS01T0629750-00|protein_coding|2/2|c.206_233delGAGTGGATCCGGAGGCGGTGGCGGCGGC|p.Arg69fs|486/710|206/423|69/140||WARNING_TRANSCRIPT_NO_START_CODON,A|downstream_gene_variant|MODIFIER|OS01G0629600|OS01G0629600|transcript|OS01T0629600-01|protein_coding||c.*1057_*1084delGCCGCCGCCACCGCCTCCGGATCCACTC|||||1007|
chr01	25316281	GGATTTGAAAATTTTCAACCTAGATCTGAAAACTTTCAACTCGA	G	3140.79	0/0	0/0	0/0	0/0	0/0	0/0	1|1	0/0	0/0	0/0	0/0	0/0	0/0	0/0	0/0	1|1	0/0	0/0	0/0	0/0	0/0	0/0	0/0	0/0	G|upstream_gene_variant|MODIFIER|EPlOSAG00000013815|EPlOSAG00000013815|transcript|EPlOSAT00000015203|lincRNA||n.-2556_-2514delGATTTGAAAATTTTCAACCTAGATCTGAAAACTTTCAACTCGA|||||2556|,G|intergenic_region|MODIFIER|OS01G0632100-EPlOSAG00000013815|OS01G0632100-EPlOSAG00000013815|intergenic_region|OS01G0632100-EPlOSAG00000013815|||n.25316282_25316324delGATTTGAAAATTTTCAACCTAGATCTGAAAACTTTCAACTCGA||||||
chr01	25318104	ATGTTGGATTCAGGTATTACAAGGTCTTGTCTGTCTATGGTCTTGGATGATGAGTTGCCTATCGGTATAAATACAAAGCCCCTCAGAATGGGAGGGTAT	A	1630.79	0/0	0/0	0/0	0/0	0/0	0/0	1/1	0/0	0/0	0/0	0/0	0/0	0/0	0/0	0/0	1/1	0/0	0/0	0/0	0/0	0/0	0/0	0/0	0/0	A|upstream_gene_variant|MODIFIER|EPlOSAG00000013815|EPlOSAG00000013815|transcript|EPlOSAT00000015203|lincRNA||n.-733_-636delTGTTGGATTCAGGTATTACAAGGTCTTGTCTGTCTATGGTCTTGGATGATGAGTTGCCTATCGGTATAAATACAAAGCCCCTCAGAATGGGAGGGTAT|||||733|,A|intergenic_region|MODIFIER|OS01G0632100-EPlOSAG00000013815|OS01G0632100-EPlOSAG00000013815|intergenic_region|OS01G0632100-EPlOSAG00000013815|||n.25318105_25318202del…
chr01	25330953	CCCCTCCCGTCGCCGCCCAGTCTCCCCTCCCACCGCCGCCT	C	466.82	0/0	0/0	0/0	0/0	0/0	0/0	1/1	0/0	0/0	0/0	0/0	0/0	0/0	0/0	0/0	1/1	0/0	0/0	0/0	0/0	0/0	0/0	0/0	0/0	C|frameshift_variant|HIGH|OS01G0632700|OS01G0632700|transcript|OS01T0632700-01|protein_coding|1/3|c.118_157delCCCAGTCTCCCCTCCCACCGCCGCCTCCCTCCCGTCGCCG|p.Pro40fs|118/789|118/573|40/190||WARNING_TRANSCRIPT_NO_START_CODON&INFO_REALIGN_3_PRIME,C|5_prime_UTR_variant|MODIFIER|OS01G0632700|OS01G0632700|transcript|OS01T0632700-02|protein_coding|1/2|c.-4557_-1933delCCCAGTCTCCCCTCCCACCGCCGCCTCCCTCCCGTCGCCG…
chr01	25338016	G	GATGTTTTTTTTTTTTTGTGGACTGAGAGTTGAGTGAGACTGATTTGTTTTTTTTTTTGAGAGTTGACTGAGTTGACTGAGTTGACTGA	3909.83	0/0	0/0	0/0	0/0	0/0	0/0	1|1	0/0	0/0	0/0	0/0	0/0	0/0	0/0	0/0	1|1	0/0	0/0	0/0	0/0	0/0	0/0	0/0	0/0	GATGTTTTTTTTTTTTTGTGGACTGAGAGTTGAGTGAGACTGATTTGTTTTTTTTTTTGAGAGTTGACTGAGTTGACTGAGTTGACTGA|3_prime_UTR_variant|MODIFIER|OS01G0632700|OS01G0632700|transcript|OS01T0632700-01|protein_coding|3/3|c.*95_*96insATGTTTTTTTTTTTTTGTGGACTGAGAGTTGAGTGAGACTGATTTGTTTTTTTTTTTGAGAGTTGACTGAGTTGACTGAGTTGACTGA|||||96|WARNING_TRANSCRIPT_NO_START_CODON,GATGTTTTTTTTTTTTTGTGGACTGAGAGTTGAGTGAGACTGATTTGTTTTTTTTTTTGAGAGTTG…
chr01	25347470	TAAAAATATTTTTTGGTAACATGAATTTTTTTTAAA	T	1711.79	0/0	0/0	0/0	0/0	0/0	0/0	1/1	0/0	0/0	0/0	0/0	0/0	0/0	0/0	0/0	1/1	0/0	0/0	0/0	0/0	0/0	0/0	0/0	0/0	T|downstream_gene_variant|MODIFIER|OS01G0633000|OS01G0633000|transcript|OS01T0633000-01|protein_coding||c.*3432_*3466delTTTAAAAAAAATTCATGTTACCAAAAAATATTTTT|||||3210|,T|intergenic_region|MODIFIER|OS01G0632700-OS01G0633000|OS01G0632700-OS01G0633000|intergenic_region|OS01G0632700-OS01G0633000|||n.25347471_25347505delAAAAATATTTTTTGGTAACATGAATTTTTTTTAAA||||||
chr01	25374405	GGTTTTAAGGAGAATAAATAGAAATAATGGTAGAACAAGCAAACAAATAAAAAAAGATCCCCATTTTTAGAT	G	1857.8	0/0	0/0	0/0	0/0	0/0	0/0	1|1	0/0	0/0	0/0	0/0	0/0	0/0	0/0	0/0	1|1	0/0	0/0	0/0	0/0	0/0	0/0	0/0	0/0	G|downstream_gene_variant|MODIFIER|OS01G0633400|OS01G0633400|transcript|OS01T0633400-01|protein_coding||c.*3446_*3516delGTTTTAAGGAGAATAAATAGAAATAATGGTAGAACAAGCAAACAAATAAAAAAAGATCCCCATTTTTAGAT|||||3400|,G|intergenic_region|MODIFIER|OS01G0633400-OS01G0633500|OS01G0633400-OS01G0633500|intergenic_region|OS01G0633400-OS01G0633500|||n.25374406_25374476delGTTTTAAGGAGAATAAATAGAAATAATGGTAGAACAAGCAAACAAATA…
chr01	25376223	G	GAAATCCATCAAAACAAATAAACTCTAAAATTACGA	2444.83	0/0	0/0	0/0	0/0	0/0	0/0	1|1	0/0	0/0	0/0	0/0	0/0	0/0	0/0	0/0	1|1	0/0	0/0	0/0	0/0	0/0	0/0	0/0	0/0	GAAATCCATCAAAACAAATAAACTCTAAAATTACGA|intergenic_region|MODIFIER|OS01G0633400-OS01G0633500|OS01G0633400-OS01G0633500|intergenic_region|OS01G0633400-OS01G0633500|||n.25376223_25376224insAAATCCATCAAAACAAATAAACTCTAAAATTACGA||||||
chr01	25393069	AATTCTTTCCAAAGGAGTTGATCATTCAATTAAC	A	2387.79	0/0	0/0	0/0	0/0	0/0	0/0	1/1	0/0	0/0	0/0	0/0	0/0	0/0	0/0	0/0	1/1	0/0	0/0	0/0	0/0	0/0	0/0	0/0	0/0	A|upstream_gene_variant|MODIFIER|EPlOSAG00000009030|EPlOSAG00000009030|transcript|EPlOSAT00000010418|lincRNA||n.-2633_-2601delGTTAATTGAATGATCAACTCCTTTGGAAAGAAT|||||2601|,A|downstream_gene_variant|MODIFIER|EPlOSAG00000009047|EPlOSAG00000009047|transcript|EPlOSAT00000010435|lincRNA||n.*2601_*2633delATTCTTTCCAAAGGAGTTGATCATTCAATTAAC|||||2601|,A|intergenic_region|MODIFIER|EPlOSAG00000009030-OS01G0633…
chr01	25395908	AGGGAGTTGGGCTTACGCGTACGAGACTTTGGG	A	1934.79	0/0	0/0	0/0	0/0	0/0	0/0	1|1	0/0	0/0	0/0	0/0	0/0	0/0	0/0	0/0	1|1	0/0	0/0	0/0	0/0	0/0	0/0	0/0	0/0	A|intergenic_region|MODIFIER|EPlOSAG00000009030-OS01G0633800|EPlOSAG00000009030-OS01G0633800|intergenic_region|EPlOSAG00000009030-OS01G0633800|||n.25395909_25395940delGGGAGTTGGGCTTACGCGTACGAGACTTTGGG||||||
chr01	25398921	G	GTTTAAACGAGAGGAAGGAAA	4051.83	0/0	0/0	0/0	0/0	0/0	0/0	1/1	0/0	0/0	0/0	0/0	0/0	0/0	0/0	0/0	1/1	0/0	0/0	0/0	0/0	0/0	0/0	0/0	0/0	GTTTAAACGAGAGGAAGGAAA|downstream_gene_variant|MODIFIER|OS01G0633800|OS01G0633800|transcript|OS01T0633800-01|lincRNA||n.*3335_*3336insTTTCCTTCCTCTCGTTTAAA|||||3335|,GTTTAAACGAGAGGAAGGAAA|intergenic_region|MODIFIER|EPlOSAG00000009030-OS01G0633800|EPlOSAG00000009030-OS01G0633800|intergenic_region|EPlOSAG00000009030-OS01G0633800|||n.25398921_25398922insTTTAAACGAGAGGAAGGAAA||||||
chr01	26149710	CTATATATATATATATATATATATATATATATATATATATATATA	CTATATATATATA,C,CTATATATATATATA	8099	0/0	0/0	./.	0/0	0/0	0/0	0/0	0/0	0/0	0/0	2/2	2/2	0/0	1/1	0/0	0/0	1/1	0/0	0/0	.	0/0	3/3	1/1	0/0	C|upstream_gene_variant|MODIFIER|EPlOSAG00000013496|EPlOSAG00000013496|transcript|EPlOSAT00000014884|lincRNA||n.-202_-159delTATATATATATATATATATATATATATATATATATATATATATA|||||159|,CTATATATATATA|upstream_gene_variant|MODIFIER|EPlOSAG00000013496|EPlOSAG00000013496|transcript|EPlOSAT00000014884|lincRNA||n.-202_-171delTATATATATATATATATATATATATATATATA|||||171|,CTATATATATATATA|upstream_gene_variant|MODIF…
chr01	26513763	AATATATATATATATATATATATATATATATATATATAT	AAT,AATATATATATATATATATATATATATATATATATATATATATATAT,AATATATATATATATATATATATATATATATATATATATATATATATAT,AATATATATATATATATATATATATATATATATATATATATATATATATATAT,A	6526.57	0/0	0/0	0/0	0/0	0/0	0/0	0/0	./.	0/0	0/0	0/0	1/1	1/1	3/3	0/0	0/0	5/5	0/0	0/0	0/0	0/0	2/2	4/4	0/0	A|upstream_gene_variant|MODIFIER|OS01G0654100|OS01G0654100|transcript|OS01T0654100-01|protein_coding||c.-966_-929delATATATATATATATATATATATATATATATATATATAT|||||779|,AAT|upstream_gene_variant|MODIFIER|OS01G0654100|OS01G0654100|transcript|OS01T0654100-01|protein_coding||c.-964_-929delATATATATATATATATATATATATATATATATATAT|||||777|,AATATATATATATATATATATATATATATATATATATATATATATAT|upstream_gene_variant|M…
chr01	26628298	GGGAGGTGCTTGCTGCTGGCGCAT	G	19080.9	0/0	0/0	0/0	0/0	1|1	0/0	1|1	0/0	0/0	0/0	1|1	1|1	1|1	0/0	0/0	1|1	1|1	0/0	0/0	0/0	0/0	0/0	0/0	1|1	G|upstream_gene_variant|MODIFIER|OS01G0655800|OS01G0655800|transcript|OS01T0655800-01|protein_coding||c.-579_-557delGGAGGTGCTTGCTGCTGGCGCAT|||||578|WARNING_TRANSCRIPT_NO_START_CODON,G|intergenic_region|MODIFIER|EPlOSAG00000029600-OS01G0655800|EPlOSAG00000029600-OS01G0655800|intergenic_region|EPlOSAG00000029600-OS01G0655800|||n.26628299_26628321delGGAGGTGCTTGCTGCTGGCGCAT||||||
chr01	26867077	TTATATATATATATATATATATATA	T	2226.09	0/0	0/0	0/0	0/0	0/0	./.	0/0	0/0	0/0	0/0	0/0	0/0	0/0	0/0	0/0	0/0	1/1	0/0	0/0	0/0	0/0	0/0	0/0	0/0	T|downstream_gene_variant|MODIFIER|OS01G0659800|OS01G0659800|transcript|OS01T0659800-01|protein_coding||c.*3978_*4001delTATATATATATATATATATATATA|||||3644|,T|downstream_gene_variant|MODIFIER|EPlOSAG00000030668|EPlOSAG00000030668|transcript|EPlOSAT00000032056|lincRNA||n.*521_*544delTATATATATATATATATATATATA|||||544|,T|intergenic_region|MODIFIER|OS01G0659800-EPlOSAG00000030668|OS01G0659800-EPlOSAG000…
chr01	27070313	ACTCGCCACCGCGCCCCGTGCGCCG	A	4714.79	0/0	1/1	0/0	0/0	0/0	0/0	0/0	0/0	0/0	0/0	0/0	0/0	0/0	0/0	0/0	0/0	0/0	0/0	0/0	0/0	0/0	1/1	0/0	0/0	A|downstream_gene_variant|MODIFIER|EPlOSAG00000017417|EPlOSAG00000017417|transcript|EPlOSAT00000018805|lincRNA||n.*4629_*4652delCTCGCCACCGCGCCCCGTGCGCCG|||||4629|,A|downstream_gene_variant|MODIFIER|EPlOSAG00000003051|EPlOSAG00000003051|transcript|EPlOSAT00000004439|lincRNA||n.*1375_*1398delCGGCGCACGGGGCGCGGTGGCGAG|||||1398|,A|downstream_gene_variant|MODIFIER|EPlOSAG00000014527|EPlOSAG00000014527|…
chr01	27167158	TAAGATGGACAGTTAAACGTTGGACACGGA	T	970.93	0/0	0/0	0/0	0/0	./.	0/0	1|1	0/0	0/0	0/0	./.	1|1	0/0	0/0	0/0	./.	0/0	0/0	0/0	0/0	0/0	0/0	0/0	0/0	T|upstream_gene_variant|MODIFIER|EPlOSAG00000008445|EPlOSAG00000008445|transcript|EPlOSAT00000009833|lincRNA||n.-1212_-1184delTCCGTGTCCAACGTTTAACTGTCCATCTT|||||1184|,T|upstream_gene_variant|MODIFIER|OS01G0665200|OS01G0665200|transcript|OS01T0665200-01|protein_coding||c.-4906_-4878delAAGATGGACAGTTAAACGTTGGACACGGA|||||4131|,T|upstream_gene_variant|MODIFIER|OS01G0665200|OS01G0665200|transcript|OS01T…
chr01	27430080	AGCGGCGCAGCAGAGGGCGGCAGCGTCGCGGCGCACGTAGGGGCGGCGCGAGAATT	A	4460.42	0/0	1/1	0/0	0/0	0/0	1/1	0/0	./.	0/0	./.	0/0	0/0	0/0	0/0	0/0	0/0	1/1	0/0	0/0	0/0	0/0	1/1	0/0	0/0	A|downstream_gene_variant|MODIFIER|EPlOSAG00000020070|EPlOSAG00000020070|transcript|EPlOSAT00000021458|lincRNA||n.*4425_*4479delAATTCTCGCGCCGCCCCTACGTGCGCCGCGACGCTGCCGCCCTCTGCTGCGCCGC|||||4479|,A|intergenic_region|MODIFIER|EPlOSAG00000021087-EPlOSAG00000020070|EPlOSAG00000021087-EPlOSAG00000020070|intergenic_region|EPlOSAG00000021087-EPlOSAG00000020070|||n.27430081_27430135delGCGGCGCAGCAGAGGGCGGC…
chr01	27753214	TATTTCGTTCGTACATACGTATAGCTTTTGCCTTTTTTTC	T	2296.06	0/0	0/0	0/0	0/0	0/0	0/0	0/0	0/0	0/0	0/0	0/0	0/0	0/0	0/0	0/0	0/0	0/0	0/0	0/0	1/1	0/0	0/0	0/0	0/0	T|upstream_gene_variant|MODIFIER|EPlOSAG00000000599|EPlOSAG00000000599|transcript|EPlOSAT00000001987|lincRNA||n.-3956_-3918delGAAAAAAAGGCAAAAGCTATACGTATGTACGAACGAAAT|||||3918|,T|upstream_gene_variant|MODIFIER|EPlOSAG00000010417|EPlOSAG00000010417|transcript|EPlOSAT00000011805|lincRNA||n.-3956_-3918delGAAAAAAAGGCAAAAGCTATACGTATGTACGAACGAAAT|||||3918|,T|downstream_gene_variant|MODIFIER|EPlOSAG00000…
chr01	28043118	CGCGCTACCAGCAGAGCCTGCG	C	234.51	0/0	0/0	0/0	0/0	0/0	0/0	0/0	0/0	0/0	0/0	0/0	0/0	0/0	0/0	0/0	0/0	0/0	0/0	0/0	0/0	0/0	0/0	0/0	1/1	C|intron_variant|MODIFIER|OS01G0681000|OS01G0681000|transcript|OS01T0681000-01|protein_coding|1/6|c.295-7916_295-7896delCGCAGGCTCTGCTGGTAGCGC||||||
chr01	28251981	T	TGGGCGAGAGCGCGCGCGCGCGAC	1939.1	0/0	0/0	0/0	0/0	0/0	0/0	0/0	0/0	0/0	0/0	0/0	1/1	0/0	0/0	0/0	1/1	0/0	0/0	0/0	0/0	0/0	0/0	0/0	0/0	TGGGCGAGAGCGCGCGCGCGCGAC|downstream_gene_variant|MODIFIER|OS01G0685300|OS01G0685300|transcript|OS01T0685300-01|protein_coding||c.*4384_*4385insGGGCGAGAGCGCGCGCGCGCGAC|||||3961|,TGGGCGAGAGCGCGCGCGCGCGAC|downstream_gene_variant|MODIFIER|OS01G0685400|OS01G0685400|transcript|OS01T0685400-01|protein_coding||c.*689_*690insGGGCGAGAGCGCGCGCGCGCGAC|||||474|WARNING_TRANSCRIPT_NO_START_CODON,TGGGCGAGAGCGCGC…
chr01	28315513	TTATATATATATATATATATATATATATATATA	T,TTATATATATATATATATATATATATATATATATATATATATATATATA,TTATATATATATATATATATATATATATATATATATATATATATATA	6570	0/0	0/0	0/0	0/0	./.	0/0	1/1	0/0	0/0	0/0	0/0	1/1	0/0	.	0/0	1/1	1/1	0/0	0/0	0/0	./.	2/2	3/3	0/0	T|upstream_gene_variant|MODIFIER|OS01G0686400|OS01G0686400|transcript|OS01T0686400-01|protein_coding||c.-984_-953delTATATATATATATATATATATATATATATATA|||||983|WARNING_TRANSCRIPT_NO_START_CODON,TTATATATATATATATATATATATATATATATATATATATATATATA|upstream_gene_variant|MODIFIER|OS01G0686400|OS01G0686400|transcript|OS01T0686400-01|protein_coding||c.-953_-952insTATATATATATATA|||||951|WARNING_TRANSCRIPT_NO_S…
chr01	28588073	C	CTGGTTCCGGTTTTTTCCGGTCGAACCGCTGG	4800.37	0/0	0/0	0/0	1/1	0/0	0/0	1/1	0/0	0/0	0/0	0/0	0/0	0/0	0/0	0/0	1/1	1/1	0/0	0/0	0/0	0/0	0/0	0/0	0/0	CTGGTTCCGGTTTTTTCCGGTCGAACCGCTGG|upstream_gene_variant|MODIFIER|OS01G0692700|OS01G0692700|transcript|OS01T0692700-01|protein_coding||c.-1576_-1575insCCAGCGGTTCGACCGGAAAAAACCGGAACCA|||||1574|WARNING_TRANSCRIPT_NO_START_CODON,CTGGTTCCGGTTTTTTCCGGTCGAACCGCTGG|intergenic_region|MODIFIER|OS01G0692700-OS01G0693100|OS01G0692700-OS01G0693100|intergenic_region|OS01G0692700-OS01G0693100|||n.28588073_285880…
chr01	29019501	T	TCCATGTGAAAATCGATACCTTGGAATACTACAGAGTGAAGTGCTA	10919	0/0	0/0	1/1	1/1	0/0	0/0	1/1	0/0	0/0	0/0	0/0	1/1	0/0	0/0	0/0	1/1	0/0	0/0	0/0	0/0	0/0	0/0	0/0	0/0	TCCATGTGAAAATCGATACCTTGGAATACTACAGAGTGAAGTGCTA|upstream_gene_variant|MODIFIER|EPlOSAG00000018227|EPlOSAG00000018227|transcript|EPlOSAT00000019615|lincRNA||n.-3198_-3197insTAGCACTTCACTCTGTAGTATTCCAAGGTATCGATTTTCACATGG|||||3198|,TCCATGTGAAAATCGATACCTTGGAATACTACAGAGTGAAGTGCTA|upstream_gene_variant|MODIFIER|OS01G0700900|OS01G0700900|transcript|OS01T0700900-01|protein_coding||c.-1343_-1342insCCATGTGAA…
chr01	29038723	TATAATAATAATAATAATAATAATA	T	2676.63	0/0	0/0	1/1	0/0	0/0	0/0	0/0	0/0	0/0	0/0	0/0	1/1	0/0	0/0	0/0	0/0	0/0	0/0	0/0	0/0	0/0	0/0	0/0	0/0	T|upstream_gene_variant|MODIFIER|EPlOSAG00000012270|EPlOSAG00000012270|transcript|EPlOSAT00000013658|lincRNA||n.-2466_-2443delTATTATTATTATTATTATTATTAT|||||2443|,T|upstream_gene_variant|MODIFIER|EPlOSAG00000032178|EPlOSAG00000032178|transcript|EPlOSAT00000033566|lincRNA||n.-82_-59delTATTATTATTATTATTATTATTAT|||||59|,T|upstream_gene_variant|MODIFIER|OS01G0701400|OS01G0701400|transcript|OS01T0701400-…
chr01	30029446	G	GCTGGTAGGATACGAGCAAAGGAAAT	8892.77	1|1	0/0	0/0	0/0	0/0	0/0	0/0	0/0	0/0	0/0	0/0	0/0	0/0	0/0	0/0	0/0	0/0	0/0	0/0	0/0	1|1	0/0	0/0	1|1	GCTGGTAGGATACGAGCAAAGGAAAT|upstream_gene_variant|MODIFIER|OS01G0720400|OS01G0720400|transcript|OS01T0720400-01|protein_coding||c.-3066_-3065insATTTCCTTTGCTCGTATCCTACCAG|||||2982|,GCTGGTAGGATACGAGCAAAGGAAAT|upstream_gene_variant|MODIFIER|OS01G0720500|OS01G0720500|transcript|OS01T0720500-01|protein_coding||c.-1635_-1634insCTGGTAGGATACGAGCAAAGGAAAT|||||1551|,GCTGGTAGGATACGAGCAAAGGAAAT|upstream_gene_…
chr01	30042433	ACGCAGAGATAAAGTTTACCTGTTTT	A	8943.73	1/1	0/0	0/0	0/0	0/0	0/0	0/0	0/0	0/0	0/0	0/0	0/0	0/0	0/0	0/0	0/0	0/0	0/0	0/0	0/0	1/1	0/0	0/0	1/1	A|upstream_gene_variant|MODIFIER|OS01G0720600|OS01G0720600|transcript|OS01T0720600-01|protein_coding||c.-1300_-1276delAAAACAGGTAAACTTTATCTCTGCG|||||1009|,A|upstream_gene_variant|MODIFIER|OS01G0720700|OS01G0720700|transcript|OS01T0720700-00|protein_coding||c.-1012_-988delCGCAGAGATAAAGTTTACCTGTTTT|||||1012|,A|upstream_gene_variant|MODIFIER|OS01G0720600|OS01G0720600|transcript|OS01T0720600-02|protei…
chr01	30045006	GAGGTACCATGAGGTATCAAAATTTACACTAA	G	4533.71	1|1	0/0	0/0	0/0	0/0	0/0	0/0	0/0	0/0	0/0	0/0	0/0	0/0	0/0	0/0	0/0	0/0	0/0	0/0	0/0	1|1	0/0	0/0	1|1	G|upstream_gene_variant|MODIFIER|OS01G0720600|OS01G0720600|transcript|OS01T0720600-01|protein_coding||c.-3879_-3849delTTAGTGTAAATTTTGATACCTCATGGTACCT|||||3582|,G|upstream_gene_variant|MODIFIER|EPlOSAG00000016502|EPlOSAG00000016502|transcript|EPlOSAT00000017890|lincRNA||n.-192_-162delTTAGTGTAAATTTTGATACCTCATGGTACCT|||||162|,G|upstream_gene_variant|MODIFIER|OS01G0720800|OS01G0720800|transcript|OS01…
chr01	30045156	C	CGACCATGCCGTAGATAACCATTTT	7931.77	1/1	0/0	0/0	0/0	0/0	0/0	0/0	0/0	0/0	0/0	0/0	0/0	0/0	0/0	0/0	0/0	0/0	0/0	0/0	0/0	1/1	0/0	0/0	1/1	CGACCATGCCGTAGATAACCATTTT|upstream_gene_variant|MODIFIER|OS01G0720600|OS01G0720600|transcript|OS01T0720600-01|protein_coding||c.-3999_-3998insAAAATGGTTATCTACGGCATGGTC|||||3732|,CGACCATGCCGTAGATAACCATTTT|upstream_gene_variant|MODIFIER|EPlOSAG00000016502|EPlOSAG00000016502|transcript|EPlOSAT00000017890|lincRNA||n.-312_-311insAAAATGGTTATCTACGGCATGGTC|||||312|,CGACCATGCCGTAGATAACCATTTT|upstream_gene_…
chr01	30051925	T	TTTTTCTTTTTTCTCCGATTAATGTGGGAATTTC	3693.77	1/1	0/0	0/0	0/0	0/0	0/0	0/0	0/0	0/0	0/0	0/0	0/0	0/0	0/0	0/0	0/0	0/0	0/0	0/0	0/0	1/1	0/0	0/0	1/1	TTTTTCTTTTTTCTCCGATTAATGTGGGAATTTC|upstream_gene_variant|MODIFIER|OS01G0720900|OS01G0720900|transcript|OS01T0720900-00|protein_coding||c.-3642_-3641insTTTTCTTTTTTCTCCGATTAATGTGGGAATTTC|||||3641|,TTTTTCTTTTTTCTCCGATTAATGTGGGAATTTC|upstream_gene_variant|MODIFIER|EPlOSAG00000012429|EPlOSAG00000012429|transcript|EPlOSAT00000013817|lincRNA||n.-4684_-4683insTTTTCTTTTTTCTCCGATTAATGTGGGAATTTC|||||4683|,T…
chr01	30062359	GAGGTGGAGGTCGCCAGTTTTC	G	7058.73	1/1	0/0	0/0	0/0	0/0	0/0	0/0	0/0	0/0	0/0	0/0	0/0	0/0	0/0	0/0	0/0	0/0	0/0	0/0	0/0	1/1	0/0	0/0	1/1	G|upstream_gene_variant|MODIFIER|OS01G0720801|OS01G0720801|transcript|OS01T0720801-01|protein_coding||c.-6031_-6011delGAAAACTGGCGACCTCCACCT|||||4888|,G|upstream_gene_variant|MODIFIER|EPlOSAG00000040506|EPlOSAG00000040506|transcript|EPlOSAT00000041894|lincRNA||n.-102_-82delAGGTGGAGGTCGCCAGTTTTC|||||102|,G|upstream_gene_variant|MODIFIER|OS01G0721100|OS01G0721100|transcript|OS01T0721100-01|protein_c…
chr01	30072225	AAAATTCGAAATTAAAAAAAACATGGAAAGAAGAGTCTAAAGTCATTATAGGAATACAATTTAAAAGTAACTG	A	7933.4	0/0	0/0	0/0	0/0	1/1	1/1	1/1	1/1	0/0	1/1	0/0	1/1	0/0	0/0	0/0	1/1	0/0	0/0	0/0	0/0	0/0	0/0	0/0	0/0	A|upstream_gene_variant|MODIFIER|EPlOSAG00000041796|EPlOSAG00000041796|transcript|EPlOSAT00000043184|lincRNA||n.-4963_-4892delCAGTTACTTTTAAATTGTATTCCTATAATGACTTTAGACTCTTCTTTCCATGTTTTTTTTAATTTCGAATTT|||||4892|,A|upstream_gene_variant|MODIFIER|OS01G0721300|OS01G0721300|transcript|OS01T0721300-00|protein_coding||c.-3398_-3327delAAATTCGAAATTAAAAAAAACATGGAAAGAAGAGTCTAAAGTCATTATAGGAATACAATTTAAAAGTAACTG…
chr01	30073946	ACTTCCCCTTTCCACAGCCTTCTCGACATGT	A	677.83	1/1	0/0	0/0	0/0	0/0	0/0	0/0	0/0	0/0	0/0	0/0	0/0	0/0	0/0	0/0	0/0	0/0	0/0	0/0	0/0	1/1	0/0	0/0	0/0	A|upstream_gene_variant|MODIFIER|OS01G0721300|OS01G0721300|transcript|OS01T0721300-00|protein_coding||c.-1677_-1648delCTTCCCCTTTCCACAGCCTTCTCGACATGT|||||1677|,A|downstream_gene_variant|MODIFIER|OS01G0721200|OS01G0721200|transcript|OS01T0721200-00|protein_coding||c.*3816_*3845delCTTCCCCTTTCCACAGCCTTCTCGACATGT|||||3816|,A|downstream_gene_variant|MODIFIER|EPlOSAG00000016094|EPlOSAG00000016094|transc…
chr01	30077737	C	CTCGCTCCGCTCGAGCCAGCCGCCCA	2598.75	1|1	0/0	0/0	0/0	0/0	0/0	0/0	0/0	0/0	0/0	0/0	0/0	0/0	0/0	0/0	0/0	0/0	0/0	0/0	0/0	1|1	0/0	0/0	1|1	CTCGCTCCGCTCGAGCCAGCCGCCCA|upstream_gene_variant|MODIFIER|OS01G0721400|OS01G0721400|transcript|OS01T0721400-01|protein_coding||c.-2026_-2025insTCGCTCCGCTCGAGCCAGCCGCCCA|||||1936|,CTCGCTCCGCTCGAGCCAGCCGCCCA|upstream_gene_variant|MODIFIER|EPlOSAG00000021603|EPlOSAG00000021603|transcript|EPlOSAT00000022991|lincRNA||n.-2679_-2678insTCGCTCCGCTCGAGCCAGCCGCCCA|||||2678|,CTCGCTCCGCTCGAGCCAGCCGCCCA|downst…
chr01	30093317	A	AACATTGTCAACTATTTTTTTTTTG	7235.77	1/1	0/0	0/0	0/0	0/0	0/0	0/0	0/0	0/0	0/0	0/0	0/0	0/0	0/0	0/0	0/0	0/0	0/0	0/0	0/0	1/1	0/0	0/0	1/1	AACATTGTCAACTATTTTTTTTTTG|upstream_gene_variant|MODIFIER|OS01G0721700|OS01G0721700|transcript|OS01T0721700-00|protein_coding||c.-4447_-4446insCAAAAAAAAAATAGTTGACAATGT|||||4447|,AACATTGTCAACTATTTTTTTTTTG|upstream_gene_variant|MODIFIER|EPlOSAG00000017261|EPlOSAG00000017261|transcript|EPlOSAT00000018649|lincRNA||n.-1567_-1566insACATTGTCAACTATTTTTTTTTTG|||||1566|,AACATTGTCAACTATTTTTTTTTTG|downstream_…
chr01	30124018	CCCGGTTTTTTAGGACAGATTTGGTTTTTTTGT	C	5412.74	1|1	0/0	0/0	0/0	0/0	0/0	0/0	0/0	0/0	0/0	0/0	0/0	0/0	0/0	0/0	0/0	0/0	0/0	0/0	0/0	1|1	0/0	0/0	1|1	C|upstream_gene_variant|MODIFIER|OS01G0722550|OS01G0722550|transcript|OS01T0722550-00|protein_coding||c.-1843_-1812delCCGGTTTTTTAGGACAGATTTGGTTTTTTTGT|||||1554|,C|intergenic_region|MODIFIER|OS01G0722300-OS01G0722550|OS01G0722300-OS01G0722550|intergenic_region|OS01G0722300-OS01G0722550|||n.30124019_30124050delCCGGTTTTTTAGGACAGATTTGGTTTTTTTGT||||||
chr01	30130093	C	CTATAGAGTAAATCCGAGATTTAATTGATT	7599.77	1/1	0/0	0/0	0/0	0/0	0/0	0/0	0/0	0/0	0/0	0/0	0/0	0/0	0/0	0/0	0/0	0/0	0/0	0/0	0/0	1/1	0/0	0/0	1/1	CTATAGAGTAAATCCGAGATTTAATTGATT|upstream_gene_variant|MODIFIER|OS01G0722700|OS01G0722700|transcript|OS01T0722700-01|protein_coding||c.-1343_-1342insTATAGAGTAAATCCGAGATTTAATTGATT|||||1295|,CTATAGAGTAAATCCGAGATTTAATTGATT|downstream_gene_variant|MODIFIER|OS01G0722550|OS01G0722550|transcript|OS01T0722550-00|protein_coding||c.*2080_*2081insTATAGAGTAAATCCGAGATTTAATTGATT|||||1101|,CTATAGAGTAAATCCGAGATTTA…
chr01	30158845	C	CATAAGAAGCACACTACAAAATATTGCAGAT	7388.77	1/1	0/0	0/0	0/0	0/0	0/0	0/0	0/0	0/0	0/0	0/0	0/0	0/0	0/0	0/0	0/0	0/0	0/0	0/0	0/0	1/1	0/0	0/0	1/1	CATAAGAAGCACACTACAAAATATTGCAGAT|upstream_gene_variant|MODIFIER|EPlOSAG00000048656|EPlOSAG00000048656|transcript|EPlOSAT00000050044|lincRNA||n.-1468_-1467insATAAGAAGCACACTACAAAATATTGCAGAT|||||1467|,CATAAGAAGCACACTACAAAATATTGCAGAT|upstream_gene_variant|MODIFIER|EPlOSAG00000037180|EPlOSAG00000037180|transcript|EPlOSAT00000038568|lincRNA||n.-2150_-2149insATAAGAAGCACACTACAAAATATTGCAGAT|||||2149|,CATAA…
chr01	30160160	CATATACAAAATTTATATATGTGTATACAAAGTTT	C	2618.75	1/1	0/0	0/0	0/0	0/0	0/0	0/0	0/0	0/0	0/0	0/0	0/0	0/0	0/0	0/0	0/0	0/0	0/0	0/0	0/0	1/1	0/0	0/0	1/1	C|upstream_gene_variant|MODIFIER|OS01G0723200|OS01G0723200|transcript|OS01T0723200-01|protein_coding||c.-512_-479delAAACTTTGTATACACATATATAAATTTTGTATAT|||||392|,C|upstream_gene_variant|MODIFIER|EPlOSAG00000048656|EPlOSAG00000048656|transcript|EPlOSAT00000050044|lincRNA||n.-152_-119delATATACAAAATTTATATATGTGTATACAAAGTTT|||||152|,C|upstream_gene_variant|MODIFIER|EPlOSAG00000037180|EPlOSAG00000037180|…
chr01	30163120	T	TTCAAAATTTTTTGAATAAGACGAGTGG	2818.77	1/1	0/0	0/0	0/0	0/0	0/0	0/0	0/0	0/0	0/0	0/0	0/0	0/0	0/0	0/0	0/0	0/0	0/0	0/0	0/0	1/1	0/0	0/0	1/1	TTCAAAATTTTTTGAATAAGACGAGTGG|upstream_gene_variant|MODIFIER|OS01G0723200|OS01G0723200|transcript|OS01T0723200-01|protein_coding||c.-3439_-3438insCCACTCGTCTTATTCAAAAAATTTTGA|||||3352|,TTCAAAATTTTTTGAATAAGACGAGTGG|upstream_gene_variant|MODIFIER|EPlOSAG00000038617|EPlOSAG00000038617|transcript|EPlOSAT00000040005|lincRNA||n.-2021_-2020insCCACTCGTCTTATTCAAAAAATTTTGA|||||2021|,TTCAAAATTTTTTGAATAAGACGAG…
chr01	30177868	CTACTCCCTCCGTCCCAAAAAAAAAAAACTCAATCCTGGGTTTTTTTTGGGACGAAGGGAG	C	4117.77	1|1	0/0	0/0	0/0	0/0	0/0	0/0	0/0	0/0	0/0	0/0	0/0	0/0	0/0	0/0	0/0	0/0	0/0	0/0	0/0	1|1	0/0	0/0	1|1	C|upstream_gene_variant|MODIFIER|EPlOSAG00000047333|EPlOSAG00000047333|transcript|EPlOSAT00000048721|lincRNA||n.-781_-722delTACTCCCTCCGTCCCAAAAAAAAAAAACTCAATCCTGGGTTTTTTTTGGGACGAAGGGAG|||||781|,C|upstream_gene_variant|MODIFIER|OS01G0723600|OS01G0723600|transcript|OS01T0723600-01|protein_coding||c.-2838_-2779delTACTCCCTCCGTCCCAAAAAAAAAAAACTCAATCCTGGGTTTTTTTTGGGACGAAGGGAG|||||2712|,C|upstream_gene_…
chr01	30197927	AGACTCGTCAATATATAGCTATATATTTC	A	5159.73	1/1	0/0	0/0	0/0	0/0	0/0	0/0	0/0	0/0	0/0	0/0	0/0	0/0	0/0	0/0	0/0	0/0	0/0	0/0	0/0	1/1	0/0	0/0	1/1	A|upstream_gene_variant|MODIFIER|OS01G0723800|OS01G0723800|transcript|OS01T0723800-01|protein_coding||c.-2744_-2717delGAAATATATAGCTATATATTGACGAGTC|||||2588|,A|intergenic_region|MODIFIER|OS01G0723800-EPlOSAG00000002476|OS01G0723800-EPlOSAG00000002476|intergenic_region|OS01G0723800-EPlOSAG00000002476|||n.30197928_30197955delGACTCGTCAATATATAGCTATATATTTC||||||
chr01	30213166	GGCACGGCGTTCACAGCCGGCGCCGGAGCATTGACGAGGAGGGAGGAGGGAA	G	4345.71	1|1	0/0	0/0	0/0	0/0	0/0	0/0	0/0	0/0	0/0	0/0	0/0	0/0	0/0	0/0	0/0	0/0	0/0	0/0	0/0	1|1	0/0	0/0	1|1	G|upstream_gene_variant|MODIFIER|OS01G0724400|OS01G0724400|transcript|OS01T0724400-00|protein_coding||c.-964_-914delGCACGGCGTTCACAGCCGGCGCCGGAGCATTGACGAGGAGGGAGGAGGGAA|||||964|,G|upstream_gene_variant|MODIFIER|EPlOSAG00000029878|EPlOSAG00000029878|transcript|EPlOSAT00000031266|lincRNA||n.-1796_-1746delGCACGGCGTTCACAGCCGGCGCCGGAGCATTGACGAGGAGGGAGGAGGGAA|||||1796|,G|upstream_gene_variant|MODIFIER|O…
chr01	30228764	ATATATATATATATATATATATATATATATATATATATATAT	A	4116	1|1	0/0	./.	./.	./.	./.	./.	./.	./.	./.	0/0	./.	./.	0/0	./.	./.	./.	./.	./.	./.	1|1	0/0	0/0	1|1	A|upstream_gene_variant|MODIFIER|EPlOSAG00000024165|EPlOSAG00000024165|transcript|EPlOSAT00000025553|lincRNA||n.-277_-237delTATATATATATATATATATATATATATATATATATATATAT|||||277|,A|upstream_gene_variant|MODIFIER|EPlOSAG00000019151|EPlOSAG00000019151|transcript|EPlOSAT00000020539|lincRNA||n.-2739_-2699delTATATATATATATATATATATATATATATATATATATATAT|||||2739|,A|upstream_gene_variant|MODIFIER|EPlOSAG000000…
chr01	30229086	C	CTATCTTTAGTCCCGGGTGAAA	2885.77	1/1	0/0	0/0	0/0	0/0	0/0	0/0	0/0	0/0	0/0	0/0	0/0	0/0	0/0	0/0	0/0	0/0	0/0	0/0	0/0	1/1	0/0	0/0	1/1	CTATCTTTAGTCCCGGGTGAAA|upstream_gene_variant|MODIFIER|EPlOSAG00000019151|EPlOSAG00000019151|transcript|EPlOSAT00000020539|lincRNA||n.-2418_-2417insTATCTTTAGTCCCGGGTGAAA|||||2417|,CTATCTTTAGTCCCGGGTGAAA|upstream_gene_variant|MODIFIER|EPlOSAG00000029732|EPlOSAG00000029732|transcript|EPlOSAT00000031120|lincRNA||n.-2489_-2488insTATCTTTAGTCCCGGGTGAAA|||||2488|,CTATCTTTAGTCCCGGGTGAAA|upstream_gene_vari…
chr01	30229561	A	ACCGCCGCGCGGCGCTGCCCGCCATCGCACCGCCCTGCGTGCCG	2545.63	./.	0/0	0/0	0/0	0/0	./.	0/0	0/0	0/0	0/0	0/0	1/1	0/0	0/0	0/0	0/0	0/0	0/0	0/0	0/0	./.	0/0	0/0	0/0	ACCGCCGCGCGGCGCTGCCCGCCATCGCACCGCCCTGCGTGCCG|upstream_gene_variant|MODIFIER|EPlOSAG00000029355|EPlOSAG00000029355|transcript|EPlOSAT00000030743|lincRNA||n.-322_-321insCGGCACGCAGGGCGGTGCGATGGCGGGCAGCGCCGCGCGGCGG|||||322|,ACCGCCGCGCGGCGCTGCCCGCCATCGCACCGCCCTGCGTGCCG|upstream_gene_variant|MODIFIER|EPlOSAG00000019151|EPlOSAG00000019151|transcript|EPlOSAT00000020539|lincRNA||n.-1943_-1942insCCGCCGCGCG…
chr01	30229572	G	GCCTGCCATCGCGCCGCCCTGTGC	1505.71	./.	0/0	0/0	0/0	0/0	./.	0/0	0/0	0/0	0/0	0/0	0/0	0/0	0/0	0/0	0/0	0/0	0/0	0/0	./.	./.	0/0	0/0	1|1	GCCTGCCATCGCGCCGCCCTGTGC|upstream_gene_variant|MODIFIER|EPlOSAG00000029355|EPlOSAG00000029355|transcript|EPlOSAT00000030743|lincRNA||n.-333_-332insGCACAGGGCGGCGCGATGGCAGG|||||333|,GCCTGCCATCGCGCCGCCCTGTGC|upstream_gene_variant|MODIFIER|EPlOSAG00000019151|EPlOSAG00000019151|transcript|EPlOSAT00000020539|lincRNA||n.-1932_-1931insCCTGCCATCGCGCCGCCCTGTGC|||||1931|,GCCTGCCATCGCGCCGCCCTGTGC|upstream_ge…
chr01	30231076	CCGGCGAGGCCCGCGAGGCGGTAGGCGGCCGGGCAGGCGGG	C	873.15	1/1	./.	0/0	./.	./.	./.	0/0	./.	0/0	./.	0/0	0/0	0/0	0/0	0/0	0/0	0/0	0/0	0/0	./.	./.	0/0	0/0	1/1	C|upstream_gene_variant|MODIFIER|EPlOSAG00000029355|EPlOSAG00000029355|transcript|EPlOSAT00000030743|lincRNA||n.-1876_-1837delCCCGCCTGCCCGGCCGCCTACCGCCTCGCGGGCCTCGCCG|||||1837|,C|upstream_gene_variant|MODIFIER|EPlOSAG00000019151|EPlOSAG00000019151|transcript|EPlOSAT00000020539|lincRNA||n.-427_-388delCGGCGAGGCCCGCGAGGCGGTAGGCGGCCGGGCAGGCGGG|||||427|,C|upstream_gene_variant|MODIFIER|EPlOSAG00000029…
chr01	30232520	C	CACATAAGCTGTTCCAGAATGTAGTTGTCTAA	7390.77	1/1	0/0	0/0	0/0	0/0	0/0	0/0	0/0	0/0	0/0	0/0	0/0	0/0	0/0	0/0	0/0	0/0	0/0	0/0	0/0	1/1	0/0	0/0	1/1	CACATAAGCTGTTCCAGAATGTAGTTGTCTAA|upstream_gene_variant|MODIFIER|EPlOSAG00000029355|EPlOSAG00000029355|transcript|EPlOSAT00000030743|lincRNA||n.-3281_-3280insTTAGACAACTACATTCTGGAACAGCTTATGT|||||3281|,CACATAAGCTGTTCCAGAATGTAGTTGTCTAA|upstream_gene_variant|MODIFIER|OS01G0725000|OS01G0725000|transcript|OS01T0725000-01|protein_coding||c.-3806_-3805insACATAAGCTGTTCCAGAATGTAGTTGTCTAA|||||3609|WARNING_TR…
chr01	30236118	C	CCACAAGACGCCGGCGTAGCCTGAGATAGA	5468.77	1/1	0/0	0/0	0/0	0/0	0/0	0/0	0/0	0/0	0/0	0/0	0/0	0/0	0/0	0/0	0/0	0/0	0/0	0/0	0/0	1|1	0/0	0/0	1|1	CCACAAGACGCCGGCGTAGCCTGAGATAGA|upstream_gene_variant|MODIFIER|OS01G0725000|OS01G0725000|transcript|OS01T0725000-01|protein_coding||c.-208_-207insCACAAGACGCCGGCGTAGCCTGAGATAGA|||||11|WARNING_TRANSCRIPT_NO_START_CODON,CCACAAGACGCCGGCGTAGCCTGAGATAGA|downstream_gene_variant|MODIFIER|EPlOSAG00000019151|EPlOSAG00000019151|transcript|EPlOSAT00000020539|lincRNA||n.*4444_*4445insCACAAGACGCCGGCGTAGCCTGAGAT…
chr01	30236691	CTGTAATCTTGAGAGTAATTTGGT	C	5837.73	1/1	0/0	0/0	0/0	0/0	0/0	0/0	0/0	0/0	0/0	0/0	0/0	0/0	0/0	0/0	0/0	0/0	0/0	0/0	0/0	1/1	0/0	0/0	1/1	C|3_prime_UTR_variant|MODIFIER|OS01G0725000|OS01G0725000|transcript|OS01T0725000-01|protein_coding|2/2|c.*158_*180delATCTTGAGAGTAATTTGGTTGTA|||||158|WARNING_TRANSCRIPT_NO_START_CODON&INFO_REALIGN_3_PRIME,C|downstream_gene_variant|MODIFIER|EPlOSAG00000024099|EPlOSAG00000024099|transcript|EPlOSAT00000025487|lincRNA||n.*4928_*4950delTGTAATCTTGAGAGTAATTTGGT|||||4928|
chr01	30241649	ATAAAAAAAAATAAAAAAAAT	A	2958.73	1|1	0/0	0/0	0/0	0/0	0/0	0/0	0/0	0/0	0/0	0/0	0/0	0/0	0/0	0/0	0/0	0/0	0/0	0/0	0/0	1|1	0/0	0/0	1|1	A|upstream_gene_variant|MODIFIER|OS01G0725400|OS01G0725400|transcript|OS01T0725400-01|protein_coding||c.-415_-396delTAAAAAAAAATAAAAAAAAT|||||304|,A|downstream_gene_variant|MODIFIER|OS01G0725000|OS01G0725000|transcript|OS01T0725000-01|protein_coding||c.*5112_*5131delTAAAAAAAAATAAAAAAAAT|||||4874|WARNING_TRANSCRIPT_NO_START_CODON,A|intergenic_region|MODIFIER|OS01G0725000-OS01G0725400|OS01G0725000-O…
chr01	30245785	GATTTCGTAGTAAAACTCTTGTTTGAATTGAGGCCCCAACAGAGCAGATCTTGCCT	G	3622.73	1/1	0/0	0/0	0/0	0/0	0/0	0/0	0/0	0/0	0/0	0/0	0/0	0/0	0/0	0/0	0/0	0/0	0/0	0/0	0/0	1/1	0/0	0/0	1/1	G|intron_variant|MODIFIER|OS01G0725400|OS01G0725400|transcript|OS01T0725400-01|protein_coding|2/2|c.399+3229_399+3283delATTTCGTAGTAAAACTCTTGTTTGAATTGAGGCCCCAACAGAGCAGATCTTGCCT||||||
chr01	30263088	CGCGTGCCCGGGGCTAGCATAGT	C	2657.73	1/1	0/0	0/0	0/0	0/0	0/0	0/0	0/0	0/0	0/0	0/0	0/0	0/0	0/0	0/0	0/0	0/0	0/0	0/0	0/0	1/1	0/0	0/0	1/1	C|3_prime_UTR_variant|MODIFIER|OS01G0725800|OS01G0725800|transcript|OS01T0725800-01|protein_coding|6/6|c.*727_*748delGTGCCCGGGGCTAGCATAGTGC|||||1892|INFO_REALIGN_3_PRIME,C|downstream_gene_variant|MODIFIER|OS01G0725900|OS01G0725900|transcript|OS01T0725900-01|protein_coding||c.*600_*621delACTATGCTAGCCCCGGGCACGC|||||294|WARNING_TRANSCRIPT_NO_START_CODON
chr01	30277586	TACTGTCATAGAACCTTAAGTGTATGGTTTGTGTGAGTTTAGGGATAC	T	4664.73	1|1	0/0	0/0	0/0	0/0	0/0	0/0	0/0	0/0	0/0	0/0	0/0	0/0	0/0	0/0	0/0	0/0	0/0	0/0	0/0	1|1	0/0	0/0	1|1	T|upstream_gene_variant|MODIFIER|OS01G0726100|OS01G0726100|transcript|OS01T0726100-01|protein_coding||c.-3616_-3570delGTATCCCTAAACTCACACAAACCATACACTTAAGGTTCTATGACAGT|||||3509|,T|upstream_gene_variant|MODIFIER|EPlOSAG00000026281|EPlOSAG00000026281|transcript|EPlOSAT00000027669|lincRNA||n.-1401_-1355delGTATCCCTAAACTCACACAAACCATACACTTAAGGTTCTATGACAGT|||||1355|,T|upstream_gene_variant|MODIFIER|EPlOSA…
chr01	30310240	T	TAGTATTTTAGAACGGAGGTA	884.41	1|1	0/0	0/0	0/0	0/0	0/0	0/0	0/0	0/0	0/0	0/0	0/0	0/0	0/0	0/0	0/0	0/0	0/0	0/0	0/0	./.	0/0	0/0	./.	TAGTATTTTAGAACGGAGGTA|upstream_gene_variant|MODIFIER|EPlOSAG00000028938|EPlOSAG00000028938|transcript|EPlOSAT00000030326|lincRNA||n.-1906_-1905insTACCTCCGTTCTAAAATACT|||||1906|,TAGTATTTTAGAACGGAGGTA|upstream_gene_variant|MODIFIER|OS01G0727100|OS01G0727100|transcript|OS01T0727100-01|protein_coding||c.-1456_-1455insAGTATTTTAGAACGGAGGTA|||||1205|,TAGTATTTTAGAACGGAGGTA|upstream_gene_variant|MODIFIER|…
chr01	30335711	ATATCTCATTACCTTCACAGAAAAAAAAATACTACTACACGTTTAT	A	6325.73	1|1	0/0	0/0	0/0	0/0	0/0	0/0	0/0	0/0	0/0	0/0	0/0	0/0	0/0	0/0	0/0	0/0	0/0	0/0	0/0	1|1	0/0	0/0	1|1	A|downstream_gene_variant|MODIFIER|OS01G0727600|OS01G0727600|transcript|OS01T0727600-01|protein_coding||c.*4555_*4599delATAAACGTGTAGTAGTATTTTTTTTTCTGTGAAGGTAATGAGATA|||||4303|WARNING_TRANSCRIPT_NO_START_CODON,A|downstream_gene_variant|MODIFIER|EPlOSAG00000049250|EPlOSAG00000049250|transcript|EPlOSAT00000050638|lincRNA||n.*4428_*4472delATAAACGTGTAGTAGTATTTTTTTTTCTGTGAAGGTAATGAGATA|||||4472|,A|inte…
chr01	30350527	A	AATATTGACGTTGCATTAGAATTAAAAACAT	5408.77	1/1	0/0	0/0	0/0	0/0	0/0	0/0	0/0	0/0	0/0	0/0	0/0	0/0	0/0	0/0	0/0	0/0	0/0	0/0	0/0	1/1	0/0	0/0	1/1	AATATTGACGTTGCATTAGAATTAAAAACAT|upstream_gene_variant|MODIFIER|OS01G0727800|OS01G0727800|transcript|OS01T0727800-01|protein_coding||c.-4783_-4782insATGTTTTTAATTCTAATGCAACGTCAATAT|||||4783|WARNING_TRANSCRIPT_NO_START_CODON,AATATTGACGTTGCATTAGAATTAAAAACAT|upstream_gene_variant|MODIFIER|OS01G0727840|OS01G0727840|transcript|OS01T0727840-00|protein_coding||c.-1616_-1615insATGTTTTTAATTCTAATGCAACGTCAATA…
chr01	30352400	C	CACACTGCCATGTAGACCATATTAGGTCACACACTGCCATGTAGACGCCAT	7818.77	1|1	0/0	0/0	0/0	0/0	0/0	0/0	0/0	0/0	0/0	0/0	0/0	0/0	0/0	0/0	0/0	0/0	0/0	0/0	0/0	1|1	0/0	0/0	1|1	CACACTGCCATGTAGACCATATTAGGTCACACACTGCCATGTAGACGCCAT|upstream_gene_variant|MODIFIER|OS01G0727840|OS01G0727840|transcript|OS01T0727840-00|protein_coding||c.-3489_-3488insATGGCGTCTACATGGCAGTGTGTGACCTAATATGGTCTACATGGCAGTGT|||||3384|,CACACTGCCATGTAGACCATATTAGGTCACACACTGCCATGTAGACGCCAT|upstream_gene_variant|MODIFIER|OS01G0727900|OS01G0727900|transcript|OS01T0727900-01|protein_coding||c.-277_-276insACAC…
chr01	30360167	AGAGAAGAGAAACGCGTCGCTGCAGGT	A	3571.74	1/1	0/0	0/0	0/0	0/0	0/0	0/0	0/0	0/0	0/0	0/0	0/0	0/0	0/0	0/0	0/0	0/0	0/0	0/0	0/0	1/1	0/0	0/0	1/1	A|upstream_gene_variant|MODIFIER|OS01G0728100|OS01G0728100|transcript|OS01T0728100-01|protein_coding||c.-1791_-1766delGAGAAGAGAAACGCGTCGCTGCAGGT|||||1696|,A|upstream_gene_variant|MODIFIER|OS01G0728100|OS01G0728100|transcript|OS01T0728100-02|protein_coding||c.-3212_-3187delGAGAAGAGAAACGCGTCGCTGCAGGT|||||3212|WARNING_TRANSCRIPT_NO_START_CODON,A|downstream_gene_variant|MODIFIER|OS01G0728000|OS01G072…
chr01	30384748	ATTGTTAGTGGATGATGATGTGGCATC	A	756.13	1/1	0/0	0/0	0/0	0/0	0/0	0/0	0/0	0/0	0/0	0/0	0/0	0/0	0/0	0/0	0/0	0/0	0/0	0/0	0/0	1/1	0/0	0/0	1/1	A|upstream_gene_variant|MODIFIER|OS01G0728350|OS01G0728350|transcript|OS01T0728350-00|protein_coding||c.-5245_-5220delGATGCCACATCATCATCCACTAACAA|||||918|WARNING_TRANSCRIPT_NO_START_CODON,A|downstream_gene_variant|MODIFIER|OS01G0728375|OS01G0728375|transcript|OS01T0728375-00|protein_coding||c.*5287_*5312delTTGTTAGTGGATGATGATGTGGCATC|||||915|,A|downstream_gene_variant|MODIFIER|OS01G0728400|OS01G072…
chr01	30385126	T	TCGCCGTGCTTGCCTCCTCTGCCGCACCCCGC	627.66	1/1	0/0	0/0	0/0	0/0	0/0	0/0	0/0	0/0	0/0	0/0	0/0	0/0	0/0	0/0	0/0	0/0	0/0	0/0	0/0	./.	0/0	0/0	1/1	TCGCCGTGCTTGCCTCCTCTGCCGCACCCCGC|upstream_gene_variant|MODIFIER|OS01G0728350|OS01G0728350|transcript|OS01T0728350-00|protein_coding||c.-5598_-5597insGCGGGGTGCGGCAGAGGAGGCAAGCACGGCG|||||1296|WARNING_TRANSCRIPT_NO_START_CODON,TCGCCGTGCTTGCCTCCTCTGCCGCACCCCGC|downstream_gene_variant|MODIFIER|OS01G0728375|OS01G0728375|transcript|OS01T0728375-00|protein_coding||c.*5664_*5665insCGCCGTGCTTGCCTCCTCTGCCGC…
chr01	30386548	C	CACCTCATTATTCAATCTAATAT	4266.77	1|1	0/0	0/0	0/0	0/0	0/0	0/0	0/0	0/0	0/0	0/0	0/0	0/0	0/0	0/0	0/0	0/0	0/0	0/0	0/0	1|1	0/0	0/0	1|1	CACCTCATTATTCAATCTAATAT|upstream_gene_variant|MODIFIER|OS01G0728350|OS01G0728350|transcript|OS01T0728350-00|protein_coding||c.-7020_-7019insATATTAGATTGAATAATGAGGT|||||2718|WARNING_TRANSCRIPT_NO_START_CODON,CACCTCATTATTCAATCTAATAT|downstream_gene_variant|MODIFIER|OS01G0728375|OS01G0728375|transcript|OS01T0728375-00|protein_coding||c.*7086_*7087insACCTCATTATTCAATCTAATAT|||||2715|,CACCTCATTATTCAATCT…
chr01	30396250	GCTACAAATCTGTAGTCTGCTTTCTTATATCTCTTCTCTTCTCTTTT	G	4341.73	1|1	0/0	0/0	0/0	0/0	0/0	0/0	0/0	0/0	0/0	0/0	0/0	0/0	0/0	0/0	0/0	0/0	0/0	0/0	0/0	1|1	0/0	0/0	1|1	G|3_prime_UTR_variant|MODIFIER|OS01G0728900|OS01G0728900|transcript|OS01T0728900-01|protein_coding|3/4|c.*1439_*1484delACAAATCTGTAGTCTGCTTTCTTATATCTCTTCTCTTCTCTTTTCT|||||3119|WARNING_TRANSCRIPT_NO_START_CODON&INFO_REALIGN_3_PRIME,G|upstream_gene_variant|MODIFIER|OS01G0729100|OS01G0729100|transcript|OS01T0729100-01|protein_coding||c.-2788_-2743delCTACAAATCTGTAGTCTGCTTTCTTATATCTCTTCTCTTCTCTTTT|||||…
chr01	30417668	G	GGCACGTAGTCGCTTCTCATAATTTAGCTCCCCCAA	10293.8	1|1	0/0	0/0	0/0	0/0	0/0	0/0	0/0	0/0	0/0	0/0	0/0	0/0	0/0	0/0	0/0	0/0	0/0	0/0	0/0	1|1	0/0	0/0	1|1	GGCACGTAGTCGCTTCTCATAATTTAGCTCCCCCAA|upstream_gene_variant|MODIFIER|OS01G0729500|OS01G0729500|transcript|OS01T0729500-01|protein_coding||c.-4095_-4094insTTGGGGGAGCTAAATTATGAGAAGCGACTACGTGC|||||4095|,GGCACGTAGTCGCTTCTCATAATTTAGCTCCCCCAA|upstream_gene_variant|MODIFIER|OS01G0729600|OS01G0729600|transcript|OS01T0729600-01|protein_coding||c.-1972_-1971insTTGGGGGAGCTAAATTATGAGAAGCGACTACGTGC|||||1863|,G…
chr01	30418652	C	CCTACATTGATAGTAATACACACGGGTATATATTAGCCAGCGTGCTAACTGGCGCGCTCAGTTTCGAGTAATACTTGGAGGACCTCTTTAGCATCCAAAGCGAAAAAAACTCAAGGGGG	11451.8	1/1	0/0	0/0	0/0	0/0	0/0	0/0	0/0	0/0	0/0	0/0	0/0	0/0	0/0	0/0	0/0	0/0	0/0	0/0	0/0	1/1	0/0	0/0	1/1	CCTACATTGATAGTAATACACACGGGTATATATTAGCCAGCGTGCTAACTGGCGCGCTCAGTTTCGAGTAATACTTGGAGGACCTCTTTAGCATCCAAAGCGAAAAAAACTCAAGGGGG|upstream_gene_variant|MODIFIER|OS01G0729600|OS01G0729600|transcript|OS01T0729600-01|protein_coding||c.-2956_-2955insCCCCCTTGAGTTTTTTTCGCTTTGGATGCTAAAGAGGTCCTCCAAGTATTACTCGAAACTGAGCGCGCCAGTTAGCACGCTGGCTAATATATACCCGTGTGTATTACTATCAATGTAG|||||2847|,CCTACATTGATAGTAATACACACGGGTATATATT…
chr01	30445594	T	TTAATATTCAGTGCTTGCCATTCATA	6850.77	1|1	0/0	0/0	0/0	0/0	0/0	0/0	0/0	0/0	0/0	0/0	0/0	0/0	0/0	0/0	0/0	0/0	0/0	0/0	0/0	1|1	0/0	0/0	1|1	TTAATATTCAGTGCTTGCCATTCATA|downstream_gene_variant|MODIFIER|OS01G0730100|OS01G0730100|transcript|OS01T0730100-01|protein_coding||c.*1964_*1965insTATGAATGGCAAGCACTGAATATTA|||||1832|,TTAATATTCAGTGCTTGCCATTCATA|intergenic_region|MODIFIER|OS01G0729900-OS01G0730100|OS01G0729900-OS01G0730100|intergenic_region|OS01G0729900-OS01G0730100|||n.30445594_30445595insTAATATTCAGTGCTTGCCATTCATA||||||
chr01	30445686	TGCCCCTGATAACGTTAATTTAGA	T	5148.73	1|1	0/0	0/0	0/0	0/0	0/0	0/0	0/0	0/0	0/0	0/0	0/0	0/0	0/0	0/0	0/0	0/0	0/0	0/0	0/0	1|1	0/0	0/0	1|1	T|upstream_gene_variant|MODIFIER|EPlOSAG00000050170|EPlOSAG00000050170|transcript|EPlOSAT00000051558|lincRNA||n.-5005_-4983delGCCCCTGATAACGTTAATTTAGA|||||5005|,T|downstream_gene_variant|MODIFIER|OS01G0730100|OS01G0730100|transcript|OS01T0730100-01|protein_coding||c.*1850_*1872delTCTAAATTAACGTTATCAGGGGC|||||1740|,T|downstream_gene_variant|MODIFIER|EPlOSAG00000050130|EPlOSAG00000050130|transcript|E…
chr01	30459525	ATGTGGTATCCATAACTGACACAAGCATTATCACG	A	5968.73	1|1	0/0	0/0	0/0	0/0	0/0	0/0	0/0	0/0	0/0	0/0	0/0	0/0	0/0	0/0	0/0	0/0	0/0	0/0	0/0	1|1	0/0	0/0	1|1	A|upstream_gene_variant|MODIFIER|OS01G0730200|OS01G0730200|transcript|OS01T0730200-01|protein_coding||c.-4230_-4197delCGTGATAATGCTTGTGTCAGTTATGGATACCACA|||||4196|WARNING_TRANSCRIPT_NO_START_CODON,A|upstream_gene_variant|MODIFIER|OS01G0730300|OS01G0730300|transcript|OS01T0730300-02|protein_coding||c.-623_-590delTGTGGTATCCATAACTGACACAAGCATTATCACG|||||481|,A|upstream_gene_variant|MODIFIER|OS01G07303…
chr01	30466139	ATACTGTAAGTATATACTAGCAGTT	A	5425.73	1|1	0/0	0/0	0/0	0/0	0/0	0/0	0/0	0/0	0/0	0/0	0/0	0/0	0/0	0/0	0/0	0/0	0/0	0/0	0/0	1|1	0/0	0/0	1|1	A|3_prime_UTR_variant|MODIFIER|OS01G0730400|OS01G0730400|transcript|OS01T0730400-01|protein_coding|1/1|c.*1657_*1680delAACTGCTAGTATATACTTACAGTA|||||1657|WARNING_TRANSCRIPT_NO_START_CODON,A|downstream_gene_variant|MODIFIER|OS01G0730300|OS01G0730300|transcript|OS01T0730300-02|protein_coding||c.*2080_*2103delTACTGTAAGTATATACTAGCAGTT|||||1738|,A|downstream_gene_variant|MODIFIER|OS01G0730300|OS01G0730…
chr01	30469069	AAACGACTTTTTTTTTTTATGAGTACGG	A	778.87	1|1	0/0	0/0	0/0	0/0	0/0	0/0	0/0	0/0	0/0	0/0	0/0	0/0	0/0	0/0	0/0	0/0	0/0	0/0	0/0	./.	0/0	0/0	0/0	A|upstream_gene_variant|MODIFIER|OS01G0730400|OS01G0730400|transcript|OS01T0730400-01|protein_coding||c.-983_-957delCCGTACTCATAAAAAAAAAAAGTCGTT|||||955|WARNING_TRANSCRIPT_NO_START_CODON,A|upstream_gene_variant|MODIFIER|OS01G0730500|OS01G0730500|transcript|OS01T0730500-01|protein_coding||c.-3628_-3602delAACGACTTTTTTTTTTTATGAGTACGG|||||3523|,A|downstream_gene_variant|MODIFIER|OS01G0730300|OS01G0730…
chr01	30480030	CATATATATATATATATATATATATATATATATAT	C	5174.62	1/1	0/0	0/0	0/0	0/0	0/0	0/0	0/0	./.	0/0	./.	0/0	0/0	0/0	0/0	0/0	0/0	0/0	0/0	./.	1/1	0/0	./.	1/1	C|upstream_gene_variant|MODIFIER|OS01G0730600|OS01G0730600|transcript|OS01T0730600-00|protein_coding||c.-4003_-3970delATATATATATATATATATATATATATATATATAT|||||3970|,C|upstream_gene_variant|MODIFIER|EPlOSAG00000002089|EPlOSAG00000002089|transcript|EPlOSAT00000003477|lincRNA||n.-2335_-2302delATATATATATATATATATATATATATATATATAT|||||2302|,C|upstream_gene_variant|MODIFIER|EPlOSAG00000002073|EPlOSAG000000…
chr01	30507452	CCCGTGCAATTACCTTTACAATGTTTATTTATACT	C	6321.73	1|1	0/0	0/0	0/0	0/0	0/0	0/0	0/0	0/0	0/0	0/0	0/0	0/0	0/0	0/0	0/0	0/0	0/0	0/0	0/0	1|1	0/0	0/0	1|1	C|upstream_gene_variant|MODIFIER|OS01G0731000|OS01G0731000|transcript|OS01T0731000-01|protein_coding||c.-456_-423delAGTATAAATAAACATTGTAAAGGTAATTGCACGG|||||260|,C|downstream_gene_variant|MODIFIER|EPlOSAG00000022265|EPlOSAG00000022265|transcript|EPlOSAT00000023653|lincRNA||n.*3632_*3665delCCGTGCAATTACCTTTACAATGTTTATTTATACT|||||3632|,C|downstream_gene_variant|MODIFIER|EPlOSAG00000003690|EPlOSAG00000…
chr01	30514114	A	ATCCGGATTTTTTTAATATACCC	7361.77	1/1	0/0	0/0	0/0	0/0	0/0	0/0	0/0	0/0	0/0	0/0	0/0	0/0	0/0	0/0	0/0	0/0	0/0	0/0	0/0	1/1	0/0	0/0	1/1	ATCCGGATTTTTTTAATATACCC|upstream_gene_variant|MODIFIER|EPlOSAG00000003690|EPlOSAG00000003690|transcript|EPlOSAT00000005078|lincRNA||n.-3744_-3743insGGGTATATTAAAAAAATCCGGA|||||3744|,ATCCGGATTTTTTTAATATACCC|upstream_gene_variant|MODIFIER|OS01G0731100|OS01G0731100|transcript|OS01T0731100-01|protein_coding||c.-554_-553insGGGTATATTAAAAAAATCCGGA|||||488|,ATCCGGATTTTTTTAATATACCC|downstream_gene_variant|…
chr01	30517242	G	GGTAATCAAGAGGAAGCCGGTGTCGCGGCGCGCGCTCC	7182.77	1/1	0/0	0/0	0/0	0/0	0/0	0/0	0/0	0/0	0/0	0/0	0/0	0/0	0/0	0/0	0/0	0/0	0/0	0/0	0/0	1/1	0/0	0/0	1/1	GGTAATCAAGAGGAAGCCGGTGTCGCGGCGCGCGCTCC|5_prime_UTR_variant|MODIFIER|OS01G0731201|OS01G0731201|transcript|OS01T0731201-01|protein_coding|1/1|c.-291_-290insGGAGCGCGCGCCGCGACACCGGCTTCCTCTTGATTAC|||||291|,GGTAATCAAGAGGAAGCCGGTGTCGCGGCGCGCGCTCC|upstream_gene_variant|MODIFIER|OS01G0731100|OS01G0731100|transcript|OS01T0731100-01|protein_coding||c.-3682_-3681insGGAGCGCGCGCCGCGACACCGGCTTCCTCTTGATTAC|||||3…
chr01	30521662	GTATATATATATATATATATATATATATATATA	G,GTATATATATATATATATATATATATATATATATATATATATATATATATATATATATATATATATATA	6493.5	1/1	0/0	0/0	0/0	0/0	0/0	0/0	0/0	0/0	0/0	0/0	0/0	0/0	2/2	0/0	0/0	./.	0/0	0/0	0/0	1/1	0/0	0/0	1/1	G|upstream_gene_variant|MODIFIER|OS01G0731201|OS01G0731201|transcript|OS01T0731201-01|protein_coding||c.-4742_-4711delTATATATATATATATATATATATATATATATA|||||4276|,GTATATATATATATATATATATATATATATATATATATATATATATATATATATATATATATATATATA|upstream_gene_variant|MODIFIER|OS01G0731201|OS01G0731201|transcript|OS01T0731201-01|protein_coding||c.-4743_-4742insTATATATATATATATATATATATATATATATATATA|||||4308|,G|ups…
chr01	30545344	A	ACTACTAGCGAAGCTTCGCTTGGCTGGCTGGTG	6184.77	1|1	0/0	0/0	0/0	0/0	0/0	0/0	0/0	0/0	0/0	0/0	0/0	0/0	0/0	0/0	0/0	0/0	0/0	0/0	0/0	1|1	0/0	0/0	1|1	ACTACTAGCGAAGCTTCGCTTGGCTGGCTGGTG|upstream_gene_variant|MODIFIER|EPlOSAG00000035098|EPlOSAG00000035098|transcript|EPlOSAT00000036486|lincRNA||n.-4075_-4074insCTACTAGCGAAGCTTCGCTTGGCTGGCTGGTG|||||4074|,ACTACTAGCGAAGCTTCGCTTGGCTGGCTGGTG|upstream_gene_variant|MODIFIER|EPlOSAG00000043102|EPlOSAG00000043102|transcript|EPlOSAT00000044490|lincRNA||n.-4305_-4304insCTACTAGCGAAGCTTCGCTTGGCTGGCTGGTG|||||430…
chr01	30567153	TATATATATATACATATATATACATATATATATATACATATATATATATAC	T	9208.87	./.	1/1	1|1	1/1	0/0	0/0	0/0	0/0	0/0	0/0	1/1	0/0	1/1	1/1	1/1	0/0	1/1	1/1	./.	1/1	./.	1/1	1/1	./.	T|upstream_gene_variant|MODIFIER|EPlOSAG00000006786|EPlOSAG00000006786|transcript|EPlOSAT00000008174|lincRNA||n.-3674_-3625delGTATATATATATATGTATATATATATATGTATATATATGTATATATATAT|||||3625|,T|downstream_gene_variant|MODIFIER|OS01G0732700|OS01G0732700|transcript|OS01T0732700-01|protein_coding||c.*3028_*3077delATATATATATACATATATATACATATATATATATACATATATATATATAC|||||2718|,T|downstream_gene_variant|MODIF…
chr01	30574732	TAACAGACTCTTCATCCTCCGGCTGGCCAAATGTAGCCAGTGGATTCATCCAGAGGGCCA	T	2958.73	1|1	0/0	0/0	0/0	0/0	0/0	0/0	0/0	0/0	0/0	0/0	0/0	0/0	0/0	0/0	0/0	0/0	0/0	0/0	0/0	1|1	0/0	0/0	1|1	T|splice_acceptor_variant&splice_donor_variant&splice_region_variant&intron_variant|HIGH|OS01G0733001|OS01G0733001|transcript|OS01T0733001-00|protein_coding|1/1|c.*69+1_*70-1delTGGCCCTCTGGATGAATCCACTGGCTACATTTGGCCAGCCGGAGGATGAAGAGTCTGTT||||||WARNING_TRANSCRIPT_NO_START_CODON,T|upstream_gene_variant|MODIFIER|OS01G0732801|OS01G0732801|transcript|OS01T0732801-01|protein_coding||c.-359_-301delTGGCCCT…
chr01	31360996	T	TAAGAGGATCGTTTATAATCTATTTTTATAGATAAGACCTCTTA	13956.7	0/0	1/1	1/1	0/0	0/0	0/0	0/0	0/0	0/0	0/0	0/0	0/0	0/0	1/1	0/0	0/0	1/1	0/0	0/0	1/1	1/1	1/1	1/1	0/0	TAAGAGGATCGTTTATAATCTATTTTTATAGATAAGACCTCTTA|upstream_gene_variant|MODIFIER|EPlOSAG00000028987|EPlOSAG00000028987|transcript|EPlOSAT00000030375|lincRNA||n.-4696_-4695insTAAGAGGTCTTATCTATAAAAATAGATTATAAACGATCCTCTT|||||4696|,TAAGAGGATCGTTTATAATCTATTTTTATAGATAAGACCTCTTA|upstream_gene_variant|MODIFIER|OS01G0749100|OS01G0749100|transcript|OS01T0749100-01|protein_coding||c.-1675_-1674insAAGAGGATCGTTTAT…
chr01	32130307	A	AACGCTCGGTAGTTGCATCAGGTCCC	39174.7	0/0	1/1	1/1	1/1	0/0	0/0	0/0	0/0	1/1	0/0	0/0	0/0	0/0	1/1	1/1	0/0	1/1	1/1	1/1	1/1	1/1	1/1	1/1	0/0	AACGCTCGGTAGTTGCATCAGGTCCC|upstream_gene_variant|MODIFIER|OS01G0763300|OS01G0763300|transcript|OS01T0763300-01|protein_coding||c.-2390_-2389insGGGACCTGATGCAACTACCGAGCGT|||||2325|,AACGCTCGGTAGTTGCATCAGGTCCC|upstream_gene_variant|MODIFIER|OS01G0763600|OS01G0763600|transcript|OS01T0763600-01|protein_coding||c.-482_-481insACGCTCGGTAGTTGCATCAGGTCCC|||||295|,AACGCTCGGTAGTTGCATCAGGTCCC|upstream_gene_var…
chr01	32324397	T	TGAAATGCCAAGCTTTTGACAGGAAAGGCAAAATAATTAATAAATGTAGAAATATATGTAATGTAGAATAATTCAGGAAAG	35177.5	0/0	1/1	1/1	1/1	0/0	0/0	0/0	0/0	1/1	0/0	0/0	0/0	0/0	1/1	1/1	0/0	1/1	1/1	1/1	1/1	./.	1/1	1/1	0/0	TGAAATGCCAAGCTTTTGACAGGAAAGGCAAAATAATTAATAAATGTAGAAATATATGTAATGTAGAATAATTCAGGAAAG|upstream_gene_variant|MODIFIER|OS01G0766900|OS01G0766900|transcript|OS01T0766900-01|protein_coding||c.-4874_-4873insCTTTCCTGAATTATTCTACATTACATATATTTCTACATTTATTAATTATTTTGCCTTTCCTGTCAAAAGCTTGGCATTTC|||||4871|,TGAAATGCCAAGCTTTTGACAGGAAAGGCAAAATAATTAATAAATGTAGAAATATATGTAATGTAGAATAATTCAGGAAAG|downstream_gene_variant|MODI…
chr01	32341534	G	GAGCTCTACCACCGCCTCGGATCCAGCTCGCC	24268.4	0/0	1/1	1/1	1|1	0/0	0/0	0/0	0/0	1|1	0/0	0/0	0/0	0/0	1/1	1|1	0/0	1/1	1|1	./.	1/1	1|1	1/1	1/1	0/0	GAGCTCTACCACCGCCTCGGATCCAGCTCGCC|upstream_gene_variant|MODIFIER|OS01G0767100|OS01G0767100|transcript|OS01T0767100-01|protein_coding||c.-3561_-3560insGGCGAGCTGGATCCGAGGCGGTGGTAGAGCT|||||3482|,GAGCTCTACCACCGCCTCGGATCCAGCTCGCC|upstream_gene_variant|MODIFIER|EPlOSAG00000043746|EPlOSAG00000043746|transcript|EPlOSAT00000045134|lincRNA||n.-1889_-1888insGGCGAGCTGGATCCGAGGCGGTGGTAGAGCT|||||1889|,GAGCTCTAC…
chr01	32360634	AAAGTTGGGTTTCACAACTTCTGG	A	30988.6	0/0	1|1	1|1	1|1	0/0	0/0	0/0	0/0	1|1	0/0	0/0	0/0	0/0	1|1	1|1	0/0	1|1	1|1	1|1	1|1	1|1	1|1	1/1	0/0	A|downstream_gene_variant|MODIFIER|OS01G0767700|OS01G0767700|transcript|OS01T0767700-01|protein_coding||c.*693_*715delAAGTTGGGTTTCACAACTTCTGG|||||71|,A|downstream_gene_variant|MODIFIER|OS01G0767700|OS01G0767700|transcript|OS01T0767700-02|protein_coding||c.*6081_*6103delAAGTTGGGTTTCACAACTTCTGG|||||99|,A|downstream_gene_variant|MODIFIER|OS01G0767700|OS01G0767700|transcript|OS01T0767700-03|protein_c…
chr01	32362158	TGAAATGTGAGAGTGAAGCATTTTGTATC	T	14909.5	0/0	1/1	1/1	1/1	0/0	0/0	0/0	0/0	1/1	0/0	0/0	0/0	0/0	1/1	1/1	0/0	1/1	1/1	1/1	1/1	1/1	1/1	1/1	0/0	T|downstream_gene_variant|MODIFIER|OS01G0767700|OS01G0767700|transcript|OS01T0767700-01|protein_coding||c.*2217_*2244delGAAATGTGAGAGTGAAGCATTTTGTATC|||||1595|,T|downstream_gene_variant|MODIFIER|OS01G0767700|OS01G0767700|transcript|OS01T0767700-02|protein_coding||c.*7605_*7632delGAAATGTGAGAGTGAAGCATTTTGTATC|||||1623|,T|downstream_gene_variant|MODIFIER|OS01G0767700|OS01G0767700|transcript|OS01T0767…
chr01	32576298	CTTTTGTTTTAAGGCTGTCCTCGGTAGGGAG	C	33493.7	0/0	1/1	1/1	1/1	0/0	0/0	0/0	0/0	1/1	0/0	0/0	0/0	0/0	1/1	1/1	0/0	1/1	1/1	1/1	0/0	1/1	1/1	1/1	0/0	C|upstream_gene_variant|MODIFIER|EPlOSAG00000049107|EPlOSAG00000049107|transcript|EPlOSAT00000050495|lincRNA||n.-3672_-3643delCTCCCTACCGAGGACAGCCTTAAAACAAAA|||||3643|,C|upstream_gene_variant|MODIFIER|EPlOSAG00000009510|EPlOSAG00000009510|transcript|EPlOSAT00000010898|lincRNA||n.-1520_-1491delCTCCCTACCGAGGACAGCCTTAAAACAAAA|||||1491|,C|upstream_gene_variant|MODIFIER|OS01G0771950|OS01G0771950|transc…
chr01	32603529	G	GAGGCGAGGCGAGGCGGCGGCAGAGGCAGCGAGCGCGGA	22303	0/0	1|1	1|1	0/0	0/0	0/0	0/0	0/0	1|1	0/0	0/0	0/0	0/0	1|1	1|1	0/0	1/1	1|1	0/0	0/0	1|1	1|1	1|1	0/0	GAGGCGAGGCGAGGCGGCGGCAGAGGCAGCGAGCGCGGA|upstream_gene_variant|MODIFIER|OS01G0772200|OS01G0772200|transcript|OS01T0772200-02|protein_coding||c.-1852_-1851insTCCGCGCTCGCTGCCTCTGCCGCCGCCTCGCCTCGCCT|||||1726|,GAGGCGAGGCGAGGCGGCGGCAGAGGCAGCGAGCGCGGA|upstream_gene_variant|MODIFIER|OS01G0772400|OS01G0772400|transcript|OS01T0772400-00|protein_coding||c.-5152_-5151insAGGCGAGGCGAGGCGGCGGCAGAGGCAGCGAGCGCGGA…
chr01	32928596	A	ATATATATATATATATATATGAGTGTCC	1993.65	./.	./.	./.	./.	0/0	0/0	0/0	0/0	./.	0/0	./.	0/0	0/0	0/0	0/0	./.	1/1	./.	./.	./.	./.	0/0	0/0	./.	ATATATATATATATATATATGAGTGTCC|upstream_gene_variant|MODIFIER|OS01G0777700|OS01G0777700|transcript|OS01T0777700-00|protein_coding||c.-3263_-3262insGGACACTCATATATATATATATATATA|||||3234|,ATATATATATATATATATATGAGTGTCC|upstream_gene_variant|MODIFIER|EPlOSAG00000012826|EPlOSAG00000012826|transcript|EPlOSAT00000014214|lincRNA||n.-955_-954insTATATATATATATATATATGAGTGTCC|||||954|,ATATATATATATATATATATGAGTGTCC…
chr01	32996335	A	ACGGTTTTCGATAAATTTCAAT	8531.83	0/0	0/0	0/0	0/0	0/0	0/0	0/0	0/0	0/0	0/0	0/0	0/0	0/0	0/0	1/1	0/0	1/1	0/0	0/0	0/0	0/0	0/0	0/0	0/0	ACGGTTTTCGATAAATTTCAAT|upstream_gene_variant|MODIFIER|OS01G0779201|OS01G0779201|transcript|OS01T0779201-00|protein_coding||c.-1415_-1414insATTGAAATTTATCGAAAACCG|||||1415|,ACGGTTTTCGATAAATTTCAAT|upstream_gene_variant|MODIFIER|OS01G0779300|OS01G0779300|transcript|OS01T0779300-01|protein_coding||c.-513_-512insCGGTTTTCGATAAATTTCAAT|||||426|,ACGGTTTTCGATAAATTTCAAT|downstream_gene_variant|MODIFIER|OS01…
chr01	33013889	C	CATACTATAACACTGATAGAT	446.74	0/0	0/0	0/0	0/0	0/0	0/0	0/0	0/0	0/0	0/0	0/0	0/0	0/0	0/0	./.	0/0	1/1	0/0	0/0	0/0	0/0	0/0	0/0	0/0	CATACTATAACACTGATAGAT|upstream_gene_variant|MODIFIER|OS01G0779400|OS01G0779400|transcript|OS01T0779400-02|protein_coding||c.-3870_-3869insATCTATCAGTGTTATAGTAT|||||3673|,CATACTATAACACTGATAGAT|upstream_gene_variant|MODIFIER|EPlOSAG00000051400|EPlOSAG00000051400|transcript|EPlOSAT00000052788|lincRNA||n.-2244_-2243insATCTATCAGTGTTATAGTAT|||||2244|,CATACTATAACACTGATAGAT|upstream_gene_variant|MODIFIER|…
chr01	33013892	A	ACTATAACACTGATAGATATAT	1065.74	0/0	0/0	0/0	0/0	0/0	0/0	0/0	0/0	0/0	0/0	0/0	0/0	0/0	0/0	1/1	0/0	./.	0/0	0/0	0/0	0/0	0/0	0/0	0/0	ACTATAACACTGATAGATATAT|upstream_gene_variant|MODIFIER|OS01G0779400|OS01G0779400|transcript|OS01T0779400-02|protein_coding||c.-3873_-3872insATATATCTATCAGTGTTATAG|||||3676|,ACTATAACACTGATAGATATAT|upstream_gene_variant|MODIFIER|EPlOSAG00000051400|EPlOSAG00000051400|transcript|EPlOSAT00000052788|lincRNA||n.-2247_-2246insATATATCTATCAGTGTTATAG|||||2247|,ACTATAACACTGATAGATATAT|upstream_gene_variant|MODI…
chr01	33031431	A	ACTAGTGAATACTAGTACTTACTAAATAAG	8145.83	0/0	0/0	0/0	0/0	0/0	0/0	0/0	0/0	0/0	0/0	0/0	0/0	0/0	0/0	1|1	0/0	1|1	0/0	0/0	0/0	0/0	0/0	0/0	0/0	ACTAGTGAATACTAGTACTTACTAAATAAG|upstream_gene_variant|MODIFIER|OS01G0779800|OS01G0779800|transcript|OS01T0779800-01|protein_coding||c.-1145_-1144insCTTATTTAGTAAGTACTAGTATTCACTAG|||||943|,ACTAGTGAATACTAGTACTTACTAAATAAG|upstream_gene_variant|MODIFIER|EPlOSAG00000006355|EPlOSAG00000006355|transcript|EPlOSAT00000007743|lincRNA||n.-980_-979insCTAGTGAATACTAGTACTTACTAAATAAG|||||979|,ACTAGTGAATACTAGTACTTA…
chr01	33035995	TCCGCTTGCGAAGATAGTAAAAAAGAGCTTCGCAGGCGGACCGC	T	2980.79	0/0	0/0	0/0	0/0	0/0	0/0	0/0	0/0	0/0	0/0	0/0	0/0	0/0	0/0	1|1	0/0	1|1	0/0	0/0	0/0	0/0	0/0	0/0	0/0	T|gene_fusion|HIGH|EPlOSAG00000025699&EPlOSAG00000048015|EPlOSAG00000025699&EPlOSAG00000048015|gene_variant|EPlOSAG00000025699|||n.33035996_33036038delCCGCTTGCGAAGATAGTAAAAAAGAGCTTCGCAGGCGGACCGC||||||,T|gene_fusion|HIGH|EPlOSAG00000047502&EPlOSAG00000048015|EPlOSAG00000047502&EPlOSAG00000048015|gene_variant|EPlOSAG00000047502|||n.33035996_33036038delCCGCTTGCGAAGATAGTAAAAAAGAGCTTCGCAGGCGGACCGC||||…
chr01	33036569	C	CGCCGCCGGCCCCTCCACCGCGCGCACGGCT	1140.23	0/0	0/0	0/0	0/0	./.	0/0	0/0	0/0	0/0	./.	0/0	0/0	0/0	0/0	0/0	0/0	1|1	0/0	0/0	0/0	0/0	0/0	0/0	0/0	CGCCGCCGGCCCCTCCACCGCGCGCACGGCT|upstream_gene_variant|MODIFIER|EPlOSAG00000006122|EPlOSAG00000006122|transcript|EPlOSAT00000007510|lincRNA||n.-4126_-4125insAGCCGTGCGCGCGGTGGAGGGGCCGGCGGC|||||4126|,CGCCGCCGGCCCCTCCACCGCGCGCACGGCT|upstream_gene_variant|MODIFIER|EPlOSAG00000016385|EPlOSAG00000016385|transcript|EPlOSAT00000017773|lincRNA||n.-1149_-1148insAGCCGTGCGCGCGGTGGAGGGGCCGGCGGC|||||1149|,CGCCG…
chr01	33046014	GACACTACCAATTTTCCGCAAAATTTTTTAATGATTAGTACATTTATTATTATTAGATGATAAAACATGAATAATATTTTATA	G	2512.79	0/0	0/0	0/0	0/0	0/0	0/0	0/0	0/0	0/0	0/0	0/0	0/0	0/0	0/0	1|1	0/0	1|1	0/0	0/0	0/0	0/0	0/0	0/0	0/0	G|upstream_gene_variant|MODIFIER|EPlOSAG00000041354|EPlOSAG00000041354|transcript|EPlOSAT00000042742|lincRNA||n.-3863_-3782delTATAAAATATTATTCATGTTTTATCATCTAATAATAATAAATGTACTAATCATTAAAAAATTTTGCGGAAAATTGGTAGTGT|||||3782|,G|upstream_gene_variant|MODIFIER|EPlOSAG00000049502|EPlOSAG00000049502|transcript|EPlOSAT00000050890|lincRNA||n.-4780_-4699delACACTACCAATTTTCCGCAAAATTTTTTAATGATTAGTACATTTATTATTATTA…
chr01	33046163	T	TGAATTTTCACGGCTGCACTTATTTTGG	4939.83	0/0	0/0	0/0	0/0	0/0	0/0	0/0	0/0	0/0	0/0	0/0	0/0	0/0	0/0	1/1	0/0	1/1	0/0	0/0	0/0	0/0	0/0	0/0	0/0	TGAATTTTCACGGCTGCACTTATTTTGG|upstream_gene_variant|MODIFIER|EPlOSAG00000041354|EPlOSAG00000041354|transcript|EPlOSAT00000042742|lincRNA||n.-3931_-3930insCCAAAATAAGTGCAGCCGTGAAAATTC|||||3931|,TGAATTTTCACGGCTGCACTTATTTTGG|upstream_gene_variant|MODIFIER|EPlOSAG00000049502|EPlOSAG00000049502|transcript|EPlOSAT00000050890|lincRNA||n.-4632_-4631insGAATTTTCACGGCTGCACTTATTTTGG|||||4631|,TGAATTTTCACGGCTGC…
chr01	33050082	TTAGATGGGACTAAAACTTTTAAG	T	4725.79	0/0	0/0	0/0	0/0	0/0	0/0	0/0	0/0	0/0	0/0	0/0	0/0	0/0	0/0	1|1	0/0	1|1	0/0	0/0	0/0	0/0	0/0	0/0	0/0	T|upstream_gene_variant|MODIFIER|EPlOSAG00000049502|EPlOSAG00000049502|transcript|EPlOSAT00000050890|lincRNA||n.-712_-690delTAGATGGGACTAAAACTTTTAAG|||||712|,T|upstream_gene_variant|MODIFIER|OS01G0780400|OS01G0780400|transcript|OS01T0780400-02|protein_coding||c.-942_-920delTAGATGGGACTAAAACTTTTAAG|||||765|,T|upstream_gene_variant|MODIFIER|OS01G0780400|OS01G0780400|transcript|OS01T0780400-01|protein…
chr01	33066344	G	GCCGCCCCCGCCCCCGCCCCCGCCC	3055.56	0/0	0/0	0/0	0/0	0/0	0/0	0/0	0/0	0/0	0/0	0/0	0/0	0/0	0/0	1/1	0/0	1/1	0/0	0/0	0/0	0/0	0/0	0/0	0/0	GCCGCCCCCGCCCCCGCCCCCGCCC|disruptive_inframe_insertion|MODERATE|OS01G0780600|OS01G0780600|transcript|OS01T0780600-01|protein_coding|3/4|c.671_672insGGGCGGGGGCGGGGGCGGGGGCGG|p.Gly224_Ala225insGlyGlyGlyGlyGlyGlyGlyGly|787/2306|671/1980|224/659||,GCCGCCCCCGCCCCCGCCCCCGCCC|disruptive_inframe_insertion|MODERATE|OS01G0780701|OS01G0780701|transcript|OS01T0780701-00|protein_coding|2/2|c.439_440insCGCCCCC…
chr01	33068685	CATTAAACATTCTATAAATGTTTCTAAACCGTTATA	C	7257.79	0/0	0/0	0/0	0/0	0/0	0/0	0/0	0/0	0/0	0/0	0/0	0/0	0/0	0/0	1/1	0/0	1/1	0/0	0/0	0/0	0/0	0/0	0/0	0/0	C|upstream_gene_variant|MODIFIER|OS01G0780600|OS01G0780600|transcript|OS01T0780600-01|protein_coding||c.-1002_-968delTATAACGGTTTAGAAACATTTATAGAATGTTTAAT|||||852|,C|downstream_gene_variant|MODIFIER|SCAMP2|OS01G0780500|transcript|OS01T0780500-01|protein_coding||c.*4314_*4348delATTAAACATTCTATAAATGTTTCTAAACCGTTATA|||||3977|,C|downstream_gene_variant|MODIFIER|OS01G0780701|OS01G0780701|transcript|OS01T…
chr01	33069906	C	CTGAGCAAAATTTATCTAAAATTTTTT	8121.83	0/0	0/0	0/0	0/0	0/0	0/0	0/0	0/0	0/0	0/0	0/0	0/0	0/0	0/0	1/1	0/0	1/1	0/0	0/0	0/0	0/0	0/0	0/0	0/0	CTGAGCAAAATTTATCTAAAATTTTTT|upstream_gene_variant|MODIFIER|OS01G0780600|OS01G0780600|transcript|OS01T0780600-01|protein_coding||c.-2189_-2188insAAAAAATTTTAGATAAATTTTGCTCA|||||2073|,CTGAGCAAAATTTATCTAAAATTTTTT|downstream_gene_variant|MODIFIER|OS01G0780701|OS01G0780701|transcript|OS01T0780701-00|protein_coding||c.*3505_*3506insTGAGCAAAATTTATCTAAAATTTTTT|||||3133|,CTGAGCAAAATTTATCTAAAATTTTTT|downstr…
chr01	33073006	T	TACCTTCTCGAAATCGCCGGTCACCCCTC	4700.83	0/0	0/0	0/0	0/0	0/0	0/0	0/0	0/0	0/0	0/0	0/0	0/0	0/0	0/0	1/1	0/0	1/1	0/0	0/0	0/0	0/0	0/0	0/0	0/0	TACCTTCTCGAAATCGCCGGTCACCCCTC|downstream_gene_variant|MODIFIER|OS01G0780800|OS01G0780800|transcript|OS01T0780800-01|protein_coding||c.*841_*842insGAGGGGTGACCGGCGATTTCGAGAAGGT|||||576|,TACCTTCTCGAAATCGCCGGTCACCCCTC|downstream_gene_variant|MODIFIER|OS01G0780800|OS01G0780800|transcript|OS01T0780800-02|protein_coding||c.*4846_*4847insGAGGGGTGACCGGCGATTTCGAGAAGGT|||||4468|,TACCTTCTCGAAATCGCCGGTCACCCCT…
chr01	33085942	C	CTAATGCTTGCCATCGGTTATCCAACTCGT	4470.75	0/0	1|1	1|1	./.	0/0	0/0	0/0	0/0	./.	0/0	0/0	0/0	0/0	./.	1|1	0/0	0/0	0/0	./.	0/0	./.	./.	./.	0/0	CTAATGCTTGCCATCGGTTATCCAACTCGT|upstream_gene_variant|MODIFIER|EPlOSAG00000034885|EPlOSAG00000034885|transcript|EPlOSAT00000036273|lincRNA||n.-1311_-1310insACGAGTTGGATAACCGATGGCAAGCATTA|||||1311|,CTAATGCTTGCCATCGGTTATCCAACTCGT|upstream_gene_variant|MODIFIER|OS01G0781000|OS01G0781000|transcript|OS01T0781000-01|protein_coding||c.-3445_-3444insTAATGCTTGCCATCGGTTATCCAACTCGT|||||3267|,CTAATGCTTGCCATCGG…
chr01	33085944	A	AATGCTTGCCATCGGTTATCCAACTCGTT	1125.61	0/0	./.	0/0	1|1	0/0	0/0	0/0	0/0	./.	0/0	0/0	0/0	0/0	./.	./.	0/0	0/0	0/0	./.	0/0	./.	./.	./.	0/0	AATGCTTGCCATCGGTTATCCAACTCGTT|upstream_gene_variant|MODIFIER|EPlOSAG00000034885|EPlOSAG00000034885|transcript|EPlOSAT00000036273|lincRNA||n.-1313_-1312insAACGAGTTGGATAACCGATGGCAAGCAT|||||1313|,AATGCTTGCCATCGGTTATCCAACTCGTT|upstream_gene_variant|MODIFIER|OS01G0781000|OS01G0781000|transcript|OS01T0781000-01|protein_coding||c.-3443_-3442insATGCTTGCCATCGGTTATCCAACTCGTT|||||3265|,AATGCTTGCCATCGGTTATCC…
chr01	33088956	A	ATCTAAATTGGTTGGATGGGACATATCT	429.79	0/0	./.	./.	./.	0/0	0/0	0/0	0/0	./.	0/0	0/0	0/0	0/0	./.	./.	0/0	./.	0/0	./.	0/0	./.	1|1	./.	0/0	ATCTAAATTGGTTGGATGGGACATATCT|upstream_gene_variant|MODIFIER|EPlOSAG00000034885|EPlOSAG00000034885|transcript|EPlOSAT00000036273|lincRNA||n.-4325_-4324insAGATATGTCCCATCCAACCAATTTAGA|||||4325|,ATCTAAATTGGTTGGATGGGACATATCT|upstream_gene_variant|MODIFIER|OS01G0781000|OS01G0781000|transcript|OS01T0781000-01|protein_coding||c.-431_-430insTCTAAATTGGTTGGATGGGACATATCT|||||253|,ATCTAAATTGGTTGGATGGGACATATCT…
chr01	33088969	C	CTATATTTTGAGATGGAGGGAATATTAATAT	1001.86	0/0	./.	./.	./.	0/0	0/0	0/0	0/0	./.	0/0	0/0	0/0	0/0	./.	./.	0/0	./.	0/0	./.	0/0	./.	1|1	./.	0/0	CTATATTTTGAGATGGAGGGAATATTAATAT|upstream_gene_variant|MODIFIER|EPlOSAG00000034885|EPlOSAG00000034885|transcript|EPlOSAT00000036273|lincRNA||n.-4338_-4337insATATTAATATTCCCTCCATCTCAAAATATA|||||4338|,CTATATTTTGAGATGGAGGGAATATTAATAT|upstream_gene_variant|MODIFIER|OS01G0781000|OS01G0781000|transcript|OS01T0781000-01|protein_coding||c.-418_-417insTATATTTTGAGATGGAGGGAATATTAATAT|||||240|,CTATATTTTGAGATGG…
chr01	33093306	GGCAACTTAAGCGAGACTAGAAAA	G	638.59	0/0	0/0	0/0	0/0	0/0	0/0	0/0	0/0	0/0	0/0	0/0	0/0	0/0	0/0	1|1	0/0	1|1	0/0	0/0	0/0	0/0	0/0	0/0	0/0	G|frameshift_variant|HIGH|OS01G0781100|OS01G0781100|transcript|OS01T0781100-01|protein_coding|2/2|c.1165_1187delAACTTAAGCGAGACTAGAAAAGC|p.Asn389fs|1457/4509|1165/3822|389/1273||INFO_REALIGN_3_PRIME,G|upstream_gene_variant|MODIFIER|OS01G0781200|OS01G0781200|transcript|OS01T0781200-01|protein_coding||c.-6570_-6548delGCAACTTAAGCGAGACTAGAAAA|||||4775|,G|downstream_gene_variant|MODIFIER|OS01G0781000|O…
chr01	33147292	A	AACTGCATCTCCACTTCATATTT	597.74	0/0	0/0	0/0	0/0	0/0	0/0	0/0	0/0	0/0	0/0	0/0	0/0	0/0	0/0	./.	0/0	1|1	0/0	0/0	0/0	0/0	0/0	0/0	0/0	AACTGCATCTCCACTTCATATTT|upstream_gene_variant|MODIFIER|OS01G0782300|OS01G0782300|transcript|OS01T0782300-01|protein_coding||c.-913_-912insACTGCATCTCCACTTCATATTT|||||308|WARNING_TRANSCRIPT_NO_START_CODON,AACTGCATCTCCACTTCATATTT|downstream_gene_variant|MODIFIER|OS01G0782100|OS01G0782100|transcript|OS01T0782100-00|protein_coding||c.*2293_*2294insACTGCATCTCCACTTCATATTT|||||2294|,AACTGCATCTCCACTTCATAT…
chr01	33153316	T	TCGGTCGAAGTAACTGGCGACCAAATATCATTAAGATTTGA	13697	0/0	1/1	1/1	1/1	0/0	0/0	0/0	0/0	1/1	0/0	0/0	0/0	0/0	1/1	0/0	0/0	0/0	0/0	0/0	0/0	1/1	1/1	1/1	0/0	TCGGTCGAAGTAACTGGCGACCAAATATCATTAAGATTTGA|upstream_gene_variant|MODIFIER|OS01G0782200|OS01G0782200|transcript|OS01T0782200-02|protein_coding||c.-886_-885insTCAAATCTTAATGATATTTGGTCGCCAGTTACTTCGACCG|||||826|,TCGGTCGAAGTAACTGGCGACCAAATATCATTAAGATTTGA|upstream_gene_variant|MODIFIER|EPlOSAG00000001699|EPlOSAG00000001699|transcript|EPlOSAT00000003087|lincRNA||n.-93_-92insTCAAATCTTAATGATATTTGGTCGCCAGTTA…
chr01	33164497	G	GGAGGAATCACCTCTCTTTTTTTTCAGGGAATTACACAGTACAACGCAGAAAA	7790.83	0/0	0/0	0/0	0/0	0/0	0/0	0/0	0/0	0/0	0/0	0/0	0/0	0/0	0/0	1/1	0/0	1/1	0/0	0/0	0/0	0/0	0/0	0/0	0/0	GGAGGAATCACCTCTCTTTTTTTTCAGGGAATTACACAGTACAACGCAGAAAA|upstream_gene_variant|MODIFIER|EPlOSAG00000038849|EPlOSAG00000038849|transcript|EPlOSAT00000040237|lincRNA||n.-2874_-2873insGAGGAATCACCTCTCTTTTTTTTCAGGGAATTACACAGTACAACGCAGAAAA|||||2873|,GGAGGAATCACCTCTCTTTTTTTTCAGGGAATTACACAGTACAACGCAGAAAA|upstream_gene_variant|MODIFIER|OS01G0782850|OS01G0782850|transcript|OS01T0782850-00|protein_coding||c.-4…
chr01	33189020	G	GCCAATCACAATCTTCCACCATTCAATTTCCTCACATACCTCCATTTCTCAA	5870.83	0/0	0/0	0/0	0/0	0/0	0/0	0/0	0/0	0/0	0/0	0/0	0/0	0/0	0/0	1/1	0/0	1/1	0/0	0/0	0/0	0/0	0/0	0/0	0/0	GCCAATCACAATCTTCCACCATTCAATTTCCTCACATACCTCCATTTCTCAA|upstream_gene_variant|MODIFIER|EPlOSAG00000038976|EPlOSAG00000038976|transcript|EPlOSAT00000040364|lincRNA||n.-2091_-2090insTTGAGAAATGGAGGTATGTGAGGAAATTGAATGGTGGAAGATTGTGATTGG|||||2091|,GCCAATCACAATCTTCCACCATTCAATTTCCTCACATACCTCCATTTCTCAA|downstream_gene_variant|MODIFIER|OS01G0783100|OS01G0783100|transcript|OS01T0783100-01|protein_coding||c.*42…
chr01	33195025	C	CTTAGTAATCTTTACAGGTGCGAACATAACT,CTTAGTAATCTTTACAGGTGCGAACATAACTT	1361.64	0/0	0/0	0/0	0/0	0/0	0/0	0/0	0/0	0/0	0/0	0/0	0/0	0/0	0/0	2/2	0/0	1/1	0/0	0/0	0/0	0/0	0/0	0/0	0/0	CTTAGTAATCTTTACAGGTGCGAACATAACT|upstream_gene_variant|MODIFIER|OS01G0783200|OS01G0783200|transcript|OS01T0783200-01|protein_coding||c.-3810_-3809insAGTTATGTTCGCACCTGTAAAGATTACTAA|||||2047|,CTTAGTAATCTTTACAGGTGCGAACATAACTT|upstream_gene_variant|MODIFIER|OS01G0783200|OS01G0783200|transcript|OS01T0783200-01|protein_coding||c.-3810_-3809insAAGTTATGTTCGCACCTGTAAAGATTACTAA|||||2047|,CTTAGTAATCTTTACAGGT…
chr01	33209240	C	CACACAGATATTTTTTTTCTTAACCG	1016.82	0/0	0/0	0/0	0/0	0/0	0/0	0/0	0/0	0/0	0/0	0/0	0/0	0/0	0/0	1|1	0/0	1|1	0/0	0/0	0/0	0/0	0/0	0/0	0/0	CACACAGATATTTTTTTTCTTAACCG|upstream_gene_variant|MODIFIER|OS01G0783700|OS01G0783700|transcript|OS01T0783700-01|protein_coding||c.-1069_-1068insCGGTTAAGAAAAAAAATATCTGTGT|||||979|,CACACAGATATTTTTTTTCTTAACCG|upstream_gene_variant|MODIFIER|EPlOSAG00000039097|EPlOSAG00000039097|transcript|EPlOSAT00000040485|lincRNA||n.-188_-187insACACAGATATTTTTTTTCTTAACCG|||||187|,CACACAGATATTTTTTTTCTTAACCG|upstream_g…
chr01	33215294	T	TACACACACACACACACACACACACACCAC	3779.83	0/0	0/0	0/0	0/0	0/0	0/0	0/0	0/0	0/0	0/0	0/0	0/0	0/0	0/0	1|1	0/0	1|1	0/0	0/0	0/0	0/0	0/0	0/0	0/0	TACACACACACACACACACACACACACCAC|3_prime_UTR_variant|MODIFIER|OS01G0783851|OS01G0783851|transcript|OS01T0783851-00|protein_coding|1/1|c.*256_*257insGTGGTGTGTGTGTGTGTGTGTGTGTGTGT|||||256|,TACACACACACACACACACACACACACCAC|intron_variant|MODIFIER|OS01G0783800|OS01G0783800|transcript|OS01T0783800-01|protein_coding|6/8|c.1796-47_1796-46insACACACACACACACACACACACACACCAC||||||
chr01	33221011	T	TAATTGAAGGTATTGCTCAAGGTC,TAATTGAAGGTATTGC	1007.04	0/0	0/0	0/0	0/0	0/0	0/0	0/0	0/0	0/0	0/0	0/0	0/0	0/0	0/0	1/1	0/0	2/2	0/0	0/0	0/0	0/0	0/0	0/0	0/0	TAATTGAAGGTATTGC|upstream_gene_variant|MODIFIER|OS01G0783851|OS01G0783851|transcript|OS01T0783851-00|protein_coding||c.-5183_-5182insGCAATACCTTCAATT|||||4972|,TAATTGAAGGTATTGCTCAAGGTC|upstream_gene_variant|MODIFIER|OS01G0783851|OS01G0783851|transcript|OS01T0783851-00|protein_coding||c.-5183_-5182insGACCTTGAGCAATACCTTCAATT|||||4972|,TAATTGAAGGTATTGC|upstream_gene_variant|MODIFIER|EPlOSAG0000001743…
chr01	33223156	T	TCCCCACGAGTGGAGTGCAGTGA	6639.83	0/0	0/0	0/0	0/0	0/0	0/0	0/0	0/0	0/0	0/0	0/0	0/0	0/0	0/0	1|1	0/0	1|1	0/0	0/0	0/0	0/0	0/0	0/0	0/0	TCCCCACGAGTGGAGTGCAGTGA|upstream_gene_variant|MODIFIER|OS01G0784000|OS01G0784000|transcript|OS01T0784000-01|protein_coding||c.-1593_-1592insTCACTGCACTCCACTCGTGGGG|||||1592|WARNING_TRANSCRIPT_NO_START_CODON,TCCCCACGAGTGGAGTGCAGTGA|upstream_gene_variant|MODIFIER|EPlOSAG00000017439|EPlOSAG00000017439|transcript|EPlOSAT00000018827|lincRNA||n.-1447_-1446insCCCCACGAGTGGAGTGCAGTGA|||||1446|,TCCCCACGAGTG…
chr01	33225028	G	GGGTCTCGCATGCGCTCGCGGCTGCAGCCACCGGCGGCCGGTTTGGTAGATAGCTTGAATCCCATAGAATAGTTCGA	2395.74	0/0	0/0	0/0	0/0	0/0	0/0	0/0	0/0	0/0	0/0	0/0	0/0	0/0	0/0	1/1	0/0	./.	0/0	0/0	0/0	0/0	0/0	0/0	0/0	GGGTCTCGCATGCGCTCGCGGCTGCAGCCACCGGCGGCCGGTTTGGTAGATAGCTTGAATCCCATAGAATAGTTCGA|upstream_gene_variant|MODIFIER|OS01G0784000|OS01G0784000|transcript|OS01T0784000-01|protein_coding||c.-3465_-3464insTCGAACTATTCTATGGGATTCAAGCTATCTACCAAACCGGCCGCCGGTGGCTGCAGCCGCGAGCGCATGCGAGACC|||||3464|WARNING_TRANSCRIPT_NO_START_CODON,GGGTCTCGCATGCGCTCGCGGCTGCAGCCACCGGCGGCCGGTTTGGTAGATAGCTTGAATCCCATAGAATAGTTCGA|upstrea…
chr01	33226593	G	GCGGCTGCAGCCACCGGCGGCCGGTTTGGTAGATAGCTTGAATC	764.74	0/0	0/0	0/0	0/0	0/0	0/0	0/0	0/0	0/0	0/0	0/0	0/0	0/0	0/0	./.	0/0	1/1	0/0	0/0	0/0	0/0	0/0	0/0	0/0	GCGGCTGCAGCCACCGGCGGCCGGTTTGGTAGATAGCTTGAATC|upstream_gene_variant|MODIFIER|EPlOSAG00000047305|EPlOSAG00000047305|transcript|EPlOSAT00000048693|lincRNA||n.-562_-561insCGGCTGCAGCCACCGGCGGCCGGTTTGGTAGATAGCTTGAATC|||||561|,GCGGCTGCAGCCACCGGCGGCCGGTTTGGTAGATAGCTTGAATC|upstream_gene_variant|MODIFIER|OS01G0784200|OS01G0784200|transcript|OS01T0784200-00|protein_coding||c.-1059_-1058insCGGCTGCAGCCACCGGCG…
chr01	33230307	AGCACCCTGCCTCGAGCGTGAAACGGGATCAACG	A	5972.79	0/0	0/0	0/0	0/0	0/0	0/0	0/0	0/0	0/0	0/0	0/0	0/0	0/0	0/0	1|1	0/0	1|1	0/0	0/0	0/0	0/0	0/0	0/0	0/0	A|disruptive_inframe_deletion|MODERATE|OS01G0784200|OS01G0784200|transcript|OS01T0784200-00|protein_coding|2/6|c.1508_1540delACCCTGCCTCGAGCGTGAAACGGGATCAACGGC|p.His503_Arg513del|1508/2631|1508/2571|503/856||INFO_REALIGN_3_PRIME,A|upstream_gene_variant|MODIFIER|EPlOSAG00000047303|EPlOSAG00000047303|transcript|EPlOSAT00000048691|lincRNA||n.-3079_-3047delCGTTGATCCCGTTTCACGCTCGAGGCAGGGTGC|||||3047|,A…
chr01	33716215	TTATATATATATATATATATA	T	3108.49	0/0	0/0	0/0	0/0	0/0	0/0	0/0	0/0	./.	0/0	0/0	0/0	0/0	0/0	0/0	0/0	1/1	0/0	0/0	0/0	0/0	0/0	0/0	0/0	T|downstream_gene_variant|MODIFIER|OS01G0796000|OS01G0796000|transcript|OS01T0796000-01|protein_coding||c.*2318_*2337delTATATATATATATATATATA|||||2095|WARNING_TRANSCRIPT_NO_START_CODON,T|intergenic_region|MODIFIER|OS01G0796000-OS01G0796400|OS01G0796000-OS01G0796400|intergenic_region|OS01G0796000-OS01G0796400|||n.33716216_33716235delTATATATATATATATATATA||||||
chr01	34420765	TAATTGCTCCGATGCATGTTCCAC	T	14530.4	0/0	0/0	0/0	0/0	1/1	0/0	1/1	0/0	0/0	1/1	1/1	1/1	0/0	0/0	0/0	1/1	0/0	0/0	0/0	1/1	0/0	0/0	0/0	0/0	T|upstream_gene_variant|MODIFIER|RNC1|OS01G0810100|transcript|OS01T0810100-01|protein_coding||c.-3895_-3873delGTGGAACATGCATCGGAGCAATT|||||3778|,T|upstream_gene_variant|MODIFIER|CML1|OS01G0810300|transcript|OS01T0810300-01|protein_coding||c.-328_-306delAATTGCTCCGATGCATGTTCCAC|||||245|,T|upstream_gene_variant|MODIFIER|EPlOSAG00000040787|EPlOSAG00000040787|transcript|EPlOSAT00000042175|lincRNA||n.-3…
chr01	34421780	CAACAAGGATTTATTATCTAAAGA	C	13001.4	0/0	0/0	0/0	0/0	1/1	0/0	1/1	0/0	0/0	1/1	1/1	1/1	0/0	0/0	0/0	1/1	0/0	0/0	0/0	1/1	0/0	0/0	0/0	0/0	C|upstream_gene_variant|MODIFIER|RNC1|OS01G0810100|transcript|OS01T0810100-01|protein_coding||c.-4910_-4888delTCTTTAGATAATAAATCCTTGTT|||||4793|,C|upstream_gene_variant|MODIFIER|EPlOSAG00000040787|EPlOSAG00000040787|transcript|EPlOSAT00000042175|lincRNA||n.-2430_-2408delAACAAGGATTTATTATCTAAAGA|||||2430|,C|upstream_gene_variant|MODIFIER|RNC1|OS01G0810100|transcript|OS01T0810100-02|protein_coding||c…
chr01	34731330	TTTCTCCTTGAGTTTTCTTCTCCTATCAGTCACTGCATTATGC	T	6468.34	0/0	1|1	0/0	0/0	1|1	0/0	0/0	0/0	0/0	0/0	0/0	0/0	0/0	0/0	1|1	0/0	1|1	0/0	0/0	0/0	0/0	0/0	0/0	0/0	T|3_prime_UTR_variant|MODIFIER|OS01G0816500|OS01G0816500|transcript|OS01T0816500-01|protein_coding|7/7|c.*138_*179delGCATAATGCAGTGACTGATAGGAGAAGAAAACTCAAGGAGAA|||||138|WARNING_TRANSCRIPT_NO_START_CODON,T|upstream_gene_variant|MODIFIER|EPlOSAG00000038844|EPlOSAG00000038844|transcript|EPlOSAT00000040232|lincRNA||n.-3175_-3134delGCATAATGCAGTGACTGATAGGAGAAGAAAACTCAAGGAGAA|||||3134|,T|upstream_gene_va…
chr01	34749699	A	AGTAGTACTCTCTCCATTTTTAATAGG,AGTAGTACTC	856.46	0/0	./.	0/0	0/0	1/1	0/0	0/0	0/0	0/0	0/0	0/0	0/0	0/0	0/0	./.	0/0	2|2	0/0	0/0	0/0	0/0	0/0	0/0	0/0	AGTAGTACTC|upstream_gene_variant|MODIFIER|OS01G0816550|OS01G0816550|transcript|OS01T0816550-01|lincRNA||n.-3248_-3247insGAGTACTAC|||||3248|,AGTAGTACTCTCTCCATTTTTAATAGG|upstream_gene_variant|MODIFIER|OS01G0816550|OS01G0816550|transcript|OS01T0816550-01|lincRNA||n.-3248_-3247insCCTATTAAAAATGGAGAGAGTACTAC|||||3248|,AGTAGTACTC|upstream_gene_variant|MODIFIER|OS01G0816850|OS01G0816850|transcript|OS01T0…
chr01	34770242	T	TTTATTATTATTATTATTATTATTATTA	6022.78	0/0	1/1	0/0	0/0	0/0	0/0	0/0	0/0	0/0	0/0	0/0	0/0	0/0	0/0	1/1	0/0	1/1	0/0	0/0	0/0	0/0	0/0	0/0	0/0	TTTATTATTATTATTATTATTATTATTA|upstream_gene_variant|MODIFIER|EPlOSAG00000001378|EPlOSAG00000001378|transcript|EPlOSAT00000002766|lincRNA||n.-236_-235insTTATTATTATTATTATTATTATTATTA|||||235|,TTTATTATTATTATTATTATTATTATTA|upstream_gene_variant|MODIFIER|EPlOSAG00000032117|EPlOSAG00000032117|transcript|EPlOSAT00000033505|lincRNA||n.-238_-237insTTATTATTATTATTATTATTATTATTA|||||237|,TTTATTATTATTATTATTATTAT…
chr01	34783245	G	GCACACACACCAATGATAAGTAATTCTACTTATCATCCATTTAAACATATTACTCCCTCCATATACTTTTGATAGTCATATTTCATCTTGT	3071.37	0/0	1/1	0/0	0/0	0/0	0/0	0/0	0/0	0/0	0/0	0/0	0/0	0/0	0/0	0/0	0/0	1/1	0/0	0/0	0/0	0/0	0/0	0/0	0/0	GCACACACACCAATGATAAGTAATTCTACTTATCATCCATTTAAACATATTACTCCCTCCATATACTTTTGATAGTCATATTTCATCTTGT|upstream_gene_variant|MODIFIER|OS01G0817100|OS01G0817100|transcript|OS01T0817100-01|protein_coding||c.-2844_-2843insACAAGATGAAATATGACTATCAAAAGTATATGGAGGGAGTAATATGTTTAAATGGATGATAAGTAGAATTACTTATCATTGGTGTGTGTG|||||2383|,GCACACACACCAATGATAAGTAATTCTACTTATCATCCATTTAAACATATTACTCCCTCCATATACTTTTGATAGTCATATTTCATCTTG…
chr01	34895063	TTTTTTTTTAGATAATGGAATATAAAAAAAAA	T	23498	0/0	0/0	1/1	1/1	0/0	1/1	0/0	1/1	1/1	0/0	0/0	0/0	1/1	1/1	0/0	0/0	0/0	0/0	1/1	0/0	1/1	1/1	1/1	0/0	T|upstream_gene_variant|MODIFIER|EPlOSAG00000017355|EPlOSAG00000017355|transcript|EPlOSAT00000018743|lincRNA||n.-4920_-4890delTTTTTTTTTATATTCCATTATCTAAAAAAAA|||||4890|,T|upstream_gene_variant|MODIFIER|EPlOSAG00000017012|EPlOSAG00000017012|transcript|EPlOSAT00000018400|lincRNA||n.-1790_-1760delTTTTTTTTTATATTCCATTATCTAAAAAAAA|||||1760|,T|upstream_gene_variant|MODIFIER|OS01G0819100|OS01G0819100|tran…
chr01	34896314	G	GCCCTGAGAACAATACGAGCACATCCTCC	22869.7	0/0	0/0	1|1	1|1	0/0	1|1	0/0	1|1	1|1	0/0	0/0	0/0	1|1	1|1	0/0	0/0	0/0	0/0	0/0	0/0	1|1	1|1	1|1	0/0	GCCCTGAGAACAATACGAGCACATCCTCC|upstream_gene_variant|MODIFIER|EPlOSAG00000017012|EPlOSAG00000017012|transcript|EPlOSAT00000018400|lincRNA||n.-3011_-3010insGGAGGATGTGCTCGTATTGTTCTCAGGG|||||3011|,GCCCTGAGAACAATACGAGCACATCCTCC|upstream_gene_variant|MODIFIER|OS01G0819100|OS01G0819100|transcript|OS01T0819100-01|protein_coding||c.-3676_-3675insCCCTGAGAACAATACGAGCACATCCTCC|||||3673|,GCCCTGAGAACAATACGAGCA…
chr01	35107893	CGATTTGAAAGTTTTCGAATCTT	C	19161.2	0/0	0/0	./.	./.	0/0	./.	0/0	1/1	1/1	0/0	0/0	0/0	./.	1/1	0/0	0/0	0/0	0/0	./.	0/0	1/1	1/1	1/1	0/0	C|intergenic_region|MODIFIER|OS01G0822200-OS01G0822501|OS01G0822200-OS01G0822501|intergenic_region|OS01G0822200-OS01G0822501|||n.35107894_35107915delGATTTGAAAGTTTTCGAATCTT||||||
chr01	35218751	G	GATGGAATGAATCTACTTTTAGGGGTGT	855.81	0/0	0/0	0/0	0/0	0/0	0/0	0/0	0/0	0/0	0/0	1/1	0/0	0/0	0/0	0/0	1/1	0/0	0/0	0/0	0/0	0/0	0/0	0/0	0/0	GATGGAATGAATCTACTTTTAGGGGTGT|downstream_gene_variant|MODIFIER|EPlOSAG00000040131|EPlOSAG00000040131|transcript|EPlOSAT00000041519|lincRNA||n.*2810_*2811insATGGAATGAATCTACTTTTAGGGGTGT|||||2811|,GATGGAATGAATCTACTTTTAGGGGTGT|intergenic_region|MODIFIER|EPlOSAG00000040131-OS01G0824500|EPlOSAG00000040131-OS01G0824500|intergenic_region|EPlOSAG00000040131-OS01G0824500|||n.35218751_35218752insATGGAATGAATC…
chr01	35219317	GGCGTCATCGTCCCATAGCTTCACGTCCC	G	7338.96	0/0	0/0	0/0	0/0	1|1	0/0	1|1	0/0	0/0	0/0	1|1	1|1	0/0	0/0	0/0	1|1	0/0	0/0	0/0	1|1	0/0	0/0	0/0	0/0	G|downstream_gene_variant|MODIFIER|EPlOSAG00000040131|EPlOSAG00000040131|transcript|EPlOSAT00000041519|lincRNA||n.*3377_*3404delGCGTCATCGTCCCATAGCTTCACGTCCC|||||3377|,G|intergenic_region|MODIFIER|EPlOSAG00000040131-OS01G0824500|EPlOSAG00000040131-OS01G0824500|intergenic_region|EPlOSAG00000040131-OS01G0824500|||n.35219318_35219345delGCGTCATCGTCCCATAGCTTCACGTCCC||||||
chr01	35241385	G	GTGTTTGAGAACGAGGGGATCGAGGAGATTGGGAAGATACGTAAAA	10684	0/0	0/0	0/0	0/0	1/1	0/0	1/1	0/0	0/0	0/0	1/1	1/1	0/0	0/0	0/0	1/1	0/0	0/0	0/0	1/1	0/0	0/0	0/0	0/0	GTGTTTGAGAACGAGGGGATCGAGGAGATTGGGAAGATACGTAAAA|upstream_gene_variant|MODIFIER|EPlOSAG00000048160|EPlOSAG00000048160|transcript|EPlOSAT00000049548|lincRNA||n.-4573_-4572insTTTTACGTATCTTCCCAATCTCCTCGATCCCCTCGTTCTCAAACA|||||4573|,GTGTTTGAGAACGAGGGGATCGAGGAGATTGGGAAGATACGTAAAA|upstream_gene_variant|MODIFIER|EPlOSAG00000023272|EPlOSAG00000023272|transcript|EPlOSAT00000024660|lincRNA||n.-2225_-2224insT…
chr01	35249440	T	TAAAAACCTCTCGGGCAAACACACTCCAAACTAATTCTAATAC	4696.63	0/0	0/0	0/0	0/0	1/1	0/0	1/1	0/0	0/0	0/0	1/1	1/1	0/0	0/0	0/0	./.	0/0	0/0	0/0	1/1	0/0	0/0	0/0	0/0	TAAAAACCTCTCGGGCAAACACACTCCAAACTAATTCTAATAC|upstream_gene_variant|MODIFIER|EPlOSAG00000039329|EPlOSAG00000039329|transcript|EPlOSAT00000040717|lincRNA||n.-3595_-3594insAAAAACCTCTCGGGCAAACACACTCCAAACTAATTCTAATAC|||||3594|,TAAAAACCTCTCGGGCAAACACACTCCAAACTAATTCTAATAC|downstream_gene_variant|MODIFIER|OS01G0824800|OS01G0824800|transcript|OS01T0824800-01|protein_coding||c.*3048_*3049insAAAAACCTCTCGGGCA…
chr01	35259855	CTCTCTCTCTCTCTCTCTCTCT	C,*	14599	./.	2/2	0/0	0/0	1/1	2/2	1/1	./.	0/0	0/0	1/1	1/1	0/0	0/0	2/2	1/1	2/2	0/0	0/0	1/1	0/0	0/0	0/0	0/0	C|upstream_gene_variant|MODIFIER|EPlOSAG00000009995|EPlOSAG00000009995|transcript|EPlOSAT00000011383|lincRNA||n.-1315_-1295delTCTCTCTCTCTCTCTCTCTCT|||||1315|,C|downstream_gene_variant|MODIFIER|OS01G0825000|OS01G0825000|transcript|OS01T0825000-01|protein_coding||c.*995_*1015delTCTCTCTCTCTCTCTCTCTCT|||||794|,C|downstream_gene_variant|MODIFIER|EPlOSAG00000000221|EPlOSAG00000000221|transcript|EPlOSAT…
chr01	35298248	C	CCAAGCTGGGAGGGGGCAGCCG	494.39	0/0	./.	0/0	0/0	0/0	0/0	0/0	0/0	0/0	0/0	0/0	0/0	0/0	0/0	./.	0/0	1/1	0/0	0/0	0/0	0/0	0/0	0/0	0/0	CCAAGCTGGGAGGGGGCAGCCG|upstream_gene_variant|MODIFIER|EPlOSAG00000037022|EPlOSAG00000037022|transcript|EPlOSAT00000038410|lincRNA||n.-4443_-4442insCAAGCTGGGAGGGGGCAGCCG|||||4442|,CCAAGCTGGGAGGGGGCAGCCG|downstream_gene_variant|MODIFIER|EPlOSAG00000034298|EPlOSAG00000034298|transcript|EPlOSAT00000035686|lincRNA||n.*4442_*4443insCGGCTGCCCCCTCCCAGCTTG|||||4442|,CCAAGCTGGGAGGGGGCAGCCG|intergenic_regio…
chr01	35374475	AATTAACCATCTGAATCAGATTAAGAT	A	3491.79	0/0	0/0	0/0	0/0	0/0	0/0	0/0	1/1	0/0	0/0	0/0	0/0	1/1	0/0	0/0	0/0	0/0	0/0	0/0	0/0	0/0	0/0	0/0	0/0	A|upstream_gene_variant|MODIFIER|EPlOSAG00000032282|EPlOSAG00000032282|transcript|EPlOSAT00000033670|lincRNA||n.-2175_-2150delATTAACCATCTGAATCAGATTAAGAT|||||2175|,A|downstream_gene_variant|MODIFIER|EPlOSAG00000046819|EPlOSAG00000046819|transcript|EPlOSAT00000048207|lincRNA||n.*72_*97delATCTTAATCTGATTCAGATGGTTAAT|||||97|,A|downstream_gene_variant|MODIFIER|EPlOSAG00000030629|EPlOSAG00000030629|tran…
chr01	35405448	G	GTAGGTACAATAGCAGGCTAT	25720	0/0	1/1	0/0	0/0	1/1	0/0	1/1	1/1	0/0	0/0	1/1	1/1	1/1	0/0	1/1	1/1	1/1	0/0	0/0	1/1	0/0	0/0	0/0	0/0	GTAGGTACAATAGCAGGCTAT|upstream_gene_variant|MODIFIER|EPlOSAG00000031403|EPlOSAG00000031403|transcript|EPlOSAT00000032791|lincRNA||n.-4717_-4716insATAGCCTGCTATTGTACCTA|||||4717|,GTAGGTACAATAGCAGGCTAT|upstream_gene_variant|MODIFIER|EPlOSAG00000050035|EPlOSAG00000050035|transcript|EPlOSAT00000051423|lincRNA||n.-230_-229insTAGGTACAATAGCAGGCTAT|||||229|,GTAGGTACAATAGCAGGCTAT|upstream_gene_variant|MODI…
chr01	35465569	C	CTATTCCTCTACCAGCCCATCTAGCTTCCTCCCTCCAA	27875	0/0	1/1	0/0	0/0	1/1	0/0	1/1	1/1	0/0	0/0	1/1	1/1	1/1	0/0	1/1	1/1	1/1	0/0	0/0	1/1	0/0	0/0	0/0	0/0	CTATTCCTCTACCAGCCCATCTAGCTTCCTCCCTCCAA|upstream_gene_variant|MODIFIER|EPlOSAG00000048484|EPlOSAG00000048484|transcript|EPlOSAT00000049872|lincRNA||n.-3913_-3912insTTGGAGGGAGGAAGCTAGATGGGCTGGTAGAGGAATA|||||3913|,CTATTCCTCTACCAGCCCATCTAGCTTCCTCCCTCCAA|downstream_gene_variant|MODIFIER|EPlOSAG00000048473|EPlOSAG00000048473|transcript|EPlOSAT00000049861|lincRNA||n.*3914_*3915insTATTCCTCTACCAGCCCATCTAG…
chr01	35645086	TTATATATATATATATATATATATATATATATA	T	4202.86	./.	0/0	./.	0/0	0/0	0/0	0/0	0/0	0/0	1/1	1/1	0/0	0/0	0/0	0/0	1/1	0/0	0/0	0/0	1/1	0/0	0/0	./.	0/0	T|downstream_gene_variant|MODIFIER|OS01G0832600|OS01G0832600|transcript|OS01T0832600-01|protein_coding||c.*4437_*4468delTATATATATATATATATATATATATATATATA|||||4154|,T|downstream_gene_variant|MODIFIER|EPlOSAG00000030456|EPlOSAG00000030456|transcript|EPlOSAT00000031844|lincRNA||n.*253_*284delTATATATATATATATATATATATATATATATA|||||253|,T|intergenic_region|MODIFIER|EPlOSAG00000030456-EPlOSAG00000025098|E…
chr01	35728391	G	GATCGAATTGTATCATCGGGTATAAC	11702.8	0/0	1/1	0/0	0/0	0/0	0/0	0/0	0/0	0/0	0/0	0/0	0/0	0/0	0/0	1/1	0/0	1/1	0/0	0/0	0/0	0/0	0/0	0/0	0/0	GATCGAATTGTATCATCGGGTATAAC|upstream_gene_variant|MODIFIER|OS01G0834200|OS01G0834200|transcript|OS01T0834200-01|protein_coding||c.-4465_-4464insATCGAATTGTATCATCGGGTATAAC|||||4273|,GATCGAATTGTATCATCGGGTATAAC|upstream_gene_variant|MODIFIER|OS01G0834200|OS01G0834200|transcript|OS01T0834200-02|protein_coding||c.-4465_-4464insATCGAATTGTATCATCGGGTATAAC|||||4335|,GATCGAATTGTATCATCGGGTATAAC|upstream_gene_…
chr01	35780144	GGCCGTCCCCTTTTCCATCGGC	G	6299.73	0/0	1/1	0/0	0/0	0/0	0/0	0/0	0/0	0/0	0/0	0/0	0/0	0/0	0/0	1/1	0/0	1/1	0/0	0/0	0/0	0/0	0/0	0/0	0/0	G|upstream_gene_variant|MODIFIER|OS01G0834800|OS01G0834800|transcript|OS01T0834800-00|protein_coding||c.-3658_-3638delGCCGATGGAAAAGGGGACGGC|||||3638|,G|upstream_gene_variant|MODIFIER|EPlOSAG00000030344|EPlOSAG00000030344|transcript|EPlOSAT00000031732|lincRNA||n.-2037_-2017delGCCGATGGAAAAGGGGACGGC|||||2017|,G|upstream_gene_variant|MODIFIER|EPlOSAG00000028360|EPlOSAG00000028360|transcript|EPlOSAT00…
chr01	36456067	TACAGGCTCCAAAATCTCTTTGCTTA	T	2088.06	0/0	0/0	0/0	0/0	0/0	0/0	0/0	0/0	0/0	0/0	0/0	0/0	0/0	0/0	0/0	0/0	0/0	1|1	0/0	0/0	0/0	0/0	0/0	0/0	T|upstream_gene_variant|MODIFIER|EPlOSAG00000037541|EPlOSAG00000037541|transcript|EPlOSAT00000038929|lincRNA||n.-2568_-2544delTAAGCAAAGAGATTTTGGAGCCTGT|||||2544|,T|upstream_gene_variant|MODIFIER|EPlOSAG00000028033|EPlOSAG00000028033|transcript|EPlOSAT00000029421|lincRNA||n.-2382_-2358delTAAGCAAAGAGATTTTGGAGCCTGT|||||2358|,T|downstream_gene_variant|MODIFIER|EPlOSAG00000037301|EPlOSAG00000037301|tr…
chr01	36461654	GATGGTCCGCTGATCGGATGGATCGGGCCGTGCGCGCGTGAGCCTATT	G	14235.3	0/0	1/1	1/1	0/0	0/0	0/0	0/0	0/0	1/1	0/0	0/0	0/0	0/0	1/1	0/0	0/0	0/0	1/1	./.	0/0	1/1	1/1	1/1	0/0	G|downstream_gene_variant|MODIFIER|OS01G0848550|OS01G0848550|transcript|OS01T0848550-01|protein_coding||c.*4975_*5021delAATAGGCTCACGCGCGCACGGCCCGATCCATCCGATCAGCGGACCAT|||||4761|,G|intergenic_region|MODIFIER|EPlOSAG00000028300-OS01G0848550|EPlOSAG00000028300-OS01G0848550|intergenic_region|EPlOSAG00000028300-OS01G0848550|||n.36461655_36461701delATGGTCCGCTGATCGGATGGATCGGGCCGTGCGCGCGTGAGCCTATT||||||
chr01	36524911	T	TCCGCTCTTTTAGGTTGTACGC	4496.57	0/0	./.	./.	./.	0/0	./.	0/0	0/0	1/1	0/0	0/0	0/0	0/0	./.	1/1	0/0	./.	1/1	./.	0/0	1/1	./.	1/1	0/0	TCCGCTCTTTTAGGTTGTACGC|upstream_gene_variant|MODIFIER|EPlOSAG00000012869|EPlOSAG00000012869|transcript|EPlOSAT00000014257|lincRNA||n.-3425_-3424insGCGTACAACCTAAAAGAGCGG|||||3425|,TCCGCTCTTTTAGGTTGTACGC|upstream_gene_variant|MODIFIER|OS01G0850000|OS01G0850000|transcript|OS01T0850000-01|protein_coding||c.-3192_-3191insCCGCTCTTTTAGGTTGTACGC|||||3130|,TCCGCTCTTTTAGGTTGTACGC|downstream_gene_variant|MO…
chr01	36703321	A	ATATAAGTAATTGAAAAAGTT	931.17	0/0	./.	./.	0/0	0/0	0/0	0/0	0/0	1|1	0/0	0/0	0/0	0/0	0/0	0/0	0/0	0/0	1|1	./.	0/0	0/0	./.	./.	0/0	ATATAAGTAATTGAAAAAGTT|upstream_gene_variant|MODIFIER|OS01G0852400|OS01G0852400|transcript|OS01T0852400-00|protein_coding||c.-4359_-4358insAACTTTTTCAATTACTTATA|||||4359|,ATATAAGTAATTGAAAAAGTT|intergenic_region|MODIFIER|OS01G0852400-EPlOSAG00000026545|OS01G0852400-EPlOSAG00000026545|intergenic_region|OS01G0852400-EPlOSAG00000026545|||n.36703321_36703322insTATAAGTAATTGAAAAAGTT||||||
chr01	36793288	AATATATATATATATATATATATATATATATAT	A	9270.65	0/0	1/1	1/1	0/0	0/0	0/0	0/0	0/0	1/1	0/0	0/0	0/0	0/0	0/0	./.	./.	0/0	1/1	0/0	0/0	0/0	1/1	1/1	0/0	A|upstream_gene_variant|MODIFIER|EPlOSAG00000036000|EPlOSAG00000036000|transcript|EPlOSAT00000037388|lincRNA||n.-1981_-1950delATATATATATATATATATATATATATATATAT|||||1950|,A|upstream_gene_variant|MODIFIER|EPlOSAG00000028357|EPlOSAG00000028357|transcript|EPlOSAT00000029745|lincRNA||n.-360_-329delATATATATATATATATATATATATATATATAT|||||360|,A|upstream_gene_variant|MODIFIER|OS01G0854000|OS01G0854000|trans…
chr01	37303166	C	CTACCAATTCGATATTGATTTGTATTATCAGTAGAAGTTTCTATCCATATCAAGAAATAAGAGGTATTTCCACCA	58629	0/0	1/1	1/1	1/1	1/1	1/1	0/0	0/0	1/1	1/1	1/1	1/1	0/0	1/1	1/1	1/1	1/1	1/1	0/0	1/1	1/1	1/1	1/1	0/0	CTACCAATTCGATATTGATTTGTATTATCAGTAGAAGTTTCTATCCATATCAAGAAATAAGAGGTATTTCCACCA|upstream_gene_variant|MODIFIER|OS01G0861700|OS01G0861700|transcript|OS01T0861700-00|protein_coding||c.-458_-457insTACCAATTCGATATTGATTTGTATTATCAGTAGAAGTTTCTATCCATATCAAGAAATAAGAGGTATTTCCACCA|||||457|,CTACCAATTCGATATTGATTTGTATTATCAGTAGAAGTTTCTATCCATATCAAGAAATAAGAGGTATTTCCACCA|downstream_gene_variant|MODIFIER|OS01G0861400|OS0…
chr01	37342547	T	TTATATATATATATATATATATATATATATATATATATATATATATA	540.86	0/0	0/0	0/0	0/0	0/0	0/0	./.	0/0	./.	0/0	0/0	0/0	0/0	1/1	0/0	0/0	0/0	0/0	0/0	./.	0/0	0/0	0/0	0/0	TTATATATATATATATATATATATATATATATATATATATATATATA|intergenic_region|MODIFIER|OS01G0862800-OS01G0863100|OS01G0862800-OS01G0863100|intergenic_region|OS01G0862800-OS01G0863100|||n.37342547_37342548insTATATATATATATATATATATATATATATATATATATATATATATA||||||
chr01	37346397	GTATATATATATATATATGTATA	G	11480.6	0/0	1|1	1/1	./.	0/0	./.	0/0	0|0	0/0	0/0	1|1	1/1	0/0	1|1	1|1	0/0	1|1	./.	0/0	1|1	0/0	1/1	1|1	0/0	G|downstream_gene_variant|MODIFIER|OS01G0863100|OS01G0863100|transcript|OS01T0863100-01|protein_coding||c.*3548_*3569delTATACATATATATATATATATA|||||3000|WARNING_TRANSCRIPT_NO_START_CODON,G|intergenic_region|MODIFIER|OS01G0862800-OS01G0863100|OS01G0862800-OS01G0863100|intergenic_region|OS01G0862800-OS01G0863100|||n.37346398_37346419delTATATATATATATATATGTATA||||||
chr01	37715189	GCCCTCATACAAGCCTGGGGGTAGAGA	G	5791.34	0/0	0/0	0/0	0/0	0/0	0/0	1/1	0/0	0/0	0/0	1/1	0/0	1/1	0/0	0/0	1/1	0/0	0/0	0/0	0/0	0/0	0/0	0/0	0/0	G|3_prime_UTR_variant|MODIFIER|OS01G0870100|OS01G0870100|transcript|OS01T0870100-01|protein_coding|13/13|c.*267_*292delTCTCTACCCCCAGGCTTGTATGAGGG|||||267|,G|downstream_gene_variant|MODIFIER|EPlOSAG00000021988|EPlOSAG00000021988|transcript|EPlOSAT00000023376|lincRNA||n.*3180_*3205delCCCTCATACAAGCCTGGGGGTAGAGA|||||3180|,G|downstream_gene_variant|MODIFIER|OS01G0869900|OS01G0869900|transcript|OS01T08…
chr01	37810180	CATATATATATACATATATATAT	C,CATATATATACATATATATAT	5369.96	0/0	0/0	1|1	1/1	1/1	1/1	2|2	0/0	1|1	1|1	./.	0/0	1/1	./.	2/2	./.	2/2	0/0	1/1	0/0	./.	0/0	0/0	0/0	C|upstream_gene_variant|MODIFIER|EPlOSAG00000030665|EPlOSAG00000030665|transcript|EPlOSAT00000032053|lincRNA||n.-2255_-2234delATATATATATGTATATATATAT|||||2234|,CATATATATACATATATATAT|upstream_gene_variant|MODIFIER|EPlOSAG00000030665|EPlOSAG00000030665|transcript|EPlOSAT00000032053|lincRNA||n.-2244_-2243delTA|||||2243|,C|upstream_gene_variant|MODIFIER|OS01G0871900|OS01G0871900|transcript|OS01T087190…
chr01	37810350	CATATATATATATATATATATAT	C,CATATATATATATATATATATATATATATATAT	1018.06	0/0	./.	1|1	2/2	0/0	./.	./.	0/0	0/0	./.	./.	0/0	0/0	./.	0/0	./.	./.	./.	./.	0/0	0/0	./.	0/0	0/0	C|upstream_gene_variant|MODIFIER|EPlOSAG00000030665|EPlOSAG00000030665|transcript|EPlOSAT00000032053|lincRNA||n.-2425_-2404delATATATATATATATATATATAT|||||2404|,CATATATATATATATATATATATATATATATAT|upstream_gene_variant|MODIFIER|EPlOSAG00000030665|EPlOSAG00000030665|transcript|EPlOSAT00000032053|lincRNA||n.-2426_-2425insATATATATAT|||||2426|,C|upstream_gene_variant|MODIFIER|EPlOSAG00000013337|EPlOSAG00…
chr01	38221784	T	TTTATTATTATTATTATTATTA,TTTATTATTATTATTATTATTATTA,TTTATTATTATTATTATTATTATTATTA,TTTATTATTATTATTATTA,TTTATTATTATTA	7716.74	0/0	3/3	4/4	./.	0/0	4/4	0/0	0/0	0/0	0/0	0/0	1/1	./.	1/1	./.	./.	5/5	0/0	0/0	4/4	2/2	3/3	.	0/0	TTTATTATTATTA|upstream_gene_variant|MODIFIER|OS01G0880400|OS01G0880400|transcript|OS01T0880400-01|protein_coding||c.-5121_-5120insTAATAATAATAA|||||4651|,TTTATTATTATTATTATTA|upstream_gene_variant|MODIFIER|OS01G0880400|OS01G0880400|transcript|OS01T0880400-01|protein_coding||c.-5121_-5120insTAATAATAATAATAATAA|||||4651|,TTTATTATTATTATTATTATTA|upstream_gene_variant|MODIFIER|OS01G0880400|OS01G0880400|t…
chr01	38294743	T	TATAATAATAATAATAATAATAATA	254.53	0/0	0/0	0/0	0/0	0/0	0/0	0/0	0/0	0/0	0/0	0/0	0/0	0/0	0/0	0/0	1/1	0/0	0/0	0/0	0/0	0/0	0/0	0/0	0/0	TATAATAATAATAATAATAATAATA|upstream_gene_variant|MODIFIER|OS01G0882200|OS01G0882200|transcript|OS01T0882200-00|protein_coding||c.-2400_-2399insTATTATTATTATTATTATTATTAT|||||2292|WARNING_TRANSCRIPT_NO_START_CODON,TATAATAATAATAATAATAATAATA|downstream_gene_variant|MODIFIER|OS01G0882100|OS01G0882100|transcript|OS01T0882100-00|protein_coding||c.*3874_*3875insATAATAATAATAATAATAATAATA|||||3774|WARNING_TRA…
chr01	38338612	G	GTATATATATATATATATATATATATATATATATATATA,GTATATATATATATATATATATATATATATATATA	942.19	./.	0/0	0/0	0/0	0/0	0/0	0/0	0/0	0/0	0/0	0/0	0/0	0/0	0/0	0/0	0/0	0/0	0/0	0/0	0/0	./.	2/2	1/1	0/0	GTATATATATATATATATATATATATATATATATA|downstream_gene_variant|MODIFIER|OS01G0883600|OS01G0883600|transcript|OS01T0883600-01|lincRNA||n.*3924_*3925insTATATATATATATATATATATATATATATATATA|||||3925|,GTATATATATATATATATATATATATATATATATATATA|downstream_gene_variant|MODIFIER|OS01G0883600|OS01G0883600|transcript|OS01T0883600-01|lincRNA||n.*3924_*3925insTATATATATATATATATATATATATATATATATATATA|||||3925|,GTATATA…
chr01	38444387	GTCTAGATTCATTAACATCAATATGTATCTA	G	6581.34	0/0	0/0	0/0	0/0	0/0	0/0	0/0	0/0	0/0	0/0	1/1	0/0	0/0	0/0	1/1	0/0	1/1	1/1	0/0	0/0	0/0	0/0	0/0	0/0	G|upstream_gene_variant|MODIFIER|OS01G0885000|OS01G0885000|transcript|OS01T0885000-02|protein_coding||c.-630_-601delTCTAGATTCATTAACATCAATATGTATCTA|||||628|WARNING_TRANSCRIPT_NO_START_CODON,G|downstream_gene_variant|MODIFIER|OS01G0885200|OS01G0885200|transcript|OS01T0885200-01|protein_coding||c.*3978_*4007delTAGATACATATTGATGTTAATGAATCTAGA|||||3760|,G|downstream_gene_variant|MODIFIER|OS01G0885200|O…
chr01	38446121	GCCACAGCATGAGAGTCCCTGCTGCCATCTTCCTAAGATGAAGAGAAGCTTATTGCTCGTAGCCTCATACTGACTC	G	4052.33	0/0	0/0	0/0	0/0	0/0	0/0	0/0	0/0	0/0	0/0	1/1	0/0	0/0	0/0	1/1	0/0	1/1	1/1	0/0	0/0	0/0	0/0	0/0	0/0	G|stop_lost&conservative_inframe_deletion|HIGH|OS01G0885000|OS01G0885000|transcript|OS01T0885000-01|protein_coding|3/3|c.326_*64delCCACAGCATGAGAGTCCCTGCTGCCATCTTCCTAAGATGAAGAGAAGCTTATTGCTCGTAGCCTCATACTGACTC|p.Ala109_Ter112delins???|398/695|326/336|109/111||,G|stop_lost&conservative_inframe_deletion|HIGH|OS01G0885000|OS01G0885000|transcript|OS01T0885000-02|protein_coding|2/2|c.104_*64delCCACAGCATG…
chr01	38453675	CAATTATCACCTGATACGTGGTAGAATCACATGATACCTGATAAGTATCATCTGATACCGGTTAGGTATTAGGACCTGATACCTT	C	8158.73	0/0	0/0	0/0	0/0	0/0	0/0	0/0	0/0	0/0	0/0	1|1	0/0	0/0	0/0	0/0	0/0	1|1	1|1	0/0	0/0	0/0	0/0	0/0	0/0	C|upstream_gene_variant|MODIFIER|OS01G0885200|OS01G0885200|transcript|OS01T0885200-01|protein_coding||c.-4171_-4088delAAGGTATCAGGTCCTAATACCTAACCGGTATCAGATGATACTTATCAGGTATCATGTGATTCTACCACGTATCAGGTGATAATT|||||3190|,C|upstream_gene_variant|MODIFIER|EPlOSAG00000028158|EPlOSAG00000028158|transcript|EPlOSAT00000029546|lincRNA||n.-953_-870delAATTATCACCTGATACGTGGTAGAATCACATGATACCTGATAAGTATCATCTGATACCGGTT…
chr01	38454570	G	GCTTTTTAAGATGATAAAAAACATGCATATTAAAATTTTAC	7641.37	0/0	0/0	0/0	0/0	0/0	0/0	0/0	0/0	0/0	0/0	1/1	0/0	0/0	0/0	1/1	0/0	1/1	1/1	0/0	0/0	0/0	0/0	0/0	0/0	GCTTTTTAAGATGATAAAAAACATGCATATTAAAATTTTAC|upstream_gene_variant|MODIFIER|OS01G0885200|OS01G0885200|transcript|OS01T0885200-01|protein_coding||c.-4983_-4982insGTAAAATTTTAATATGCATGTTTTTTATCATCTTAAAAAG|||||4085|,GCTTTTTAAGATGATAAAAAACATGCATATTAAAATTTTAC|upstream_gene_variant|MODIFIER|EPlOSAG00000028158|EPlOSAG00000028158|transcript|EPlOSAT00000029546|lincRNA||n.-59_-58insCTTTTTAAGATGATAAAAAACATGCATA…
chr01	38463224	TTTTTTAATGATTCGTCTATATTTAC	T	8610.34	0/0	0/0	0/0	0/0	0/0	0/0	0/0	0/0	0/0	0/0	1|1	0/0	0/0	0/0	1|1	0/0	1|1	1|1	0/0	0/0	0/0	0/0	0/0	0/0	T|splice_region_variant&non_coding_transcript_exon_variant|LOW|EPlOSAG00000014707|EPlOSAG00000014707|transcript|EPlOSAT00000016095|lincRNA|1/1|n.21_*5delTTTTTAATGATTCGTCTATATTTAC||||||,T|upstream_gene_variant|MODIFIER|OS01G0885300|OS01G0885300|transcript|OS01T0885300-01|protein_coding||c.-4822_-4798delGTAAATATAGACGAATCATTAAAAA|||||2696|,T|upstream_gene_variant|MODIFIER|OS01G0885300|OS01G0885300|t…
chr01	38463251	ATATATATACTATATATCATTC	A	10504.3	0/0	0/0	0/0	0/0	0/0	0/0	0/0	0/0	0/0	0/0	1|1	0/0	0/0	0/0	1|1	0/0	1|1	1|1	0/0	0/0	0/0	0/0	0/0	0/0	A|upstream_gene_variant|MODIFIER|OS01G0885300|OS01G0885300|transcript|OS01T0885300-01|protein_coding||c.-4845_-4825delGAATGATATATAGTATATATA|||||2723|,A|upstream_gene_variant|MODIFIER|OS01G0885300|OS01G0885300|transcript|OS01T0885300-03|protein_coding||c.-4845_-4825delGAATGATATATAGTATATATA|||||2990|,A|downstream_gene_variant|MODIFIER|EPlOSAG00000014707|EPlOSAG00000014707|transcript|EPlOSAT00000016…
chr01	38468272	GATTATCACTACCTAGTTCTCAAAAAAAAAAA	G	4999.34	0/0	0/0	0/0	0/0	0/0	0/0	0/0	0/0	0/0	0/0	1/1	0/0	0/0	0/0	1/1	0/0	1/1	1/1	0/0	0/0	0/0	0/0	0/0	0/0	G|upstream_gene_variant|MODIFIER|EPlOSAG00000010594|EPlOSAG00000010594|transcript|EPlOSAT00000011982|lincRNA||n.-728_-698delTTTTTTTTTTTGAGAACTAGGTAGTGATAAT|||||698|,G|downstream_gene_variant|MODIFIER|EPlOSAG00000016648|EPlOSAG00000016648|transcript|EPlOSAT00000018036|lincRNA||n.*859_*889delTTTTTTTTTTTGAGAACTAGGTAGTGATAAT|||||889|,G|downstream_gene_variant|MODIFIER|OS01G0885500|OS01G0885500|transc…
chr01	38501086	T	TCTCTCTCTCTCTCTCTCTCTC,TCTCTCTCTCTCTCTC	5499.91	0/0	0/0	0/0	0/0	0/0	0/0	0/0	0/0	0/0	0/0	2|2	0/0	0/0	0/0	1|1	0/0	1|1	1|1	0/0	0/0	0/0	0/0	0/0	0/0	TCTCTCTCTCTCTCTC|upstream_gene_variant|MODIFIER|EPlOSAG00000029566|EPlOSAG00000029566|transcript|EPlOSAT00000030954|lincRNA||n.-4484_-4483insGAGAGAGAGAGAGAG|||||4484|,TCTCTCTCTCTCTCTCTCTCTC|upstream_gene_variant|MODIFIER|EPlOSAG00000029566|EPlOSAG00000029566|transcript|EPlOSAT00000030954|lincRNA||n.-4484_-4483insGAGAGAGAGAGAGAGAGAGAG|||||4484|,TCTCTCTCTCTCTCTC|upstream_gene_variant|MODIFIER|EPlOS…
chr01	38514828	G	GACGGGAATATATATCTCACACCT	13331.4	0/0	0/0	0/0	0/0	0/0	0/0	0/0	0/0	0/0	0/0	1/1	0/0	0/0	0/0	1/1	0/0	1/1	1/1	0/0	0/0	0/0	0/0	0/0	0/0	GACGGGAATATATATCTCACACCT|upstream_gene_variant|MODIFIER|EPlOSAG00000015151|EPlOSAG00000015151|transcript|EPlOSAT00000016539|lincRNA||n.-3531_-3530insAGGTGTGAGATATATATTCCCGT|||||3531|,GACGGGAATATATATCTCACACCT|upstream_gene_variant|MODIFIER|EPlOSAG00000026983|EPlOSAG00000026983|transcript|EPlOSAT00000028371|lincRNA||n.-1092_-1091insAGGTGTGAGATATATATTCCCGT|||||1092|,GACGGGAATATATATCTCACACCT|downstre…
chr01	38517078	CCTATAATCTAGAATTGCCTTGTTTTCTTTTTTAAACCAGACGTGTATTACTAT	C	7270.34	0/0	0/0	0/0	0/0	0/0	0/0	0/0	0/0	0/0	0/0	1/1	0/0	0/0	0/0	1/1	0/0	1/1	1/1	0/0	0/0	0/0	0/0	0/0	0/0	C|upstream_gene_variant|MODIFIER|EPlOSAG00000026983|EPlOSAG00000026983|transcript|EPlOSAT00000028371|lincRNA||n.-3394_-3342delATAGTAATACACGTCTGGTTTAAAAAAGAAAACAAGGCAATTCTAGATTATAG|||||3342|,C|upstream_gene_variant|MODIFIER|OS01G0886350|OS01G0886350|transcript|OS01T0886350-01|protein_coding||c.-917_-865delATAGTAATACACGTCTGGTTTAAAAAAGAAAACAAGGCAATTCTAGATTATAG|||||277|,C|downstream_gene_variant|MODI…
chr01	38541604	C	CTGGCTGGCGATGGCGGCTGG	9928.7	0/0	0/0	0/0	0/0	0/0	0/0	0/0	0/0	0/0	0/0	1|1	0/0	0/0	0/0	1|1	0/0	1/1	1|1	0/0	0/0	0/0	0/0	0/0	0/0	CTGGCTGGCGATGGCGGCTGG|upstream_gene_variant|MODIFIER|EPlOSAG00000002334|EPlOSAG00000002334|transcript|EPlOSAT00000003722|lincRNA||n.-3635_-3634insCCAGCCGCCATCGCCAGCCA|||||3635|,CTGGCTGGCGATGGCGGCTGG|upstream_gene_variant|MODIFIER|OS01G0887100|OS01G0887100|transcript|OS01T0887100-01|protein_coding||c.-2458_-2457insTGGCTGGCGATGGCGGCTGG|||||2455|WARNING_TRANSCRIPT_NO_START_CODON,CTGGCTGGCGATGGCGGCTG…
chr01	38545729	CCCAGAATATTATCATGTAGCCCAGACA	C	11907.3	0/0	0/0	0/0	0/0	0/0	0/0	0/0	0/0	0/0	0/0	1/1	0/0	0/0	0/0	1/1	0/0	1/1	1/1	0/0	0/0	0/0	0/0	0/0	0/0	C|3_prime_UTR_variant|MODIFIER|OS01G0887100|OS01G0887100|transcript|OS01T0887100-01|protein_coding|8/8|c.*102_*128delATATTATCATGTAGCCCAGACACCAGA|||||102|WARNING_TRANSCRIPT_NO_START_CODON&INFO_REALIGN_3_PRIME,C|downstream_gene_variant|MODIFIER|OS01G0887400|OS01G0887400|transcript|OS01T0887400-01|protein_coding||c.*445_*471delTGTCTGGGCTACATGATAATATTCTGG|||||37|
chr01	38556771	G	GCGGTCAGACCGGCCGTTACACTC	12853.4	0/0	0/0	0/0	0/0	0/0	0/0	0/0	0/0	0/0	0/0	1/1	0/0	0/0	0/0	1/1	0/0	1/1	1/1	0/0	0/0	0/0	0/0	0/0	0/0	GCGGTCAGACCGGCCGTTACACTC|intron_variant|MODIFIER|OS01G0887400|OS01G0887400|transcript|OS01T0887400-01|protein_coding|2/5|c.436+508_436+509insGAGTGTAACGGCCGGTCTGACCG||||||
chr01	38559525	G	GGGGGAGCGCGCCAATGTGGCC	5134.37	0/0	0/0	0/0	0/0	0/0	0/0	0/0	0/0	0/0	0/0	1/1	0/0	0/0	0/0	1/1	0/0	1/1	1/1	0/0	0/0	0/0	0/0	0/0	0/0	GGGGGAGCGCGCCAATGTGGCC|upstream_gene_variant|MODIFIER|OS01G0887400|OS01G0887400|transcript|OS01T0887400-01|protein_coding||c.-1197_-1196insGGCCACATTGGCGCGCTCCCC|||||1161|,GGGGGAGCGCGCCAATGTGGCC|upstream_gene_variant|MODIFIER|EPlOSAG00000023508|EPlOSAG00000023508|transcript|EPlOSAT00000024896|lincRNA||n.-4181_-4180insGGGGAGCGCGCCAATGTGGCC|||||4180|,GGGGGAGCGCGCCAATGTGGCC|downstream_gene_variant|MO…
chr01	38561584	C	CATTGGTGTTGGTGTTGTTATCTTTCCCCTCTTTAGATATTTCATAGTAAATGAAGGTT	7593.37	0/0	0/0	0/0	0/0	0/0	0/0	0/0	0/0	0/0	0/0	1/1	0/0	0/0	0/0	1/1	0/0	1/1	1/1	0/0	0/0	0/0	0/0	0/0	0/0	CATTGGTGTTGGTGTTGTTATCTTTCCCCTCTTTAGATATTTCATAGTAAATGAAGGTT|upstream_gene_variant|MODIFIER|OS01G0887400|OS01G0887400|transcript|OS01T0887400-01|protein_coding||c.-3256_-3255insAACCTTCATTTACTATGAAATATCTAAAGAGGGGAAAGATAACAACACCAACACCAAT|||||3220|,CATTGGTGTTGGTGTTGTTATCTTTCCCCTCTTTAGATATTTCATAGTAAATGAAGGTT|upstream_gene_variant|MODIFIER|EPlOSAG00000023508|EPlOSAG00000023508|transcript|EPlOSAT0000002…
chr01	38562309	C	CATTAAAACTTTAGGGAGGCAAAACAAGTTGAGTGAAGTTTCGATCTCGATTCTACATG	18843.4	0/0	0/0	0/0	0/0	0/0	0/0	0/0	0/0	0/0	0/0	1|1	0/0	0/0	0/0	1|1	0/0	1|1	1|1	0/0	0/0	0/0	0/0	0/0	0/0	CATTAAAACTTTAGGGAGGCAAAACAAGTTGAGTGAAGTTTCGATCTCGATTCTACATG|upstream_gene_variant|MODIFIER|OS01G0887400|OS01G0887400|transcript|OS01T0887400-01|protein_coding||c.-3981_-3980insCATGTAGAATCGAGATCGAAACTTCACTCAACTTGTTTTGCCTCCCTAAAGTTTTAAT|||||3945|,CATTAAAACTTTAGGGAGGCAAAACAAGTTGAGTGAAGTTTCGATCTCGATTCTACATG|upstream_gene_variant|MODIFIER|EPlOSAG00000023508|EPlOSAG00000023508|transcript|EPlOSAT0000002…
chr01	38603222	T	TGGCCGGAAGGGGTCAACAGC	1832.13	0/0	0/0	0/0	0/0	0/0	0/0	0/0	0/0	0/0	0/0	./.	0/0	0/0	0/0	1|1	0/0	./.	./.	0/0	0/0	0/0	0/0	0/0	0/0	TGGCCGGAAGGGGTCAACAGC|upstream_gene_variant|MODIFIER|EPlOSAG00000002489|EPlOSAG00000002489|transcript|EPlOSAT00000003877|lincRNA||n.-3915_-3914insGGCCGGAAGGGGTCAACAGC|||||3914|,TGGCCGGAAGGGGTCAACAGC|intergenic_region|MODIFIER|OS01G0888200-EPlOSAG00000002489|OS01G0888200-EPlOSAG00000002489|intergenic_region|OS01G0888200-EPlOSAG00000002489|||n.38603222_38603223insGGCCGGAAGGGGTCAACAGC||||||
chr01	38603223	G	GGCCGGAAGGGGTCAACAGCGC	687.13	0/0	0/0	0/0	0/0	0/0	0/0	0/0	0/0	0/0	0/0	1|1	0/0	0/0	0/0	./.	0/0	./.	./.	0/0	0/0	0/0	0/0	0/0	0/0	GGCCGGAAGGGGTCAACAGCGC|upstream_gene_variant|MODIFIER|EPlOSAG00000002489|EPlOSAG00000002489|transcript|EPlOSAT00000003877|lincRNA||n.-3914_-3913insGCCGGAAGGGGTCAACAGCGC|||||3913|,GGCCGGAAGGGGTCAACAGCGC|intergenic_region|MODIFIER|OS01G0888200-EPlOSAG00000002489|OS01G0888200-EPlOSAG00000002489|intergenic_region|OS01G0888200-EPlOSAG00000002489|||n.38603223_38603224insGCCGGAAGGGGTCAACAGCGC||||||
chr01	38636908	A	AATATATATATATATATATAT	1127.17	0/0	./.	0/0	0/0	./.	0/0	0/0	0/0	0/0	./.	0/0	0/0	0/0	1/1	./.	0/0	0/0	0/0	0/0	0/0	0/0	0/0	0/0	./.	AATATATATATATATATATAT|upstream_gene_variant|MODIFIER|OS01G0888700|OS01G0888700|transcript|OS01T0888700-01|protein_coding||c.-1504_-1503insATATATATATATATATATAT|||||1338|,AATATATATATATATATATAT|upstream_gene_variant|MODIFIER|OS01G0888800|OS01G0888800|transcript|OS01T0888800-01|protein_coding||c.-616_-615insATATATATATATATATATAT|||||511|,AATATATATATATATATATAT|downstream_gene_variant|MODIFIER|OS01G0888…
chr01	38641851	T	TTTAAAAATATTTTGGCGAGAGAACTAAACAC	9575.37	0/0	0/0	0/0	0/0	0/0	0/0	0/0	0/0	0/0	0/0	1|1	0/0	0/0	0/0	1|1	0/0	1|1	1|1	0/0	0/0	0/0	0/0	0/0	0/0	TTTAAAAATATTTTGGCGAGAGAACTAAACAC|upstream_gene_variant|MODIFIER|EPlOSAG00000001090|EPlOSAG00000001090|transcript|EPlOSAT00000002478|lincRNA||n.-2638_-2637insTTAAAAATATTTTGGCGAGAGAACTAAACAC|||||2637|,TTTAAAAATATTTTGGCGAGAGAACTAAACAC|downstream_gene_variant|MODIFIER|OS01G0888800|OS01G0888800|transcript|OS01T0888800-01|protein_coding||c.*3884_*3885insTTAAAAATATTTTGGCGAGAGAACTAAACAC|||||3667|,TTTAAAA…
chr01	38644468	T	TTCCTTCGTTTTCTATTATAAAACTTTC	12153.4	0/0	0/0	0/0	0/0	0/0	0/0	0/0	0/0	0/0	0/0	1|1	0/0	0/0	0/0	1|1	0/0	1|1	1|1	0/0	0/0	0/0	0/0	0/0	0/0	TTCCTTCGTTTTCTATTATAAAACTTTC|upstream_gene_variant|MODIFIER|EPlOSAG00000001090|EPlOSAG00000001090|transcript|EPlOSAT00000002478|lincRNA||n.-21_-20insTCCTTCGTTTTCTATTATAAAACTTTC|||||20|,TTCCTTCGTTTTCTATTATAAAACTTTC|downstream_gene_variant|MODIFIER|EPlOSAG00000001060|EPlOSAG00000001060|transcript|EPlOSAT00000002448|lincRNA||n.*20_*21insGAAAGTTTTATAATAGAAAACGAAGGA|||||20|,TTCCTTCGTTTTCTATTATAAAACTTT…
chr01	38644471	G	GCATTACCAACATTCATATATATAGACATATATATTCCTTCC	12654.4	0/0	0/0	0/0	0/0	0/0	0/0	0/0	0/0	0/0	0/0	1|1	0/0	0/0	0/0	1|1	0/0	1|1	1|1	0/0	0/0	0/0	0/0	0/0	0/0	GCATTACCAACATTCATATATATAGACATATATATTCCTTCC|upstream_gene_variant|MODIFIER|EPlOSAG00000001090|EPlOSAG00000001090|transcript|EPlOSAT00000002478|lincRNA||n.-18_-17insCATTACCAACATTCATATATATAGACATATATATTCCTTCC|||||17|,GCATTACCAACATTCATATATATAGACATATATATTCCTTCC|downstream_gene_variant|MODIFIER|EPlOSAG00000001060|EPlOSAG00000001060|transcript|EPlOSAT00000002448|lincRNA||n.*17_*18insGGAAGGAATATATATGTCTAT…
chr01	38649654	TCACATAAAAAACCAACTTCTAGCTACGAAA	T	13942.3	0/0	0/0	0/0	0/0	0/0	0/0	0/0	0/0	0/0	0/0	1/1	0/0	0/0	0/0	1/1	0/0	1/1	1/1	0/0	0/0	0/0	0/0	0/0	0/0	T|upstream_gene_variant|MODIFIER|OS01G0888900|OS01G0888900|transcript|OS01T0888900-01|protein_coding||c.-3976_-3947delTTTCGTAGCTAGAAGTTGGTTTTTTATGTG|||||3898|,T|upstream_gene_variant|MODIFIER|OS01G0889000|OS01G0889000|transcript|OS01T0889000-01|protein_coding||c.-919_-890delCACATAAAAAACCAACTTCTAGCTACGAAA|||||872|,T|non_coding_transcript_exon_variant|MODIFIER|EPlOSAG00000038803|EPlOSAG00000038803|…
chr01	38659464	AGCTAAGTATTCATTTACTACAAGCAGCAAATCTTCTAAAGGCACACAATTTTACAACC	A	6083.33	0/0	0/0	0/0	0/0	0/0	0/0	0/0	0/0	0/0	0/0	1/1	0/0	0/0	0/0	1/1	0/0	1/1	1/1	0/0	0/0	0/0	0/0	0/0	0/0	A|3_prime_UTR_variant|MODIFIER|OS01G0889200|OS01G0889200|transcript|OS01T0889200-01|protein_coding|9/9|c.*627_*684delGGTTGTAAAATTGTGTGCCTTTAGAAGATTTGCTGCTTGTAGTAAATGAATACTTAGC|||||879|,A|upstream_gene_variant|MODIFIER|EPlOSAG00000033952|EPlOSAG00000033952|transcript|EPlOSAT00000035340|lincRNA||n.-1407_-1350delGCTAAGTATTCATTTACTACAAGCAGCAAATCTTCTAAAGGCACACAATTTTACAACC|||||1407|,A|downstream_gene_v…
chr01	38669611	CAGACTATAAGCCAGCTATATATATATTTTAAAT	C	6567.34	0/0	0/0	0/0	0/0	0/0	0/0	0/0	0/0	0/0	0/0	1/1	0/0	0/0	0/0	1/1	0/0	1/1	1/1	0/0	0/0	0/0	0/0	0/0	0/0	C|intergenic_region|MODIFIER|OS01G0889200-LBD6|OS01G0889200-OS01G0889400|intergenic_region|OS01G0889200-OS01G0889400|||n.38669612_38669644delAGACTATAAGCCAGCTATATATATATTTTAAAT||||||
chr01	38670335	ATGCTGACATGGATCTCTTGTAGAGATTCTAAT	A	7327.34	0/0	0/0	0/0	0/0	0/0	0/0	0/0	0/0	0/0	0/0	1|1	0/0	0/0	0/0	1|1	0/0	1|1	1|1	0/0	0/0	0/0	0/0	0/0	0/0	A|intergenic_region|MODIFIER|OS01G0889200-LBD6|OS01G0889200-OS01G0889400|intergenic_region|OS01G0889200-OS01G0889400|||n.38670336_38670367delTGCTGACATGGATCTCTTGTAGAGATTCTAAT||||||
chr01	38720493	T	TGGGGTTGGGAAACCATCCCCAGCCAGCTC	8721.79	0/0	0/0	0/0	0/0	0/0	0/0	0/0	0/0	0/0	0/0	1|1	0/0	0/0	0/0	1|1	0/0	./.	1|1	0/0	0/0	0/0	0/0	0/0	0/0	TGGGGTTGGGAAACCATCCCCAGCCAGCTC|upstream_gene_variant|MODIFIER|OS01G0890300|OS01G0890300|transcript|OS01T0890300-01|protein_coding||c.-3806_-3805insGAGCTGGCTGGGGATGGTTTCCCAACCCC|||||3738|,TGGGGTTGGGAAACCATCCCCAGCCAGCTC|downstream_gene_variant|MODIFIER|OS01G0890400|OS01G0890400|transcript|OS01T0890400-00|protein_coding||c.*1114_*1115insGGGGTTGGGAAACCATCCCCAGCCAGCTC|||||1115|,TGGGGTTGGGAAACCATCCCCAG…
chr01	38720551	G	GATCCATTAGCGCGTGATTAATATTT	8305.66	0/0	0/0	0/0	0/0	0/0	0/0	0/0	0/0	0/0	0/0	1|1	0/0	0/0	0/0	1|1	0/0	0/0	1|1	0/0	0/0	0/0	0/0	0/0	0/0	GATCCATTAGCGCGTGATTAATATTT|upstream_gene_variant|MODIFIER|OS01G0890300|OS01G0890300|transcript|OS01T0890300-01|protein_coding||c.-3864_-3863insAAATATTAATCACGCGCTAATGGAT|||||3796|,GATCCATTAGCGCGTGATTAATATTT|downstream_gene_variant|MODIFIER|OS01G0890400|OS01G0890400|transcript|OS01T0890400-00|protein_coding||c.*1172_*1173insATCCATTAGCGCGTGATTAATATTT|||||1173|,GATCCATTAGCGCGTGATTAATATTT|downstream_g…
chr01	38766435	GGAACCGGCGACCAAATTTCATTAAGATTTAACTTGAGGGAAGAAAAAACAAATACCTGGCTGAAA	G	9467.34	0/0	0/0	0/0	0/0	0/0	0/0	0/0	0/0	0/0	0/0	1/1	0/0	0/0	0/0	1/1	0/0	1/1	1/1	0/0	0/0	0/0	0/0	0/0	0/0	G|upstream_gene_variant|MODIFIER|EPlOSAG00000031136|EPlOSAG00000031136|transcript|EPlOSAT00000032524|lincRNA||n.-5034_-4970delTTTCAGCCAGGTATTTGTTTTTTCTTCCCTCAAGTTAAATCTTAATGAAATTTGGTCGCCGGTTC|||||4970|,G|upstream_gene_variant|MODIFIER|EPlOSAG00000034850|EPlOSAG00000034850|transcript|EPlOSAT00000036238|lincRNA||n.-3330_-3266delTTTCAGCCAGGTATTTGTTTTTTCTTCCCTCAAGTTAAATCTTAATGAAATTTGGTCGCCGGTTC|||||3…
chr01	38787106	CATATATATATATATATATATATATATATATATATATATATATATATATATATATATATATATAT	C,CATATATATATATATATATATATATATATATATATATATATATATAT	14839.5	2/2	0/0	0/0	0/0	./.	0/0	0/0	0/0	0/0	0/0	1|1	2/2	0/0	./.	1|1	0/0	1|1	1|1	0/0	0/0	0/0	./.	./.	0/0	C|intergenic_region|MODIFIER|EPlOSAG00000022377-EPlOSAG00000047507|EPlOSAG00000022377-EPlOSAG00000047507|intergenic_region|EPlOSAG00000022377-EPlOSAG00000047507|||n.38787107_38787170delATATATATATATATATATATATATATATATATATATATATATATATATATATATATATATATAT||||||,CATATATATATATATATATATATATATATATATATATATATATATAT|intergenic_region|MODIFIER|EPlOSAG00000022377-EPlOSAG00000047507|EPlOSAG00000022377-EPlOSAG0000…
chr01	38788366	GCGCCGCCGCCGCCGACCGGC	G	9215.33	0/0	0/0	0/0	0/0	0/0	0/0	0/0	0/0	0/0	0/0	1|1	0/0	0/0	0/0	1|1	0/0	1|1	1|1	0/0	0/0	0/0	0/0	0/0	0/0	G|intergenic_region|MODIFIER|EPlOSAG00000022377-EPlOSAG00000047507|EPlOSAG00000022377-EPlOSAG00000047507|intergenic_region|EPlOSAG00000022377-EPlOSAG00000047507|||n.38788367_38788386delCGCCGCCGCCGCCGACCGGC||||||
chr01	38794043	A	AGCCCATGCGAGATACGGAACGGCGCGGCGTTCTTCC	11323.4	0/0	0/0	0/0	0/0	0/0	0/0	0/0	0/0	0/0	0/0	1|1	0/0	0/0	0/0	1|1	0/0	1|1	1|1	0/0	0/0	0/0	0/0	0/0	0/0	AGCCCATGCGAGATACGGAACGGCGCGGCGTTCTTCC|upstream_gene_variant|MODIFIER|OS01G0892300|OS01G0892300|transcript|OS01T0892300-01|protein_coding||c.-1795_-1794insGCCCATGCGAGATACGGAACGGCGCGGCGTTCTTCC|||||1436|,AGCCCATGCGAGATACGGAACGGCGCGGCGTTCTTCC|downstream_gene_variant|MODIFIER|EPlOSAG00000047507|EPlOSAG00000047507|transcript|EPlOSAT00000048895|lincRNA||n.*57_*58insGGAAGAACGCCGCGCCGTTCCGTATCTCGCATGGGC||…
chr01	38799862	G	GAGATATATATATATATATATATATAT,GAGATATATATATATATATATATATATATAT	2417.84	0/0	0/0	0/0	0/0	0/0	0/0	0/0	0/0	0/0	0/0	./.	0/0	0/0	0/0	1|1	0/0	2|2	0/0	0/0	0/0	0/0	0/0	0/0	0/0	GAGATATATATATATATATATATATAT|upstream_gene_variant|MODIFIER|EPlOSAG00000014756|EPlOSAG00000014756|transcript|EPlOSAT00000016144|lincRNA||n.-2522_-2521insATATATATATATATATATATATATCT|||||2522|,GAGATATATATATATATATATATATATATAT|upstream_gene_variant|MODIFIER|EPlOSAG00000014756|EPlOSAG00000014756|transcript|EPlOSAT00000016144|lincRNA||n.-2522_-2521insATATATATATATATATATATATATATATCT|||||2522|,GAGATATATATAT…
chr01	38857821	G	GCGAGACAGCAGGCGAAGCTTCCGACCAAGGCCAAGAGAGTCACTGGCGACAGCAACATTGCAGT	645.12	0/0	0/0	0/0	0/0	0/0	0/0	0/0	0/0	0/0	0/0	1|1	0/0	0/0	0/0	./.	0/0	./.	./.	0/0	0/0	0/0	0/0	0/0	0/0	GCGAGACAGCAGGCGAAGCTTCCGACCAAGGCCAAGAGAGTCACTGGCGACAGCAACATTGCAGT|upstream_gene_variant|MODIFIER|EPlOSAG00000045877|EPlOSAG00000045877|transcript|EPlOSAT00000047265|lincRNA||n.-890_-889insCGAGACAGCAGGCGAAGCTTCCGACCAAGGCCAAGAGAGTCACTGGCGACAGCAACATTGCAGT|||||889|,GCGAGACAGCAGGCGAAGCTTCCGACCAAGGCCAAGAGAGTCACTGGCGACAGCAACATTGCAGT|downstream_gene_variant|MODIFIER|EPlOSAG00000045935|EPlOSAG00000045935|…
chr01	38860081	GGTGGCGGCGGCTCCTTTGGCA	G	10016.3	0/0	0/0	0/0	0/0	0/0	0/0	0/0	0/0	0/0	0/0	1|1	0/0	0/0	0/0	1|1	0/0	1|1	1|1	0/0	0/0	0/0	0/0	0/0	0/0	G|disruptive_inframe_deletion|MODERATE|OS01G0893700|OS01G0893700|transcript|OS01T0893700-00|protein_coding|1/2|c.113_133delTGCCAAAGGAGCCGCCGCCAC|p.Leu38_Pro44del|133/744|113/744|38/247||,G|upstream_gene_variant|MODIFIER|EPlOSAG00000045935|EPlOSAG00000045935|transcript|EPlOSAT00000047323|lincRNA||n.-1117_-1097delTGCCAAAGGAGCCGCCGCCAC|||||1097|,G|upstream_gene_variant|MODIFIER|OS01G0894000|OS01G089…
chr01	38862235	T	TAATACAAGTCAGTAAAGGGGCTCACATATCACATCCTCTCTCATTCTCTTCTTG	5723.37	0/0	0/0	0/0	0/0	0/0	0/0	0/0	0/0	0/0	0/0	1/1	0/0	0/0	0/0	1/1	0/0	1/1	1/1	0/0	0/0	0/0	0/0	0/0	0/0	TAATACAAGTCAGTAAAGGGGCTCACATATCACATCCTCTCTCATTCTCTTCTTG|upstream_gene_variant|MODIFIER|OS01G0893700|OS01G0893700|transcript|OS01T0893700-00|protein_coding||c.-2022_-2021insCAAGAAGAGAATGAGAGAGGATGTGATATGTGAGCCCCTTTACTGACTTGTATT|||||2022|,TAATACAAGTCAGTAAAGGGGCTCACATATCACATCCTCTCTCATTCTCTTCTTG|upstream_gene_variant|MODIFIER|EPlOSAG00000045935|EPlOSAG00000045935|transcript|EPlOSAT00000047323|lincRNA…
chr01	38863998	GTAAAATGACCCATCGTTTTGGAAGGCCAGCAATTTC	G	1949.22	0/0	0/0	0/0	0/0	0/0	0/0	0/0	0/0	0/0	0/0	1|1	0/0	0/0	0/0	1|1	0/0	1|1	1|1	0/0	0/0	0/0	0/0	0/0	0/0	G|5_prime_UTR_variant|MODIFIER|OS01G0894000|OS01G0894000|transcript|OS01T0894000-01|protein_coding|1/4|c.-68_-33delTAAAATGACCCATCGTTTTGGAAGGCCAGCAATTTC|||||33|,G|upstream_gene_variant|MODIFIER|OS01G0893700|OS01G0893700|transcript|OS01T0893700-00|protein_coding||c.-3820_-3785delGAAATTGCTGGCCTTCCAAAACGATGGGTCATTTTA|||||3785|,G|upstream_gene_variant|MODIFIER|OS01G0894000|OS01G0894000|transcript|OS01…
chr01	38879532	TAAATATGGGTTGAAAATTTTC	T	12293.3	0/0	0/0	0/0	0/0	0/0	0/0	0/0	0/0	0/0	0/0	1|1	0/0	0/0	0/0	1|1	0/0	1/1	1|1	0/0	0/0	0/0	0/0	0/0	0/0	T|intergenic_region|MODIFIER|OS01G0894100-FRK1|OS01G0894100-OS01G0894300|intergenic_region|OS01G0894100-OS01G0894300|||n.38879533_38879553delAAATATGGGTTGAAAATTTTC||||||
chr01	38879656	C	CAAATCTGGGTTGAAAGTTTTA	648.12	0/0	0/0	0/0	0/0	0/0	0/0	0/0	0/0	0/0	0/0	./.	0/0	0/0	0/0	./.	0/0	1/1	./.	0/0	0/0	0/0	0/0	0/0	0/0	CAAATCTGGGTTGAAAGTTTTA|intergenic_region|MODIFIER|OS01G0894100-FRK1|OS01G0894100-OS01G0894300|intergenic_region|OS01G0894100-OS01G0894300|||n.38879656_38879657insAAATCTGGGTTGAAAGTTTTA||||||
chr01	38894586	C	CTGTCTACTACTCCCTCCATTTCACAA	7592.37	0/0	0/0	0/0	0/0	0/0	0/0	0/0	0/0	0/0	0/0	1/1	0/0	0/0	0/0	1/1	0/0	1/1	1/1	0/0	0/0	0/0	0/0	0/0	0/0	CTGTCTACTACTCCCTCCATTTCACAA|5_prime_UTR_variant|MODIFIER|OS01G0894600|OS01G0894600|transcript|OS01T0894600-03|protein_coding|1/1|c.-544_-519dupTTGTGAAATGGAGGGAGTAGTAGACA|||||519|WARNING_TRANSCRIPT_NO_START_CODON,CTGTCTACTACTCCCTCCATTTCACAA|upstream_gene_variant|MODIFIER|EPlOSAG00000036460|EPlOSAG00000036460|transcript|EPlOSAT00000037848|lincRNA||n.-4_-3insTGTCTACTACTCCCTCCATTTCACAA|||||3|,CTGTCTA…
chr01	38909627	T	TCTCTGAAACTGAAACTGAAA	13243.4	0/0	0/0	0/0	0/0	0/0	0/0	0/0	0/0	0/0	0/0	1/1	0/0	0/0	0/0	1/1	0/0	1/1	1/1	0/0	0/0	0/0	0/0	0/0	0/0	TCTCTGAAACTGAAACTGAAA|5_prime_UTR_variant|MODIFIER|OS01G0895000|OS01G0895000|transcript|OS01T0895000-01|protein_coding|1/1|c.-30_-29insTTTCAGTTTCAGTTTCAGAG|||||30|,TCTCTGAAACTGAAACTGAAA|downstream_gene_variant|MODIFIER|OS01G0895100|OS01G0895100|transcript|OS01T0895100-01|protein_coding||c.*1656_*1657insTTTCAGTTTCAGTTTCAGAG|||||1385|,TCTCTGAAACTGAAACTGAAA|downstream_gene_variant|MODIFIER|OS01G0895…
chr01	38920480	TAAAGCATTTTGCATGAGCCTCGCAAAAAAA	T	10826.3	0/0	0/0	0/0	0/0	0/0	0/0	0/0	0/0	0/0	0/0	1/1	0/0	0/0	0/0	1/1	0/0	1/1	1/1	0/0	0/0	0/0	0/0	0/0	0/0	T|upstream_gene_variant|MODIFIER|OS01G0895100|OS01G0895100|transcript|OS01T0895100-01|protein_coding||c.-5150_-5121delTTTTTTTGCGAGGCTCATGCAAAATGCTTT|||||4989|,T|upstream_gene_variant|MODIFIER|OS01G0895300|OS01G0895300|transcript|OS01T0895300-01|protein_coding||c.-4452_-4423delAAAGCATTTTGCATGAGCCTCGCAAAAAAA|||||4452|WARNING_TRANSCRIPT_NO_START_CODON,T|downstream_gene_variant|MODIFIER|OS01G0895200|…
chr01	38922337	T	TCCTTTTTCTGGGACGTTTCGGACCAGTTCGTCAGTCACCGTCTAAATAGTTGGAAAGATTCAGAGCTGAGCTTGTGCGAGGCAC	17406.4	0/0	0/0	0/0	0/0	0/0	0/0	0/0	0/0	0/0	0/0	1/1	0/0	0/0	0/0	1/1	0/0	1/1	1/1	0/0	0/0	0/0	0/0	0/0	0/0	TCCTTTTTCTGGGACGTTTCGGACCAGTTCGTCAGTCACCGTCTAAATAGTTGGAAAGATTCAGAGCTGAGCTTGTGCGAGGCAC|upstream_gene_variant|MODIFIER|OS01G0895300|OS01G0895300|transcript|OS01T0895300-01|protein_coding||c.-2596_-2595insCCTTTTTCTGGGACGTTTCGGACCAGTTCGTCAGTCACCGTCTAAATAGTTGGAAAGATTCAGAGCTGAGCTTGTGCGAGGCAC|||||2595|WARNING_TRANSCRIPT_NO_START_CODON,TCCTTTTTCTGGGACGTTTCGGACCAGTTCGTCAGTCACCGTCTAAATAGTTGGAAAGATTCAGAGCTG…
chr01	38934222	GGGGCTTTTAACTATTTGCCACTTTTAGATTTGGCAAATAACTATTTGCCACATGTGGGTCCAGTGGCAAAAAGTTAATTGCCACATGCAAATGGTTAAATATCTCGAAATTGACA	G	6814.34	0/0	0/0	0/0	0/0	0/0	0/0	0/0	0/0	0/0	0/0	1/1	0/0	0/0	0/0	1/1	0/0	1/1	1/1	0/0	0/0	0/0	0/0	0/0	0/0	G|downstream_gene_variant|MODIFIER|OS01G0895500|OS01G0895500|transcript|OS01T0895500-01|protein_coding||c.*4396_*4510del|||||4215|,G|intron_variant|MODIFIER|OS01G0895600|OS01G0895600|transcript|OS01T0895600-01|protein_coding|1/12|c.109+253_109+367del||||||
chr01	38935680	C	CACATTGAATGTTTAGACACATACATG	648.12	0/0	0/0	0/0	0/0	0/0	0/0	0/0	0/0	0/0	0/0	1|1	0/0	0/0	0/0	./.	0/0	./.	./.	0/0	0/0	0/0	0/0	0/0	0/0	CACATTGAATGTTTAGACACATACATG|upstream_gene_variant|MODIFIER|OS01G0895600|OS01G0895600|transcript|OS01T0895600-01|protein_coding||c.-983_-982insCATGTATGTGTCTAAACATTCAATGT|||||929|,CACATTGAATGTTTAGACACATACATG|intergenic_region|MODIFIER|OS01G0895600-OS01G0896200|OS01G0895600-OS01G0896200|intergenic_region|OS01G0895600-OS01G0896200|||n.38935680_38935681insACATTGAATGTTTAGACACATACATG||||||
chr01	38951395	T	TTCTTCTTTTTTCTTTGCACTAAAGTTGTCA	9086.37	0/0	0/0	0/0	0/0	0/0	0/0	0/0	0/0	0/0	0/0	1/1	0/0	0/0	0/0	1/1	0/0	1/1	1/1	0/0	0/0	0/0	0/0	0/0	0/0	TTCTTCTTTTTTCTTTGCACTAAAGTTGTCA|upstream_gene_variant|MODIFIER|FSM|OS01G0896300|transcript|OS01T0896300-00|protein_coding||c.-2268_-2267insTCTTCTTTTTTCTTTGCACTAAAGTTGTCA|||||2267|,TTCTTCTTTTTTCTTTGCACTAAAGTTGTCA|downstream_gene_variant|MODIFIER|OS01G0896200|OS01G0896200|transcript|OS01T0896200-01|protein_coding||c.*1088_*1089insTCTTCTTTTTTCTTTGCACTAAAGTTGTCA|||||917|WARNING_TRANSCRIPT_NO_START_CO…
chr01	38960969	ATATACACTTTCTTAAATCTGTAGTTTCT	A	10697.3	0/0	0/0	0/0	0/0	0/0	0/0	0/0	0/0	0/0	0/0	1/1	0/0	0/0	0/0	1/1	0/0	1/1	1/1	0/0	0/0	0/0	0/0	0/0	0/0	A|upstream_gene_variant|MODIFIER|OS01G0896350|OS01G0896350|transcript|OS01T0896350-00|lincRNA||n.-2559_-2532delAGAAACTACAGATTTAAGAAAGTGTATA|||||2532|,A|upstream_gene_variant|MODIFIER|OS01G0896400|OS01G0896400|transcript|OS01T0896400-01|protein_coding||c.-873_-846delAGAAACTACAGATTTAAGAAAGTGTATA|||||735|,A|downstream_gene_variant|MODIFIER|FSM|OS01G0896300|transcript|OS01T0896300-00|protein_coding||…
chr01	38961192	A	AAAAAATGCTTCTGATGTGGAGCTT	2117.48	0/0	0/0	0/0	0/0	0/0	0/0	0/0	0/0	0/0	0/0	1|1	0/0	0/0	0/0	1|1	0/0	./.	./.	0/0	0/0	0/0	0/0	0/0	0/0	AAAAAATGCTTCTGATGTGGAGCTT|upstream_gene_variant|MODIFIER|OS01G0896350|OS01G0896350|transcript|OS01T0896350-00|lincRNA||n.-2755_-2754insAAGCTCCACATCAGAAGCATTTTT|||||2755|,AAAAAATGCTTCTGATGTGGAGCTT|upstream_gene_variant|MODIFIER|OS01G0896400|OS01G0896400|transcript|OS01T0896400-01|protein_coding||c.-1069_-1068insAAGCTCCACATCAGAAGCATTTTT|||||958|,AAAAAATGCTTCTGATGTGGAGCTT|downstream_gene_variant|MOD…
chr01	38974504	T	TTCAATATAATCCTTTCATGCGGCTCATG	639.12	0/0	0/0	0/0	0/0	0/0	0/0	0/0	0/0	0/0	0/0	./.	0/0	0/0	0/0	./.	0/0	1/1	./.	0/0	0/0	0/0	0/0	0/0	0/0	TTCAATATAATCCTTTCATGCGGCTCATG|splice_region_variant&intron_variant|LOW|OS01G0896800|OS01G0896800|transcript|OS01T0896800-01|protein_coding|2/8|c.163+6_163+7insTCAATATAATCCTTTCATGCGGCTCATG||||||WARNING_TRANSCRIPT_NO_START_CODON,TTCAATATAATCCTTTCATGCGGCTCATG|downstream_gene_variant|MODIFIER|RPL5B|OS01G0896700|transcript|OS01T0896700-00|protein_coding||c.*3676_*3677insTCAATATAATCCTTTCATGCGGCTCATG|||…
[truncated: 10,138 more rows]
