# Supplementary material for: Genomic Variation in Korean japonica Rice Varieties
Source: Genes (Basel). 2021 Oct 30;12(11):1749. doi: 10.3390/genes12111749 (PMC8623644; doi:10.3390/genes12111749)
Supplement: Supplementary file 1 [file genes-12-01749-s001.zip › TableS5_high_moderate_impact_variants.xlsx]

## Sheet: KJV24_variants.snpEff.varonly.h
Table S5. Information about Variants with High or Moderate Impact Effects on Gene Function
Chromosome	Position (bp)	Reference allele	Alternative allele	Quality	Genotype of varieties (0: reference allele, 1: the first alternative allele, 2: the second alternative allele, 3: the third alternative allele, etc.., /: not-phased genotype, |: phased genotype, ./.: missing genotype)																								Annotation
					Cheongho	Dami	Dongan	Dongjin	Giho	Haechanmulgyeol	Hiami	Hwacheong	Hwayeong	Ilpum	Jinbu43	Jopyeong	Joun	Junam	Nampyeong	Odae	Saeilmi	Saenuri	Samgwang	Seogan	Seomyeong	Sindongjin	Sobi	Unbong40
chr01	34057	C	T	3042.79	0/0	0/0	0/0	0/0	0/0	0/0	0/0	0/0	0/0	0/0	1/1	0/0	0/0	0/0	0/0	1/1	0/0	0/0	0/0	0/0	0/0	0/0	0/0	0/0	T|missense_variant|MODERATE|OS01G0100800|OS01G0100800|transcript|OS01T0100800-01|protein_coding|14/14|c.1004C>T|p.Thr335Ile|1126/1522|1004/1071|335/356||,T|upstream_gene_variant|MODIFIER|SPL|OS01G0100900|transcript|OS01T0100900-01|protein_coding||c.-1686C>T|||||1566|
chr01	209480	T	TGAAGAA	1111.83	0/0	0/0	0/0	0/0	0/0	0/0	0/0	0/0	0/0	0/0	1/1	0/0	0/0	0/0	0/0	1/1	0/0	0/0	0/0	0/0	0/0	0/0	0/0	0/0	TGAAGAA|conservative_inframe_insertion|MODERATE|OS01G0104000|OS01G0104000|transcript|OS01T0104000-01|protein_coding|1/4|c.40_45dupTTCTTC|p.Phe14_Phe15dup|126/2065|45/1668|15/555||,TGAAGAA|conservative_inframe_insertion|MODERATE|OS01G0104000|OS01G0104000|transcript|OS01T0104000-02|protein_coding|1/4|c.40_45dupTTCTTC|p.Phe14_Phe15dup|101/2040|45/1665|15/554||,TGAAGAA|upstream_gene_variant|MODIFIER|…
chr01	600441	A	T	6497.73	0/0	0/0	0/0	0/0	0/0	0/0	1/1	0/0	0/0	1/1	0/0	0/0	0/0	0/0	0/0	0/0	0/0	0/0	0/0	1/1	0/0	0/0	0/0	0/0	T|missense_variant|MODERATE|OS01G0111400|OS01G0111400|transcript|OS01T0111400-01|protein_coding|4/4|c.1342A>T|p.Thr448Ser|1543/2559|1342/2106|448/701||,T|3_prime_UTR_variant|MODIFIER|OS01G0111400|OS01G0111400|transcript|OS01T0111400-02|protein_coding|3/3|c.*203A>T|||||203|WARNING_TRANSCRIPT_NO_START_CODON
chr01	721561	C	T	7157.73	0/0	0/0	0/0	0/0	1/1	0/0	0/0	1/1	0/0	0/0	0/0	0/0	1/1	0/0	0/0	0/0	0/0	0/0	0/0	0/0	0/0	0/0	0/0	0/0	T|missense_variant|MODERATE|OS01G0113200|OS01G0113200|transcript|OS01T0113200-01|protein_coding|3/4|c.1135G>A|p.Val379Ile|1169/1944|1135/1197|379/398||,T|upstream_gene_variant|MODIFIER|EPlOSAG00000038600|EPlOSAG00000038600|transcript|EPlOSAT00000039988|lincRNA||n.-1093G>A|||||1093|,T|upstream_gene_variant|MODIFIER|EPlOSAG00000049783|EPlOSAG00000049783|transcript|EPlOSAT00000051171|lincRNA||n.-111…
chr01	724012	A	C	7069.73	0/0	0/0	0/0	0/0	1/1	0/0	0/0	1/1	0/0	0/0	0/0	0/0	1/1	0/0	0/0	0/0	0/0	0/0	0/0	0/0	0/0	0/0	0/0	0/0	C|missense_variant|MODERATE|OS01G0113300|OS01G0113300|transcript|OS01T0113300-01|protein_coding|1/3|c.269A>C|p.Lys90Thr|320/2245|269/1980|90/659||,C|3_prime_UTR_variant|MODIFIER|OS01G0113325|OS01G0113325|transcript|OS01T0113325-00|protein_coding|2/2|c.*1280T>G|||||1344|,C|upstream_gene_variant|MODIFIER|OS01G0113200|OS01G0113200|transcript|OS01T0113200-01|protein_coding||c.-729T>G|||||695|,C|upstr…
chr01	724562	A	C	6209.73	0/0	0/0	0/0	0/0	1/1	0/0	0/0	1/1	0/0	0/0	0/0	0/0	1/1	0/0	0/0	0/0	0/0	0/0	0/0	0/0	0/0	0/0	0/0	0/0	C|missense_variant|MODERATE|OS01G0113300|OS01G0113300|transcript|OS01T0113300-01|protein_coding|2/3|c.737A>C|p.Tyr246Ser|788/2245|737/1980|246/659||,C|3_prime_UTR_variant|MODIFIER|OS01G0113325|OS01G0113325|transcript|OS01T0113325-00|protein_coding|2/2|c.*730T>G|||||794|,C|upstream_gene_variant|MODIFIER|OS01G0113200|OS01G0113200|transcript|OS01T0113200-01|protein_coding||c.-1279T>G|||||1245|,C|non…
chr01	725632	T	C	7245.73	0/0	0/0	0/0	0/0	1/1	0/0	0/0	1/1	0/0	0/0	0/0	0/0	1/1	0/0	0/0	0/0	0/0	0/0	0/0	0/0	0/0	0/0	0/0	0/0	C|missense_variant|MODERATE|OS01G0113300|OS01G0113300|transcript|OS01T0113300-01|protein_coding|3/3|c.1727T>C|p.Val576Ala|1778/2245|1727/1980|576/659||,C|synonymous_variant|LOW|OS01G0113325|OS01G0113325|transcript|OS01T0113325-00|protein_coding|1/2|c.222A>G|p.Ser74Ser|254/2086|222/498|74/165||,C|downstream_gene_variant|MODIFIER|EPlOSAG00000050457|EPlOSAG00000050457|transcript|EPlOSAT00000051845|l…
chr01	725652	A	G	7067.73	0/0	0/0	0/0	0/0	1/1	0/0	0/0	1/1	0/0	0/0	0/0	0/0	1/1	0/0	0/0	0/0	0/0	0/0	0/0	0/0	0/0	0/0	0/0	0/0	G|missense_variant|MODERATE|OS01G0113300|OS01G0113300|transcript|OS01T0113300-01|protein_coding|3/3|c.1747A>G|p.Ile583Val|1798/2245|1747/1980|583/659||,G|missense_variant|MODERATE|OS01G0113325|OS01G0113325|transcript|OS01T0113325-00|protein_coding|1/2|c.202T>C|p.Tyr68His|234/2086|202/498|68/165||,G|downstream_gene_variant|MODIFIER|EPlOSAG00000050457|EPlOSAG00000050457|transcript|EPlOSAT0000005184…
chr01	729799	A	G	6643.73	0/0	0/0	0/0	0/0	1/1	0/0	0/0	1/1	0/0	0/0	0/0	0/0	1/1	0/0	0/0	0/0	0/0	0/0	0/0	0/0	0/0	0/0	0/0	0/0	G|missense_variant|MODERATE|OS01G0113350|OS01G0113350|transcript|OS01T0113350-00|protein_coding|1/1|c.832A>G|p.Ile278Val|832/2205|832/1959|278/652||,G|upstream_gene_variant|MODIFIER|OS01G0113450|OS01G0113450|transcript|OS01T0113450-00|protein_coding||c.-3485A>G|||||1690|,G|downstream_gene_variant|MODIFIER|EPlOSAG00000003682|EPlOSAG00000003682|transcript|EPlOSAT00000005070|lincRNA||n.*1269T>C|||||…
chr01	729812	T	C	6555.73	0/0	0/0	0/0	0/0	1/1	0/0	0/0	1/1	0/0	0/0	0/0	0/0	1/1	0/0	0/0	0/0	0/0	0/0	0/0	0/0	0/0	0/0	0/0	0/0	C|missense_variant|MODERATE|OS01G0113350|OS01G0113350|transcript|OS01T0113350-00|protein_coding|1/1|c.845T>C|p.Ile282Thr|845/2205|845/1959|282/652||,C|upstream_gene_variant|MODIFIER|OS01G0113450|OS01G0113450|transcript|OS01T0113450-00|protein_coding||c.-3472T>C|||||1677|,C|downstream_gene_variant|MODIFIER|EPlOSAG00000003682|EPlOSAG00000003682|transcript|EPlOSAT00000005070|lincRNA||n.*1256A>G|||||…
chr01	729843	G	T	7948.73	0/0	0/0	0/0	0/0	1|1	0/0	0/0	1|1	0/0	0/0	0/0	0/0	1|1	0/0	0/0	0/0	0/0	0/0	0/0	0/0	0/0	0/0	0/0	0/0	T|missense_variant|MODERATE|OS01G0113350|OS01G0113350|transcript|OS01T0113350-00|protein_coding|1/1|c.876G>T|p.Met292Ile|876/2205|876/1959|292/652||,T|upstream_gene_variant|MODIFIER|OS01G0113450|OS01G0113450|transcript|OS01T0113450-00|protein_coding||c.-3441G>T|||||1646|,T|downstream_gene_variant|MODIFIER|EPlOSAG00000003682|EPlOSAG00000003682|transcript|EPlOSAT00000005070|lincRNA||n.*1225C>A|||||…
chr01	729851	C	G	7863.73	0/0	0/0	0/0	0/0	1|1	0/0	0/0	1|1	0/0	0/0	0/0	0/0	1|1	0/0	0/0	0/0	0/0	0/0	0/0	0/0	0/0	0/0	0/0	0/0	G|missense_variant|MODERATE|OS01G0113350|OS01G0113350|transcript|OS01T0113350-00|protein_coding|1/1|c.884C>G|p.Thr295Ser|884/2205|884/1959|295/652||,G|upstream_gene_variant|MODIFIER|OS01G0113450|OS01G0113450|transcript|OS01T0113450-00|protein_coding||c.-3433C>G|||||1638|,G|downstream_gene_variant|MODIFIER|EPlOSAG00000003682|EPlOSAG00000003682|transcript|EPlOSAT00000005070|lincRNA||n.*1217G>C|||||…
chr01	729854	G	T	7872.73	0/0	0/0	0/0	0/0	1|1	0/0	0/0	1|1	0/0	0/0	0/0	0/0	1|1	0/0	0/0	0/0	0/0	0/0	0/0	0/0	0/0	0/0	0/0	0/0	T|missense_variant|MODERATE|OS01G0113350|OS01G0113350|transcript|OS01T0113350-00|protein_coding|1/1|c.887G>T|p.Ser296Ile|887/2205|887/1959|296/652||,T|upstream_gene_variant|MODIFIER|OS01G0113450|OS01G0113450|transcript|OS01T0113450-00|protein_coding||c.-3430G>T|||||1635|,T|downstream_gene_variant|MODIFIER|EPlOSAG00000003682|EPlOSAG00000003682|transcript|EPlOSAT00000005070|lincRNA||n.*1214C>A|||||…
chr01	729890	G	A	7375.73	0/0	0/0	0/0	0/0	1/1	0/0	0/0	1/1	0/0	0/0	0/0	0/0	1/1	0/0	0/0	0/0	0/0	0/0	0/0	0/0	0/0	0/0	0/0	0/0	A|missense_variant|MODERATE|OS01G0113350|OS01G0113350|transcript|OS01T0113350-00|protein_coding|1/1|c.923G>A|p.Arg308His|923/2205|923/1959|308/652||,A|upstream_gene_variant|MODIFIER|OS01G0113450|OS01G0113450|transcript|OS01T0113450-00|protein_coding||c.-3394G>A|||||1599|,A|downstream_gene_variant|MODIFIER|EPlOSAG00000003682|EPlOSAG00000003682|transcript|EPlOSAT00000005070|lincRNA||n.*1178C>T|||||…
chr01	729907	C	T	6405.73	0/0	0/0	0/0	0/0	1/1	0/0	0/0	1/1	0/0	0/0	0/0	0/0	1/1	0/0	0/0	0/0	0/0	0/0	0/0	0/0	0/0	0/0	0/0	0/0	T|missense_variant|MODERATE|OS01G0113350|OS01G0113350|transcript|OS01T0113350-00|protein_coding|1/1|c.940C>T|p.Leu314Phe|940/2205|940/1959|314/652||,T|upstream_gene_variant|MODIFIER|OS01G0113450|OS01G0113450|transcript|OS01T0113450-00|protein_coding||c.-3377C>T|||||1582|,T|downstream_gene_variant|MODIFIER|EPlOSAG00000003682|EPlOSAG00000003682|transcript|EPlOSAT00000005070|lincRNA||n.*1161G>A|||||…
chr01	730037	A	G	6315.73	0/0	0/0	0/0	0/0	1/1	0/0	0/0	1/1	0/0	0/0	0/0	0/0	1/1	0/0	0/0	0/0	0/0	0/0	0/0	0/0	0/0	0/0	0/0	0/0	G|missense_variant|MODERATE|OS01G0113350|OS01G0113350|transcript|OS01T0113350-00|protein_coding|1/1|c.1070A>G|p.Asp357Gly|1070/2205|1070/1959|357/652||,G|upstream_gene_variant|MODIFIER|OS01G0113450|OS01G0113450|transcript|OS01T0113450-00|protein_coding||c.-3247A>G|||||1452|,G|downstream_gene_variant|MODIFIER|EPlOSAG00000003682|EPlOSAG00000003682|transcript|EPlOSAT00000005070|lincRNA||n.*1031T>C||…
chr01	730070	A	G	6741.73	0/0	0/0	0/0	0/0	1/1	0/0	0/0	1/1	0/0	0/0	0/0	0/0	1/1	0/0	0/0	0/0	0/0	0/0	0/0	0/0	0/0	0/0	0/0	0/0	G|missense_variant|MODERATE|OS01G0113350|OS01G0113350|transcript|OS01T0113350-00|protein_coding|1/1|c.1103A>G|p.Asn368Ser|1103/2205|1103/1959|368/652||,G|upstream_gene_variant|MODIFIER|OS01G0113450|OS01G0113450|transcript|OS01T0113450-00|protein_coding||c.-3214A>G|||||1419|,G|downstream_gene_variant|MODIFIER|EPlOSAG00000003682|EPlOSAG00000003682|transcript|EPlOSAT00000005070|lincRNA||n.*998T>C|||…
chr01	730123	C	T	5915.73	0/0	0/0	0/0	0/0	1/1	0/0	0/0	1/1	0/0	0/0	0/0	0/0	1/1	0/0	0/0	0/0	0/0	0/0	0/0	0/0	0/0	0/0	0/0	0/0	T|missense_variant|MODERATE|OS01G0113350|OS01G0113350|transcript|OS01T0113350-00|protein_coding|1/1|c.1156C>T|p.His386Tyr|1156/2205|1156/1959|386/652||,T|upstream_gene_variant|MODIFIER|OS01G0113450|OS01G0113450|transcript|OS01T0113450-00|protein_coding||c.-3161C>T|||||1366|,T|downstream_gene_variant|MODIFIER|EPlOSAG00000003682|EPlOSAG00000003682|transcript|EPlOSAT00000005070|lincRNA||n.*945G>A|||…
chr01	730241	C	T	7902.74	0/0	0/0	0/0	0/0	1|1	0/0	0/0	1|1	0/0	0/0	0/0	0/0	1|1	0/0	0/0	0/0	0/0	0/0	0/0	0/0	0/0	0/0	0/0	0/0	T|missense_variant|MODERATE|OS01G0113350|OS01G0113350|transcript|OS01T0113350-00|protein_coding|1/1|c.1274C>T|p.Ala425Val|1274/2205|1274/1959|425/652||,T|upstream_gene_variant|MODIFIER|OS01G0113450|OS01G0113450|transcript|OS01T0113450-00|protein_coding||c.-3043C>T|||||1248|,T|downstream_gene_variant|MODIFIER|EPlOSAG00000003682|EPlOSAG00000003682|transcript|EPlOSAT00000005070|lincRNA||n.*827G>A|||…
chr01	730249	T	G	8407.75	0/0	0/0	0/0	0/0	1|1	0/0	0/0	1|1	0/0	0/0	0/0	0/0	1|1	0/0	0/0	0/0	0/0	0/0	0/0	0/0	0/0	0/0	0/0	0/0	G|missense_variant|MODERATE|OS01G0113350|OS01G0113350|transcript|OS01T0113350-00|protein_coding|1/1|c.1282T>G|p.Phe428Val|1282/2205|1282/1959|428/652||,G|upstream_gene_variant|MODIFIER|OS01G0113450|OS01G0113450|transcript|OS01T0113450-00|protein_coding||c.-3035T>G|||||1240|,G|downstream_gene_variant|MODIFIER|EPlOSAG00000003682|EPlOSAG00000003682|transcript|EPlOSAT00000005070|lincRNA||n.*819A>C|||…
chr01	730285	T	C	9017.73	0/0	0/0	0/0	0/0	1|1	0/0	0/0	1|1	0/0	0/0	0/0	0/0	1|1	0/0	0/0	0/0	0/0	0/0	0/0	0/0	0/0	0/0	0/0	0/0	C|missense_variant|MODERATE|OS01G0113350|OS01G0113350|transcript|OS01T0113350-00|protein_coding|1/1|c.1318T>C|p.Tyr440His|1318/2205|1318/1959|440/652||,C|upstream_gene_variant|MODIFIER|OS01G0113450|OS01G0113450|transcript|OS01T0113450-00|protein_coding||c.-2999T>C|||||1204|,C|downstream_gene_variant|MODIFIER|EPlOSAG00000003682|EPlOSAG00000003682|transcript|EPlOSAT00000005070|lincRNA||n.*783A>G|||…
chr01	730678	G	C	9729.73	0/0	0/0	0/0	0/0	1|1	0/0	0/0	1|1	0/0	0/0	0/0	0/0	1|1	0/0	0/0	0/0	0/0	0/0	0/0	0/0	0/0	0/0	0/0	0/0	C|missense_variant|MODERATE|OS01G0113350|OS01G0113350|transcript|OS01T0113350-00|protein_coding|1/1|c.1711G>C|p.Asp571His|1711/2205|1711/1959|571/652||,C|upstream_gene_variant|MODIFIER|OS01G0113450|OS01G0113450|transcript|OS01T0113450-00|protein_coding||c.-2606G>C|||||811|,C|downstream_gene_variant|MODIFIER|EPlOSAG00000003682|EPlOSAG00000003682|transcript|EPlOSAT00000005070|lincRNA||n.*390C>G||||…
chr01	730729	T	C	8611.73	0/0	0/0	0/0	0/0	1/1	0/0	0/0	1/1	0/0	0/0	0/0	0/0	1/1	0/0	0/0	0/0	0/0	0/0	0/0	0/0	0/0	0/0	0/0	0/0	C|missense_variant|MODERATE|OS01G0113350|OS01G0113350|transcript|OS01T0113350-00|protein_coding|1/1|c.1762T>C|p.Phe588Leu|1762/2205|1762/1959|588/652||,C|upstream_gene_variant|MODIFIER|OS01G0113450|OS01G0113450|transcript|OS01T0113450-00|protein_coding||c.-2555T>C|||||760|,C|downstream_gene_variant|MODIFIER|EPlOSAG00000003682|EPlOSAG00000003682|transcript|EPlOSAT00000005070|lincRNA||n.*339A>G||||…
chr01	730768	C	G	7622.73	0/0	0/0	0/0	0/0	1/1	0/0	0/0	1/1	0/0	0/0	0/0	0/0	1/1	0/0	0/0	0/0	0/0	0/0	0/0	0/0	0/0	0/0	0/0	0/0	G|missense_variant|MODERATE|OS01G0113350|OS01G0113350|transcript|OS01T0113350-00|protein_coding|1/1|c.1801C>G|p.Pro601Ala|1801/2205|1801/1959|601/652||,G|upstream_gene_variant|MODIFIER|OS01G0113450|OS01G0113450|transcript|OS01T0113450-00|protein_coding||c.-2516C>G|||||721|,G|downstream_gene_variant|MODIFIER|EPlOSAG00000003682|EPlOSAG00000003682|transcript|EPlOSAT00000005070|lincRNA||n.*300G>C||||…
chr01	731884	A	G	4832.73	0/0	0/0	0/0	0/0	1|1	0/0	0/0	1|1	0/0	0/0	0/0	0/0	1|1	0/0	0/0	0/0	0/0	0/0	0/0	0/0	0/0	0/0	0/0	0/0	G|missense_variant|MODERATE|OS01G0113400|OS01G0113400|transcript|OS01T0113400-01|protein_coding|6/6|c.1634T>C|p.Val545Ala|2081/2662|1634/2034|545/677||WARNING_TRANSCRIPT_NO_START_CODON,G|missense_variant|MODERATE|OS01G0113400|OS01G0113400|transcript|OS01T0113400-02|protein_coding|1/1|c.653T>C|p.Val218Ala|655/1389|653/1053|218/350||WARNING_TRANSCRIPT_NO_START_CODON,G|5_prime_UTR_variant|MODIFIER|O…
chr01	731956	T	A	3883.73	0/0	0/0	0/0	0/0	1|1	0/0	0/0	1|1	0/0	0/0	0/0	0/0	1|1	0/0	0/0	0/0	0/0	0/0	0/0	0/0	0/0	0/0	0/0	0/0	A|missense_variant|MODERATE|OS01G0113400|OS01G0113400|transcript|OS01T0113400-01|protein_coding|6/6|c.1562A>T|p.Tyr521Phe|2009/2662|1562/2034|521/677||WARNING_TRANSCRIPT_NO_START_CODON,A|missense_variant|MODERATE|OS01G0113400|OS01G0113400|transcript|OS01T0113400-02|protein_coding|1/1|c.581A>T|p.Tyr194Phe|583/1389|581/1053|194/350||WARNING_TRANSCRIPT_NO_START_CODON,A|5_prime_UTR_variant|MODIFIER|O…
chr01	731959	T	C	3929.73	0/0	0/0	0/0	0/0	1|1	0/0	0/0	1|1	0/0	0/0	0/0	0/0	1|1	0/0	0/0	0/0	0/0	0/0	0/0	0/0	0/0	0/0	0/0	0/0	C|missense_variant|MODERATE|OS01G0113400|OS01G0113400|transcript|OS01T0113400-01|protein_coding|6/6|c.1559A>G|p.Asn520Ser|2006/2662|1559/2034|520/677||WARNING_TRANSCRIPT_NO_START_CODON,C|missense_variant|MODERATE|OS01G0113400|OS01G0113400|transcript|OS01T0113400-02|protein_coding|1/1|c.578A>G|p.Asn193Ser|580/1389|578/1053|193/350||WARNING_TRANSCRIPT_NO_START_CODON,C|5_prime_UTR_premature_start_co…
chr01	732267	A	T	1129.36	0/0	0/0	0/0	0/0	./.	0/0	0/0	./.	0/0	0/0	0/0	0/0	1|1	0/0	0/0	0/0	0/0	0/0	0/0	0/0	0/0	0/0	0/0	0/0	T|missense_variant|MODERATE|OS01G0113400|OS01G0113400|transcript|OS01T0113400-01|protein_coding|6/6|c.1251T>A|p.Ser417Arg|1698/2662|1251/2034|417/677||WARNING_TRANSCRIPT_NO_START_CODON,T|missense_variant|MODERATE|OS01G0113400|OS01G0113400|transcript|OS01T0113400-02|protein_coding|1/1|c.270T>A|p.Ser90Arg|272/1389|270/1053|90/350||WARNING_TRANSCRIPT_NO_START_CODON,T|5_prime_UTR_variant|MODIFIER|OS0…
chr01	732313	T	C	1007.36	0/0	0/0	0/0	0/0	./.	0/0	0/0	./.	0/0	0/0	0/0	0/0	1|1	0/0	0/0	0/0	0/0	0/0	0/0	0/0	0/0	0/0	0/0	0/0	C|missense_variant|MODERATE|OS01G0113400|OS01G0113400|transcript|OS01T0113400-01|protein_coding|6/6|c.1205A>G|p.Asn402Ser|1652/2662|1205/2034|402/677||WARNING_TRANSCRIPT_NO_START_CODON,C|missense_variant|MODERATE|OS01G0113400|OS01G0113400|transcript|OS01T0113400-02|protein_coding|1/1|c.224A>G|p.Asn75Ser|226/1389|224/1053|75/350||WARNING_TRANSCRIPT_NO_START_CODON,C|5_prime_UTR_premature_start_codo…
chr01	732316	TAG	T	917.36	0/0	0/0	0/0	0/0	./.	0/0	0/0	./.	0/0	0/0	0/0	0/0	1|1	0/0	0/0	0/0	0/0	0/0	0/0	0/0	0/0	0/0	0/0	0/0	T|frameshift_variant|HIGH|OS01G0113400|OS01G0113400|transcript|OS01T0113400-01|protein_coding|6/6|c.1200_1201delCT|p.Asn400fs|1648/2662|1200/2034|400/677||WARNING_TRANSCRIPT_NO_START_CODON,T|frameshift_variant|HIGH|OS01G0113400|OS01G0113400|transcript|OS01T0113400-02|protein_coding|1/1|c.219_220delCT|p.Asn73fs|222/1389|219/1053|73/350||WARNING_TRANSCRIPT_NO_START_CODON,T|5_prime_UTR_variant|MODIF…
chr01	732320	T	G	916.06	0/0	0/0	0/0	0/0	0/0	0/0	0/0	0/0	0/0	0/0	0/0	0/0	1|1	0/0	0/0	0/0	0/0	0/0	0/0	0/0	0/0	0/0	0/0	0/0	G|missense_variant|MODERATE|OS01G0113400|OS01G0113400|transcript|OS01T0113400-01|protein_coding|6/6|c.1198A>C|p.Asn400His|1645/2662|1198/2034|400/677||WARNING_TRANSCRIPT_NO_START_CODON,G|missense_variant|MODERATE|OS01G0113400|OS01G0113400|transcript|OS01T0113400-02|protein_coding|1/1|c.217A>C|p.Asn73His|219/1389|217/1053|73/350||WARNING_TRANSCRIPT_NO_START_CODON,G|5_prime_UTR_variant|MODIFIER|OS0…
chr01	732323	CT	C	827.36	0/0	0/0	0/0	0/0	./.	0/0	0/0	./.	0/0	0/0	0/0	0/0	1|1	0/0	0/0	0/0	0/0	0/0	0/0	0/0	0/0	0/0	0/0	0/0	C|frameshift_variant|HIGH|OS01G0113400|OS01G0113400|transcript|OS01T0113400-01|protein_coding|6/6|c.1194delA|p.Asp399fs|1641/2662|1194/2034|398/677||WARNING_TRANSCRIPT_NO_START_CODON,C|frameshift_variant|HIGH|OS01G0113400|OS01G0113400|transcript|OS01T0113400-02|protein_coding|1/1|c.213delA|p.Asp72fs|215/1389|213/1053|71/350||WARNING_TRANSCRIPT_NO_START_CODON,C|5_prime_UTR_variant|MODIFIER|OS01G01…
chr01	732415	T	C	7053.73	0/0	0/0	0/0	0/0	1|1	0/0	0/0	1|1	0/0	0/0	0/0	0/0	1|1	0/0	0/0	0/0	0/0	0/0	0/0	0/0	0/0	0/0	0/0	0/0	C|missense_variant|MODERATE|OS01G0113400|OS01G0113400|transcript|OS01T0113400-01|protein_coding|6/6|c.1103A>G|p.His368Arg|1550/2662|1103/2034|368/677||WARNING_TRANSCRIPT_NO_START_CODON,C|missense_variant|MODERATE|OS01G0113400|OS01G0113400|transcript|OS01T0113400-02|protein_coding|1/1|c.122A>G|p.His41Arg|124/1389|122/1053|41/350||WARNING_TRANSCRIPT_NO_START_CODON,C|5_prime_UTR_variant|MODIFIER|OS0…
chr01	732418	C	T	6823.73	0/0	0/0	0/0	0/0	1|1	0/0	0/0	1|1	0/0	0/0	0/0	0/0	1|1	0/0	0/0	0/0	0/0	0/0	0/0	0/0	0/0	0/0	0/0	0/0	T|missense_variant|MODERATE|OS01G0113400|OS01G0113400|transcript|OS01T0113400-01|protein_coding|6/6|c.1100G>A|p.Ser367Asn|1547/2662|1100/2034|367/677||WARNING_TRANSCRIPT_NO_START_CODON,T|missense_variant|MODERATE|OS01G0113400|OS01G0113400|transcript|OS01T0113400-02|protein_coding|1/1|c.119G>A|p.Ser40Asn|121/1389|119/1053|40/350||WARNING_TRANSCRIPT_NO_START_CODON,T|5_prime_UTR_variant|MODIFIER|OS0…
chr01	732526	C	T	7522.73	0/0	0/0	0/0	0/0	1|1	0/0	0/0	1|1	0/0	0/0	0/0	0/0	1|1	0/0	0/0	0/0	0/0	0/0	0/0	0/0	0/0	0/0	0/0	0/0	T|missense_variant|MODERATE|OS01G0113400|OS01G0113400|transcript|OS01T0113400-01|protein_coding|6/6|c.992G>A|p.Arg331Lys|1439/2662|992/2034|331/677||WARNING_TRANSCRIPT_NO_START_CODON,T|missense_variant|MODERATE|OS01G0113400|OS01G0113400|transcript|OS01T0113400-02|protein_coding|1/1|c.11G>A|p.Arg4Lys|13/1389|11/1053|4/350||WARNING_TRANSCRIPT_NO_START_CODON,T|5_prime_UTR_variant|MODIFIER|OS01G01134…
chr01	732541	G	A	7503.73	0/0	0/0	0/0	0/0	1|1	0/0	0/0	1|1	0/0	0/0	0/0	0/0	1|1	0/0	0/0	0/0	0/0	0/0	0/0	0/0	0/0	0/0	0/0	0/0	A|missense_variant|MODERATE|OS01G0113400|OS01G0113400|transcript|OS01T0113400-01|protein_coding|6/6|c.977C>T|p.Thr326Ile|1424/2662|977/2034|326/677||WARNING_TRANSCRIPT_NO_START_CODON,A|5_prime_UTR_variant|MODIFIER|OS01G0113450|OS01G0113450|transcript|OS01T0113450-00|protein_coding|1/2|c.-563G>A|||||743|,A|upstream_gene_variant|MODIFIER|EPlOSAG00000003682|EPlOSAG00000003682|transcript|EPlOSAT00000…
chr01	732548	G	T	7188.73	0/0	0/0	0/0	0/0	1|1	0/0	0/0	1|1	0/0	0/0	0/0	0/0	1|1	0/0	0/0	0/0	0/0	0/0	0/0	0/0	0/0	0/0	0/0	0/0	T|missense_variant|MODERATE|OS01G0113400|OS01G0113400|transcript|OS01T0113400-01|protein_coding|6/6|c.970C>A|p.Leu324Ile|1417/2662|970/2034|324/677||WARNING_TRANSCRIPT_NO_START_CODON,T|5_prime_UTR_premature_start_codon_gain_variant|LOW|OS01G0113450|OS01G0113450|transcript|OS01T0113450-00|protein_coding|1/2|c.-556G>T||||||,T|5_prime_UTR_variant|MODIFIER|OS01G0113450|OS01G0113450|transcript|OS01T01…
chr01	732550	G	C	6956.73	0/0	0/0	0/0	0/0	1|1	0/0	0/0	1|1	0/0	0/0	0/0	0/0	1|1	0/0	0/0	0/0	0/0	0/0	0/0	0/0	0/0	0/0	0/0	0/0	C|missense_variant|MODERATE|OS01G0113400|OS01G0113400|transcript|OS01T0113400-01|protein_coding|6/6|c.968C>G|p.Ala323Gly|1415/2662|968/2034|323/677||WARNING_TRANSCRIPT_NO_START_CODON,C|5_prime_UTR_variant|MODIFIER|OS01G0113450|OS01G0113450|transcript|OS01T0113450-00|protein_coding|1/2|c.-554G>C|||||734|,C|upstream_gene_variant|MODIFIER|EPlOSAG00000003682|EPlOSAG00000003682|transcript|EPlOSAT00000…
chr01	733122	C	G	934.38	0/0	0/0	0/0	0/0	1|1	0/0	0/0	1|1	0/0	0/0	0/0	0/0	1|1	0/0	0/0	0/0	0/0	0/0	0/0	0/0	0/0	0/0	0/0	0/0	G|missense_variant|MODERATE|OS01G0113400|OS01G0113400|transcript|OS01T0113400-01|protein_coding|4/6|c.618G>C|p.Leu206Phe|1065/2662|618/2034|206/677||WARNING_TRANSCRIPT_NO_START_CODON,G|5_prime_UTR_premature_start_codon_gain_variant|LOW|OS01G0113450|OS01G0113450|transcript|OS01T0113450-00|protein_coding|2/2|c.-162C>G||||||,G|5_prime_UTR_variant|MODIFIER|OS01G0113450|OS01G0113450|transcript|OS01T01…
chr01	733125	C	A	1113.71	0/0	0/0	0/0	0/0	1|1	0/0	0/0	1|1	0/0	0/0	0/0	0/0	1|1	0/0	0/0	0/0	0/0	0/0	0/0	0/0	0/0	0/0	0/0	0/0	A|missense_variant|MODERATE|OS01G0113400|OS01G0113400|transcript|OS01T0113400-01|protein_coding|4/6|c.615G>T|p.Glu205Asp|1062/2662|615/2034|205/677||WARNING_TRANSCRIPT_NO_START_CODON,A|5_prime_UTR_variant|MODIFIER|OS01G0113450|OS01G0113450|transcript|OS01T0113450-00|protein_coding|2/2|c.-159C>A|||||159|,A|upstream_gene_variant|MODIFIER|EPlOSAG00000003682|EPlOSAG00000003682|transcript|EPlOSAT00000…
chr01	733127	C	T	1203.72	0/0	0/0	0/0	0/0	1|1	0/0	0/0	1|1	0/0	0/0	0/0	0/0	1|1	0/0	0/0	0/0	0/0	0/0	0/0	0/0	0/0	0/0	0/0	0/0	T|missense_variant|MODERATE|OS01G0113400|OS01G0113400|transcript|OS01T0113400-01|protein_coding|4/6|c.613G>A|p.Glu205Lys|1060/2662|613/2034|205/677||WARNING_TRANSCRIPT_NO_START_CODON,T|5_prime_UTR_variant|MODIFIER|OS01G0113450|OS01G0113450|transcript|OS01T0113450-00|protein_coding|2/2|c.-157C>T|||||157|,T|upstream_gene_variant|MODIFIER|EPlOSAG00000003682|EPlOSAG00000003682|transcript|EPlOSAT00000…
chr01	733129	G	A	1293.7	0/0	0/0	0/0	0/0	1|1	0/0	0/0	1|1	0/0	0/0	0/0	0/0	1|1	0/0	0/0	0/0	0/0	0/0	0/0	0/0	0/0	0/0	0/0	0/0	A|missense_variant|MODERATE|OS01G0113400|OS01G0113400|transcript|OS01T0113400-01|protein_coding|4/6|c.611C>T|p.Ala204Val|1058/2662|611/2034|204/677||WARNING_TRANSCRIPT_NO_START_CODON,A|5_prime_UTR_variant|MODIFIER|OS01G0113450|OS01G0113450|transcript|OS01T0113450-00|protein_coding|2/2|c.-155G>A|||||155|,A|upstream_gene_variant|MODIFIER|EPlOSAG00000003682|EPlOSAG00000003682|transcript|EPlOSAT00000…
chr01	733136	A	C	1743.73	0/0	0/0	0/0	0/0	1|1	0/0	0/0	1|1	0/0	0/0	0/0	0/0	1|1	0/0	0/0	0/0	0/0	0/0	0/0	0/0	0/0	0/0	0/0	0/0	C|missense_variant|MODERATE|OS01G0113400|OS01G0113400|transcript|OS01T0113400-01|protein_coding|4/6|c.604T>G|p.Tyr202Asp|1051/2662|604/2034|202/677||WARNING_TRANSCRIPT_NO_START_CODON,C|5_prime_UTR_variant|MODIFIER|OS01G0113450|OS01G0113450|transcript|OS01T0113450-00|protein_coding|2/2|c.-148A>C|||||148|,C|upstream_gene_variant|MODIFIER|EPlOSAG00000003682|EPlOSAG00000003682|transcript|EPlOSAT00000…
chr01	733137	TTG	T	1878.73	0/0	0/0	0/0	0/0	1|1	0/0	0/0	1|1	0/0	0/0	0/0	0/0	1|1	0/0	0/0	0/0	0/0	0/0	0/0	0/0	0/0	0/0	0/0	0/0	T|frameshift_variant|HIGH|OS01G0113400|OS01G0113400|transcript|OS01T0113400-01|protein_coding|4/6|c.601_602delCA|p.Gln201fs|1049/2662|601/2034|201/677||WARNING_TRANSCRIPT_NO_START_CODON,T|5_prime_UTR_variant|MODIFIER|OS01G0113450|OS01G0113450|transcript|OS01T0113450-00|protein_coding|2/2|c.-146_-145delTG|||||145|,T|upstream_gene_variant|MODIFIER|EPlOSAG00000003682|EPlOSAG00000003682|transcript|EP…
chr01	733140	G	GCA	1968.77	0/0	0/0	0/0	0/0	1|1	0/0	0/0	1|1	0/0	0/0	0/0	0/0	1|1	0/0	0/0	0/0	0/0	0/0	0/0	0/0	0/0	0/0	0/0	0/0	GCA|frameshift_variant|HIGH|OS01G0113400|OS01G0113400|transcript|OS01T0113400-01|protein_coding|4/6|c.599_600insTG|p.Gln201fs|1046/2662|599/2034|200/677||WARNING_TRANSCRIPT_NO_START_CODON,GCA|5_prime_UTR_variant|MODIFIER|OS01G0113450|OS01G0113450|transcript|OS01T0113450-00|protein_coding|2/2|c.-144_-143insCA|||||143|,GCA|upstream_gene_variant|MODIFIER|EPlOSAG00000003682|EPlOSAG00000003682|transcr…
chr01	733143	T	A	2238.73	0/0	0/0	0/0	0/0	1|1	0/0	0/0	1|1	0/0	0/0	0/0	0/0	1|1	0/0	0/0	0/0	0/0	0/0	0/0	0/0	0/0	0/0	0/0	0/0	A|missense_variant|MODERATE|OS01G0113400|OS01G0113400|transcript|OS01T0113400-01|protein_coding|4/6|c.597A>T|p.Lys199Asn|1044/2662|597/2034|199/677||WARNING_TRANSCRIPT_NO_START_CODON,A|5_prime_UTR_variant|MODIFIER|OS01G0113450|OS01G0113450|transcript|OS01T0113450-00|protein_coding|2/2|c.-141T>A|||||141|,A|upstream_gene_variant|MODIFIER|EPlOSAG00000003682|EPlOSAG00000003682|transcript|EPlOSAT00000…
chr01	733147	T	TCGG	2643.77	0/0	0/0	0/0	0/0	1|1	0/0	0/0	1|1	0/0	0/0	0/0	0/0	1|1	0/0	0/0	0/0	0/0	0/0	0/0	0/0	0/0	0/0	0/0	0/0	TCGG|conservative_inframe_insertion|MODERATE|OS01G0113400|OS01G0113400|transcript|OS01T0113400-01|protein_coding|4/6|c.592_593insCCG|p.Lys198delinsThrGlu|1039/2662|592/2034|198/677||WARNING_TRANSCRIPT_NO_START_CODON,TCGG|5_prime_UTR_variant|MODIFIER|OS01G0113450|OS01G0113450|transcript|OS01T0113450-00|protein_coding|2/2|c.-137_-136insCGG|||||136|,TCGG|upstream_gene_variant|MODIFIER|OS01G0113500|O…
chr01	733148	TA	T	2643.73	0/0	0/0	0/0	0/0	1|1	0/0	0/0	1|1	0/0	0/0	0/0	0/0	1|1	0/0	0/0	0/0	0/0	0/0	0/0	0/0	0/0	0/0	0/0	0/0	T|frameshift_variant|HIGH|OS01G0113400|OS01G0113400|transcript|OS01T0113400-01|protein_coding|4/6|c.591delT|p.Lys199fs|1038/2662|591/2034|197/677||WARNING_TRANSCRIPT_NO_START_CODON,T|5_prime_UTR_variant|MODIFIER|OS01G0113450|OS01G0113450|transcript|OS01T0113450-00|protein_coding|2/2|c.-135delA|||||135|,T|upstream_gene_variant|MODIFIER|OS01G0113500|OS01G0113500|transcript|OS01T0113500-01|protein_c…
chr01	733151	CA	C	2733.73	0/0	0/0	0/0	0/0	1|1	0/0	0/0	1|1	0/0	0/0	0/0	0/0	1|1	0/0	0/0	0/0	0/0	0/0	0/0	0/0	0/0	0/0	0/0	0/0	C|frameshift_variant|HIGH|OS01G0113400|OS01G0113400|transcript|OS01T0113400-01|protein_coding|4/6|c.588delT|p.Ser196fs|1035/2662|588/2034|196/677||WARNING_TRANSCRIPT_NO_START_CODON,C|5_prime_UTR_variant|MODIFIER|OS01G0113450|OS01G0113450|transcript|OS01T0113450-00|protein_coding|2/2|c.-132delA|||||132|,C|upstream_gene_variant|MODIFIER|OS01G0113500|OS01G0113500|transcript|OS01T0113500-01|protein_c…
chr01	733153	C	CTGT	2778.77	0/0	0/0	0/0	0/0	1|1	0/0	0/0	1|1	0/0	0/0	0/0	0/0	1|1	0/0	0/0	0/0	0/0	0/0	0/0	0/0	0/0	0/0	0/0	0/0	CTGT|conservative_inframe_insertion|MODERATE|OS01G0113400|OS01G0113400|transcript|OS01T0113400-01|protein_coding|4/6|c.586_587insACA|p.Ala195_Ser196insAsn|1033/2662|586/2034|196/677||WARNING_TRANSCRIPT_NO_START_CODON,CTGT|5_prime_UTR_variant|MODIFIER|OS01G0113450|OS01G0113450|transcript|OS01T0113450-00|protein_coding|2/2|c.-129_-128insTTG|||||128|INFO_REALIGN_3_PRIME,CTGT|upstream_gene_variant|MO…
chr01	733158	A	AT	2868.77	0/0	0/0	0/0	0/0	1|1	0/0	0/0	1|1	0/0	0/0	0/0	0/0	1|1	0/0	0/0	0/0	0/0	0/0	0/0	0/0	0/0	0/0	0/0	0/0	AT|frameshift_variant|HIGH|OS01G0113400|OS01G0113400|transcript|OS01T0113400-01|protein_coding|4/6|c.581_582insA|p.Ala195fs|1028/2662|581/2034|194/677||WARNING_TRANSCRIPT_NO_START_CODON,AT|5_prime_UTR_variant|MODIFIER|OS01G0113450|OS01G0113450|transcript|OS01T0113450-00|protein_coding|2/2|c.-126_-125insT|||||125|,AT|upstream_gene_variant|MODIFIER|OS01G0113500|OS01G0113500|transcript|OS01T0113500-…
chr01	733159	G	C	2913.73	0/0	0/0	0/0	0/0	1|1	0/0	0/0	1|1	0/0	0/0	0/0	0/0	1|1	0/0	0/0	0/0	0/0	0/0	0/0	0/0	0/0	0/0	0/0	0/0	C|missense_variant|MODERATE|OS01G0113400|OS01G0113400|transcript|OS01T0113400-01|protein_coding|4/6|c.581C>G|p.Pro194Arg|1028/2662|581/2034|194/677||WARNING_TRANSCRIPT_NO_START_CODON,C|5_prime_UTR_variant|MODIFIER|OS01G0113450|OS01G0113450|transcript|OS01T0113450-00|protein_coding|2/2|c.-125G>C|||||125|,C|upstream_gene_variant|MODIFIER|OS01G0113500|OS01G0113500|transcript|OS01T0113500-01|protein_…
chr01	733166	A	AGACC	3225.77	0/0	0/0	0/0	0/0	1|1	0/0	0/0	1|1	0/0	0/0	0/0	0/0	1|1	0/0	0/0	0/0	0/0	0/0	0/0	0/0	0/0	0/0	0/0	0/0	AGACC|frameshift_variant|HIGH|OS01G0113400|OS01G0113400|transcript|OS01T0113400-01|protein_coding|4/6|c.573_574insGGTC|p.Trp192fs|1020/2662|573/2034|191/677||WARNING_TRANSCRIPT_NO_START_CODON,AGACC|5_prime_UTR_variant|MODIFIER|OS01G0113450|OS01G0113450|transcript|OS01T0113450-00|protein_coding|2/2|c.-118_-117insGACC|||||117|,AGACC|upstream_gene_variant|MODIFIER|OS01G0113500|OS01G0113500|transcrip…
chr01	733375	C	T	275.57	0/0	0/0	0/0	0/0	./.	0/0	0/0	1|1	0/0	0/0	0/0	0/0	1|1	0/0	0/0	0/0	0/0	0/0	0/0	0/0	0/0	0/0	0/0	0/0	T|missense_variant|MODERATE|OS01G0113400|OS01G0113400|transcript|OS01T0113400-01|protein_coding|4/6|c.365G>A|p.Ser122Asn|812/2662|365/2034|122/677||WARNING_TRANSCRIPT_NO_START_CODON,T|missense_variant|MODERATE|OS01G0113450|OS01G0113450|transcript|OS01T0113450-00|protein_coding|2/2|c.92C>T|p.Ala31Val|1707/2051|92/273|31/90||,T|upstream_gene_variant|MODIFIER|OS01G0113500|OS01G0113500|transcript|OS0…
chr01	733376	T	G	112.8	0/0	0/0	0/0	0/0	./.	0/0	0/0	./.	0/0	0/0	0/0	0/0	1|1	0/0	0/0	0/0	0/0	0/0	0/0	0/0	0/0	0/0	0/0	0/0	G|missense_variant|MODERATE|OS01G0113400|OS01G0113400|transcript|OS01T0113400-01|protein_coding|4/6|c.364A>C|p.Ser122Arg|811/2662|364/2034|122/677||WARNING_TRANSCRIPT_NO_START_CODON,G|synonymous_variant|LOW|OS01G0113450|OS01G0113450|transcript|OS01T0113450-00|protein_coding|2/2|c.93T>G|p.Ala31Ala|1708/2051|93/273|31/90||,G|upstream_gene_variant|MODIFIER|OS01G0113500|OS01G0113500|transcript|OS01T0…
chr01	733483	T	G	2728.73	0/0	0/0	0/0	0/0	1|1	0/0	0/0	1|1	0/0	0/0	0/0	0/0	1|1	0/0	0/0	0/0	0/0	0/0	0/0	0/0	0/0	0/0	0/0	0/0	G|missense_variant|MODERATE|OS01G0113400|OS01G0113400|transcript|OS01T0113400-01|protein_coding|4/6|c.257A>C|p.Asn86Thr|704/2662|257/2034|86/677||WARNING_TRANSCRIPT_NO_START_CODON,G|missense_variant|MODERATE|OS01G0113450|OS01G0113450|transcript|OS01T0113450-00|protein_coding|2/2|c.200T>G|p.Val67Gly|1815/2051|200/273|67/90||,G|upstream_gene_variant|MODIFIER|OS01G0113500|OS01G0113500|transcript|OS0…
chr01	733500	G	C	3810.73	0/0	0/0	0/0	0/0	1|1	0/0	0/0	1|1	0/0	0/0	0/0	0/0	1|1	0/0	0/0	0/0	0/0	0/0	0/0	0/0	0/0	0/0	0/0	0/0	C|missense_variant|MODERATE|OS01G0113450|OS01G0113450|transcript|OS01T0113450-00|protein_coding|2/2|c.217G>C|p.Asp73His|1832/2051|217/273|73/90||,C|synonymous_variant|LOW|OS01G0113400|OS01G0113400|transcript|OS01T0113400-01|protein_coding|4/6|c.240C>G|p.Val80Val|687/2662|240/2034|80/677||WARNING_TRANSCRIPT_NO_START_CODON,C|upstream_gene_variant|MODIFIER|OS01G0113500|OS01G0113500|transcript|OS01T0…
chr01	733510	G	T	4308.73	0/0	0/0	0/0	0/0	1|1	0/0	0/0	1|1	0/0	0/0	0/0	0/0	1|1	0/0	0/0	0/0	0/0	0/0	0/0	0/0	0/0	0/0	0/0	0/0	T|missense_variant|MODERATE|OS01G0113400|OS01G0113400|transcript|OS01T0113400-01|protein_coding|4/6|c.230C>A|p.Thr77Lys|677/2662|230/2034|77/677||WARNING_TRANSCRIPT_NO_START_CODON,T|missense_variant|MODERATE|OS01G0113450|OS01G0113450|transcript|OS01T0113450-00|protein_coding|2/2|c.227G>T|p.Cys76Phe|1842/2051|227/273|76/90||,T|upstream_gene_variant|MODIFIER|OS01G0113500|OS01G0113500|transcript|OS0…
chr01	733514	C	T	4578.73	0/0	0/0	0/0	0/0	1|1	0/0	0/0	1|1	0/0	0/0	0/0	0/0	1|1	0/0	0/0	0/0	0/0	0/0	0/0	0/0	0/0	0/0	0/0	0/0	T|missense_variant|MODERATE|OS01G0113400|OS01G0113400|transcript|OS01T0113400-01|protein_coding|4/6|c.226G>A|p.Gly76Arg|673/2662|226/2034|76/677||WARNING_TRANSCRIPT_NO_START_CODON,T|synonymous_variant|LOW|OS01G0113450|OS01G0113450|transcript|OS01T0113450-00|protein_coding|2/2|c.231C>T|p.Ser77Ser|1846/2051|231/273|77/90||,T|upstream_gene_variant|MODIFIER|OS01G0113500|OS01G0113500|transcript|OS01T0…
chr01	733516	G	T	4689.73	0/0	0/0	0/0	0/0	1|1	0/0	0/0	1|1	0/0	0/0	0/0	0/0	1|1	0/0	0/0	0/0	0/0	0/0	0/0	0/0	0/0	0/0	0/0	0/0	T|missense_variant|MODERATE|OS01G0113400|OS01G0113400|transcript|OS01T0113400-01|protein_coding|4/6|c.224C>A|p.Thr75Lys|671/2662|224/2034|75/677||WARNING_TRANSCRIPT_NO_START_CODON,T|missense_variant|MODERATE|OS01G0113450|OS01G0113450|transcript|OS01T0113450-00|protein_coding|2/2|c.233G>T|p.Cys78Phe|1848/2051|233/273|78/90||,T|upstream_gene_variant|MODIFIER|OS01G0113500|OS01G0113500|transcript|OS0…
chr01	733518	A	G	4689.73	0/0	0/0	0/0	0/0	1|1	0/0	0/0	1|1	0/0	0/0	0/0	0/0	1|1	0/0	0/0	0/0	0/0	0/0	0/0	0/0	0/0	0/0	0/0	0/0	G|missense_variant|MODERATE|OS01G0113450|OS01G0113450|transcript|OS01T0113450-00|protein_coding|2/2|c.235A>G|p.Ile79Val|1850/2051|235/273|79/90||,G|synonymous_variant|LOW|OS01G0113400|OS01G0113400|transcript|OS01T0113400-01|protein_coding|4/6|c.222T>C|p.Asn74Asn|669/2662|222/2034|74/677||WARNING_TRANSCRIPT_NO_START_CODON,G|upstream_gene_variant|MODIFIER|OS01G0113500|OS01G0113500|transcript|OS01T0…
chr01	733541	C	T	6196.73	0/0	0/0	0/0	0/0	1|1	0/0	0/0	1|1	0/0	0/0	0/0	0/0	1|1	0/0	0/0	0/0	0/0	0/0	0/0	0/0	0/0	0/0	0/0	0/0	T|missense_variant|MODERATE|OS01G0113400|OS01G0113400|transcript|OS01T0113400-01|protein_coding|4/6|c.199G>A|p.Gly67Ser|646/2662|199/2034|67/677||WARNING_TRANSCRIPT_NO_START_CODON,T|synonymous_variant|LOW|OS01G0113450|OS01G0113450|transcript|OS01T0113450-00|protein_coding|2/2|c.258C>T|p.Ala86Ala|1873/2051|258/273|86/90||,T|upstream_gene_variant|MODIFIER|OS01G0113500|OS01G0113500|transcript|OS01T0…
chr01	733551	C	A	6097.73	0/0	0/0	0/0	0/0	1|1	0/0	0/0	1|1	0/0	0/0	0/0	0/0	1|1	0/0	0/0	0/0	0/0	0/0	0/0	0/0	0/0	0/0	0/0	0/0	A|missense_variant|MODERATE|OS01G0113400|OS01G0113400|transcript|OS01T0113400-01|protein_coding|4/6|c.189G>T|p.Glu63Asp|636/2662|189/2034|63/677||WARNING_TRANSCRIPT_NO_START_CODON,A|missense_variant|MODERATE|OS01G0113450|OS01G0113450|transcript|OS01T0113450-00|protein_coding|2/2|c.268C>A|p.Leu90Ile|1883/2051|268/273|90/90||,A|upstream_gene_variant|MODIFIER|OS01G0113500|OS01G0113500|transcript|OS0…
chr01	733586	G	A	4663.73	0/0	0/0	0/0	0/0	1|1	0/0	0/0	1|1	0/0	0/0	0/0	0/0	1|1	0/0	0/0	0/0	0/0	0/0	0/0	0/0	0/0	0/0	0/0	0/0	A|missense_variant|MODERATE|OS01G0113400|OS01G0113400|transcript|OS01T0113400-01|protein_coding|4/6|c.154C>T|p.Pro52Ser|601/2662|154/2034|52/677||WARNING_TRANSCRIPT_NO_START_CODON,A|3_prime_UTR_variant|MODIFIER|OS01G0113450|OS01G0113450|transcript|OS01T0113450-00|protein_coding|2/2|c.*30G>A|||||30|,A|upstream_gene_variant|MODIFIER|OS01G0113500|OS01G0113500|transcript|OS01T0113500-01|protein_codin…
chr01	734781	C	T	2058.7	0/0	0/0	0/0	0/0	1|1	0/0	0/0	1|1	0/0	0/0	0/0	0/0	1|1	0/0	0/0	0/0	0/0	0/0	0/0	0/0	0/0	0/0	0/0	0/0	T|missense_variant|MODERATE|OS01G0113500|OS01G0113500|transcript|OS01T0113500-01|protein_coding|1/3|c.538C>T|p.His180Tyr|711/2542|538/1911|180/636||,T|downstream_gene_variant|MODIFIER|OS01G0113450|OS01G0113450|transcript|OS01T0113450-00|protein_coding||c.*1225C>T|||||1062|,T|intron_variant|MODIFIER|OS01G0113400|OS01G0113400|transcript|OS01T0113400-01|protein_coding|3/5|c.59-1100G>A||||||WARNING_T…
chr01	734799	G	T	3003.73	0/0	0/0	0/0	0/0	1|1	0/0	0/0	1|1	0/0	0/0	0/0	0/0	1|1	0/0	0/0	0/0	0/0	0/0	0/0	0/0	0/0	0/0	0/0	0/0	T|missense_variant|MODERATE|OS01G0113500|OS01G0113500|transcript|OS01T0113500-01|protein_coding|1/3|c.556G>T|p.Asp186Tyr|729/2542|556/1911|186/636||,T|downstream_gene_variant|MODIFIER|OS01G0113450|OS01G0113450|transcript|OS01T0113450-00|protein_coding||c.*1243G>T|||||1080|,T|intron_variant|MODIFIER|OS01G0113400|OS01G0113400|transcript|OS01T0113400-01|protein_coding|3/5|c.59-1118C>A||||||WARNING_T…
chr01	734800	A	C	3093.73	0/0	0/0	0/0	0/0	1|1	0/0	0/0	1|1	0/0	0/0	0/0	0/0	1|1	0/0	0/0	0/0	0/0	0/0	0/0	0/0	0/0	0/0	0/0	0/0	C|missense_variant|MODERATE|OS01G0113500|OS01G0113500|transcript|OS01T0113500-01|protein_coding|1/3|c.557A>C|p.Asp186Ala|730/2542|557/1911|186/636||,C|downstream_gene_variant|MODIFIER|OS01G0113450|OS01G0113450|transcript|OS01T0113450-00|protein_coding||c.*1244A>C|||||1081|,C|intron_variant|MODIFIER|OS01G0113400|OS01G0113400|transcript|OS01T0113400-01|protein_coding|3/5|c.59-1119T>G||||||WARNING_T…
chr01	734802	G	A	3183.73	0/0	0/0	0/0	0/0	1|1	0/0	0/0	1|1	0/0	0/0	0/0	0/0	1|1	0/0	0/0	0/0	0/0	0/0	0/0	0/0	0/0	0/0	0/0	0/0	A|missense_variant|MODERATE|OS01G0113500|OS01G0113500|transcript|OS01T0113500-01|protein_coding|1/3|c.559G>A|p.Ala187Thr|732/2542|559/1911|187/636||,A|downstream_gene_variant|MODIFIER|OS01G0113450|OS01G0113450|transcript|OS01T0113450-00|protein_coding||c.*1246G>A|||||1083|,A|intron_variant|MODIFIER|OS01G0113400|OS01G0113400|transcript|OS01T0113400-01|protein_coding|3/5|c.59-1121C>T||||||WARNING_T…
chr01	734804	TTA	T	3363.73	0/0	0/0	0/0	0/0	1|1	0/0	0/0	1|1	0/0	0/0	0/0	0/0	1|1	0/0	0/0	0/0	0/0	0/0	0/0	0/0	0/0	0/0	0/0	0/0	T|frameshift_variant|HIGH|OS01G0113500|OS01G0113500|transcript|OS01T0113500-01|protein_coding|1/3|c.563_564delAT|p.Tyr188fs|736/2542|563/1911|188/636||INFO_REALIGN_3_PRIME,T|downstream_gene_variant|MODIFIER|OS01G0113450|OS01G0113450|transcript|OS01T0113450-00|protein_coding||c.*1249_*1250delTA|||||1086|,T|intron_variant|MODIFIER|OS01G0113400|OS01G0113400|transcript|OS01T0113400-01|protein_coding|…
chr01	734808	G	GGCT	3543.77	0/0	0/0	0/0	0/0	1|1	0/0	0/0	1|1	0/0	0/0	0/0	0/0	1|1	0/0	0/0	0/0	0/0	0/0	0/0	0/0	0/0	0/0	0/0	0/0	GGCT|stop_gained&disruptive_inframe_insertion|HIGH|OS01G0113500|OS01G0113500|transcript|OS01T0113500-01|protein_coding|1/3|c.565_566insGCT|p.Glu189delinsGlyTer|739/2542|566/1911|189/636||,GGCT|downstream_gene_variant|MODIFIER|OS01G0113450|OS01G0113450|transcript|OS01T0113450-00|protein_coding||c.*1252_*1253insGCT|||||1090|,GGCT|intron_variant|MODIFIER|OS01G0113400|OS01G0113400|transcript|OS01T011…
chr01	734810	AG	A	3543.73	0/0	0/0	0/0	0/0	1|1	0/0	0/0	1|1	0/0	0/0	0/0	0/0	1|1	0/0	0/0	0/0	0/0	0/0	0/0	0/0	0/0	0/0	0/0	0/0	A|frameshift_variant|HIGH|OS01G0113500|OS01G0113500|transcript|OS01T0113500-01|protein_coding|1/3|c.568delG|p.Asp190fs|741/2542|568/1911|190/636||,A|downstream_gene_variant|MODIFIER|OS01G0113450|OS01G0113450|transcript|OS01T0113450-00|protein_coding||c.*1255delG|||||1092|,A|intron_variant|MODIFIER|OS01G0113400|OS01G0113400|transcript|OS01T0113400-01|protein_coding|3/5|c.59-1130delC||||||WARNING_T…
chr01	734854	G	A	4707.73	0/0	0/0	0/0	0/0	1|1	0/0	0/0	1|1	0/0	0/0	0/0	0/0	1|1	0/0	0/0	0/0	0/0	0/0	0/0	0/0	0/0	0/0	0/0	0/0	A|missense_variant|MODERATE|OS01G0113500|OS01G0113500|transcript|OS01T0113500-01|protein_coding|1/3|c.611G>A|p.Gly204Asp|784/2542|611/1911|204/636||,A|downstream_gene_variant|MODIFIER|OS01G0113450|OS01G0113450|transcript|OS01T0113450-00|protein_coding||c.*1298G>A|||||1135|,A|intron_variant|MODIFIER|OS01G0113400|OS01G0113400|transcript|OS01T0113400-01|protein_coding|3/5|c.59-1173C>T||||||WARNING_T…
chr01	734856	A	G	4668.73	0/0	0/0	0/0	0/0	1|1	0/0	0/0	1|1	0/0	0/0	0/0	0/0	1|1	0/0	0/0	0/0	0/0	0/0	0/0	0/0	0/0	0/0	0/0	0/0	G|missense_variant|MODERATE|OS01G0113500|OS01G0113500|transcript|OS01T0113500-01|protein_coding|1/3|c.613A>G|p.Ile205Val|786/2542|613/1911|205/636||,G|downstream_gene_variant|MODIFIER|OS01G0113450|OS01G0113450|transcript|OS01T0113450-00|protein_coding||c.*1300A>G|||||1137|,G|intron_variant|MODIFIER|OS01G0113400|OS01G0113400|transcript|OS01T0113400-01|protein_coding|3/5|c.59-1175T>C||||||WARNING_T…
chr01	734859	G	A	4578.73	0/0	0/0	0/0	0/0	1|1	0/0	0/0	1|1	0/0	0/0	0/0	0/0	1|1	0/0	0/0	0/0	0/0	0/0	0/0	0/0	0/0	0/0	0/0	0/0	A|missense_variant|MODERATE|OS01G0113500|OS01G0113500|transcript|OS01T0113500-01|protein_coding|1/3|c.616G>A|p.Val206Ile|789/2542|616/1911|206/636||,A|downstream_gene_variant|MODIFIER|OS01G0113450|OS01G0113450|transcript|OS01T0113450-00|protein_coding||c.*1303G>A|||||1140|,A|intron_variant|MODIFIER|OS01G0113400|OS01G0113400|transcript|OS01T0113400-01|protein_coding|3/5|c.59-1178C>T||||||WARNING_T…
chr01	734868	T	C	3948.73	0/0	0/0	0/0	0/0	1|1	0/0	0/0	1|1	0/0	0/0	0/0	0/0	1|1	0/0	0/0	0/0	0/0	0/0	0/0	0/0	0/0	0/0	0/0	0/0	C|missense_variant|MODERATE|OS01G0113500|OS01G0113500|transcript|OS01T0113500-01|protein_coding|1/3|c.625T>C|p.Ser209Pro|798/2542|625/1911|209/636||,C|downstream_gene_variant|MODIFIER|OS01G0113450|OS01G0113450|transcript|OS01T0113450-00|protein_coding||c.*1312T>C|||||1149|,C|intron_variant|MODIFIER|OS01G0113400|OS01G0113400|transcript|OS01T0113400-01|protein_coding|3/5|c.59-1187A>G||||||WARNING_T…
chr01	734870	CGGT	C	3813.73	0/0	0/0	0/0	0/0	1|1	0/0	0/0	1|1	0/0	0/0	0/0	0/0	1|1	0/0	0/0	0/0	0/0	0/0	0/0	0/0	0/0	0/0	0/0	0/0	C|disruptive_inframe_deletion|MODERATE|OS01G0113500|OS01G0113500|transcript|OS01T0113500-01|protein_coding|1/3|c.629_631delGTG|p.Gly210del|802/2542|629/1911|210/636||INFO_REALIGN_3_PRIME,C|downstream_gene_variant|MODIFIER|OS01G0113450|OS01G0113450|transcript|OS01T0113450-00|protein_coding||c.*1315_*1317delGGT|||||1152|,C|intron_variant|MODIFIER|OS01G0113400|OS01G0113400|transcript|OS01T0113400-01…
chr01	734875	C	A	3678.73	0/0	0/0	0/0	0/0	1|1	0/0	0/0	1|1	0/0	0/0	0/0	0/0	1|1	0/0	0/0	0/0	0/0	0/0	0/0	0/0	0/0	0/0	0/0	0/0	A|missense_variant|MODERATE|OS01G0113500|OS01G0113500|transcript|OS01T0113500-01|protein_coding|1/3|c.632C>A|p.Ala211Glu|805/2542|632/1911|211/636||,A|downstream_gene_variant|MODIFIER|OS01G0113450|OS01G0113450|transcript|OS01T0113450-00|protein_coding||c.*1319C>A|||||1156|,A|intron_variant|MODIFIER|OS01G0113400|OS01G0113400|transcript|OS01T0113400-01|protein_coding|3/5|c.59-1194G>T||||||WARNING_T…
chr01	734877	G	GGA	3543.77	0/0	0/0	0/0	0/0	1|1	0/0	0/0	1|1	0/0	0/0	0/0	0/0	1|1	0/0	0/0	0/0	0/0	0/0	0/0	0/0	0/0	0/0	0/0	0/0	GGA|frameshift_variant|HIGH|OS01G0113500|OS01G0113500|transcript|OS01T0113500-01|protein_coding|1/3|c.634_635insGA|p.Val212fs|808/2542|635/1911|212/636||,GGA|downstream_gene_variant|MODIFIER|OS01G0113450|OS01G0113450|transcript|OS01T0113450-00|protein_coding||c.*1321_*1322insGA|||||1159|,GGA|intron_variant|MODIFIER|OS01G0113400|OS01G0113400|transcript|OS01T0113400-01|protein_coding|3/5|c.59-1197_…
chr01	734881	C	CATTT	3273.76	0/0	0/0	0/0	0/0	1|1	0/0	0/0	1|1	0/0	0/0	0/0	0/0	1|1	0/0	0/0	0/0	0/0	0/0	0/0	0/0	0/0	0/0	0/0	0/0	CATTT|frameshift_variant|HIGH|OS01G0113500|OS01G0113500|transcript|OS01T0113500-01|protein_coding|1/3|c.638_639insATTT|p.Ala214fs|812/2542|639/1911|213/636||,CATTT|downstream_gene_variant|MODIFIER|OS01G0113450|OS01G0113450|transcript|OS01T0113450-00|protein_coding||c.*1325_*1326insATTT|||||1163|,CATTT|intron_variant|MODIFIER|OS01G0113400|OS01G0113400|transcript|OS01T0113400-01|protein_coding|3/5|…
chr01	734888	T	TGGC	2733.74	0/0	0/0	0/0	0/0	1|1	0/0	0/0	1|1	0/0	0/0	0/0	0/0	1|1	0/0	0/0	0/0	0/0	0/0	0/0	0/0	0/0	0/0	0/0	0/0	TGGC|disruptive_inframe_insertion|MODERATE|OS01G0113500|OS01G0113500|transcript|OS01T0113500-01|protein_coding|1/3|c.647_648insCGG|p.Gly216dup|821/2542|648/1911|216/636||INFO_REALIGN_3_PRIME,TGGC|downstream_gene_variant|MODIFIER|OS01G0113450|OS01G0113450|transcript|OS01T0113450-00|protein_coding||c.*1332_*1333insGGC|||||1170|,TGGC|intron_variant|MODIFIER|OS01G0113400|OS01G0113400|transcript|OS01T…
chr01	734908	T	A	1383.29	0/0	0/0	0/0	0/0	1|1	0/0	0/0	1|1	0/0	0/0	0/0	0/0	1/1	0/0	0/0	0/0	0/0	0/0	0/0	0/0	0/0	0/0	0/0	0/0	A|missense_variant|MODERATE|OS01G0113500|OS01G0113500|transcript|OS01T0113500-01|protein_coding|1/3|c.665T>A|p.Leu222Gln|838/2542|665/1911|222/636||,A|downstream_gene_variant|MODIFIER|OS01G0113450|OS01G0113450|transcript|OS01T0113450-00|protein_coding||c.*1352T>A|||||1189|,A|intron_variant|MODIFIER|OS01G0113400|OS01G0113400|transcript|OS01T0113400-01|protein_coding|3/5|c.59-1227A>T||||||WARNING_T…
chr01	736353	C	G	4914.73	0/0	0/0	0/0	0/0	1|1	0/0	0/0	1|1	0/0	0/0	0/0	0/0	1|1	0/0	0/0	0/0	0/0	0/0	0/0	0/0	0/0	0/0	0/0	0/0	G|missense_variant|MODERATE|OS01G0113500|OS01G0113500|transcript|OS01T0113500-01|protein_coding|3/3|c.1166C>G|p.Thr389Arg|1339/2542|1166/1911|389/636||,G|downstream_gene_variant|MODIFIER|OS01G0113600|OS01G0113600|transcript|OS01T0113600-01|protein_coding||c.*4155G>C|||||1930|,G|intron_variant|MODIFIER|OS01G0113400|OS01G0113400|transcript|OS01T0113400-01|protein_coding|3/5|c.58+964G>C||||||WARNING…
chr01	736364	A	G	4263.73	0/0	0/0	0/0	0/0	1|1	0/0	0/0	1|1	0/0	0/0	0/0	0/0	1|1	0/0	0/0	0/0	0/0	0/0	0/0	0/0	0/0	0/0	0/0	0/0	G|missense_variant|MODERATE|OS01G0113500|OS01G0113500|transcript|OS01T0113500-01|protein_coding|3/3|c.1177A>G|p.Thr393Ala|1350/2542|1177/1911|393/636||,G|downstream_gene_variant|MODIFIER|OS01G0113600|OS01G0113600|transcript|OS01T0113600-01|protein_coding||c.*4144T>C|||||1919|,G|intron_variant|MODIFIER|OS01G0113400|OS01G0113400|transcript|OS01T0113400-01|protein_coding|3/5|c.58+953T>C||||||WARNING…
chr01	736890	A	G	7047.73	0/0	0/0	0/0	0/0	1/1	0/0	0/0	1/1	0/0	0/0	0/0	0/0	1/1	0/0	0/0	0/0	0/0	0/0	0/0	0/0	0/0	0/0	0/0	0/0	G|missense_variant|MODERATE|OS01G0113500|OS01G0113500|transcript|OS01T0113500-01|protein_coding|3/3|c.1703A>G|p.Glu568Gly|1876/2542|1703/1911|568/636||,G|downstream_gene_variant|MODIFIER|OS01G0113600|OS01G0113600|transcript|OS01T0113600-01|protein_coding||c.*3618T>C|||||1393|,G|downstream_gene_variant|MODIFIER|OS01G0113600|OS01G0113600|transcript|OS01T0113600-02|protein_coding||c.*3618T>C|||||185…
chr01	737013	C	T	6088.73	0/0	0/0	0/0	0/0	1/1	0/0	0/0	1/1	0/0	0/0	0/0	0/0	1/1	0/0	0/0	0/0	0/0	0/0	0/0	0/0	0/0	0/0	0/0	0/0	T|missense_variant|MODERATE|OS01G0113500|OS01G0113500|transcript|OS01T0113500-01|protein_coding|3/3|c.1826C>T|p.Ala609Val|1999/2542|1826/1911|609/636||,T|upstream_gene_variant|MODIFIER|OS01G0113650|OS01G0113650|transcript|OS01T0113650-00|protein_coding||c.-1915C>T|||||1895|,T|downstream_gene_variant|MODIFIER|OS01G0113600|OS01G0113600|transcript|OS01T0113600-01|protein_coding||c.*3495G>A|||||1270|…
chr01	737354	C	A	7316.73	0/0	0/0	0/0	0/0	1/1	0/0	0/0	1/1	0/0	0/0	0/0	0/0	1/1	0/0	0/0	0/0	0/0	0/0	0/0	0/0	0/0	0/0	0/0	0/0	A|missense_variant|MODERATE|OS01G0113400|OS01G0113400|transcript|OS01T0113400-01|protein_coding|3/6|c.21G>T|p.Gln7His|468/2662|21/2034|7/677||WARNING_TRANSCRIPT_NO_START_CODON,A|3_prime_UTR_variant|MODIFIER|OS01G0113500|OS01G0113500|transcript|OS01T0113500-01|protein_coding|3/3|c.*256C>A|||||256|,A|upstream_gene_variant|MODIFIER|OS01G0113650|OS01G0113650|transcript|OS01T0113650-00|protein_coding|…
chr01	739178	C	T	7112.73	0/0	0/0	0/0	0/0	1/1	0/0	0/0	1/1	0/0	0/0	0/0	0/0	1/1	0/0	0/0	0/0	0/0	0/0	0/0	0/0	0/0	0/0	0/0	0/0	T|missense_variant|MODERATE|OS01G0113650|OS01G0113650|transcript|OS01T0113650-00|protein_coding|1/1|c.251C>T|p.Ser84Leu|271/1991|251/1971|84/656||,T|3_prime_UTR_variant|MODIFIER|OS01G0113600|OS01G0113600|transcript|OS01T0113600-02|protein_coding|2/2|c.*1330G>A|||||1330|,T|upstream_gene_variant|MODIFIER|OS01G0113400|OS01G0113400|transcript|OS01T0113400-01|protein_coding||c.-1804G>A|||||1158|WARNIN…
chr01	739339	G	A	7684.73	0/0	0/0	0/0	0/0	1/1	0/0	0/0	1/1	0/0	0/0	0/0	0/0	1/1	0/0	0/0	0/0	0/0	0/0	0/0	0/0	0/0	0/0	0/0	0/0	A|missense_variant|MODERATE|OS01G0113650|OS01G0113650|transcript|OS01T0113650-00|protein_coding|1/1|c.412G>A|p.Val138Met|432/1991|412/1971|138/656||,A|3_prime_UTR_variant|MODIFIER|OS01G0113600|OS01G0113600|transcript|OS01T0113600-02|protein_coding|2/2|c.*1169C>T|||||1169|,A|upstream_gene_variant|MODIFIER|OS01G0113400|OS01G0113400|transcript|OS01T0113400-01|protein_coding||c.-1965C>T|||||1319|WARN…
chr01	739694	C	T	6636.73	0/0	0/0	0/0	0/0	1/1	0/0	0/0	1/1	0/0	0/0	0/0	0/0	1/1	0/0	0/0	0/0	0/0	0/0	0/0	0/0	0/0	0/0	0/0	0/0	T|missense_variant|MODERATE|OS01G0113650|OS01G0113650|transcript|OS01T0113650-00|protein_coding|1/1|c.767C>T|p.Pro256Leu|787/1991|767/1971|256/656||,T|3_prime_UTR_variant|MODIFIER|OS01G0113600|OS01G0113600|transcript|OS01T0113600-02|protein_coding|2/2|c.*814G>A|||||814|,T|upstream_gene_variant|MODIFIER|OS01G0113400|OS01G0113400|transcript|OS01T0113400-01|protein_coding||c.-2320G>A|||||1674|WARNIN…
chr01	743201	T	C	7297.73	0/0	0/0	0/0	0/0	1|1	0/0	0/0	1|1	0/0	0/0	0/0	0/0	1|1	0/0	0/0	0/0	0/0	0/0	0/0	0/0	0/0	0/0	0/0	0/0	C|missense_variant|MODERATE|OS01G0113700|OS01G0113700|transcript|OS01T0113700-00|protein_coding|3/3|c.1738A>G|p.Asn580Asp|1738/2079|1738/2058|580/685||,C|upstream_gene_variant|MODIFIER|OS01G0113600|OS01G0113600|transcript|OS01T0113600-01|protein_coding||c.-1549A>G|||||1404|,C|upstream_gene_variant|MODIFIER|OS01G0113600|OS01G0113600|transcript|OS01T0113600-02|protein_coding||c.-1549A>G|||||1438|,C…
chr01	743282	T	C	6306.73	0/0	0/0	0/0	0/0	1/1	0/0	0/0	1/1	0/0	0/0	0/0	0/0	1/1	0/0	0/0	0/0	0/0	0/0	0/0	0/0	0/0	0/0	0/0	0/0	C|missense_variant|MODERATE|OS01G0113700|OS01G0113700|transcript|OS01T0113700-00|protein_coding|3/3|c.1657A>G|p.Ile553Val|1657/2079|1657/2058|553/685||,C|upstream_gene_variant|MODIFIER|OS01G0113600|OS01G0113600|transcript|OS01T0113600-01|protein_coding||c.-1630A>G|||||1485|,C|upstream_gene_variant|MODIFIER|OS01G0113600|OS01G0113600|transcript|OS01T0113600-02|protein_coding||c.-1630A>G|||||1519|,C…
chr01	743351	T	C	7217.73	0/0	0/0	0/0	0/0	1/1	0/0	0/0	1/1	0/0	0/0	0/0	0/0	1/1	0/0	0/0	0/0	0/0	0/0	0/0	0/0	0/0	0/0	0/0	0/0	C|missense_variant|MODERATE|OS01G0113700|OS01G0113700|transcript|OS01T0113700-00|protein_coding|3/3|c.1588A>G|p.Met530Val|1588/2079|1588/2058|530/685||,C|upstream_gene_variant|MODIFIER|OS01G0113600|OS01G0113600|transcript|OS01T0113600-01|protein_coding||c.-1699A>G|||||1554|,C|upstream_gene_variant|MODIFIER|OS01G0113600|OS01G0113600|transcript|OS01T0113600-02|protein_coding||c.-1699A>G|||||1588|,C…
chr01	743607	A	T	6092.73	0/0	0/0	0/0	0/0	1/1	0/0	0/0	1/1	0/0	0/0	0/0	0/0	1/1	0/0	0/0	0/0	0/0	0/0	0/0	0/0	0/0	0/0	0/0	0/0	T|missense_variant|MODERATE|OS01G0113700|OS01G0113700|transcript|OS01T0113700-00|protein_coding|3/3|c.1332T>A|p.Ser444Arg|1332/2079|1332/2058|444/685||,T|upstream_gene_variant|MODIFIER|OS01G0113600|OS01G0113600|transcript|OS01T0113600-01|protein_coding||c.-1955T>A|||||1810|,T|upstream_gene_variant|MODIFIER|OS01G0113800|OS01G0113800|transcript|OS01T0113800-01|protein_coding||c.-1975A>T|||||1845|,T…
chr01	743720	A	C	7976.73	0/0	0/0	0/0	0/0	1|1	0/0	0/0	1|1	0/0	0/0	0/0	0/0	1|1	0/0	0/0	0/0	0/0	0/0	0/0	0/0	0/0	0/0	0/0	0/0	C|missense_variant|MODERATE|OS01G0113700|OS01G0113700|transcript|OS01T0113700-00|protein_coding|3/3|c.1219T>G|p.Ser407Ala|1219/2079|1219/2058|407/685||,C|upstream_gene_variant|MODIFIER|OS01G0113600|OS01G0113600|transcript|OS01T0113600-01|protein_coding||c.-2068T>G|||||1923|,C|upstream_gene_variant|MODIFIER|OS01G0113800|OS01G0113800|transcript|OS01T0113800-01|protein_coding||c.-1862A>C|||||1732|,C…
chr01	743875	T	C	6559.73	0/0	0/0	0/0	0/0	1|1	0/0	0/0	1|1	0/0	0/0	0/0	0/0	1|1	0/0	0/0	0/0	0/0	0/0	0/0	0/0	0/0	0/0	0/0	0/0	C|missense_variant|MODERATE|OS01G0113700|OS01G0113700|transcript|OS01T0113700-00|protein_coding|3/3|c.1064A>G|p.Gln355Arg|1064/2079|1064/2058|355/685||,C|upstream_gene_variant|MODIFIER|OS01G0113800|OS01G0113800|transcript|OS01T0113800-01|protein_coding||c.-1707T>C|||||1577|,C|non_coding_transcript_exon_variant|MODIFIER|OS01G0113750|OS01G0113750|transcript|OS01T0113750-00|lincRNA|1/2|n.993T>C||||||
chr01	744106	T	C	5707.73	0/0	0/0	0/0	0/0	1|1	0/0	0/0	1|1	0/0	0/0	0/0	0/0	1|1	0/0	0/0	0/0	0/0	0/0	0/0	0/0	0/0	0/0	0/0	0/0	C|missense_variant|MODERATE|OS01G0113700|OS01G0113700|transcript|OS01T0113700-00|protein_coding|2/3|c.955A>G|p.Ile319Val|955/2079|955/2058|319/685||,C|upstream_gene_variant|MODIFIER|OS01G0113800|OS01G0113800|transcript|OS01T0113800-01|protein_coding||c.-1476T>C|||||1346|,C|non_coding_transcript_exon_variant|MODIFIER|OS01G0113750|OS01G0113750|transcript|OS01T0113750-00|lincRNA|1/2|n.1224T>C||||||
chr01	744226	C	T	6089.73	0/0	0/0	0/0	0/0	1/1	0/0	0/0	1/1	0/0	0/0	0/0	0/0	1/1	0/0	0/0	0/0	0/0	0/0	0/0	0/0	0/0	0/0	0/0	0/0	T|missense_variant|MODERATE|OS01G0113700|OS01G0113700|transcript|OS01T0113700-00|protein_coding|2/3|c.835G>A|p.Gly279Arg|835/2079|835/2058|279/685||,T|upstream_gene_variant|MODIFIER|OS01G0113800|OS01G0113800|transcript|OS01T0113800-01|protein_coding||c.-1356C>T|||||1226|,T|intron_variant|MODIFIER|OS01G0113750|OS01G0113750|transcript|OS01T0113750-00|lincRNA|1/1|n.1307+37C>T||||||
chr01	744263	G	C	6810.73	0/0	0/0	0/0	0/0	1|1	0/0	0/0	1|1	0/0	0/0	0/0	0/0	1|1	0/0	0/0	0/0	0/0	0/0	0/0	0/0	0/0	0/0	0/0	0/0	C|missense_variant|MODERATE|OS01G0113700|OS01G0113700|transcript|OS01T0113700-00|protein_coding|2/3|c.798C>G|p.Ile266Met|798/2079|798/2058|266/685||,C|upstream_gene_variant|MODIFIER|OS01G0113800|OS01G0113800|transcript|OS01T0113800-01|protein_coding||c.-1319G>C|||||1189|,C|intron_variant|MODIFIER|OS01G0113750|OS01G0113750|transcript|OS01T0113750-00|lincRNA|1/1|n.1307+74G>C||||||
chr01	744286	T	A	6351.73	0/0	0/0	0/0	0/0	1/1	0/0	0/0	1/1	0/0	0/0	0/0	0/0	1/1	0/0	0/0	0/0	0/0	0/0	0/0	0/0	0/0	0/0	0/0	0/0	A|missense_variant|MODERATE|OS01G0113700|OS01G0113700|transcript|OS01T0113700-00|protein_coding|2/3|c.775A>T|p.Ile259Phe|775/2079|775/2058|259/685||,A|upstream_gene_variant|MODIFIER|OS01G0113800|OS01G0113800|transcript|OS01T0113800-01|protein_coding||c.-1296T>A|||||1166|,A|intron_variant|MODIFIER|OS01G0113750|OS01G0113750|transcript|OS01T0113750-00|lincRNA|1/1|n.1308-96T>A||||||
chr01	744475	T	C	7049.73	0/0	0/0	0/0	0/0	1|1	0/0	0/0	1|1	0/0	0/0	0/0	0/0	1|1	0/0	0/0	0/0	0/0	0/0	0/0	0/0	0/0	0/0	0/0	0/0	C|missense_variant|MODERATE|OS01G0113700|OS01G0113700|transcript|OS01T0113700-00|protein_coding|1/3|c.703A>G|p.Ile235Val|703/2079|703/2058|235/685||,C|upstream_gene_variant|MODIFIER|OS01G0113800|OS01G0113800|transcript|OS01T0113800-01|protein_coding||c.-1107T>C|||||977|,C|non_coding_transcript_exon_variant|MODIFIER|OS01G0113750|OS01G0113750|transcript|OS01T0113750-00|lincRNA|2/2|n.1401T>C||||||
chr01	744496	T	G	7315.73	0/0	0/0	0/0	0/0	1|1	0/0	0/0	1|1	0/0	0/0	0/0	0/0	1|1	0/0	0/0	0/0	0/0	0/0	0/0	0/0	0/0	0/0	0/0	0/0	G|missense_variant|MODERATE|OS01G0113700|OS01G0113700|transcript|OS01T0113700-00|protein_coding|1/3|c.682A>C|p.Ile228Leu|682/2079|682/2058|228/685||,G|upstream_gene_variant|MODIFIER|OS01G0113800|OS01G0113800|transcript|OS01T0113800-01|protein_coding||c.-1086T>G|||||956|,G|non_coding_transcript_exon_variant|MODIFIER|OS01G0113750|OS01G0113750|transcript|OS01T0113750-00|lincRNA|2/2|n.1422T>G||||||
chr01	744503	A	T	7214.73	0/0	0/0	0/0	0/0	1|1	0/0	0/0	1|1	0/0	0/0	0/0	0/0	1|1	0/0	0/0	0/0	0/0	0/0	0/0	0/0	0/0	0/0	0/0	0/0	T|missense_variant|MODERATE|OS01G0113700|OS01G0113700|transcript|OS01T0113700-00|protein_coding|1/3|c.675T>A|p.His225Gln|675/2079|675/2058|225/685||,T|upstream_gene_variant|MODIFIER|OS01G0113800|OS01G0113800|transcript|OS01T0113800-01|protein_coding||c.-1079A>T|||||949|,T|non_coding_transcript_exon_variant|MODIFIER|OS01G0113750|OS01G0113750|transcript|OS01T0113750-00|lincRNA|2/2|n.1429A>T||||||
chr01	744577	A	T	6520.73	0/0	0/0	0/0	0/0	1|1	0/0	0/0	1|1	0/0	0/0	0/0	0/0	1|1	0/0	0/0	0/0	0/0	0/0	0/0	0/0	0/0	0/0	0/0	0/0	T|missense_variant|MODERATE|OS01G0113700|OS01G0113700|transcript|OS01T0113700-00|protein_coding|1/3|c.601T>A|p.Trp201Arg|601/2079|601/2058|201/685||,T|upstream_gene_variant|MODIFIER|OS01G0113800|OS01G0113800|transcript|OS01T0113800-01|protein_coding||c.-1005A>T|||||875|,T|non_coding_transcript_exon_variant|MODIFIER|OS01G0113750|OS01G0113750|transcript|OS01T0113750-00|lincRNA|2/2|n.1503A>T||||||
chr01	744627	C	T	6385.73	0/0	0/0	0/0	0/0	1/1	0/0	0/0	1/1	0/0	0/0	0/0	0/0	1/1	0/0	0/0	0/0	0/0	0/0	0/0	0/0	0/0	0/0	0/0	0/0	T|missense_variant|MODERATE|OS01G0113700|OS01G0113700|transcript|OS01T0113700-00|protein_coding|1/3|c.551G>A|p.Gly184Glu|551/2079|551/2058|184/685||,T|upstream_gene_variant|MODIFIER|OS01G0113800|OS01G0113800|transcript|OS01T0113800-01|protein_coding||c.-955C>T|||||825|,T|non_coding_transcript_exon_variant|MODIFIER|OS01G0113750|OS01G0113750|transcript|OS01T0113750-00|lincRNA|2/2|n.1553C>T||||||
chr01	744641	A	ACCC	7362.77	0/0	0/0	0/0	0/0	1|1	0/0	0/0	1|1	0/0	0/0	0/0	0/0	1|1	0/0	0/0	0/0	0/0	0/0	0/0	0/0	0/0	0/0	0/0	0/0	ACCC|disruptive_inframe_insertion|MODERATE|OS01G0113700|OS01G0113700|transcript|OS01T0113700-00|protein_coding|1/3|c.536_537insGGG|p.Val179_Phe180insGly|536/2079|536/2058|179/685||,ACCC|upstream_gene_variant|MODIFIER|OS01G0113800|OS01G0113800|transcript|OS01T0113800-01|protein_coding||c.-941_-940insCCC|||||810|,ACCC|non_coding_transcript_exon_variant|MODIFIER|OS01G0113750|OS01G0113750|transcript|…
chr01	744642	A	T	7470.73	0/0	0/0	0/0	0/0	1|1	0/0	0/0	1|1	0/0	0/0	0/0	0/0	1|1	0/0	0/0	0/0	0/0	0/0	0/0	0/0	0/0	0/0	0/0	0/0	T|missense_variant|MODERATE|OS01G0113700|OS01G0113700|transcript|OS01T0113700-00|protein_coding|1/3|c.536T>A|p.Val179Asp|536/2079|536/2058|179/685||,T|upstream_gene_variant|MODIFIER|OS01G0113800|OS01G0113800|transcript|OS01T0113800-01|protein_coding||c.-940A>T|||||810|,T|non_coding_transcript_exon_variant|MODIFIER|OS01G0113750|OS01G0113750|transcript|OS01T0113750-00|lincRNA|2/2|n.1568A>T||||||
chr01	744645	G	A	7044.73	0/0	0/0	0/0	0/0	1|1	0/0	0/0	1|1	0/0	0/0	0/0	0/0	1|1	0/0	0/0	0/0	0/0	0/0	0/0	0/0	0/0	0/0	0/0	0/0	A|missense_variant|MODERATE|OS01G0113700|OS01G0113700|transcript|OS01T0113700-00|protein_coding|1/3|c.533C>T|p.Ser178Phe|533/2079|533/2058|178/685||,A|upstream_gene_variant|MODIFIER|OS01G0113800|OS01G0113800|transcript|OS01T0113800-01|protein_coding||c.-937G>A|||||807|,A|non_coding_transcript_exon_variant|MODIFIER|OS01G0113750|OS01G0113750|transcript|OS01T0113750-00|lincRNA|2/2|n.1571G>A||||||
chr01	744656	T	C	7382.73	0/0	0/0	0/0	0/0	1|1	0/0	0/0	1|1	0/0	0/0	0/0	0/0	1|1	0/0	0/0	0/0	0/0	0/0	0/0	0/0	0/0	0/0	0/0	0/0	C|missense_variant|MODERATE|OS01G0113700|OS01G0113700|transcript|OS01T0113700-00|protein_coding|1/3|c.522A>G|p.Ile174Met|522/2079|522/2058|174/685||,C|upstream_gene_variant|MODIFIER|OS01G0113800|OS01G0113800|transcript|OS01T0113800-01|protein_coding||c.-926T>C|||||796|,C|non_coding_transcript_exon_variant|MODIFIER|OS01G0113750|OS01G0113750|transcript|OS01T0113750-00|lincRNA|2/2|n.1582T>C||||||
chr01	744666	C	A	7598.73	0/0	0/0	0/0	0/0	1|1	0/0	0/0	1|1	0/0	0/0	0/0	0/0	1|1	0/0	0/0	0/0	0/0	0/0	0/0	0/0	0/0	0/0	0/0	0/0	A|missense_variant|MODERATE|OS01G0113700|OS01G0113700|transcript|OS01T0113700-00|protein_coding|1/3|c.512G>T|p.Gly171Val|512/2079|512/2058|171/685||,A|upstream_gene_variant|MODIFIER|OS01G0113800|OS01G0113800|transcript|OS01T0113800-01|protein_coding||c.-916C>A|||||786|,A|non_coding_transcript_exon_variant|MODIFIER|OS01G0113750|OS01G0113750|transcript|OS01T0113750-00|lincRNA|2/2|n.1592C>A||||||
chr01	744673	C	T	7939.73	0/0	0/0	0/0	0/0	1|1	0/0	0/0	1|1	0/0	0/0	0/0	0/0	1|1	0/0	0/0	0/0	0/0	0/0	0/0	0/0	0/0	0/0	0/0	0/0	T|missense_variant|MODERATE|OS01G0113700|OS01G0113700|transcript|OS01T0113700-00|protein_coding|1/3|c.505G>A|p.Val169Met|505/2079|505/2058|169/685||,T|upstream_gene_variant|MODIFIER|OS01G0113800|OS01G0113800|transcript|OS01T0113800-01|protein_coding||c.-909C>T|||||779|,T|non_coding_transcript_exon_variant|MODIFIER|OS01G0113750|OS01G0113750|transcript|OS01T0113750-00|lincRNA|2/2|n.1599C>T||||||
chr01	744685	A	G	7852.73	0/0	0/0	0/0	0/0	1|1	0/0	0/0	1|1	0/0	0/0	0/0	0/0	1|1	0/0	0/0	0/0	0/0	0/0	0/0	0/0	0/0	0/0	0/0	0/0	G|missense_variant|MODERATE|OS01G0113700|OS01G0113700|transcript|OS01T0113700-00|protein_coding|1/3|c.493T>C|p.Ser165Pro|493/2079|493/2058|165/685||,G|upstream_gene_variant|MODIFIER|OS01G0113800|OS01G0113800|transcript|OS01T0113800-01|protein_coding||c.-897A>G|||||767|,G|non_coding_transcript_exon_variant|MODIFIER|OS01G0113750|OS01G0113750|transcript|OS01T0113750-00|lincRNA|2/2|n.1611A>G||||||
chr01	744776	AGGTC	A	5679.81	0/0	0/0	0/0	0/0	./.	0/0	0/0	1|1	0/0	0/0	0/0	0/0	./.	0/0	0/0	0/0	0/0	0/0	0/0	0/0	0/0	0/0	0/0	0/0	A|frameshift_variant|HIGH|OS01G0113700|OS01G0113700|transcript|OS01T0113700-00|protein_coding|1/3|c.398_401delGACC|p.Gly133fs|401/2079|398/2058|133/685||,A|upstream_gene_variant|MODIFIER|OS01G0113800|OS01G0113800|transcript|OS01T0113800-01|protein_coding||c.-805_-802delGGTC|||||675|,A|non_coding_transcript_exon_variant|MODIFIER|OS01G0113750|OS01G0113750|transcript|OS01T0113750-00|lincRNA|2/2|n.17…
chr01	744793	C	T	4428.81	0/0	0/0	0/0	0/0	./.	0/0	0/0	1/1	0/0	0/0	0/0	0/0	./.	0/0	0/0	0/0	0/0	0/0	0/0	0/0	0/0	0/0	0/0	0/0	T|missense_variant|MODERATE|OS01G0113700|OS01G0113700|transcript|OS01T0113700-00|protein_coding|1/3|c.385G>A|p.Ala129Thr|385/2079|385/2058|129/685||,T|upstream_gene_variant|MODIFIER|OS01G0113800|OS01G0113800|transcript|OS01T0113800-01|protein_coding||c.-789C>T|||||659|,T|non_coding_transcript_exon_variant|MODIFIER|OS01G0113750|OS01G0113750|transcript|OS01T0113750-00|lincRNA|2/2|n.1719C>T||||||
chr01	744837	A	T	6623.73	0/0	0/0	0/0	0/0	1/1	0/0	0/0	1|1	0/0	0/0	0/0	0/0	1|1	0/0	0/0	0/0	0/0	0/0	0/0	0/0	0/0	0/0	0/0	0/0	T|missense_variant|MODERATE|OS01G0113700|OS01G0113700|transcript|OS01T0113700-00|protein_coding|1/3|c.341T>A|p.Phe114Tyr|341/2079|341/2058|114/685||,T|upstream_gene_variant|MODIFIER|OS01G0113800|OS01G0113800|transcript|OS01T0113800-01|protein_coding||c.-745A>T|||||615|,T|non_coding_transcript_exon_variant|MODIFIER|OS01G0113750|OS01G0113750|transcript|OS01T0113750-00|lincRNA|2/2|n.1763A>T||||||
chr01	745633	A	ACCT	6496.77	0/0	0/0	0/0	0/0	1|1	0/0	0/0	1|1	0/0	0/0	0/0	0/0	1|1	0/0	0/0	0/0	0/0	0/0	0/0	0/0	0/0	0/0	0/0	0/0	ACCT|disruptive_inframe_insertion|MODERATE|OS01G0113800|OS01G0113800|transcript|OS01T0113800-01|protein_coding|1/3|c.52_53insCCT|p.Ser18delinsThrCys|183/2399|53/1893|18/630||,ACCT|upstream_gene_variant|MODIFIER|OS01G0113700|OS01G0113700|transcript|OS01T0113700-00|protein_coding||c.-457_-456insAGG|||||457|,ACCT|upstream_gene_variant|MODIFIER|EPlOSAG00000018449|EPlOSAG00000018449|transcript|EPlOSAT…
chr01	745634	G	A	6676.73	0/0	0/0	0/0	0/0	1|1	0/0	0/0	1|1	0/0	0/0	0/0	0/0	1|1	0/0	0/0	0/0	0/0	0/0	0/0	0/0	0/0	0/0	0/0	0/0	A|missense_variant|MODERATE|OS01G0113800|OS01G0113800|transcript|OS01T0113800-01|protein_coding|1/3|c.53G>A|p.Ser18Asn|183/2399|53/1893|18/630||,A|upstream_gene_variant|MODIFIER|OS01G0113700|OS01G0113700|transcript|OS01T0113700-00|protein_coding||c.-457C>T|||||457|,A|upstream_gene_variant|MODIFIER|EPlOSAG00000018449|EPlOSAG00000018449|transcript|EPlOSAT00000019837|lincRNA||n.-1428G>A|||||1428|,A|…
chr01	745682	A	G	6300.73	0/0	0/0	0/0	0/0	1|1	0/0	0/0	1|1	0/0	0/0	0/0	0/0	1|1	0/0	0/0	0/0	0/0	0/0	0/0	0/0	0/0	0/0	0/0	0/0	G|missense_variant|MODERATE|OS01G0113800|OS01G0113800|transcript|OS01T0113800-01|protein_coding|1/3|c.101A>G|p.Lys34Arg|231/2399|101/1893|34/630||,G|upstream_gene_variant|MODIFIER|OS01G0113700|OS01G0113700|transcript|OS01T0113700-00|protein_coding||c.-505T>C|||||505|,G|upstream_gene_variant|MODIFIER|EPlOSAG00000018449|EPlOSAG00000018449|transcript|EPlOSAT00000019837|lincRNA||n.-1380A>G|||||1380|,…
chr01	745853	C	T	7134.73	0/0	0/0	0/0	0/0	1|1	0/0	0/0	1|1	0/0	0/0	0/0	0/0	1|1	0/0	0/0	0/0	0/0	0/0	0/0	0/0	0/0	0/0	0/0	0/0	T|missense_variant|MODERATE|OS01G0113800|OS01G0113800|transcript|OS01T0113800-01|protein_coding|1/3|c.272C>T|p.Ala91Val|402/2399|272/1893|91/630||,T|upstream_gene_variant|MODIFIER|OS01G0113700|OS01G0113700|transcript|OS01T0113700-00|protein_coding||c.-676G>A|||||676|,T|upstream_gene_variant|MODIFIER|EPlOSAG00000018449|EPlOSAG00000018449|transcript|EPlOSAT00000019837|lincRNA||n.-1209C>T|||||1209|,…
chr01	745949	C	A	7424.73	0/0	0/0	0/0	0/0	1/1	0/0	0/0	1/1	0/0	0/0	0/0	0/0	1/1	0/0	0/0	0/0	0/0	0/0	0/0	0/0	0/0	0/0	0/0	0/0	A|missense_variant|MODERATE|OS01G0113800|OS01G0113800|transcript|OS01T0113800-01|protein_coding|1/3|c.368C>A|p.Ala123Asp|498/2399|368/1893|123/630||,A|upstream_gene_variant|MODIFIER|OS01G0113700|OS01G0113700|transcript|OS01T0113700-00|protein_coding||c.-772G>T|||||772|,A|upstream_gene_variant|MODIFIER|EPlOSAG00000018449|EPlOSAG00000018449|transcript|EPlOSAT00000019837|lincRNA||n.-1113C>A|||||1113…
chr01	745978	C	T	7815.73	0/0	0/0	0/0	0/0	1/1	0/0	0/0	1/1	0/0	0/0	0/0	0/0	1/1	0/0	0/0	0/0	0/0	0/0	0/0	0/0	0/0	0/0	0/0	0/0	T|missense_variant|MODERATE|OS01G0113800|OS01G0113800|transcript|OS01T0113800-01|protein_coding|1/3|c.397C>T|p.Leu133Phe|527/2399|397/1893|133/630||,T|upstream_gene_variant|MODIFIER|OS01G0113700|OS01G0113700|transcript|OS01T0113700-00|protein_coding||c.-801G>A|||||801|,T|upstream_gene_variant|MODIFIER|EPlOSAG00000018449|EPlOSAG00000018449|transcript|EPlOSAT00000019837|lincRNA||n.-1084C>T|||||1084…
chr01	746108	C	G	6621.73	0/0	0/0	0/0	0/0	1|1	0/0	0/0	1|1	0/0	0/0	0/0	0/0	1|1	0/0	0/0	0/0	0/0	0/0	0/0	0/0	0/0	0/0	0/0	0/0	G|missense_variant|MODERATE|OS01G0113800|OS01G0113800|transcript|OS01T0113800-01|protein_coding|1/3|c.527C>G|p.Thr176Arg|657/2399|527/1893|176/630||,G|upstream_gene_variant|MODIFIER|OS01G0113700|OS01G0113700|transcript|OS01T0113700-00|protein_coding||c.-931G>C|||||931|,G|upstream_gene_variant|MODIFIER|EPlOSAG00000018449|EPlOSAG00000018449|transcript|EPlOSAT00000019837|lincRNA||n.-954C>G|||||954|,…
chr01	746137	C	T	5580.73	0/0	0/0	0/0	0/0	1/1	0/0	0/0	1/1	0/0	0/0	0/0	0/0	1/1	0/0	0/0	0/0	0/0	0/0	0/0	0/0	0/0	0/0	0/0	0/0	T|missense_variant|MODERATE|OS01G0113800|OS01G0113800|transcript|OS01T0113800-01|protein_coding|1/3|c.556C>T|p.Arg186Trp|686/2399|556/1893|186/630||,T|upstream_gene_variant|MODIFIER|OS01G0113700|OS01G0113700|transcript|OS01T0113700-00|protein_coding||c.-960G>A|||||960|,T|upstream_gene_variant|MODIFIER|EPlOSAG00000018449|EPlOSAG00000018449|transcript|EPlOSAT00000019837|lincRNA||n.-925C>T|||||925|,…
chr01	746189	A	G	6373.73	0/0	0/0	0/0	0/0	1|1	0/0	0/0	1|1	0/0	0/0	0/0	0/0	1|1	0/0	0/0	0/0	0/0	0/0	0/0	0/0	0/0	0/0	0/0	0/0	G|missense_variant|MODERATE|OS01G0113800|OS01G0113800|transcript|OS01T0113800-01|protein_coding|1/3|c.608A>G|p.Asn203Ser|738/2399|608/1893|203/630||,G|upstream_gene_variant|MODIFIER|OS01G0113700|OS01G0113700|transcript|OS01T0113700-00|protein_coding||c.-1012T>C|||||1012|,G|upstream_gene_variant|MODIFIER|EPlOSAG00000018449|EPlOSAG00000018449|transcript|EPlOSAT00000019837|lincRNA||n.-873A>G|||||873…
chr01	746210	A	ATGT	6315.77	0/0	0/0	0/0	0/0	1|1	0/0	0/0	1|1	0/0	0/0	0/0	0/0	1|1	0/0	0/0	0/0	0/0	0/0	0/0	0/0	0/0	0/0	0/0	0/0	ATGT|disruptive_inframe_insertion|MODERATE|OS01G0113800|OS01G0113800|transcript|OS01T0113800-01|protein_coding|1/3|c.629_630insTGT|p.Tyr210_Thr211insVal|760/2399|630/1893|210/630||,ATGT|upstream_gene_variant|MODIFIER|OS01G0113700|OS01G0113700|transcript|OS01T0113700-00|protein_coding||c.-1034_-1033insACA|||||1034|,ATGT|upstream_gene_variant|MODIFIER|EPlOSAG00000018449|EPlOSAG00000018449|transcrip…
chr01	746211	CACG	C	6315.73	0/0	0/0	0/0	0/0	1|1	0/0	0/0	1|1	0/0	0/0	0/0	0/0	1|1	0/0	0/0	0/0	0/0	0/0	0/0	0/0	0/0	0/0	0/0	0/0	C|conservative_inframe_deletion|MODERATE|OS01G0113800|OS01G0113800|transcript|OS01T0113800-01|protein_coding|1/3|c.631_633delACG|p.Thr211del|761/2399|631/1893|211/630||,C|upstream_gene_variant|MODIFIER|OS01G0113700|OS01G0113700|transcript|OS01T0113700-00|protein_coding||c.-1037_-1035delCGT|||||1035|,C|upstream_gene_variant|MODIFIER|EPlOSAG00000018449|EPlOSAG00000018449|transcript|EPlOSAT000000198…
chr01	746240	C	T	5059.73	0/0	0/0	0/0	0/0	1/1	0/0	0/0	1/1	0/0	0/0	0/0	0/0	1/1	0/0	0/0	0/0	0/0	0/0	0/0	0/0	0/0	0/0	0/0	0/0	T|missense_variant|MODERATE|OS01G0113800|OS01G0113800|transcript|OS01T0113800-01|protein_coding|1/3|c.659C>T|p.Ala220Val|789/2399|659/1893|220/630||,T|upstream_gene_variant|MODIFIER|OS01G0113700|OS01G0113700|transcript|OS01T0113700-00|protein_coding||c.-1063G>A|||||1063|,T|upstream_gene_variant|MODIFIER|EPlOSAG00000018449|EPlOSAG00000018449|transcript|EPlOSAT00000019837|lincRNA||n.-822C>T|||||822…
chr01	747514	G	A	2796.75	0/0	0/0	0/0	0/0	1/1	0/0	0/0	1/1	0/0	0/0	0/0	0/0	./.	0/0	0/0	0/0	0/0	0/0	0/0	0/0	0/0	0/0	0/0	0/0	A|missense_variant|MODERATE|OS01G0113800|OS01G0113800|transcript|OS01T0113800-01|protein_coding|3/3|c.838G>A|p.Ala280Thr|968/2399|838/1893|280/630||,A|downstream_gene_variant|MODIFIER|EPlOSAG00000018449|EPlOSAG00000018449|transcript|EPlOSAT00000019837|lincRNA||n.*297G>A|||||297|
chr01	747792	T	G	3318.73	0/0	0/0	0/0	0/0	1|1	0/0	0/0	1|1	0/0	0/0	0/0	0/0	1|1	0/0	0/0	0/0	0/0	0/0	0/0	0/0	0/0	0/0	0/0	0/0	G|missense_variant|MODERATE|OS01G0113800|OS01G0113800|transcript|OS01T0113800-01|protein_coding|3/3|c.1116T>G|p.Asp372Glu|1246/2399|1116/1893|372/630||,G|downstream_gene_variant|MODIFIER|EPlOSAG00000018449|EPlOSAG00000018449|transcript|EPlOSAT00000019837|lincRNA||n.*575T>G|||||575|
chr01	747800	C	A	3741.73	0/0	0/0	0/0	0/0	1|1	0/0	0/0	1|1	0/0	0/0	0/0	0/0	1|1	0/0	0/0	0/0	0/0	0/0	0/0	0/0	0/0	0/0	0/0	0/0	A|missense_variant|MODERATE|OS01G0113800|OS01G0113800|transcript|OS01T0113800-01|protein_coding|3/3|c.1124C>A|p.Thr375Asn|1254/2399|1124/1893|375/630||,A|downstream_gene_variant|MODIFIER|EPlOSAG00000018449|EPlOSAG00000018449|transcript|EPlOSAT00000019837|lincRNA||n.*583C>A|||||583|
chr01	748375	C	T	7986.73	0/0	0/0	0/0	0/0	1|1	0/0	0/0	1|1	0/0	0/0	0/0	0/0	1|1	0/0	0/0	0/0	0/0	0/0	0/0	0/0	0/0	0/0	0/0	0/0	T|missense_variant|MODERATE|OS01G0113800|OS01G0113800|transcript|OS01T0113800-01|protein_coding|3/3|c.1699C>T|p.Leu567Phe|1829/2399|1699/1893|567/630||,T|downstream_gene_variant|MODIFIER|EPlOSAG00000018449|EPlOSAG00000018449|transcript|EPlOSAT00000019837|lincRNA||n.*1158C>T|||||1158|
chr01	748376	T	A	8057.73	0/0	0/0	0/0	0/0	1|1	0/0	0/0	1|1	0/0	0/0	0/0	0/0	1|1	0/0	0/0	0/0	0/0	0/0	0/0	0/0	0/0	0/0	0/0	0/0	A|missense_variant|MODERATE|OS01G0113800|OS01G0113800|transcript|OS01T0113800-01|protein_coding|3/3|c.1700T>A|p.Leu567His|1830/2399|1700/1893|567/630||,A|downstream_gene_variant|MODIFIER|EPlOSAG00000018449|EPlOSAG00000018449|transcript|EPlOSAT00000019837|lincRNA||n.*1159T>A|||||1159|
chr01	748401	G	T	8374.73	0/0	0/0	0/0	0/0	1|1	0/0	0/0	1|1	0/0	0/0	0/0	0/0	1|1	0/0	0/0	0/0	0/0	0/0	0/0	0/0	0/0	0/0	0/0	0/0	T|missense_variant|MODERATE|OS01G0113800|OS01G0113800|transcript|OS01T0113800-01|protein_coding|3/3|c.1725G>T|p.Glu575Asp|1855/2399|1725/1893|575/630||,T|downstream_gene_variant|MODIFIER|EPlOSAG00000018449|EPlOSAG00000018449|transcript|EPlOSAT00000019837|lincRNA||n.*1184G>T|||||1184|
chr01	753109	T	G	6237.14	0/0	0/0	0/0	0/0	./.	0/0	1/1	./.	0/0	1/1	0/0	0/0	./.	0/0	0/0	0/0	0/0	0/0	0/0	1/1	0/0	0/0	0/0	0/0	G|missense_variant|MODERATE|OS01G0113900|OS01G0113900|transcript|OS01T0113900-01|protein_coding|3/3|c.1116A>C|p.Arg372Ser|1163/2192|1116/1278|372/425||,G|5_prime_UTR_variant|MODIFIER|OS01G0113950|OS01G0113950|transcript|OS01T0113950-00|protein_coding|1/3|c.-654T>G|||||1296|,G|upstream_gene_variant|MODIFIER|EPlOSAG00000006143|EPlOSAG00000006143|transcript|EPlOSAT00000007531|lincRNA||n.-1034T>G||||…
chr01	791618	G	T	6603.73	0/0	0/0	0/0	0/0	1|1	0/0	0/0	1|1	0/0	0/0	0/0	0/0	1|1	0/0	0/0	0/0	0/0	0/0	0/0	0/0	0/0	0/0	0/0	0/0	T|missense_variant|MODERATE|OS01G0114700|OS01G0114700|transcript|OS01T0114700-00|protein_coding|3/3|c.1091G>T|p.Arg364Ile|1146/1963|1091/1884|364/627||WARNING_TRANSCRIPT_NO_START_CODON,T|downstream_gene_variant|MODIFIER|OS01G0114800|OS01G0114800|transcript|OS01T0114800-01|protein_coding||c.*1470C>A|||||837|WARNING_TRANSCRIPT_NO_START_CODON
chr01	791631	G	T	6711.73	0/0	0/0	0/0	0/0	1|1	0/0	0/0	1|1	0/0	0/0	0/0	0/0	1|1	0/0	0/0	0/0	0/0	0/0	0/0	0/0	0/0	0/0	0/0	0/0	T|missense_variant|MODERATE|OS01G0114700|OS01G0114700|transcript|OS01T0114700-00|protein_coding|3/3|c.1104G>T|p.Gln368His|1159/1963|1104/1884|368/627||WARNING_TRANSCRIPT_NO_START_CODON,T|downstream_gene_variant|MODIFIER|OS01G0114800|OS01G0114800|transcript|OS01T0114800-01|protein_coding||c.*1457C>A|||||824|WARNING_TRANSCRIPT_NO_START_CODON
chr01	791663	G	C	1540.36	0/0	0/0	0/0	0/0	./.	0/0	0/0	./.	0/0	0/0	0/0	0/0	1|1	0/0	0/0	0/0	0/0	0/0	0/0	0/0	0/0	0/0	0/0	0/0	C|missense_variant|MODERATE|OS01G0114700|OS01G0114700|transcript|OS01T0114700-00|protein_coding|3/3|c.1136G>C|p.Arg379Thr|1191/1963|1136/1884|379/627||WARNING_TRANSCRIPT_NO_START_CODON,C|downstream_gene_variant|MODIFIER|OS01G0114800|OS01G0114800|transcript|OS01T0114800-01|protein_coding||c.*1425C>G|||||792|WARNING_TRANSCRIPT_NO_START_CODON
chr01	791722	A	G	6018.73	0/0	0/0	0/0	0/0	1|1	0/0	0/0	1|1	0/0	0/0	0/0	0/0	1|1	0/0	0/0	0/0	0/0	0/0	0/0	0/0	0/0	0/0	0/0	0/0	G|missense_variant|MODERATE|OS01G0114700|OS01G0114700|transcript|OS01T0114700-00|protein_coding|3/3|c.1195A>G|p.Thr399Ala|1250/1963|1195/1884|399/627||WARNING_TRANSCRIPT_NO_START_CODON,G|downstream_gene_variant|MODIFIER|OS01G0114800|OS01G0114800|transcript|OS01T0114800-01|protein_coding||c.*1366T>C|||||733|WARNING_TRANSCRIPT_NO_START_CODON
chr01	791814	C	A	5118.73	0/0	0/0	0/0	0/0	1|1	0/0	0/0	1|1	0/0	0/0	0/0	0/0	1|1	0/0	0/0	0/0	0/0	0/0	0/0	0/0	0/0	0/0	0/0	0/0	A|missense_variant|MODERATE|OS01G0114700|OS01G0114700|transcript|OS01T0114700-00|protein_coding|3/3|c.1287C>A|p.Asp429Glu|1342/1963|1287/1884|429/627||WARNING_TRANSCRIPT_NO_START_CODON,A|downstream_gene_variant|MODIFIER|OS01G0114800|OS01G0114800|transcript|OS01T0114800-01|protein_coding||c.*1274G>T|||||641|WARNING_TRANSCRIPT_NO_START_CODON
chr01	791821	C	G	5253.73	0/0	0/0	0/0	0/0	1|1	0/0	0/0	1|1	0/0	0/0	0/0	0/0	1|1	0/0	0/0	0/0	0/0	0/0	0/0	0/0	0/0	0/0	0/0	0/0	G|missense_variant|MODERATE|OS01G0114700|OS01G0114700|transcript|OS01T0114700-00|protein_coding|3/3|c.1294C>G|p.Leu432Val|1349/1963|1294/1884|432/627||WARNING_TRANSCRIPT_NO_START_CODON,G|downstream_gene_variant|MODIFIER|OS01G0114800|OS01G0114800|transcript|OS01T0114800-01|protein_coding||c.*1267G>C|||||634|WARNING_TRANSCRIPT_NO_START_CODON
chr01	791827	A	G	5460.73	0/0	0/0	0/0	0/0	1|1	0/0	0/0	1|1	0/0	0/0	0/0	0/0	1|1	0/0	0/0	0/0	0/0	0/0	0/0	0/0	0/0	0/0	0/0	0/0	G|missense_variant|MODERATE|OS01G0114700|OS01G0114700|transcript|OS01T0114700-00|protein_coding|3/3|c.1300A>G|p.Ile434Val|1355/1963|1300/1884|434/627||WARNING_TRANSCRIPT_NO_START_CODON,G|downstream_gene_variant|MODIFIER|OS01G0114800|OS01G0114800|transcript|OS01T0114800-01|protein_coding||c.*1261T>C|||||628|WARNING_TRANSCRIPT_NO_START_CODON
chr01	791830	T	G	5514.73	0/0	0/0	0/0	0/0	1|1	0/0	0/0	1|1	0/0	0/0	0/0	0/0	1|1	0/0	0/0	0/0	0/0	0/0	0/0	0/0	0/0	0/0	0/0	0/0	G|missense_variant|MODERATE|OS01G0114700|OS01G0114700|transcript|OS01T0114700-00|protein_coding|3/3|c.1303T>G|p.Ser435Ala|1358/1963|1303/1884|435/627||WARNING_TRANSCRIPT_NO_START_CODON,G|downstream_gene_variant|MODIFIER|OS01G0114800|OS01G0114800|transcript|OS01T0114800-01|protein_coding||c.*1258A>C|||||625|WARNING_TRANSCRIPT_NO_START_CODON
chr01	791910	G	C	5847.73	0/0	0/0	0/0	0/0	1|1	0/0	0/0	1|1	0/0	0/0	0/0	0/0	1|1	0/0	0/0	0/0	0/0	0/0	0/0	0/0	0/0	0/0	0/0	0/0	C|missense_variant|MODERATE|OS01G0114700|OS01G0114700|transcript|OS01T0114700-00|protein_coding|3/3|c.1383G>C|p.Gln461His|1438/1963|1383/1884|461/627||WARNING_TRANSCRIPT_NO_START_CODON,C|downstream_gene_variant|MODIFIER|OS01G0114800|OS01G0114800|transcript|OS01T0114800-01|protein_coding||c.*1178C>G|||||545|WARNING_TRANSCRIPT_NO_START_CODON
chr01	791931	C	A	5488.73	0/0	0/0	0/0	0/0	1|1	0/0	0/0	1|1	0/0	0/0	0/0	0/0	1|1	0/0	0/0	0/0	0/0	0/0	0/0	0/0	0/0	0/0	0/0	0/0	A|missense_variant|MODERATE|OS01G0114700|OS01G0114700|transcript|OS01T0114700-00|protein_coding|3/3|c.1404C>A|p.Ser468Arg|1459/1963|1404/1884|468/627||WARNING_TRANSCRIPT_NO_START_CODON,A|downstream_gene_variant|MODIFIER|OS01G0114800|OS01G0114800|transcript|OS01T0114800-01|protein_coding||c.*1157G>T|||||524|WARNING_TRANSCRIPT_NO_START_CODON
chr01	792382	G	T	2788.73	0/0	0/0	0/0	0/0	1/1	0/0	0/0	1/1	0/0	0/0	0/0	0/0	1/1	0/0	0/0	0/0	0/0	0/0	0/0	0/0	0/0	0/0	0/0	0/0	T|missense_variant|MODERATE|OS01G0114700|OS01G0114700|transcript|OS01T0114700-00|protein_coding|3/3|c.1855G>T|p.Val619Phe|1910/1963|1855/1884|619/627||WARNING_TRANSCRIPT_NO_START_CODON,T|downstream_gene_variant|MODIFIER|OS01G0114800|OS01G0114800|transcript|OS01T0114800-01|protein_coding||c.*706C>A|||||73|WARNING_TRANSCRIPT_NO_START_CODON
chr01	792407	C	CGT	2379.76	0/0	0/0	0/0	0/0	1|1	0/0	0/0	1|1	0/0	0/0	0/0	0/0	1|1	0/0	0/0	0/0	0/0	0/0	0/0	0/0	0/0	0/0	0/0	0/0	CGT|frameshift_variant|HIGH|OS01G0114700|OS01G0114700|transcript|OS01T0114700-00|protein_coding|3/3|c.1880_1881insGT|p.Ter628fs|1936/1963|1881/1884|627/627||WARNING_TRANSCRIPT_NO_START_CODON,CGT|downstream_gene_variant|MODIFIER|OS01G0114800|OS01G0114800|transcript|OS01T0114800-01|protein_coding||c.*680_*681insAC|||||47|WARNING_TRANSCRIPT_NO_START_CODON
chr01	792409	T	A	2379.73	0/0	0/0	0/0	0/0	1|1	0/0	0/0	1|1	0/0	0/0	0/0	0/0	1|1	0/0	0/0	0/0	0/0	0/0	0/0	0/0	0/0	0/0	0/0	0/0	A|stop_lost|HIGH|OS01G0114700|OS01G0114700|transcript|OS01T0114700-00|protein_coding|3/3|c.1882T>A|p.Ter628Lysext*?|1937/1963|1882/1884|628/627||WARNING_TRANSCRIPT_NO_START_CODON,A|downstream_gene_variant|MODIFIER|OS01G0114800|OS01G0114800|transcript|OS01T0114800-01|protein_coding||c.*679A>T|||||46|WARNING_TRANSCRIPT_NO_START_CODON
chr01	840340	C	A	5257.73	0/0	0/0	0/0	0/0	1|1	0/0	0/0	1|1	0/0	0/0	0/0	0/0	1|1	0/0	0/0	0/0	0/0	0/0	0/0	0/0	0/0	0/0	0/0	0/0	A|missense_variant|MODERATE|OS01G0115500|OS01G0115500|transcript|OS01T0115500-00|protein_coding|1/1|c.489G>T|p.Lys163Asn|489/1020|489/1020|163/339||WARNING_TRANSCRIPT_NO_START_CODON,A|downstream_gene_variant|MODIFIER|OS01G0115566|OS01G0115566|transcript|OS01T0115566-00|protein_coding||c.*1662G>T|||||1662|,A|non_coding_transcript_exon_variant|MODIFIER|OS01G0115533|OS01G0115533|transcript|OS01T0115…
chr01	840457	T	G	5779.73	0/0	0/0	0/0	0/0	1/1	0/0	0/0	1/1	0/0	0/0	0/0	0/0	1/1	0/0	0/0	0/0	0/0	0/0	0/0	0/0	0/0	0/0	0/0	0/0	G|missense_variant|MODERATE|OS01G0115500|OS01G0115500|transcript|OS01T0115500-00|protein_coding|1/1|c.372A>C|p.Glu124Asp|372/1020|372/1020|124/339||WARNING_TRANSCRIPT_NO_START_CODON,G|downstream_gene_variant|MODIFIER|OS01G0115566|OS01G0115566|transcript|OS01T0115566-00|protein_coding||c.*1545A>C|||||1545|,G|non_coding_transcript_exon_variant|MODIFIER|OS01G0115533|OS01G0115533|transcript|OS01T0115…
chr01	840510	T	G	6372.73	0/0	0/0	0/0	0/0	1/1	0/0	0/0	1/1	0/0	0/0	0/0	0/0	1/1	0/0	0/0	0/0	0/0	0/0	0/0	0/0	0/0	0/0	0/0	0/0	G|missense_variant|MODERATE|OS01G0115500|OS01G0115500|transcript|OS01T0115500-00|protein_coding|1/1|c.319A>C|p.Asn107His|319/1020|319/1020|107/339||WARNING_TRANSCRIPT_NO_START_CODON,G|downstream_gene_variant|MODIFIER|OS01G0115566|OS01G0115566|transcript|OS01T0115566-00|protein_coding||c.*1492A>C|||||1492|,G|non_coding_transcript_exon_variant|MODIFIER|OS01G0115533|OS01G0115533|transcript|OS01T0115…
chr01	840552	C	A	6500.73	0/0	0/0	0/0	0/0	1/1	0/0	0/0	1/1	0/0	0/0	0/0	0/0	1/1	0/0	0/0	0/0	0/0	0/0	0/0	0/0	0/0	0/0	0/0	0/0	A|missense_variant|MODERATE|OS01G0115500|OS01G0115500|transcript|OS01T0115500-00|protein_coding|1/1|c.277G>T|p.Ala93Ser|277/1020|277/1020|93/339||WARNING_TRANSCRIPT_NO_START_CODON,A|downstream_gene_variant|MODIFIER|OS01G0115566|OS01G0115566|transcript|OS01T0115566-00|protein_coding||c.*1450G>T|||||1450|,A|non_coding_transcript_exon_variant|MODIFIER|OS01G0115533|OS01G0115533|transcript|OS01T011553…
chr01	840730	CTCCGA	C	6809.73	0/0	0/0	0/0	0/0	1|1	0/0	0/0	1|1	0/0	0/0	0/0	0/0	1|1	0/0	0/0	0/0	0/0	0/0	0/0	0/0	0/0	0/0	0/0	0/0	C|frameshift_variant|HIGH|OS01G0115500|OS01G0115500|transcript|OS01T0115500-00|protein_coding|1/1|c.94_98delTCGGA|p.Ser32fs|98/1020|94/1020|32/339||WARNING_TRANSCRIPT_NO_START_CODON,C|downstream_gene_variant|MODIFIER|OS01G0115566|OS01G0115566|transcript|OS01T0115566-00|protein_coding||c.*1267_*1271delTCGGA|||||1271|,C|non_coding_transcript_exon_variant|MODIFIER|OS01G0115533|OS01G0115533|transcrip…
chr01	840753	A	G	6467.73	0/0	0/0	0/0	0/0	1|1	0/0	0/0	1|1	0/0	0/0	0/0	0/0	1|1	0/0	0/0	0/0	0/0	0/0	0/0	0/0	0/0	0/0	0/0	0/0	G|missense_variant|MODERATE|OS01G0115500|OS01G0115500|transcript|OS01T0115500-00|protein_coding|1/1|c.76T>C|p.Tyr26His|76/1020|76/1020|26/339||WARNING_TRANSCRIPT_NO_START_CODON,G|downstream_gene_variant|MODIFIER|OS01G0115566|OS01G0115566|transcript|OS01T0115566-00|protein_coding||c.*1249T>C|||||1249|,G|non_coding_transcript_exon_variant|MODIFIER|OS01G0115533|OS01G0115533|transcript|OS01T0115533-0…
chr01	840798	C	T	4691.73	0/0	0/0	0/0	0/0	1/1	0/0	0/0	1/1	0/0	0/0	0/0	0/0	1/1	0/0	0/0	0/0	0/0	0/0	0/0	0/0	0/0	0/0	0/0	0/0	T|missense_variant|MODERATE|OS01G0115500|OS01G0115500|transcript|OS01T0115500-00|protein_coding|1/1|c.31G>A|p.Asp11Asn|31/1020|31/1020|11/339||WARNING_TRANSCRIPT_NO_START_CODON,T|downstream_gene_variant|MODIFIER|OS01G0115566|OS01G0115566|transcript|OS01T0115566-00|protein_coding||c.*1204G>A|||||1204|,T|non_coding_transcript_exon_variant|MODIFIER|OS01G0115533|OS01G0115533|transcript|OS01T0115533-0…
chr01	842013	T	C	7658.73	0/0	0/0	0/0	0/0	1|1	0/0	0/0	1|1	0/0	0/0	0/0	0/0	1|1	0/0	0/0	0/0	0/0	0/0	0/0	0/0	0/0	0/0	0/0	0/0	C|missense_variant|MODERATE|OS01G0115566|OS01G0115566|transcript|OS01T0115566-00|protein_coding|1/1|c.745A>G|p.Thr249Ala|745/756|745/756|249/251||,C|upstream_gene_variant|MODIFIER|OS01G0115500|OS01G0115500|transcript|OS01T0115500-00|protein_coding||c.-1185A>G|||||1185|WARNING_TRANSCRIPT_NO_START_CODON,C|upstream_gene_variant|MODIFIER|OS01G0115600|OS01G0115600|transcript|OS01T0115600-01|protein_co…
chr01	842014	C	A	7658.73	0/0	0/0	0/0	0/0	1|1	0/0	0/0	1|1	0/0	0/0	0/0	0/0	1|1	0/0	0/0	0/0	0/0	0/0	0/0	0/0	0/0	0/0	0/0	0/0	A|missense_variant|MODERATE|OS01G0115566|OS01G0115566|transcript|OS01T0115566-00|protein_coding|1/1|c.744G>T|p.Glu248Asp|744/756|744/756|248/251||,A|upstream_gene_variant|MODIFIER|OS01G0115500|OS01G0115500|transcript|OS01T0115500-00|protein_coding||c.-1186G>T|||||1186|WARNING_TRANSCRIPT_NO_START_CODON,A|upstream_gene_variant|MODIFIER|OS01G0115600|OS01G0115600|transcript|OS01T0115600-01|protein_co…
chr01	842026	CT	C	6505.73	0/0	0/0	0/0	0/0	1|1	0/0	0/0	1|1	0/0	0/0	0/0	0/0	1|1	0/0	0/0	0/0	0/0	0/0	0/0	0/0	0/0	0/0	0/0	0/0	C|frameshift_variant|HIGH|OS01G0115566|OS01G0115566|transcript|OS01T0115566-00|protein_coding|1/1|c.731delA|p.Glu244fs|731/756|731/756|244/251||,C|upstream_gene_variant|MODIFIER|OS01G0115500|OS01G0115500|transcript|OS01T0115500-00|protein_coding||c.-1199delA|||||1199|WARNING_TRANSCRIPT_NO_START_CODON,C|upstream_gene_variant|MODIFIER|OS01G0115600|OS01G0115600|transcript|OS01T0115600-01|protein_cod…
chr01	842028	CCTTGAAAGAGTACGCAGCATCAA	C	6620.73	0/0	0/0	0/0	0/0	1|1	0/0	0/0	1|1	0/0	0/0	0/0	0/0	1|1	0/0	0/0	0/0	0/0	0/0	0/0	0/0	0/0	0/0	0/0	0/0	C|frameshift_variant|HIGH|OS01G0115566|OS01G0115566|transcript|OS01T0115566-00|protein_coding|1/1|c.707_729delTTGATGCTGCGTACTCTTTCAAG|p.Ile236fs|729/756|707/756|236/251||,C|upstream_gene_variant|MODIFIER|OS01G0115500|OS01G0115500|transcript|OS01T0115500-00|protein_coding||c.-1223_-1201delTTGATGCTGCGTACTCTTTCAAG|||||1201|WARNING_TRANSCRIPT_NO_START_CODON,C|upstream_gene_variant|MODIFIER|OS01G01156…
chr01	842054	G	T	6689.73	0/0	0/0	0/0	0/0	1|1	0/0	0/0	1|1	0/0	0/0	0/0	0/0	1|1	0/0	0/0	0/0	0/0	0/0	0/0	0/0	0/0	0/0	0/0	0/0	T|missense_variant|MODERATE|OS01G0115566|OS01G0115566|transcript|OS01T0115566-00|protein_coding|1/1|c.704C>A|p.Thr235Lys|704/756|704/756|235/251||,T|upstream_gene_variant|MODIFIER|OS01G0115500|OS01G0115500|transcript|OS01T0115500-00|protein_coding||c.-1226C>A|||||1226|WARNING_TRANSCRIPT_NO_START_CODON,T|upstream_gene_variant|MODIFIER|OS01G0115600|OS01G0115600|transcript|OS01T0115600-01|protein_co…
chr01	842086	C	G	6673.73	0/0	0/0	0/0	0/0	1|1	0/0	0/0	1|1	0/0	0/0	0/0	0/0	1|1	0/0	0/0	0/0	0/0	0/0	0/0	0/0	0/0	0/0	0/0	0/0	G|missense_variant|MODERATE|OS01G0115566|OS01G0115566|transcript|OS01T0115566-00|protein_coding|1/1|c.672G>C|p.Met224Ile|672/756|672/756|224/251||,G|upstream_gene_variant|MODIFIER|OS01G0115500|OS01G0115500|transcript|OS01T0115500-00|protein_coding||c.-1258G>C|||||1258|WARNING_TRANSCRIPT_NO_START_CODON,G|upstream_gene_variant|MODIFIER|OS01G0115600|OS01G0115600|transcript|OS01T0115600-01|protein_co…
chr01	842096	A	G	6856.73	0/0	0/0	0/0	0/0	1|1	0/0	0/0	1|1	0/0	0/0	0/0	0/0	1|1	0/0	0/0	0/0	0/0	0/0	0/0	0/0	0/0	0/0	0/0	0/0	G|missense_variant|MODERATE|OS01G0115566|OS01G0115566|transcript|OS01T0115566-00|protein_coding|1/1|c.662T>C|p.Val221Ala|662/756|662/756|221/251||,G|upstream_gene_variant|MODIFIER|OS01G0115500|OS01G0115500|transcript|OS01T0115500-00|protein_coding||c.-1268T>C|||||1268|WARNING_TRANSCRIPT_NO_START_CODON,G|upstream_gene_variant|MODIFIER|OS01G0115600|OS01G0115600|transcript|OS01T0115600-01|protein_co…
chr01	842132	C	G	6103.73	0/0	0/0	0/0	0/0	1/1	0/0	0/0	1/1	0/0	0/0	0/0	0/0	1/1	0/0	0/0	0/0	0/0	0/0	0/0	0/0	0/0	0/0	0/0	0/0	G|missense_variant|MODERATE|OS01G0115566|OS01G0115566|transcript|OS01T0115566-00|protein_coding|1/1|c.626G>C|p.Arg209Thr|626/756|626/756|209/251||,G|upstream_gene_variant|MODIFIER|OS01G0115500|OS01G0115500|transcript|OS01T0115500-00|protein_coding||c.-1304G>C|||||1304|WARNING_TRANSCRIPT_NO_START_CODON,G|upstream_gene_variant|MODIFIER|OS01G0115600|OS01G0115600|transcript|OS01T0115600-01|protein_co…
chr01	842144	C	T	6520.73	0/0	0/0	0/0	0/0	1|1	0/0	0/0	1|1	0/0	0/0	0/0	0/0	1|1	0/0	0/0	0/0	0/0	0/0	0/0	0/0	0/0	0/0	0/0	0/0	T|missense_variant|MODERATE|OS01G0115566|OS01G0115566|transcript|OS01T0115566-00|protein_coding|1/1|c.614G>A|p.Gly205Asp|614/756|614/756|205/251||,T|upstream_gene_variant|MODIFIER|OS01G0115500|OS01G0115500|transcript|OS01T0115500-00|protein_coding||c.-1316G>A|||||1316|WARNING_TRANSCRIPT_NO_START_CODON,T|upstream_gene_variant|MODIFIER|OS01G0115600|OS01G0115600|transcript|OS01T0115600-01|protein_co…
chr01	842147	T	C	6518.73	0/0	0/0	0/0	0/0	1|1	0/0	0/0	1|1	0/0	0/0	0/0	0/0	1|1	0/0	0/0	0/0	0/0	0/0	0/0	0/0	0/0	0/0	0/0	0/0	C|missense_variant|MODERATE|OS01G0115566|OS01G0115566|transcript|OS01T0115566-00|protein_coding|1/1|c.611A>G|p.His204Arg|611/756|611/756|204/251||,C|upstream_gene_variant|MODIFIER|OS01G0115500|OS01G0115500|transcript|OS01T0115500-00|protein_coding||c.-1319A>G|||||1319|WARNING_TRANSCRIPT_NO_START_CODON,C|upstream_gene_variant|MODIFIER|OS01G0115600|OS01G0115600|transcript|OS01T0115600-01|protein_co…
chr01	842190	T	C	5654.73	0/0	0/0	0/0	0/0	1/1	0/0	0/0	1/1	0/0	0/0	0/0	0/0	1/1	0/0	0/0	0/0	0/0	0/0	0/0	0/0	0/0	0/0	0/0	0/0	C|missense_variant|MODERATE|OS01G0115566|OS01G0115566|transcript|OS01T0115566-00|protein_coding|1/1|c.568A>G|p.Asn190Asp|568/756|568/756|190/251||,C|upstream_gene_variant|MODIFIER|OS01G0115500|OS01G0115500|transcript|OS01T0115500-00|protein_coding||c.-1362A>G|||||1362|WARNING_TRANSCRIPT_NO_START_CODON,C|upstream_gene_variant|MODIFIER|OS01G0115600|OS01G0115600|transcript|OS01T0115600-01|protein_co…
chr01	842198	T	TAAA	6255.77	0/0	0/0	0/0	0/0	1|1	0/0	0/0	1|1	0/0	0/0	0/0	0/0	1|1	0/0	0/0	0/0	0/0	0/0	0/0	0/0	0/0	0/0	0/0	0/0	TAAA|conservative_inframe_insertion|MODERATE|OS01G0115566|OS01G0115566|transcript|OS01T0115566-00|protein_coding|1/1|c.559_560insTTT|p.Cys186_Tyr187insPhe|559/756|559/756|187/251||,TAAA|upstream_gene_variant|MODIFIER|OS01G0115500|OS01G0115500|transcript|OS01T0115500-00|protein_coding||c.-1371_-1370insTTT|||||1371|WARNING_TRANSCRIPT_NO_START_CODON,TAAA|upstream_gene_variant|MODIFIER|OS01G0115600|O…
chr01	842201	C	A	6639.73	0/0	0/0	0/0	0/0	1|1	0/0	0/0	1|1	0/0	0/0	0/0	0/0	1|1	0/0	0/0	0/0	0/0	0/0	0/0	0/0	0/0	0/0	0/0	0/0	A|missense_variant|MODERATE|OS01G0115566|OS01G0115566|transcript|OS01T0115566-00|protein_coding|1/1|c.557G>T|p.Cys186Phe|557/756|557/756|186/251||,A|upstream_gene_variant|MODIFIER|OS01G0115500|OS01G0115500|transcript|OS01T0115500-00|protein_coding||c.-1373G>T|||||1373|WARNING_TRANSCRIPT_NO_START_CODON,A|upstream_gene_variant|MODIFIER|OS01G0115600|OS01G0115600|transcript|OS01T0115600-01|protein_co…
chr01	842208	A	T	6738.73	0/0	0/0	0/0	0/0	1|1	0/0	0/0	1|1	0/0	0/0	0/0	0/0	1|1	0/0	0/0	0/0	0/0	0/0	0/0	0/0	0/0	0/0	0/0	0/0	T|missense_variant|MODERATE|OS01G0115566|OS01G0115566|transcript|OS01T0115566-00|protein_coding|1/1|c.550T>A|p.Tyr184Asn|550/756|550/756|184/251||,T|upstream_gene_variant|MODIFIER|OS01G0115500|OS01G0115500|transcript|OS01T0115500-00|protein_coding||c.-1380T>A|||||1380|WARNING_TRANSCRIPT_NO_START_CODON,T|upstream_gene_variant|MODIFIER|OS01G0115600|OS01G0115600|transcript|OS01T0115600-01|protein_co…
chr01	842216	C	T	6761.73	0/0	0/0	0/0	0/0	1|1	0/0	0/0	1|1	0/0	0/0	0/0	0/0	1|1	0/0	0/0	0/0	0/0	0/0	0/0	0/0	0/0	0/0	0/0	0/0	T|missense_variant|MODERATE|OS01G0115566|OS01G0115566|transcript|OS01T0115566-00|protein_coding|1/1|c.542G>A|p.Gly181Asp|542/756|542/756|181/251||,T|upstream_gene_variant|MODIFIER|OS01G0115500|OS01G0115500|transcript|OS01T0115500-00|protein_coding||c.-1388G>A|||||1388|WARNING_TRANSCRIPT_NO_START_CODON,T|upstream_gene_variant|MODIFIER|OS01G0115600|OS01G0115600|transcript|OS01T0115600-01|protein_co…
chr01	842217	C	A	6581.73	0/0	0/0	0/0	0/0	1|1	0/0	0/0	1|1	0/0	0/0	0/0	0/0	1|1	0/0	0/0	0/0	0/0	0/0	0/0	0/0	0/0	0/0	0/0	0/0	A|missense_variant|MODERATE|OS01G0115566|OS01G0115566|transcript|OS01T0115566-00|protein_coding|1/1|c.541G>T|p.Gly181Cys|541/756|541/756|181/251||,A|upstream_gene_variant|MODIFIER|OS01G0115500|OS01G0115500|transcript|OS01T0115500-00|protein_coding||c.-1389G>T|||||1389|WARNING_TRANSCRIPT_NO_START_CODON,A|upstream_gene_variant|MODIFIER|OS01G0115600|OS01G0115600|transcript|OS01T0115600-01|protein_co…
chr01	842232	C	G	6020.73	0/0	0/0	0/0	0/0	1/1	0/0	0/0	1/1	0/0	0/0	0/0	0/0	1/1	0/0	0/0	0/0	0/0	0/0	0/0	0/0	0/0	0/0	0/0	0/0	G|missense_variant|MODERATE|OS01G0115566|OS01G0115566|transcript|OS01T0115566-00|protein_coding|1/1|c.526G>C|p.Val176Leu|526/756|526/756|176/251||,G|upstream_gene_variant|MODIFIER|OS01G0115500|OS01G0115500|transcript|OS01T0115500-00|protein_coding||c.-1404G>C|||||1404|WARNING_TRANSCRIPT_NO_START_CODON,G|upstream_gene_variant|MODIFIER|OS01G0115600|OS01G0115600|transcript|OS01T0115600-01|protein_co…
chr01	842247	T	C	5208.73	0/0	0/0	0/0	0/0	1/1	0/0	0/0	1/1	0/0	0/0	0/0	0/0	1/1	0/0	0/0	0/0	0/0	0/0	0/0	0/0	0/0	0/0	0/0	0/0	C|missense_variant|MODERATE|OS01G0115566|OS01G0115566|transcript|OS01T0115566-00|protein_coding|1/1|c.511A>G|p.Thr171Ala|511/756|511/756|171/251||,C|upstream_gene_variant|MODIFIER|OS01G0115500|OS01G0115500|transcript|OS01T0115500-00|protein_coding||c.-1419A>G|||||1419|WARNING_TRANSCRIPT_NO_START_CODON,C|upstream_gene_variant|MODIFIER|OS01G0115600|OS01G0115600|transcript|OS01T0115600-01|protein_co…
chr01	842269	C	G	6711.73	0/0	0/0	0/0	0/0	1|1	0/0	0/0	1|1	0/0	0/0	0/0	0/0	1|1	0/0	0/0	0/0	0/0	0/0	0/0	0/0	0/0	0/0	0/0	0/0	G|missense_variant|MODERATE|OS01G0115566|OS01G0115566|transcript|OS01T0115566-00|protein_coding|1/1|c.489G>C|p.Arg163Ser|489/756|489/756|163/251||,G|upstream_gene_variant|MODIFIER|OS01G0115500|OS01G0115500|transcript|OS01T0115500-00|protein_coding||c.-1441G>C|||||1441|WARNING_TRANSCRIPT_NO_START_CODON,G|upstream_gene_variant|MODIFIER|OS01G0115600|OS01G0115600|transcript|OS01T0115600-01|protein_co…
chr01	842276	T	A	6699.73	0/0	0/0	0/0	0/0	1|1	0/0	0/0	1|1	0/0	0/0	0/0	0/0	1|1	0/0	0/0	0/0	0/0	0/0	0/0	0/0	0/0	0/0	0/0	0/0	A|missense_variant|MODERATE|OS01G0115566|OS01G0115566|transcript|OS01T0115566-00|protein_coding|1/1|c.482A>T|p.Lys161Met|482/756|482/756|161/251||,A|upstream_gene_variant|MODIFIER|OS01G0115500|OS01G0115500|transcript|OS01T0115500-00|protein_coding||c.-1448A>T|||||1448|WARNING_TRANSCRIPT_NO_START_CODON,A|upstream_gene_variant|MODIFIER|OS01G0115600|OS01G0115600|transcript|OS01T0115600-01|protein_co…
chr01	842278	CTCA	C	6543.73	0/0	0/0	0/0	0/0	1|1	0/0	0/0	1|1	0/0	0/0	0/0	0/0	1|1	0/0	0/0	0/0	0/0	0/0	0/0	0/0	0/0	0/0	0/0	0/0	C|disruptive_inframe_deletion|MODERATE|OS01G0115566|OS01G0115566|transcript|OS01T0115566-00|protein_coding|1/1|c.477_479delTGA|p.Asn159_Glu160delinsLys|479/756|477/756|159/251||,C|upstream_gene_variant|MODIFIER|OS01G0115500|OS01G0115500|transcript|OS01T0115500-00|protein_coding||c.-1453_-1451delTGA|||||1451|WARNING_TRANSCRIPT_NO_START_CODON,C|upstream_gene_variant|MODIFIER|OS01G0115600|OS01G01156…
chr01	842325	T	A	5786.73	0/0	0/0	0/0	0/0	1/1	0/0	0/0	1/1	0/0	0/0	0/0	0/0	1/1	0/0	0/0	0/0	0/0	0/0	0/0	0/0	0/0	0/0	0/0	0/0	A|missense_variant|MODERATE|OS01G0115566|OS01G0115566|transcript|OS01T0115566-00|protein_coding|1/1|c.433A>T|p.Arg145Trp|433/756|433/756|145/251||,A|upstream_gene_variant|MODIFIER|OS01G0115500|OS01G0115500|transcript|OS01T0115500-00|protein_coding||c.-1497A>T|||||1497|WARNING_TRANSCRIPT_NO_START_CODON,A|upstream_gene_variant|MODIFIER|OS01G0115600|OS01G0115600|transcript|OS01T0115600-01|protein_co…
chr01	842347	G	GAA	6836.77	0/0	0/0	0/0	0/0	1|1	0/0	0/0	1|1	0/0	0/0	0/0	0/0	1|1	0/0	0/0	0/0	0/0	0/0	0/0	0/0	0/0	0/0	0/0	0/0	GAA|frameshift_variant|HIGH|OS01G0115566|OS01G0115566|transcript|OS01T0115566-00|protein_coding|1/1|c.410_411insTT|p.Glu138fs|410/756|410/756|137/251||,GAA|upstream_gene_variant|MODIFIER|OS01G0115500|OS01G0115500|transcript|OS01T0115500-00|protein_coding||c.-1520_-1519insTT|||||1520|WARNING_TRANSCRIPT_NO_START_CODON,GAA|upstream_gene_variant|MODIFIER|OS01G0115600|OS01G0115600|transcript|OS01T0115…
chr01	842349	T	TA	6925.77	0/0	0/0	0/0	0/0	1|1	0/0	0/0	1|1	0/0	0/0	0/0	0/0	1|1	0/0	0/0	0/0	0/0	0/0	0/0	0/0	0/0	0/0	0/0	0/0	TA|frameshift_variant|HIGH|OS01G0115566|OS01G0115566|transcript|OS01T0115566-00|protein_coding|1/1|c.408dupT|p.Ile137fs|408/756|408/756|136/251||,TA|upstream_gene_variant|MODIFIER|OS01G0115500|OS01G0115500|transcript|OS01T0115500-00|protein_coding||c.-1522dupT|||||1522|WARNING_TRANSCRIPT_NO_START_CODON,TA|upstream_gene_variant|MODIFIER|OS01G0115600|OS01G0115600|transcript|OS01T0115600-01|protein_…
chr01	842355	T	A	6873.73	0/0	0/0	0/0	0/0	1|1	0/0	0/0	1|1	0/0	0/0	0/0	0/0	1|1	0/0	0/0	0/0	0/0	0/0	0/0	0/0	0/0	0/0	0/0	0/0	A|missense_variant|MODERATE|OS01G0115566|OS01G0115566|transcript|OS01T0115566-00|protein_coding|1/1|c.403A>T|p.Ile135Phe|403/756|403/756|135/251||,A|upstream_gene_variant|MODIFIER|OS01G0115500|OS01G0115500|transcript|OS01T0115500-00|protein_coding||c.-1527A>T|||||1527|WARNING_TRANSCRIPT_NO_START_CODON,A|upstream_gene_variant|MODIFIER|OS01G0115600|OS01G0115600|transcript|OS01T0115600-01|protein_co…
chr01	842357	G	C	6873.73	0/0	0/0	0/0	0/0	1|1	0/0	0/0	1|1	0/0	0/0	0/0	0/0	1|1	0/0	0/0	0/0	0/0	0/0	0/0	0/0	0/0	0/0	0/0	0/0	C|missense_variant|MODERATE|OS01G0115566|OS01G0115566|transcript|OS01T0115566-00|protein_coding|1/1|c.401C>G|p.Thr134Ser|401/756|401/756|134/251||,C|upstream_gene_variant|MODIFIER|OS01G0115500|OS01G0115500|transcript|OS01T0115500-00|protein_coding||c.-1529C>G|||||1529|WARNING_TRANSCRIPT_NO_START_CODON,C|upstream_gene_variant|MODIFIER|OS01G0115600|OS01G0115600|transcript|OS01T0115600-01|protein_co…
chr01	842363	CAACCA	C	6921.73	0/0	0/0	0/0	0/0	1|1	0/0	0/0	1|1	0/0	0/0	0/0	0/0	1|1	0/0	0/0	0/0	0/0	0/0	0/0	0/0	0/0	0/0	0/0	0/0	C|frameshift_variant|HIGH|OS01G0115566|OS01G0115566|transcript|OS01T0115566-00|protein_coding|1/1|c.390_394delTGGTT|p.Gly131fs|394/756|390/756|130/251||,C|upstream_gene_variant|MODIFIER|OS01G0115500|OS01G0115500|transcript|OS01T0115500-00|protein_coding||c.-1540_-1536delTGGTT|||||1536|WARNING_TRANSCRIPT_NO_START_CODON,C|upstream_gene_variant|MODIFIER|OS01G0115600|OS01G0115600|transcript|OS01T0115…
chr01	842370	TATTCA	T	6607.73	0/0	0/0	0/0	0/0	1|1	0/0	0/0	1|1	0/0	0/0	0/0	0/0	1|1	0/0	0/0	0/0	0/0	0/0	0/0	0/0	0/0	0/0	0/0	0/0	T|frameshift_variant|HIGH|OS01G0115566|OS01G0115566|transcript|OS01T0115566-00|protein_coding|1/1|c.383_387delTGAAT|p.Leu128fs|387/756|383/756|128/251||,T|upstream_gene_variant|MODIFIER|OS01G0115500|OS01G0115500|transcript|OS01T0115500-00|protein_coding||c.-1547_-1543delTGAAT|||||1543|WARNING_TRANSCRIPT_NO_START_CODON,T|upstream_gene_variant|MODIFIER|OS01G0115600|OS01G0115600|transcript|OS01T0115…
chr01	842387	G	GGACCAGTAAT	7582.77	0/0	0/0	0/0	0/0	1/1	0/0	0/0	1/1	0/0	0/0	0/0	0/0	1/1	0/0	0/0	0/0	0/0	0/0	0/0	0/0	0/0	0/0	0/0	0/0	GGACCAGTAAT|frameshift_variant|HIGH|OS01G0115566|OS01G0115566|transcript|OS01T0115566-00|protein_coding|1/1|c.370_371insATTACTGGTC|p.Pro124fs|370/756|370/756|124/251||,GGACCAGTAAT|upstream_gene_variant|MODIFIER|OS01G0115500|OS01G0115500|transcript|OS01T0115500-00|protein_coding||c.-1560_-1559insATTACTGGTC|||||1560|WARNING_TRANSCRIPT_NO_START_CODON,GGACCAGTAAT|upstream_gene_variant|MODIFIER|OS01G0…
chr01	842553	T	C	5956.73	0/0	0/0	0/0	0/0	1|1	0/0	0/0	1|1	0/0	0/0	0/0	0/0	1|1	0/0	0/0	0/0	0/0	0/0	0/0	0/0	0/0	0/0	0/0	0/0	C|missense_variant|MODERATE|OS01G0115566|OS01G0115566|transcript|OS01T0115566-00|protein_coding|1/1|c.205A>G|p.Thr69Ala|205/756|205/756|69/251||,C|upstream_gene_variant|MODIFIER|OS01G0115500|OS01G0115500|transcript|OS01T0115500-00|protein_coding||c.-1725A>G|||||1725|WARNING_TRANSCRIPT_NO_START_CODON,C|upstream_gene_variant|MODIFIER|OS01G0115600|OS01G0115600|transcript|OS01T0115600-01|protein_codi…
chr01	842564	C	T	5292.73	0/0	0/0	0/0	0/0	1|1	0/0	0/0	1|1	0/0	0/0	0/0	0/0	1|1	0/0	0/0	0/0	0/0	0/0	0/0	0/0	0/0	0/0	0/0	0/0	T|missense_variant|MODERATE|OS01G0115566|OS01G0115566|transcript|OS01T0115566-00|protein_coding|1/1|c.194G>A|p.Gly65Glu|194/756|194/756|65/251||,T|upstream_gene_variant|MODIFIER|OS01G0115500|OS01G0115500|transcript|OS01T0115500-00|protein_coding||c.-1736G>A|||||1736|WARNING_TRANSCRIPT_NO_START_CODON,T|upstream_gene_variant|MODIFIER|OS01G0115600|OS01G0115600|transcript|OS01T0115600-01|protein_codi…
chr01	843604	C	A	6475.73	0/0	0/0	0/0	0/0	1/1	0/0	0/0	1/1	0/0	0/0	0/0	0/0	1/1	0/0	0/0	0/0	0/0	0/0	0/0	0/0	0/0	0/0	0/0	0/0	A|missense_variant|MODERATE|OS01G0115600|OS01G0115600|transcript|OS01T0115600-01|protein_coding|1/3|c.62C>A|p.Ser21Tyr|75/2004|62/1866|21/621||,A|upstream_gene_variant|MODIFIER|OS01G0115566|OS01G0115566|transcript|OS01T0115566-00|protein_coding||c.-847G>T|||||847|,A|downstream_gene_variant|MODIFIER|OS01G0115533|OS01G0115533|transcript|OS01T0115533-00|lincRNA||n.*861C>A|||||861|
chr01	853979	A	G	9545.73	0/0	0/0	0/0	0/0	1|1	0/0	0/0	1|1	0/0	0/0	0/0	0/0	1|1	0/0	0/0	0/0	0/0	0/0	0/0	0/0	0/0	0/0	0/0	0/0	G|missense_variant|MODERATE|OS01G0115700|OS01G0115700|transcript|OS01T0115700-00|protein_coding|1/2|c.590T>C|p.Leu197Pro|590/1887|590/1887|197/628||,G|5_prime_UTR_variant|MODIFIER|OS01G0115725|OS01G0115725|transcript|OS01T0115725-00|protein_coding|2/2|c.-245A>G|||||245|
chr01	853980	G	A	9545.73	0/0	0/0	0/0	0/0	1|1	0/0	0/0	1|1	0/0	0/0	0/0	0/0	1|1	0/0	0/0	0/0	0/0	0/0	0/0	0/0	0/0	0/0	0/0	0/0	A|missense_variant|MODERATE|OS01G0115700|OS01G0115700|transcript|OS01T0115700-00|protein_coding|1/2|c.589C>T|p.Leu197Phe|589/1887|589/1887|197/628||,A|5_prime_UTR_variant|MODIFIER|OS01G0115725|OS01G0115725|transcript|OS01T0115725-00|protein_coding|2/2|c.-244G>A|||||244|
chr01	858021	G	T	6924.73	0/0	0/0	0/0	0/0	1/1	0/0	0/0	1/1	0/0	0/0	0/0	0/0	1/1	0/0	0/0	0/0	0/0	0/0	0/0	0/0	0/0	0/0	0/0	0/0	T|stop_gained|HIGH|OS01G0115750|OS01G0115750|transcript|OS01T0115750-00|protein_coding|2/2|c.1973C>A|p.Ser658*|1973/2097|1973/2037|658/678||,T|non_coding_transcript_exon_variant|MODIFIER|OS01G0115752|OS01G0115752|transcript|OS01T0115752-00|lincRNA|1/2|n.117G>T||||||
chr01	858753	C	A	7473.73	0/0	0/0	0/0	0/0	1/1	0/0	0/0	1/1	0/0	0/0	0/0	0/0	1/1	0/0	0/0	0/0	0/0	0/0	0/0	0/0	0/0	0/0	0/0	0/0	A|missense_variant|MODERATE|OS01G0115750|OS01G0115750|transcript|OS01T0115750-00|protein_coding|2/2|c.1241G>T|p.Arg414Met|1241/2097|1241/2037|414/678||,A|non_coding_transcript_exon_variant|MODIFIER|OS01G0115752|OS01G0115752|transcript|OS01T0115752-00|lincRNA|1/2|n.849C>A||||||
chr01	859186	C	T	3869.73	0/0	0/0	0/0	0/0	1/1	0/0	0/0	1/1	0/0	0/0	0/0	0/0	1/1	0/0	0/0	0/0	0/0	0/0	0/0	0/0	0/0	0/0	0/0	0/0	T|missense_variant|MODERATE|OS01G0115750|OS01G0115750|transcript|OS01T0115750-00|protein_coding|2/2|c.808G>A|p.Ala270Thr|808/2097|808/2037|270/678||,T|intron_variant|MODIFIER|OS01G0115752|OS01G0115752|transcript|OS01T0115752-00|lincRNA|1/1|n.1196+86C>T||||||
chr01	859844	A	C	7778.73	0/0	0/0	0/0	0/0	1/1	0/0	0/0	1/1	0/0	0/0	0/0	0/0	1/1	0/0	0/0	0/0	0/0	0/0	0/0	0/0	0/0	0/0	0/0	0/0	C|missense_variant|MODERATE|OS01G0115750|OS01G0115750|transcript|OS01T0115750-00|protein_coding|1/2|c.740T>G|p.Val247Gly|740/2097|740/2037|247/678||,C|non_coding_transcript_exon_variant|MODIFIER|OS01G0115752|OS01G0115752|transcript|OS01T0115752-00|lincRNA|2/2|n.1454A>C||||||
chr01	860093	A	G	8643.73	0/0	0/0	0/0	0/0	1/1	0/0	0/0	1/1	0/0	0/0	0/0	0/0	1/1	0/0	0/0	0/0	0/0	0/0	0/0	0/0	0/0	0/0	0/0	0/0	G|missense_variant|MODERATE|OS01G0115750|OS01G0115750|transcript|OS01T0115750-00|protein_coding|1/2|c.491T>C|p.Ile164Thr|491/2097|491/2037|164/678||,G|non_coding_transcript_exon_variant|MODIFIER|OS01G0115752|OS01G0115752|transcript|OS01T0115752-00|lincRNA|2/2|n.1703A>G||||||
chr01	863984	G	A	8029.73	0/0	0/0	0/0	0/0	1/1	0/0	0/0	1/1	0/0	0/0	0/0	0/0	1/1	0/0	0/0	0/0	0/0	0/0	0/0	0/0	0/0	0/0	0/0	0/0	A|missense_variant|MODERATE|OS01G0115950|OS01G0115950|transcript|OS01T0115950-00|protein_coding|1/2|c.169G>A|p.Asp57Asn|870/2007|169/447|57/148||,A|3_prime_UTR_variant|MODIFIER|OS01G0115800|OS01G0115800|transcript|OS01T0115800-01|protein_coding|3/3|c.*137C>T|||||137|,A|upstream_gene_variant|MODIFIER|OS01G0115900|OS01G0115900|transcript|OS01T0115900-00|protein_coding||c.-1982G>A|||||1954|,A|downst…
chr01	864239	C	A	8065.73	0/0	0/0	0/0	0/0	1/1	0/0	0/0	1/1	0/0	0/0	0/0	0/0	1/1	0/0	0/0	0/0	0/0	0/0	0/0	0/0	0/0	0/0	0/0	0/0	A|missense_variant|MODERATE|OS01G0115800|OS01G0115800|transcript|OS01T0115800-01|protein_coding|2/3|c.867G>T|p.Leu289Phe|908/2483|867/900|289/299||,A|missense_variant|MODERATE|OS01G0115950|OS01G0115950|transcript|OS01T0115950-00|protein_coding|1/2|c.424C>A|p.Gln142Lys|1125/2007|424/447|142/148||,A|upstream_gene_variant|MODIFIER|OS01G0115900|OS01G0115900|transcript|OS01T0115900-00|protein_coding||…
chr01	864321	A	T	5457.73	0/0	0/0	0/0	0/0	1/1	0/0	0/0	1/1	0/0	0/0	0/0	0/0	1/1	0/0	0/0	0/0	0/0	0/0	0/0	0/0	0/0	0/0	0/0	0/0	T|missense_variant|MODERATE|OS01G0115800|OS01G0115800|transcript|OS01T0115800-01|protein_coding|2/3|c.785T>A|p.Leu262Gln|826/2483|785/900|262/299||,T|3_prime_UTR_variant|MODIFIER|OS01G0115950|OS01G0115950|transcript|OS01T0115950-00|protein_coding|1/2|c.*59A>T|||||59|,T|upstream_gene_variant|MODIFIER|OS01G0115900|OS01G0115900|transcript|OS01T0115900-00|protein_coding||c.-1645A>T|||||1617|,T|downst…
chr01	864521	TTCCAGTACG	T	8456.73	0/0	0/0	0/0	0/0	1/1	0/0	0/0	1/1	0/0	0/0	0/0	0/0	1/1	0/0	0/0	0/0	0/0	0/0	0/0	0/0	0/0	0/0	0/0	0/0	T|conservative_inframe_deletion|MODERATE|OS01G0115800|OS01G0115800|transcript|OS01T0115800-01|protein_coding|1/3|c.679_687delCGTACTGGA|p.Arg227_Gly229del|728/2483|679/900|227/299||,T|3_prime_UTR_variant|MODIFIER|OS01G0115950|OS01G0115950|transcript|OS01T0115950-00|protein_coding|2/2|c.*198_*206delTCCAGTACG|||||260|,T|upstream_gene_variant|MODIFIER|OS01G0115900|OS01G0115900|transcript|OS01T0115900…
chr01	864695	A	G	7526.73	0/0	0/0	0/0	0/0	1|1	0/0	0/0	1|1	0/0	0/0	0/0	0/0	1|1	0/0	0/0	0/0	0/0	0/0	0/0	0/0	0/0	0/0	0/0	0/0	G|missense_variant|MODERATE|OS01G0115800|OS01G0115800|transcript|OS01T0115800-01|protein_coding|1/3|c.514T>C|p.Ser172Pro|555/2483|514/900|172/299||,G|3_prime_UTR_variant|MODIFIER|OS01G0115950|OS01G0115950|transcript|OS01T0115950-00|protein_coding|2/2|c.*371A>G|||||433|,G|upstream_gene_variant|MODIFIER|OS01G0115900|OS01G0115900|transcript|OS01T0115900-00|protein_coding||c.-1271A>G|||||1243|,G|down…
chr01	864696	T	A	7526.73	0/0	0/0	0/0	0/0	1|1	0/0	0/0	1|1	0/0	0/0	0/0	0/0	1|1	0/0	0/0	0/0	0/0	0/0	0/0	0/0	0/0	0/0	0/0	0/0	A|missense_variant|MODERATE|OS01G0115800|OS01G0115800|transcript|OS01T0115800-01|protein_coding|1/3|c.513A>T|p.Lys171Asn|554/2483|513/900|171/299||,A|3_prime_UTR_variant|MODIFIER|OS01G0115950|OS01G0115950|transcript|OS01T0115950-00|protein_coding|2/2|c.*372T>A|||||434|,A|upstream_gene_variant|MODIFIER|OS01G0115900|OS01G0115900|transcript|OS01T0115900-00|protein_coding||c.-1270T>A|||||1242|,A|down…
chr01	873092	G	T	7948.73	0/0	0/0	0/0	0/0	1/1	0/0	0/0	1/1	0/0	0/0	0/0	0/0	1/1	0/0	0/0	0/0	0/0	0/0	0/0	0/0	0/0	0/0	0/0	0/0	T|missense_variant|MODERATE|OS01G0116000|OS01G0116000|transcript|OS01T0116000-00|protein_coding|3/3|c.1444C>A|p.Leu482Ile|1444/2078|1444/2055|482/684||,T|5_prime_UTR_variant|MODIFIER|OS01G0116101|OS01G0116101|transcript|OS01T0116101-00|protein_coding|1/2|c.-199G>T|||||199|,T|upstream_gene_variant|MODIFIER|EPlOSAG00000009771|EPlOSAG00000009771|transcript|EPlOSAT00000011159|lincRNA||n.-1676C>A|||||…
chr01	873514	C	T	7407.73	0/0	0/0	0/0	0/0	1/1	0/0	0/0	1/1	0/0	0/0	0/0	0/0	1/1	0/0	0/0	0/0	0/0	0/0	0/0	0/0	0/0	0/0	0/0	0/0	T|missense_variant|MODERATE|OS01G0116000|OS01G0116000|transcript|OS01T0116000-00|protein_coding|3/3|c.1022G>A|p.Arg341Gln|1022/2078|1022/2055|341/684||,T|missense_variant|MODERATE|OS01G0116101|OS01G0116101|transcript|OS01T0116101-00|protein_coding|1/2|c.224C>T|p.Ser75Leu|1006/2075|224/381|75/126||,T|upstream_gene_variant|MODIFIER|EPlOSAG00000016578|EPlOSAG00000016578|transcript|EPlOSAT00000017966…
chr01	874522	G	A	7865.73	0/0	0/0	0/0	0/0	1/1	0/0	0/0	1/1	0/0	0/0	0/0	0/0	1/1	0/0	0/0	0/0	0/0	0/0	0/0	0/0	0/0	0/0	0/0	0/0	A|missense_variant|MODERATE|OS01G0116000|OS01G0116000|transcript|OS01T0116000-00|protein_coding|1/3|c.296C>T|p.Thr99Ile|296/2078|296/2055|99/684||,A|3_prime_UTR_variant|MODIFIER|OS01G0116101|OS01G0116101|transcript|OS01T0116101-00|protein_coding|2/2|c.*737G>A|||||851|
chr01	913573	T	G	6163.73	0/0	0/0	0/0	0/0	1/1	0/0	0/0	1/1	0/0	0/0	0/0	0/0	1/1	0/0	0/0	0/0	0/0	0/0	0/0	0/0	0/0	0/0	0/0	0/0	G|missense_variant|MODERATE|OS01G0116200|OS01G0116200|transcript|OS01T0116200-01|protein_coding|1/3|c.647A>C|p.Glu216Ala|674/2282|647/2133|216/710||,G|3_prime_UTR_variant|MODIFIER|OS01G0116250|OS01G0116250|transcript|OS01T0116250-00|protein_coding|2/2|c.*1078T>G|||||1268|
chr01	913662	G	GATAGATGGTGCTCCAAACGATGGGAGC	6794.77	0/0	0/0	0/0	0/0	1/1	0/0	0/0	1/1	0/0	0/0	0/0	0/0	1/1	0/0	0/0	0/0	0/0	0/0	0/0	0/0	0/0	0/0	0/0	0/0	GATAGATGGTGCTCCAAACGATGGGAGC|disruptive_inframe_insertion|MODERATE|OS01G0116200|OS01G0116200|transcript|OS01T0116200-01|protein_coding|1/3|c.531_557dupGCTCCCATCGTTTGGAGCACCATCTAT|p.Met177_Ser185dup|584/2282|557/2133|186/710||,GATAGATGGTGCTCCAAACGATGGGAGC|3_prime_UTR_variant|MODIFIER|OS01G0116250|OS01G0116250|transcript|OS01T0116250-00|protein_coding|2/2|c.*1171_*1197dupGATGGTGCTCCAAACGATGGGAGCATA…
chr01	916549	C	A	5868.73	0/0	0/0	0/0	0/0	1/1	0/0	0/0	1/1	0/0	0/0	0/0	0/0	1/1	0/0	0/0	0/0	0/0	0/0	0/0	0/0	0/0	0/0	0/0	0/0	A|missense_variant|MODERATE|OS01G0116300|OS01G0116300|transcript|OS01T0116300-01|protein_coding|1/1|c.911C>A|p.Pro304Gln|945/2032|911/933|304/310||,A|non_coding_transcript_exon_variant|MODIFIER|EPlOSAG00000039296|EPlOSAG00000039296|transcript|EPlOSAT00000040684|lincRNA|1/1|n.14C>A||||||,A|non_coding_transcript_exon_variant|MODIFIER|EPlOSAG00000040747|EPlOSAG00000040747|transcript|EPlOSAT000000421…
chr01	916567	T	C	6038.73	0/0	0/0	0/0	0/0	1/1	0/0	0/0	1/1	0/0	0/0	0/0	0/0	1/1	0/0	0/0	0/0	0/0	0/0	0/0	0/0	0/0	0/0	0/0	0/0	C|missense_variant|MODERATE|OS01G0116300|OS01G0116300|transcript|OS01T0116300-01|protein_coding|1/1|c.929T>C|p.Ile310Thr|963/2032|929/933|310/310||,C|non_coding_transcript_exon_variant|MODIFIER|EPlOSAG00000039296|EPlOSAG00000039296|transcript|EPlOSAT00000040684|lincRNA|1/1|n.32T>C||||||,C|non_coding_transcript_exon_variant|MODIFIER|EPlOSAG00000040747|EPlOSAG00000040747|transcript|EPlOSAT000000421…
chr01	921661	C	T	5941.73	0/0	0/0	0/0	0/0	1/1	0/0	0/0	1/1	0/0	0/0	0/0	0/0	1/1	0/0	0/0	0/0	0/0	0/0	0/0	0/0	0/0	0/0	0/0	0/0	T|missense_variant|MODERATE|OS01G0116650|OS01G0116650|transcript|OS01T0116650-00|protein_coding|1/2|c.80C>T|p.Ser27Phe|366/2159|80/276|27/91||,T|synonymous_variant|LOW|OS01G0116400|OS01G0116400|transcript|OS01T0116400-01|protein_coding|3/3|c.1644G>A|p.Gly548Gly|1692/2275|1644/2034|548/677||
chr01	922027	T	C	6550.73	0/0	0/0	0/0	0/0	1/1	0/0	0/0	1/1	0/0	0/0	0/0	0/0	1/1	0/0	0/0	0/0	0/0	0/0	0/0	0/0	0/0	0/0	0/0	0/0	C|missense_variant|MODERATE|OS01G0116400|OS01G0116400|transcript|OS01T0116400-01|protein_coding|3/3|c.1278A>G|p.Ile426Met|1326/2275|1278/2034|426/677||,C|3_prime_UTR_variant|MODIFIER|OS01G0116650|OS01G0116650|transcript|OS01T0116650-00|protein_coding|1/2|c.*170T>C|||||170|
chr01	922226	T	A	7105.73	0/0	0/0	0/0	0/0	1/1	0/0	0/0	1/1	0/0	0/0	0/0	0/0	1/1	0/0	0/0	0/0	0/0	0/0	0/0	0/0	0/0	0/0	0/0	0/0	A|missense_variant|MODERATE|OS01G0116400|OS01G0116400|transcript|OS01T0116400-01|protein_coding|3/3|c.1079A>T|p.Tyr360Phe|1127/2275|1079/2034|360/677||,A|3_prime_UTR_variant|MODIFIER|OS01G0116650|OS01G0116650|transcript|OS01T0116650-00|protein_coding|1/2|c.*369T>A|||||369|
chr01	922627	T	C	6439.73	0/0	0/0	0/0	0/0	1/1	0/0	0/0	1/1	0/0	0/0	0/0	0/0	1/1	0/0	0/0	0/0	0/0	0/0	0/0	0/0	0/0	0/0	0/0	0/0	C|missense_variant|MODERATE|OS01G0116400|OS01G0116400|transcript|OS01T0116400-01|protein_coding|2/3|c.805A>G|p.Asn269Asp|853/2275|805/2034|269/677||,C|3_prime_UTR_variant|MODIFIER|OS01G0116650|OS01G0116650|transcript|OS01T0116650-00|protein_coding|1/2|c.*770T>C|||||770|,C|upstream_gene_variant|MODIFIER|OS01G0116900|OS01G0116900|transcript|OS01T0116900-00|protein_coding||c.-1824T>C|||||1824|
chr01	922674	T	C	7534.73	0/0	0/0	0/0	0/0	1/1	0/0	0/0	1/1	0/0	0/0	0/0	0/0	1/1	0/0	0/0	0/0	0/0	0/0	0/0	0/0	0/0	0/0	0/0	0/0	C|missense_variant|MODERATE|OS01G0116400|OS01G0116400|transcript|OS01T0116400-01|protein_coding|2/3|c.758A>G|p.Asn253Ser|806/2275|758/2034|253/677||,C|3_prime_UTR_variant|MODIFIER|OS01G0116650|OS01G0116650|transcript|OS01T0116650-00|protein_coding|1/2|c.*817T>C|||||817|,C|upstream_gene_variant|MODIFIER|OS01G0116900|OS01G0116900|transcript|OS01T0116900-00|protein_coding||c.-1777T>C|||||1777|
chr01	930115	G	C	5142.73	0/0	0/0	0/0	0/0	1/1	0/0	0/0	1/1	0/0	0/0	0/0	0/0	1/1	0/0	0/0	0/0	0/0	0/0	0/0	0/0	0/0	0/0	0/0	0/0	C|missense_variant|MODERATE|OS01G0116600|OS01G0116600|transcript|OS01T0116600-01|protein_coding|11/11|c.2014C>G|p.Gln672Glu|2014/2245|2014/2022|672/673||WARNING_TRANSCRIPT_NO_START_CODON,C|missense_variant|MODERATE|OS01G0116600|OS01G0116600|transcript|OS01T0116600-02|protein_coding|7/7|c.1378C>G|p.Gln460Glu|1380/1611|1378/1386|460/461||WARNING_TRANSCRIPT_NO_START_CODON,C|intron_variant|MODIFIER|O…
chr01	930166	C	A	5955.73	0/0	0/0	0/0	0/0	1/1	0/0	0/0	1/1	0/0	0/0	0/0	0/0	1/1	0/0	0/0	0/0	0/0	0/0	0/0	0/0	0/0	0/0	0/0	0/0	A|missense_variant|MODERATE|OS01G0116600|OS01G0116600|transcript|OS01T0116600-01|protein_coding|11/11|c.1963G>T|p.Gly655Cys|1963/2245|1963/2022|655/673||WARNING_TRANSCRIPT_NO_START_CODON,A|missense_variant|MODERATE|OS01G0116600|OS01G0116600|transcript|OS01T0116600-02|protein_coding|7/7|c.1327G>T|p.Gly443Cys|1329/1611|1327/1386|443/461||WARNING_TRANSCRIPT_NO_START_CODON,A|intron_variant|MODIFIER|O…
chr01	933150	T	A	5548.73	0/0	0/0	0/0	0/0	1/1	0/0	0/0	1/1	0/0	0/0	0/0	0/0	1/1	0/0	0/0	0/0	0/0	0/0	0/0	0/0	0/0	0/0	0/0	0/0	A|missense_variant|MODERATE|OS01G0116600|OS01G0116600|transcript|OS01T0116600-01|protein_coding|3/11|c.394A>T|p.Thr132Ser|394/2245|394/2022|132/673||WARNING_TRANSCRIPT_NO_START_CODON,A|upstream_gene_variant|MODIFIER|OS01G0116600|OS01G0116600|transcript|OS01T0116600-02|protein_coding||c.-784A>T|||||782|WARNING_TRANSCRIPT_NO_START_CODON,A|intron_variant|MODIFIER|OS01G0116900|OS01G0116900|transcript…
chr01	934333	TTCATCATAC	T	3965.73	0/0	0/0	0/0	0/0	1|1	0/0	0/0	1|1	0/0	0/0	0/0	0/0	1|1	0/0	0/0	0/0	0/0	0/0	0/0	0/0	0/0	0/0	0/0	0/0	T|disruptive_inframe_deletion|MODERATE|OS01G0116600|OS01G0116600|transcript|OS01T0116600-01|protein_coding|1/11|c.117_125delGTATGATGA|p.Tyr40_Glu42del|125/2245|117/2022|39/673||WARNING_TRANSCRIPT_NO_START_CODON,T|upstream_gene_variant|MODIFIER|OS01G0116901|OS01G0116901|transcript|OS01T0116901-00|protein_coding||c.-1323_-1315delTCATCATAC|||||1284|,T|upstream_gene_variant|MODIFIER|OS01G0116600|OS01…
chr01	934359	T	C	4893.73	0/0	0/0	0/0	0/0	1|1	0/0	0/0	1|1	0/0	0/0	0/0	0/0	1|1	0/0	0/0	0/0	0/0	0/0	0/0	0/0	0/0	0/0	0/0	0/0	C|missense_variant|MODERATE|OS01G0116600|OS01G0116600|transcript|OS01T0116600-01|protein_coding|1/11|c.100A>G|p.Asn34Asp|100/2245|100/2022|34/673||WARNING_TRANSCRIPT_NO_START_CODON,C|upstream_gene_variant|MODIFIER|OS01G0116901|OS01G0116901|transcript|OS01T0116901-00|protein_coding||c.-1298T>C|||||1259|,C|upstream_gene_variant|MODIFIER|OS01G0116600|OS01G0116600|transcript|OS01T0116600-02|protein_c…
chr01	934429	TG	T	455.06	0/0	0/0	0/0	0/0	0/0	0/0	0/0	0/0	0/0	0/0	0/0	0/0	1/1	0/0	0/0	0/0	0/0	0/0	0/0	0/0	0/0	0/0	0/0	0/0	T|frameshift_variant|HIGH|OS01G0116600|OS01G0116600|transcript|OS01T0116600-01|protein_coding|1/11|c.29delC|p.Pro10fs|29/2245|29/2022|10/673||WARNING_TRANSCRIPT_NO_START_CODON,T|upstream_gene_variant|MODIFIER|OS01G0116901|OS01G0116901|transcript|OS01T0116901-00|protein_coding||c.-1227delG|||||1188|,T|downstream_gene_variant|MODIFIER|OS01G0116800|OS01G0116800|transcript|OS01T0116800-00|protein_cod…
chr01	935988	A	G	6547.73	0/0	0/0	0/0	0/0	1|1	0/0	0/0	1|1	0/0	0/0	0/0	0/0	1|1	0/0	0/0	0/0	0/0	0/0	0/0	0/0	0/0	0/0	0/0	0/0	G|missense_variant|MODERATE|OS01G0116901|OS01G0116901|transcript|OS01T0116901-00|protein_coding|1/2|c.332A>G|p.Gln111Arg|371/2026|332/525|111/174||,G|synonymous_variant|LOW|OS01G0116800|OS01G0116800|transcript|OS01T0116800-00|protein_coding|1/1|c.717T>C|p.Phe239Phe|717/1131|717/1131|239/376||,G|upstream_gene_variant|MODIFIER|OS01G0116600|OS01G0116600|transcript|OS01T0116600-01|protein_coding||c.-…
chr01	935994	A	G	6595.73	0/0	0/0	0/0	0/0	1|1	0/0	0/0	1|1	0/0	0/0	0/0	0/0	1|1	0/0	0/0	0/0	0/0	0/0	0/0	0/0	0/0	0/0	0/0	0/0	G|missense_variant|MODERATE|OS01G0116901|OS01G0116901|transcript|OS01T0116901-00|protein_coding|1/2|c.338A>G|p.Tyr113Cys|377/2026|338/525|113/174||,G|synonymous_variant|LOW|OS01G0116800|OS01G0116800|transcript|OS01T0116800-00|protein_coding|1/1|c.711T>C|p.Tyr237Tyr|711/1131|711/1131|237/376||,G|upstream_gene_variant|MODIFIER|OS01G0116600|OS01G0116600|transcript|OS01T0116600-01|protein_coding||c.-…
chr01	935997	C	A	6410.73	0/0	0/0	0/0	0/0	1|1	0/0	0/0	1|1	0/0	0/0	0/0	0/0	1|1	0/0	0/0	0/0	0/0	0/0	0/0	0/0	0/0	0/0	0/0	0/0	A|missense_variant|MODERATE|OS01G0116901|OS01G0116901|transcript|OS01T0116901-00|protein_coding|1/2|c.341C>A|p.Thr114Lys|380/2026|341/525|114/174||,A|synonymous_variant|LOW|OS01G0116800|OS01G0116800|transcript|OS01T0116800-00|protein_coding|1/1|c.708G>T|p.Val236Val|708/1131|708/1131|236/376||,A|upstream_gene_variant|MODIFIER|OS01G0116600|OS01G0116600|transcript|OS01T0116600-01|protein_coding||c.-…
chr01	955947	C	T	8104.73	0/0	0/0	0/0	0/0	1/1	0/0	0/0	1/1	0/0	0/0	0/0	0/0	1/1	0/0	0/0	0/0	0/0	0/0	0/0	0/0	0/0	0/0	0/0	0/0	T|missense_variant|MODERATE|OS01G0116900|OS01G0116900|transcript|OS01T0116900-00|protein_coding|3/3|c.856C>T|p.Arg286Trp|856/1548|856/1548|286/515||,T|downstream_gene_variant|MODIFIER|OS01G0117000|OS01G0117000|transcript|OS01T0117000-00|protein_coding||c.*1960G>A|||||1960|
chr01	958597	T	A	6811.73	0/0	0/0	0/0	0/0	1/1	0/0	0/0	1/1	0/0	0/0	0/0	0/0	1/1	0/0	0/0	0/0	0/0	0/0	0/0	0/0	0/0	0/0	0/0	0/0	A|missense_variant|MODERATE|OS01G0117000|OS01G0117000|transcript|OS01T0117000-00|protein_coding|4/5|c.1721A>T|p.Glu574Val|1721/2223|1721/2223|574/740||,A|downstream_gene_variant|MODIFIER|OS01G0116900|OS01G0116900|transcript|OS01T0116900-00|protein_coding||c.*1958T>A|||||1958|,A|intron_variant|MODIFIER|OS01G0117025|OS01G0117025|transcript|OS01T0117025-00|protein_coding|1/2|c.228-53T>A||||||
chr01	959130	T	A	8416.73	0/0	0/0	0/0	0/0	1/1	0/0	0/0	1/1	0/0	0/0	0/0	0/0	1/1	0/0	0/0	0/0	0/0	0/0	0/0	0/0	0/0	0/0	0/0	0/0	A|missense_variant|MODERATE|OS01G0117000|OS01G0117000|transcript|OS01T0117000-00|protein_coding|3/5|c.1279A>T|p.Thr427Ser|1279/2223|1279/2223|427/740||,A|3_prime_UTR_variant|MODIFIER|OS01G0117025|OS01G0117025|transcript|OS01T0117025-00|protein_coding|2/3|c.*450T>A|||||450|
chr01	960147	C	T	7255.73	0/0	0/0	0/0	0/0	1/1	0/0	0/0	1/1	0/0	0/0	0/0	0/0	1/1	0/0	0/0	0/0	0/0	0/0	0/0	0/0	0/0	0/0	0/0	0/0	T|missense_variant|MODERATE|OS01G0117000|OS01G0117000|transcript|OS01T0117000-00|protein_coding|1/5|c.480G>A|p.Met160Ile|480/2223|480/2223|160/740||,T|3_prime_UTR_variant|MODIFIER|OS01G0117025|OS01G0117025|transcript|OS01T0117025-00|protein_coding|3/3|c.*1339C>T|||||1467|,T|upstream_gene_variant|MODIFIER|OS01G0117100|OS01G0117100|transcript|OS01T0117100-00|protein_coding||c.-3910C>T|||||1652|WARN…
chr01	960534	GGAA	G	6485.73	0/0	0/0	0/0	0/0	1/1	0/0	0/0	1/1	0/0	0/0	0/0	0/0	1/1	0/0	0/0	0/0	0/0	0/0	0/0	0/0	0/0	0/0	0/0	0/0	G|disruptive_inframe_deletion|MODERATE|OS01G0117000|OS01G0117000|transcript|OS01T0117000-00|protein_coding|1/5|c.90_92delTTC|p.Ser31del|92/2223|90/2223|30/740||,G|3_prime_UTR_variant|MODIFIER|OS01G0117025|OS01G0117025|transcript|OS01T0117025-00|protein_coding|3/3|c.*1728_*1730delAAG|||||1856|INFO_REALIGN_3_PRIME,G|upstream_gene_variant|MODIFIER|OS01G0117100|OS01G0117100|transcript|OS01T0117100-00…
chr01	964334	T	C	5186.73	0/0	0/0	0/0	0/0	1/1	0/0	0/0	1/1	0/0	0/0	0/0	0/0	1/1	0/0	0/0	0/0	0/0	0/0	0/0	0/0	0/0	0/0	0/0	0/0	C|missense_variant|MODERATE|OS01G0117100|OS01G0117100|transcript|OS01T0117100-00|protein_coding|3/3|c.278T>C|p.Val93Ala|650/1467|278/1095|93/364||WARNING_TRANSCRIPT_NO_START_CODON
chr01	969620	G	A	6744.73	0/0	0/0	0/0	0/0	1/1	0/0	0/0	1/1	0/0	0/0	0/0	0/0	1/1	0/0	0/0	0/0	0/0	0/0	0/0	0/0	0/0	0/0	0/0	0/0	A|missense_variant|MODERATE|OS01G0117200|OS01G0117200|transcript|OS01T0117200-01|protein_coding|3/3|c.2039C>T|p.Pro680Leu|2061/2341|2039/2172|680/723||,A|non_coding_transcript_exon_variant|MODIFIER|OS01G0117233|OS01G0117233|transcript|OS01T0117233-00|lincRNA|1/1|n.82G>A||||||
chr01	969752	A	C	5743.73	0/0	0/0	0/0	0/0	1/1	0/0	0/0	1/1	0/0	0/0	0/0	0/0	1/1	0/0	0/0	0/0	0/0	0/0	0/0	0/0	0/0	0/0	0/0	0/0	C|missense_variant|MODERATE|OS01G0117200|OS01G0117200|transcript|OS01T0117200-01|protein_coding|3/3|c.1907T>G|p.Val636Gly|1929/2341|1907/2172|636/723||,C|non_coding_transcript_exon_variant|MODIFIER|OS01G0117233|OS01G0117233|transcript|OS01T0117233-00|lincRNA|1/1|n.214A>C||||||
chr01	969891	C	CT	7153.77	0/0	0/0	0/0	0/0	1/1	0/0	0/0	1/1	0/0	0/0	0/0	0/0	1/1	0/0	0/0	0/0	0/0	0/0	0/0	0/0	0/0	0/0	0/0	0/0	CT|frameshift_variant|HIGH|OS01G0117200|OS01G0117200|transcript|OS01T0117200-01|protein_coding|3/3|c.1767dupA|p.Asp590fs|1789/2341|1767/2172|589/723||,CT|non_coding_transcript_exon_variant|MODIFIER|OS01G0117233|OS01G0117233|transcript|OS01T0117233-00|lincRNA|1/1|n.354dupT||||||INFO_REALIGN_3_PRIME
chr01	970022	G	A	6072.73	0/0	0/0	0/0	0/0	1/1	0/0	0/0	1/1	0/0	0/0	0/0	0/0	1/1	0/0	0/0	0/0	0/0	0/0	0/0	0/0	0/0	0/0	0/0	0/0	A|missense_variant|MODERATE|OS01G0117200|OS01G0117200|transcript|OS01T0117200-01|protein_coding|3/3|c.1637C>T|p.Ala546Val|1659/2341|1637/2172|546/723||,A|non_coding_transcript_exon_variant|MODIFIER|OS01G0117233|OS01G0117233|transcript|OS01T0117233-00|lincRNA|1/1|n.484G>A||||||
chr01	977055	T	C	5964.73	0/0	0/0	0/0	0/0	1/1	0/0	0/0	1/1	0/0	0/0	0/0	0/0	1/1	0/0	0/0	0/0	0/0	0/0	0/0	0/0	0/0	0/0	0/0	0/0	C|missense_variant|MODERATE|OS01G0117266|OS01G0117266|transcript|OS01T0117266-00|protein_coding|1/1|c.290T>C|p.Val97Ala|290/453|290/453|97/150||,C|upstream_gene_variant|MODIFIER|EPlOSAG00000027859|EPlOSAG00000027859|transcript|EPlOSAT00000029247|lincRNA||n.-538A>G|||||538|,C|downstream_gene_variant|MODIFIER|EPlOSAG00000032413|EPlOSAG00000032413|transcript|EPlOSAT00000033801|lincRNA||n.*538T>C||||…
chr01	977176	GA	G	5346.73	0/0	0/0	0/0	0/0	1/1	0/0	0/0	1/1	0/0	0/0	0/0	0/0	1/1	0/0	0/0	0/0	0/0	0/0	0/0	0/0	0/0	0/0	0/0	0/0	G|frameshift_variant|HIGH|OS01G0117266|OS01G0117266|transcript|OS01T0117266-00|protein_coding|1/1|c.413delA|p.Lys138fs|413/453|413/453|138/150||INFO_REALIGN_3_PRIME,G|upstream_gene_variant|MODIFIER|EPlOSAG00000027859|EPlOSAG00000027859|transcript|EPlOSAT00000029247|lincRNA||n.-660delT|||||660|,G|downstream_gene_variant|MODIFIER|EPlOSAG00000032413|EPlOSAG00000032413|transcript|EPlOSAT00000033801|l…
chr01	984540	A	T	3992.73	0/0	0/0	0/0	0/0	1|1	0/0	0/0	1|1	0/0	0/0	0/0	0/0	1|1	0/0	0/0	0/0	0/0	0/0	0/0	0/0	0/0	0/0	0/0	0/0	T|missense_variant|MODERATE|OS01G0117400|OS01G0117400|transcript|OS01T0117400-00|protein_coding|1/1|c.594T>A|p.Asp198Glu|594/624|594/624|198/207||,T|5_prime_UTR_variant|MODIFIER|OS01G0117450|OS01G0117450|transcript|OS01T0117450-00|protein_coding|1/2|c.-47A>T|||||47|
chr01	984547	T	C	3670.73	0/0	0/0	0/0	0/0	1|1	0/0	0/0	1|1	0/0	0/0	0/0	0/0	1|1	0/0	0/0	0/0	0/0	0/0	0/0	0/0	0/0	0/0	0/0	0/0	C|missense_variant|MODERATE|OS01G0117400|OS01G0117400|transcript|OS01T0117400-00|protein_coding|1/1|c.587A>G|p.Asp196Gly|587/624|587/624|196/207||,C|5_prime_UTR_variant|MODIFIER|OS01G0117450|OS01G0117450|transcript|OS01T0117450-00|protein_coding|1/2|c.-40T>C|||||40|
chr01	984615	C	G	2919.73	0/0	0/0	0/0	0/0	1/1	0/0	0/0	1/1	0/0	0/0	0/0	0/0	1/1	0/0	0/0	0/0	0/0	0/0	0/0	0/0	0/0	0/0	0/0	0/0	G|missense_variant|MODERATE|OS01G0117400|OS01G0117400|transcript|OS01T0117400-00|protein_coding|1/1|c.519G>C|p.Leu173Phe|519/624|519/624|173/207||,G|missense_variant|MODERATE|OS01G0117450|OS01G0117450|transcript|OS01T0117450-00|protein_coding|1/2|c.29C>G|p.Ala10Gly|80/2085|29/363|10/120||
chr01	984662	C	T	7787.73	0/0	0/0	0/0	0/0	1|1	0/0	0/0	1|1	0/0	0/0	0/0	0/0	1|1	0/0	0/0	0/0	0/0	0/0	0/0	0/0	0/0	0/0	0/0	0/0	T|missense_variant|MODERATE|OS01G0117400|OS01G0117400|transcript|OS01T0117400-00|protein_coding|1/1|c.472G>A|p.Glu158Lys|472/624|472/624|158/207||,T|missense_variant|MODERATE|OS01G0117450|OS01G0117450|transcript|OS01T0117450-00|protein_coding|1/2|c.76C>T|p.His26Tyr|127/2085|76/363|26/120||
chr01	984665	C	T	7952.73	0/0	0/0	0/0	0/0	1|1	0/0	0/0	1|1	0/0	0/0	0/0	0/0	1|1	0/0	0/0	0/0	0/0	0/0	0/0	0/0	0/0	0/0	0/0	0/0	T|missense_variant|MODERATE|OS01G0117400|OS01G0117400|transcript|OS01T0117400-00|protein_coding|1/1|c.469G>A|p.Asp157Asn|469/624|469/624|157/207||,T|missense_variant|MODERATE|OS01G0117450|OS01G0117450|transcript|OS01T0117450-00|protein_coding|1/2|c.79C>T|p.Arg27Trp|130/2085|79/363|27/120||
chr01	990046	C	T	1924.08	0/0	0/0	0/0	0/0	./.	0/0	1/1	./.	0/0	0/0	0/0	0/0	./.	0/0	0/0	0/0	0/0	0/0	0/0	0/0	0/0	0/0	0/0	0/0	T|missense_variant|MODERATE|OS01G0117500|OS01G0117500|transcript|OS01T0117500-00|protein_coding|3/3|c.818C>T|p.Pro273Leu|1187/1886|818/1419|273/472||
chr01	1334135	C	T	6214.73	0/0	0/0	0/0	0/0	1/1	0/0	0/0	1/1	0/0	0/0	0/0	0/0	1/1	0/0	0/0	0/0	0/0	0/0	0/0	0/0	0/0	0/0	0/0	0/0	T|missense_variant|MODERATE|OS01G0123700|OS01G0123700|transcript|OS01T0123700-00|protein_coding|2/2|c.526G>A|p.Ala176Thr|526/909|526/909|176/302||,T|upstream_gene_variant|MODIFIER|EPlOSAG00000035426|EPlOSAG00000035426|transcript|EPlOSAT00000036814|lincRNA||n.-854C>T|||||854|,T|upstream_gene_variant|MODIFIER|OS01G0123800|OS01G0123800|transcript|OS01T0123800-00|protein_coding||c.-1729C>T|||||1729|,…
chr01	1335865	T	C	1791.06	0/0	0/0	0/0	0/0	0/0	0/0	0/0	0/0	1/1	0/0	0/0	0/0	0/0	0/0	0/0	0/0	0/0	0/0	0/0	0/0	0/0	0/0	0/0	0/0	C|start_lost|HIGH|OS01G0123800|OS01G0123800|transcript|OS01T0123800-00|protein_coding|1/2|c.2T>C|p.Met1?|2/1161|2/1161|1/386||,C|upstream_gene_variant|MODIFIER|OS01G0123700|OS01G0123700|transcript|OS01T0123700-00|protein_coding||c.-1096A>G|||||1096|,C|upstream_gene_variant|MODIFIER|EPlOSAG00000033208|EPlOSAG00000033208|transcript|EPlOSAT00000034596|lincRNA||n.-753A>G|||||753|,C|downstream_gene_va…
chr01	1347950	C	G	15750	0/0	0/0	0/0	0/0	1|1	0/0	1|1	1|1	0/0	1|1	0/0	0/0	1|1	0/0	0/0	0/0	0/0	0/0	0/0	1|1	0/0	0/0	0/0	0/0	G|missense_variant|MODERATE|OS01G0124200|OS01G0124200|transcript|OS01T0124200-02|protein_coding|1/1|c.748G>C|p.Glu250Gln|774/1059|748/756|250/251||,G|upstream_gene_variant|MODIFIER|OS01G0124100|OS01G0124100|transcript|OS01T0124100-01|protein_coding||c.-1924G>C|||||1903|
chr01	1347978	C	A	6378.73	0/0	0/0	0/0	0/0	0/0	0/0	1/1	0/0	0/0	1/1	0/0	0/0	0/0	0/0	0/0	0/0	0/0	0/0	0/0	1/1	0/0	0/0	0/0	0/0	A|missense_variant|MODERATE|OS01G0124200|OS01G0124200|transcript|OS01T0124200-02|protein_coding|1/1|c.720G>T|p.Gln240His|746/1059|720/756|240/251||,A|upstream_gene_variant|MODIFIER|OS01G0124100|OS01G0124100|transcript|OS01T0124100-01|protein_coding||c.-1952G>T|||||1931|
chr01	1360651	A	G	10097	0/0	0/0	0/0	0/0	1/1	0/0	1/1	1/1	0/0	1/1	0/0	0/0	1/1	0/0	0/0	0/0	0/0	0/0	0/0	1/1	0/0	0/0	0/0	0/0	G|missense_variant|MODERATE|OS01G0124550|OS01G0124550|transcript|OS01T0124550-00|protein_coding|10/10|c.181A>G|p.Lys61Glu|2178/2571|181/574|61/190||WARNING_TRANSCRIPT_INCOMPLETE,G|upstream_gene_variant|MODIFIER|EPlOSAG00000029637|EPlOSAG00000029637|transcript|EPlOSAT00000031025|lincRNA||n.-1764T>C|||||1764|,G|downstream_gene_variant|MODIFIER|EPlOSAG00000030109|EPlOSAG00000030109|transcript|EPlOSA…
chr01	1360686	AACG	A	12607	0/0	0/0	0/0	0/0	1/1	0/0	1/1	1/1	0/0	1/1	0/0	0/0	1/1	0/0	0/0	0/0	0/0	0/0	0/0	1/1	0/0	0/0	0/0	0/0	A|disruptive_inframe_deletion|MODERATE|OS01G0124550|OS01G0124550|transcript|OS01T0124550-00|protein_coding|10/10|c.218_220delCGA|p.Thr73del|2215/2571|218/574|73/190||WARNING_TRANSCRIPT_INCOMPLETE&INFO_REALIGN_3_PRIME,A|upstream_gene_variant|MODIFIER|EPlOSAG00000029637|EPlOSAG00000029637|transcript|EPlOSAT00000031025|lincRNA||n.-1802_-1800delCGT|||||1800|,A|downstream_gene_variant|MODIFIER|EPlOSAG…
chr01	1365864	C	CCGT	7977.01	0/0	0/0	0/0	0/0	1|1	0/0	1|1	1|1	0/0	1|1	0/0	0/0	1|1	0/0	0/0	0/0	0/0	0/0	0/0	1|1	0/0	0/0	0/0	0/0	CCGT|conservative_inframe_insertion|MODERATE|OS01G0124650|OS01G0124650|transcript|OS01T0124650-02|protein_coding|1/1|c.549_550insACG|p.Cys183_Glu184insThr|568/847|549/558|183/185||,CCGT|5_prime_UTR_variant|MODIFIER|OS01G0124700|OS01G0124700|transcript|OS01T0124700-01|protein_coding|1/1|c.-245_-244insCGT|||||244|,CCGT|upstream_gene_variant|MODIFIER|OS01G0124600|OS01G0124600|transcript|OS01T0124600…
chr01	1365986	T	C	12611.7	0/0	0/0	0/0	0/0	.	0/0	.	1|1	0/0	.	0/0	0/0	.	0/0	0/0	0/0	0/0	0/0	0/0	.	0/0	0/0	0/0	0/0	C|missense_variant|MODERATE|OS01G0124650|OS01G0124650|transcript|OS01T0124650-02|protein_coding|1/1|c.428A>G|p.Lys143Arg|447/847|428/558|143/185||,C|5_prime_UTR_premature_start_codon_gain_variant|LOW|OS01G0124700|OS01G0124700|transcript|OS01T0124700-01|protein_coding|1/1|c.-123T>C||||||,C|5_prime_UTR_variant|MODIFIER|OS01G0124700|OS01G0124700|transcript|OS01T0124700-01|protein_coding|1/1|c.-123T>…
chr01	1366170	T	G	20333	0/0	0/0	0/0	0/0	1/1	0/0	1/1	1/1	0/0	1/1	0/0	0/0	1/1	0/0	0/0	0/0	0/0	0/0	0/0	1/1	0/0	0/0	0/0	0/0	G|missense_variant|MODERATE|OS01G0124650|OS01G0124650|transcript|OS01T0124650-02|protein_coding|1/1|c.244A>C|p.Lys82Gln|263/847|244/558|82/185||,G|missense_variant|MODERATE|OS01G0124700|OS01G0124700|transcript|OS01T0124700-01|protein_coding|1/1|c.62T>G|p.Leu21Trp|468/800|62/318|21/105||,G|upstream_gene_variant|MODIFIER|OS01G0124600|OS01G0124600|transcript|OS01T0124600-00|protein_coding||c.-1888A>…
chr01	1366259	T	C	9365.98	0/0	0/0	0/0	0/0	1|1	0/0	1|1	1|1	0/0	1|1	0/0	0/0	1|1	0/0	0/0	0/0	0/0	0/0	0/0	1|1	0/0	0/0	0/0	0/0	C|missense_variant|MODERATE|OS01G0124650|OS01G0124650|transcript|OS01T0124650-02|protein_coding|1/1|c.155A>G|p.Lys52Arg|174/847|155/558|52/185||,C|missense_variant|MODERATE|OS01G0124700|OS01G0124700|transcript|OS01T0124700-01|protein_coding|1/1|c.151T>C|p.Phe51Leu|557/800|151/318|51/105||,C|upstream_gene_variant|MODIFIER|OS01G0124600|OS01G0124600|transcript|OS01T0124600-00|protein_coding||c.-1977…
chr01	1366265	T	G	9045.98	0/0	0/0	0/0	0/0	1|1	0/0	1|1	1|1	0/0	1|1	0/0	0/0	1|1	0/0	0/0	0/0	0/0	0/0	0/0	1|1	0/0	0/0	0/0	0/0	G|missense_variant|MODERATE|OS01G0124650|OS01G0124650|transcript|OS01T0124650-02|protein_coding|1/1|c.149A>C|p.Lys50Thr|168/847|149/558|50/185||,G|missense_variant|MODERATE|OS01G0124700|OS01G0124700|transcript|OS01T0124700-01|protein_coding|1/1|c.157T>G|p.Phe53Val|563/800|157/318|53/105||,G|upstream_gene_variant|MODIFIER|OS01G0124600|OS01G0124600|transcript|OS01T0124600-00|protein_coding||c.-1983…
chr01	1366315	G	C	5216.87	0/0	0/0	0/0	0/0	1|1	0/0	1|1	1|1	0/0	1|1	0/0	0/0	1|1	0/0	0/0	0/0	0/0	0/0	0/0	./.	0/0	0/0	0/0	0/0	C|missense_variant|MODERATE|OS01G0124650|OS01G0124650|transcript|OS01T0124650-02|protein_coding|1/1|c.99C>G|p.Asn33Lys|118/847|99/558|33/185||,C|synonymous_variant|LOW|OS01G0124700|OS01G0124700|transcript|OS01T0124700-01|protein_coding|1/1|c.207G>C|p.Val69Val|613/800|207/318|69/105||
chr01	1366329	CG	C	4883.31	0/0	0/0	0/0	0/0	1|1	0/0	1|1	1|1	0/0	1|1	0/0	0/0	1|1	0/0	0/0	0/0	0/0	0/0	0/0	./.	0/0	0/0	0/0	0/0	C|frameshift_variant|HIGH|OS01G0124650|OS01G0124650|transcript|OS01T0124650-02|protein_coding|1/1|c.84delC|p.Asp28fs|103/847|84/558|28/185||,C|frameshift_variant|HIGH|OS01G0124700|OS01G0124700|transcript|OS01T0124700-01|protein_coding|1/1|c.222delG|p.Ser75fs|628/800|222/318|74/105||
chr01	1366331	TCG	T	4858.31	0/0	0/0	0/0	0/0	1|1	0/0	1|1	1|1	0/0	1|1	0/0	0/0	1|1	0/0	0/0	0/0	0/0	0/0	0/0	./.	0/0	0/0	0/0	0/0	T|frameshift_variant|HIGH|OS01G0124650|OS01G0124650|transcript|OS01T0124650-02|protein_coding|1/1|c.81_82delCG|p.Asp27fs|101/847|81/558|27/185||,T|frameshift_variant|HIGH|OS01G0124700|OS01G0124700|transcript|OS01T0124700-01|protein_coding|1/1|c.224_225delCG|p.Ser75fs|630/800|224/318|75/105||
chr01	1366338	C	G	4120.33	0/0	0/0	0/0	0/0	1|1	0/0	1|1	1|1	0/0	1|1	0/0	0/0	1|1	0/0	0/0	0/0	0/0	0/0	0/0	./.	0/0	0/0	0/0	0/0	G|missense_variant|MODERATE|OS01G0124650|OS01G0124650|transcript|OS01T0124650-02|protein_coding|1/1|c.76G>C|p.Ala26Pro|95/847|76/558|26/185||,G|missense_variant|MODERATE|OS01G0124700|OS01G0124700|transcript|OS01T0124700-01|protein_coding|1/1|c.230C>G|p.Ala77Gly|636/800|230/318|77/105||
chr01	1366341	T	C	3850.32	0/0	0/0	0/0	0/0	1|1	0/0	1|1	1|1	0/0	1|1	0/0	0/0	1|1	0/0	0/0	0/0	0/0	0/0	0/0	./.	0/0	0/0	0/0	0/0	C|missense_variant|MODERATE|OS01G0124650|OS01G0124650|transcript|OS01T0124650-02|protein_coding|1/1|c.73A>G|p.Thr25Ala|92/847|73/558|25/185||,C|missense_variant|MODERATE|OS01G0124700|OS01G0124700|transcript|OS01T0124700-01|protein_coding|1/1|c.233T>C|p.Val78Ala|639/800|233/318|78/105||
chr01	1366346	A	T	4165.3	0/0	0/0	0/0	0/0	1|1	0/0	1|1	1|1	0/0	1|1	0/0	0/0	1|1	0/0	0/0	0/0	0/0	0/0	0/0	./.	0/0	0/0	0/0	0/0	T|missense_variant|MODERATE|OS01G0124650|OS01G0124650|transcript|OS01T0124650-02|protein_coding|1/1|c.68T>A|p.Leu23His|87/847|68/558|23/185||,T|missense_variant|MODERATE|OS01G0124700|OS01G0124700|transcript|OS01T0124700-01|protein_coding|1/1|c.238A>T|p.Arg80Trp|644/800|238/318|80/105||
chr01	1366407	T	C	2428.95	0/0	0/0	0/0	0/0	./.	0/0	1|1	./.	0/0	./.	0/0	0/0	./.	0/0	0/0	0/0	0/0	0/0	0/0	.	0/0	0/0	0/0	0/0	C|missense_variant|MODERATE|OS01G0124650|OS01G0124650|transcript|OS01T0124650-02|protein_coding|1/1|c.7A>G|p.Thr3Ala|26/847|7/558|3/185||,C|missense_variant|MODERATE|OS01G0124700|OS01G0124700|transcript|OS01T0124700-01|protein_coding|1/1|c.299T>C|p.Val100Ala|705/800|299/318|100/105||
chr01	1373626	G	A	12591	0/0	0/0	0/0	0/0	1|1	0/0	1|1	1|1	0/0	1|1	0/0	0/0	1|1	0/0	0/0	0/0	0/0	0/0	0/0	1|1	0/0	0/0	0/0	0/0	A|missense_variant|MODERATE|OS01G0124900|OS01G0124900|transcript|OS01T0124900-00|protein_coding|3/3|c.85G>A|p.Gly29Ser|313/825|85/597|29/198||,A|upstream_gene_variant|MODIFIER|EPlOSAG00000020368|EPlOSAG00000020368|transcript|EPlOSAT00000021756|lincRNA||n.-1198G>A|||||1198|,A|upstream_gene_variant|MODIFIER|OS01G0125000|OS01G0125000|transcript|OS01T0125000-00|protein_coding||c.-1543G>A|||||1543|
chr01	1373632	G	A	12575	0/0	0/0	0/0	0/0	1|1	0/0	1|1	1|1	0/0	1|1	0/0	0/0	1|1	0/0	0/0	0/0	0/0	0/0	0/0	1|1	0/0	0/0	0/0	0/0	A|missense_variant|MODERATE|OS01G0124900|OS01G0124900|transcript|OS01T0124900-00|protein_coding|3/3|c.91G>A|p.Gly31Ser|319/825|91/597|31/198||,A|upstream_gene_variant|MODIFIER|EPlOSAG00000020368|EPlOSAG00000020368|transcript|EPlOSAT00000021756|lincRNA||n.-1192G>A|||||1192|,A|upstream_gene_variant|MODIFIER|OS01G0125000|OS01G0125000|transcript|OS01T0125000-00|protein_coding||c.-1537G>A|||||1537|
chr01	1373644	T	A	13070	0/0	0/0	0/0	0/0	1|1	0/0	1|1	1|1	0/0	1|1	0/0	0/0	1|1	0/0	0/0	0/0	0/0	0/0	0/0	1|1	0/0	0/0	0/0	0/0	A|missense_variant|MODERATE|OS01G0124900|OS01G0124900|transcript|OS01T0124900-00|protein_coding|3/3|c.103T>A|p.Ser35Thr|331/825|103/597|35/198||,A|upstream_gene_variant|MODIFIER|EPlOSAG00000020368|EPlOSAG00000020368|transcript|EPlOSAT00000021756|lincRNA||n.-1180T>A|||||1180|,A|upstream_gene_variant|MODIFIER|OS01G0125000|OS01G0125000|transcript|OS01T0125000-00|protein_coding||c.-1525T>A|||||1525|
chr01	1373662	A	G	13475	0/0	0/0	0/0	0/0	1|1	0/0	1|1	1|1	0/0	1|1	0/0	0/0	1|1	0/0	0/0	0/0	0/0	0/0	0/0	1|1	0/0	0/0	0/0	0/0	G|missense_variant|MODERATE|OS01G0124900|OS01G0124900|transcript|OS01T0124900-00|protein_coding|3/3|c.121A>G|p.Lys41Glu|349/825|121/597|41/198||,G|upstream_gene_variant|MODIFIER|EPlOSAG00000020368|EPlOSAG00000020368|transcript|EPlOSAT00000021756|lincRNA||n.-1162A>G|||||1162|,G|upstream_gene_variant|MODIFIER|OS01G0125000|OS01G0125000|transcript|OS01T0125000-00|protein_coding||c.-1507A>G|||||1507|
chr01	1373794	T	C	21200	0/0	0/0	0/0	0/0	1/1	0/0	1/1	1/1	0/0	1/1	0/0	0/0	1/1	0/0	0/0	0/0	0/0	0/0	0/0	1/1	0/0	0/0	0/0	0/0	C|missense_variant|MODERATE|OS01G0124900|OS01G0124900|transcript|OS01T0124900-00|protein_coding|3/3|c.253T>C|p.Ser85Pro|481/825|253/597|85/198||,C|upstream_gene_variant|MODIFIER|EPlOSAG00000020368|EPlOSAG00000020368|transcript|EPlOSAT00000021756|lincRNA||n.-1030T>C|||||1030|,C|upstream_gene_variant|MODIFIER|OS01G0125000|OS01G0125000|transcript|OS01T0125000-00|protein_coding||c.-1375T>C|||||1375|
chr01	1374031	A	G	11800	0/0	0/0	0/0	0/0	1/1	0/0	1/1	1/1	0/0	1/1	0/0	0/0	1/1	0/0	0/0	0/0	0/0	0/0	0/0	1/1	0/0	0/0	0/0	0/0	G|missense_variant|MODERATE|OS01G0124900|OS01G0124900|transcript|OS01T0124900-00|protein_coding|3/3|c.490A>G|p.Lys164Glu|718/825|490/597|164/198||,G|upstream_gene_variant|MODIFIER|EPlOSAG00000020368|EPlOSAG00000020368|transcript|EPlOSAT00000021756|lincRNA||n.-793A>G|||||793|,G|upstream_gene_variant|MODIFIER|OS01G0125000|OS01G0125000|transcript|OS01T0125000-00|protein_coding||c.-1138A>G|||||1138|
chr01	1374063	G	T	13908	0/0	0/0	0/0	0/0	1|1	0/0	1|1	1|1	0/0	1|1	0/0	0/0	1|1	0/0	0/0	0/0	0/0	0/0	0/0	1|1	0/0	0/0	0/0	0/0	T|missense_variant|MODERATE|OS01G0124900|OS01G0124900|transcript|OS01T0124900-00|protein_coding|3/3|c.522G>T|p.Glu174Asp|750/825|522/597|174/198||,T|upstream_gene_variant|MODIFIER|EPlOSAG00000020368|EPlOSAG00000020368|transcript|EPlOSAT00000021756|lincRNA||n.-761G>T|||||761|,T|upstream_gene_variant|MODIFIER|OS01G0125000|OS01G0125000|transcript|OS01T0125000-00|protein_coding||c.-1106G>T|||||1106|
chr01	1374098	AGG	A	15463	0/0	0/0	0/0	0/0	1|1	0/0	1|1	1|1	0/0	1|1	0/0	0/0	1|1	0/0	0/0	0/0	0/0	0/0	0/0	1|1	0/0	0/0	0/0	0/0	A|frameshift_variant|HIGH|OS01G0124900|OS01G0124900|transcript|OS01T0124900-00|protein_coding|3/3|c.558_559delGG|p.Asp187fs|786/825|558/597|186/198||,A|upstream_gene_variant|MODIFIER|EPlOSAG00000020368|EPlOSAG00000020368|transcript|EPlOSAT00000021756|lincRNA||n.-725_-724delGG|||||725|,A|upstream_gene_variant|MODIFIER|OS01G0125000|OS01G0125000|transcript|OS01T0125000-00|protein_coding||c.-1070_-10…
chr01	1374101	ATGAGGATGAC	A	15687	0/0	0/0	0/0	0/0	1|1	0/0	1|1	1|1	0/0	1|1	0/0	0/0	1|1	0/0	0/0	0/0	0/0	0/0	0/0	1|1	0/0	0/0	0/0	0/0	A|frameshift_variant|HIGH|OS01G0124900|OS01G0124900|transcript|OS01T0124900-00|protein_coding|3/3|c.561_570delTGAGGATGAC|p.Asp187fs|789/825|561/597|187/198||,A|upstream_gene_variant|MODIFIER|EPlOSAG00000020368|EPlOSAG00000020368|transcript|EPlOSAT00000021756|lincRNA||n.-722_-713delTGAGGATGAC|||||722|,A|upstream_gene_variant|MODIFIER|OS01G0125000|OS01G0125000|transcript|OS01T0125000-00|protein_cod…
chr01	1374130	G	A	15719	0/0	0/0	0/0	0/0	1|1	0/0	1|1	1|1	0/0	1|1	0/0	0/0	1|1	0/0	0/0	0/0	0/0	0/0	0/0	1|1	0/0	0/0	0/0	0/0	A|missense_variant|MODERATE|OS01G0124900|OS01G0124900|transcript|OS01T0124900-00|protein_coding|3/3|c.589G>A|p.Gly197Arg|817/825|589/597|197/198||,A|upstream_gene_variant|MODIFIER|EPlOSAG00000020368|EPlOSAG00000020368|transcript|EPlOSAT00000021756|lincRNA||n.-694G>A|||||694|,A|upstream_gene_variant|MODIFIER|OS01G0125000|OS01G0125000|transcript|OS01T0125000-00|protein_coding||c.-1039G>A|||||1039|
chr01	1375298	C	A	7731.98	0/0	0/0	0/0	0/0	1|1	0/0	1|1	1|1	0/0	1|1	0/0	0/0	1|1	0/0	0/0	0/0	0/0	0/0	0/0	1|1	0/0	0/0	0/0	0/0	A|missense_variant|MODERATE|OS01G0125000|OS01G0125000|transcript|OS01T0125000-00|protein_coding|1/2|c.130C>A|p.Gln44Lys|130/1020|130/1020|44/339||,A|downstream_gene_variant|MODIFIER|OS01G0124900|OS01G0124900|transcript|OS01T0124900-00|protein_coding||c.*1160C>A|||||1160|,A|downstream_gene_variant|MODIFIER|EPlOSAG00000020368|EPlOSAG00000020368|transcript|EPlOSAT00000021756|lincRNA||n.*409C>A|||||4…
chr01	1375309	G	T	7346.98	0/0	0/0	0/0	0/0	1|1	0/0	1|1	1|1	0/0	1|1	0/0	0/0	1|1	0/0	0/0	0/0	0/0	0/0	0/0	1|1	0/0	0/0	0/0	0/0	T|missense_variant|MODERATE|OS01G0125000|OS01G0125000|transcript|OS01T0125000-00|protein_coding|1/2|c.141G>T|p.Arg47Ser|141/1020|141/1020|47/339||,T|downstream_gene_variant|MODIFIER|OS01G0124900|OS01G0124900|transcript|OS01T0124900-00|protein_coding||c.*1171G>T|||||1171|,T|downstream_gene_variant|MODIFIER|EPlOSAG00000020368|EPlOSAG00000020368|transcript|EPlOSAT00000021756|lincRNA||n.*420G>T|||||4…
chr01	1375543	T	C	9577.98	0/0	0/0	0/0	0/0	1/1	0/0	1/1	1/1	0/0	1/1	0/0	0/0	1/1	0/0	0/0	0/0	0/0	0/0	0/0	1/1	0/0	0/0	0/0	0/0	C|missense_variant|MODERATE|OS01G0125000|OS01G0125000|transcript|OS01T0125000-00|protein_coding|2/2|c.236T>C|p.Phe79Ser|236/1020|236/1020|79/339||,C|downstream_gene_variant|MODIFIER|OS01G0124900|OS01G0124900|transcript|OS01T0124900-00|protein_coding||c.*1405T>C|||||1405|,C|downstream_gene_variant|MODIFIER|EPlOSAG00000020368|EPlOSAG00000020368|transcript|EPlOSAT00000021756|lincRNA||n.*654T>C|||||6…
chr01	1375762	C	CTCG	11942	0/0	0/0	0/0	0/0	1/1	0/0	1/1	1/1	0/0	1/1	0/0	0/0	1/1	0/0	0/0	0/0	0/0	0/0	0/0	1/1	0/0	0/0	0/0	0/0	CTCG|disruptive_inframe_insertion|MODERATE|OS01G0125000|OS01G0125000|transcript|OS01T0125000-00|protein_coding|2/2|c.458_460dupGTC|p.Arg153dup|461/1020|461/1020|154/339||INFO_REALIGN_3_PRIME,CTCG|downstream_gene_variant|MODIFIER|OS01G0124900|OS01G0124900|transcript|OS01T0124900-00|protein_coding||c.*1624_*1625insTCG|||||1625|,CTCG|downstream_gene_variant|MODIFIER|EPlOSAG00000020368|EPlOSAG0000002…
chr01	1375842	G	A	11414	0/0	0/0	0/0	0/0	1/1	0/0	1/1	1/1	0/0	1/1	0/0	0/0	1/1	0/0	0/0	0/0	0/0	0/0	0/0	1/1	0/0	0/0	0/0	0/0	A|missense_variant|MODERATE|OS01G0125000|OS01G0125000|transcript|OS01T0125000-00|protein_coding|2/2|c.535G>A|p.Val179Ile|535/1020|535/1020|179/339||,A|downstream_gene_variant|MODIFIER|OS01G0124900|OS01G0124900|transcript|OS01T0124900-00|protein_coding||c.*1704G>A|||||1704|,A|downstream_gene_variant|MODIFIER|EPlOSAG00000020368|EPlOSAG00000020368|transcript|EPlOSAT00000021756|lincRNA||n.*953G>A||||…
chr01	1375938	G	C	7883.99	0/0	0/0	0/0	0/0	1/1	0/0	1/1	1/1	0/0	1/1	0/0	0/0	1/1	0/0	0/0	0/0	0/0	0/0	0/0	1/1	0/0	0/0	0/0	0/0	C|missense_variant|MODERATE|OS01G0125000|OS01G0125000|transcript|OS01T0125000-00|protein_coding|2/2|c.631G>C|p.Ala211Pro|631/1020|631/1020|211/339||,C|downstream_gene_variant|MODIFIER|OS01G0124900|OS01G0124900|transcript|OS01T0124900-00|protein_coding||c.*1800G>C|||||1800|,C|downstream_gene_variant|MODIFIER|EPlOSAG00000020368|EPlOSAG00000020368|transcript|EPlOSAT00000021756|lincRNA||n.*1049G>C|||…
chr01	1375950	G	A	7512.98	0/0	0/0	0/0	0/0	1/1	0/0	1/1	1/1	0/0	1/1	0/0	0/0	1/1	0/0	0/0	0/0	0/0	0/0	0/0	1/1	0/0	0/0	0/0	0/0	A|missense_variant|MODERATE|OS01G0125000|OS01G0125000|transcript|OS01T0125000-00|protein_coding|2/2|c.643G>A|p.Gly215Arg|643/1020|643/1020|215/339||,A|downstream_gene_variant|MODIFIER|OS01G0124900|OS01G0124900|transcript|OS01T0124900-00|protein_coding||c.*1812G>A|||||1812|,A|downstream_gene_variant|MODIFIER|EPlOSAG00000020368|EPlOSAG00000020368|transcript|EPlOSAT00000021756|lincRNA||n.*1061G>A|||…
chr01	1376008	T	A	11550	0/0	0/0	0/0	0/0	1|1	0/0	1|1	1|1	0/0	1|1	0/0	0/0	1|1	0/0	0/0	0/0	0/0	0/0	0/0	1/1	0/0	0/0	0/0	0/0	A|missense_variant|MODERATE|OS01G0125000|OS01G0125000|transcript|OS01T0125000-00|protein_coding|2/2|c.701T>A|p.Leu234Gln|701/1020|701/1020|234/339||,A|downstream_gene_variant|MODIFIER|OS01G0124900|OS01G0124900|transcript|OS01T0124900-00|protein_coding||c.*1870T>A|||||1870|,A|downstream_gene_variant|MODIFIER|EPlOSAG00000020368|EPlOSAG00000020368|transcript|EPlOSAT00000021756|lincRNA||n.*1119T>A|||…
chr01	1376013	T	C	11577	0/0	0/0	0/0	0/0	1|1	0/0	1|1	1|1	0/0	1|1	0/0	0/0	1|1	0/0	0/0	0/0	0/0	0/0	0/0	1|1	0/0	0/0	0/0	0/0	C|missense_variant|MODERATE|OS01G0125000|OS01G0125000|transcript|OS01T0125000-00|protein_coding|2/2|c.706T>C|p.Cys236Arg|706/1020|706/1020|236/339||,C|downstream_gene_variant|MODIFIER|OS01G0124900|OS01G0124900|transcript|OS01T0124900-00|protein_coding||c.*1875T>C|||||1875|,C|downstream_gene_variant|MODIFIER|EPlOSAG00000020368|EPlOSAG00000020368|transcript|EPlOSAT00000021756|lincRNA||n.*1124T>C|||…
chr01	1376026	T	A	10405	0/0	0/0	0/0	0/0	1/1	0/0	1/1	1/1	0/0	1/1	0/0	0/0	1/1	0/0	0/0	0/0	0/0	0/0	0/0	1/1	0/0	0/0	0/0	0/0	A|missense_variant|MODERATE|OS01G0125000|OS01G0125000|transcript|OS01T0125000-00|protein_coding|2/2|c.719T>A|p.Val240Asp|719/1020|719/1020|240/339||,A|downstream_gene_variant|MODIFIER|OS01G0124900|OS01G0124900|transcript|OS01T0124900-00|protein_coding||c.*1888T>A|||||1888|,A|downstream_gene_variant|MODIFIER|EPlOSAG00000020368|EPlOSAG00000020368|transcript|EPlOSAT00000021756|lincRNA||n.*1137T>A|||…
chr01	1376072	T	G	11803	0/0	0/0	0/0	0/0	1/1	0/0	1/1	1/1	0/0	1/1	0/0	0/0	1/1	0/0	0/0	0/0	0/0	0/0	0/0	1/1	0/0	0/0	0/0	0/0	G|missense_variant|MODERATE|OS01G0125000|OS01G0125000|transcript|OS01T0125000-00|protein_coding|2/2|c.765T>G|p.Cys255Trp|765/1020|765/1020|255/339||,G|downstream_gene_variant|MODIFIER|OS01G0124900|OS01G0124900|transcript|OS01T0124900-00|protein_coding||c.*1934T>G|||||1934|,G|downstream_gene_variant|MODIFIER|EPlOSAG00000020368|EPlOSAG00000020368|transcript|EPlOSAT00000021756|lincRNA||n.*1183T>G|||…
chr01	1376118	G	C	11906	0/0	0/0	0/0	0/0	1/1	0/0	1/1	1/1	0/0	1/1	0/0	0/0	1/1	0/0	0/0	0/0	0/0	0/0	0/0	1/1	0/0	0/0	0/0	0/0	C|missense_variant|MODERATE|OS01G0125000|OS01G0125000|transcript|OS01T0125000-00|protein_coding|2/2|c.811G>C|p.Gly271Arg|811/1020|811/1020|271/339||,C|downstream_gene_variant|MODIFIER|OS01G0124900|OS01G0124900|transcript|OS01T0124900-00|protein_coding||c.*1980G>C|||||1980|,C|downstream_gene_variant|MODIFIER|EPlOSAG00000020368|EPlOSAG00000020368|transcript|EPlOSAT00000021756|lincRNA||n.*1229G>C|||…
chr01	1376189	GGAC	G	12136	0/0	0/0	0/0	0/0	1|1	0/0	1|1	1|1	0/0	1|1	0/0	0/0	1|1	0/0	0/0	0/0	0/0	0/0	0/0	1|1	0/0	0/0	0/0	0/0	G|disruptive_inframe_deletion|MODERATE|OS01G0125000|OS01G0125000|transcript|OS01T0125000-00|protein_coding|2/2|c.894_896delCGA|p.Asp298del|894/1020|894/1020|298/339||INFO_REALIGN_3_PRIME,G|downstream_gene_variant|MODIFIER|EPlOSAG00000020368|EPlOSAG00000020368|transcript|EPlOSAT00000021756|lincRNA||n.*1301_*1303delGAC|||||1301|
chr01	1376221	T	G	14003	0/0	0/0	0/0	0/0	1|1	0/0	1|1	1|1	0/0	1|1	0/0	0/0	1|1	0/0	0/0	0/0	0/0	0/0	0/0	1|1	0/0	0/0	0/0	0/0	G|missense_variant|MODERATE|OS01G0125000|OS01G0125000|transcript|OS01T0125000-00|protein_coding|2/2|c.914T>G|p.Val305Gly|914/1020|914/1020|305/339||,G|downstream_gene_variant|MODIFIER|EPlOSAG00000020368|EPlOSAG00000020368|transcript|EPlOSAT00000021756|lincRNA||n.*1332T>G|||||1332|
chr01	1376223	G	A	13688	0/0	0/0	0/0	0/0	1|1	0/0	1|1	1|1	0/0	1|1	0/0	0/0	1|1	0/0	0/0	0/0	0/0	0/0	0/0	1|1	0/0	0/0	0/0	0/0	A|missense_variant|MODERATE|OS01G0125000|OS01G0125000|transcript|OS01T0125000-00|protein_coding|2/2|c.916G>A|p.Asp306Asn|916/1020|916/1020|306/339||,A|downstream_gene_variant|MODIFIER|EPlOSAG00000020368|EPlOSAG00000020368|transcript|EPlOSAT00000021756|lincRNA||n.*1334G>A|||||1334|
chr01	1376248	A	AG	11621	0/0	0/0	0/0	0/0	1|1	0/0	1|1	1|1	0/0	1|1	0/0	0/0	1|1	0/0	0/0	0/0	0/0	0/0	0/0	1|1	0/0	0/0	0/0	0/0	AG|frameshift_variant|HIGH|OS01G0125000|OS01G0125000|transcript|OS01T0125000-00|protein_coding|2/2|c.942dupG|p.Asn315fs|943/1020|943/1020|315/339||INFO_REALIGN_3_PRIME,AG|downstream_gene_variant|MODIFIER|EPlOSAG00000020368|EPlOSAG00000020368|transcript|EPlOSAT00000021756|lincRNA||n.*1359_*1360insG|||||1360|
chr01	1376250	A	AGGACGGGG	12838	0/0	0/0	0/0	0/0	1|1	0/0	1|1	1|1	0/0	1|1	0/0	0/0	1|1	0/0	0/0	0/0	0/0	0/0	0/0	1|1	0/0	0/0	0/0	0/0	AGGACGGGG|frameshift_variant|HIGH|OS01G0125000|OS01G0125000|transcript|OS01T0125000-00|protein_coding|2/2|c.943_944insGGACGGGG|p.Asn315fs|944/1020|944/1020|315/339||,AGGACGGGG|downstream_gene_variant|MODIFIER|EPlOSAG00000020368|EPlOSAG00000020368|transcript|EPlOSAT00000021756|lincRNA||n.*1361_*1362insGGACGGGG|||||1362|
chr01	1376252	T	TACCTCCGATGACGATTGACGAAGGCGAGGATGATGAGGAG	18139	0/0	0/0	0/0	0/0	1|1	0/0	1|1	1|1	0/0	1|1	0/0	0/0	1|1	0/0	0/0	0/0	0/0	0/0	0/0	1|1	0/0	0/0	0/0	0/0	TACCTCCGATGACGATTGACGAAGGCGAGGATGATGAGGAG|frameshift_variant&stop_gained|HIGH|OS01G0125000|OS01G0125000|transcript|OS01T0125000-00|protein_coding|2/2|c.945_946insACCTCCGATGACGATTGACGAAGGCGAGGATGATGAGGAG|p.Asp316fs|946/1020|946/1020|316/339||,TACCTCCGATGACGATTGACGAAGGCGAGGATGATGAGGAG|downstream_gene_variant|MODIFIER|EPlOSAG00000020368|EPlOSAG00000020368|transcript|EPlOSAT00000021756|lincRNA||n.*13…
chr01	1376278	A	G	10954	0/0	0/0	0/0	0/0	1/1	0/0	1/1	1/1	0/0	1/1	0/0	0/0	1/1	0/0	0/0	0/0	0/0	0/0	0/0	1/1	0/0	0/0	0/0	0/0	G|missense_variant|MODERATE|OS01G0125000|OS01G0125000|transcript|OS01T0125000-00|protein_coding|2/2|c.971A>G|p.Asp324Gly|971/1020|971/1020|324/339||,G|downstream_gene_variant|MODIFIER|EPlOSAG00000020368|EPlOSAG00000020368|transcript|EPlOSAT00000021756|lincRNA||n.*1389A>G|||||1389|
chr01	1402415	A	C	14889	0/0	0/0	0/0	0/0	1/1	0/0	1/1	1/1	0/0	1/1	0/0	0/0	1/1	0/0	0/0	0/0	0/0	0/0	0/0	1/1	0/0	0/0	0/0	0/0	C|missense_variant|MODERATE|OS01G0125550|OS01G0125550|transcript|OS01T0125550-01|protein_coding|2/2|c.352T>G|p.Ser118Ala|384/1380|352/393|118/130||,C|upstream_gene_variant|MODIFIER|EPlOSAG00000033805|EPlOSAG00000033805|transcript|EPlOSAT00000035193|lincRNA||n.-1883A>C|||||1883|,C|downstream_gene_variant|MODIFIER|EPlOSAG00000034222|EPlOSAG00000034222|transcript|EPlOSAT00000035610|lincRNA||n.*1883T…
chr01	1416606	T	C	12135	0/0	0/0	0/0	0/0	1/1	0/0	1/1	1/1	0/0	1/1	0/0	0/0	1/1	0/0	0/0	0/0	0/0	0/0	0/0	1/1	0/0	0/0	0/0	0/0	C|missense_variant|MODERATE|OS01G0125800|OS01G0125800|transcript|OS01T0125800-01|protein_coding|4/6|c.1127T>C|p.Val376Ala|1206/2240|1127/1833|376/610||,C|5_prime_UTR_premature_start_codon_gain_variant|LOW|OS01G0125850|OS01G0125850|transcript|OS01T0125850-00|protein_coding|3/6|c.-645A>G||||||,C|5_prime_UTR_variant|MODIFIER|OS01G0125850|OS01G0125850|transcript|OS01T0125850-00|protein_coding|3/6|c.-…
chr01	1434665	G	A	8257.98	0/0	0/0	0/0	0/0	1/1	0/0	1/1	1/1	0/0	1/1	0/0	0/0	1/1	0/0	0/0	0/0	0/0	0/0	0/0	1/1	0/0	0/0	0/0	0/0	A|missense_variant|MODERATE|OS01G0126000|OS01G0126000|transcript|OS01T0126000-01|protein_coding|1/2|c.289C>T|p.Arg97Trp|291/1131|289/414|97/137||WARNING_TRANSCRIPT_NO_START_CODON,A|synonymous_variant|LOW|OS01G0126100|OS01G0126100|transcript|OS01T0126100-01|protein_coding|2/3|c.471G>A|p.Pro157Pro|559/2150|471/1749|157/582||
chr01	1434896	T	C	10311	0/0	0/0	0/0	0/0	1/1	0/0	1/1	1/1	0/0	1/1	0/0	0/0	1/1	0/0	0/0	0/0	0/0	0/0	0/0	1/1	0/0	0/0	0/0	0/0	C|missense_variant|MODERATE|OS01G0126000|OS01G0126000|transcript|OS01T0126000-01|protein_coding|1/2|c.58A>G|p.Ile20Val|60/1131|58/414|20/137||WARNING_TRANSCRIPT_NO_START_CODON,C|synonymous_variant|LOW|OS01G0126100|OS01G0126100|transcript|OS01T0126100-01|protein_coding|2/3|c.702T>C|p.Asp234Asp|790/2150|702/1749|234/582||
chr01	1435258	G	C	9727.98	0/0	0/0	0/0	0/0	1/1	0/0	1/1	1/1	0/0	1/1	0/0	0/0	1/1	0/0	0/0	0/0	0/0	0/0	0/0	1/1	0/0	0/0	0/0	0/0	C|missense_variant|MODERATE|OS01G0126100|OS01G0126100|transcript|OS01T0126100-01|protein_coding|2/3|c.1064G>C|p.Ser355Thr|1152/2150|1064/1749|355/582||,C|upstream_gene_variant|MODIFIER|OS01G0126000|OS01G0126000|transcript|OS01T0126000-01|protein_coding||c.-305C>G|||||303|WARNING_TRANSCRIPT_NO_START_CODON,C|upstream_gene_variant|MODIFIER|OS01G0126200|OS01G0126200|transcript|OS01T0126200-01|protein…
chr01	1444519	T	C	12464	0/0	0/0	0/0	0/0	1/1	0/0	1/1	1/1	0/0	1/1	0/0	0/0	1/1	0/0	0/0	0/0	0/0	0/0	0/0	1/1	0/0	0/0	0/0	0/0	C|missense_variant|MODERATE|OS01G0126200|OS01G0126200|transcript|OS01T0126200-01|protein_coding|2/3|c.1052T>C|p.Val351Ala|1235/2214|1052/1797|351/598||,C|downstream_gene_variant|MODIFIER|EPlOSAG00000032230|EPlOSAG00000032230|transcript|EPlOSAT00000033618|lincRNA||n.*995T>C|||||995|,C|downstream_gene_variant|MODIFIER|EPlOSAG00000050633|EPlOSAG00000050633|transcript|EPlOSAT00000052021|lincRNA||n.*9…
chr01	1444738	T	C	10587	0/0	0/0	0/0	0/0	1/1	0/0	1/1	1/1	0/0	1/1	0/0	0/0	1/1	0/0	0/0	0/0	0/0	0/0	0/0	1/1	0/0	0/0	0/0	0/0	C|missense_variant|MODERATE|OS01G0126200|OS01G0126200|transcript|OS01T0126200-01|protein_coding|2/3|c.1271T>C|p.Met424Thr|1454/2214|1271/1797|424/598||,C|downstream_gene_variant|MODIFIER|EPlOSAG00000032230|EPlOSAG00000032230|transcript|EPlOSAT00000033618|lincRNA||n.*1214T>C|||||1214|,C|downstream_gene_variant|MODIFIER|EPlOSAG00000050633|EPlOSAG00000050633|transcript|EPlOSAT00000052021|lincRNA||n.…
chr01	1445826	G	T	13439	0/0	0/0	0/0	0/0	1|1	0/0	1|1	1|1	0/0	1|1	0/0	0/0	1|1	0/0	0/0	0/0	0/0	0/0	0/0	1|1	0/0	0/0	0/0	0/0	T|missense_variant|MODERATE|OS01G0126401|OS01G0126401|transcript|OS01T0126401-01|protein_coding|1/1|c.494C>A|p.Thr165Lys|3625/3910|494/498|165/165||,T|upstream_gene_variant|MODIFIER|OS01G0126600|OS01G0126600|transcript|OS01T0126600-01|protein_coding||c.-1866G>T|||||1864|WARNING_TRANSCRIPT_NO_START_CODON,T|downstream_gene_variant|MODIFIER|OS01G0126200|OS01G0126200|transcript|OS01T0126200-01|protei…
chr01	1445838	C	T	13639	0/0	0/0	0/0	0/0	1|1	0/0	1|1	1|1	0/0	1|1	0/0	0/0	1|1	0/0	0/0	0/0	0/0	0/0	0/0	1|1	0/0	0/0	0/0	0/0	T|missense_variant|MODERATE|OS01G0126401|OS01G0126401|transcript|OS01T0126401-01|protein_coding|1/1|c.482G>A|p.Cys161Tyr|3613/3910|482/498|161/165||,T|upstream_gene_variant|MODIFIER|OS01G0126600|OS01G0126600|transcript|OS01T0126600-01|protein_coding||c.-1854C>T|||||1852|WARNING_TRANSCRIPT_NO_START_CODON,T|downstream_gene_variant|MODIFIER|OS01G0126200|OS01G0126200|transcript|OS01T0126200-01|protei…
chr01	1445865	C	T	12755	0/0	0/0	0/0	0/0	1|1	0/0	1|1	1|1	0/0	1|1	0/0	0/0	1|1	0/0	0/0	0/0	0/0	0/0	0/0	1|1	0/0	0/0	0/0	0/0	T|missense_variant|MODERATE|OS01G0126401|OS01G0126401|transcript|OS01T0126401-01|protein_coding|1/1|c.455G>A|p.Cys152Tyr|3586/3910|455/498|152/165||,T|upstream_gene_variant|MODIFIER|OS01G0126600|OS01G0126600|transcript|OS01T0126600-01|protein_coding||c.-1827C>T|||||1825|WARNING_TRANSCRIPT_NO_START_CODON,T|downstream_gene_variant|MODIFIER|OS01G0126200|OS01G0126200|transcript|OS01T0126200-01|protei…
chr01	1445917	T	C	5943.98	0/0	0/0	0/0	0/0	1|1	0/0	1|1	1|1	0/0	1|1	0/0	0/0	1|1	0/0	0/0	0/0	0/0	0/0	0/0	1|1	0/0	0/0	0/0	0/0	C|missense_variant|MODERATE|OS01G0126401|OS01G0126401|transcript|OS01T0126401-01|protein_coding|1/1|c.403A>G|p.Arg135Gly|3534/3910|403/498|135/165||,C|upstream_gene_variant|MODIFIER|OS01G0126600|OS01G0126600|transcript|OS01T0126600-01|protein_coding||c.-1775T>C|||||1773|WARNING_TRANSCRIPT_NO_START_CODON,C|downstream_gene_variant|MODIFIER|OS01G0126200|OS01G0126200|transcript|OS01T0126200-01|protei…
chr01	1445928	TTC	T	5232.97	0/0	0/0	0/0	0/0	1|1	0/0	1|1	1|1	0/0	1|1	0/0	0/0	1|1	0/0	0/0	0/0	0/0	0/0	0/0	1|1	0/0	0/0	0/0	0/0	T|frameshift_variant|HIGH|OS01G0126401|OS01G0126401|transcript|OS01T0126401-01|protein_coding|1/1|c.390_391delGA|p.Lys131fs|3522/3910|390/498|130/165||,T|upstream_gene_variant|MODIFIER|OS01G0126600|OS01G0126600|transcript|OS01T0126600-01|protein_coding||c.-1763_-1762delTC|||||1761|WARNING_TRANSCRIPT_NO_START_CODON,T|downstream_gene_variant|MODIFIER|OS01G0126200|OS01G0126200|transcript|OS01T012620…
chr01	1445953	G	GTC	1523.26	0/0	0/0	0/0	0/0	1/1	0/0	1/1	.	0/0	1/1	0/0	0/0	1/1	0/0	0/0	0/0	0/0	0/0	0/0	0/0	0/0	0/0	0/0	0/0	GTC|frameshift_variant|HIGH|OS01G0126401|OS01G0126401|transcript|OS01T0126401-01|protein_coding|1/1|c.365_366dupGA|p.Gln123fs|3497/3910|366/498|122/165||,GTC|upstream_gene_variant|MODIFIER|OS01G0126600|OS01G0126600|transcript|OS01T0126600-01|protein_coding||c.-1739_-1738insTC|||||1736|WARNING_TRANSCRIPT_NO_START_CODON,GTC|downstream_gene_variant|MODIFIER|OS01G0126200|OS01G0126200|transcript|OS01T…
chr01	1446012	GTGGTCGAC	G	7818.92	0/0	0/0	0/0	0/0	1/1	0/0	1/1	1/1	0/0	1/1	0/0	0/0	1/1	0/0	0/0	0/0	0/0	0/0	0/0	1/1	0/0	0/0	0/0	0/0	G|frameshift_variant|HIGH|OS01G0126401|OS01G0126401|transcript|OS01T0126401-01|protein_coding|1/1|c.300_307delGTCGACCA|p.Gln100fs|3438/3910|300/498|100/165||,G|upstream_gene_variant|MODIFIER|OS01G0126600|OS01G0126600|transcript|OS01T0126600-01|protein_coding||c.-1679_-1672delTGGTCGAC|||||1677|WARNING_TRANSCRIPT_NO_START_CODON,G|downstream_gene_variant|MODIFIER|OS01G0126200|OS01G0126200|transcript…
chr01	1446148	T	C	10782	0/0	0/0	0/0	0/0	1|1	0/0	1|1	1|1	0/0	1|1	0/0	0/0	1|1	0/0	0/0	0/0	0/0	0/0	0/0	1|1	0/0	0/0	0/0	0/0	C|missense_variant|MODERATE|OS01G0126401|OS01G0126401|transcript|OS01T0126401-01|protein_coding|1/1|c.172A>G|p.Lys58Glu|3303/3910|172/498|58/165||,C|upstream_gene_variant|MODIFIER|OS01G0126600|OS01G0126600|transcript|OS01T0126600-01|protein_coding||c.-1544T>C|||||1542|WARNING_TRANSCRIPT_NO_START_CODON,C|downstream_gene_variant|MODIFIER|OS01G0126200|OS01G0126200|transcript|OS01T0126200-01|protein_…
chr01	1446172	T	C	10828	0/0	0/0	0/0	0/0	1|1	0/0	1|1	1|1	0/0	1|1	0/0	0/0	1|1	0/0	0/0	0/0	0/0	0/0	0/0	1|1	0/0	0/0	0/0	0/0	C|missense_variant|MODERATE|OS01G0126401|OS01G0126401|transcript|OS01T0126401-01|protein_coding|1/1|c.148A>G|p.Ile50Val|3279/3910|148/498|50/165||,C|upstream_gene_variant|MODIFIER|OS01G0126600|OS01G0126600|transcript|OS01T0126600-01|protein_coding||c.-1520T>C|||||1518|WARNING_TRANSCRIPT_NO_START_CODON,C|downstream_gene_variant|MODIFIER|OS01G0126200|OS01G0126200|transcript|OS01T0126200-01|protein_…
chr01	1446199	A	ACGG	9923.01	0/0	0/0	0/0	0/0	1/1	0/0	1/1	1/1	0/0	1/1	0/0	0/0	1/1	0/0	0/0	0/0	0/0	0/0	0/0	1/1	0/0	0/0	0/0	0/0	ACGG|conservative_inframe_insertion|MODERATE|OS01G0126401|OS01G0126401|transcript|OS01T0126401-01|protein_coding|1/1|c.118_120dupCCG|p.Pro40dup|3251/3910|120/498|40/165||,ACGG|upstream_gene_variant|MODIFIER|OS01G0126600|OS01G0126600|transcript|OS01T0126600-01|protein_coding||c.-1493_-1492insCGG|||||1490|WARNING_TRANSCRIPT_NO_START_CODON,ACGG|downstream_gene_variant|MODIFIER|OS01G0126200|OS01G0126…
chr01	1446228	T	C	9641.98	0/0	0/0	0/0	0/0	1/1	0/0	1/1	1/1	0/0	1/1	0/0	0/0	1/1	0/0	0/0	0/0	0/0	0/0	0/0	1/1	0/0	0/0	0/0	0/0	C|missense_variant|MODERATE|OS01G0126401|OS01G0126401|transcript|OS01T0126401-01|protein_coding|1/1|c.92A>G|p.Gln31Arg|3223/3910|92/498|31/165||,C|upstream_gene_variant|MODIFIER|OS01G0126600|OS01G0126600|transcript|OS01T0126600-01|protein_coding||c.-1464T>C|||||1462|WARNING_TRANSCRIPT_NO_START_CODON,C|downstream_gene_variant|MODIFIER|OS01G0126200|OS01G0126200|transcript|OS01T0126200-01|protein_co…
chr01	1446270	G	A	11434	0/0	0/0	0/0	0/0	1|1	0/0	1|1	1|1	0/0	1|1	0/0	0/0	1|1	0/0	0/0	0/0	0/0	0/0	0/0	1|1	0/0	0/0	0/0	0/0	A|missense_variant|MODERATE|OS01G0126401|OS01G0126401|transcript|OS01T0126401-01|protein_coding|1/1|c.50C>T|p.Pro17Leu|3181/3910|50/498|17/165||,A|upstream_gene_variant|MODIFIER|OS01G0126600|OS01G0126600|transcript|OS01T0126600-01|protein_coding||c.-1422G>A|||||1420|WARNING_TRANSCRIPT_NO_START_CODON,A|downstream_gene_variant|MODIFIER|OS01G0126200|OS01G0126200|transcript|OS01T0126200-01|protein_co…
chr01	1449448	CTTGCACAATGTCTGCACG	C	13232	0/0	0/0	0/0	0/0	1/1	0/0	1/1	1/1	0/0	1/1	0/0	0/0	1/1	0/0	0/0	0/0	0/0	0/0	0/0	1/1	0/0	0/0	0/0	0/0	C|bidirectional_gene_fusion|HIGH|OS01G0126401&OS01G0126600|OS01G0126401&OS01G0126600|gene_variant|OS01G0126401|||n.1449466_1449449delCGTGCAGACATTGTGCAA||||||
chr01	1486728	T	C	7771.97	0/0	0/0	0/0	0/0	1/1	0/0	1/1	1/1	0/0	1/1	0/0	0/0	1/1	0/0	0/0	0/0	0/0	0/0	0/0	1/1	0/0	0/0	0/0	0/0	C|missense_variant|MODERATE|OS01G0126900|OS01G0126900|transcript|OS01T0126900-01|protein_coding|2/3|c.107T>C|p.Val36Ala|219/1909|107/1788|36/595||
chr01	1487879	C	T	11245	0/0	0/0	0/0	0/0	1/1	0/0	1/1	1/1	0/0	1/1	0/0	0/0	1/1	0/0	0/0	0/0	0/0	0/0	0/0	1/1	0/0	0/0	0/0	0/0	T|missense_variant|MODERATE|OS01G0126900|OS01G0126900|transcript|OS01T0126900-01|protein_coding|3/3|c.779C>T|p.Ser260Phe|891/1909|779/1788|260/595||
chr01	1487914	G	C	11853	0/0	0/0	0/0	0/0	1|1	0/0	1|1	1|1	0/0	1|1	0/0	0/0	1|1	0/0	0/0	0/0	0/0	0/0	0/0	1|1	0/0	0/0	0/0	0/0	C|missense_variant|MODERATE|OS01G0126900|OS01G0126900|transcript|OS01T0126900-01|protein_coding|3/3|c.814G>C|p.Ala272Pro|926/1909|814/1788|272/595||
chr01	1487915	C	A	11747	0/0	0/0	0/0	0/0	1|1	0/0	1|1	1|1	0/0	1|1	0/0	0/0	1|1	0/0	0/0	0/0	0/0	0/0	0/0	1|1	0/0	0/0	0/0	0/0	A|missense_variant|MODERATE|OS01G0126900|OS01G0126900|transcript|OS01T0126900-01|protein_coding|3/3|c.815C>A|p.Ala272Glu|927/1909|815/1788|272/595||
chr01	1488181	A	G	13291	0/0	0/0	0/0	0/0	1|1	0/0	1|1	1|1	0/0	1|1	0/0	0/0	1|1	0/0	0/0	0/0	0/0	0/0	0/0	1|1	0/0	0/0	0/0	0/0	G|missense_variant|MODERATE|OS01G0126900|OS01G0126900|transcript|OS01T0126900-01|protein_coding|3/3|c.1081A>G|p.Ile361Val|1193/1909|1081/1788|361/595||
chr01	1488190	C	A	13283	0/0	0/0	0/0	0/0	1|1	0/0	1|1	1|1	0/0	1|1	0/0	0/0	1|1	0/0	0/0	0/0	0/0	0/0	0/0	1|1	0/0	0/0	0/0	0/0	A|missense_variant|MODERATE|OS01G0126900|OS01G0126900|transcript|OS01T0126900-01|protein_coding|3/3|c.1090C>A|p.Leu364Ile|1202/1909|1090/1788|364/595||
chr01	1488262	A	G	11300	0/0	0/0	0/0	0/0	1|1	0/0	1|1	1|1	0/0	1|1	0/0	0/0	1|1	0/0	0/0	0/0	0/0	0/0	0/0	1|1	0/0	0/0	0/0	0/0	G|missense_variant|MODERATE|OS01G0126900|OS01G0126900|transcript|OS01T0126900-01|protein_coding|3/3|c.1162A>G|p.Ile388Val|1274/1909|1162/1788|388/595||
chr01	1488827	T	C	5765.52	0/0	0/0	0/0	0/0	1|1	0/0	./.	./.	0/0	./.	0/0	0/0	./.	0/0	0/0	0/0	0/0	0/0	0/0	1|1	0/0	0/0	0/0	0/0	C|missense_variant|MODERATE|OS01G0126900|OS01G0126900|transcript|OS01T0126900-01|protein_coding|3/3|c.1727T>C|p.Leu576Ser|1839/1909|1727/1788|576/595||,C|downstream_gene_variant|MODIFIER|OS01G0127000|OS01G0127000|transcript|OS01T0127000-01|protein_coding||c.*1971A>G|||||1667|WARNING_TRANSCRIPT_NO_START_CODON
chr01	1488829	A	C	5720.52	0/0	0/0	0/0	0/0	1|1	0/0	./.	./.	0/0	./.	0/0	0/0	./.	0/0	0/0	0/0	0/0	0/0	0/0	1|1	0/0	0/0	0/0	0/0	C|missense_variant|MODERATE|OS01G0126900|OS01G0126900|transcript|OS01T0126900-01|protein_coding|3/3|c.1729A>C|p.Asn577His|1841/1909|1729/1788|577/595||,C|downstream_gene_variant|MODIFIER|OS01G0127000|OS01G0127000|transcript|OS01T0127000-01|protein_coding||c.*1969T>G|||||1665|WARNING_TRANSCRIPT_NO_START_CODON
chr01	1488839	G	GC	5090.56	0/0	0/0	0/0	0/0	1|1	0/0	./.	./.	0/0	./.	0/0	0/0	./.	0/0	0/0	0/0	0/0	0/0	0/0	1|1	0/0	0/0	0/0	0/0	GC|frameshift_variant|HIGH|OS01G0126900|OS01G0126900|transcript|OS01T0126900-01|protein_coding|3/3|c.1739_1740insC|p.Leu581fs|1852/1909|1740/1788|580/595||,GC|downstream_gene_variant|MODIFIER|OS01G0127000|OS01G0127000|transcript|OS01T0127000-01|protein_coding||c.*1958_*1959insG|||||1654|WARNING_TRANSCRIPT_NO_START_CODON
chr01	1488841	C	G	5000.52	0/0	0/0	0/0	0/0	1|1	0/0	./.	./.	0/0	./.	0/0	0/0	./.	0/0	0/0	0/0	0/0	0/0	0/0	1|1	0/0	0/0	0/0	0/0	G|missense_variant|MODERATE|OS01G0126900|OS01G0126900|transcript|OS01T0126900-01|protein_coding|3/3|c.1741C>G|p.Leu581Val|1853/1909|1741/1788|581/595||,G|downstream_gene_variant|MODIFIER|OS01G0127000|OS01G0127000|transcript|OS01T0127000-01|protein_coding||c.*1957G>C|||||1653|WARNING_TRANSCRIPT_NO_START_CODON
chr01	1488845	C	A	4460.52	0/0	0/0	0/0	0/0	1|1	0/0	./.	./.	0/0	./.	0/0	0/0	./.	0/0	0/0	0/0	0/0	0/0	0/0	1|1	0/0	0/0	0/0	0/0	A|missense_variant|MODERATE|OS01G0126900|OS01G0126900|transcript|OS01T0126900-01|protein_coding|3/3|c.1745C>A|p.Ser582Tyr|1857/1909|1745/1788|582/595||,A|downstream_gene_variant|MODIFIER|OS01G0127000|OS01G0127000|transcript|OS01T0127000-01|protein_coding||c.*1953G>T|||||1649|WARNING_TRANSCRIPT_NO_START_CODON
chr01	1488850	T	TATCCAACTTCATCA	4010.56	0/0	0/0	0/0	0/0	1|1	0/0	./.	./.	0/0	./.	0/0	0/0	./.	0/0	0/0	0/0	0/0	0/0	0/0	1|1	0/0	0/0	0/0	0/0	TATCCAACTTCATCA|frameshift_variant|HIGH|OS01G0126900|OS01G0126900|transcript|OS01T0126900-01|protein_coding|3/3|c.1750_1751insATCCAACTTCATCA|p.Trp584fs|1863/1909|1751/1788|584/595||,TATCCAACTTCATCA|downstream_gene_variant|MODIFIER|OS01G0127000|OS01G0127000|transcript|OS01T0127000-01|protein_coding||c.*1947_*1948insTGATGAAGTTGGAT|||||1643|WARNING_TRANSCRIPT_NO_START_CODON
chr01	1488852	G	T	3875.52	0/0	0/0	0/0	0/0	1|1	0/0	./.	./.	0/0	./.	0/0	0/0	./.	0/0	0/0	0/0	0/0	0/0	0/0	1|1	0/0	0/0	0/0	0/0	T|missense_variant|MODERATE|OS01G0126900|OS01G0126900|transcript|OS01T0126900-01|protein_coding|3/3|c.1752G>T|p.Trp584Cys|1864/1909|1752/1788|584/595||,T|downstream_gene_variant|MODIFIER|OS01G0127000|OS01G0127000|transcript|OS01T0127000-01|protein_coding||c.*1946C>A|||||1642|WARNING_TRANSCRIPT_NO_START_CODON
chr01	1488853	G	GAC	3290.56	0/0	0/0	0/0	0/0	1|1	0/0	./.	./.	0/0	./.	0/0	0/0	./.	0/0	0/0	0/0	0/0	0/0	0/0	1|1	0/0	0/0	0/0	0/0	GAC|frameshift_variant|HIGH|OS01G0126900|OS01G0126900|transcript|OS01T0126900-01|protein_coding|3/3|c.1753_1754insAC|p.Val585fs|1866/1909|1754/1788|585/595||,GAC|downstream_gene_variant|MODIFIER|OS01G0127000|OS01G0127000|transcript|OS01T0127000-01|protein_coding||c.*1944_*1945insGT|||||1640|WARNING_TRANSCRIPT_NO_START_CODON
chr01	1488855	T	TG	3245.56	0/0	0/0	0/0	0/0	1|1	0/0	./.	./.	0/0	./.	0/0	0/0	./.	0/0	0/0	0/0	0/0	0/0	0/0	1|1	0/0	0/0	0/0	0/0	TG|frameshift_variant|HIGH|OS01G0126900|OS01G0126900|transcript|OS01T0126900-01|protein_coding|3/3|c.1755_1756insG|p.Asn586fs|1868/1909|1756/1788|586/595||,TG|downstream_gene_variant|MODIFIER|OS01G0127000|OS01G0127000|transcript|OS01T0127000-01|protein_coding||c.*1942_*1943insC|||||1638|WARNING_TRANSCRIPT_NO_START_CODON
chr01	1488857	A	T	3152.52	0/0	0/0	0/0	0/0	1|1	0/0	./.	./.	0/0	./.	0/0	0/0	./.	0/0	0/0	0/0	0/0	0/0	0/0	1|1	0/0	0/0	0/0	0/0	T|missense_variant|MODERATE|OS01G0126900|OS01G0126900|transcript|OS01T0126900-01|protein_coding|3/3|c.1757A>T|p.Asn586Ile|1869/1909|1757/1788|586/595||,T|downstream_gene_variant|MODIFIER|OS01G0127000|OS01G0127000|transcript|OS01T0127000-01|protein_coding||c.*1941T>A|||||1637|WARNING_TRANSCRIPT_NO_START_CODON
chr01	1488876	T	TTA	2026.78	0/0	0/0	0/0	0/0	1|1	0/0	./.	0/0	0/0	./.	0/0	0/0	./.	0/0	0/0	0/0	0/0	0/0	0/0	1|1	0/0	0/0	0/0	0/0	TTA|frameshift_variant|HIGH|OS01G0126900|OS01G0126900|transcript|OS01T0126900-01|protein_coding|3/3|c.1780_1781dupAT|p.Met594fs|1894/1909|1782/1788|594/595||INFO_REALIGN_3_PRIME,TTA|downstream_gene_variant|MODIFIER|OS01G0127000|OS01G0127000|transcript|OS01T0127000-01|protein_coding||c.*1920_*1921dupTA|||||1617|WARNING_TRANSCRIPT_NO_START_CODON
chr01	1488893	ATTTG	A	1657.55	0/0	0/0	0/0	0/0	1|1	0/0	./.	./.	0/0	./.	0/0	0/0	./.	0/0	0/0	0/0	0/0	0/0	0/0	1|1	0/0	0/0	0/0	0/0	A|frameshift_variant|HIGH|OS01G0126900|OS01G0126900|transcript|OS01T0126900-01|protein_coding|3/3|c.1781_1784delTTTG|p.Met594fs|1893/1909|1781/1788|594/595||INFO_REALIGN_3_PRIME,A|downstream_gene_variant|MODIFIER|OS01G0127000|OS01G0127000|transcript|OS01T0127000-01|protein_coding||c.*1901_*1904delCAAA|||||1600|WARNING_TRANSCRIPT_NO_START_CODON
chr01	1490802	G	C	11024	0/0	0/0	0/0	0/0	1/1	0/0	1/1	1/1	0/0	1/1	0/0	0/0	1/1	0/0	0/0	0/0	0/0	0/0	0/0	1/1	0/0	0/0	0/0	0/0	C|missense_variant|MODERATE|OS01G0127000|OS01G0127000|transcript|OS01T0127000-01|protein_coding|2/2|c.1361C>G|p.Pro454Arg|1361/1669|1361/1365|454/454||WARNING_TRANSCRIPT_NO_START_CODON,C|upstream_gene_variant|MODIFIER|OS01G0127100|OS01G0127100|transcript|OS01T0127100-01|protein_coding||c.-274G>C|||||191|,C|downstream_gene_variant|MODIFIER|OS01G0126900|OS01G0126900|transcript|OS01T0126900-01|prote…
chr01	1491202	T	C	13583	0/0	0/0	0/0	0/0	1|1	0/0	1|1	1|1	0/0	1|1	0/0	0/0	1|1	0/0	0/0	0/0	0/0	0/0	0/0	1|1	0/0	0/0	0/0	0/0	C|missense_variant|MODERATE|OS01G0127000|OS01G0127000|transcript|OS01T0127000-01|protein_coding|1/2|c.1133A>G|p.Asp378Gly|1133/1669|1133/1365|378/454||WARNING_TRANSCRIPT_NO_START_CODON,C|missense_variant|MODERATE|OS01G0127100|OS01G0127100|transcript|OS01T0127100-01|protein_coding|1/1|c.127T>C|p.Ser43Pro|210/1688|127/342|43/113||
chr01	1491203	C	T	13583	0/0	0/0	0/0	0/0	1|1	0/0	1|1	1|1	0/0	1|1	0/0	0/0	1|1	0/0	0/0	0/0	0/0	0/0	0/0	1|1	0/0	0/0	0/0	0/0	T|missense_variant|MODERATE|OS01G0127000|OS01G0127000|transcript|OS01T0127000-01|protein_coding|1/2|c.1132G>A|p.Asp378Asn|1132/1669|1132/1365|378/454||WARNING_TRANSCRIPT_NO_START_CODON,T|missense_variant|MODERATE|OS01G0127100|OS01G0127100|transcript|OS01T0127100-01|protein_coding|1/1|c.128C>T|p.Ser43Leu|211/1688|128/342|43/113||
chr01	1491218	A	C	12272	0/0	0/0	0/0	0/0	1/1	0/0	1/1	1/1	0/0	1/1	0/0	0/0	1/1	0/0	0/0	0/0	0/0	0/0	0/0	1/1	0/0	0/0	0/0	0/0	C|missense_variant|MODERATE|OS01G0127000|OS01G0127000|transcript|OS01T0127000-01|protein_coding|1/2|c.1117T>G|p.Phe373Val|1117/1669|1117/1365|373/454||WARNING_TRANSCRIPT_NO_START_CODON,C|missense_variant|MODERATE|OS01G0127100|OS01G0127100|transcript|OS01T0127100-01|protein_coding|1/1|c.143A>C|p.Lys48Thr|226/1688|143/342|48/113||
chr01	1491233	T	G	12170	0/0	0/0	0/0	0/0	1/1	0/0	1/1	1/1	0/0	1/1	0/0	0/0	1/1	0/0	0/0	0/0	0/0	0/0	0/0	1/1	0/0	0/0	0/0	0/0	G|missense_variant|MODERATE|OS01G0127000|OS01G0127000|transcript|OS01T0127000-01|protein_coding|1/2|c.1102A>C|p.Lys368Gln|1102/1669|1102/1365|368/454||WARNING_TRANSCRIPT_NO_START_CODON,G|missense_variant|MODERATE|OS01G0127100|OS01G0127100|transcript|OS01T0127100-01|protein_coding|1/1|c.158T>G|p.Phe53Cys|241/1688|158/342|53/113||
chr01	1491244	C	G	13439	0/0	0/0	0/0	0/0	1|1	0/0	1|1	1|1	0/0	1|1	0/0	0/0	1|1	0/0	0/0	0/0	0/0	0/0	0/0	1|1	0/0	0/0	0/0	0/0	G|missense_variant|MODERATE|OS01G0127000|OS01G0127000|transcript|OS01T0127000-01|protein_coding|1/2|c.1091G>C|p.Ser364Thr|1091/1669|1091/1365|364/454||WARNING_TRANSCRIPT_NO_START_CODON,G|missense_variant|MODERATE|OS01G0127100|OS01G0127100|transcript|OS01T0127100-01|protein_coding|1/1|c.169C>G|p.Leu57Val|252/1688|169/342|57/113||
chr01	1491253	G	A	13825	0/0	0/0	0/0	0/0	1|1	0/0	1|1	1|1	0/0	1|1	0/0	0/0	1|1	0/0	0/0	0/0	0/0	0/0	0/0	1|1	0/0	0/0	0/0	0/0	A|missense_variant|MODERATE|OS01G0127000|OS01G0127000|transcript|OS01T0127000-01|protein_coding|1/2|c.1082C>T|p.Thr361Ile|1082/1669|1082/1365|361/454||WARNING_TRANSCRIPT_NO_START_CODON,A|missense_variant|MODERATE|OS01G0127100|OS01G0127100|transcript|OS01T0127100-01|protein_coding|1/1|c.178G>A|p.Val60Met|261/1688|178/342|60/113||
chr01	1491541	A	G	11823	0/0	0/0	0/0	0/0	1|1	0/0	1|1	1|1	0/0	1|1	0/0	0/0	1|1	0/0	0/0	0/0	0/0	0/0	0/0	1|1	0/0	0/0	0/0	0/0	G|missense_variant|MODERATE|OS01G0127000|OS01G0127000|transcript|OS01T0127000-01|protein_coding|1/2|c.794T>C|p.Val265Ala|794/1669|794/1365|265/454||WARNING_TRANSCRIPT_NO_START_CODON,G|3_prime_UTR_variant|MODIFIER|OS01G0127100|OS01G0127100|transcript|OS01T0127100-01|protein_coding|1/1|c.*124A>G|||||124|
chr01	1491544	A	G	12183	0/0	0/0	0/0	0/0	1|1	0/0	1|1	1|1	0/0	1|1	0/0	0/0	1|1	0/0	0/0	0/0	0/0	0/0	0/0	1|1	0/0	0/0	0/0	0/0	G|missense_variant|MODERATE|OS01G0127000|OS01G0127000|transcript|OS01T0127000-01|protein_coding|1/2|c.791T>C|p.Val264Ala|791/1669|791/1365|264/454||WARNING_TRANSCRIPT_NO_START_CODON,G|3_prime_UTR_variant|MODIFIER|OS01G0127100|OS01G0127100|transcript|OS01T0127100-01|protein_coding|1/1|c.*127A>G|||||127|
chr01	1491545	C	T	12075	0/0	0/0	0/0	0/0	1|1	0/0	1|1	1|1	0/0	1|1	0/0	0/0	1|1	0/0	0/0	0/0	0/0	0/0	0/0	1|1	0/0	0/0	0/0	0/0	T|missense_variant|MODERATE|OS01G0127000|OS01G0127000|transcript|OS01T0127000-01|protein_coding|1/2|c.790G>A|p.Val264Met|790/1669|790/1365|264/454||WARNING_TRANSCRIPT_NO_START_CODON,T|3_prime_UTR_variant|MODIFIER|OS01G0127100|OS01G0127100|transcript|OS01T0127100-01|protein_coding|1/1|c.*128C>T|||||128|
chr01	1491555	T	G	11956	0/0	0/0	0/0	0/0	1|1	0/0	1|1	1|1	0/0	1|1	0/0	0/0	1|1	0/0	0/0	0/0	0/0	0/0	0/0	1|1	0/0	0/0	0/0	0/0	G|missense_variant|MODERATE|OS01G0127000|OS01G0127000|transcript|OS01T0127000-01|protein_coding|1/2|c.780A>C|p.Glu260Asp|780/1669|780/1365|260/454||WARNING_TRANSCRIPT_NO_START_CODON,G|3_prime_UTR_variant|MODIFIER|OS01G0127100|OS01G0127100|transcript|OS01T0127100-01|protein_coding|1/1|c.*138T>G|||||138|
chr01	1491556	T	A	11998	0/0	0/0	0/0	0/0	1|1	0/0	1|1	1|1	0/0	1|1	0/0	0/0	1|1	0/0	0/0	0/0	0/0	0/0	0/0	1|1	0/0	0/0	0/0	0/0	A|missense_variant|MODERATE|OS01G0127000|OS01G0127000|transcript|OS01T0127000-01|protein_coding|1/2|c.779A>T|p.Glu260Val|779/1669|779/1365|260/454||WARNING_TRANSCRIPT_NO_START_CODON,A|3_prime_UTR_variant|MODIFIER|OS01G0127100|OS01G0127100|transcript|OS01T0127100-01|protein_coding|1/1|c.*139T>A|||||139|
chr01	1491565	T	G	11307.1	0/0	0/0	0/0	0/0	1|1	0/0	1|1	1|1	0/0	1|1	0/0	0/0	1|1	0/0	0/0	0/0	0/0	0/0	0/0	1|1	0/0	0/0	0/0	0/0	G|missense_variant|MODERATE|OS01G0127000|OS01G0127000|transcript|OS01T0127000-01|protein_coding|1/2|c.770A>C|p.Gln257Pro|770/1669|770/1365|257/454||WARNING_TRANSCRIPT_NO_START_CODON,G|3_prime_UTR_variant|MODIFIER|OS01G0127100|OS01G0127100|transcript|OS01T0127100-01|protein_coding|1/1|c.*148T>G|||||148|
chr01	1491587	C	G	8454.02	0/0	0/0	0/0	0/0	1/1	0/0	1/1	1/1	0/0	1/1	0/0	0/0	1/1	0/0	0/0	0/0	0/0	0/0	0/0	1/1	0/0	0/0	0/0	0/0	G|missense_variant|MODERATE|OS01G0127000|OS01G0127000|transcript|OS01T0127000-01|protein_coding|1/2|c.748G>C|p.Val250Leu|748/1669|748/1365|250/454||WARNING_TRANSCRIPT_NO_START_CODON,G|3_prime_UTR_variant|MODIFIER|OS01G0127100|OS01G0127100|transcript|OS01T0127100-01|protein_coding|1/1|c.*170C>G|||||170|
chr01	1491633	T	TGA	11750	0/0	0/0	0/0	0/0	1|1	0/0	1|1	1|1	0/0	1|1	0/0	0/0	1|1	0/0	0/0	0/0	0/0	0/0	0/0	1|1	0/0	0/0	0/0	0/0	TGA|frameshift_variant|HIGH|OS01G0127000|OS01G0127000|transcript|OS01T0127000-01|protein_coding|1/2|c.701_702insTC|p.Leu235fs|701/1669|701/1365|234/454||WARNING_TRANSCRIPT_NO_START_CODON,TGA|3_prime_UTR_variant|MODIFIER|OS01G0127100|OS01G0127100|transcript|OS01T0127100-01|protein_coding|1/1|c.*217_*218insAG|||||218|INFO_REALIGN_3_PRIME
chr01	1491635	TCG	T	11980	0/0	0/0	0/0	0/0	1|1	0/0	1|1	1|1	0/0	1|1	0/0	0/0	1|1	0/0	0/0	0/0	0/0	0/0	0/0	1|1	0/0	0/0	0/0	0/0	T|frameshift_variant|HIGH|OS01G0127000|OS01G0127000|transcript|OS01T0127000-01|protein_coding|1/2|c.698_699delCG|p.Ala233fs|699/1669|698/1365|233/454||WARNING_TRANSCRIPT_NO_START_CODON,T|3_prime_UTR_variant|MODIFIER|OS01G0127100|OS01G0127100|transcript|OS01T0127100-01|protein_coding|1/1|c.*221_*222delCG|||||221|INFO_REALIGN_3_PRIME
chr01	1491644	C	T	11871	0/0	0/0	0/0	0/0	1|1	0/0	1|1	1|1	0/0	1|1	0/0	0/0	1|1	0/0	0/0	0/0	0/0	0/0	0/0	1|1	0/0	0/0	0/0	0/0	T|missense_variant|MODERATE|OS01G0127000|OS01G0127000|transcript|OS01T0127000-01|protein_coding|1/2|c.691G>A|p.Ala231Thr|691/1669|691/1365|231/454||WARNING_TRANSCRIPT_NO_START_CODON,T|3_prime_UTR_variant|MODIFIER|OS01G0127100|OS01G0127100|transcript|OS01T0127100-01|protein_coding|1/1|c.*227C>T|||||227|
chr01	1492000	A	G	12620	0/0	0/0	0/0	0/0	1|1	0/0	1|1	1|1	0/0	1|1	0/0	0/0	1|1	0/0	0/0	0/0	0/0	0/0	0/0	1|1	0/0	0/0	0/0	0/0	G|missense_variant|MODERATE|OS01G0127000|OS01G0127000|transcript|OS01T0127000-01|protein_coding|1/2|c.335T>C|p.Val112Ala|335/1669|335/1365|112/454||WARNING_TRANSCRIPT_NO_START_CODON,G|3_prime_UTR_variant|MODIFIER|OS01G0127100|OS01G0127100|transcript|OS01T0127100-01|protein_coding|1/1|c.*583A>G|||||583|
chr01	1492001	C	T	12440	0/0	0/0	0/0	0/0	1|1	0/0	1|1	1|1	0/0	1|1	0/0	0/0	1|1	0/0	0/0	0/0	0/0	0/0	0/0	1|1	0/0	0/0	0/0	0/0	T|missense_variant|MODERATE|OS01G0127000|OS01G0127000|transcript|OS01T0127000-01|protein_coding|1/2|c.334G>A|p.Val112Ile|334/1669|334/1365|112/454||WARNING_TRANSCRIPT_NO_START_CODON,T|3_prime_UTR_variant|MODIFIER|OS01G0127100|OS01G0127100|transcript|OS01T0127100-01|protein_coding|1/1|c.*584C>T|||||584|
chr01	1492004	T	A	12125	0/0	0/0	0/0	0/0	1|1	0/0	1|1	1|1	0/0	1|1	0/0	0/0	1|1	0/0	0/0	0/0	0/0	0/0	0/0	1|1	0/0	0/0	0/0	0/0	A|missense_variant|MODERATE|OS01G0127000|OS01G0127000|transcript|OS01T0127000-01|protein_coding|1/2|c.331A>T|p.Thr111Ser|331/1669|331/1365|111/454||WARNING_TRANSCRIPT_NO_START_CODON,A|3_prime_UTR_variant|MODIFIER|OS01G0127100|OS01G0127100|transcript|OS01T0127100-01|protein_coding|1/1|c.*587T>A|||||587|
chr01	1492007	C	T	12080	0/0	0/0	0/0	0/0	1|1	0/0	1|1	1|1	0/0	1|1	0/0	0/0	1|1	0/0	0/0	0/0	0/0	0/0	0/0	1|1	0/0	0/0	0/0	0/0	T|missense_variant|MODERATE|OS01G0127000|OS01G0127000|transcript|OS01T0127000-01|protein_coding|1/2|c.328G>A|p.Asp110Asn|328/1669|328/1365|110/454||WARNING_TRANSCRIPT_NO_START_CODON,T|3_prime_UTR_variant|MODIFIER|OS01G0127100|OS01G0127100|transcript|OS01T0127100-01|protein_coding|1/1|c.*590C>T|||||590|
chr01	1492012	A	T	12305	0/0	0/0	0/0	0/0	1|1	0/0	1|1	1|1	0/0	1|1	0/0	0/0	1|1	0/0	0/0	0/0	0/0	0/0	0/0	1|1	0/0	0/0	0/0	0/0	T|missense_variant|MODERATE|OS01G0127000|OS01G0127000|transcript|OS01T0127000-01|protein_coding|1/2|c.323T>A|p.Phe108Tyr|323/1669|323/1365|108/454||WARNING_TRANSCRIPT_NO_START_CODON,T|3_prime_UTR_variant|MODIFIER|OS01G0127100|OS01G0127100|transcript|OS01T0127100-01|protein_coding|1/1|c.*595A>T|||||595|
chr01	1492027	A	G	12485	0/0	0/0	0/0	0/0	1|1	0/0	1|1	1|1	0/0	1|1	0/0	0/0	1|1	0/0	0/0	0/0	0/0	0/0	0/0	1|1	0/0	0/0	0/0	0/0	G|missense_variant|MODERATE|OS01G0127000|OS01G0127000|transcript|OS01T0127000-01|protein_coding|1/2|c.308T>C|p.Val103Ala|308/1669|308/1365|103/454||WARNING_TRANSCRIPT_NO_START_CODON,G|3_prime_UTR_variant|MODIFIER|OS01G0127100|OS01G0127100|transcript|OS01T0127100-01|protein_coding|1/1|c.*610A>G|||||610|
chr01	1492037	T	G	12665	0/0	0/0	0/0	0/0	1|1	0/0	1|1	1|1	0/0	1|1	0/0	0/0	1|1	0/0	0/0	0/0	0/0	0/0	0/0	1|1	0/0	0/0	0/0	0/0	G|missense_variant|MODERATE|OS01G0127000|OS01G0127000|transcript|OS01T0127000-01|protein_coding|1/2|c.298A>C|p.Lys100Gln|298/1669|298/1365|100/454||WARNING_TRANSCRIPT_NO_START_CODON,G|3_prime_UTR_variant|MODIFIER|OS01G0127100|OS01G0127100|transcript|OS01T0127100-01|protein_coding|1/1|c.*620T>G|||||620|
chr01	1492280	A	G	13339	0/0	0/0	0/0	0/0	1|1	0/0	1|1	1|1	0/0	1|1	0/0	0/0	1|1	0/0	0/0	0/0	0/0	0/0	0/0	1|1	0/0	0/0	0/0	0/0	G|missense_variant|MODERATE|OS01G0127000|OS01G0127000|transcript|OS01T0127000-01|protein_coding|1/2|c.55T>C|p.Phe19Leu|55/1669|55/1365|19/454||WARNING_TRANSCRIPT_NO_START_CODON,G|3_prime_UTR_variant|MODIFIER|OS01G0127100|OS01G0127100|transcript|OS01T0127100-01|protein_coding|1/1|c.*863A>G|||||863|
chr01	1497864	T	G	12622	0/0	0/0	0/0	0/0	1|1	0/0	1|1	1|1	0/0	1|1	0/0	0/0	1|1	0/0	0/0	0/0	0/0	0/0	0/0	1|1	0/0	0/0	0/0	0/0	G|missense_variant|MODERATE|OS01G0127200|OS01G0127200|transcript|OS01T0127200-01|protein_coding|3/4|c.1682A>C|p.Asp561Ala|1754/2288|1682/1914|561/637||
chr01	1497865	C	T	12622	0/0	0/0	0/0	0/0	1|1	0/0	1|1	1|1	0/0	1|1	0/0	0/0	1|1	0/0	0/0	0/0	0/0	0/0	0/0	1|1	0/0	0/0	0/0	0/0	T|missense_variant|MODERATE|OS01G0127200|OS01G0127200|transcript|OS01T0127200-01|protein_coding|3/4|c.1681G>A|p.Asp561Asn|1753/2288|1681/1914|561/637||
chr01	1497893	T	G	13686	0/0	0/0	0/0	0/0	1|1	0/0	1|1	1|1	0/0	1|1	0/0	0/0	1|1	0/0	0/0	0/0	0/0	0/0	0/0	1|1	0/0	0/0	0/0	0/0	G|missense_variant|MODERATE|OS01G0127200|OS01G0127200|transcript|OS01T0127200-01|protein_coding|3/4|c.1653A>C|p.Lys551Asn|1725/2288|1653/1914|551/637||
chr01	1497894	T	G	13776	0/0	0/0	0/0	0/0	1|1	0/0	1|1	1|1	0/0	1|1	0/0	0/0	1|1	0/0	0/0	0/0	0/0	0/0	0/0	1|1	0/0	0/0	0/0	0/0	G|missense_variant|MODERATE|OS01G0127200|OS01G0127200|transcript|OS01T0127200-01|protein_coding|3/4|c.1652A>C|p.Lys551Thr|1724/2288|1652/1914|551/637||
chr01	1497895	T	C	13956	0/0	0/0	0/0	0/0	1|1	0/0	1|1	1|1	0/0	1|1	0/0	0/0	1|1	0/0	0/0	0/0	0/0	0/0	0/0	1|1	0/0	0/0	0/0	0/0	C|missense_variant|MODERATE|OS01G0127200|OS01G0127200|transcript|OS01T0127200-01|protein_coding|3/4|c.1651A>G|p.Lys551Glu|1723/2288|1651/1914|551/637||
chr01	1497906	T	G	14713	0/0	0/0	0/0	0/0	1|1	0/0	1|1	1|1	0/0	1|1	0/0	0/0	1|1	0/0	0/0	0/0	0/0	0/0	0/0	1|1	0/0	0/0	0/0	0/0	G|missense_variant|MODERATE|OS01G0127200|OS01G0127200|transcript|OS01T0127200-01|protein_coding|3/4|c.1640A>C|p.Asp547Ala|1712/2288|1640/1914|547/637||
chr01	1497907	C	T	14777	0/0	0/0	0/0	0/0	1|1	0/0	1|1	1|1	0/0	1|1	0/0	0/0	1|1	0/0	0/0	0/0	0/0	0/0	0/0	1|1	0/0	0/0	0/0	0/0	T|missense_variant|MODERATE|OS01G0127200|OS01G0127200|transcript|OS01T0127200-01|protein_coding|3/4|c.1639G>A|p.Asp547Asn|1711/2288|1639/1914|547/637||
chr01	1497915	A	T	14480	0/0	0/0	0/0	0/0	1|1	0/0	1|1	1|1	0/0	1|1	0/0	0/0	1|1	0/0	0/0	0/0	0/0	0/0	0/0	1|1	0/0	0/0	0/0	0/0	T|missense_variant|MODERATE|OS01G0127200|OS01G0127200|transcript|OS01T0127200-01|protein_coding|3/4|c.1631T>A|p.Val544Glu|1703/2288|1631/1914|544/637||
chr01	1497946	T	C	14709	0/0	0/0	0/0	0/0	1|1	0/0	1|1	1|1	0/0	1|1	0/0	0/0	1|1	0/0	0/0	0/0	0/0	0/0	0/0	1/1	0/0	0/0	0/0	0/0	C|missense_variant|MODERATE|OS01G0127200|OS01G0127200|transcript|OS01T0127200-01|protein_coding|3/4|c.1600A>G|p.Ile534Val|1672/2288|1600/1914|534/637||
chr01	1498268	CACA	C	13898	0/0	0/0	0/0	0/0	1|1	0/0	1|1	1|1	0/0	1|1	0/0	0/0	1|1	0/0	0/0	0/0	0/0	0/0	0/0	1|1	0/0	0/0	0/0	0/0	C|disruptive_inframe_deletion|MODERATE|OS01G0127200|OS01G0127200|transcript|OS01T0127200-01|protein_coding|3/4|c.1275_1277delTGT|p.Asn425_Val426delinsLys|1349/2288|1275/1914|425/637||
chr01	1498273	T	G	13943	0/0	0/0	0/0	0/0	1|1	0/0	1|1	1|1	0/0	1|1	0/0	0/0	1|1	0/0	0/0	0/0	0/0	0/0	0/0	1|1	0/0	0/0	0/0	0/0	G|missense_variant|MODERATE|OS01G0127200|OS01G0127200|transcript|OS01T0127200-01|protein_coding|3/4|c.1273A>C|p.Asn425His|1345/2288|1273/1914|425/637||
chr01	1498276	G	T	13729	0/0	0/0	0/0	0/0	1|1	0/0	1|1	1|1	0/0	1|1	0/0	0/0	1|1	0/0	0/0	0/0	0/0	0/0	0/0	1|1	0/0	0/0	0/0	0/0	T|missense_variant|MODERATE|OS01G0127200|OS01G0127200|transcript|OS01T0127200-01|protein_coding|3/4|c.1270C>A|p.Pro424Thr|1342/2288|1270/1914|424/637||
chr01	1498327	T	C	9928.97	0/0	0/0	0/0	0/0	1/1	0/0	1/1	1/1	0/0	1/1	0/0	0/0	1/1	0/0	0/0	0/0	0/0	0/0	0/0	1/1	0/0	0/0	0/0	0/0	C|missense_variant|MODERATE|OS01G0127200|OS01G0127200|transcript|OS01T0127200-01|protein_coding|3/4|c.1219A>G|p.Met407Val|1291/2288|1219/1914|407/637||
chr01	1498529	C	G	10732	0/0	0/0	0/0	0/0	1|1	0/0	1|1	1|1	0/0	1|1	0/0	0/0	1|1	0/0	0/0	0/0	0/0	0/0	0/0	1|1	0/0	0/0	0/0	0/0	G|missense_variant|MODERATE|OS01G0127200|OS01G0127200|transcript|OS01T0127200-01|protein_coding|3/4|c.1017G>C|p.Gln339His|1089/2288|1017/1914|339/637||
chr01	1498683	T	C	9196.98	0/0	0/0	0/0	0/0	1|1	0/0	1|1	1|1	0/0	1|1	0/0	0/0	1|1	0/0	0/0	0/0	0/0	0/0	0/0	1|1	0/0	0/0	0/0	0/0	C|missense_variant|MODERATE|OS01G0127200|OS01G0127200|transcript|OS01T0127200-01|protein_coding|3/4|c.863A>G|p.Asn288Ser|935/2288|863/1914|288/637||
chr01	1498692	T	G	9328.98	0/0	0/0	0/0	0/0	1|1	0/0	1|1	1|1	0/0	1|1	0/0	0/0	1|1	0/0	0/0	0/0	0/0	0/0	0/0	1|1	0/0	0/0	0/0	0/0	G|missense_variant|MODERATE|OS01G0127200|OS01G0127200|transcript|OS01T0127200-01|protein_coding|3/4|c.854A>C|p.Asp285Ala|926/2288|854/1914|285/637||
chr01	1500023	A	C	9285.98	0/0	0/0	0/0	0/0	1/1	0/0	1/1	1/1	0/0	1/1	0/0	0/0	1/1	0/0	0/0	0/0	0/0	0/0	0/0	1/1	0/0	0/0	0/0	0/0	C|missense_variant|MODERATE|OS01G0127200|OS01G0127200|transcript|OS01T0127200-01|protein_coding|2/4|c.319T>G|p.Ser107Ala|391/2288|319/1914|107/637||
chr01	1500105	CGGT	C	4745.97	0/0	0/0	0/0	0/0	1|1	0/0	1|1	1|1	0/0	1|1	0/0	0/0	1|1	0/0	0/0	0/0	0/0	0/0	0/0	1|1	0/0	0/0	0/0	0/0	C|disruptive_inframe_deletion|MODERATE|OS01G0127200|OS01G0127200|transcript|OS01T0127200-01|protein_coding|2/4|c.234_236delACC|p.Pro79del|308/2288|234/1914|78/637||
chr01	1500117	C	CTCG	4413.96	0/0	0/0	0/0	0/0	1/1	0/0	1/1	1/1	0/0	1/1	0/0	0/0	1/1	0/0	0/0	0/0	0/0	0/0	0/0	1/1	0/0	0/0	0/0	0/0	CTCG|disruptive_inframe_insertion|MODERATE|OS01G0127200|OS01G0127200|transcript|OS01T0127200-01|protein_coding|2/4|c.222_224dupCGA|p.Asp74dup|296/2288|224/1914|75/637||
chr01	1500274	C	T	15503	0/0	0/0	0/0	0/0	1|1	0/0	1|1	1|1	0/0	1|1	0/0	0/0	1|1	0/0	0/0	0/0	0/0	0/0	0/0	1|1	0/0	0/0	0/0	0/0	T|missense_variant|MODERATE|OS01G0127200|OS01G0127200|transcript|OS01T0127200-01|protein_coding|2/4|c.68G>A|p.Arg23Lys|140/2288|68/1914|23/637||
chr01	1507320	C	T	10210	0/0	0/0	0/0	0/0	1/1	0/0	1/1	1/1	0/0	1/1	0/0	0/0	1/1	0/0	0/0	0/0	0/0	0/0	0/0	1/1	0/0	0/0	0/0	0/0	T|missense_variant|MODERATE|OS01G0127300|OS01G0127300|transcript|OS01T0127300-01|protein_coding|1/3|c.709G>A|p.Ala237Thr|738/1695|709/1449|237/482||,T|upstream_gene_variant|MODIFIER|OS01G0127400|OS01G0127400|transcript|OS01T0127400-00|protein_coding||c.-910C>T|||||893|
chr01	1507689	G	A	7700.98	0/0	0/0	0/0	0/0	1/1	0/0	1/1	1/1	0/0	1/1	0/0	0/0	1/1	0/0	0/0	0/0	0/0	0/0	0/0	1/1	0/0	0/0	0/0	0/0	A|missense_variant|MODERATE|OS01G0127300|OS01G0127300|transcript|OS01T0127300-01|protein_coding|1/3|c.340C>T|p.Pro114Ser|369/1695|340/1449|114/482||,A|upstream_gene_variant|MODIFIER|OS01G0127400|OS01G0127400|transcript|OS01T0127400-00|protein_coding||c.-541G>A|||||524|
chr01	1510625	A	G	14679	0/0	0/0	0/0	0/0	1/1	0/0	1/1	1/1	0/0	1/1	0/0	0/0	1/1	0/0	0/0	0/0	0/0	0/0	0/0	1/1	0/0	0/0	0/0	0/0	G|missense_variant|MODERATE|OS01G0127400|OS01G0127400|transcript|OS01T0127400-00|protein_coding|8/8|c.1220A>G|p.Lys407Arg|1237/1383|1220/1275|407/424||,G|upstream_gene_variant|MODIFIER|OS01G0127450|OS01G0127450|transcript|OS01T0127450-00|protein_coding||c.-1339A>G|||||1339|
chr01	1511979	C	G	14036	0/0	0/0	0/0	0/0	1/1	0/0	1/1	1/1	0/0	1/1	0/0	0/0	1/1	0/0	0/0	0/0	0/0	0/0	0/0	1/1	0/0	0/0	0/0	0/0	G|missense_variant|MODERATE|OS01G0127450|OS01G0127450|transcript|OS01T0127450-00|protein_coding|1/2|c.16C>G|p.Arg6Gly|16/573|16/573|6/190||,G|upstream_gene_variant|MODIFIER|OS01G0127500|OS01G0127500|transcript|OS01T0127500-01|protein_coding||c.-1202C>G|||||1159|,G|downstream_gene_variant|MODIFIER|OS01G0127400|OS01G0127400|transcript|OS01T0127400-00|protein_coding||c.*1299C>G|||||1208|,G|downstrea…
chr01	1512102	G	A	13946	0/0	0/0	0/0	0/0	1|1	0/0	1|1	1|1	0/0	1|1	0/0	0/0	1|1	0/0	0/0	0/0	0/0	0/0	0/0	1|1	0/0	0/0	0/0	0/0	A|missense_variant|MODERATE|OS01G0127450|OS01G0127450|transcript|OS01T0127450-00|protein_coding|1/2|c.139G>A|p.Glu47Lys|139/573|139/573|47/190||,A|upstream_gene_variant|MODIFIER|OS01G0127500|OS01G0127500|transcript|OS01T0127500-01|protein_coding||c.-1079G>A|||||1036|,A|downstream_gene_variant|MODIFIER|OS01G0127400|OS01G0127400|transcript|OS01T0127400-00|protein_coding||c.*1422G>A|||||1331|,A|down…
chr01	1513253	A	G	9944.14	0/0	0/0	0/0	0/0	1/1	0/0	1/1	1/1	0/0	1/1	0/0	0/0	1/1	0/0	0/0	0/0	0/0	0/0	0/0	1/1	0/0	0/0	0/0	0/0	G|missense_variant|MODERATE|OS01G0127500|OS01G0127500|transcript|OS01T0127500-01|protein_coding|1/2|c.73A>G|p.Ser25Gly|116/1209|73/1014|25/337||,G|upstream_gene_variant|MODIFIER|EPlOSAG00000027109|EPlOSAG00000027109|transcript|EPlOSAT00000028497|lincRNA||n.-354T>C|||||354|,G|downstream_gene_variant|MODIFIER|OS01G0127450|OS01G0127450|transcript|OS01T0127450-00|protein_coding||c.*607A>G|||||607|
chr01	1513435	G	A	16363	0/0	0/0	0/0	0/0	1|1	0/0	1|1	1|1	0/0	1|1	0/0	0/0	1|1	0/0	0/0	0/0	0/0	0/0	0/0	1|1	0/0	0/0	0/0	0/0	A|missense_variant|MODERATE|OS01G0127500|OS01G0127500|transcript|OS01T0127500-01|protein_coding|2/2|c.169G>A|p.Val57Met|212/1209|169/1014|57/337||,A|upstream_gene_variant|MODIFIER|EPlOSAG00000027109|EPlOSAG00000027109|transcript|EPlOSAT00000028497|lincRNA||n.-536C>T|||||536|,A|downstream_gene_variant|MODIFIER|OS01G0127450|OS01G0127450|transcript|OS01T0127450-00|protein_coding||c.*789G>A|||||789|
chr01	1513534	A	G	12464	0/0	0/0	0/0	0/0	1|1	0/0	1|1	1|1	0/0	1|1	0/0	0/0	1|1	0/0	0/0	0/0	0/0	0/0	0/0	1|1	0/0	0/0	0/0	0/0	G|missense_variant|MODERATE|OS01G0127500|OS01G0127500|transcript|OS01T0127500-01|protein_coding|2/2|c.268A>G|p.Ser90Gly|311/1209|268/1014|90/337||,G|upstream_gene_variant|MODIFIER|EPlOSAG00000027109|EPlOSAG00000027109|transcript|EPlOSAT00000028497|lincRNA||n.-635T>C|||||635|,G|downstream_gene_variant|MODIFIER|OS01G0127450|OS01G0127450|transcript|OS01T0127450-00|protein_coding||c.*888A>G|||||888|
chr01	1513541	G	A	12689	0/0	0/0	0/0	0/0	1|1	0/0	1|1	1|1	0/0	1|1	0/0	0/0	1|1	0/0	0/0	0/0	0/0	0/0	0/0	1|1	0/0	0/0	0/0	0/0	A|missense_variant|MODERATE|OS01G0127500|OS01G0127500|transcript|OS01T0127500-01|protein_coding|2/2|c.275G>A|p.Ser92Asn|318/1209|275/1014|92/337||,A|upstream_gene_variant|MODIFIER|EPlOSAG00000027109|EPlOSAG00000027109|transcript|EPlOSAT00000028497|lincRNA||n.-642C>T|||||642|,A|downstream_gene_variant|MODIFIER|OS01G0127450|OS01G0127450|transcript|OS01T0127450-00|protein_coding||c.*895G>A|||||895|
chr01	1513558	AACG	A	10672	0/0	0/0	0/0	0/0	1/1	0/0	1/1	1/1	0/0	1/1	0/0	0/0	1/1	0/0	0/0	0/0	0/0	0/0	0/0	1/1	0/0	0/0	0/0	0/0	A|disruptive_inframe_deletion|MODERATE|OS01G0127500|OS01G0127500|transcript|OS01T0127500-01|protein_coding|2/2|c.306_308delCGA|p.Asp102del|349/1209|306/1014|102/337||INFO_REALIGN_3_PRIME,A|upstream_gene_variant|MODIFIER|EPlOSAG00000027109|EPlOSAG00000027109|transcript|EPlOSAT00000028497|lincRNA||n.-662_-660delCGT|||||660|,A|downstream_gene_variant|MODIFIER|OS01G0127450|OS01G0127450|transcript|OS0…
chr01	1513892	A	C	16147	0/0	0/0	0/0	0/0	1|1	0/0	1|1	1|1	0/0	1|1	0/0	0/0	1|1	0/0	0/0	0/0	0/0	0/0	0/0	1|1	0/0	0/0	0/0	0/0	C|missense_variant|MODERATE|OS01G0127500|OS01G0127500|transcript|OS01T0127500-01|protein_coding|2/2|c.626A>C|p.Gln209Pro|669/1209|626/1014|209/337||,C|upstream_gene_variant|MODIFIER|EPlOSAG00000027109|EPlOSAG00000027109|transcript|EPlOSAT00000028497|lincRNA||n.-993T>G|||||993|,C|upstream_gene_variant|MODIFIER|OS01G0127600|OS01G0127600|transcript|OS01T0127600-01|protein_coding||c.-1986A>C|||||1945…
chr01	1515891	G	A	14085	0/0	0/0	0/0	0/0	1/1	0/0	1|1	1|1	0/0	1|1	0/0	0/0	1|1	0/0	0/0	0/0	0/0	0/0	0/0	1|1	0/0	0/0	0/0	0/0	A|missense_variant|MODERATE|OS01G0127600|OS01G0127600|transcript|OS01T0127600-01|protein_coding|1/1|c.14G>A|p.Ser5Asn|55/878|14/540|5/179||,A|downstream_gene_variant|MODIFIER|OS01G0127500|OS01G0127500|transcript|OS01T0127500-01|protein_coding||c.*1611G>A|||||1459|
chr01	1515908	C	CTGGGA	14786	0/0	0/0	0/0	0/0	1/1	0/0	1|1	1|1	0/0	1|1	0/0	0/0	1|1	0/0	0/0	0/0	0/0	0/0	0/0	1|1	0/0	0/0	0/0	0/0	CTGGGA|frameshift_variant|HIGH|OS01G0127600|OS01G0127600|transcript|OS01T0127600-01|protein_coding|1/1|c.32_36dupTGGGA|p.Ala13fs|78/878|37/540|13/179||INFO_REALIGN_3_PRIME,CTGGGA|downstream_gene_variant|MODIFIER|OS01G0127500|OS01G0127500|transcript|OS01T0127500-01|protein_coding||c.*1628_*1629insTGGGA|||||1477|
chr01	1515959	C	A	9217.98	0/0	0/0	0/0	0/0	1/1	0/0	1/1	1/1	0/0	1/1	0/0	0/0	1/1	0/0	0/0	0/0	0/0	0/0	0/0	1/1	0/0	0/0	0/0	0/0	A|missense_variant|MODERATE|OS01G0127600|OS01G0127600|transcript|OS01T0127600-01|protein_coding|1/1|c.82C>A|p.Pro28Thr|123/878|82/540|28/179||,A|downstream_gene_variant|MODIFIER|OS01G0127500|OS01G0127500|transcript|OS01T0127500-01|protein_coding||c.*1679C>A|||||1527|
chr01	1515987	A	ACGGCGG	11836	0/0	0/0	0/0	0/0	1/1	0/0	1/1	1/1	0/0	1/1	0/0	0/0	1/1	0/0	0/0	0/0	0/0	0/0	0/0	1/1	0/0	0/0	0/0	0/0	ACGGCGG|disruptive_inframe_insertion|MODERATE|OS01G0127600|OS01G0127600|transcript|OS01T0127600-01|protein_coding|1/1|c.113_118dupGCGGCG|p.Gly38_Gly39dup|160/878|119/540|40/179||INFO_REALIGN_3_PRIME,ACGGCGG|downstream_gene_variant|MODIFIER|OS01G0127500|OS01G0127500|transcript|OS01T0127500-01|protein_coding||c.*1707_*1708insCGGCGG|||||1556|
chr01	1516128	C	T	12908	0/0	0/0	0/0	0/0	1/1	0/0	1/1	1/1	0/0	1/1	0/0	0/0	1/1	0/0	0/0	0/0	0/0	0/0	0/0	1/1	0/0	0/0	0/0	0/0	T|missense_variant|MODERATE|OS01G0127600|OS01G0127600|transcript|OS01T0127600-01|protein_coding|1/1|c.251C>T|p.Ala84Val|292/878|251/540|84/179||,T|downstream_gene_variant|MODIFIER|OS01G0127500|OS01G0127500|transcript|OS01T0127500-01|protein_coding||c.*1848C>T|||||1696|
chr01	1516200	G	GCGA	12470	0/0	0/0	0/0	0/0	1|1	0/0	1|1	1|1	0/0	1|1	0/0	0/0	1|1	0/0	0/0	0/0	0/0	0/0	0/0	1|1	0/0	0/0	0/0	0/0	GCGA|disruptive_inframe_insertion|MODERATE|OS01G0127600|OS01G0127600|transcript|OS01T0127600-01|protein_coding|1/1|c.325_326insACG|p.Gly108_Gly109insAsp|367/878|326/540|109/179||INFO_REALIGN_3_PRIME,GCGA|downstream_gene_variant|MODIFIER|OS01G0127500|OS01G0127500|transcript|OS01T0127500-01|protein_coding||c.*1920_*1921insCGA|||||1769|
chr01	1516206	A	ACGGCGAGGGCGAGGGCCT	15246	0/0	0/0	0/0	0/0	1|1	0/0	1|1	1|1	0/0	1|1	0/0	0/0	1|1	0/0	0/0	0/0	0/0	0/0	0/0	1|1	0/0	0/0	0/0	0/0	ACGGCGAGGGCGAGGGCCT|disruptive_inframe_insertion|MODERATE|OS01G0127600|OS01G0127600|transcript|OS01T0127600-01|protein_coding|1/1|c.329_330insCGGCGAGGGCGAGGGCCT|p.Glu110delinsAspGlyGluGlyGluGlyLeu|371/878|330/540|110/179||,ACGGCGAGGGCGAGGGCCT|downstream_gene_variant|MODIFIER|OS01G0127500|OS01G0127500|transcript|OS01T0127500-01|protein_coding||c.*1926_*1927insCGGCGAGGGCGAGGGCCT|||||1775|
chr01	1516299	A	G	14340	0/0	0/0	0/0	0/0	1/1	0/0	1/1	1/1	0/0	1/1	0/0	0/0	1/1	0/0	0/0	0/0	0/0	0/0	0/0	1/1	0/0	0/0	0/0	0/0	G|missense_variant|MODERATE|OS01G0127600|OS01G0127600|transcript|OS01T0127600-01|protein_coding|1/1|c.422A>G|p.Lys141Arg|463/878|422/540|141/179||,G|upstream_gene_variant|MODIFIER|OS01G0127700|OS01G0127700|transcript|OS01T0127700-01|protein_coding||c.-2080A>G|||||1948|,G|downstream_gene_variant|MODIFIER|OS01G0127500|OS01G0127500|transcript|OS01T0127500-01|protein_coding||c.*2019A>G|||||1867|
chr01	1518406	AGGT	A	4426.88	0/0	0/0	0/0	0/0	1|1	0/0	1/1	1|1	0/0	1|1	0/0	0/0	1|1	0/0	0/0	0/0	0/0	0/0	0/0	1|1	0/0	0/0	0/0	0/0	A|conservative_inframe_deletion|MODERATE|OS01G0127700|OS01G0127700|transcript|OS01T0127700-01|protein_coding|1/2|c.31_33delTGG|p.Trp11del|163/3253|31/456|11/151||INFO_REALIGN_3_PRIME,A|downstream_gene_variant|MODIFIER|OS01G0127600|OS01G0127600|transcript|OS01T0127600-01|protein_coding||c.*1990_*1992delGGT|||||1693|,A|downstream_gene_variant|MODIFIER|EPlOSAG00000027805|EPlOSAG00000027805|transcrip…
chr01	1518424	G	GGCT	4654.91	0/0	0/0	0/0	0/0	1|1	0/0	1|1	1|1	0/0	1|1	0/0	0/0	1|1	0/0	0/0	0/0	0/0	0/0	0/0	1|1	0/0	0/0	0/0	0/0	GGCT|conservative_inframe_insertion|MODERATE|OS01G0127700|OS01G0127700|transcript|OS01T0127700-01|protein_coding|1/2|c.48_49insTGC|p.Gly16_Gly17insCys|181/3253|49/456|17/151||INFO_REALIGN_3_PRIME,GGCT|downstream_gene_variant|MODIFIER|OS01G0127600|OS01G0127600|transcript|OS01T0127600-01|protein_coding||c.*2007_*2008insGCT|||||1711|,GGCT|downstream_gene_variant|MODIFIER|EPlOSAG00000027805|EPlOSAG00…
chr01	1518457	A	G	5770.96	0/0	0/0	0/0	0/0	1|1	0/0	1|1	1|1	0/0	1|1	0/0	0/0	1|1	0/0	0/0	0/0	0/0	0/0	0/0	1|1	0/0	0/0	0/0	0/0	G|missense_variant|MODERATE|OS01G0127700|OS01G0127700|transcript|OS01T0127700-01|protein_coding|1/2|c.79A>G|p.Asn27Asp|211/3253|79/456|27/151||,G|downstream_gene_variant|MODIFIER|OS01G0127600|OS01G0127600|transcript|OS01T0127600-01|protein_coding||c.*2040A>G|||||1743|,G|downstream_gene_variant|MODIFIER|EPlOSAG00000027805|EPlOSAG00000027805|transcript|EPlOSAT00000029193|lincRNA||n.*1838T>C|||||183…
chr01	1518462	CGGT	C	6178.96	0/0	0/0	0/0	0/0	1|1	0/0	1|1	1|1	0/0	1|1	0/0	0/0	1|1	0/0	0/0	0/0	0/0	0/0	0/0	1|1	0/0	0/0	0/0	0/0	C|disruptive_inframe_deletion|MODERATE|OS01G0127700|OS01G0127700|transcript|OS01T0127700-01|protein_coding|1/2|c.87_89delTGG|p.Gly30del|219/3253|87/456|29/151||INFO_REALIGN_3_PRIME,C|downstream_gene_variant|MODIFIER|OS01G0127600|OS01G0127600|transcript|OS01T0127600-01|protein_coding||c.*2046_*2048delGGT|||||1749|,C|downstream_gene_variant|MODIFIER|EPlOSAG00000027805|EPlOSAG00000027805|transcript|…
chr01	1518474	CGGCGGCGGCGGG	C	5964.96	0/0	0/0	0/0	0/0	1|1	0/0	1|1	1|1	0/0	1|1	0/0	0/0	1|1	0/0	0/0	0/0	0/0	0/0	0/0	1|1	0/0	0/0	0/0	0/0	C|disruptive_inframe_deletion|MODERATE|OS01G0127700|OS01G0127700|transcript|OS01T0127700-01|protein_coding|1/2|c.98_109delGCGGCGGCGGGG|p.Gly33_Gly36del|230/3253|98/456|33/151||INFO_REALIGN_3_PRIME,C|downstream_gene_variant|MODIFIER|OS01G0127600|OS01G0127600|transcript|OS01T0127600-01|protein_coding||c.*2058_*2069delGGCGGCGGCGGG|||||1761|,C|downstream_gene_variant|MODIFIER|EPlOSAG00000027805|EPlOS…
chr01	1518557	G	A	8854.98	0/0	0/0	0/0	0/0	1/1	0/0	1/1	1/1	0/0	1/1	0/0	0/0	1/1	0/0	0/0	0/0	0/0	0/0	0/0	1/1	0/0	0/0	0/0	0/0	A|missense_variant|MODERATE|OS01G0127700|OS01G0127700|transcript|OS01T0127700-01|protein_coding|1/2|c.179G>A|p.Arg60His|311/3253|179/456|60/151||,A|downstream_gene_variant|MODIFIER|OS01G0127600|OS01G0127600|transcript|OS01T0127600-01|protein_coding||c.*2140G>A|||||1843|,A|downstream_gene_variant|MODIFIER|EPlOSAG00000027805|EPlOSAG00000027805|transcript|EPlOSAT00000029193|lincRNA||n.*1738C>T|||||1…
chr01	1518614	C	CGAG	7099.26	0/0	0/0	0/0	0/0	1|1	0/0	1|1	1|1	0/0	1|1	0/0	0/0	1|1	0/0	0/0	0/0	0/0	0/0	0/0	1|1	0/0	0/0	0/0	0/0	CGAG|disruptive_inframe_insertion|MODERATE|OS01G0127700|OS01G0127700|transcript|OS01T0127700-01|protein_coding|1/2|c.236_237insGAG|p.Ala79_Cys80insSer|369/3253|237/456|79/151||,CGAG|downstream_gene_variant|MODIFIER|OS01G0127600|OS01G0127600|transcript|OS01T0127600-01|protein_coding||c.*2197_*2198insGAG|||||1901|,CGAG|downstream_gene_variant|MODIFIER|EPlOSAG00000027805|EPlOSAG00000027805|transcrip…
chr01	1518616	T	C	7279.22	0/0	0/0	0/0	0/0	1|1	0/0	1|1	1|1	0/0	1|1	0/0	0/0	1|1	0/0	0/0	0/0	0/0	0/0	0/0	1|1	0/0	0/0	0/0	0/0	C|missense_variant|MODERATE|OS01G0127700|OS01G0127700|transcript|OS01T0127700-01|protein_coding|1/2|c.238T>C|p.Cys80Arg|370/3253|238/456|80/151||,C|downstream_gene_variant|MODIFIER|OS01G0127600|OS01G0127600|transcript|OS01T0127600-01|protein_coding||c.*2199T>C|||||1902|,C|downstream_gene_variant|MODIFIER|EPlOSAG00000027805|EPlOSAG00000027805|transcript|EPlOSAT00000029193|lincRNA||n.*1679A>G|||||1…
chr01	1518623	TA	T	7715.22	0/0	0/0	0/0	0/0	1|1	0/0	1|1	1|1	0/0	1|1	0/0	0/0	1|1	0/0	0/0	0/0	0/0	0/0	0/0	1|1	0/0	0/0	0/0	0/0	T|frameshift_variant|HIGH|OS01G0127700|OS01G0127700|transcript|OS01T0127700-01|protein_coding|1/2|c.246delA|p.Leu82fs|378/3253|246/456|82/151||,T|downstream_gene_variant|MODIFIER|OS01G0127600|OS01G0127600|transcript|OS01T0127600-01|protein_coding||c.*2207delA|||||1910|,T|downstream_gene_variant|MODIFIER|EPlOSAG00000027805|EPlOSAG00000027805|transcript|EPlOSAT00000029193|lincRNA||n.*1671delT|||||1…
chr01	1518625	C	G	7670.22	0/0	0/0	0/0	0/0	1|1	0/0	1|1	1|1	0/0	1|1	0/0	0/0	1|1	0/0	0/0	0/0	0/0	0/0	0/0	1|1	0/0	0/0	0/0	0/0	G|missense_variant|MODERATE|OS01G0127700|OS01G0127700|transcript|OS01T0127700-01|protein_coding|1/2|c.247C>G|p.Leu83Val|379/3253|247/456|83/151||,G|downstream_gene_variant|MODIFIER|OS01G0127600|OS01G0127600|transcript|OS01T0127600-01|protein_coding||c.*2208C>G|||||1911|,G|downstream_gene_variant|MODIFIER|EPlOSAG00000027805|EPlOSAG00000027805|transcript|EPlOSAT00000029193|lincRNA||n.*1670G>C|||||1…
chr01	1518627	GCCA	G	8075.22	0/0	0/0	0/0	0/0	1|1	0/0	1|1	1|1	0/0	1|1	0/0	0/0	1|1	0/0	0/0	0/0	0/0	0/0	0/0	1|1	0/0	0/0	0/0	0/0	G|conservative_inframe_deletion|MODERATE|OS01G0127700|OS01G0127700|transcript|OS01T0127700-01|protein_coding|1/2|c.250_252delCCA|p.Pro84del|382/3253|250/456|84/151||,G|downstream_gene_variant|MODIFIER|OS01G0127600|OS01G0127600|transcript|OS01T0127600-01|protein_coding||c.*2211_*2213delCCA|||||1914|,G|downstream_gene_variant|MODIFIER|EPlOSAG00000027805|EPlOSAG00000027805|transcript|EPlOSAT00000029…
chr01	1518632	C	T	7985.22	0/0	0/0	0/0	0/0	1|1	0/0	1|1	1|1	0/0	1|1	0/0	0/0	1|1	0/0	0/0	0/0	0/0	0/0	0/0	1|1	0/0	0/0	0/0	0/0	T|missense_variant|MODERATE|OS01G0127700|OS01G0127700|transcript|OS01T0127700-01|protein_coding|1/2|c.254C>T|p.Ser85Phe|386/3253|254/456|85/151||,T|downstream_gene_variant|MODIFIER|OS01G0127600|OS01G0127600|transcript|OS01T0127600-01|protein_coding||c.*2215C>T|||||1918|,T|downstream_gene_variant|MODIFIER|EPlOSAG00000027805|EPlOSAG00000027805|transcript|EPlOSAT00000029193|lincRNA||n.*1663G>A|||||1…
chr01	1518634	CATCG	C	8075.22	0/0	0/0	0/0	0/0	1|1	0/0	1|1	1|1	0/0	1|1	0/0	0/0	1|1	0/0	0/0	0/0	0/0	0/0	0/0	1|1	0/0	0/0	0/0	0/0	C|frameshift_variant|HIGH|OS01G0127700|OS01G0127700|transcript|OS01T0127700-01|protein_coding|1/2|c.257_260delATCG|p.His86fs|389/3253|257/456|86/151||,C|downstream_gene_variant|MODIFIER|OS01G0127600|OS01G0127600|transcript|OS01T0127600-01|protein_coding||c.*2218_*2221delATCG|||||1921|,C|downstream_gene_variant|MODIFIER|EPlOSAG00000027805|EPlOSAG00000027805|transcript|EPlOSAT00000029193|lincRNA||n…
chr01	1518639	T	TA	7984.12	0/0	0/0	0/0	0/0	1|1	0/0	1|1	1|1	0/0	1|1	0/0	0/0	1|1	0/0	0/0	0/0	0/0	0/0	0/0	1|1	0/0	0/0	0/0	0/0	TA|frameshift_variant|HIGH|OS01G0127700|OS01G0127700|transcript|OS01T0127700-01|protein_coding|1/2|c.261_262insA|p.Pro88fs|394/3253|262/456|88/151||,TA|downstream_gene_variant|MODIFIER|OS01G0127600|OS01G0127600|transcript|OS01T0127600-01|protein_coding||c.*2222_*2223insA|||||1926|,TA|downstream_gene_variant|MODIFIER|EPlOSAG00000027805|EPlOSAG00000027805|transcript|EPlOSAT00000029193|lincRNA||n.*1…
chr01	1518643	C	CT	8032.12	0/0	0/0	0/0	0/0	1|1	0/0	1|1	1|1	0/0	1|1	0/0	0/0	1|1	0/0	0/0	0/0	0/0	0/0	0/0	1|1	0/0	0/0	0/0	0/0	CT|frameshift_variant|HIGH|OS01G0127700|OS01G0127700|transcript|OS01T0127700-01|protein_coding|1/2|c.268dupT|p.Ser90fs|401/3253|269/456|90/151||INFO_REALIGN_3_PRIME,CT|downstream_gene_variant|MODIFIER|OS01G0127600|OS01G0127600|transcript|OS01T0127600-01|protein_coding||c.*2226_*2227insT|||||1930|,CT|downstream_gene_variant|MODIFIER|EPlOSAG00000027805|EPlOSAG00000027805|transcript|EPlOSAT000000291…
chr01	1518664	G	GCTGCTA	9772.12	0/0	0/0	0/0	0/0	1/1	0/0	1/1	1/1	0/0	1/1	0/0	0/0	1/1	0/0	0/0	0/0	0/0	0/0	0/0	1/1	0/0	0/0	0/0	0/0	GCTGCTA|disruptive_inframe_insertion|MODERATE|OS01G0127700|OS01G0127700|transcript|OS01T0127700-01|protein_coding|1/2|c.287_292dupCTGCTA|p.Ala97_Arg98insThrAla|425/3253|293/456|98/151||INFO_REALIGN_3_PRIME,GCTGCTA|downstream_gene_variant|MODIFIER|OS01G0127600|OS01G0127600|transcript|OS01T0127600-01|protein_coding||c.*2247_*2248insCTGCTA|||||1951|,GCTGCTA|downstream_gene_variant|MODIFIER|EPlOSAG00…
chr01	1518701	A	G	9530.44	0/0	0/0	0/0	0/0	1|1	0/0	1/1	1|1	0/0	1|1	0/0	0/0	1|1	0/0	0/0	0/0	0/0	0/0	0/0	./.	0/0	0/0	0/0	0/0	G|missense_variant|MODERATE|OS01G0127700|OS01G0127700|transcript|OS01T0127700-01|protein_coding|1/2|c.323A>G|p.His108Arg|455/3253|323/456|108/151||,G|downstream_gene_variant|MODIFIER|OS01G0127600|OS01G0127600|transcript|OS01T0127600-01|protein_coding||c.*2284A>G|||||1987|,G|downstream_gene_variant|MODIFIER|EPlOSAG00000027805|EPlOSAG00000027805|transcript|EPlOSAT00000029193|lincRNA||n.*1594T>C||||…
chr01	1518724	T	TC	9156.48	0/0	0/0	0/0	0/0	1|1	0/0	1|1	1|1	0/0	1|1	0/0	0/0	1|1	0/0	0/0	0/0	0/0	0/0	0/0	./.	0/0	0/0	0/0	0/0	TC|frameshift_variant|HIGH|OS01G0127700|OS01G0127700|transcript|OS01T0127700-01|protein_coding|1/2|c.346_347insC|p.Phe116fs|479/3253|347/456|116/151||,TC|downstream_gene_variant|MODIFIER|EPlOSAG00000027805|EPlOSAG00000027805|transcript|EPlOSAT00000029193|lincRNA||n.*1570_*1571insG|||||1570|
chr01	1518725	T	TTTAA	9116.48	0/0	0/0	0/0	0/0	1|1	0/0	1|1	1|1	0/0	1|1	0/0	0/0	1|1	0/0	0/0	0/0	0/0	0/0	0/0	./.	0/0	0/0	0/0	0/0	TTTAA|frameshift_variant&stop_gained|HIGH|OS01G0127700|OS01G0127700|transcript|OS01T0127700-01|protein_coding|1/2|c.349_350insAATT|p.Leu117fs|482/3253|350/456|117/151||INFO_REALIGN_3_PRIME,TTTAA|downstream_gene_variant|MODIFIER|EPlOSAG00000027805|EPlOSAG00000027805|transcript|EPlOSAT00000029193|lincRNA||n.*1569_*1570insTTAA|||||1569|
chr01	1518732	G	T	7755.44	0/0	0/0	0/0	0/0	1|1	0/0	1|1	1|1	0/0	1|1	0/0	0/0	1|1	0/0	0/0	0/0	0/0	0/0	0/0	./.	0/0	0/0	0/0	0/0	T|missense_variant|MODERATE|OS01G0127700|OS01G0127700|transcript|OS01T0127700-01|protein_coding|1/2|c.354G>T|p.Leu118Phe|486/3253|354/456|118/151||,T|downstream_gene_variant|MODIFIER|EPlOSAG00000027805|EPlOSAG00000027805|transcript|EPlOSAT00000029193|lincRNA||n.*1563C>A|||||1563|
chr01	1518746	G	A	8650.44	0/0	0/0	0/0	0/0	1|1	0/0	1/1	1|1	0/0	1|1	0/0	0/0	1|1	0/0	0/0	0/0	0/0	0/0	0/0	./.	0/0	0/0	0/0	0/0	A|missense_variant|MODERATE|OS01G0127700|OS01G0127700|transcript|OS01T0127700-01|protein_coding|1/2|c.368G>A|p.Ser123Asn|500/3253|368/456|123/151||,A|downstream_gene_variant|MODIFIER|EPlOSAG00000027805|EPlOSAG00000027805|transcript|EPlOSAT00000029193|lincRNA||n.*1549C>T|||||1549|
chr01	1518757	C	A	8792.44	0/0	0/0	0/0	0/0	1|1	0/0	1|1	1|1	0/0	1|1	0/0	0/0	1|1	0/0	0/0	0/0	0/0	0/0	0/0	./.	0/0	0/0	0/0	0/0	A|missense_variant|MODERATE|OS01G0127700|OS01G0127700|transcript|OS01T0127700-01|protein_coding|1/2|c.379C>A|p.Leu127Ile|511/3253|379/456|127/151||,A|downstream_gene_variant|MODIFIER|EPlOSAG00000027805|EPlOSAG00000027805|transcript|EPlOSAT00000029193|lincRNA||n.*1538G>T|||||1538|
chr01	1518764	T	C	8380.44	0/0	0/0	0/0	0/0	1|1	0/0	1|1	1|1	0/0	1|1	0/0	0/0	1|1	0/0	0/0	0/0	0/0	0/0	0/0	./.	0/0	0/0	0/0	0/0	C|missense_variant|MODERATE|OS01G0127700|OS01G0127700|transcript|OS01T0127700-01|protein_coding|1/2|c.386T>C|p.Ile129Thr|518/3253|386/456|129/151||,C|downstream_gene_variant|MODIFIER|EPlOSAG00000027805|EPlOSAG00000027805|transcript|EPlOSAT00000029193|lincRNA||n.*1531A>G|||||1531|
chr01	1518767	T	C	8029.44	0/0	0/0	0/0	0/0	1|1	0/0	1|1	1|1	0/0	1|1	0/0	0/0	1|1	0/0	0/0	0/0	0/0	0/0	0/0	./.	0/0	0/0	0/0	0/0	C|missense_variant|MODERATE|OS01G0127700|OS01G0127700|transcript|OS01T0127700-01|protein_coding|1/2|c.389T>C|p.Leu130Pro|521/3253|389/456|130/151||,C|downstream_gene_variant|MODIFIER|EPlOSAG00000027805|EPlOSAG00000027805|transcript|EPlOSAT00000029193|lincRNA||n.*1528A>G|||||1528|
chr01	1518773	TG	T	7877.64	0/0	0/0	0/0	0/0	1|1	0/0	1|1	1|1	0/0	1|1	0/0	0/0	1|1	0/0	0/0	0/0	0/0	0/0	0/0	0/0	0/0	0/0	0/0	0/0	T|frameshift_variant|HIGH|OS01G0127700|OS01G0127700|transcript|OS01T0127700-01|protein_coding|1/2|c.396delG|p.Leu132fs|528/3253|396/456|132/151||,T|downstream_gene_variant|MODIFIER|EPlOSAG00000027805|EPlOSAG00000027805|transcript|EPlOSAT00000029193|lincRNA||n.*1521delC|||||1521|
chr01	1518826	TATGGGTA	T	10110	0/0	0/0	0/0	0/0	1|1	0/0	1|1	1|1	0/0	1|1	0/0	0/0	1|1	0/0	0/0	0/0	0/0	0/0	0/0	1|1	0/0	0/0	0/0	0/0	T|frameshift_variant&stop_lost|HIGH|OS01G0127700|OS01G0127700|transcript|OS01T0127700-01|protein_coding|1/2|c.455_*5delAATGGGT|p.Ter152fs|587/3253|455/456|152/151||INFO_REALIGN_3_PRIME,T|3_prime_UTR_variant|MODIFIER|OS01G0127700|OS01G0127700|transcript|OS01T0127700-01|protein_coding|1/2|c.455_*5delAATGGGT||||||INFO_REALIGN_3_PRIME,T|downstream_gene_variant|MODIFIER|EPlOSAG00000027805|EPlOSAG00000…
chr01	1564344	C	T	5331.79	0/0	1/1	0/0	0/0	0/0	1/1	0/0	0/0	0/0	0/0	0/0	0/0	0/0	0/0	0/0	0/0	0/0	0/0	0/0	0/0	0/0	0/0	0/0	0/0	T|missense_variant|MODERATE|OS01G0128100|OS01G0128100|transcript|OS01T0128100-01|protein_coding|1/9|c.79G>A|p.Ala27Thr|2211/3169|79/876|27/291||,T|upstream_gene_variant|MODIFIER|OS01G0128200|OS01G0128200|transcript|OS01T0128200-01|protein_coding||c.-1822C>T|||||1803|
chr01	1570052	C	T	7702.73	0/0	0/0	0/0	0/0	0/0	0/0	1/1	0/0	0/0	1/1	0/0	0/0	0/0	0/0	0/0	0/0	0/0	0/0	0/0	1/1	0/0	0/0	0/0	0/0	T|missense_variant|MODERATE|MHZ4|OS01G0128300|transcript|OS01T0128300-00|protein_coding|5/6|c.490G>A|p.Glu164Lys|542/837|490/687|164/228||,T|upstream_gene_variant|MODIFIER|OS01G0128250|OS01G0128250|transcript|OS01T0128250-01|protein_coding||c.-1719G>A|||||1063|,T|downstream_gene_variant|MODIFIER|OS01G0128200|OS01G0128200|transcript|OS01T0128200-01|protein_coding||c.*929C>T|||||585|,T|downstream_g…
chr01	1712689	G	GCGC	7751.01	0/0	0/0	0/0	0/0	1/1	0/0	1/1	1/1	0/0	1/1	0/0	0/0	1/1	0/0	0/0	0/0	0/0	0/0	0/0	1/1	0/0	0/0	0/0	0/0	GCGC|conservative_inframe_insertion|MODERATE|OS01G0130900|OS01G0130900|transcript|OS01T0130900-01|protein_coding|1/1|c.160_162dupGCG|p.Ala54dup|258/811|162/525|54/174||
chr01	2072326	G	T	16964.9	0/0	0/0	1/1	0/0	0/0	1/1	1/1	1/1	0/0	1/1	0/0	1/1	1/1	0/0	0/0	0/0	0/0	0/0	0/0	1/1	0/0	0/0	0/0	0/0	T|missense_variant|MODERATE|OS01G0138800|OS01G0138800|transcript|OS01T0138800-01|protein_coding|2/3|c.253G>T|p.Gly85Cys|380/1564|253/1296|85/431||
chr01	2072665	G	T	19214	0/0	0/0	1|1	0/0	0/0	1|1	1|1	1|1	0/0	1|1	0/0	1|1	1|1	0/0	0/0	0/0	0/0	0/0	0/0	1|1	0/0	0/0	0/0	0/0	T|stop_gained|HIGH|OS01G0138800|OS01G0138800|transcript|OS01T0138800-01|protein_coding|2/3|c.592G>T|p.Glu198*|719/1564|592/1296|198/431||
chr01	2072666	A	T	19214	0/0	0/0	1|1	0/0	0/0	1|1	1|1	1|1	0/0	1|1	0/0	1|1	1|1	0/0	0/0	0/0	0/0	0/0	0/0	1|1	0/0	0/0	0/0	0/0	T|missense_variant|MODERATE|OS01G0138800|OS01G0138800|transcript|OS01T0138800-01|protein_coding|2/3|c.593A>T|p.Glu198Val|720/1564|593/1296|198/431||
chr01	2072937	GGCC	G	16293.9	0/0	0/0	1/1	0/0	0/0	1/1	1/1	1/1	0/0	1/1	0/0	1/1	1/1	0/0	0/0	0/0	0/0	0/0	0/0	1/1	0/0	0/0	0/0	0/0	G|conservative_inframe_deletion|MODERATE|OS01G0138800|OS01G0138800|transcript|OS01T0138800-01|protein_coding|2/3|c.880_882delGCC|p.Ala294del|1007/1564|880/1296|294/431||INFO_REALIGN_3_PRIME,G|downstream_gene_variant|MODIFIER|OS01G0138900|OS01G0138900|transcript|OS01T0138900-01|protein_coding||c.*2155_*2157delGGC|||||1857|
chr01	2075877	C	T	20269.9	0/0	0/0	1|1	0/0	0/0	1|1	1|1	1|1	0/0	1|1	0/0	1|1	1|1	0/0	0/0	0/0	0/0	0/0	0/0	1|1	0/0	0/0	0/0	0/0	T|missense_variant|MODERATE|OS01G0138900|OS01G0138900|transcript|OS01T0138900-01|protein_coding|4/7|c.1112G>A|p.Arg371His|1175/1704|1112/1341|371/446||
chr01	2075969	C	T	14855.9	0/0	0/0	1/1	0/0	0/0	1/1	1/1	1/1	0/0	1/1	0/0	1/1	1/1	0/0	0/0	0/0	0/0	0/0	0/0	1/1	0/0	0/0	0/0	0/0	T|missense_variant|MODERATE|OS01G0138900|OS01G0138900|transcript|OS01T0138900-01|protein_coding|4/7|c.1020G>A|p.Met340Ile|1083/1704|1020/1341|340/446||
chr01	2076354	G	A	15626.9	0/0	0/0	1/1	0/0	0/0	1/1	1/1	1/1	0/0	1/1	0/0	1/1	1/1	0/0	0/0	0/0	0/0	0/0	0/0	1/1	0/0	0/0	0/0	0/0	A|missense_variant|MODERATE|OS01G0138900|OS01G0138900|transcript|OS01T0138900-01|protein_coding|3/7|c.782C>T|p.Ala261Val|845/1704|782/1341|261/446||
chr01	2154332	C	A	18030.9	0/0	0/0	1/1	0/0	0/0	1/1	1/1	1/1	0/0	1/1	0/0	1/1	1/1	0/0	0/0	0/0	0/0	0/0	0/0	1/1	0/0	0/0	0/0	0/0	A|missense_variant|MODERATE|OS01G0140700|OS01G0140700|transcript|OS01T0140700-00|protein_coding|1/1|c.7C>A|p.Gln3Lys|7/954|7/954|3/317||
chr01	2154406	A	AGAG	15692	0/0	0/0	1/1	0/0	0/0	1/1	1/1	1/1	0/0	1/1	0/0	1/1	1/1	0/0	0/0	0/0	0/0	0/0	0/0	1/1	0/0	0/0	0/0	0/0	AGAG|conservative_inframe_insertion|MODERATE|OS01G0140700|OS01G0140700|transcript|OS01T0140700-00|protein_coding|1/1|c.100_102dupGAG|p.Glu34dup|103/954|103/954|35/317||INFO_REALIGN_3_PRIME
chr01	2155239	A	T	19788.9	0/0	0/0	1/1	0/0	0/0	1/1	1/1	1/1	0/0	1/1	0/0	1/1	1/1	0/0	0/0	0/0	0/0	0/0	0/0	1/1	0/0	0/0	0/0	0/0	T|missense_variant|MODERATE|OS01G0140700|OS01G0140700|transcript|OS01T0140700-00|protein_coding|1/1|c.914A>T|p.Lys305Met|914/954|914/954|305/317||
chr01	2216420	T	C	15035.9	0/0	0/0	1/1	0/0	0/0	1/1	1/1	1/1	0/0	1/1	0/0	1/1	1/1	0/0	0/0	0/0	0/0	0/0	0/0	1/1	0/0	0/0	0/0	0/0	C|missense_variant|MODERATE|OS01G0141100|OS01G0141100|transcript|OS01T0141100-02|protein_coding|6/8|c.581A>G|p.Asn194Ser|582/1160|581/912|194/303||WARNING_TRANSCRIPT_NO_START_CODON,C|5_prime_UTR_variant|MODIFIER|OS01G0141150|OS01G0141150|transcript|OS01T0141150-00|protein_coding|2/7|c.-490T>C|||||4833|WARNING_TRANSCRIPT_INCOMPLETE,C|3_prime_UTR_variant|MODIFIER|OS01G0141100|OS01G0141100|transcrip…
chr01	2227328	A	T	16549.9	0/0	0/0	1/1	0/0	0/0	1/1	1/1	1/1	0/0	1/1	0/0	1/1	1/1	0/0	0/0	0/0	0/0	0/0	0/0	1/1	0/0	0/0	0/0	0/0	T|missense_variant|MODERATE|OS01G0141300|OS01G0141300|transcript|OS01T0141300-00|protein_coding|6/8|c.905T>A|p.Val302Glu|905/1437|905/1437|302/478||,T|5_prime_UTR_variant|MODIFIER|OS01G0141450|OS01G0141450|transcript|OS01T0141450-00|protein_coding|2/6|c.-584A>T|||||1822|,T|upstream_gene_variant|MODIFIER|EPlOSAG00000033790|EPlOSAG00000033790|transcript|EPlOSAT00000035178|lincRNA||n.-1496A>T|||||14…
chr01	2229273	TCGCCGCCGCCGC	T	16425.9	0/0	0/0	1/1	0/0	0/0	1/1	1/1	1/1	0/0	1/1	0/0	1/1	1/1	0/0	0/0	0/0	0/0	0/0	0/0	1/1	0/0	0/0	0/0	0/0	T|conservative_inframe_deletion|MODERATE|OS01G0141450|OS01G0141450|transcript|OS01T0141450-00|protein_coding|6/6|c.136_147delCCGCCGCCGCCG|p.Pro46_Pro49del|923/1099|136/285|46/94||INFO_REALIGN_3_PRIME,T|disruptive_inframe_deletion|MODERATE|OS01G0141300|OS01G0141300|transcript|OS01T0141300-00|protein_coding|1/8|c.242_253delGCGGCGGCGGCG|p.Gly81_Gly84del|253/1437|242/1437|81/478||,T|upstream_gene_var…
chr01	2245813	A	C	16637.9	0/0	0/0	1/1	0/0	0/0	1/1	1/1	1/1	0/0	1/1	0/0	1/1	1/1	0/0	0/0	0/0	0/0	0/0	0/0	1/1	0/0	0/0	0/0	0/0	C|missense_variant|MODERATE|OS01G0141600|OS01G0141600|transcript|OS01T0141600-01|protein_coding|1/15|c.37A>C|p.Ser13Arg|82/1631|37/972|13/323||
chr01	2254943	CGCGGCGGCG	C	8914.94	0/0	0/0	1/1	0/0	0/0	1/1	1/1	1/1	0/0	1/1	0/0	1/1	1/1	0/0	0/0	0/0	0/0	0/0	0/0	1/1	0/0	0/0	0/0	0/0	C|conservative_inframe_deletion|MODERATE|OS01G0141700|OS01G0141700|transcript|OS01T0141700-01|protein_coding|1/11|c.49_57delCGCCGCCGC|p.Arg17_Arg19del|130/2091|49/1752|17/583||
chr01	2261751	TGCG	T	382.6	0/0	0/0	./.	0/0	0/0	0/0	0/0	1|1	0/0	0/0	0/0	./.	./.	0/0	0/0	0/0	0/0	0/0	0/0	1|1	0/0	0/0	0/0	0/0	T|disruptive_inframe_deletion|MODERATE|OS01G0141900|OS01G0141900|transcript|OS01T0141900-01|protein_coding|1/5|c.32_34delCGG|p.Ala11del|262/2556|32/1821|11/606||INFO_REALIGN_3_PRIME,T|downstream_gene_variant|MODIFIER|EPlOSAG00000023148|EPlOSAG00000023148|transcript|EPlOSAT00000024536|lincRNA||n.*1997_*1999delGCG|||||1997|
chr01	2261771	GC	G	863.76	0/0	0/0	./.	0/0	0/0	./.	./.	1|1	0/0	./.	0/0	./.	./.	0/0	0/0	0/0	0/0	0/0	0/0	1|1	0/0	0/0	0/0	0/0	G|frameshift_variant|HIGH|OS01G0141900|OS01G0141900|transcript|OS01T0141900-01|protein_coding|1/5|c.42delC|p.Gly15fs|272/2556|42/1821|14/606||
chr01	2261773	GGC	G	942.51	0/0	0/0	0/0	0/0	0/0	0/0	./.	1|1	0/0	0/0	0/0	0/0	./.	0/0	0/0	0/0	0/0	0/0	0/0	1|1	0/0	0/0	0/0	0/0	G|frameshift_variant|HIGH|OS01G0141900|OS01G0141900|transcript|OS01T0141900-01|protein_coding|1/5|c.45_46delCG|p.Asp16fs|275/2556|45/1821|15/606||INFO_REALIGN_3_PRIME
chr01	2261961	A	ACCG	14187	0/0	0/0	1|1	0/0	0/0	1|1	1|1	1|1	0/0	1|1	0/0	1|1	1|1	0/0	0/0	0/0	0/0	0/0	0/0	1|1	0/0	0/0	0/0	0/0	ACCG|disruptive_inframe_insertion|MODERATE|OS01G0141900|OS01G0141900|transcript|OS01T0141900-01|protein_coding|1/5|c.239_241dupCGC|p.Pro80dup|472/2556|242/1821|81/606||INFO_REALIGN_3_PRIME
chr01	2263808	T	C	14626.9	0/0	0/0	1/1	0/0	0/0	1/1	1/1	1/1	0/0	1/1	0/0	1/1	1/1	0/0	0/0	0/0	0/0	0/0	0/0	1/1	0/0	0/0	0/0	0/0	C|missense_variant|MODERATE|OS01G0141900|OS01G0141900|transcript|OS01T0141900-01|protein_coding|3/5|c.428T>C|p.Val143Ala|658/2556|428/1821|143/606||
chr01	2264617	A	G	19041.9	0/0	0/0	1|1	0/0	0/0	1|1	1|1	1|1	0/0	1|1	0/0	1|1	1|1	0/0	0/0	0/0	0/0	0/0	0/0	1|1	0/0	0/0	0/0	0/0	G|missense_variant|MODERATE|OS01G0141900|OS01G0141900|transcript|OS01T0141900-01|protein_coding|4/5|c.799A>G|p.Thr267Ala|1029/2556|799/1821|267/606||,G|downstream_gene_variant|MODIFIER|EGY2|OS01G0142100|transcript|OS01T0142100-01|protein_coding||c.*2033T>C|||||1664|,G|downstream_gene_variant|MODIFIER|EGY2|OS01G0142100|transcript|OS01T0142100-02|protein_coding||c.*2033T>C|||||1736|WARNING_TRANSCRI…
chr01	2264783	G	A	16558	0/0	0/0	1/1	0/0	0/0	1/1	1/1	1/1	0/0	1/1	0/0	1/1	1/1	0/0	0/0	0/0	0/0	0/0	0/0	1/1	0/0	0/0	0/0	0/0	A|missense_variant|MODERATE|OS01G0141900|OS01G0141900|transcript|OS01T0141900-01|protein_coding|4/5|c.965G>A|p.Arg322Gln|1195/2556|965/1821|322/606||,A|downstream_gene_variant|MODIFIER|EGY2|OS01G0142100|transcript|OS01T0142100-01|protein_coding||c.*1867C>T|||||1498|,A|downstream_gene_variant|MODIFIER|EGY2|OS01G0142100|transcript|OS01T0142100-02|protein_coding||c.*1867C>T|||||1570|WARNING_TRANSCRI…
chr01	2264836	A	T	17972.9	0/0	0/0	1|1	0/0	0/0	1|1	1|1	1|1	0/0	1|1	0/0	1|1	1|1	0/0	0/0	0/0	0/0	0/0	0/0	1|1	0/0	0/0	0/0	0/0	T|missense_variant|MODERATE|OS01G0141900|OS01G0141900|transcript|OS01T0141900-01|protein_coding|4/5|c.1018A>T|p.Thr340Ser|1248/2556|1018/1821|340/606||,T|downstream_gene_variant|MODIFIER|EGY2|OS01G0142100|transcript|OS01T0142100-01|protein_coding||c.*1814T>A|||||1445|,T|downstream_gene_variant|MODIFIER|EGY2|OS01G0142100|transcript|OS01T0142100-02|protein_coding||c.*1814T>A|||||1517|WARNING_TRANSC…
chr01	2264852	C	T	19100.9	0/0	0/0	1|1	0/0	0/0	1|1	1|1	1|1	0/0	1|1	0/0	1|1	1|1	0/0	0/0	0/0	0/0	0/0	0/0	1|1	0/0	0/0	0/0	0/0	T|missense_variant|MODERATE|OS01G0141900|OS01G0141900|transcript|OS01T0141900-01|protein_coding|4/5|c.1034C>T|p.Pro345Leu|1264/2556|1034/1821|345/606||,T|downstream_gene_variant|MODIFIER|EGY2|OS01G0142100|transcript|OS01T0142100-01|protein_coding||c.*1798G>A|||||1429|,T|downstream_gene_variant|MODIFIER|EGY2|OS01G0142100|transcript|OS01T0142100-02|protein_coding||c.*1798G>A|||||1501|WARNING_TRANSC…
chr01	2264854	G	A	18984.9	0/0	0/0	1|1	0/0	0/0	1|1	1|1	1|1	0/0	1|1	0/0	1|1	1|1	0/0	0/0	0/0	0/0	0/0	0/0	1|1	0/0	0/0	0/0	0/0	A|missense_variant|MODERATE|OS01G0141900|OS01G0141900|transcript|OS01T0141900-01|protein_coding|4/5|c.1036G>A|p.Ala346Thr|1266/2556|1036/1821|346/606||,A|downstream_gene_variant|MODIFIER|EGY2|OS01G0142100|transcript|OS01T0142100-01|protein_coding||c.*1796C>T|||||1427|,A|downstream_gene_variant|MODIFIER|EGY2|OS01G0142100|transcript|OS01T0142100-02|protein_coding||c.*1796C>T|||||1499|WARNING_TRANSC…
chr01	2362055	G	A	18489.9	0/0	0/0	1/1	0/0	0/0	1/1	1/1	1/1	0/0	1/1	0/0	1/1	1/1	0/0	0/0	0/0	0/0	0/0	0/0	1/1	0/0	0/0	0/0	0/0	A|missense_variant|MODERATE|OS01G0143400|OS01G0143400|transcript|OS01T0143400-00|protein_coding|1/1|c.1760C>T|p.Ala587Val|1760/2016|1760/2016|587/671||,A|upstream_gene_variant|MODIFIER|OS01G0143300|OS01G0143300|transcript|OS01T0143300-01|protein_coding||c.-1684C>T|||||1618|,A|downstream_gene_variant|MODIFIER|OS01G0143350|OS01G0143350|transcript|OS01T0143350-00|protein_coding||c.*1662G>A|||||1662|…
chr01	2363495	A	T	17443	0/0	0/0	1/1	0/0	0/0	1/1	./.	./.	0/0	./.	0/0	1/1	./.	0/0	0/0	0/0	0/0	0/0	0/0	1/1	0/0	0/0	0/0	0/0	T|missense_variant|MODERATE|OS01G0143400|OS01G0143400|transcript|OS01T0143400-00|protein_coding|1/1|c.320T>A|p.Leu107Gln|320/2016|320/2016|107/671||
chr01	2363715	G	A	16500.9	0/0	0/0	1/1	0/0	0/0	1/1	1/1	1/1	0/0	1/1	0/0	1/1	1/1	0/0	0/0	0/0	0/0	0/0	0/0	1/1	0/0	0/0	0/0	0/0	A|stop_gained|HIGH|OS01G0143400|OS01G0143400|transcript|OS01T0143400-00|protein_coding|1/1|c.100C>T|p.Gln34*|100/2016|100/2016|34/671||
chr01	2373999	G	A	17319.6	0/0	0/0	1/1	0/0	0/0	1/1	1/1	1/1	0/0	1/1	0/0	1/1	1/1	1/1	0/0	0/0	0/0	0/0	0/0	1/1	0/0	0/0	0/0	0/0	A|missense_variant|MODERATE|OS01G0143700|OS01G0143700|transcript|OS01T0143700-00|protein_coding|1/3|c.68C>T|p.Ala23Val|68/780|68/780|23/259||,A|3_prime_UTR_variant|MODIFIER|OS01G0143750|OS01G0143750|transcript|OS01T0143750-00|protein_coding|3/3|c.*344G>A|||||1238|,A|upstream_gene_variant|MODIFIER|EPlOSAG00000044528|EPlOSAG00000044528|transcript|EPlOSAT00000045916|lincRNA||n.-1778C>T|||||1778|,A|d…
chr01	2376674	C	CGGTGGT	25652.6	0/0	0/0	1|1	0/0	0/0	1|1	1|1	1|1	0/0	1|1	0/0	1|1	1|1	1|1	0/0	0/0	0/0	0/0	0/0	1|1	0/0	0/0	0/0	0/0	CGGTGGT|conservative_inframe_insertion|MODERATE|OS01G0143800|OS01G0143800|transcript|OS01T0143800-01|protein_coding|1/3|c.36_37insACCACC|p.Ala12_Ala13insThrThr|87/1102|36/828|12/275||,CGGTGGT|conservative_inframe_insertion|MODERATE|OS01G0143800|OS01G0143800|transcript|OS01T0143800-03|protein_coding|1/3|c.36_37insACCACC|p.Ala12_Ala13insThrThr|59/1043|36/828|12/275||,CGGTGGT|downstream_gene_variant…
chr01	2376680	T	C	25222.6	0/0	0/0	1|1	0/0	0/0	1|1	1|1	1|1	0/0	1|1	0/0	1|1	1|1	1|1	0/0	0/0	0/0	0/0	0/0	1|1	0/0	0/0	0/0	0/0	C|missense_variant|MODERATE|OS01G0143800|OS01G0143800|transcript|OS01T0143800-01|protein_coding|1/3|c.31A>G|p.Thr11Ala|82/1102|31/828|11/275||,C|missense_variant|MODERATE|OS01G0143800|OS01G0143800|transcript|OS01T0143800-03|protein_coding|1/3|c.31A>G|p.Thr11Ala|54/1043|31/828|11/275||,C|downstream_gene_variant|MODIFIER|OS01G0143900|OS01G0143900|transcript|OS01T0143900-01|protein_coding||c.*947A>G…
chr01	2385449	AGGC	A	21778.6	0/0	0/0	1|1	0/0	0/0	1|1	1|1	1|1	0/0	1|1	0/0	1/1	1|1	1|1	0/0	0/0	0/0	0/0	0/0	1|1	0/0	0/0	0/0	0/0	A|conservative_inframe_deletion|MODERATE|OS01G0144100|OS01G0144100|transcript|OS01T0144100-01|protein_coding|1/6|c.76_78delGCC|p.Ala26del|144/873|76/597|26/198||,A|upstream_gene_variant|MODIFIER|OS01G0144200|OS01G0144200|transcript|OS01T0144200-01|protein_coding||c.-1014_-1012delGGC|||||923|,A|downstream_gene_variant|MODIFIER|EPlOSAG00000012502|EPlOSAG00000012502|transcript|EPlOSAT00000013890|lin…
chr01	2385518	G	C	17425.6	0/0	0/0	1/1	0/0	0/0	1/1	1/1	1/1	0/0	1/1	0/0	1/1	1/1	1/1	0/0	0/0	0/0	0/0	0/0	1/1	0/0	0/0	0/0	0/0	C|missense_variant|MODERATE|OS01G0144100|OS01G0144100|transcript|OS01T0144100-01|protein_coding|1/6|c.10C>G|p.Pro4Ala|76/873|10/597|4/198||,C|upstream_gene_variant|MODIFIER|OS01G0144200|OS01G0144200|transcript|OS01T0144200-01|protein_coding||c.-946G>C|||||855|,C|downstream_gene_variant|MODIFIER|EPlOSAG00000012502|EPlOSAG00000012502|transcript|EPlOSAT00000013890|lincRNA||n.*936G>C|||||936|
chr01	2387185	T	TG	822.51	0/0	0/0	./.	0/0	0/0	./.	./.	1/1	0/0	0/0	0/0	./.	./.	0/0	0/0	0/0	0/0	0/0	0/0	./.	0/0	0/0	0/0	0/0	TG|frameshift_variant|HIGH|OS01G0144200|OS01G0144200|transcript|OS01T0144200-01|protein_coding|3/8|c.125dupG|p.Thr43fs|217/1056|126/657|42/218||INFO_REALIGN_3_PRIME,TG|upstream_gene_variant|MODIFIER|OS01G0144100|OS01G0144100|transcript|OS01T0144100-01|protein_coding||c.-1659dupC|||||1593|,TG|downstream_gene_variant|MODIFIER|OS01G0144300|OS01G0144300|transcript|OS01T0144300-01|protein_coding||c.*1…
chr01	2397011	G	GT	11085.2	0/0	0/0	1/1	0/0	0/0	1/1	1/1	1/1	0/0	1/1	0/0	1/1	1/1	1/1	0/0	0/0	0/0	0/0	0/0	1/1	0/0	0/0	0/0	0/0	GT|frameshift_variant|HIGH|OS01G0144380|OS01G0144380|transcript|OS01T0144380-01|protein_coding|1/1|c.127_128insT|p.Gly43fs|3530/4810|128/390|43/129||,GT|intron_variant|MODIFIER|OS01G0144340|OS01G0144340|transcript|OS01T0144340-00|protein_coding|1/11|c.101+35_101+36insA||||||
chr01	2397111	A	T	23550.6	0/0	0/0	1|1	0/0	0/0	1|1	1|1	1|1	0/0	1|1	0/0	1/1	1|1	1|1	0/0	0/0	0/0	0/0	0/0	1|1	0/0	0/0	0/0	0/0	T|missense_variant|MODERATE|OS01G0144340|OS01G0144340|transcript|OS01T0144340-00|protein_coding|1/12|c.37T>A|p.Phe13Ile|185/2300|37/2145|13/714||,T|missense_variant|MODERATE|OS01G0144380|OS01G0144380|transcript|OS01T0144380-01|protein_coding|1/1|c.227A>T|p.Lys76Met|3629/4810|227/390|76/129||
chr01	2397112	G	T	23652.6	0/0	0/0	1|1	0/0	0/0	1|1	1|1	1|1	0/0	1|1	0/0	1/1	1|1	1|1	0/0	0/0	0/0	0/0	0/0	1|1	0/0	0/0	0/0	0/0	T|missense_variant|MODERATE|OS01G0144340|OS01G0144340|transcript|OS01T0144340-00|protein_coding|1/12|c.36C>A|p.Asp12Glu|184/2300|36/2145|12/714||,T|missense_variant|MODERATE|OS01G0144380|OS01G0144380|transcript|OS01T0144380-01|protein_coding|1/1|c.228G>T|p.Lys76Asn|3630/4810|228/390|76/129||
chr01	2401001	C	G	22229.6	0/0	0/0	1/1	0/0	0/0	1/1	1/1	1/1	0/0	1/1	0/0	1/1	1/1	1/1	0/0	0/0	0/0	0/0	0/0	1/1	0/0	0/0	0/0	0/0	G|missense_variant|MODERATE|OS01G0144500|OS01G0144500|transcript|OS01T0144500-00|protein_coding|3/3|c.679G>C|p.Gly227Arg|679/735|679/735|227/244||WARNING_TRANSCRIPT_NO_START_CODON
chr01	2402261	C	T	22012.6	0/0	0/0	1/1	0/0	0/0	1/1	1/1	1/1	0/0	1/1	0/0	1/1	1/1	1/1	0/0	0/0	0/0	0/0	0/0	1/1	0/0	0/0	0/0	0/0	T|missense_variant|MODERATE|OS01G0144500|OS01G0144500|transcript|OS01T0144500-00|protein_coding|1/3|c.76G>A|p.Ala26Thr|76/735|76/735|26/244||WARNING_TRANSCRIPT_NO_START_CODON,T|upstream_gene_variant|MODIFIER|OS01G0144600|OS01G0144600|transcript|OS01T0144600-01|protein_coding||c.-1138C>T|||||1015|
chr01	2403600	AGGC	A	20130.6	0/0	0/0	1|1	0/0	0/0	1|1	1|1	1|1	0/0	1|1	0/0	1|1	1|1	1|1	0/0	0/0	0/0	0/0	0/0	1|1	0/0	0/0	0/0	0/0	A|disruptive_inframe_deletion|MODERATE|OS01G0144600|OS01G0144600|transcript|OS01T0144600-01|protein_coding|2/5|c.116_118delCGG|p.Ala39del|239/986|116/603|39/200||INFO_REALIGN_3_PRIME,A|upstream_gene_variant|MODIFIER|OS01G0144500|OS01G0144500|transcript|OS01T0144500-00|protein_coding||c.-1267_-1265delGCC|||||1265|WARNING_TRANSCRIPT_NO_START_CODON
chr01	2403618	C	A	21879.6	0/0	0/0	1|1	0/0	0/0	1|1	1|1	1|1	0/0	1|1	0/0	1|1	1|1	1|1	0/0	0/0	0/0	0/0	0/0	1|1	0/0	0/0	0/0	0/0	A|missense_variant|MODERATE|OS01G0144600|OS01G0144600|transcript|OS01T0144600-01|protein_coding|2/5|c.116C>A|p.Ala39Glu|239/986|116/603|39/200||,A|upstream_gene_variant|MODIFIER|OS01G0144500|OS01G0144500|transcript|OS01T0144500-00|protein_coding||c.-1282G>T|||||1282|WARNING_TRANSCRIPT_NO_START_CODON
chr01	2406554	G	GGA	6629.83	0/0	0/0	1/1	0/0	0/0	1/1	1/1	1/1	0/0	1/1	0/0	1/1	1/1	1/1	0/0	0/0	0/0	0/0	0/0	1/1	0/0	0/0	0/0	0/0	GGA|frameshift_variant&start_lost|HIGH|OS01G0144700|OS01G0144700|transcript|OS01T0144700-01|protein_coding|1/2|c.-1_1dupGA|p.Met1fs|85/604|2/276|1/91||INFO_REALIGN_3_PRIME,GGA|downstream_gene_variant|MODIFIER|OS01G0144600|OS01G0144600|transcript|OS01T0144600-01|protein_coding||c.*867_*868insGA|||||608|
chr01	2414674	T	C	28763.6	0/0	0/0	1|1	0/0	0/0	1|1	1|1	1|1	0/0	1|1	0/0	1|1	1|1	1|1	0/0	0/0	0/0	0/0	0/0	1|1	0/0	0/0	0/0	0/0	C|missense_variant|MODERATE|OS01G0144800|OS01G0144800|transcript|OS01T0144800-01|protein_coding|1/1|c.323T>C|p.Val108Ala|404/802|323/339|108/112||,C|upstream_gene_variant|MODIFIER|OS01G0144900|OS01G0144900|transcript|OS01T0144900-01|protein_coding||c.-2108T>C|||||1969|,C|downstream_gene_variant|MODIFIER|EPlOSAG00000024559|EPlOSAG00000024559|transcript|EPlOSAT00000025947|lincRNA||n.*475T>C|||||475|
chr01	2416800	G	A	17149.6	0/0	0/0	1|1	0/0	0/0	1|1	1|1	1|1	0/0	1|1	0/0	1|1	1|1	1|1	0/0	0/0	0/0	0/0	0/0	1|1	0/0	0/0	0/0	0/0	A|missense_variant|MODERATE|OS01G0144900|OS01G0144900|transcript|OS01T0144900-01|protein_coding|1/1|c.19G>A|p.Val7Met|158/2183|19/270|7/89||,A|downstream_gene_variant|MODIFIER|OS01G0144800|OS01G0144800|transcript|OS01T0144800-01|protein_coding||c.*2110G>A|||||1728|
chr01	2416809	A	C	16633.6	0/0	0/0	1|1	0/0	0/0	1|1	1|1	1|1	0/0	1|1	0/0	1|1	1|1	1|1	0/0	0/0	0/0	0/0	0/0	1|1	0/0	0/0	0/0	0/0	C|missense_variant|MODERATE|OS01G0144900|OS01G0144900|transcript|OS01T0144900-01|protein_coding|1/1|c.28A>C|p.Lys10Gln|167/2183|28/270|10/89||,C|downstream_gene_variant|MODIFIER|OS01G0144800|OS01G0144800|transcript|OS01T0144800-01|protein_coding||c.*2119A>C|||||1737|
chr01	2416831	T	A	10674.6	0/0	0/0	1/1	0/0	0/0	1/1	1/1	1/1	0/0	1/1	0/0	1/1	1/1	1/1	0/0	0/0	0/0	0/0	0/0	1/1	0/0	0/0	0/0	0/0	A|stop_gained|HIGH|OS01G0144900|OS01G0144900|transcript|OS01T0144900-01|protein_coding|1/1|c.50T>A|p.Leu17*|189/2183|50/270|17/89||,A|downstream_gene_variant|MODIFIER|OS01G0144800|OS01G0144800|transcript|OS01T0144800-01|protein_coding||c.*2141T>A|||||1759|
chr01	2416845	A	AGG	10302.6	0/0	0/0	1|1	0/0	0/0	1|1	1|1	1|1	0/0	1|1	0/0	1|1	1|1	1|1	0/0	0/0	0/0	0/0	0/0	1|1	0/0	0/0	0/0	0/0	AGG|frameshift_variant|HIGH|OS01G0144900|OS01G0144900|transcript|OS01T0144900-01|protein_coding|1/1|c.64_65insGG|p.Lys22fs|204/2183|65/270|22/89||,AGG|downstream_gene_variant|MODIFIER|OS01G0144800|OS01G0144800|transcript|OS01T0144800-01|protein_coding||c.*2155_*2156insGG|||||1774|
chr01	2416847	G	T	10462.6	0/0	0/0	1|1	0/0	0/0	1|1	1|1	1|1	0/0	1|1	0/0	1|1	1|1	1|1	0/0	0/0	0/0	0/0	0/0	1|1	0/0	0/0	0/0	0/0	T|missense_variant|MODERATE|OS01G0144900|OS01G0144900|transcript|OS01T0144900-01|protein_coding|1/1|c.66G>T|p.Lys22Asn|205/2183|66/270|22/89||,T|downstream_gene_variant|MODIFIER|OS01G0144800|OS01G0144800|transcript|OS01T0144800-01|protein_coding||c.*2157G>T|||||1775|
chr01	2416849	G	GT	10168.6	0/0	0/0	1|1	0/0	0/0	1|1	1|1	1|1	0/0	1|1	0/0	1|1	1|1	1|1	0/0	0/0	0/0	0/0	0/0	1|1	0/0	0/0	0/0	0/0	GT|frameshift_variant|HIGH|OS01G0144900|OS01G0144900|transcript|OS01T0144900-01|protein_coding|1/1|c.68_69insT|p.Arg23fs|208/2183|69/270|23/89||,GT|downstream_gene_variant|MODIFIER|OS01G0144800|OS01G0144800|transcript|OS01T0144800-01|protein_coding||c.*2159_*2160insT|||||1778|
chr01	2416865	CATGTGTTTACAG	C	12924.6	0/0	0/0	1|1	0/0	0/0	1|1	1|1	1|1	0/0	1|1	0/0	1|1	1|1	1|1	0/0	0/0	0/0	0/0	0/0	1|1	0/0	0/0	0/0	0/0	C|conservative_inframe_deletion|MODERATE|OS01G0144900|OS01G0144900|transcript|OS01T0144900-01|protein_coding|1/1|c.85_96delATGTGTTTACAG|p.Met29_Gln32del|224/2183|85/270|29/89||,C|downstream_gene_variant|MODIFIER|OS01G0144800|OS01G0144800|transcript|OS01T0144800-01|protein_coding||c.*2176_*2187delATGTGTTTACAG|||||1794|
chr01	2416884	C	T	13468.6	0/0	0/0	1|1	0/0	0/0	1|1	1|1	1|1	0/0	1|1	0/0	1|1	1|1	1|1	0/0	0/0	0/0	0/0	0/0	1|1	0/0	0/0	0/0	0/0	T|missense_variant|MODERATE|OS01G0144900|OS01G0144900|transcript|OS01T0144900-01|protein_coding|1/1|c.103C>T|p.Pro35Ser|242/2183|103/270|35/89||,T|downstream_gene_variant|MODIFIER|OS01G0144800|OS01G0144800|transcript|OS01T0144800-01|protein_coding||c.*2194C>T|||||1812|
chr01	2416981	A	G	24613.6	0/0	0/0	1/1	0/0	0/0	1/1	1/1	1/1	0/0	1/1	0/0	1/1	1/1	1/1	0/0	0/0	0/0	0/0	0/0	1/1	0/0	0/0	0/0	0/0	G|missense_variant|MODERATE|OS01G0144900|OS01G0144900|transcript|OS01T0144900-01|protein_coding|1/1|c.200A>G|p.Tyr67Cys|339/2183|200/270|67/89||,G|downstream_gene_variant|MODIFIER|OS01G0144800|OS01G0144800|transcript|OS01T0144800-01|protein_coding||c.*2291A>G|||||1909|
chr01	2500476	G	C	25933.6	0/0	0/0	1/1	0/0	0/0	1/1	1/1	1/1	0/0	1/1	0/0	1/1	1/1	1/1	0/0	0/0	0/0	0/0	0/0	1/1	0/0	0/0	0/0	0/0	C|missense_variant|MODERATE|OS01G0146200|OS01G0146200|transcript|OS01T0146200-01|protein_coding|1/1|c.127G>C|p.Ala43Pro|197/969|127/333|43/110||
chr01	2542247	T	A	9880.9	0/0	0/0	./.	0/0	0/0	1|1	./.	./.	0/0	./.	0/0	1|1	./.	./.	0/0	0/0	0/0	0/0	0/0	1|1	0/0	.	0/0	./.	A|missense_variant|MODERATE|OS01G0146801|OS01G0146801|transcript|OS01T0146801-00|protein_coding|3/3|c.143A>T|p.Gln48Leu|199/496|143/282|48/93||
chr01	2542326	G	A	9664.22	0/0	.	./.	0/0	0/0	1/1	./.	./.	0/0	./.	0/0	1|1	./.	./.	0/0	0/0	0/0	0/0	0/0	1|1	0/0	.	0/0	0/0	A|missense_variant|MODERATE|OS01G0146801|OS01G0146801|transcript|OS01T0146801-00|protein_coding|2/3|c.85C>T|p.Pro29Ser|141/496|85/282|29/93||
chr01	2542329	C	G	9681.87	0/0	.	./.	0/0	0/0	1|1	./.	./.	./.	./.	0/0	1|1	./.	./.	0/0	0/0	0/0	0/0	0/0	1|1	0/0	.	./.	./.	G|missense_variant|MODERATE|OS01G0146801|OS01G0146801|transcript|OS01T0146801-00|protein_coding|2/3|c.82G>C|p.Gly28Arg|138/496|82/282|28/93||
chr01	2551238	C	G	18852.2	0/0	0/0	1/1	0/0	0/0	1/1	1/1	1/1	0/0	1/1	0/0	1/1	1/1	1/1	0/0	0/0	0/0	0/0	0/0	1/1	0/0	0/0	0/0	0/0	G|missense_variant|MODERATE|OS01G0147001|OS01G0147001|transcript|OS01T0147001-00|protein_coding|1/1|c.293C>G|p.Pro98Arg|293/516|293/516|98/171||,G|upstream_gene_variant|MODIFIER|EPlOSAG00000043847|EPlOSAG00000043847|transcript|EPlOSAT00000045235|lincRNA||n.-1903C>G|||||1903|,G|downstream_gene_variant|MODIFIER|EPlOSAG00000043724|EPlOSAG00000043724|transcript|EPlOSAT00000045112|lincRNA||n.*1903G>C|…
chr01	2561318	A	AGGCGGC	17912.8	0/0	0/0	1|1	0/0	0/0	1|1	1|1	1|1	0/0	1|1	0/0	1|1	1|1	1|1	0/0	0/0	0/0	0/0	0/0	1|1	0/0	0/0	0/0	0/0	AGGCGGC|conservative_inframe_insertion|MODERATE|OS01G0147200|OS01G0147200|transcript|OS01T0147200-01|protein_coding|2/11|c.235_240dupGGCGGC|p.Gly79_Gly80dup|334/2130|241/1602|81/533||INFO_REALIGN_3_PRIME,AGGCGGC|conservative_inframe_insertion|MODERATE|OS01G0147200|OS01G0147200|transcript|OS01T0147200-02|protein_coding|2/2|c.235_240dupGGCGGC|p.Gly79_Gly80dup|314/1572|241/717|81/238||INFO_REALIGN_3…
chr01	2561334	G	A	18898.6	0/0	0/0	1|1	0/0	0/0	1|1	1|1	1|1	0/0	1|1	0/0	1|1	1|1	1|1	0/0	0/0	0/0	0/0	0/0	1|1	0/0	0/0	0/0	0/0	A|missense_variant|MODERATE|OS01G0147200|OS01G0147200|transcript|OS01T0147200-01|protein_coding|2/11|c.244G>A|p.Gly82Arg|337/2130|244/1602|82/533||,A|missense_variant|MODERATE|OS01G0147200|OS01G0147200|transcript|OS01T0147200-02|protein_coding|2/2|c.244G>A|p.Gly82Arg|317/1572|244/717|82/238||,A|upstream_gene_variant|MODIFIER|EPlOSAG00000011385|EPlOSAG00000011385|transcript|EPlOSAT00000012773|linc…
chr01	2561466	G	A	17007.6	0/0	0/0	1/1	0/0	0/0	1/1	1/1	1/1	0/0	1/1	0/0	1/1	1/1	1/1	0/0	0/0	0/0	0/0	0/0	1/1	0/0	0/0	0/0	0/0	A|missense_variant|MODERATE|OS01G0147200|OS01G0147200|transcript|OS01T0147200-01|protein_coding|2/11|c.376G>A|p.Gly126Ser|469/2130|376/1602|126/533||,A|missense_variant|MODERATE|OS01G0147200|OS01G0147200|transcript|OS01T0147200-02|protein_coding|2/2|c.376G>A|p.Gly126Ser|449/1572|376/717|126/238||,A|upstream_gene_variant|MODIFIER|EPlOSAG00000011385|EPlOSAG00000011385|transcript|EPlOSAT00000012773|…
chr01	2566745	GGGC	G	13284.6	0/0	0/0	1/1	0/0	0/0	1/1	1/1	1/1	0/0	1/1	0/0	1/1	1/1	1/1	0/0	0/0	0/0	0/0	0/0	1/1	0/0	0/0	0/0	0/0	G|conservative_inframe_deletion|MODERATE|OS01G0147250|OS01G0147250|transcript|OS01T0147250-01|protein_coding|1/1|c.412_414delGCC|p.Ala138del|3110/3193|412/497|138/164||WARNING_TRANSCRIPT_INCOMPLETE,G|upstream_gene_variant|MODIFIER|OS01G0147300|OS01G0147300|transcript|OS01T0147300-01|protein_coding||c.-1305_-1303delGGC|||||1305|,G|downstream_gene_variant|MODIFIER|OS01G0147200|OS01G0147200|transcri…
chr01	2566820	T	C	17567.6	0/0	0/0	1/1	0/0	0/0	1/1	1/1	1/1	0/0	1/1	0/0	1/1	1/1	1/1	0/0	0/0	0/0	0/0	0/0	1/1	0/0	0/0	0/0	0/0	C|missense_variant|MODERATE|OS01G0147250|OS01G0147250|transcript|OS01T0147250-01|protein_coding|1/1|c.340A>G|p.Thr114Ala|3036/3193|340/497|114/164||WARNING_TRANSCRIPT_INCOMPLETE,C|upstream_gene_variant|MODIFIER|OS01G0147300|OS01G0147300|transcript|OS01T0147300-01|protein_coding||c.-1231T>C|||||1231|,C|downstream_gene_variant|MODIFIER|OS01G0147200|OS01G0147200|transcript|OS01T0147200-01|protein_co…
chr01	2566850	C	CCACCACCACCAT	19006.6	0/0	0/0	1/1	0/0	0/0	1/1	1/1	1/1	0/0	1/1	0/0	1/1	1/1	1/1	0/0	0/0	0/0	0/0	0/0	1/1	0/0	0/0	0/0	0/0	CCACCACCACCAT|conservative_inframe_insertion|MODERATE|OS01G0147250|OS01G0147250|transcript|OS01T0147250-01|protein_coding|1/1|c.309_310insATGGTGGTGGTG|p.Pro103_Val104insMetValValVal|3005/3193|309/497|103/164||WARNING_TRANSCRIPT_INCOMPLETE,CCACCACCACCAT|upstream_gene_variant|MODIFIER|OS01G0147300|OS01G0147300|transcript|OS01T0147300-01|protein_coding||c.-1201_-1200insCACCACCACCAT|||||1200|,CCACCAC…
chr01	2566907	C	G	24656.6	0/0	0/0	1|1	0/0	0/0	1|1	1|1	1|1	0/0	1|1	0/0	1|1	1|1	1|1	0/0	0/0	0/0	0/0	0/0	1|1	0/0	0/0	0/0	0/0	G|missense_variant|MODERATE|OS01G0147250|OS01G0147250|transcript|OS01T0147250-01|protein_coding|1/1|c.253G>C|p.Ala85Pro|2949/3193|253/497|85/164||WARNING_TRANSCRIPT_INCOMPLETE,G|upstream_gene_variant|MODIFIER|OS01G0147300|OS01G0147300|transcript|OS01T0147300-01|protein_coding||c.-1144C>G|||||1144|,G|downstream_gene_variant|MODIFIER|OS01G0147200|OS01G0147200|transcript|OS01T0147200-01|protein_codi…
chr01	2566967	A	C	21028.6	0/0	0/0	1/1	0/0	0/0	1/1	1/1	1/1	0/0	1/1	0/0	1/1	1/1	1/1	0/0	0/0	0/0	0/0	0/0	1/1	0/0	0/0	0/0	0/0	C|missense_variant|MODERATE|OS01G0147250|OS01G0147250|transcript|OS01T0147250-01|protein_coding|1/1|c.193T>G|p.Cys65Gly|2889/3193|193/497|65/164||WARNING_TRANSCRIPT_INCOMPLETE,C|upstream_gene_variant|MODIFIER|OS01G0147300|OS01G0147300|transcript|OS01T0147300-01|protein_coding||c.-1084A>C|||||1084|,C|downstream_gene_variant|MODIFIER|OS01G0147200|OS01G0147200|transcript|OS01T0147200-01|protein_codi…
chr01	2567045	G	C	20451.6	0/0	0/0	1/1	0/0	0/0	1/1	1/1	1/1	0/0	1/1	0/0	1/1	1/1	1/1	0/0	0/0	0/0	0/0	0/0	1/1	0/0	0/0	0/0	0/0	C|missense_variant|MODERATE|OS01G0147250|OS01G0147250|transcript|OS01T0147250-01|protein_coding|1/1|c.115C>G|p.Arg39Gly|2811/3193|115/497|39/164||WARNING_TRANSCRIPT_INCOMPLETE,C|upstream_gene_variant|MODIFIER|OS01G0147300|OS01G0147300|transcript|OS01T0147300-01|protein_coding||c.-1006G>C|||||1006|,C|downstream_gene_variant|MODIFIER|OS01G0147200|OS01G0147200|transcript|OS01T0147200-01|protein_codi…
chr01	2567147	CGCA	C	9298.57	0/0	0/0	1|1	0/0	0/0	1|1	1|1	1|1	0/0	1|1	0/0	1|1	1|1	1|1	0/0	0/0	0/0	0/0	0/0	1|1	0/0	0/0	0/0	0/0	C|conservative_inframe_deletion|MODERATE|OS01G0147250|OS01G0147250|transcript|OS01T0147250-01|protein_coding|1/1|c.10_12delTGC|p.Cys4del|2708/3193|10/497|4/164||WARNING_TRANSCRIPT_INCOMPLETE,C|upstream_gene_variant|MODIFIER|OS01G0147300|OS01G0147300|transcript|OS01T0147300-01|protein_coding||c.-903_-901delGCA|||||903|,C|downstream_gene_variant|MODIFIER|OS01G0147200|OS01G0147200|transcript|OS01T01…
chr01	2567153	AC	A	9394.57	0/0	0/0	1|1	0/0	0/0	1|1	1|1	1|1	0/0	1|1	0/0	1|1	1|1	1|1	0/0	0/0	0/0	0/0	0/0	1|1	0/0	0/0	0/0	0/0	A|frameshift_variant|HIGH|OS01G0147250|OS01G0147250|transcript|OS01T0147250-01|protein_coding|1/1|c.6delG|p.Trp3fs|2702/3193|6/497|2/164||WARNING_TRANSCRIPT_INCOMPLETE,A|upstream_gene_variant|MODIFIER|OS01G0147300|OS01G0147300|transcript|OS01T0147300-01|protein_coding||c.-897delC|||||897|,A|downstream_gene_variant|MODIFIER|OS01G0147200|OS01G0147200|transcript|OS01T0147200-01|protein_coding||c.*22…
chr01	2568707	A	G	21862.6	0/0	0/0	1/1	0/0	0/0	1/1	1/1	1/1	0/0	1/1	0/0	1/1	1/1	1/1	0/0	0/0	0/0	0/0	0/0	1/1	0/0	0/0	0/0	0/0	G|missense_variant|MODERATE|OS01G0147300|OS01G0147300|transcript|OS01T0147300-01|protein_coding|3/4|c.476A>G|p.Asn159Ser|476/1294|476/615|159/204||,G|5_prime_UTR_variant|MODIFIER|OS01G0147250|OS01G0147250|transcript|OS01T0147250-01|protein_coding|1/1|c.-1548T>C|||||1548|WARNING_TRANSCRIPT_INCOMPLETE,G|downstream_gene_variant|MODIFIER|OS01G0147400|OS01G0147400|transcript|OS01T0147400-00|protein_co…
chr01	2570133	T	G	24460.6	0/0	0/0	1|1	0/0	0/0	1|1	1|1	1|1	0/0	1|1	0/0	1|1	1|1	1|1	0/0	0/0	0/0	0/0	0/0	1|1	0/0	0/0	0/0	0/0	G|missense_variant|MODERATE|OS01G0147400|OS01G0147400|transcript|OS01T0147400-00|protein_coding|3/3|c.662A>C|p.Lys221Thr|662/723|662/723|221/240||,G|upstream_gene_variant|MODIFIER|OS01G0147250|OS01G0147250|transcript|OS01T0147250-01|protein_coding||c.-2974A>C|||||278|WARNING_TRANSCRIPT_INCOMPLETE,G|downstream_gene_variant|MODIFIER|OS01G0147300|OS01G0147300|transcript|OS01T0147300-01|protein_codin…
chr01	2570182	T	C	23531.6	0/0	0/0	1|1	0/0	0/0	1|1	1|1	1|1	0/0	1|1	0/0	1|1	1|1	1|1	0/0	0/0	0/0	0/0	0/0	1|1	0/0	0/0	0/0	0/0	C|missense_variant|MODERATE|OS01G0147400|OS01G0147400|transcript|OS01T0147400-00|protein_coding|3/3|c.613A>G|p.Thr205Ala|613/723|613/723|205/240||,C|upstream_gene_variant|MODIFIER|OS01G0147250|OS01G0147250|transcript|OS01T0147250-01|protein_coding||c.-3023A>G|||||327|WARNING_TRANSCRIPT_INCOMPLETE,C|downstream_gene_variant|MODIFIER|OS01G0147300|OS01G0147300|transcript|OS01T0147300-01|protein_codin…
chr01	2570185	G	A	23861.6	0/0	0/0	1|1	0/0	0/0	1|1	1|1	1|1	0/0	1|1	0/0	1|1	1|1	1|1	0/0	0/0	0/0	0/0	0/0	1|1	0/0	0/0	0/0	0/0	A|missense_variant|MODERATE|OS01G0147400|OS01G0147400|transcript|OS01T0147400-00|protein_coding|3/3|c.610C>T|p.His204Tyr|610/723|610/723|204/240||,A|upstream_gene_variant|MODIFIER|OS01G0147250|OS01G0147250|transcript|OS01T0147250-01|protein_coding||c.-3026C>T|||||330|WARNING_TRANSCRIPT_INCOMPLETE,A|downstream_gene_variant|MODIFIER|OS01G0147300|OS01G0147300|transcript|OS01T0147300-01|protein_codin…
chr01	2570193	C	T	24266.6	0/0	0/0	1|1	0/0	0/0	1|1	1|1	1|1	0/0	1|1	0/0	1|1	1|1	1|1	0/0	0/0	0/0	0/0	0/0	1|1	0/0	0/0	0/0	0/0	T|missense_variant|MODERATE|OS01G0147400|OS01G0147400|transcript|OS01T0147400-00|protein_coding|3/3|c.602G>A|p.Arg201His|602/723|602/723|201/240||,T|upstream_gene_variant|MODIFIER|OS01G0147250|OS01G0147250|transcript|OS01T0147250-01|protein_coding||c.-3034G>A|||||338|WARNING_TRANSCRIPT_INCOMPLETE,T|downstream_gene_variant|MODIFIER|OS01G0147300|OS01G0147300|transcript|OS01T0147300-01|protein_codin…
chr01	2570283	T	G	25224.6	0/0	0/0	1/1	0/0	0/0	1/1	1/1	1/1	0/0	1/1	0/0	1/1	1/1	1/1	0/0	0/0	0/0	0/0	0/0	1/1	0/0	0/0	0/0	0/0	G|missense_variant|MODERATE|OS01G0147400|OS01G0147400|transcript|OS01T0147400-00|protein_coding|3/3|c.512A>C|p.Gln171Pro|512/723|512/723|171/240||,G|upstream_gene_variant|MODIFIER|OS01G0147250|OS01G0147250|transcript|OS01T0147250-01|protein_coding||c.-3124A>C|||||428|WARNING_TRANSCRIPT_INCOMPLETE,G|downstream_gene_variant|MODIFIER|OS01G0147300|OS01G0147300|transcript|OS01T0147300-01|protein_codin…
chr01	2570516	T	C	25628.6	0/0	0/0	1|1	0/0	0/0	1|1	1|1	1|1	0/0	1|1	0/0	1|1	1|1	1|1	0/0	0/0	0/0	0/0	0/0	1|1	0/0	0/0	0/0	0/0	C|missense_variant|MODERATE|OS01G0147400|OS01G0147400|transcript|OS01T0147400-00|protein_coding|2/3|c.391A>G|p.Arg131Gly|391/723|391/723|131/240||,C|upstream_gene_variant|MODIFIER|OS01G0147250|OS01G0147250|transcript|OS01T0147250-01|protein_coding||c.-3357A>G|||||661|WARNING_TRANSCRIPT_INCOMPLETE,C|downstream_gene_variant|MODIFIER|OS01G0147300|OS01G0147300|transcript|OS01T0147300-01|protein_codin…
chr01	2570526	C	A	26061.6	0/0	0/0	1|1	0/0	0/0	1|1	1|1	1|1	0/0	1|1	0/0	1|1	1|1	1|1	0/0	0/0	0/0	0/0	0/0	1|1	0/0	0/0	0/0	0/0	A|missense_variant|MODERATE|OS01G0147400|OS01G0147400|transcript|OS01T0147400-00|protein_coding|2/3|c.381G>T|p.Glu127Asp|381/723|381/723|127/240||,A|upstream_gene_variant|MODIFIER|OS01G0147250|OS01G0147250|transcript|OS01T0147250-01|protein_coding||c.-3367G>T|||||671|WARNING_TRANSCRIPT_INCOMPLETE,A|downstream_gene_variant|MODIFIER|OS01G0147300|OS01G0147300|transcript|OS01T0147300-01|protein_codin…
chr01	2570536	T	C	25282.6	0/0	0/0	1|1	0/0	0/0	1|1	1|1	1|1	0/0	1|1	0/0	1|1	1|1	1|1	0/0	0/0	0/0	0/0	0/0	1|1	0/0	0/0	0/0	0/0	C|missense_variant|MODERATE|OS01G0147400|OS01G0147400|transcript|OS01T0147400-00|protein_coding|2/3|c.371A>G|p.Lys124Arg|371/723|371/723|124/240||,C|upstream_gene_variant|MODIFIER|OS01G0147250|OS01G0147250|transcript|OS01T0147250-01|protein_coding||c.-3377A>G|||||681|WARNING_TRANSCRIPT_INCOMPLETE,C|downstream_gene_variant|MODIFIER|OS01G0147300|OS01G0147300|transcript|OS01T0147300-01|protein_codin…
chr01	2570599	A	G	24848.6	0/0	0/0	1|1	0/0	0/0	1|1	1|1	1|1	0/0	1|1	0/0	1|1	1|1	1|1	0/0	0/0	0/0	0/0	0/0	1|1	0/0	0/0	0/0	0/0	G|missense_variant|MODERATE|OS01G0147400|OS01G0147400|transcript|OS01T0147400-00|protein_coding|2/3|c.308T>C|p.Ile103Thr|308/723|308/723|103/240||,G|upstream_gene_variant|MODIFIER|OS01G0147250|OS01G0147250|transcript|OS01T0147250-01|protein_coding||c.-3440T>C|||||744|WARNING_TRANSCRIPT_INCOMPLETE,G|downstream_gene_variant|MODIFIER|OS01G0147300|OS01G0147300|transcript|OS01T0147300-01|protein_codin…
chr01	2570609	T	C	24987.6	0/0	0/0	1|1	0/0	0/0	1|1	1|1	1|1	0/0	1|1	0/0	1|1	1|1	1|1	0/0	0/0	0/0	0/0	0/0	1|1	0/0	0/0	0/0	0/0	C|missense_variant|MODERATE|OS01G0147400|OS01G0147400|transcript|OS01T0147400-00|protein_coding|2/3|c.298A>G|p.Thr100Ala|298/723|298/723|100/240||,C|upstream_gene_variant|MODIFIER|OS01G0147250|OS01G0147250|transcript|OS01T0147250-01|protein_coding||c.-3450A>G|||||754|WARNING_TRANSCRIPT_INCOMPLETE,C|downstream_gene_variant|MODIFIER|OS01G0147300|OS01G0147300|transcript|OS01T0147300-01|protein_codin…
chr01	2570764	T	C	24653.6	0/0	0/0	1/1	0/0	0/0	1/1	1/1	1/1	0/0	1/1	0/0	1/1	1/1	1/1	0/0	0/0	0/0	0/0	0/0	1/1	0/0	0/0	0/0	0/0	C|missense_variant|MODERATE|OS01G0147400|OS01G0147400|transcript|OS01T0147400-00|protein_coding|1/3|c.247A>G|p.Lys83Glu|247/723|247/723|83/240||,C|upstream_gene_variant|MODIFIER|OS01G0147250|OS01G0147250|transcript|OS01T0147250-01|protein_coding||c.-3605A>G|||||909|WARNING_TRANSCRIPT_INCOMPLETE,C|downstream_gene_variant|MODIFIER|OS01G0147300|OS01G0147300|transcript|OS01T0147300-01|protein_coding|…
chr01	2570817	A	G	22883.6	0/0	0/0	1/1	0/0	0/0	1/1	1/1	1/1	0/0	1/1	0/0	1/1	1/1	1/1	0/0	0/0	0/0	0/0	0/0	1/1	0/0	0/0	0/0	0/0	G|missense_variant|MODERATE|OS01G0147400|OS01G0147400|transcript|OS01T0147400-00|protein_coding|1/3|c.194T>C|p.Val65Ala|194/723|194/723|65/240||,G|upstream_gene_variant|MODIFIER|OS01G0147250|OS01G0147250|transcript|OS01T0147250-01|protein_coding||c.-3658T>C|||||962|WARNING_TRANSCRIPT_INCOMPLETE,G|downstream_gene_variant|MODIFIER|OS01G0147300|OS01G0147300|transcript|OS01T0147300-01|protein_coding|…
chr01	2570860	T	C	23613.6	0/0	0/0	1|1	0/0	0/0	1|1	1|1	1|1	0/0	1|1	0/0	1|1	1|1	1|1	0/0	0/0	0/0	0/0	0/0	1|1	0/0	0/0	0/0	0/0	C|missense_variant|MODERATE|OS01G0147400|OS01G0147400|transcript|OS01T0147400-00|protein_coding|1/3|c.151A>G|p.Ile51Val|151/723|151/723|51/240||,C|upstream_gene_variant|MODIFIER|OS01G0147250|OS01G0147250|transcript|OS01T0147250-01|protein_coding||c.-3701A>G|||||1005|WARNING_TRANSCRIPT_INCOMPLETE,C|downstream_gene_variant|MODIFIER|OS01G0147300|OS01G0147300|transcript|OS01T0147300-01|protein_coding…
chr01	2570891	C	A	22615.6	0/0	0/0	1|1	0/0	0/0	1|1	1|1	1|1	0/0	1|1	0/0	1|1	1|1	1|1	0/0	0/0	0/0	0/0	0/0	1|1	0/0	0/0	0/0	0/0	A|missense_variant|MODERATE|OS01G0147400|OS01G0147400|transcript|OS01T0147400-00|protein_coding|1/3|c.120G>T|p.Lys40Asn|120/723|120/723|40/240||,A|upstream_gene_variant|MODIFIER|OS01G0147250|OS01G0147250|transcript|OS01T0147250-01|protein_coding||c.-3732G>T|||||1036|WARNING_TRANSCRIPT_INCOMPLETE,A|downstream_gene_variant|MODIFIER|OS01G0147300|OS01G0147300|transcript|OS01T0147300-01|protein_coding…
chr01	2570896	T	C	22675.6	0/0	0/0	1|1	0/0	0/0	1|1	1|1	1|1	0/0	1|1	0/0	1|1	1|1	1|1	0/0	0/0	0/0	0/0	0/0	1|1	0/0	0/0	0/0	0/0	C|missense_variant|MODERATE|OS01G0147400|OS01G0147400|transcript|OS01T0147400-00|protein_coding|1/3|c.115A>G|p.Arg39Gly|115/723|115/723|39/240||,C|upstream_gene_variant|MODIFIER|OS01G0147250|OS01G0147250|transcript|OS01T0147250-01|protein_coding||c.-3737A>G|||||1041|WARNING_TRANSCRIPT_INCOMPLETE,C|downstream_gene_variant|MODIFIER|OS01G0147300|OS01G0147300|transcript|OS01T0147300-01|protein_coding…
chr01	2570900	G	T	22632.6	0/0	0/0	1|1	0/0	0/0	1|1	1|1	1|1	0/0	1|1	0/0	1|1	1|1	1|1	0/0	0/0	0/0	0/0	0/0	1|1	0/0	0/0	0/0	0/0	T|missense_variant|MODERATE|OS01G0147400|OS01G0147400|transcript|OS01T0147400-00|protein_coding|1/3|c.111C>A|p.Ser37Arg|111/723|111/723|37/240||,T|upstream_gene_variant|MODIFIER|OS01G0147250|OS01G0147250|transcript|OS01T0147250-01|protein_coding||c.-3741C>A|||||1045|WARNING_TRANSCRIPT_INCOMPLETE,T|downstream_gene_variant|MODIFIER|OS01G0147300|OS01G0147300|transcript|OS01T0147300-01|protein_coding…
chr01	2570908	C	T	22296.6	0/0	0/0	1|1	0/0	0/0	1|1	1|1	1|1	0/0	1|1	0/0	1|1	1|1	1|1	0/0	0/0	0/0	0/0	0/0	1|1	0/0	0/0	0/0	0/0	T|missense_variant|MODERATE|OS01G0147400|OS01G0147400|transcript|OS01T0147400-00|protein_coding|1/3|c.103G>A|p.Gly35Arg|103/723|103/723|35/240||,T|upstream_gene_variant|MODIFIER|OS01G0147250|OS01G0147250|transcript|OS01T0147250-01|protein_coding||c.-3749G>A|||||1053|WARNING_TRANSCRIPT_INCOMPLETE,T|downstream_gene_variant|MODIFIER|OS01G0147300|OS01G0147300|transcript|OS01T0147300-01|protein_coding…
chr01	2570940	A	G	24226.6	0/0	0/0	1|1	0/0	0/0	1|1	1|1	1|1	0/0	1|1	0/0	1|1	1|1	1|1	0/0	0/0	0/0	0/0	0/0	1|1	0/0	0/0	0/0	0/0	G|missense_variant|MODERATE|OS01G0147400|OS01G0147400|transcript|OS01T0147400-00|protein_coding|1/3|c.71T>C|p.Ile24Thr|71/723|71/723|24/240||,G|upstream_gene_variant|MODIFIER|OS01G0147250|OS01G0147250|transcript|OS01T0147250-01|protein_coding||c.-3781T>C|||||1085|WARNING_TRANSCRIPT_INCOMPLETE,G|downstream_gene_variant|MODIFIER|OS01G0147300|OS01G0147300|transcript|OS01T0147300-01|protein_coding||c…
chr01	2570944	A	C	24858.6	0/0	0/0	1|1	0/0	0/0	1|1	1|1	1|1	0/0	1|1	0/0	1|1	1|1	1|1	0/0	0/0	0/0	0/0	0/0	1|1	0/0	0/0	0/0	0/0	C|missense_variant|MODERATE|OS01G0147400|OS01G0147400|transcript|OS01T0147400-00|protein_coding|1/3|c.67T>G|p.Ser23Ala|67/723|67/723|23/240||,C|upstream_gene_variant|MODIFIER|OS01G0147250|OS01G0147250|transcript|OS01T0147250-01|protein_coding||c.-3785T>G|||||1089|WARNING_TRANSCRIPT_INCOMPLETE,C|downstream_gene_variant|MODIFIER|OS01G0147300|OS01G0147300|transcript|OS01T0147300-01|protein_coding||c…
chr01	2570953	A	C	24521.6	0/0	0/0	1|1	0/0	0/0	1|1	1|1	1|1	0/0	1|1	0/0	1|1	1|1	1|1	0/0	0/0	0/0	0/0	0/0	1|1	0/0	0/0	0/0	0/0	C|missense_variant|MODERATE|OS01G0147400|OS01G0147400|transcript|OS01T0147400-00|protein_coding|1/3|c.58T>G|p.Ser20Ala|58/723|58/723|20/240||,C|upstream_gene_variant|MODIFIER|OS01G0147250|OS01G0147250|transcript|OS01T0147250-01|protein_coding||c.-3794T>G|||||1098|WARNING_TRANSCRIPT_INCOMPLETE,C|downstream_gene_variant|MODIFIER|OS01G0147300|OS01G0147300|transcript|OS01T0147300-01|protein_coding||c…
chr01	2570986	T	G	21008.6	0/0	0/0	1/1	0/0	0/0	1/1	1/1	1/1	0/0	1/1	0/0	1/1	1/1	1/1	0/0	0/0	0/0	0/0	0/0	1/1	0/0	0/0	0/0	0/0	G|missense_variant|MODERATE|OS01G0147400|OS01G0147400|transcript|OS01T0147400-00|protein_coding|1/3|c.25A>C|p.Asn9His|25/723|25/723|9/240||,G|upstream_gene_variant|MODIFIER|OS01G0147250|OS01G0147250|transcript|OS01T0147250-01|protein_coding||c.-3827A>C|||||1131|WARNING_TRANSCRIPT_INCOMPLETE,G|downstream_gene_variant|MODIFIER|OS01G0147300|OS01G0147300|transcript|OS01T0147300-01|protein_coding||c.*…
chr01	2571004	C	G	21801.6	0/0	0/0	1|1	0/0	0/0	1|1	1|1	1|1	0/0	1|1	0/0	1|1	1|1	1|1	0/0	0/0	0/0	0/0	0/0	1|1	0/0	0/0	0/0	0/0	G|missense_variant|MODERATE|OS01G0147400|OS01G0147400|transcript|OS01T0147400-00|protein_coding|1/3|c.7G>C|p.Ala3Pro|7/723|7/723|3/240||,G|upstream_gene_variant|MODIFIER|OS01G0147250|OS01G0147250|transcript|OS01T0147250-01|protein_coding||c.-3845G>C|||||1149|WARNING_TRANSCRIPT_INCOMPLETE,G|downstream_gene_variant|MODIFIER|OS01G0147300|OS01G0147300|transcript|OS01T0147300-01|protein_coding||c.*165…
chr01	2573051	A	T	23784.6	0/0	0/0	1|1	0/0	0/0	1|1	1|1	1|1	0/0	1|1	0/0	1|1	1|1	1|1	0/0	0/0	0/0	0/0	0/0	1|1	0/0	0/0	0/0	0/0	T|stop_lost&splice_region_variant|HIGH|OS01G0147600|OS01G0147600|transcript|OS01T0147600-00|protein_coding|6/6|c.778T>A|p.Ter260Lysext*?|778/780|778/780|260/259||,T|upstream_gene_variant|MODIFIER|EPlOSAG00000050078|EPlOSAG00000050078|transcript|EPlOSAT00000051466|lincRNA||n.-453A>T|||||453|
chr01	2573969	CGACGA	C	8246.58	0/0	0/0	1|1	0/0	0/0	1|1	1|1	1|1	0/0	1|1	0/0	1|1	1|1	1|1	0/0	0/0	0/0	0/0	0/0	1|1	0/0	0/0	0/0	0/0	C|frameshift_variant|HIGH|OS01G0147600|OS01G0147600|transcript|OS01T0147600-00|protein_coding|4/6|c.507_511delTCGTC|p.Arg170fs|511/780|507/780|169/259||,C|upstream_gene_variant|MODIFIER|EPlOSAG00000018624|EPlOSAG00000018624|transcript|EPlOSAT00000020012|lincRNA||n.-1396_-1392delGACGA|||||1396|,C|downstream_gene_variant|MODIFIER|EPlOSAG00000050078|EPlOSAG00000050078|transcript|EPlOSAT00000051466|l…
chr01	2573980	CTCCTTCTCGACGCACGAGTCCTTCTCCGTCTCGCCGCCGCCGGGGCCCTT	C	8667.56	0/0	0/0	1|1	0/0	0/0	1|1	1|1	1|1	0/0	1|1	0/0	1|1	1|1	1|1	0/0	0/0	0/0	0/0	0/0	1|1	0/0	0/0	0/0	0/0	C|frameshift_variant|HIGH|OS01G0147600|OS01G0147600|transcript|OS01T0147600-00|protein_coding|4/6|c.451_500delAAGGGCCCCGGCGGCGGCGAGACGGAGAAGGACTCGTGCGTCGAGAAGGA|p.Lys151fs|500/780|451/780|151/259||,C|upstream_gene_variant|MODIFIER|EPlOSAG00000018624|EPlOSAG00000018624|transcript|EPlOSAT00000020012|lincRNA||n.-1385_-1336delTCCTTCTCGACGCACGAGTCCTTCTCCGTCTCGCCGCCGCCGGGGCCCTT|||||1385|,C|downstream_g…
chr01	2574044	CCCT	C	7224.25	0/0	0/0	1/1	0/0	0/0	1|1	1|1	1|1	0/0	1|1	0/0	./.	1|1	1|1	0/0	0/0	0/0	0/0	0/0	1|1	0/0	0/0	0/0	0/0	C|disruptive_inframe_deletion&splice_region_variant|MODERATE|OS01G0147600|OS01G0147600|transcript|OS01T0147600-00|protein_coding|4/6|c.434_436delAGG|p.Glu145del|436/780|434/780|145/259||,C|upstream_gene_variant|MODIFIER|EPlOSAG00000018624|EPlOSAG00000018624|transcript|EPlOSAT00000020012|lincRNA||n.-1321_-1319delCCT|||||1321|,C|downstream_gene_variant|MODIFIER|EPlOSAG00000050078|EPlOSAG00000050078…
chr01	2576939	G	C	21332.6	0/0	0/0	1|1	0/0	0/0	1|1	1|1	1|1	0/0	1|1	0/0	1|1	1|1	1|1	0/0	0/0	0/0	0/0	0/0	1|1	0/0	0/0	0/0	0/0	C|missense_variant|MODERATE|OS01G0147600|OS01G0147600|transcript|OS01T0147600-00|protein_coding|3/6|c.346C>G|p.Gln116Glu|346/780|346/780|116/259||,C|upstream_gene_variant|MODIFIER|OS01G0147650|OS01G0147650|transcript|OS01T0147650-00|lincRNA||n.-1375C>G|||||1375|,C|upstream_gene_variant|MODIFIER|EPlOSAG00000033692|EPlOSAG00000033692|transcript|EPlOSAT00000035080|lincRNA||n.-1566G>C|||||1566|,C|dow…
chr01	2576944	C	T	21345.6	0/0	0/0	1|1	0/0	0/0	1|1	1|1	1|1	0/0	1|1	0/0	1|1	1|1	1|1	0/0	0/0	0/0	0/0	0/0	1|1	0/0	0/0	0/0	0/0	T|missense_variant|MODERATE|OS01G0147600|OS01G0147600|transcript|OS01T0147600-00|protein_coding|3/6|c.341G>A|p.Arg114Lys|341/780|341/780|114/259||,T|upstream_gene_variant|MODIFIER|OS01G0147650|OS01G0147650|transcript|OS01T0147650-00|lincRNA||n.-1380G>A|||||1380|,T|upstream_gene_variant|MODIFIER|EPlOSAG00000033692|EPlOSAG00000033692|transcript|EPlOSAT00000035080|lincRNA||n.-1561C>T|||||1561|,T|dow…
chr01	2577035	A	C	18892.6	0/0	0/0	1/1	0/0	0/0	1/1	1/1	1/1	0/0	1/1	0/0	1/1	1/1	1/1	0/0	0/0	0/0	0/0	0/0	1/1	0/0	0/0	0/0	0/0	C|missense_variant|MODERATE|OS01G0147600|OS01G0147600|transcript|OS01T0147600-00|protein_coding|3/6|c.250T>G|p.Ser84Ala|250/780|250/780|84/259||,C|upstream_gene_variant|MODIFIER|OS01G0147650|OS01G0147650|transcript|OS01T0147650-00|lincRNA||n.-1471T>G|||||1471|,C|upstream_gene_variant|MODIFIER|EPlOSAG00000033692|EPlOSAG00000033692|transcript|EPlOSAT00000035080|lincRNA||n.-1470A>C|||||1470|,C|downs…
chr01	2577172	GAAAT	G	19287.6	0/0	0/0	1|1	0/0	0/0	1|1	1|1	1|1	0/0	1|1	0/0	1|1	1|1	1|1	0/0	0/0	0/0	0/0	0/0	1|1	0/0	0/0	0/0	0/0	G|frameshift_variant|HIGH|OS01G0147600|OS01G0147600|transcript|OS01T0147600-00|protein_coding|2/6|c.193_196delATTT|p.Ile65fs|196/780|193/780|65/259||,G|upstream_gene_variant|MODIFIER|OS01G0147650|OS01G0147650|transcript|OS01T0147650-00|lincRNA||n.-1612_-1609delATTT|||||1609|,G|upstream_gene_variant|MODIFIER|EPlOSAG00000033692|EPlOSAG00000033692|transcript|EPlOSAT00000035080|lincRNA||n.-1332_-1329…
chr01	2577177	CTGCAGCTGATGAGGTGTCTCAACTTCAGA	C	19171.6	0/0	0/0	1|1	0/0	0/0	1|1	1|1	1|1	0/0	1|1	0/0	1|1	1|1	1|1	0/0	0/0	0/0	0/0	0/0	1|1	0/0	0/0	0/0	0/0	C|frameshift_variant|HIGH|OS01G0147600|OS01G0147600|transcript|OS01T0147600-00|protein_coding|2/6|c.163_191delTCTGAAGTTGAGACACCTCATCAGCTGCA|p.Ser55fs|191/780|163/780|55/259||,C|upstream_gene_variant|MODIFIER|OS01G0147650|OS01G0147650|transcript|OS01T0147650-00|lincRNA||n.-1642_-1614delTCTGAAGTTGAGACACCTCATCAGCTGCA|||||1614|,C|upstream_gene_variant|MODIFIER|EPlOSAG00000033692|EPlOSAG00000033692|tr…
chr01	2577229	T	C	18094.6	0/0	0/0	1|1	0/0	0/0	1|1	1|1	1|1	0/0	1|1	0/0	1|1	1|1	1|1	0/0	0/0	0/0	0/0	0/0	1|1	0/0	0/0	0/0	0/0	C|missense_variant|MODERATE|OS01G0147600|OS01G0147600|transcript|OS01T0147600-00|protein_coding|2/6|c.140A>G|p.Gln47Arg|140/780|140/780|47/259||,C|upstream_gene_variant|MODIFIER|OS01G0147650|OS01G0147650|transcript|OS01T0147650-00|lincRNA||n.-1665A>G|||||1665|,C|upstream_gene_variant|MODIFIER|EPlOSAG00000033692|EPlOSAG00000033692|transcript|EPlOSAT00000035080|lincRNA||n.-1276T>C|||||1276|,C|downs…
chr01	2577282	C	G	16433.6	0/0	0/0	1/1	0/0	0/0	1/1	1/1	1/1	0/0	1/1	0/0	1/1	1/1	1/1	0/0	0/0	0/0	0/0	0/0	1/1	0/0	0/0	0/0	0/0	G|missense_variant|MODERATE|OS01G0147600|OS01G0147600|transcript|OS01T0147600-00|protein_coding|2/6|c.87G>C|p.Lys29Asn|87/780|87/780|29/259||,G|upstream_gene_variant|MODIFIER|OS01G0147650|OS01G0147650|transcript|OS01T0147650-00|lincRNA||n.-1718G>C|||||1718|,G|upstream_gene_variant|MODIFIER|EPlOSAG00000033692|EPlOSAG00000033692|transcript|EPlOSAT00000035080|lincRNA||n.-1223C>G|||||1223|,G|downstre…
chr01	2577394	TGA	T,TTTTTTTTTTTGAAACTAAACCGGCAGA	1397.93	0/0	0/0	2/2	0/0	0/0	1|1	1|1	./.	0/0	./.	0/0	./.	1|1	./.	0/0	0/0	0/0	0/0	0/0	./.	0/0	0/0	0/0	0/0	TTTTTTTTTTTGAAACTAAACCGGCAGA|frameshift_variant|HIGH|OS01G0147600|OS01G0147600|transcript|OS01T0147600-00|protein_coding|1/6|c.21_22insTGCCGGTTTAGTTTCAAAAAAAAAA|p.Lys8fs|21/780|21/780|7/259||,T|frameshift_variant|HIGH|OS01G0147600|OS01G0147600|transcript|OS01T0147600-00|protein_coding|1/6|c.20_21delTC|p.Ile7fs|21/780|20/780|7/259||,TTTTTTTTTTTGAAACTAAACCGGCAGA|upstream_gene_variant|MODIFIER|OS01G…
chr01	2577398	G	T	831.28	0/0	0/0	./.	0/0	0/0	1|1	1|1	0/0	0/0	0/0	0/0	0/0	1|1	./.	0/0	0/0	0/0	0/0	0/0	0/0	0/0	0/0	0/0	0/0	T|missense_variant|MODERATE|OS01G0147600|OS01G0147600|transcript|OS01T0147600-00|protein_coding|1/6|c.18C>A|p.Asn6Lys|18/780|18/780|6/259||,T|upstream_gene_variant|MODIFIER|OS01G0147650|OS01G0147650|transcript|OS01T0147650-00|lincRNA||n.-1834C>A|||||1834|,T|upstream_gene_variant|MODIFIER|EPlOSAG00000033692|EPlOSAG00000033692|transcript|EPlOSAT00000035080|lincRNA||n.-1107G>T|||||1107|,T|downstream…
chr01	2577400	T	TTTTTTTG	822.63	0/0	0/0	./.	0/0	0/0	1|1	1|1	0/0	0/0	0/0	0/0	0/0	1|1	./.	0/0	0/0	0/0	0/0	0/0	0/0	0/0	0/0	0/0	0/0	TTTTTTTG|frameshift_variant|HIGH|OS01G0147600|OS01G0147600|transcript|OS01T0147600-00|protein_coding|1/6|c.15_16insCAAAAAA|p.Asn6fs|15/780|15/780|5/259||,TTTTTTTG|upstream_gene_variant|MODIFIER|OS01G0147650|OS01G0147650|transcript|OS01T0147650-00|lincRNA||n.-1837_-1836insCAAAAAA|||||1837|,TTTTTTTG|upstream_gene_variant|MODIFIER|EPlOSAG00000033692|EPlOSAG00000033692|transcript|EPlOSAT00000035080|l…
chr01	2577405	G	T	191.32	0/0	0/0	./.	0/0	0/0	./.	1|1	0/0	0/0	0/0	0/0	0/0	1|1	./.	0/0	0/0	0/0	0/0	0/0	0/0	0/0	0/0	0/0	0/0	T|missense_variant|MODERATE|OS01G0147600|OS01G0147600|transcript|OS01T0147600-00|protein_coding|1/6|c.11C>A|p.Ser4Tyr|11/780|11/780|4/259||,T|upstream_gene_variant|MODIFIER|OS01G0147650|OS01G0147650|transcript|OS01T0147650-00|lincRNA||n.-1841C>A|||||1841|,T|upstream_gene_variant|MODIFIER|EPlOSAG00000033692|EPlOSAG00000033692|transcript|EPlOSAT00000035080|lincRNA||n.-1100G>T|||||1100|,T|downstream…
chr01	2577408	G	A	115.63	0/0	0/0	./.	0/0	0/0	./.	1|1	0/0	0/0	0/0	0/0	0/0	./.	./.	0/0	0/0	0/0	0/0	0/0	0/0	0/0	0/0	0/0	0/0	A|missense_variant|MODERATE|OS01G0147600|OS01G0147600|transcript|OS01T0147600-00|protein_coding|1/6|c.8C>T|p.Ala3Val|8/780|8/780|3/259||,A|upstream_gene_variant|MODIFIER|OS01G0147650|OS01G0147650|transcript|OS01T0147650-00|lincRNA||n.-1844C>T|||||1844|,A|upstream_gene_variant|MODIFIER|EPlOSAG00000033692|EPlOSAG00000033692|transcript|EPlOSAT00000035080|lincRNA||n.-1097G>A|||||1097|,A|downstream_ge…
chr01	2581292	C	T	22584.6	0/0	0/0	1/1	0/0	0/0	1/1	1/1	1/1	0/0	1/1	0/0	1/1	1/1	1/1	0/0	0/0	0/0	0/0	0/0	1/1	0/0	0/0	0/0	0/0	T|missense_variant|MODERATE|OS01G0147700|OS01G0147700|transcript|OS01T0147700-01|protein_coding|2/6|c.1253G>A|p.Ser418Asn|1358/2554|1253/2103|418/700||
chr01	2582408	G	A	26461.6	0/0	0/0	1|1	0/0	0/0	1|1	1|1	1|1	0/0	1|1	0/0	1|1	1|1	1|1	0/0	0/0	0/0	0/0	0/0	1|1	0/0	0/0	0/0	0/0	A|missense_variant|MODERATE|OS01G0147700|OS01G0147700|transcript|OS01T0147700-01|protein_coding|1/6|c.1063C>T|p.Leu355Phe|1168/2554|1063/2103|355/700||
chr01	2582633	C	A	20525.7	0/0	0/0	1/1	0/0	0/0	1/1	1/1	1/1	0/0	1/1	0/0	1/1	1/1	1/1	0/0	0/0	0/0	0/0	0/0	1/1	0/0	0/0	0/0	0/0	A|missense_variant|MODERATE|OS01G0147700|OS01G0147700|transcript|OS01T0147700-01|protein_coding|1/6|c.838G>T|p.Val280Phe|943/2554|838/2103|280/700||
chr01	2582646	G	T	22856.6	0/0	0/0	1|1	0/0	0/0	1|1	1|1	1|1	0/0	1|1	0/0	1|1	1|1	1|1	0/0	0/0	0/0	0/0	0/0	1|1	0/0	0/0	0/0	0/0	T|missense_variant|MODERATE|OS01G0147700|OS01G0147700|transcript|OS01T0147700-01|protein_coding|1/6|c.825C>A|p.Asp275Glu|930/2554|825/2103|275/700||
chr01	2582655	A	C	22760	0/0	0/0	1|1	0/0	0/0	1|1	1|1	1|1	0/0	1|1	0/0	1|1	1|1	1|1	0/0	0/0	0/0	0/0	0/0	1|1	0/0	0/0	0/0	0/0	C|missense_variant|MODERATE|OS01G0147700|OS01G0147700|transcript|OS01T0147700-01|protein_coding|1/6|c.816T>G|p.Asp272Glu|921/2554|816/2103|272/700||
chr01	2582941	C	T	33988.9	0/0	.	1/1	.	0/0	1/1	1/1	1/1	.	1/1	0/0	1/1	1/1	1/1	0/0	0/0	.	.	.	1/1	0/0	.	.	.	T|missense_variant|MODERATE|OS01G0147700|OS01G0147700|transcript|OS01T0147700-01|protein_coding|1/6|c.530G>A|p.Arg177Gln|635/2554|530/2103|177/700||
chr01	2582955	G	GGCC	20177.5	0/0	0/0	1|1	0/0	0/0	./.	./.	1|1	0/0	1|1	0/0	1|1	1|1	./.	0/0	0/0	0/0	0/0	0/0	./.	0/0	0/0	0/0	0/0	GGCC|disruptive_inframe_insertion|MODERATE|OS01G0147700|OS01G0147700|transcript|OS01T0147700-01|protein_coding|1/6|c.513_515dupGGC|p.Ala172dup|620/2554|515/2103|172/700||
chr01	2582989	T	C	19527.4	0/0	0/0	1/1	0/0	0/0	./.	./.	1/1	0/0	1/1	0/0	1/1	1/1	./.	0/0	0/0	0/0	0/0	0/0	./.	0/0	0/0	0/0	0/0	C|missense_variant|MODERATE|OS01G0147700|OS01G0147700|transcript|OS01T0147700-01|protein_coding|1/6|c.482A>G|p.Asp161Gly|587/2554|482/2103|161/700||,C|downstream_gene_variant|MODIFIER|OS01G0147800|OS01G0147800|transcript|OS01T0147800-01|protein_coding||c.*2343A>G|||||1997|WARNING_TRANSCRIPT_NO_START_CODON
chr01	2583023	C	T	22328.4	0/0	0/0	1|1	0/0	0/0	.	.	1|1	0/0	1|1	0/0	1|1	1|1	.	0/0	0/0	0/0	0/0	0/0	.	0/0	0/0	0/0	0/0	T|missense_variant|MODERATE|OS01G0147700|OS01G0147700|transcript|OS01T0147700-01|protein_coding|1/6|c.448G>A|p.Ala150Thr|553/2554|448/2103|150/700||,T|downstream_gene_variant|MODIFIER|OS01G0147800|OS01G0147800|transcript|OS01T0147800-01|protein_coding||c.*2309G>A|||||1963|WARNING_TRANSCRIPT_NO_START_CODON
chr01	2583040	A	C	31396.9	0/0	.	1/1	.	0/0	1/1	1/1	1/1	.	1/1	0/0	1/1	1/1	1/1	0/0	0/0	.	.	.	1/1	0/0	.	.	.	C|missense_variant|MODERATE|OS01G0147700|OS01G0147700|transcript|OS01T0147700-01|protein_coding|1/6|c.431T>G|p.Ile144Ser|536/2554|431/2103|144/700||,C|downstream_gene_variant|MODIFIER|OS01G0147800|OS01G0147800|transcript|OS01T0147800-01|protein_coding||c.*2292T>G|||||1946|WARNING_TRANSCRIPT_NO_START_CODON
chr01	2583461	A	C	19681.5	0/0	0/0	1/1	0/0	0/0	1/1	1/1	1/1	0/0	1/1	0/0	1/1	1/1	1/1	0/0	0/0	0/0	0/0	0/0	1/1	0/0	0/0	0/0	0/0	C|missense_variant|MODERATE|OS01G0147700|OS01G0147700|transcript|OS01T0147700-01|protein_coding|1/6|c.10T>G|p.Tyr4Asp|115/2554|10/2103|4/700||,C|upstream_gene_variant|MODIFIER|OS01G0147850|OS01G0147850|transcript|OS01T0147850-00|protein_coding||c.-1835A>C|||||1833|WARNING_TRANSCRIPT_INCOMPLETE,C|downstream_gene_variant|MODIFIER|OS01G0147800|OS01G0147800|transcript|OS01T0147800-01|protein_coding||…
chr01	2585317	C	CAG	24933.6	0/0	0/0	1/1	0/0	0/0	1/1	1/1	1/1	0/0	1/1	0/0	1/1	1/1	1/1	0/0	0/0	0/0	0/0	0/0	1/1	0/0	0/0	0/0	0/0	CAG|frameshift_variant|HIGH|OS01G0147850|OS01G0147850|transcript|OS01T0147850-00|protein_coding|1/1|c.25_26dupAG|p.Phe10fs|29/375|27/373|9/123||WARNING_TRANSCRIPT_INCOMPLETE&INFO_REALIGN_3_PRIME,CAG|3_prime_UTR_variant|MODIFIER|OS01G0147800|OS01G0147800|transcript|OS01T0147800-01|protein_coding|7/7|c.*13_*14dupCT|||||14|WARNING_TRANSCRIPT_NO_START_CODON,CAG|upstream_gene_variant|MODIFIER|OS01G014…
chr01	2585411	G	C	21138.6	0/0	0/0	1|1	0/0	0/0	1|1	1|1	1|1	0/0	1|1	0/0	1|1	1|1	1|1	0/0	0/0	0/0	0/0	0/0	1|1	0/0	0/0	0/0	0/0	C|missense_variant|MODERATE|OS01G0147800|OS01G0147800|transcript|OS01T0147800-01|protein_coding|7/7|c.1334C>G|p.Ala445Gly|1371/1796|1334/1413|445/470||WARNING_TRANSCRIPT_NO_START_CODON,C|missense_variant|MODERATE|OS01G0147850|OS01G0147850|transcript|OS01T0147850-00|protein_coding|1/1|c.116G>C|p.Gly39Ala|118/375|116/373|39/123||WARNING_TRANSCRIPT_INCOMPLETE,C|upstream_gene_variant|MODIFIER|OS01G01…
chr01	2585418	A	C	20928.6	0/0	0/0	1|1	0/0	0/0	1|1	1|1	1|1	0/0	1|1	0/0	1|1	1|1	1|1	0/0	0/0	0/0	0/0	0/0	1|1	0/0	0/0	0/0	0/0	C|missense_variant|MODERATE|OS01G0147800|OS01G0147800|transcript|OS01T0147800-01|protein_coding|7/7|c.1327T>G|p.Ser443Ala|1364/1796|1327/1413|443/470||WARNING_TRANSCRIPT_NO_START_CODON,C|synonymous_variant|LOW|OS01G0147850|OS01G0147850|transcript|OS01T0147850-00|protein_coding|1/1|c.123A>C|p.Gly41Gly|125/375|123/373|41/123||WARNING_TRANSCRIPT_INCOMPLETE,C|upstream_gene_variant|MODIFIER|OS01G01477…
chr01	2585610	C	A	24732.6	0/0	0/0	1/1	0/0	0/0	1/1	1/1	1/1	0/0	1/1	0/0	1/1	1/1	1/1	0/0	0/0	0/0	0/0	0/0	1/1	0/0	0/0	0/0	0/0	A|missense_variant|MODERATE|OS01G0147800|OS01G0147800|transcript|OS01T0147800-01|protein_coding|7/7|c.1135G>T|p.Val379Leu|1172/1796|1135/1413|379/470||WARNING_TRANSCRIPT_NO_START_CODON,A|missense_variant|MODERATE|OS01G0147850|OS01G0147850|transcript|OS01T0147850-00|protein_coding|1/1|c.315C>A|p.His105Gln|317/375|315/373|105/123||WARNING_TRANSCRIPT_INCOMPLETE,A|upstream_gene_variant|MODIFIER|EPlOS…
chr01	2586754	T	C	21086.6	0/0	0/0	1/1	0/0	0/0	1/1	1/1	1/1	0/0	1/1	0/0	1/1	1/1	1/1	0/0	0/0	0/0	0/0	0/0	1/1	0/0	0/0	0/0	0/0	C|missense_variant|MODERATE|OS01G0147800|OS01G0147800|transcript|OS01T0147800-01|protein_coding|2/7|c.481A>G|p.Asn161Asp|518/1796|481/1413|161/470||WARNING_TRANSCRIPT_NO_START_CODON,C|upstream_gene_variant|MODIFIER|EPlOSAG00000018278|EPlOSAG00000018278|transcript|EPlOSAT00000019666|lincRNA||n.-289T>C|||||289|,C|upstream_gene_variant|MODIFIER|EPlOSAG00000015906|EPlOSAG00000015906|transcript|EPlOSA…
chr01	2591201	A	C	23081.6	0/0	0/0	1/1	0/0	0/0	1/1	1|1	1|1	0/0	1|1	0/0	1/1	1/1	1|1	0/0	0/0	0/0	0/0	0/0	1/1	0/0	0/0	0/0	0/0	C|missense_variant|MODERATE|TPI|OS01G0147900|transcript|OS01T0147900-01|protein_coding|5/9|c.454T>G|p.Ser152Ala|505/1052|454/762|152/253||,C|splice_region_variant&non_coding_transcript_exon_variant|LOW|OS01G0147950|OS01G0147950|transcript|OS01T0147950-00|lincRNA|4/8|n.483A>C||||||
chr01	2609865	A	T	21818.6	0/0	0/0	1/1	0/0	0/0	1/1	1/1	1/1	0/0	1/1	0/0	1/1	1/1	1/1	0/0	0/0	0/0	0/0	0/0	1/1	0/0	0/0	0/0	0/0	T|missense_variant|MODERATE|OS01G0148050|OS01G0148050|transcript|OS01T0148050-01|protein_coding|7/14|c.2156A>T|p.Glu719Val|2157/3219|2156/2874|719/957||WARNING_TRANSCRIPT_NO_START_CODON
chr01	2615236	C	T	22161.6	0/0	0/0	1/1	0/0	0/0	1/1	1/1	1/1	0/0	1/1	0/0	1/1	1/1	1/1	0/0	0/0	0/0	0/0	0/0	1/1	0/0	0/0	0/0	0/0	T|missense_variant&splice_region_variant|MODERATE|OS01G0148100|OS01G0148100|transcript|OS01T0148100-01|protein_coding|8/10|c.871G>A|p.Val291Ile|1109/2264|871/1149|291/382||,T|upstream_gene_variant|MODIFIER|EPlOSAG00000035040|EPlOSAG00000035040|transcript|EPlOSAT00000036428|lincRNA||n.-1103C>T|||||1103|,T|downstream_gene_variant|MODIFIER|EPlOSAG00000038394|EPlOSAG00000038394|transcript|EPlOSAT0000…
chr01	2636601	A	C	22749.6	0/0	0/0	1/1	0/0	0/0	1/1	1/1	1/1	0/0	1/1	0/0	1/1	1/1	1/1	0/0	0/0	0/0	0/0	0/0	1/1	0/0	0/0	0/0	0/0	C|missense_variant|MODERATE|OS01G0148400|OS01G0148400|transcript|OS01T0148400-01|protein_coding|9/11|c.1227A>C|p.Arg409Ser|1246/2281|1227/1881|409/626||
chr01	2636773	A	G	21599.6	0/0	0/0	1/1	0/0	0/0	1/1	1/1	1/1	0/0	1/1	0/0	1/1	1/1	1/1	0/0	0/0	0/0	0/0	0/0	1/1	0/0	0/0	0/0	0/0	G|missense_variant|MODERATE|OS01G0148400|OS01G0148400|transcript|OS01T0148400-01|protein_coding|9/11|c.1399A>G|p.Lys467Glu|1418/2281|1399/1881|467/626||
chr01	2636957	ACAG	A	23921.6	0/0	0/0	1/1	0/0	0/0	1/1	1/1	1/1	0/0	1/1	0/0	1/1	1/1	1/1	0/0	0/0	0/0	0/0	0/0	1/1	0/0	0/0	0/0	0/0	A|disruptive_inframe_deletion|MODERATE|OS01G0148400|OS01G0148400|transcript|OS01T0148400-01|protein_coding|9/11|c.1584_1586delCAG|p.Asn528_Arg529delinsLys|1603/2281|1584/1881|528/626||
chr01	2637005	C	A	22101.6	0/0	0/0	1/1	0/0	0/0	1/1	1/1	1/1	0/0	1/1	0/0	1/1	1/1	1/1	0/0	0/0	0/0	0/0	0/0	1/1	0/0	0/0	0/0	0/0	A|stop_gained|HIGH|OS01G0148400|OS01G0148400|transcript|OS01T0148400-01|protein_coding|9/11|c.1631C>A|p.Ser544*|1650/2281|1631/1881|544/626||
chr01	2643523	T	C	24031.6	0/0	0/0	1/1	0/0	0/0	1/1	1/1	1/1	0/0	1/1	0/0	1/1	1/1	1/1	0/0	0/0	0/0	0/0	0/0	1/1	0/0	0/0	0/0	0/0	C|missense_variant|MODERATE|OS01G0148500|OS01G0148500|transcript|OS01T0148500-01|protein_coding|1/2|c.1085A>G|p.Tyr362Cys|1143/1540|1085/1200|362/399||
chr01	2643571	C	A	23130.6	0/0	0/0	1/1	0/0	0/0	1/1	1/1	1/1	0/0	1/1	0/0	1/1	1/1	1/1	0/0	0/0	0/0	0/0	0/0	1/1	0/0	0/0	0/0	0/0	A|missense_variant|MODERATE|OS01G0148500|OS01G0148500|transcript|OS01T0148500-01|protein_coding|1/2|c.1037G>T|p.Arg346Leu|1095/1540|1037/1200|346/399||
chr01	2643781	A	G	22055.6	0/0	0/0	1/1	0/0	0/0	1/1	1/1	1/1	0/0	1/1	0/0	1/1	1/1	1/1	0/0	0/0	0/0	0/0	0/0	1/1	0/0	0/0	0/0	0/0	G|missense_variant|MODERATE|OS01G0148500|OS01G0148500|transcript|OS01T0148500-01|protein_coding|1/2|c.827T>C|p.Ile276Thr|885/1540|827/1200|276/399||
chr01	2643992	A	T	22219.6	0/0	0/0	1/1	0/0	0/0	1/1	1/1	1/1	0/0	1/1	0/0	1/1	1/1	1/1	0/0	0/0	0/0	0/0	0/0	1/1	0/0	0/0	0/0	0/0	T|missense_variant|MODERATE|OS01G0148500|OS01G0148500|transcript|OS01T0148500-01|protein_coding|1/2|c.616T>A|p.Leu206Met|674/1540|616/1200|206/399||
chr01	2652880	T	TCGG	18623.6	0/0	0/0	1/1	0/0	0/0	1/1	1/1	1/1	0/0	1/1	0/0	1/1	1/1	1/1	0/0	0/0	0/0	0/0	0/0	1/1	0/0	0/0	0/0	0/0	TCGG|disruptive_inframe_insertion|MODERATE|OS01G0148700|OS01G0148700|transcript|OS01T0148700-01|protein_coding|1/2|c.203_205dupGCG|p.Gly68dup|257/1478|206/1158|69/385||INFO_REALIGN_3_PRIME,TCGG|disruptive_inframe_insertion|MODERATE|OS01G0148700|OS01G0148700|transcript|OS01T0148700-02|protein_coding|1/2|c.203_205dupGCG|p.Gly68dup|219/1399|206/1158|69/385||INFO_REALIGN_3_PRIME
chr01	2653222	A	G	21540.6	0/0	0/0	1/1	0/0	0/0	1/1	1/1	1/1	0/0	1/1	0/0	1/1	1/1	1/1	0/0	0/0	0/0	0/0	0/0	1/1	0/0	0/0	0/0	0/0	G|missense_variant|MODERATE|OS01G0148700|OS01G0148700|transcript|OS01T0148700-01|protein_coding|1/2|c.524A>G|p.His175Arg|575/1478|524/1158|175/385||,G|missense_variant|MODERATE|OS01G0148700|OS01G0148700|transcript|OS01T0148700-02|protein_coding|1/2|c.524A>G|p.His175Arg|537/1399|524/1158|175/385||
chr01	2667393	C	T	448.61	0/0	0/0	1/1	0/0	0/0	./.	./.	1/1	0/0	1/1	0/0	1/1	./.	./.	0/0	0/0	0/0	0/0	0/0	./.	0/0	0/0	0/0	0/0	T|missense_variant|MODERATE|OS01G0149200|OS01G0149200|transcript|OS01T0149200-01|protein_coding|1/1|c.146G>A|p.Arg49Lys|1575/3883|146/432|49/143||,T|downstream_gene_variant|MODIFIER|OS01G0149350|OS01G0149350|transcript|OS01T0149350-00|protein_coding||c.*2559G>A|||||1858|
chr01	2670470	G	A	23204.6	0/0	0/0	1/1	0/0	0/0	1/1	1/1	1/1	0/0	1/1	0/0	1/1	1/1	1/1	0/0	0/0	0/0	0/0	0/0	1/1	0/0	0/0	0/0	0/0	A|missense_variant|MODERATE|OS01G0149350|OS01G0149350|transcript|OS01T0149350-00|protein_coding|3/4|c.2455C>T|p.His819Tyr|3405/4464|2455/2973|819/990||,A|upstream_gene_variant|MODIFIER|OS01G0149200|OS01G0149200|transcript|OS01T0149200-01|protein_coding||c.-2932C>T|||||1503|,A|non_coding_transcript_exon_variant|MODIFIER|EPlOSAG00000003824|EPlOSAG00000003824|transcript|EPlOSAT00000005212|lincRNA|1/…
chr01	2671118	T	A	22457.6	0/0	0/0	1/1	0/0	0/0	1/1	1/1	1/1	0/0	1/1	0/0	1/1	1/1	1/1	0/0	0/0	0/0	0/0	0/0	1/1	0/0	0/0	0/0	0/0	A|missense_variant|MODERATE|OS01G0149350|OS01G0149350|transcript|OS01T0149350-00|protein_coding|3/4|c.1807A>T|p.Ser603Cys|2757/4464|1807/2973|603/990||,A|upstream_gene_variant|MODIFIER|EPlOSAG00000003824|EPlOSAG00000003824|transcript|EPlOSAT00000005212|lincRNA||n.-593A>T|||||593|
chr01	2671305	A	C	23514.6	0/0	0/0	1/1	0/0	0/0	1/1	1/1	1/1	0/0	1/1	0/0	1/1	1/1	1/1	0/0	0/0	0/0	0/0	0/0	1/1	0/0	0/0	0/0	0/0	C|missense_variant|MODERATE|OS01G0149350|OS01G0149350|transcript|OS01T0149350-00|protein_coding|3/4|c.1620T>G|p.Asn540Lys|2570/4464|1620/2973|540/990||,C|upstream_gene_variant|MODIFIER|EPlOSAG00000003824|EPlOSAG00000003824|transcript|EPlOSAT00000005212|lincRNA||n.-780T>G|||||780|
chr01	2671403	T	C	22616.6	0/0	0/0	1/1	0/0	0/0	1/1	1/1	1/1	0/0	1/1	0/0	1/1	1/1	1/1	0/0	0/0	0/0	0/0	0/0	1/1	0/0	0/0	0/0	0/0	C|missense_variant|MODERATE|OS01G0149350|OS01G0149350|transcript|OS01T0149350-00|protein_coding|3/4|c.1522A>G|p.Thr508Ala|2472/4464|1522/2973|508/990||,C|upstream_gene_variant|MODIFIER|EPlOSAG00000003824|EPlOSAG00000003824|transcript|EPlOSAT00000005212|lincRNA||n.-878A>G|||||878|
chr01	2671530	C	A	19821.6	0/0	0/0	1/1	0/0	0/0	1/1	1/1	1/1	0/0	1/1	0/0	1/1	1/1	1/1	0/0	0/0	0/0	0/0	0/0	1/1	0/0	0/0	0/0	0/0	A|missense_variant|MODERATE|OS01G0149350|OS01G0149350|transcript|OS01T0149350-00|protein_coding|3/4|c.1395G>T|p.Met465Ile|2345/4464|1395/2973|465/990||,A|upstream_gene_variant|MODIFIER|EPlOSAG00000003824|EPlOSAG00000003824|transcript|EPlOSAT00000005212|lincRNA||n.-1005G>T|||||1005|
chr01	2671681	A	C	18509.6	0/0	0/0	1/1	0/0	0/0	1/1	1/1	1/1	0/0	1/1	0/0	1/1	1/1	1/1	0/0	0/0	0/0	0/0	0/0	1/1	0/0	0/0	0/0	0/0	C|missense_variant|MODERATE|OS01G0149350|OS01G0149350|transcript|OS01T0149350-00|protein_coding|3/4|c.1244T>G|p.Phe415Cys|2194/4464|1244/2973|415/990||,C|upstream_gene_variant|MODIFIER|EPlOSAG00000003824|EPlOSAG00000003824|transcript|EPlOSAT00000005212|lincRNA||n.-1156T>G|||||1156|
chr01	2672008	A	T	18492.6	0/0	0/0	1/1	0/0	0/0	1/1	1/1	1/1	0/0	1/1	0/0	1/1	1/1	1/1	0/0	0/0	0/0	0/0	0/0	1/1	0/0	0/0	0/0	0/0	T|missense_variant|MODERATE|OS01G0149350|OS01G0149350|transcript|OS01T0149350-00|protein_coding|3/4|c.917T>A|p.Leu306Gln|1867/4464|917/2973|306/990||,T|upstream_gene_variant|MODIFIER|EPlOSAG00000003824|EPlOSAG00000003824|transcript|EPlOSAT00000005212|lincRNA||n.-1483T>A|||||1483|
chr01	2690861	A	G	6192.91	0/0	0/0	1/1	0/0	0/0	1/1	1|1	1|1	0/0	1|1	0/0	./.	1|1	1|1	0/0	0/0	0/0	0/0	0/0	1/1	0/0	0/0	0/0	0/0	G|missense_variant|MODERATE|OS01G0149700|OS01G0149700|transcript|OS01T0149700-00|protein_coding|1/2|c.1082T>C|p.Leu361Ser|1164/3403|1082/1119|361/372||,G|5_prime_UTR_variant|MODIFIER|OS01G0149750|OS01G0149750|transcript|OS01T0149750-00|protein_coding|2/2|c.-663A>G|||||663|WARNING_TRANSCRIPT_NO_STOP_CODON
chr01	2690868	CT	C	5948.59	0/0	0/0	./.	0/0	0/0	./.	1|1	1|1	0/0	1|1	0/0	./.	1|1	1|1	0/0	0/0	0/0	0/0	0/0	./.	0/0	0/0	0/0	0/0	C|frameshift_variant|HIGH|OS01G0149700|OS01G0149700|transcript|OS01T0149700-00|protein_coding|1/2|c.1074delA|p.Gly359fs|1156/3403|1074/1119|358/372||,C|5_prime_UTR_variant|MODIFIER|OS01G0149750|OS01G0149750|transcript|OS01T0149750-00|protein_coding|2/2|c.-654delT|||||654|WARNING_TRANSCRIPT_NO_STOP_CODON&INFO_REALIGN_3_PRIME
chr01	2690885	G	A	7650.4	0/0	0/0	1/1	0/0	0/0	./.	1|1	1|1	0/0	1|1	0/0	1/1	1|1	1|1	0/0	0/0	0/0	0/0	0/0	./.	0/0	0/0	0/0	0/0	A|missense_variant|MODERATE|OS01G0149700|OS01G0149700|transcript|OS01T0149700-00|protein_coding|1/2|c.1058C>T|p.Ser353Leu|1140/3403|1058/1119|353/372||,A|5_prime_UTR_variant|MODIFIER|OS01G0149750|OS01G0149750|transcript|OS01T0149750-00|protein_coding|2/2|c.-639G>A|||||639|WARNING_TRANSCRIPT_NO_STOP_CODON
chr01	2690913	T	C	11810.6	0/0	0/0	1/1	0/0	0/0	1/1	1/1	1/1	0/0	1/1	0/0	1/1	1/1	1/1	0/0	0/0	0/0	0/0	0/0	1/1	0/0	0/0	0/0	0/0	C|missense_variant|MODERATE|OS01G0149700|OS01G0149700|transcript|OS01T0149700-00|protein_coding|1/2|c.1030A>G|p.Lys344Glu|1112/3403|1030/1119|344/372||,C|5_prime_UTR_variant|MODIFIER|OS01G0149750|OS01G0149750|transcript|OS01T0149750-00|protein_coding|2/2|c.-611T>C|||||611|WARNING_TRANSCRIPT_NO_STOP_CODON,C|upstream_gene_variant|MODIFIER|EPlOSAG00000020408|EPlOSAG00000020408|transcript|EPlOSAT0000…
chr01	2690942	G	GA	13434.6	0/0	0/0	1/1	0/0	0/0	1/1	1/1	1/1	0/0	1/1	0/0	1/1	1/1	1/1	0/0	0/0	0/0	0/0	0/0	1/1	0/0	0/0	0/0	0/0	GA|frameshift_variant|HIGH|OS01G0149700|OS01G0149700|transcript|OS01T0149700-00|protein_coding|1/2|c.1000_1001insT|p.Pro334fs|1082/3403|1000/1119|334/372||,GA|5_prime_UTR_variant|MODIFIER|OS01G0149750|OS01G0149750|transcript|OS01T0149750-00|protein_coding|2/2|c.-582_-581insA|||||581|WARNING_TRANSCRIPT_NO_STOP_CODON,GA|upstream_gene_variant|MODIFIER|EPlOSAG00000020408|EPlOSAG00000020408|transcript…
chr01	2691008	T	G	22585.6	0/0	0/0	1|1	0/0	0/0	1|1	1|1	1|1	0/0	1|1	0/0	1|1	1|1	1|1	0/0	0/0	0/0	0/0	0/0	1|1	0/0	0/0	0/0	0/0	G|missense_variant|MODERATE|OS01G0149700|OS01G0149700|transcript|OS01T0149700-00|protein_coding|1/2|c.935A>C|p.Tyr312Ser|1017/3403|935/1119|312/372||,G|5_prime_UTR_variant|MODIFIER|OS01G0149750|OS01G0149750|transcript|OS01T0149750-00|protein_coding|2/2|c.-516T>G|||||516|WARNING_TRANSCRIPT_NO_STOP_CODON,G|upstream_gene_variant|MODIFIER|EPlOSAG00000020408|EPlOSAG00000020408|transcript|EPlOSAT000000…
chr01	2691098	GAAT	G	22873.6	0/0	0/0	1/1	0/0	0/0	1/1	1/1	1/1	0/0	1/1	0/0	1/1	1/1	1/1	0/0	0/0	0/0	0/0	0/0	1/1	0/0	0/0	0/0	0/0	G|disruptive_inframe_deletion|MODERATE|OS01G0149700|OS01G0149700|transcript|OS01T0149700-00|protein_coding|1/2|c.842_844delATT|p.His281_Ser282delinsPro|926/3403|842/1119|281/372||,G|5_prime_UTR_variant|MODIFIER|OS01G0149750|OS01G0149750|transcript|OS01T0149750-00|protein_coding|2/2|c.-425_-423delAAT|||||423|WARNING_TRANSCRIPT_NO_STOP_CODON,G|upstream_gene_variant|MODIFIER|EPlOSAG00000020408|EPlOS…
chr01	2691222	T	C	25642.6	0/0	0/0	1/1	0/0	0/0	1/1	1/1	1/1	0/0	1/1	0/0	1/1	1/1	1/1	0/0	0/0	0/0	0/0	0/0	1/1	0/0	0/0	0/0	0/0	C|missense_variant|MODERATE|OS01G0149700|OS01G0149700|transcript|OS01T0149700-00|protein_coding|1/2|c.721A>G|p.Met241Val|803/3403|721/1119|241/372||,C|5_prime_UTR_variant|MODIFIER|OS01G0149750|OS01G0149750|transcript|OS01T0149750-00|protein_coding|2/2|c.-302T>C|||||302|WARNING_TRANSCRIPT_NO_STOP_CODON,C|upstream_gene_variant|MODIFIER|EPlOSAG00000020408|EPlOSAG00000020408|transcript|EPlOSAT0000002…
chr01	2691249	G	T	28329.6	0/0	0/0	1|1	0/0	0/0	1|1	1|1	1|1	0/0	1|1	0/0	1|1	1|1	1|1	0/0	0/0	0/0	0/0	0/0	1|1	0/0	0/0	0/0	0/0	T|missense_variant|MODERATE|OS01G0149700|OS01G0149700|transcript|OS01T0149700-00|protein_coding|1/2|c.694C>A|p.Leu232Ile|776/3403|694/1119|232/372||,T|5_prime_UTR_variant|MODIFIER|OS01G0149750|OS01G0149750|transcript|OS01T0149750-00|protein_coding|2/2|c.-275G>T|||||275|WARNING_TRANSCRIPT_NO_STOP_CODON,T|upstream_gene_variant|MODIFIER|EPlOSAG00000020408|EPlOSAG00000020408|transcript|EPlOSAT0000002…
chr01	2691261	C	CGGA	29325.6	0/0	0/0	1|1	0/0	0/0	1|1	1|1	1|1	0/0	1|1	0/0	1|1	1|1	1|1	0/0	0/0	0/0	0/0	0/0	1|1	0/0	0/0	0/0	0/0	CGGA|conservative_inframe_insertion|MODERATE|OS01G0149700|OS01G0149700|transcript|OS01T0149700-00|protein_coding|1/2|c.679_681dupTCC|p.Ser227dup|763/3403|681/1119|227/372||,CGGA|5_prime_UTR_variant|MODIFIER|OS01G0149750|OS01G0149750|transcript|OS01T0149750-00|protein_coding|2/2|c.-262_-260dupGGA|||||259|WARNING_TRANSCRIPT_NO_STOP_CODON&INFO_REALIGN_3_PRIME,CGGA|upstream_gene_variant|MODIFIER|EPlO…
chr01	2691402	T	C	25577.6	0/0	0/0	1|1	0/0	0/0	1|1	1|1	1|1	0/0	1|1	0/0	1|1	1|1	1|1	0/0	0/0	0/0	0/0	0/0	1|1	0/0	0/0	0/0	0/0	C|missense_variant|MODERATE|OS01G0149700|OS01G0149700|transcript|OS01T0149700-00|protein_coding|1/2|c.541A>G|p.Lys181Glu|623/3403|541/1119|181/372||,C|5_prime_UTR_variant|MODIFIER|OS01G0149750|OS01G0149750|transcript|OS01T0149750-00|protein_coding|2/2|c.-122T>C|||||122|WARNING_TRANSCRIPT_NO_STOP_CODON,C|upstream_gene_variant|MODIFIER|EPlOSAG00000020408|EPlOSAG00000020408|transcript|EPlOSAT0000002…
chr01	2691438	T	C	24530.6	0/0	0/0	1|1	0/0	0/0	1|1	1|1	1|1	0/0	1|1	0/0	1|1	1|1	1|1	0/0	0/0	0/0	0/0	0/0	1|1	0/0	0/0	0/0	0/0	C|missense_variant|MODERATE|OS01G0149700|OS01G0149700|transcript|OS01T0149700-00|protein_coding|1/2|c.505A>G|p.Lys169Glu|587/3403|505/1119|169/372||,C|5_prime_UTR_variant|MODIFIER|OS01G0149750|OS01G0149750|transcript|OS01T0149750-00|protein_coding|2/2|c.-86T>C|||||86|WARNING_TRANSCRIPT_NO_STOP_CODON,C|upstream_gene_variant|MODIFIER|EPlOSAG00000020408|EPlOSAG00000020408|transcript|EPlOSAT000000217…
chr01	2691542	G	GCAGGGAGC	28651.6	0/0	0/0	1|1	0/0	0/0	1|1	1|1	1|1	0/0	1|1	0/0	1|1	1|1	1|1	0/0	0/0	0/0	0/0	0/0	1|1	0/0	0/0	0/0	0/0	GCAGGGAGC|frameshift_variant|HIGH|OS01G0149700|OS01G0149700|transcript|OS01T0149700-00|protein_coding|1/2|c.400_401insGCTCCCTG|p.Ala134fs|482/3403|400/1119|134/372||,GCAGGGAGC|frameshift_variant|HIGH|OS01G0149750|OS01G0149750|transcript|OS01T0149750-00|protein_coding|2/2|c.25_26insGCCAGGGA|p.Ile9fs|2750/3162|26/438|9/145||WARNING_TRANSCRIPT_NO_STOP_CODON&INFO_REALIGN_3_PRIME,GCAGGGAGC|upstream_ge…
chr01	2691551	A	G	30042.6	0/0	0/0	1|1	0/0	0/0	1|1	1|1	1|1	0/0	1|1	0/0	1|1	1|1	1|1	0/0	0/0	0/0	0/0	0/0	1|1	0/0	0/0	0/0	0/0	G|missense_variant|MODERATE|OS01G0149700|OS01G0149700|transcript|OS01T0149700-00|protein_coding|1/2|c.392T>C|p.Val131Ala|474/3403|392/1119|131/372||,G|missense_variant|MODERATE|OS01G0149750|OS01G0149750|transcript|OS01T0149750-00|protein_coding|2/2|c.28A>G|p.Thr10Ala|2752/3162|28/438|10/145||WARNING_TRANSCRIPT_NO_STOP_CODON,G|upstream_gene_variant|MODIFIER|EPlOSAG00000020408|EPlOSAG00000020408|tr…
chr01	2691559	G	T	29885.6	0/0	0/0	1|1	0/0	0/0	1/1	1|1	1|1	0/0	1|1	0/0	1|1	1|1	1|1	0/0	0/0	0/0	0/0	0/0	1|1	0/0	0/0	0/0	0/0	T|missense_variant|MODERATE|OS01G0149750|OS01G0149750|transcript|OS01T0149750-00|protein_coding|2/2|c.36G>T|p.Glu12Asp|2760/3162|36/438|12/145||WARNING_TRANSCRIPT_NO_STOP_CODON,T|synonymous_variant|LOW|OS01G0149700|OS01G0149700|transcript|OS01T0149700-00|protein_coding|1/2|c.384C>A|p.Ile128Ile|466/3403|384/1119|128/372||,T|upstream_gene_variant|MODIFIER|EPlOSAG00000020408|EPlOSAG00000020408|trans…
chr01	2691561	T	A	30402.6	0/0	0/0	1|1	0/0	0/0	1/1	1|1	1|1	0/0	1|1	0/0	1|1	1|1	1|1	0/0	0/0	0/0	0/0	0/0	1|1	0/0	0/0	0/0	0/0	A|missense_variant|MODERATE|OS01G0149700|OS01G0149700|transcript|OS01T0149700-00|protein_coding|1/2|c.382A>T|p.Ile128Phe|464/3403|382/1119|128/372||,A|missense_variant|MODERATE|OS01G0149750|OS01G0149750|transcript|OS01T0149750-00|protein_coding|2/2|c.38T>A|p.Met13Lys|2762/3162|38/438|13/145||WARNING_TRANSCRIPT_NO_STOP_CODON,A|upstream_gene_variant|MODIFIER|EPlOSAG00000020408|EPlOSAG00000020408|tr…
chr01	2691577	A	G	29895.6	0/0	0/0	1|1	0/0	0/0	1|1	1|1	1|1	0/0	1|1	0/0	1|1	1|1	1|1	0/0	0/0	0/0	0/0	0/0	1|1	0/0	0/0	0/0	0/0	G|missense_variant|MODERATE|OS01G0149750|OS01G0149750|transcript|OS01T0149750-00|protein_coding|2/2|c.54A>G|p.Ile18Met|2778/3162|54/438|18/145||WARNING_TRANSCRIPT_NO_STOP_CODON,G|synonymous_variant|LOW|OS01G0149700|OS01G0149700|transcript|OS01T0149700-00|protein_coding|1/2|c.366T>C|p.Asp122Asp|448/3403|366/1119|122/372||,G|upstream_gene_variant|MODIFIER|EPlOSAG00000020408|EPlOSAG00000020408|trans…
chr01	2691681	C	T	28338.6	0/0	0/0	1|1	0/0	0/0	1|1	1|1	1|1	0/0	1|1	0/0	1|1	1|1	1|1	0/0	0/0	0/0	0/0	0/0	1|1	0/0	0/0	0/0	0/0	T|missense_variant|MODERATE|OS01G0149700|OS01G0149700|transcript|OS01T0149700-00|protein_coding|1/2|c.262G>A|p.Val88Ile|344/3403|262/1119|88/372||,T|missense_variant|MODERATE|OS01G0149750|OS01G0149750|transcript|OS01T0149750-00|protein_coding|2/2|c.158C>T|p.Thr53Met|2882/3162|158/438|53/145||WARNING_TRANSCRIPT_NO_STOP_CODON,T|upstream_gene_variant|MODIFIER|EPlOSAG00000020408|EPlOSAG00000020408|tr…
chr01	2691692	A	G	27588.6	0/0	0/0	1|1	0/0	0/0	1|1	1|1	1|1	0/0	1|1	0/0	1|1	1|1	1|1	0/0	0/0	0/0	0/0	0/0	1|1	0/0	0/0	0/0	0/0	G|missense_variant|MODERATE|OS01G0149700|OS01G0149700|transcript|OS01T0149700-00|protein_coding|1/2|c.251T>C|p.Leu84Pro|333/3403|251/1119|84/372||,G|missense_variant|MODERATE|OS01G0149750|OS01G0149750|transcript|OS01T0149750-00|protein_coding|2/2|c.169A>G|p.Ser57Gly|2893/3162|169/438|57/145||WARNING_TRANSCRIPT_NO_STOP_CODON,G|upstream_gene_variant|MODIFIER|EPlOSAG00000020408|EPlOSAG00000020408|tr…
chr01	2691752	T	C	21297.6	0/0	0/0	1/1	0/0	0/0	1/1	1/1	1/1	0/0	1/1	0/0	1/1	1/1	1/1	0/0	0/0	0/0	0/0	0/0	1/1	0/0	0/0	0/0	0/0	C|missense_variant|MODERATE|OS01G0149700|OS01G0149700|transcript|OS01T0149700-00|protein_coding|1/2|c.191A>G|p.His64Arg|273/3403|191/1119|64/372||,C|missense_variant|MODERATE|OS01G0149750|OS01G0149750|transcript|OS01T0149750-00|protein_coding|2/2|c.229T>C|p.Trp77Arg|2953/3162|229/438|77/145||WARNING_TRANSCRIPT_NO_STOP_CODON,C|upstream_gene_variant|MODIFIER|EPlOSAG00000020408|EPlOSAG00000020408|tr…
chr01	2718107	A	G	22688.6	0/0	0/0	1|1	0/0	0/0	1|1	1|1	1|1	0/0	1|1	0/0	1|1	1|1	1|1	0/0	0/0	0/0	0/0	0/0	1|1	0/0	0/0	0/0	0/0	G|missense_variant|MODERATE|PAS2B|OS01G0150200|transcript|OS01T0150200-01|protein_coding|1/9|c.4A>G|p.Thr2Ala|272/1162|4/666|2/221||,G|missense_variant|MODERATE|PAS2B|OS01G0150200|transcript|OS01T0150200-02|protein_coding|1/9|c.4A>G|p.Thr2Ala|66/1083|4/666|2/221||,G|downstream_gene_variant|MODIFIER|OS01G0150100|OS01G0150100|transcript|OS01T0150100-01|protein_coding||c.*2946A>G|||||682|
chr01	2722839	C	T	20010.6	0/0	0/0	1/1	0/0	0/0	1/1	1/1	1/1	0/0	1/1	0/0	1/1	1/1	1/1	0/0	0/0	0/0	0/0	0/0	1/1	0/0	0/0	0/0	0/0	T|missense_variant|MODERATE|OS01G0150400|OS01G0150400|transcript|OS01T0150400-00|protein_coding|2/6|c.143C>T|p.Ser48Leu|143/636|143/636|48/211||,T|downstream_gene_variant|MODIFIER|PAS2B|OS01G0150200|transcript|OS01T0150200-01|protein_coding||c.*1991C>T|||||1763|,T|downstream_gene_variant|MODIFIER|PAS2B|OS01G0150200|transcript|OS01T0150200-02|protein_coding||c.*1991C>T|||||1636|
chr01	2728119	C	CG	22637.6	0/0	0/0	1|1	0/0	0/0	1|1	1|1	1|1	0/0	1|1	0/0	1|1	1|1	1|1	0/0	0/0	0/0	0/0	0/0	1|1	0/0	0/0	0/0	0/0	CG|frameshift_variant|HIGH|OS01G0150500|OS01G0150500|transcript|OS01T0150500-00|protein_coding|2/7|c.108_109insG|p.Ser37fs|109/666|109/666|37/221||,CG|downstream_gene_variant|MODIFIER|OS01G0150400|OS01G0150400|transcript|OS01T0150400-00|protein_coding||c.*1956_*1957insG|||||1957|
chr01	2728121	C	T	22637.6	0/0	0/0	1|1	0/0	0/0	1|1	1|1	1|1	0/0	1|1	0/0	1|1	1|1	1|1	0/0	0/0	0/0	0/0	0/0	1|1	0/0	0/0	0/0	0/0	T|missense_variant|MODERATE|OS01G0150500|OS01G0150500|transcript|OS01T0150500-00|protein_coding|2/7|c.110C>T|p.Ser37Phe|110/666|110/666|37/221||,T|downstream_gene_variant|MODIFIER|OS01G0150400|OS01G0150400|transcript|OS01T0150400-00|protein_coding||c.*1958C>T|||||1958|
chr01	2728493	C	T	21107.6	0/0	0/0	1/1	0/0	0/0	1/1	1/1	1/1	0/0	1/1	0/0	1/1	1/1	1/1	0/0	0/0	0/0	0/0	0/0	1/1	0/0	0/0	0/0	0/0	T|missense_variant|MODERATE|OS01G0150500|OS01G0150500|transcript|OS01T0150500-00|protein_coding|3/7|c.218C>T|p.Thr73Ile|218/666|218/666|73/221||
chr01	2730764	T	G	22886.6	0/0	0/0	1/1	0/0	0/0	1/1	1/1	1/1	0/0	1/1	0/0	1/1	1/1	1/1	0/0	0/0	0/0	0/0	0/0	1/1	0/0	0/0	0/0	0/0	G|missense_variant|MODERATE|OS01G0150500|OS01G0150500|transcript|OS01T0150500-00|protein_coding|6/7|c.552T>G|p.Phe184Leu|552/666|552/666|184/221||,G|downstream_gene_variant|MODIFIER|OS01G0150700|OS01G0150700|transcript|OS01T0150700-00|protein_coding||c.*5703A>C|||||632|WARNING_TRANSCRIPT_NO_START_CODON
chr01	2743020	G	T	23379.6	0/0	0/0	1/1	0/0	0/0	1/1	1/1	1/1	0/0	1/1	0/0	1/1	1/1	1/1	0/0	0/0	0/0	0/0	0/0	1/1	0/0	0/0	0/0	0/0	T|splice_acceptor_variant&intron_variant|HIGH|OS01G0150800|OS01G0150800|transcript|OS01T0150800-01|protein_coding|1/9|c.19-1G>T||||||,T|downstream_gene_variant|MODIFIER|EPlOSAG00000049111|EPlOSAG00000049111|transcript|EPlOSAT00000050499|lincRNA||n.*209G>T|||||209|
chr01	2743081	G	A	22062.6	0/0	0/0	1/1	0/0	0/0	1/1	1/1	1/1	0/0	1/1	0/0	1/1	1/1	1/1	0/0	0/0	0/0	0/0	0/0	1/1	0/0	0/0	0/0	0/0	A|missense_variant|MODERATE|OS01G0150800|OS01G0150800|transcript|OS01T0150800-01|protein_coding|2/10|c.79G>A|p.Gly27Arg|430/1264|79/678|27/225||,A|downstream_gene_variant|MODIFIER|EPlOSAG00000049111|EPlOSAG00000049111|transcript|EPlOSAT00000050499|lincRNA||n.*270G>A|||||270|
chr01	2745842	C	G	15796.6	0/0	0/0	1/1	0/0	0/0	1/1	1/1	1/1	0/0	1/1	0/0	1/1	1/1	1/1	0/0	0/0	0/0	0/0	0/0	1/1	0/0	0/0	0/0	0/0	G|missense_variant|MODERATE|OS01G0150800|OS01G0150800|transcript|OS01T0150800-01|protein_coding|5/10|c.260C>G|p.Ala87Gly|611/1264|260/678|87/225||,G|downstream_gene_variant|MODIFIER|EPlOSAG00000027540|EPlOSAG00000027540|transcript|EPlOSAT00000028928|lincRNA||n.*1809G>C|||||1809|
chr01	2746535	A	T	11764.6	0/0	0/0	1|1	0/0	0/0	1|1	1|1	1|1	0/0	1|1	0/0	1|1	1|1	1|1	0/0	0/0	0/0	0/0	0/0	1|1	0/0	0/0	0/0	0/0	T|missense_variant|MODERATE|OS01G0150800|OS01G0150800|transcript|OS01T0150800-01|protein_coding|7/10|c.376A>T|p.Asn126Tyr|727/1264|376/678|126/225||,T|downstream_gene_variant|MODIFIER|EPlOSAG00000027540|EPlOSAG00000027540|transcript|EPlOSAT00000028928|lincRNA||n.*1116T>A|||||1116|
chr01	2746542	TGAA	T	11389.6	0/0	0/0	1|1	0/0	0/0	1|1	1|1	1|1	0/0	1|1	0/0	1|1	1|1	1|1	0/0	0/0	0/0	0/0	0/0	1|1	0/0	0/0	0/0	0/0	T|conservative_inframe_deletion|MODERATE|OS01G0150800|OS01G0150800|transcript|OS01T0150800-01|protein_coding|7/10|c.385_387delAAG|p.Lys129del|736/1264|385/678|129/225||INFO_REALIGN_3_PRIME,T|downstream_gene_variant|MODIFIER|EPlOSAG00000027540|EPlOSAG00000027540|transcript|EPlOSAT00000028928|lincRNA||n.*1106_*1108delTTC|||||1108|
chr01	2746732	A	G	21518.6	0/0	0/0	1/1	0/0	0/0	1/1	1/1	1/1	0/0	1/1	0/0	1/1	1/1	1/1	0/0	0/0	0/0	0/0	0/0	1/1	0/0	0/0	0/0	0/0	G|missense_variant|MODERATE|OS01G0150800|OS01G0150800|transcript|OS01T0150800-01|protein_coding|8/10|c.457A>G|p.Ile153Val|808/1264|457/678|153/225||,G|downstream_gene_variant|MODIFIER|EPlOSAG00000027540|EPlOSAG00000027540|transcript|EPlOSAT00000028928|lincRNA||n.*919T>C|||||919|
chr01	2747140	C	T	21646.6	0/0	0/0	1/1	0/0	0/0	1/1	1/1	1/1	0/0	1/1	0/0	1/1	1/1	1/1	0/0	0/0	0/0	0/0	0/0	1/1	0/0	0/0	0/0	0/0	T|missense_variant|MODERATE|OS01G0150800|OS01G0150800|transcript|OS01T0150800-01|protein_coding|10/10|c.614C>T|p.Pro205Leu|965/1264|614/678|205/225||,T|downstream_gene_variant|MODIFIER|EPlOSAG00000027540|EPlOSAG00000027540|transcript|EPlOSAT00000028928|lincRNA||n.*511G>A|||||511|
chr01	2752164	G	T	21065.6	0/0	0/0	1/1	0/0	0/0	1/1	1/1	1/1	0/0	1/1	0/0	1/1	1/1	1/1	0/0	0/0	0/0	0/0	0/0	1/1	0/0	0/0	0/0	0/0	T|missense_variant|MODERATE|OS01G0150900|OS01G0150900|transcript|OS01T0150900-01|protein_coding|1/4|c.20G>T|p.Arg7Leu|21/492|20/252|7/83||WARNING_TRANSCRIPT_NO_START_CODON,T|upstream_gene_variant|MODIFIER|OS01G0150950|OS01G0150950|transcript|OS01T0150950-00|protein_coding||c.-2087G>T|||||1499|,T|downstream_gene_variant|MODIFIER|EPlOSAG00000049116|EPlOSAG00000049116|transcript|EPlOSAT00000050504|l…
chr01	2752239	G	A	19465.6	0/0	0/0	1/1	0/0	0/0	1/1	1/1	1/1	0/0	1/1	0/0	1/1	1/1	1/1	0/0	0/0	0/0	0/0	0/0	1/1	0/0	0/0	0/0	0/0	A|missense_variant|MODERATE|OS01G0150900|OS01G0150900|transcript|OS01T0150900-01|protein_coding|1/4|c.95G>A|p.Gly32Asp|96/492|95/252|32/83||WARNING_TRANSCRIPT_NO_START_CODON,A|upstream_gene_variant|MODIFIER|OS01G0150950|OS01G0150950|transcript|OS01T0150950-00|protein_coding||c.-2012G>A|||||1424|,A|downstream_gene_variant|MODIFIER|EPlOSAG00000049116|EPlOSAG00000049116|transcript|EPlOSAT00000050504…
chr01	2767592	C	T	24822.6	0/0	0/0	1/1	0/0	0/0	1/1	1/1	1/1	0/0	1/1	0/0	1/1	1/1	1/1	0/0	0/0	0/0	0/0	0/0	1/1	0/0	0/0	0/0	0/0	T|missense_variant|MODERATE|OS01G0151100|OS01G0151100|transcript|OS01T0151100-01|protein_coding|2/2|c.1076C>T|p.Ala359Val|1495/2505|1076/1644|359/547||
chr01	2767639	G	A	26345.6	0/0	0/0	1|1	0/0	0/0	1|1	1|1	1|1	0/0	1|1	0/0	1|1	1|1	1|1	0/0	0/0	0/0	0/0	0/0	1|1	0/0	0/0	0/0	0/0	A|missense_variant|MODERATE|OS01G0151100|OS01G0151100|transcript|OS01T0151100-01|protein_coding|2/2|c.1123G>A|p.Val375Met|1542/2505|1123/1644|375/547||
chr01	2767645	G	A	26542.6	0/0	0/0	1|1	0/0	0/0	1|1	1|1	1|1	0/0	1|1	0/0	1|1	1|1	1|1	0/0	0/0	0/0	0/0	0/0	1|1	0/0	0/0	0/0	0/0	A|missense_variant|MODERATE|OS01G0151100|OS01G0151100|transcript|OS01T0151100-01|protein_coding|2/2|c.1129G>A|p.Ala377Thr|1548/2505|1129/1644|377/547||
chr01	2770367	A	C	13699.6	0/0	0/0	1/1	0/0	0/0	1/1	1/1	1/1	0/0	1/1	0/0	1/1	1/1	1/1	0/0	0/0	0/0	0/0	0/0	1/1	0/0	0/0	0/0	0/0	C|missense_variant|MODERATE|OS01G0151200|OS01G0151200|transcript|OS01T0151200-01|protein_coding|1/12|c.73A>C|p.Met25Leu|226/1990|73/1380|25/459||,C|upstream_gene_variant|MODIFIER|OS01G0151200|OS01G0151200|transcript|OS01T0151200-02|protein_coding||c.-1199A>C|||||1197|WARNING_TRANSCRIPT_NO_START_CODON,C|downstream_gene_variant|MODIFIER|OS01G0151100|OS01G0151100|transcript|OS01T0151100-01|protein_c…
chr01	2770595	T	G	18077	0/0	0/0	1|1	0/0	0/0	1|1	1|1	1|1	0/0	1|1	0/0	1|1	1|1	1|1	0/0	0/0	0/0	0/0	0/0	1/1	0/0	0/0	0/0	0/0	G|missense_variant|MODERATE|OS01G0151200|OS01G0151200|transcript|OS01T0151200-01|protein_coding|1/12|c.301T>G|p.Ser101Ala|454/1990|301/1380|101/459||,G|upstream_gene_variant|MODIFIER|OS01G0151200|OS01G0151200|transcript|OS01T0151200-02|protein_coding||c.-971T>G|||||969|WARNING_TRANSCRIPT_NO_START_CODON,G|downstream_gene_variant|MODIFIER|OS01G0151100|OS01G0151100|transcript|OS01T0151100-01|protein…
chr01	2773276	C	T	23102.6	0/0	0/0	1/1	0/0	0/0	1/1	1/1	1/1	0/0	1/1	0/0	1/1	1/1	1/1	0/0	0/0	0/0	0/0	0/0	1/1	0/0	0/0	0/0	0/0	T|missense_variant|MODERATE|OS01G0151200|OS01G0151200|transcript|OS01T0151200-01|protein_coding|10/12|c.1268C>T|p.Thr423Ile|1421/1990|1268/1380|423/459||,T|missense_variant|MODERATE|OS01G0151200|OS01G0151200|transcript|OS01T0151200-02|protein_coding|8/10|c.557C>T|p.Thr186Ile|559/1067|557/669|186/222||WARNING_TRANSCRIPT_NO_START_CODON,T|missense_variant|MODERATE|OS01G0151200|OS01G0151200|transcrip…
chr01	2780268	C	G	22695.6	0/0	0/0	1/1	0/0	0/0	1/1	1/1	1/1	0/0	1/1	0/0	1/1	1/1	1/1	0/0	0/0	0/0	0/0	0/0	1/1	0/0	0/0	0/0	0/0	G|missense_variant|MODERATE|OS01G0151400|OS01G0151400|transcript|OS01T0151400-01|protein_coding|5/7|c.91C>G|p.Leu31Val|1458/2393|91/633|31/210||WARNING_TRANSCRIPT_NO_START_CODON
chr01	2780538	A	G	22863.6	0/0	0/0	1|1	0/0	0/0	1|1	1|1	1|1	0/0	1|1	0/0	1|1	1|1	1|1	0/0	0/0	0/0	0/0	0/0	1|1	0/0	0/0	0/0	0/0	G|missense_variant|MODERATE|OS01G0151400|OS01G0151400|transcript|OS01T0151400-01|protein_coding|6/7|c.277A>G|p.Thr93Ala|1644/2393|277/633|93/210||WARNING_TRANSCRIPT_NO_START_CODON
chr01	2780544	G	A	22792.6	0/0	0/0	1|1	0/0	0/0	1|1	1|1	1|1	0/0	1|1	0/0	1|1	1|1	1|1	0/0	0/0	0/0	0/0	0/0	1|1	0/0	0/0	0/0	0/0	A|missense_variant|MODERATE|OS01G0151400|OS01G0151400|transcript|OS01T0151400-01|protein_coding|6/7|c.283G>A|p.Ala95Thr|1650/2393|283/633|95/210||WARNING_TRANSCRIPT_NO_START_CODON
chr01	2781101	G	A	13076.6	0/0	0/0	1/1	0/0	0/0	1/1	1/1	1/1	0/0	1/1	0/0	1/1	1/1	1/1	0/0	0/0	0/0	0/0	0/0	1/1	0/0	0/0	0/0	0/0	A|missense_variant|MODERATE|OS01G0151400|OS01G0151400|transcript|OS01T0151400-01|protein_coding|7/7|c.404G>A|p.Gly135Asp|1771/2393|404/633|135/210||WARNING_TRANSCRIPT_NO_START_CODON,A|downstream_gene_variant|MODIFIER|EPlOSAG00000008792|EPlOSAG00000008792|transcript|EPlOSAT00000010180|lincRNA||n.*1719C>T|||||1719|
chr01	2781235	G	A	17751.6	0/0	0/0	1|1	0/0	0/0	1|1	1|1	1|1	0/0	1|1	0/0	1|1	1|1	1|1	0/0	0/0	0/0	0/0	0/0	1|1	0/0	0/0	0/0	0/0	A|missense_variant|MODERATE|OS01G0151400|OS01G0151400|transcript|OS01T0151400-01|protein_coding|7/7|c.538G>A|p.Ala180Thr|1905/2393|538/633|180/210||WARNING_TRANSCRIPT_NO_START_CODON,A|upstream_gene_variant|MODIFIER|OS01G0151500|OS01G0151500|transcript|OS01T0151500-00|protein_coding||c.-1954G>A|||||1954|,A|downstream_gene_variant|MODIFIER|EPlOSAG00000008792|EPlOSAG00000008792|transcript|EPlOSAT000…
chr01	2783286	T	G	21782.6	0/0	0/0	1|1	0/0	0/0	1|1	1|1	1|1	0/0	1|1	0/0	1|1	1|1	1|1	0/0	0/0	0/0	0/0	0/0	1|1	0/0	0/0	0/0	0/0	G|missense_variant|MODERATE|OS01G0151500|OS01G0151500|transcript|OS01T0151500-00|protein_coding|1/6|c.98T>G|p.Ile33Ser|98/1797|98/1653|33/550||,G|upstream_gene_variant|MODIFIER|EPlOSAG00000008792|EPlOSAG00000008792|transcript|EPlOSAT00000010180|lincRNA||n.-353A>C|||||353|,G|downstream_gene_variant|MODIFIER|OS01G0151400|OS01G0151400|transcript|OS01T0151400-01|protein_coding||c.*1956T>G|||||1563|WA…
chr01	2783331	A	T	22594.6	0/0	0/0	1|1	0/0	0/0	1|1	1|1	1|1	0/0	1|1	0/0	1|1	1|1	1|1	0/0	0/0	0/0	0/0	0/0	1|1	0/0	0/0	0/0	0/0	T|missense_variant|MODERATE|OS01G0151500|OS01G0151500|transcript|OS01T0151500-00|protein_coding|1/6|c.143A>T|p.His48Leu|143/1797|143/1653|48/550||,T|upstream_gene_variant|MODIFIER|EPlOSAG00000008792|EPlOSAG00000008792|transcript|EPlOSAT00000010180|lincRNA||n.-398T>A|||||398|,T|downstream_gene_variant|MODIFIER|OS01G0151400|OS01G0151400|transcript|OS01T0151400-01|protein_coding||c.*2001A>T|||||1608…
chr01	2783333	C	G	22628.6	0/0	0/0	1|1	0/0	0/0	1|1	1|1	1|1	0/0	1|1	0/0	1|1	1|1	1|1	0/0	0/0	0/0	0/0	0/0	1|1	0/0	0/0	0/0	0/0	G|missense_variant|MODERATE|OS01G0151500|OS01G0151500|transcript|OS01T0151500-00|protein_coding|1/6|c.145C>G|p.Leu49Val|145/1797|145/1653|49/550||,G|upstream_gene_variant|MODIFIER|EPlOSAG00000008792|EPlOSAG00000008792|transcript|EPlOSAT00000010180|lincRNA||n.-400G>C|||||400|,G|downstream_gene_variant|MODIFIER|OS01G0151400|OS01G0151400|transcript|OS01T0151400-01|protein_coding||c.*2003C>G|||||1610…
chr01	2783334	T	C	22554.6	0/0	0/0	1|1	0/0	0/0	1|1	1|1	1|1	0/0	1|1	0/0	1|1	1|1	1|1	0/0	0/0	0/0	0/0	0/0	1|1	0/0	0/0	0/0	0/0	C|missense_variant|MODERATE|OS01G0151500|OS01G0151500|transcript|OS01T0151500-00|protein_coding|1/6|c.146T>C|p.Leu49Pro|146/1797|146/1653|49/550||,C|upstream_gene_variant|MODIFIER|EPlOSAG00000008792|EPlOSAG00000008792|transcript|EPlOSAT00000010180|lincRNA||n.-401A>G|||||401|,C|downstream_gene_variant|MODIFIER|OS01G0151400|OS01G0151400|transcript|OS01T0151400-01|protein_coding||c.*2004T>C|||||1611…
chr01	2783555	G	C	16091.8	0/0	0/0	1/1	0/0	0/0	1/1	1/1	1/1	0/0	1/1	0/0	1/1	1/1	1/1	0/0	0/0	0/0	0/0	0/0	1/1	0/0	0/0	0/0	0/0	C|missense_variant|MODERATE|OS01G0151500|OS01G0151500|transcript|OS01T0151500-00|protein_coding|1/6|c.367G>C|p.Val123Leu|367/1797|367/1653|123/550||,C|upstream_gene_variant|MODIFIER|EPlOSAG00000008792|EPlOSAG00000008792|transcript|EPlOSAT00000010180|lincRNA||n.-622C>G|||||622|,C|upstream_gene_variant|MODIFIER|EPlOSAG00000025406|EPlOSAG00000025406|transcript|EPlOSAT00000026794|lincRNA||n.-1862G>C|…
chr01	2783568	C	A	15191.9	0/0	0/0	1/1	0/0	0/0	1/1	1/1	1/1	0/0	1/1	0/0	1/1	1/1	1/1	0/0	0/0	0/0	0/0	0/0	1/1	0/0	0/0	0/0	0/0	A|missense_variant|MODERATE|OS01G0151500|OS01G0151500|transcript|OS01T0151500-00|protein_coding|1/6|c.380C>A|p.Ala127Glu|380/1797|380/1653|127/550||,A|upstream_gene_variant|MODIFIER|EPlOSAG00000008792|EPlOSAG00000008792|transcript|EPlOSAT00000010180|lincRNA||n.-635G>T|||||635|,A|upstream_gene_variant|MODIFIER|EPlOSAG00000025406|EPlOSAG00000025406|transcript|EPlOSAT00000026794|lincRNA||n.-1849C>A|…
chr01	2788572	A	C	21167.6	0/0	0/0	1|1	0/0	0/0	1|1	1|1	1|1	0/0	1|1	0/0	1|1	1|1	1|1	0/0	0/0	0/0	0/0	0/0	1|1	0/0	0/0	0/0	0/0	C|missense_variant|MODERATE|OS01G0151500|OS01G0151500|transcript|OS01T0151500-00|protein_coding|2/6|c.863A>C|p.Lys288Thr|863/1797|863/1653|288/550||
chr01	2788795	A	G	21846.6	0/0	0/0	1/1	0/0	0/0	1/1	1/1	1/1	0/0	1/1	0/0	1/1	1/1	1/1	0/0	0/0	0/0	0/0	0/0	1/1	0/0	0/0	0/0	0/0	G|missense_variant|MODERATE|OS01G0151500|OS01G0151500|transcript|OS01T0151500-00|protein_coding|3/6|c.997A>G|p.Ser333Gly|997/1797|997/1653|333/550||
chr01	2788912	A	G	20079.6	0/0	0/0	1/1	0/0	0/0	1/1	1/1	1/1	0/0	1/1	0/0	1/1	1/1	1/1	0/0	0/0	0/0	0/0	0/0	1/1	0/0	0/0	0/0	0/0	G|missense_variant|MODERATE|OS01G0151500|OS01G0151500|transcript|OS01T0151500-00|protein_coding|3/6|c.1114A>G|p.Ile372Val|1114/1797|1114/1653|372/550||
chr01	2789193	A	T	17200.6	0/0	0/0	1/1	0/0	0/0	1/1	1/1	1/1	0/0	1/1	0/0	1/1	1/1	1/1	0/0	0/0	0/0	0/0	0/0	1/1	0/0	0/0	0/0	0/0	T|missense_variant|MODERATE|OS01G0151500|OS01G0151500|transcript|OS01T0151500-00|protein_coding|4/6|c.1301A>T|p.Glu434Val|1301/1797|1301/1653|434/550||
chr01	2789291	C	A	19688.6	0/0	0/0	1|1	0/0	0/0	1|1	1|1	1|1	0/0	1|1	0/0	1|1	1|1	1|1	0/0	0/0	0/0	0/0	0/0	1|1	0/0	0/0	0/0	0/0	A|missense_variant|MODERATE|OS01G0151500|OS01G0151500|transcript|OS01T0151500-00|protein_coding|4/6|c.1399C>A|p.Pro467Thr|1399/1797|1399/1653|467/550||
chr01	2789301	A	G	19901.6	0/0	0/0	1|1	0/0	0/0	1|1	1|1	1|1	0/0	1|1	0/0	1|1	1|1	1|1	0/0	0/0	0/0	0/0	0/0	1|1	0/0	0/0	0/0	0/0	G|missense_variant|MODERATE|OS01G0151500|OS01G0151500|transcript|OS01T0151500-00|protein_coding|4/6|c.1409A>G|p.Asn470Ser|1409/1797|1409/1653|470/550||
chr01	2789384	T	C	11817.6	0/0	0/0	1|1	0/0	0/0	1|1	1|1	1|1	0/0	1|1	0/0	1|1	1|1	1|1	0/0	0/0	0/0	0/0	0/0	1|1	0/0	0/0	0/0	0/0	C|missense_variant|MODERATE|OS01G0151500|OS01G0151500|transcript|OS01T0151500-00|protein_coding|4/6|c.1492T>C|p.Cys498Arg|1492/1797|1492/1653|498/550||
chr01	2789385	G	GTAGT	11997.6	0/0	0/0	1|1	0/0	0/0	1|1	1|1	1|1	0/0	1|1	0/0	1|1	1|1	1|1	0/0	0/0	0/0	0/0	0/0	1|1	0/0	0/0	0/0	0/0	GTAGT|frameshift_variant|HIGH|OS01G0151500|OS01G0151500|transcript|OS01T0151500-00|protein_coding|4/6|c.1482_1483insGTTA|p.Leu495fs|1483/1797|1483/1653|495/550||INFO_REALIGN_3_PRIME
chr01	2805913	A	C	23937.6	0/0	0/0	1|1	0/0	0/0	1|1	1|1	1|1	0/0	1|1	0/0	1|1	1|1	1|1	0/0	0/0	0/0	0/0	0/0	1|1	0/0	0/0	0/0	0/0	C|missense_variant&splice_region_variant|MODERATE|OS01G0151900|OS01G0151900|transcript|OS01T0151900-01|protein_coding|2/2|c.67A>C|p.Ile23Leu|121/2360|67/1605|23/534||,C|downstream_gene_variant|MODIFIER|EPlOSAG00000016650|EPlOSAG00000016650|transcript|EPlOSAT00000018038|lincRNA||n.*1474T>G|||||1474|
chr01	2805971	T	A	22963.6	0/0	0/0	1|1	0/0	0/0	1|1	1|1	1|1	0/0	1|1	0/0	1|1	1|1	1|1	0/0	0/0	0/0	0/0	0/0	1|1	0/0	0/0	0/0	0/0	A|missense_variant|MODERATE|OS01G0151900|OS01G0151900|transcript|OS01T0151900-01|protein_coding|2/2|c.125T>A|p.Val42Glu|179/2360|125/1605|42/534||,A|downstream_gene_variant|MODIFIER|EPlOSAG00000016650|EPlOSAG00000016650|transcript|EPlOSAT00000018038|lincRNA||n.*1416A>T|||||1416|
chr01	2805975	G	C	23796.6	0/0	0/0	1|1	0/0	0/0	1|1	1|1	1|1	0/0	1|1	0/0	1|1	1|1	1|1	0/0	0/0	0/0	0/0	0/0	1|1	0/0	0/0	0/0	0/0	C|missense_variant|MODERATE|OS01G0151900|OS01G0151900|transcript|OS01T0151900-01|protein_coding|2/2|c.129G>C|p.Glu43Asp|183/2360|129/1605|43/534||,C|downstream_gene_variant|MODIFIER|EPlOSAG00000016650|EPlOSAG00000016650|transcript|EPlOSAT00000018038|lincRNA||n.*1412C>G|||||1412|
chr01	2805994	T	C	20808.6	0/0	0/0	1/1	0/0	0/0	1/1	1/1	1/1	0/0	1/1	0/0	1/1	1/1	1/1	0/0	0/0	0/0	0/0	0/0	1/1	0/0	0/0	0/0	0/0	C|missense_variant|MODERATE|OS01G0151900|OS01G0151900|transcript|OS01T0151900-01|protein_coding|2/2|c.148T>C|p.Tyr50His|202/2360|148/1605|50/534||,C|downstream_gene_variant|MODIFIER|EPlOSAG00000016650|EPlOSAG00000016650|transcript|EPlOSAT00000018038|lincRNA||n.*1393A>G|||||1393|
chr01	2806015	A	G	22955.6	0/0	0/0	1|1	0/0	0/0	1|1	1|1	1|1	0/0	1|1	0/0	1|1	1|1	1|1	0/0	0/0	0/0	0/0	0/0	1|1	0/0	0/0	0/0	0/0	G|missense_variant|MODERATE|OS01G0151900|OS01G0151900|transcript|OS01T0151900-01|protein_coding|2/2|c.169A>G|p.Ile57Val|223/2360|169/1605|57/534||,G|downstream_gene_variant|MODIFIER|EPlOSAG00000016650|EPlOSAG00000016650|transcript|EPlOSAT00000018038|lincRNA||n.*1372T>C|||||1372|
chr01	2806036	G	C	23233.6	0/0	0/0	1|1	0/0	0/0	1|1	1|1	1|1	0/0	1|1	0/0	1|1	1|1	1|1	0/0	0/0	0/0	0/0	0/0	1/1	0/0	0/0	0/0	0/0	C|missense_variant|MODERATE|OS01G0151900|OS01G0151900|transcript|OS01T0151900-01|protein_coding|2/2|c.190G>C|p.Val64Leu|244/2360|190/1605|64/534||,C|downstream_gene_variant|MODIFIER|EPlOSAG00000016650|EPlOSAG00000016650|transcript|EPlOSAT00000018038|lincRNA||n.*1351C>G|||||1351|
chr01	2806067	C	T	21379.6	0/0	0/0	1/1	0/0	0/0	1/1	1/1	1/1	0/0	1/1	0/0	1/1	1/1	1/1	0/0	0/0	0/0	0/0	0/0	1/1	0/0	0/0	0/0	0/0	T|missense_variant|MODERATE|OS01G0151900|OS01G0151900|transcript|OS01T0151900-01|protein_coding|2/2|c.221C>T|p.Ala74Val|275/2360|221/1605|74/534||,T|downstream_gene_variant|MODIFIER|EPlOSAG00000016650|EPlOSAG00000016650|transcript|EPlOSAT00000018038|lincRNA||n.*1320G>A|||||1320|
chr01	2806165	G	T	26159.6	0/0	0/0	1|1	0/0	0/0	1|1	1|1	1|1	0/0	1|1	0/0	1|1	1|1	1|1	0/0	0/0	0/0	0/0	0/0	1|1	0/0	0/0	0/0	0/0	T|missense_variant|MODERATE|OS01G0151900|OS01G0151900|transcript|OS01T0151900-01|protein_coding|2/2|c.319G>T|p.Ala107Ser|373/2360|319/1605|107/534||,T|downstream_gene_variant|MODIFIER|EPlOSAG00000016650|EPlOSAG00000016650|transcript|EPlOSAT00000018038|lincRNA||n.*1222C>A|||||1222|
chr01	2806366	G	A	23035.6	0/0	0/0	1|1	0/0	0/0	1|1	1|1	1|1	0/0	1|1	0/0	1|1	1|1	1|1	0/0	0/0	0/0	0/0	0/0	1|1	0/0	0/0	0/0	0/0	A|missense_variant|MODERATE|OS01G0151900|OS01G0151900|transcript|OS01T0151900-01|protein_coding|2/2|c.520G>A|p.Val174Met|574/2360|520/1605|174/534||,A|downstream_gene_variant|MODIFIER|EPlOSAG00000016650|EPlOSAG00000016650|transcript|EPlOSAT00000018038|lincRNA||n.*1021C>T|||||1021|
chr01	2807264	A	G	24506.6	0/0	0/0	1|1	0/0	0/0	1|1	1|1	1|1	0/0	1|1	0/0	1|1	1|1	1|1	0/0	0/0	0/0	0/0	0/0	1|1	0/0	0/0	0/0	0/0	G|missense_variant|MODERATE|OS01G0151900|OS01G0151900|transcript|OS01T0151900-01|protein_coding|2/2|c.1418A>G|p.Asp473Gly|1472/2360|1418/1605|473/534||,G|downstream_gene_variant|MODIFIER|EPlOSAG00000016650|EPlOSAG00000016650|transcript|EPlOSAT00000018038|lincRNA||n.*123T>C|||||123|
chr01	2807386	G	GAAC	25849.6	0/0	0/0	1/1	0/0	0/0	1/1	1/1	1/1	0/0	1/1	0/0	1/1	1/1	1/1	0/0	0/0	0/0	0/0	0/0	1/1	0/0	0/0	0/0	0/0	GAAC|disruptive_inframe_insertion|MODERATE|OS01G0151900|OS01G0151900|transcript|OS01T0151900-01|protein_coding|2/2|c.1541_1543dupAAC|p.Glu514_Pro515insGln|1598/2360|1544/1605|515/534||INFO_REALIGN_3_PRIME,GAAC|splice_region_variant&non_coding_transcript_exon_variant|LOW|EPlOSAG00000016650|EPlOSAG00000016650|transcript|EPlOSAT00000018038|lincRNA|1/1|n.76_78dupGTT||||||
chr01	2811353	T	G	18259.6	0/0	0/0	1|1	0/0	0/0	1|1	1|1	1|1	0/0	1|1	0/0	1|1	1|1	1|1	0/0	0/0	0/0	0/0	0/0	1|1	0/0	0/0	0/0	0/0	G|missense_variant|MODERATE|OS01G0152000|OS01G0152000|transcript|OS01T0152000-01|protein_coding|2/3|c.14T>G|p.Leu5Arg|921/4485|14/3198|5/1065||,G|upstream_gene_variant|MODIFIER|EPlOSAG00000022574|EPlOSAG00000022574|transcript|EPlOSAT00000023962|lincRNA||n.-1444A>C|||||1444|,G|downstream_gene_variant|MODIFIER|OS01G0152050|OS01G0152050|transcript|OS01T0152050-00|protein_coding||c.*1423A>C|||||145|
chr01	2811373	CTGCTGTCCGTCTTCA	C	19414.6	0/0	0/0	1|1	0/0	0/0	1|1	1|1	1|1	0/0	1|1	0/0	1|1	1|1	1|1	0/0	0/0	0/0	0/0	0/0	1|1	0/0	0/0	0/0	0/0	C|conservative_inframe_deletion|MODERATE|OS01G0152000|OS01G0152000|transcript|OS01T0152000-01|protein_coding|2/3|c.37_51delCTGTCCGTCTTCATG|p.Leu13_Met17del|944/4485|37/3198|13/1065||INFO_REALIGN_3_PRIME,C|upstream_gene_variant|MODIFIER|EPlOSAG00000022574|EPlOSAG00000022574|transcript|EPlOSAT00000023962|lincRNA||n.-1479_-1465delTGAAGACGGACAGCA|||||1465|,C|downstream_gene_variant|MODIFIER|OS01G0152…
chr01	2811467	T	C	19480.6	0/0	0/0	1/1	0/0	0/0	1/1	1/1	1/1	0/0	1/1	0/0	1/1	1/1	1/1	0/0	0/0	0/0	0/0	0/0	1/1	0/0	0/0	0/0	0/0	C|missense_variant|MODERATE|OS01G0152000|OS01G0152000|transcript|OS01T0152000-01|protein_coding|2/3|c.128T>C|p.Val43Ala|1035/4485|128/3198|43/1065||,C|upstream_gene_variant|MODIFIER|EPlOSAG00000022574|EPlOSAG00000022574|transcript|EPlOSAT00000023962|lincRNA||n.-1558A>G|||||1558|,C|downstream_gene_variant|MODIFIER|OS01G0152050|OS01G0152050|transcript|OS01T0152050-00|protein_coding||c.*1309A>G|||||…
chr01	2811539	A	G	21240.6	0/0	0/0	1|1	0/0	0/0	1|1	1|1	1|1	0/0	1|1	0/0	1|1	1|1	1|1	0/0	0/0	0/0	0/0	0/0	1|1	0/0	0/0	0/0	0/0	G|missense_variant|MODERATE|OS01G0152000|OS01G0152000|transcript|OS01T0152000-01|protein_coding|2/3|c.200A>G|p.Glu67Gly|1107/4485|200/3198|67/1065||,G|3_prime_UTR_variant|MODIFIER|OS01G0152050|OS01G0152050|transcript|OS01T0152050-00|protein_coding|2/2|c.*1237T>C|||||1237|,G|upstream_gene_variant|MODIFIER|EPlOSAG00000022574|EPlOSAG00000022574|transcript|EPlOSAT00000023962|lincRNA||n.-1630T>C|||||1…
chr01	2811547	G	A	20836.6	0/0	0/0	1|1	0/0	0/0	1|1	1|1	1|1	0/0	1|1	0/0	1|1	1|1	1|1	0/0	0/0	0/0	0/0	0/0	1|1	0/0	0/0	0/0	0/0	A|missense_variant|MODERATE|OS01G0152000|OS01G0152000|transcript|OS01T0152000-01|protein_coding|2/3|c.208G>A|p.Ala70Thr|1115/4485|208/3198|70/1065||,A|3_prime_UTR_variant|MODIFIER|OS01G0152050|OS01G0152050|transcript|OS01T0152050-00|protein_coding|2/2|c.*1229C>T|||||1229|,A|upstream_gene_variant|MODIFIER|EPlOSAG00000022574|EPlOSAG00000022574|transcript|EPlOSAT00000023962|lincRNA||n.-1638C>T|||||1…
chr01	2811562	G	C	18861.6	0/0	0/0	1/1	0/0	0/0	1/1	1/1	1/1	0/0	1/1	0/0	1/1	1/1	1/1	0/0	0/0	0/0	0/0	0/0	1/1	0/0	0/0	0/0	0/0	C|missense_variant|MODERATE|OS01G0152000|OS01G0152000|transcript|OS01T0152000-01|protein_coding|2/3|c.223G>C|p.Gly75Arg|1130/4485|223/3198|75/1065||,C|3_prime_UTR_variant|MODIFIER|OS01G0152050|OS01G0152050|transcript|OS01T0152050-00|protein_coding|2/2|c.*1214C>G|||||1214|,C|upstream_gene_variant|MODIFIER|EPlOSAG00000022574|EPlOSAG00000022574|transcript|EPlOSAT00000023962|lincRNA||n.-1653C>G|||||1…
chr01	2811638	C	G	21195.6	0/0	0/0	1/1	0/0	0/0	1/1	1/1	1/1	0/0	1/1	0/0	1/1	1/1	1/1	0/0	0/0	0/0	0/0	0/0	1/1	0/0	0/0	0/0	0/0	G|missense_variant|MODERATE|OS01G0152000|OS01G0152000|transcript|OS01T0152000-01|protein_coding|2/3|c.299C>G|p.Ser100Trp|1206/4485|299/3198|100/1065||,G|3_prime_UTR_variant|MODIFIER|OS01G0152050|OS01G0152050|transcript|OS01T0152050-00|protein_coding|2/2|c.*1138G>C|||||1138|,G|upstream_gene_variant|MODIFIER|EPlOSAG00000022574|EPlOSAG00000022574|transcript|EPlOSAT00000023962|lincRNA||n.-1729G>C||||…
chr01	2811857	A	G	22181.6	0/0	0/0	1/1	0/0	0/0	1/1	1|1	1/1	0/0	1/1	0/0	1/1	1/1	1/1	0/0	0/0	0/0	0/0	0/0	1/1	0/0	0/0	0/0	0/0	G|missense_variant|MODERATE|OS01G0152000|OS01G0152000|transcript|OS01T0152000-01|protein_coding|2/3|c.518A>G|p.Gln173Arg|1425/4485|518/3198|173/1065||,G|3_prime_UTR_variant|MODIFIER|OS01G0152050|OS01G0152050|transcript|OS01T0152050-00|protein_coding|2/2|c.*919T>C|||||919|,G|upstream_gene_variant|MODIFIER|EPlOSAG00000022574|EPlOSAG00000022574|transcript|EPlOSAT00000023962|lincRNA||n.-1948T>C|||||1…
chr01	2811934	G	C	26701.6	0/0	0/0	1|1	0/0	0/0	1|1	1|1	1|1	0/0	1|1	0/0	1|1	1|1	1|1	0/0	0/0	0/0	0/0	0/0	1|1	0/0	0/0	0/0	0/0	C|missense_variant|MODERATE|OS01G0152000|OS01G0152000|transcript|OS01T0152000-01|protein_coding|2/3|c.595G>C|p.Gly199Arg|1502/4485|595/3198|199/1065||,C|3_prime_UTR_variant|MODIFIER|OS01G0152050|OS01G0152050|transcript|OS01T0152050-00|protein_coding|2/2|c.*842C>G|||||842|,C|upstream_gene_variant|MODIFIER|EPlOSAG00000013645|EPlOSAG00000013645|transcript|EPlOSAT00000015033|lincRNA||n.-1677G>C|||||1…
chr01	2811935	G	A	26476.6	0/0	0/0	1|1	0/0	0/0	1|1	1|1	1|1	0/0	1|1	0/0	1|1	1|1	1|1	0/0	0/0	0/0	0/0	0/0	1|1	0/0	0/0	0/0	0/0	A|missense_variant|MODERATE|OS01G0152000|OS01G0152000|transcript|OS01T0152000-01|protein_coding|2/3|c.596G>A|p.Gly199Glu|1503/4485|596/3198|199/1065||,A|3_prime_UTR_variant|MODIFIER|OS01G0152050|OS01G0152050|transcript|OS01T0152050-00|protein_coding|2/2|c.*841C>T|||||841|,A|upstream_gene_variant|MODIFIER|EPlOSAG00000013645|EPlOSAG00000013645|transcript|EPlOSAT00000015033|lincRNA||n.-1676G>A|||||1…
chr01	2812003	C	A	27336.6	0/0	0/0	1|1	0/0	0/0	1|1	1|1	1|1	0/0	1|1	0/0	1|1	1|1	1|1	0/0	0/0	0/0	0/0	0/0	1|1	0/0	0/0	0/0	0/0	A|missense_variant|MODERATE|OS01G0152000|OS01G0152000|transcript|OS01T0152000-01|protein_coding|2/3|c.664C>A|p.Arg222Ser|1571/4485|664/3198|222/1065||,A|3_prime_UTR_variant|MODIFIER|OS01G0152050|OS01G0152050|transcript|OS01T0152050-00|protein_coding|2/2|c.*773G>T|||||773|,A|upstream_gene_variant|MODIFIER|EPlOSAG00000013645|EPlOSAG00000013645|transcript|EPlOSAT00000015033|lincRNA||n.-1608C>A|||||1…
chr01	2812006	C	T	27432.6	0/0	0/0	1|1	0/0	0/0	1|1	1|1	1|1	0/0	1|1	0/0	1|1	1|1	1|1	0/0	0/0	0/0	0/0	0/0	1|1	0/0	0/0	0/0	0/0	T|missense_variant|MODERATE|OS01G0152000|OS01G0152000|transcript|OS01T0152000-01|protein_coding|2/3|c.667C>T|p.Leu223Phe|1574/4485|667/3198|223/1065||,T|3_prime_UTR_variant|MODIFIER|OS01G0152050|OS01G0152050|transcript|OS01T0152050-00|protein_coding|2/2|c.*770G>A|||||770|,T|upstream_gene_variant|MODIFIER|EPlOSAG00000013645|EPlOSAG00000013645|transcript|EPlOSAT00000015033|lincRNA||n.-1605C>T|||||1…
chr01	2812009	T	C	27747.6	0/0	0/0	1|1	0/0	0/0	1|1	1|1	1|1	0/0	1|1	0/0	1|1	1|1	1|1	0/0	0/0	0/0	0/0	0/0	1|1	0/0	0/0	0/0	0/0	C|missense_variant|MODERATE|OS01G0152000|OS01G0152000|transcript|OS01T0152000-01|protein_coding|2/3|c.670T>C|p.Tyr224His|1577/4485|670/3198|224/1065||,C|3_prime_UTR_variant|MODIFIER|OS01G0152050|OS01G0152050|transcript|OS01T0152050-00|protein_coding|2/2|c.*767A>G|||||767|,C|upstream_gene_variant|MODIFIER|EPlOSAG00000013645|EPlOSAG00000013645|transcript|EPlOSAT00000015033|lincRNA||n.-1602T>C|||||1…
chr01	2812012	T	A	27602.6	0/0	0/0	1|1	0/0	0/0	1|1	1|1	1|1	0/0	1|1	0/0	1|1	1|1	1|1	0/0	0/0	0/0	0/0	0/0	1|1	0/0	0/0	0/0	0/0	A|missense_variant|MODERATE|OS01G0152000|OS01G0152000|transcript|OS01T0152000-01|protein_coding|2/3|c.673T>A|p.Phe225Ile|1580/4485|673/3198|225/1065||,A|3_prime_UTR_variant|MODIFIER|OS01G0152050|OS01G0152050|transcript|OS01T0152050-00|protein_coding|2/2|c.*764A>T|||||764|,A|upstream_gene_variant|MODIFIER|EPlOSAG00000013645|EPlOSAG00000013645|transcript|EPlOSAT00000015033|lincRNA||n.-1599T>A|||||1…
chr01	2812021	A	G	26637.6	0/0	0/0	1|1	0/0	0/0	1|1	1|1	1|1	0/0	1|1	0/0	1|1	1|1	1|1	0/0	0/0	0/0	0/0	0/0	1|1	0/0	0/0	0/0	0/0	G|missense_variant|MODERATE|OS01G0152000|OS01G0152000|transcript|OS01T0152000-01|protein_coding|2/3|c.682A>G|p.Ile228Val|1589/4485|682/3198|228/1065||,G|3_prime_UTR_variant|MODIFIER|OS01G0152050|OS01G0152050|transcript|OS01T0152050-00|protein_coding|2/2|c.*755T>C|||||755|,G|upstream_gene_variant|MODIFIER|EPlOSAG00000013645|EPlOSAG00000013645|transcript|EPlOSAT00000015033|lincRNA||n.-1590A>G|||||1…
chr01	2812082	T	C	28068.6	0/0	0/0	1|1	0/0	0/0	1|1	1|1	1|1	0/0	1|1	0/0	1|1	1|1	1|1	0/0	0/0	0/0	0/0	0/0	1|1	0/0	0/0	0/0	0/0	C|missense_variant|MODERATE|OS01G0152000|OS01G0152000|transcript|OS01T0152000-01|protein_coding|2/3|c.743T>C|p.Met248Thr|1650/4485|743/3198|248/1065||,C|3_prime_UTR_variant|MODIFIER|OS01G0152050|OS01G0152050|transcript|OS01T0152050-00|protein_coding|2/2|c.*694A>G|||||694|,C|upstream_gene_variant|MODIFIER|EPlOSAG00000013645|EPlOSAG00000013645|transcript|EPlOSAT00000015033|lincRNA||n.-1529T>C|||||1…
chr01	2812085	G	A	28287.6	0/0	0/0	1|1	0/0	0/0	1|1	1|1	1|1	0/0	1|1	0/0	1|1	1|1	1|1	0/0	0/0	0/0	0/0	0/0	1|1	0/0	0/0	0/0	0/0	A|missense_variant|MODERATE|OS01G0152000|OS01G0152000|transcript|OS01T0152000-01|protein_coding|2/3|c.746G>A|p.Gly249Glu|1653/4485|746/3198|249/1065||,A|3_prime_UTR_variant|MODIFIER|OS01G0152050|OS01G0152050|transcript|OS01T0152050-00|protein_coding|2/2|c.*691C>T|||||691|,A|upstream_gene_variant|MODIFIER|EPlOSAG00000013645|EPlOSAG00000013645|transcript|EPlOSAT00000015033|lincRNA||n.-1526G>A|||||1…
chr01	2812111	G	A	27193.6	0/0	0/0	1|1	0/0	0/0	1|1	1|1	1|1	0/0	1|1	0/0	1|1	1|1	1|1	0/0	0/0	0/0	0/0	0/0	1|1	0/0	0/0	0/0	0/0	A|missense_variant|MODERATE|OS01G0152000|OS01G0152000|transcript|OS01T0152000-01|protein_coding|2/3|c.772G>A|p.Asp258Asn|1679/4485|772/3198|258/1065||,A|3_prime_UTR_variant|MODIFIER|OS01G0152050|OS01G0152050|transcript|OS01T0152050-00|protein_coding|2/2|c.*665C>T|||||665|,A|upstream_gene_variant|MODIFIER|EPlOSAG00000013645|EPlOSAG00000013645|transcript|EPlOSAT00000015033|lincRNA||n.-1500G>A|||||1…
chr01	2812118	G	A	27120.6	0/0	0/0	1|1	0/0	0/0	1|1	1|1	1|1	0/0	1|1	0/0	1|1	1|1	1|1	0/0	0/0	0/0	0/0	0/0	1|1	0/0	0/0	0/0	0/0	A|missense_variant|MODERATE|OS01G0152000|OS01G0152000|transcript|OS01T0152000-01|protein_coding|2/3|c.779G>A|p.Ser260Asn|1686/4485|779/3198|260/1065||,A|3_prime_UTR_variant|MODIFIER|OS01G0152050|OS01G0152050|transcript|OS01T0152050-00|protein_coding|2/2|c.*658C>T|||||658|,A|upstream_gene_variant|MODIFIER|EPlOSAG00000013645|EPlOSAG00000013645|transcript|EPlOSAT00000015033|lincRNA||n.-1493G>A|||||1…
chr01	2812123	G	C	26529.6	0/0	0/0	1|1	0/0	0/0	1|1	1|1	1|1	0/0	1|1	0/0	1|1	1|1	1|1	0/0	0/0	0/0	0/0	0/0	1|1	0/0	0/0	0/0	0/0	C|missense_variant|MODERATE|OS01G0152000|OS01G0152000|transcript|OS01T0152000-01|protein_coding|2/3|c.784G>C|p.Ala262Pro|1691/4485|784/3198|262/1065||,C|3_prime_UTR_variant|MODIFIER|OS01G0152050|OS01G0152050|transcript|OS01T0152050-00|protein_coding|2/2|c.*653C>G|||||653|,C|upstream_gene_variant|MODIFIER|EPlOSAG00000013645|EPlOSAG00000013645|transcript|EPlOSAT00000015033|lincRNA||n.-1488G>C|||||1…
chr01	2812157	A	G	25475.6	0/0	0/0	1/1	0/0	0/0	1/1	1/1	1/1	0/0	1/1	0/0	1/1	1/1	1/1	0/0	0/0	0/0	0/0	0/0	1/1	0/0	0/0	0/0	0/0	G|missense_variant|MODERATE|OS01G0152000|OS01G0152000|transcript|OS01T0152000-01|protein_coding|2/3|c.818A>G|p.Gln273Arg|1725/4485|818/3198|273/1065||,G|3_prime_UTR_variant|MODIFIER|OS01G0152050|OS01G0152050|transcript|OS01T0152050-00|protein_coding|2/2|c.*619T>C|||||619|,G|upstream_gene_variant|MODIFIER|EPlOSAG00000013645|EPlOSAG00000013645|transcript|EPlOSAT00000015033|lincRNA||n.-1454A>G|||||1…
chr01	2812210	T	A	27256.6	0/0	0/0	1|1	0/0	0/0	1/1	1|1	1|1	0/0	1|1	0/0	1|1	1|1	1|1	0/0	0/0	0/0	0/0	0/0	1|1	0/0	0/0	0/0	0/0	A|missense_variant|MODERATE|OS01G0152000|OS01G0152000|transcript|OS01T0152000-01|protein_coding|2/3|c.871T>A|p.Ser291Thr|1778/4485|871/3198|291/1065||,A|3_prime_UTR_variant|MODIFIER|OS01G0152050|OS01G0152050|transcript|OS01T0152050-00|protein_coding|2/2|c.*566A>T|||||566|,A|upstream_gene_variant|MODIFIER|EPlOSAG00000013645|EPlOSAG00000013645|transcript|EPlOSAT00000015033|lincRNA||n.-1401T>A|||||1…
chr01	2812245	AAT	A	28437.6	0/0	0/0	1|1	0/0	0/0	1|1	1|1	1|1	0/0	1|1	0/0	1|1	1|1	1|1	0/0	0/0	0/0	0/0	0/0	1|1	0/0	0/0	0/0	0/0	A|frameshift_variant|HIGH|OS01G0152000|OS01G0152000|transcript|OS01T0152000-01|protein_coding|2/3|c.907_908delAT|p.Met303fs|1814/4485|907/3198|303/1065||,A|3_prime_UTR_variant|MODIFIER|OS01G0152050|OS01G0152050|transcript|OS01T0152050-00|protein_coding|2/2|c.*529_*530delAT|||||529|,A|upstream_gene_variant|MODIFIER|EPlOSAG00000013645|EPlOSAG00000013645|transcript|EPlOSAT00000015033|lincRNA||n.-136…
chr01	2812248	G	GAA	28035.6	0/0	0/0	1|1	0/0	0/0	1|1	1|1	1|1	0/0	1|1	0/0	1|1	1|1	1|1	0/0	0/0	0/0	0/0	0/0	1|1	0/0	0/0	0/0	0/0	GAA|frameshift_variant|HIGH|OS01G0152000|OS01G0152000|transcript|OS01T0152000-01|protein_coding|2/3|c.910_911dupAA|p.Asn304fs|1819/4485|912/3198|304/1065||INFO_REALIGN_3_PRIME,GAA|3_prime_UTR_variant|MODIFIER|OS01G0152050|OS01G0152050|transcript|OS01T0152050-00|protein_coding|2/2|c.*526_*527dupTT|||||527|,GAA|upstream_gene_variant|MODIFIER|EPlOSAG00000013645|EPlOSAG00000013645|transcript|EPlOSAT0…
chr01	2812252	G	A	27637.6	0/0	0/0	1|1	0/0	0/0	1|1	1|1	1|1	0/0	1|1	0/0	1|1	1|1	1|1	0/0	0/0	0/0	0/0	0/0	1|1	0/0	0/0	0/0	0/0	A|missense_variant|MODERATE|OS01G0152000|OS01G0152000|transcript|OS01T0152000-01|protein_coding|2/3|c.913G>A|p.Gly305Arg|1820/4485|913/3198|305/1065||,A|3_prime_UTR_variant|MODIFIER|OS01G0152050|OS01G0152050|transcript|OS01T0152050-00|protein_coding|2/2|c.*524C>T|||||524|,A|upstream_gene_variant|MODIFIER|EPlOSAG00000013645|EPlOSAG00000013645|transcript|EPlOSAT00000015033|lincRNA||n.-1359G>A|||||1…
chr01	2812274	A	G	27702.6	0/0	0/0	1|1	0/0	0/0	1|1	1|1	1|1	0/0	1|1	0/0	1|1	1|1	1|1	0/0	0/0	0/0	0/0	0/0	1|1	0/0	0/0	0/0	0/0	G|missense_variant|MODERATE|OS01G0152000|OS01G0152000|transcript|OS01T0152000-01|protein_coding|2/3|c.935A>G|p.His312Arg|1842/4485|935/3198|312/1065||,G|3_prime_UTR_variant|MODIFIER|OS01G0152050|OS01G0152050|transcript|OS01T0152050-00|protein_coding|2/2|c.*502T>C|||||502|,G|upstream_gene_variant|MODIFIER|EPlOSAG00000013645|EPlOSAG00000013645|transcript|EPlOSAT00000015033|lincRNA||n.-1337A>G|||||1…
chr01	2812276	A	G	27738.6	0/0	0/0	1|1	0/0	0/0	1|1	1|1	1|1	0/0	1|1	0/0	1|1	1|1	1|1	0/0	0/0	0/0	0/0	0/0	1|1	0/0	0/0	0/0	0/0	G|missense_variant|MODERATE|OS01G0152000|OS01G0152000|transcript|OS01T0152000-01|protein_coding|2/3|c.937A>G|p.Asn313Asp|1844/4485|937/3198|313/1065||,G|3_prime_UTR_variant|MODIFIER|OS01G0152050|OS01G0152050|transcript|OS01T0152050-00|protein_coding|2/2|c.*500T>C|||||500|,G|upstream_gene_variant|MODIFIER|EPlOSAG00000013645|EPlOSAG00000013645|transcript|EPlOSAT00000015033|lincRNA||n.-1335A>G|||||1…
chr01	2812394	T	C	23316.6	0/0	0/0	1/1	0/0	0/0	1/1	1/1	1/1	0/0	1/1	0/0	1/1	1/1	1/1	0/0	0/0	0/0	0/0	0/0	1/1	0/0	0/0	0/0	0/0	C|missense_variant|MODERATE|OS01G0152000|OS01G0152000|transcript|OS01T0152000-01|protein_coding|2/3|c.1055T>C|p.Ile352Thr|1962/4485|1055/3198|352/1065||,C|3_prime_UTR_variant|MODIFIER|OS01G0152050|OS01G0152050|transcript|OS01T0152050-00|protein_coding|2/2|c.*382A>G|||||382|,C|upstream_gene_variant|MODIFIER|EPlOSAG00000013645|EPlOSAG00000013645|transcript|EPlOSAT00000015033|lincRNA||n.-1217T>C||||…
chr01	2812408	A	G	25443.6	0/0	0/0	1|1	0/0	0/0	1|1	1|1	1|1	0/0	1|1	0/0	1|1	1|1	1|1	0/0	0/0	0/0	0/0	0/0	1|1	0/0	0/0	0/0	0/0	G|missense_variant|MODERATE|OS01G0152000|OS01G0152000|transcript|OS01T0152000-01|protein_coding|2/3|c.1069A>G|p.Asn357Asp|1976/4485|1069/3198|357/1065||,G|3_prime_UTR_variant|MODIFIER|OS01G0152050|OS01G0152050|transcript|OS01T0152050-00|protein_coding|2/2|c.*368T>C|||||368|,G|upstream_gene_variant|MODIFIER|EPlOSAG00000013645|EPlOSAG00000013645|transcript|EPlOSAT00000015033|lincRNA||n.-1203A>G||||…
chr01	2812445	C	T	22881.6	0/0	0/0	1/1	0/0	0/0	1/1	1/1	1/1	0/0	1/1	0/0	1/1	1/1	1/1	0/0	0/0	0/0	0/0	0/0	1/1	0/0	0/0	0/0	0/0	T|missense_variant|MODERATE|OS01G0152000|OS01G0152000|transcript|OS01T0152000-01|protein_coding|2/3|c.1106C>T|p.Ala369Val|2013/4485|1106/3198|369/1065||,T|3_prime_UTR_variant|MODIFIER|OS01G0152050|OS01G0152050|transcript|OS01T0152050-00|protein_coding|2/2|c.*331G>A|||||331|,T|upstream_gene_variant|MODIFIER|EPlOSAG00000013645|EPlOSAG00000013645|transcript|EPlOSAT00000015033|lincRNA||n.-1166C>T||||…
chr01	2812457	A	C	22202.6	0/0	0/0	1/1	0/0	0/0	1/1	1/1	1/1	0/0	1/1	0/0	1/1	1/1	1/1	0/0	0/0	0/0	0/0	0/0	1/1	0/0	0/0	0/0	0/0	C|missense_variant|MODERATE|OS01G0152000|OS01G0152000|transcript|OS01T0152000-01|protein_coding|2/3|c.1118A>C|p.Lys373Thr|2025/4485|1118/3198|373/1065||,C|3_prime_UTR_variant|MODIFIER|OS01G0152050|OS01G0152050|transcript|OS01T0152050-00|protein_coding|2/2|c.*319T>G|||||319|,C|upstream_gene_variant|MODIFIER|EPlOSAG00000013645|EPlOSAG00000013645|transcript|EPlOSAT00000015033|lincRNA||n.-1154A>C||||…
chr01	2812469	A	C	22162.6	0/0	0/0	1/1	0/0	0/0	1/1	1/1	1/1	0/0	1/1	0/0	1/1	1/1	1/1	0/0	0/0	0/0	0/0	0/0	1/1	0/0	0/0	0/0	0/0	C|missense_variant|MODERATE|OS01G0152000|OS01G0152000|transcript|OS01T0152000-01|protein_coding|2/3|c.1130A>C|p.Lys377Thr|2037/4485|1130/3198|377/1065||,C|3_prime_UTR_variant|MODIFIER|OS01G0152050|OS01G0152050|transcript|OS01T0152050-00|protein_coding|2/2|c.*307T>G|||||307|,C|upstream_gene_variant|MODIFIER|EPlOSAG00000013645|EPlOSAG00000013645|transcript|EPlOSAT00000015033|lincRNA||n.-1142A>C||||…
chr01	2812627	A	T	22946.6	0/0	0/0	1/1	0/0	0/0	1/1	1/1	1/1	0/0	1/1	0/0	1/1	1/1	1/1	0/0	0/0	0/0	0/0	0/0	1/1	0/0	0/0	0/0	0/0	T|missense_variant|MODERATE|OS01G0152000|OS01G0152000|transcript|OS01T0152000-01|protein_coding|2/3|c.1288A>T|p.Asn430Tyr|2195/4485|1288/3198|430/1065||,T|3_prime_UTR_variant|MODIFIER|OS01G0152050|OS01G0152050|transcript|OS01T0152050-00|protein_coding|2/2|c.*149T>A|||||149|,T|upstream_gene_variant|MODIFIER|EPlOSAG00000013645|EPlOSAG00000013645|transcript|EPlOSAT00000015033|lincRNA||n.-984A>T|||||…
chr01	2812744	A	G	26295.6	0/0	0/0	1|1	0/0	0/0	1|1	1|1	1|1	0/0	1|1	0/0	1|1	1|1	1|1	0/0	0/0	0/0	0/0	0/0	1|1	0/0	0/0	0/0	0/0	G|missense_variant|MODERATE|OS01G0152000|OS01G0152000|transcript|OS01T0152000-01|protein_coding|2/3|c.1405A>G|p.Lys469Glu|2312/4485|1405/3198|469/1065||,G|3_prime_UTR_variant|MODIFIER|OS01G0152050|OS01G0152050|transcript|OS01T0152050-00|protein_coding|2/2|c.*32T>C|||||32|,G|upstream_gene_variant|MODIFIER|EPlOSAG00000013645|EPlOSAG00000013645|transcript|EPlOSAT00000015033|lincRNA||n.-867A>G|||||86…
chr01	2812909	A	G	24986.6	0/0	0/0	1/1	0/0	0/0	1/1	1/1	1/1	0/0	1/1	0/0	1/1	1/1	1/1	0/0	0/0	0/0	0/0	0/0	1/1	0/0	0/0	0/0	0/0	G|missense_variant|MODERATE|OS01G0152000|OS01G0152000|transcript|OS01T0152000-01|protein_coding|2/3|c.1570A>G|p.Ile524Val|2477/4485|1570/3198|524/1065||,G|missense_variant|MODERATE|OS01G0152050|OS01G0152050|transcript|OS01T0152050-00|protein_coding|2/2|c.197T>C|p.Ile66Thr|1645/3056|197/330|66/109||,G|upstream_gene_variant|MODIFIER|EPlOSAG00000013645|EPlOSAG00000013645|transcript|EPlOSAT0000001503…
chr01	2812980	T	G	23821.6	0/0	0/0	1/1	0/0	0/0	1/1	1/1	1/1	0/0	1/1	0/0	1/1	1/1	1/1	0/0	0/0	0/0	0/0	0/0	1/1	0/0	0/0	0/0	0/0	G|missense_variant|MODERATE|OS01G0152050|OS01G0152050|transcript|OS01T0152050-00|protein_coding|2/2|c.126A>C|p.Lys42Asn|1574/3056|126/330|42/109||,G|synonymous_variant|LOW|OS01G0152000|OS01G0152000|transcript|OS01T0152000-01|protein_coding|2/3|c.1641T>G|p.Leu547Leu|2548/4485|1641/3198|547/1065||,G|upstream_gene_variant|MODIFIER|EPlOSAG00000013645|EPlOSAG00000013645|transcript|EPlOSAT00000015033|l…
chr01	2813027	G	A	22504.6	0/0	0/0	1/1	0/0	0/0	1/1	1/1	1/1	0/0	1/1	0/0	1/1	1/1	1/1	0/0	0/0	0/0	0/0	0/0	1/1	0/0	0/0	0/0	0/0	A|missense_variant|MODERATE|OS01G0152000|OS01G0152000|transcript|OS01T0152000-01|protein_coding|2/3|c.1688G>A|p.Gly563Glu|2595/4485|1688/3198|563/1065||,A|missense_variant|MODERATE|OS01G0152050|OS01G0152050|transcript|OS01T0152050-00|protein_coding|2/2|c.79C>T|p.Pro27Ser|1527/3056|79/330|27/109||,A|upstream_gene_variant|MODIFIER|EPlOSAG00000013645|EPlOSAG00000013645|transcript|EPlOSAT00000015033|…
chr01	2813330	T	C	25819.6	0/0	0/0	1/1	0/0	0/0	1/1	1/1	1/1	0/0	1/1	0/0	1/1	1/1	1/1	0/0	0/0	0/0	0/0	0/0	1/1	0/0	0/0	0/0	0/0	C|missense_variant|MODERATE|OS01G0152000|OS01G0152000|transcript|OS01T0152000-01|protein_coding|2/3|c.1991T>C|p.Met664Thr|2898/4485|1991/3198|664/1065||,C|5_prime_UTR_variant|MODIFIER|OS01G0152050|OS01G0152050|transcript|OS01T0152050-00|protein_coding|2/2|c.-225A>G|||||225|,C|upstream_gene_variant|MODIFIER|EPlOSAG00000013645|EPlOSAG00000013645|transcript|EPlOSAT00000015033|lincRNA||n.-281T>C|||||…
chr01	2813348	G	T	24420.6	0/0	0/0	1/1	0/0	0/0	1/1	1/1	1/1	0/0	1/1	0/0	1/1	1/1	1/1	0/0	0/0	0/0	0/0	0/0	1/1	0/0	0/0	0/0	0/0	T|missense_variant|MODERATE|OS01G0152000|OS01G0152000|transcript|OS01T0152000-01|protein_coding|2/3|c.2009G>T|p.Arg670Ile|2916/4485|2009/3198|670/1065||,T|5_prime_UTR_variant|MODIFIER|OS01G0152050|OS01G0152050|transcript|OS01T0152050-00|protein_coding|2/2|c.-243C>A|||||243|,T|upstream_gene_variant|MODIFIER|EPlOSAG00000013645|EPlOSAG00000013645|transcript|EPlOSAT00000015033|lincRNA||n.-263G>T|||||…
chr01	2813447	G	A	21420.6	0/0	0/0	1/1	0/0	0/0	1/1	1/1	1/1	0/0	1/1	0/0	1/1	1/1	1/1	0/0	0/0	0/0	0/0	0/0	1/1	0/0	0/0	0/0	0/0	A|missense_variant|MODERATE|OS01G0152000|OS01G0152000|transcript|OS01T0152000-01|protein_coding|2/3|c.2108G>A|p.Arg703His|3015/4485|2108/3198|703/1065||,A|5_prime_UTR_premature_start_codon_gain_variant|LOW|OS01G0152050|OS01G0152050|transcript|OS01T0152050-00|protein_coding|2/2|c.-342C>T||||||,A|5_prime_UTR_variant|MODIFIER|OS01G0152050|OS01G0152050|transcript|OS01T0152050-00|protein_coding|2/2|c.…
chr01	2813569	C	A	22793.6	0/0	0/0	1/1	0/0	0/0	1/1	1/1	1/1	0/0	1/1	0/0	1/1	1/1	1/1	0/0	0/0	0/0	0/0	0/0	1/1	0/0	0/0	0/0	0/0	A|missense_variant|MODERATE|OS01G0152000|OS01G0152000|transcript|OS01T0152000-01|protein_coding|2/3|c.2230C>A|p.Leu744Ile|3137/4485|2230/3198|744/1065||,A|5_prime_UTR_variant|MODIFIER|OS01G0152050|OS01G0152050|transcript|OS01T0152050-00|protein_coding|2/2|c.-464G>T|||||464|,A|upstream_gene_variant|MODIFIER|EPlOSAG00000013645|EPlOSAG00000013645|transcript|EPlOSAT00000015033|lincRNA||n.-42C>A|||||4…
chr01	2813605	A	G	23191.6	0/0	0/0	1/1	0/0	0/0	1/1	1/1	1/1	0/0	1/1	0/0	1/1	1/1	1/1	0/0	0/0	0/0	0/0	0/0	1/1	0/0	0/0	0/0	0/0	G|missense_variant|MODERATE|OS01G0152000|OS01G0152000|transcript|OS01T0152000-01|protein_coding|2/3|c.2266A>G|p.Thr756Ala|3173/4485|2266/3198|756/1065||,G|5_prime_UTR_variant|MODIFIER|OS01G0152050|OS01G0152050|transcript|OS01T0152050-00|protein_coding|2/2|c.-500T>C|||||500|,G|upstream_gene_variant|MODIFIER|EPlOSAG00000013645|EPlOSAG00000013645|transcript|EPlOSAT00000015033|lincRNA||n.-6A>G|||||6|…
chr01	2813626	G	A	23214.6	0/0	0/0	1/1	0/0	0/0	1/1	1/1	1/1	0/0	1/1	0/0	1/1	1/1	1/1	0/0	0/0	0/0	0/0	0/0	1/1	0/0	0/0	0/0	0/0	A|missense_variant|MODERATE|OS01G0152000|OS01G0152000|transcript|OS01T0152000-01|protein_coding|2/3|c.2287G>A|p.Val763Ile|3194/4485|2287/3198|763/1065||,A|5_prime_UTR_variant|MODIFIER|OS01G0152050|OS01G0152050|transcript|OS01T0152050-00|protein_coding|2/2|c.-521C>T|||||521|,A|downstream_gene_variant|MODIFIER|OS01G0152100|OS01G0152100|transcript|OS01T0152100-00|protein_coding||c.*1549C>T|||||1522|…
chr01	2813657	G	A	22486.6	0/0	0/0	1/1	0/0	0/0	1/1	1/1	1/1	0/0	1/1	0/0	1/1	1/1	1/1	0/0	0/0	0/0	0/0	0/0	1/1	0/0	0/0	0/0	0/0	A|missense_variant|MODERATE|OS01G0152000|OS01G0152000|transcript|OS01T0152000-01|protein_coding|2/3|c.2318G>A|p.Arg773Gln|3225/4485|2318/3198|773/1065||,A|5_prime_UTR_premature_start_codon_gain_variant|LOW|OS01G0152050|OS01G0152050|transcript|OS01T0152050-00|protein_coding|2/2|c.-552C>T||||||,A|5_prime_UTR_variant|MODIFIER|OS01G0152050|OS01G0152050|transcript|OS01T0152050-00|protein_coding|2/2|c.…
chr01	2813680	C	G	21757.6	0/0	0/0	1/1	0/0	0/0	1/1	1/1	1/1	0/0	1/1	0/0	1/1	1/1	1/1	0/0	0/0	0/0	0/0	0/0	1/1	0/0	0/0	0/0	0/0	G|missense_variant|MODERATE|OS01G0152000|OS01G0152000|transcript|OS01T0152000-01|protein_coding|2/3|c.2341C>G|p.Leu781Val|3248/4485|2341/3198|781/1065||,G|5_prime_UTR_variant|MODIFIER|OS01G0152050|OS01G0152050|transcript|OS01T0152050-00|protein_coding|2/2|c.-575G>C|||||575|,G|downstream_gene_variant|MODIFIER|EPlOSAG00000013645|EPlOSAG00000013645|transcript|EPlOSAT00000015033|lincRNA||n.*29C>G||||…
chr01	2813694	C	G	20996.6	0/0	0/0	1/1	0/0	0/0	1/1	1/1	1/1	0/0	1/1	0/0	1/1	1/1	1/1	0/0	0/0	0/0	0/0	0/0	1/1	0/0	0/0	0/0	0/0	G|missense_variant|MODERATE|OS01G0152000|OS01G0152000|transcript|OS01T0152000-01|protein_coding|2/3|c.2355C>G|p.Asp785Glu|3262/4485|2355/3198|785/1065||,G|5_prime_UTR_variant|MODIFIER|OS01G0152050|OS01G0152050|transcript|OS01T0152050-00|protein_coding|2/2|c.-589G>C|||||589|,G|downstream_gene_variant|MODIFIER|EPlOSAG00000013645|EPlOSAG00000013645|transcript|EPlOSAT00000015033|lincRNA||n.*43C>G||||…
chr01	2813852	C	T	23520.6	0/0	0/0	1/1	0/0	0/0	1/1	1/1	1/1	0/0	1/1	0/0	1/1	1/1	1/1	0/0	0/0	0/0	0/0	0/0	1/1	0/0	0/0	0/0	0/0	T|missense_variant|MODERATE|OS01G0152000|OS01G0152000|transcript|OS01T0152000-01|protein_coding|2/3|c.2513C>T|p.Ala838Val|3420/4485|2513/3198|838/1065||,T|5_prime_UTR_variant|MODIFIER|OS01G0152050|OS01G0152050|transcript|OS01T0152050-00|protein_coding|2/2|c.-747G>A|||||747|,T|downstream_gene_variant|MODIFIER|EPlOSAG00000013645|EPlOSAG00000013645|transcript|EPlOSAT00000015033|lincRNA||n.*201C>T|||…
chr01	2814402	A	T	20492.6	0/0	0/0	1/1	0/0	0/0	1/1	1/1	1/1	0/0	1/1	0/0	1/1	1/1	1/1	0/0	0/0	0/0	0/0	0/0	1/1	0/0	0/0	0/0	0/0	T|missense_variant|MODERATE|OS01G0152000|OS01G0152000|transcript|OS01T0152000-01|protein_coding|3/3|c.2963A>T|p.His988Leu|3870/4485|2963/3198|988/1065||,T|downstream_gene_variant|MODIFIER|EPlOSAG00000013645|EPlOSAG00000013645|transcript|EPlOSAT00000015033|lincRNA||n.*751A>T|||||751|,T|downstream_gene_variant|MODIFIER|OS01G0152100|OS01G0152100|transcript|OS01T0152100-00|protein_coding||c.*773T>A||…
chr01	2814498	A	G	21857.6	0/0	0/0	1/1	0/0	0/0	1/1	1/1	1/1	0/0	1/1	0/0	1/1	1/1	1/1	0/0	0/0	0/0	0/0	0/0	1/1	0/0	0/0	0/0	0/0	G|missense_variant|MODERATE|OS01G0152000|OS01G0152000|transcript|OS01T0152000-01|protein_coding|3/3|c.3059A>G|p.Lys1020Arg|3966/4485|3059/3198|1020/1065||,G|downstream_gene_variant|MODIFIER|EPlOSAG00000013645|EPlOSAG00000013645|transcript|EPlOSAT00000015033|lincRNA||n.*847A>G|||||847|,G|downstream_gene_variant|MODIFIER|OS01G0152100|OS01G0152100|transcript|OS01T0152100-00|protein_coding||c.*677T>C…
chr01	2814561	T	A	23654.6	0/0	0/0	1/1	0/0	0/0	1/1	1/1	1/1	0/0	1/1	0/0	1/1	1/1	1/1	0/0	0/0	0/0	0/0	0/0	1/1	0/0	0/0	0/0	0/0	A|missense_variant|MODERATE|OS01G0152000|OS01G0152000|transcript|OS01T0152000-01|protein_coding|3/3|c.3122T>A|p.Leu1041Gln|4029/4485|3122/3198|1041/1065||,A|downstream_gene_variant|MODIFIER|EPlOSAG00000013645|EPlOSAG00000013645|transcript|EPlOSAT00000015033|lincRNA||n.*910T>A|||||910|,A|downstream_gene_variant|MODIFIER|OS01G0152100|OS01G0152100|transcript|OS01T0152100-00|protein_coding||c.*614A>T…
chr01	2815188	G	T	7118.51	0/0	0/0	1/1	0/0	0/0	1/1	1/1	1/1	0/0	1/1	0/0	1/1	1/1	1/1	0/0	0/0	0/0	0/0	0/0	1/1	0/0	0/0	0/0	0/0	T|missense_variant|MODERATE|OS01G0152100|OS01G0152100|transcript|OS01T0152100-00|protein_coding|1/1|c.1367C>A|p.Thr456Lys|1367/1407|1367/1380|456/459||,T|downstream_gene_variant|MODIFIER|OS01G0152000|OS01G0152000|transcript|OS01T0152000-01|protein_coding||c.*551G>T|||||171|,T|downstream_gene_variant|MODIFIER|EPlOSAG00000013645|EPlOSAG00000013645|transcript|EPlOSAT00000015033|lincRNA||n.*1537G>T||…
chr01	2815209	C	T	9729.57	0/0	0/0	1/1	0/0	0/0	1/1	1/1	1/1	0/0	1/1	0/0	1/1	1/1	1/1	0/0	0/0	0/0	0/0	0/0	1/1	0/0	0/0	0/0	0/0	T|missense_variant|MODERATE|OS01G0152100|OS01G0152100|transcript|OS01T0152100-00|protein_coding|1/1|c.1346G>A|p.Gly449Asp|1346/1407|1346/1380|449/459||,T|downstream_gene_variant|MODIFIER|OS01G0152000|OS01G0152000|transcript|OS01T0152000-01|protein_coding||c.*572C>T|||||192|,T|downstream_gene_variant|MODIFIER|EPlOSAG00000013645|EPlOSAG00000013645|transcript|EPlOSAT00000015033|lincRNA||n.*1558C>T||…
chr01	2815281	C	T	15001.6	0/0	0/0	1/1	0/0	0/0	1/1	1/1	1/1	0/0	1/1	0/0	1/1	1/1	1/1	0/0	0/0	0/0	0/0	0/0	1/1	0/0	0/0	0/0	0/0	T|missense_variant|MODERATE|OS01G0152100|OS01G0152100|transcript|OS01T0152100-00|protein_coding|1/1|c.1274G>A|p.Gly425Asp|1274/1407|1274/1380|425/459||,T|downstream_gene_variant|MODIFIER|OS01G0152000|OS01G0152000|transcript|OS01T0152000-01|protein_coding||c.*644C>T|||||264|,T|downstream_gene_variant|MODIFIER|EPlOSAG00000013645|EPlOSAG00000013645|transcript|EPlOSAT00000015033|lincRNA||n.*1630C>T||…
chr01	2815314	C	T	15803.6	0/0	0/0	1/1	0/0	0/0	1/1	1/1	1/1	0/0	1/1	0/0	1/1	1/1	1/1	0/0	0/0	0/0	0/0	0/0	1/1	0/0	0/0	0/0	0/0	T|missense_variant|MODERATE|OS01G0152100|OS01G0152100|transcript|OS01T0152100-00|protein_coding|1/1|c.1241G>A|p.Arg414Lys|1241/1407|1241/1380|414/459||,T|downstream_gene_variant|MODIFIER|OS01G0152000|OS01G0152000|transcript|OS01T0152000-01|protein_coding||c.*677C>T|||||297|,T|downstream_gene_variant|MODIFIER|EPlOSAG00000013645|EPlOSAG00000013645|transcript|EPlOSAT00000015033|lincRNA||n.*1663C>T||…
chr01	2815390	T	C	18346.6	0/0	0/0	1/1	0/0	0/0	1/1	1/1	1/1	0/0	1/1	0/0	1/1	1/1	1/1	0/0	0/0	0/0	0/0	0/0	1/1	0/0	0/0	0/0	0/0	C|missense_variant|MODERATE|OS01G0152100|OS01G0152100|transcript|OS01T0152100-00|protein_coding|1/1|c.1165A>G|p.Met389Val|1165/1407|1165/1380|389/459||,C|downstream_gene_variant|MODIFIER|OS01G0152000|OS01G0152000|transcript|OS01T0152000-01|protein_coding||c.*753T>C|||||373|,C|downstream_gene_variant|MODIFIER|EPlOSAG00000013645|EPlOSAG00000013645|transcript|EPlOSAT00000015033|lincRNA||n.*1739T>C||…
chr01	2815481	G	GCCGCCGTCGCCA	25296.6	0/0	0/0	1/1	0/0	0/0	1/1	1/1	1/1	0/0	1/1	0/0	1/1	1/1	1/1	0/0	0/0	0/0	0/0	0/0	1/1	0/0	0/0	0/0	0/0	GCCGCCGTCGCCA|disruptive_inframe_insertion|MODERATE|OS01G0152100|OS01G0152100|transcript|OS01T0152100-00|protein_coding|1/1|c.1073_1074insTGGCGACGGCGG|p.Asp358_Asp359insGlyAspGlyGly|1073/1407|1073/1380|358/459||,GCCGCCGTCGCCA|downstream_gene_variant|MODIFIER|OS01G0152000|OS01G0152000|transcript|OS01T0152000-01|protein_coding||c.*844_*845insCCGCCGTCGCCA|||||465|,GCCGCCGTCGCCA|downstream_gene_varia…
chr01	2815831	AC	A	23588.6	0/0	0/0	1/1	0/0	0/0	1/1	1/1	1/1	0/0	1/1	0/0	1/1	1/1	1/1	0/0	0/0	0/0	0/0	0/0	1/1	0/0	0/0	0/0	0/0	A|frameshift_variant|HIGH|OS01G0152100|OS01G0152100|transcript|OS01T0152100-00|protein_coding|1/1|c.723delG|p.Tyr242fs|723/1407|723/1380|241/459||,A|downstream_gene_variant|MODIFIER|OS01G0152000|OS01G0152000|transcript|OS01T0152000-01|protein_coding||c.*1195delC|||||815|,A|downstream_gene_variant|MODIFIER|EPlOSAG00000009842|EPlOSAG00000009842|transcript|EPlOSAT00000011230|lincRNA||n.*1047delG||||…
chr01	2816154	C	G	19109.6	0/0	0/0	1/1	0/0	0/0	1/1	1/1	1/1	0/0	1/1	0/0	1/1	1/1	1/1	0/0	0/0	0/0	0/0	0/0	1/1	0/0	0/0	0/0	0/0	G|missense_variant|MODERATE|OS01G0152100|OS01G0152100|transcript|OS01T0152100-00|protein_coding|1/1|c.401G>C|p.Ser134Thr|401/1407|401/1380|134/459||,G|downstream_gene_variant|MODIFIER|OS01G0152000|OS01G0152000|transcript|OS01T0152000-01|protein_coding||c.*1517C>G|||||1137|,G|downstream_gene_variant|MODIFIER|EPlOSAG00000009842|EPlOSAG00000009842|transcript|EPlOSAT00000011230|lincRNA||n.*725G>C||||…
chr01	2816253	A	C	18131.6	0/0	0/0	1/1	0/0	0/0	1/1	1/1	1/1	0/0	1/1	0/0	1/1	1/1	1/1	0/0	0/0	0/0	0/0	0/0	1/1	0/0	0/0	0/0	0/0	C|missense_variant|MODERATE|OS01G0152100|OS01G0152100|transcript|OS01T0152100-00|protein_coding|1/1|c.302T>G|p.Leu101Arg|302/1407|302/1380|101/459||,C|downstream_gene_variant|MODIFIER|OS01G0152000|OS01G0152000|transcript|OS01T0152000-01|protein_coding||c.*1616A>C|||||1236|,C|downstream_gene_variant|MODIFIER|EPlOSAG00000009842|EPlOSAG00000009842|transcript|EPlOSAT00000011230|lincRNA||n.*626T>G||||…
chr01	2816328	C	T	20080.6	0/0	0/0	1/1	0/0	0/0	1|1	1|1	1|1	0/0	1|1	0/0	1|1	1/1	1|1	0/0	0/0	0/0	0/0	0/0	1|1	0/0	0/0	0/0	0/0	T|missense_variant|MODERATE|OS01G0152100|OS01G0152100|transcript|OS01T0152100-00|protein_coding|1/1|c.227G>A|p.Ser76Asn|227/1407|227/1380|76/459||,T|downstream_gene_variant|MODIFIER|OS01G0152000|OS01G0152000|transcript|OS01T0152000-01|protein_coding||c.*1691C>T|||||1311|,T|downstream_gene_variant|MODIFIER|EPlOSAG00000009842|EPlOSAG00000009842|transcript|EPlOSAT00000011230|lincRNA||n.*551G>A|||||5…
chr01	2816329	T	C	20372	0/0	0/0	1/1	0/0	0/0	1|1	1|1	1|1	0/0	1|1	0/0	1|1	.	1|1	0/0	0/0	0/0	0/0	0/0	1|1	0/0	0/0	0/0	0/0	C|missense_variant|MODERATE|OS01G0152100|OS01G0152100|transcript|OS01T0152100-00|protein_coding|1/1|c.226A>G|p.Ser76Gly|226/1407|226/1380|76/459||,C|downstream_gene_variant|MODIFIER|OS01G0152000|OS01G0152000|transcript|OS01T0152000-01|protein_coding||c.*1692T>C|||||1312|,C|downstream_gene_variant|MODIFIER|EPlOSAG00000009842|EPlOSAG00000009842|transcript|EPlOSAT00000011230|lincRNA||n.*550A>G|||||5…
chr01	2816484	T	C	6485.79	0/0	0/0	1|1	0/0	0/0	1/1	1|1	1/1	0/0	1/1	0/0	1/1	1/1	1|1	0/0	0/0	0/0	0/0	0/0	1/1	0/0	0/0	0/0	0/0	C|missense_variant|MODERATE|OS01G0152100|OS01G0152100|transcript|OS01T0152100-00|protein_coding|1/1|c.71A>G|p.Tyr24Cys|71/1407|71/1380|24/459||,C|downstream_gene_variant|MODIFIER|OS01G0152000|OS01G0152000|transcript|OS01T0152000-01|protein_coding||c.*1847T>C|||||1467|,C|downstream_gene_variant|MODIFIER|EPlOSAG00000009842|EPlOSAG00000009842|transcript|EPlOSAT00000011230|lincRNA||n.*395A>G|||||395|…
chr01	2816505	GA	G	2473.17	0/0	0/0	1|1	0/0	0/0	1|1	1|1	0|0	0/0	1|1	0/0	1|1	1|1	1|1	0/0	0/0	0/0	0/0	0/0	1|1	0/0	0/0	0/0	0/0	G|frameshift_variant|HIGH|OS01G0152100|OS01G0152100|transcript|OS01T0152100-00|protein_coding|1/1|c.49delT|p.Ser17fs|49/1407|49/1380|17/459||,G|downstream_gene_variant|MODIFIER|OS01G0152000|OS01G0152000|transcript|OS01T0152000-01|protein_coding||c.*1869delA|||||1489|,G|downstream_gene_variant|MODIFIER|EPlOSAG00000009842|EPlOSAG00000009842|transcript|EPlOSAT00000011230|lincRNA||n.*373delT|||||373|…
chr01	2816507	GTGT	G	2473.61	0/0	0/0	1|1	0/0	0/0	1|1	1|1	0|0	0/0	1|1	0/0	1|1	1|1	1|1	0/0	0/0	0/0	0/0	0/0	1|1	0/0	0/0	0/0	0/0	G|disruptive_inframe_deletion|MODERATE|OS01G0152100|OS01G0152100|transcript|OS01T0152100-00|protein_coding|1/1|c.45_47delACA|p.His16del|47/1407|45/1380|15/459||,G|downstream_gene_variant|MODIFIER|OS01G0152000|OS01G0152000|transcript|OS01T0152000-01|protein_coding||c.*1871_*1873delTGT|||||1491|,G|downstream_gene_variant|MODIFIER|EPlOSAG00000009842|EPlOSAG00000009842|transcript|EPlOSAT00000011230|l…
chr01	2816527	TTGGGGGG	T,*	285.76	0/0	0/0	2|2	0/0	0/0	2/2	./.	./.	0/0	1/1	0/0	2/2	1/1	2|2	0/0	0/0	0/0	0/0	0/0	1/1	0/0	0/0	0/0	0/0	T|frameshift_variant|HIGH|OS01G0152100|OS01G0152100|transcript|OS01T0152100-00|protein_coding|1/1|c.21_27delCCCCCCA|p.His7fs|27/1407|21/1380|7/459||,T|downstream_gene_variant|MODIFIER|OS01G0152000|OS01G0152000|transcript|OS01T0152000-01|protein_coding||c.*1891_*1897delTGGGGGG|||||1511|,T|downstream_gene_variant|MODIFIER|EPlOSAG00000009842|EPlOSAG00000009842|transcript|EPlOSAT00000011230|lincRNA||…
chr01	2816534	G	*,T	1828.11	0/0	0/0	2|2	0/0	0/0	2/2	./.	./.	0/0	1/1	0/0	2/2	1/1	2|2	0/0	0/0	0/0	0/0	0/0	1/1	0/0	0/0	0/0	0/0	T|missense_variant|MODERATE|OS01G0152100|OS01G0152100|transcript|OS01T0152100-00|protein_coding|1/1|c.21C>A|p.His7Gln|21/1407|21/1380|7/459||,T|downstream_gene_variant|MODIFIER|OS01G0152000|OS01G0152000|transcript|OS01T0152000-01|protein_coding||c.*1897G>T|||||1517|,T|downstream_gene_variant|MODIFIER|EPlOSAG00000009842|EPlOSAG00000009842|transcript|EPlOSAT00000011230|lincRNA||n.*345C>A|||||345|,T…
chr01	2817641	ATCAATTAAT	A	2308.41	0/0	0/0	1/1	0/0	0/0	1/1	1/1	1/1	0/0	1/1	0/0	1/1	1/1	1/1	0/0	0/0	0/0	0/0	0/0	1/1	0/0	0/0	0/0	0/0	A|frameshift_variant&stop_lost&splice_region_variant|HIGH|OS01G0152200|OS01G0152200|transcript|OS01T0152200-00|protein_coding|1/1|c.1248_*8delATTAATTGA|p.Ter416fs||1248/1248|416/415||,A|upstream_gene_variant|MODIFIER|OS01G0152100|OS01G0152100|transcript|OS01T0152100-00|protein_coding||c.-1096_-1088delATTAATTGA|||||1088|,A|upstream_gene_variant|MODIFIER|EPlOSAG00000009842|EPlOSAG00000009842|transc…
chr01	2817678	GCTGCATAGAGC	G	800.56	0/0	0/0	./.	0/0	0/0	./.	1|1	1|1	0/0	./.	0/0	./.	1|1	1|1	0/0	0/0	0/0	0/0	0/0	./.	0/0	0/0	0/0	0/0	G|frameshift_variant|HIGH|OS01G0152200|OS01G0152200|transcript|OS01T0152200-00|protein_coding|1/1|c.1209_1219delGCTCTATGCAG|p.Trp403fs|1219/1248|1209/1248|403/415||,G|upstream_gene_variant|MODIFIER|OS01G0152100|OS01G0152100|transcript|OS01T0152100-00|protein_coding||c.-1135_-1125delGCTCTATGCAG|||||1125|,G|upstream_gene_variant|MODIFIER|EPlOSAG00000009842|EPlOSAG00000009842|transcript|EPlOSAT00000…
chr01	2817898	T	G	15011.6	0/0	0/0	1/1	0/0	0/0	1/1	1/1	1/1	0/0	1/1	0/0	1/1	1/1	1/1	0/0	0/0	0/0	0/0	0/0	1/1	0/0	0/0	0/0	0/0	G|missense_variant|MODERATE|OS01G0152200|OS01G0152200|transcript|OS01T0152200-00|protein_coding|1/1|c.1000A>C|p.Met334Leu|1000/1248|1000/1248|334/415||,G|upstream_gene_variant|MODIFIER|OS01G0152100|OS01G0152100|transcript|OS01T0152100-00|protein_coding||c.-1344A>C|||||1344|,G|upstream_gene_variant|MODIFIER|EPlOSAG00000009842|EPlOSAG00000009842|transcript|EPlOSAT00000011230|lincRNA||n.-950A>C|||||…
chr01	2818087	C	G	15095.6	0/0	0/0	1/1	0/0	0/0	1/1	1/1	1/1	0/0	1/1	0/0	1/1	1/1	1/1	0/0	0/0	0/0	0/0	0/0	1/1	0/0	0/0	0/0	0/0	G|missense_variant|MODERATE|OS01G0152200|OS01G0152200|transcript|OS01T0152200-00|protein_coding|1/1|c.811G>C|p.Gly271Arg|811/1248|811/1248|271/415||,G|upstream_gene_variant|MODIFIER|OS01G0152100|OS01G0152100|transcript|OS01T0152100-00|protein_coding||c.-1533G>C|||||1533|,G|upstream_gene_variant|MODIFIER|EPlOSAG00000009842|EPlOSAG00000009842|transcript|EPlOSAT00000011230|lincRNA||n.-1139G>C|||||11…
chr01	2818133	C	CGTGGCT	5586.18	0/0	0/0	1/1	0/0	0/0	1/1	1/1	1/1	0/0	1/1	0/0	1/1	1/1	1/1	0/0	0/0	0/0	0/0	0/0	1/1	0/0	0/0	0/0	0/0	CGTGGCT|disruptive_inframe_insertion|MODERATE|OS01G0152200|OS01G0152200|transcript|OS01T0152200-00|protein_coding|1/1|c.759_764dupAGCCAC|p.Thr255_Ala256insAlaThr|764/1248|764/1248|255/415||,CGTGGCT|upstream_gene_variant|MODIFIER|OS01G0152100|OS01G0152100|transcript|OS01T0152100-00|protein_coding||c.-1585_-1580dupAGCCAC|||||1580|,CGTGGCT|upstream_gene_variant|MODIFIER|EPlOSAG00000009842|EPlOSAG000…
chr01	2818395	A	G	21456.6	0/0	0/0	1/1	0/0	0/0	1/1	1/1	1/1	0/0	1/1	0/0	1/1	1/1	1/1	0/0	0/0	0/0	0/0	0/0	1/1	0/0	0/0	0/0	0/0	G|missense_variant|MODERATE|OS01G0152200|OS01G0152200|transcript|OS01T0152200-00|protein_coding|1/1|c.503T>C|p.Val168Ala|503/1248|503/1248|168/415||,G|upstream_gene_variant|MODIFIER|OS01G0152100|OS01G0152100|transcript|OS01T0152100-00|protein_coding||c.-1841T>C|||||1841|,G|upstream_gene_variant|MODIFIER|EPlOSAG00000009842|EPlOSAG00000009842|transcript|EPlOSAT00000011230|lincRNA||n.-1447T>C|||||14…
chr01	2818411	A	C	21599.6	0/0	0/0	1/1	0/0	0/0	1/1	1/1	1/1	0/0	1/1	0/0	1/1	1/1	1/1	0/0	0/0	0/0	0/0	0/0	1/1	0/0	0/0	0/0	0/0	C|missense_variant|MODERATE|OS01G0152200|OS01G0152200|transcript|OS01T0152200-00|protein_coding|1/1|c.487T>G|p.Phe163Val|487/1248|487/1248|163/415||,C|upstream_gene_variant|MODIFIER|OS01G0152100|OS01G0152100|transcript|OS01T0152100-00|protein_coding||c.-1857T>G|||||1857|,C|upstream_gene_variant|MODIFIER|EPlOSAG00000009842|EPlOSAG00000009842|transcript|EPlOSAT00000011230|lincRNA||n.-1463T>G|||||14…
chr01	2818421	T	TGCG	22711.6	0/0	0/0	1/1	0/0	0/0	1/1	1/1	1/1	0/0	1/1	0/0	1/1	1/1	1/1	0/0	0/0	0/0	0/0	0/0	1/1	0/0	0/0	0/0	0/0	TGCG|disruptive_inframe_insertion|MODERATE|OS01G0152200|OS01G0152200|transcript|OS01T0152200-00|protein_coding|1/1|c.476_477insCGC|p.Ala159dup|476/1248|476/1248|159/415||,TGCG|upstream_gene_variant|MODIFIER|OS01G0152100|OS01G0152100|transcript|OS01T0152100-00|protein_coding||c.-1868_-1867insCGC|||||1868|,TGCG|upstream_gene_variant|MODIFIER|EPlOSAG00000009842|EPlOSAG00000009842|transcript|EPlOSAT0…
chr01	2818527	T	C	20889.6	0/0	0/0	1/1	0/0	0/0	1/1	1/1	1/1	0/0	1/1	0/0	1/1	1/1	1/1	0/0	0/0	0/0	0/0	0/0	1/1	0/0	0/0	0/0	0/0	C|missense_variant|MODERATE|OS01G0152200|OS01G0152200|transcript|OS01T0152200-00|protein_coding|1/1|c.371A>G|p.Gln124Arg|371/1248|371/1248|124/415||,C|upstream_gene_variant|MODIFIER|OS01G0152100|OS01G0152100|transcript|OS01T0152100-00|protein_coding||c.-1973A>G|||||1973|,C|upstream_gene_variant|MODIFIER|EPlOSAG00000009842|EPlOSAG00000009842|transcript|EPlOSAT00000011230|lincRNA||n.-1579A>G|||||15…
chr01	2818590	A	G	25408.6	0/0	0/0	1|1	0/0	0/0	1|1	1|1	1|1	0/0	1|1	0/0	1|1	1|1	1|1	0/0	0/0	0/0	0/0	0/0	1|1	0/0	0/0	0/0	0/0	G|missense_variant|MODERATE|OS01G0152200|OS01G0152200|transcript|OS01T0152200-00|protein_coding|1/1|c.308T>C|p.Phe103Ser|308/1248|308/1248|103/415||,G|upstream_gene_variant|MODIFIER|EPlOSAG00000009842|EPlOSAG00000009842|transcript|EPlOSAT00000011230|lincRNA||n.-1642T>C|||||1642|,G|downstream_gene_variant|MODIFIER|H2B.10|OS01G0152300|transcript|OS01T0152300-00|protein_coding||c.*1645T>C|||||1484|,…
chr01	2818654	G	GA	24274.6	0/0	0/0	1|1	0/0	0/0	1|1	1|1	1|1	0/0	1|1	0/0	1|1	1|1	1|1	0/0	0/0	0/0	0/0	0/0	1|1	0/0	0/0	0/0	0/0	GA|frameshift_variant|HIGH|OS01G0152200|OS01G0152200|transcript|OS01T0152200-00|protein_coding|1/1|c.243_244insT|p.His82fs|243/1248|243/1248|81/415||,GA|upstream_gene_variant|MODIFIER|EPlOSAG00000009842|EPlOSAG00000009842|transcript|EPlOSAT00000011230|lincRNA||n.-1707_-1706insT|||||1707|,GA|downstream_gene_variant|MODIFIER|H2B.10|OS01G0152300|transcript|OS01T0152300-00|protein_coding||c.*1580_*15…
chr01	2818658	G	GT	24411.6	0/0	0/0	1|1	0/0	0/0	1|1	1|1	1|1	0/0	1|1	0/0	1|1	1|1	1|1	0/0	0/0	0/0	0/0	0/0	1|1	0/0	0/0	0/0	0/0	GT|frameshift_variant|HIGH|OS01G0152200|OS01G0152200|transcript|OS01T0152200-00|protein_coding|1/1|c.239_240insA|p.His82fs|239/1248|239/1248|80/415||,GT|upstream_gene_variant|MODIFIER|EPlOSAG00000009842|EPlOSAG00000009842|transcript|EPlOSAT00000011230|lincRNA||n.-1711_-1710insA|||||1711|,GT|downstream_gene_variant|MODIFIER|H2B.10|OS01G0152300|transcript|OS01T0152300-00|protein_coding||c.*1576_*15…
chr01	2818728	A	G	21318.6	0/0	0/0	1/1	0/0	0/0	1/1	1/1	1/1	0/0	1/1	0/0	1/1	1/1	1/1	0/0	0/0	0/0	0/0	0/0	1/1	0/0	0/0	0/0	0/0	G|missense_variant|MODERATE|OS01G0152200|OS01G0152200|transcript|OS01T0152200-00|protein_coding|1/1|c.170T>C|p.Leu57Pro|170/1248|170/1248|57/415||,G|upstream_gene_variant|MODIFIER|EPlOSAG00000009842|EPlOSAG00000009842|transcript|EPlOSAT00000011230|lincRNA||n.-1780T>C|||||1780|,G|downstream_gene_variant|MODIFIER|H2B.10|OS01G0152300|transcript|OS01T0152300-00|protein_coding||c.*1507T>C|||||1346|,G|…
chr01	2820614	A	G	19451.6	0/0	0/0	1/1	0/0	0/0	1/1	1/1	1/1	0/0	1/1	0/0	1/1	1/1	1/1	0/0	0/0	0/0	0/0	0/0	1/1	0/0	0/0	0/0	0/0	G|missense_variant|MODERATE|H2B.10|OS01G0152300|transcript|OS01T0152300-00|protein_coding|1/1|c.83T>C|p.Leu28Pro|131/671|83/462|28/153||,G|upstream_gene_variant|MODIFIER|OS01G0152050|OS01G0152050|transcript|OS01T0152050-00|protein_coding||c.-7509T>C|||||1061|,G|upstream_gene_variant|MODIFIER|OS01G0152200|OS01G0152200|transcript|OS01T0152200-00|protein_coding||c.-1717T>C|||||1717|
chr01	2830611	C	T	24183.6	0/0	0/0	1/1	0/0	0/0	1/1	1/1	1/1	0/0	1/1	0/0	1/1	1/1	1/1	0/0	0/0	0/0	0/0	0/0	1/1	0/0	0/0	0/0	0/0	T|missense_variant|MODERATE|OS01G0152600|OS01G0152600|transcript|OS01T0152600-00|protein_coding|1/2|c.287C>T|p.Pro96Leu|287/3153|287/3153|96/1050||,T|upstream_gene_variant|MODIFIER|OS01G0152500|OS01G0152500|transcript|OS01T0152500-00|protein_coding||c.-1681G>A|||||1681|
chr01	2831319	C	G	23537.6	0/0	0/0	1/1	0/0	0/0	1/1	1/1	1/1	0/0	1/1	0/0	1/1	1/1	1/1	0/0	0/0	0/0	0/0	0/0	1/1	0/0	0/0	0/0	0/0	G|missense_variant|MODERATE|OS01G0152600|OS01G0152600|transcript|OS01T0152600-00|protein_coding|1/2|c.995C>G|p.Ser332Trp|995/3153|995/3153|332/1050||
chr01	2841492	C	A	21185.6	0/0	0/0	1/1	0/0	0/0	1/1	1/1	1/1	0/0	1/1	0/0	1/1	1/1	1/1	0/0	0/0	0/0	0/0	0/0	1/1	0/0	0/0	0/0	0/0	A|missense_variant|MODERATE|OS01G0152800|OS01G0152800|transcript|OS01T0152800-01|protein_coding|1/2|c.1514C>A|p.Ser505Tyr|1559/3428|1514/3156|505/1051||,A|5_prime_UTR_variant|MODIFIER|OS01G0152850|OS01G0152850|transcript|OS01T0152850-00|protein_coding|2/2|c.-1023G>T|||||1023|WARNING_TRANSCRIPT_INCOMPLETE
chr01	2848159	A	G	24442.6	0/0	0/0	1/1	0/0	0/0	1/1	1/1	1/1	0/0	1/1	0/0	1/1	1/1	1/1	0/0	0/0	0/0	0/0	0/0	1/1	0/0	0/0	0/0	0/0	G|missense_variant|MODERATE|OS01G0152950|OS01G0152950|transcript|OS01T0152950-00|protein_coding|1/1|c.691T>C|p.Cys231Arg|691/1296|691/1296|231/431||,G|upstream_gene_variant|MODIFIER|OS01G0152951|OS01G0152951|transcript|OS01T0152951-00|protein_coding||c.-1001A>G|||||1001|
chr01	2848504	C	T	23572.6	0/0	0/0	1/1	0/0	0/0	1/1	1/1	1/1	0/0	1/1	0/0	1/1	1/1	1/1	0/0	0/0	0/0	0/0	0/0	1/1	0/0	0/0	0/0	0/0	T|missense_variant|MODERATE|OS01G0152950|OS01G0152950|transcript|OS01T0152950-00|protein_coding|1/1|c.346G>A|p.Ala116Thr|346/1296|346/1296|116/431||,T|upstream_gene_variant|MODIFIER|OS01G0152951|OS01G0152951|transcript|OS01T0152951-00|protein_coding||c.-656C>T|||||656|
chr01	2848743	C	T	20873.6	0/0	0/0	1/1	0/0	0/0	1/1	1/1	1/1	0/0	1/1	0/0	1/1	1/1	1/1	0/0	0/0	0/0	0/0	0/0	1/1	0/0	0/0	0/0	0/0	T|missense_variant|MODERATE|OS01G0152950|OS01G0152950|transcript|OS01T0152950-00|protein_coding|1/1|c.107G>A|p.Arg36Gln|107/1296|107/1296|36/431||,T|upstream_gene_variant|MODIFIER|OS01G0152951|OS01G0152951|transcript|OS01T0152951-00|protein_coding||c.-417C>T|||||417|
chr01	2866531	G	A	22484.6	0/0	0/0	1/1	0/0	0/0	1/1	1/1	1/1	0/0	1/1	0/0	1/1	1/1	1/1	0/0	0/0	0/0	0/0	0/0	1/1	0/0	0/0	0/0	0/0	A|missense_variant|MODERATE|OS01G0153250|OS01G0153250|transcript|OS01T0153250-00|protein_coding|1/1|c.811C>T|p.Arg271Cys|811/3066|811/2730|271/909||,A|5_prime_UTR_variant|MODIFIER|OS01G0153275|OS01G0153275|transcript|OS01T0153275-00|protein_coding|1/1|c.-273G>A|||||273|,A|downstream_gene_variant|MODIFIER|OS01G0153150|OS01G0153150|transcript|OS01T0153150-01|protein_coding||c.*5308G>A|||||1992|
chr01	2866865	T	C	22292.7	0/0	0/0	1/1	0/0	0/0	1/1	1/1	1/1	0/0	1/1	0/0	1/1	1/1	1/1	0/0	0/0	0/0	0/0	0/0	1/1	0/0	0/0	0/0	0/0	C|missense_variant|MODERATE|OS01G0153275|OS01G0153275|transcript|OS01T0153275-00|protein_coding|1/1|c.62T>C|p.Met21Thr|2140/2686|62/465|21/154||,C|synonymous_variant|LOW|OS01G0153250|OS01G0153250|transcript|OS01T0153250-00|protein_coding|1/1|c.477A>G|p.Ser159Ser|477/3066|477/2730|159/909||
chr01	2866957	A	C	21612.6	0/0	0/0	1/1	0/0	0/0	1/1	1/1	1/1	0/0	1/1	0/0	1/1	1/1	1/1	0/0	0/0	0/0	0/0	0/0	1/1	0/0	0/0	0/0	0/0	C|missense_variant|MODERATE|OS01G0153250|OS01G0153250|transcript|OS01T0153250-00|protein_coding|1/1|c.385T>G|p.Ser129Ala|385/3066|385/2730|129/909||,C|missense_variant|MODERATE|OS01G0153275|OS01G0153275|transcript|OS01T0153275-00|protein_coding|1/1|c.154A>C|p.Lys52Gln|2232/2686|154/465|52/154||
chr01	2893296	T	C	18549.6	0/0	0/0	1|1	0/0	0/0	1|1	1|1	1|1	0/0	1|1	0/0	1|1	1|1	1|1	0/0	0/0	0/0	0/0	0/0	1|1	0/0	0/0	0/0	0/0	C|missense_variant|MODERATE|OS01G0153700|OS01G0153700|transcript|OS01T0153700-01|protein_coding|1/1|c.1363A>G|p.Met455Val|1412/1788|1363/1377|455/458||
chr01	2893305	C	T	18778.6	0/0	0/0	1|1	0/0	0/0	1|1	1|1	1|1	0/0	1|1	0/0	1|1	1|1	1|1	0/0	0/0	0/0	0/0	0/0	1|1	0/0	0/0	0/0	0/0	T|missense_variant|MODERATE|OS01G0153700|OS01G0153700|transcript|OS01T0153700-01|protein_coding|1/1|c.1354G>A|p.Ala452Thr|1403/1788|1354/1377|452/458||
chr01	2893965	G	A	21791.6	0/0	0/0	1/1	0/0	0/0	1/1	1/1	1/1	0/0	1/1	0/0	1/1	1/1	1/1	0/0	0/0	0/0	0/0	0/0	1/1	0/0	0/0	0/0	0/0	A|missense_variant|MODERATE|OS01G0153700|OS01G0153700|transcript|OS01T0153700-01|protein_coding|1/1|c.694C>T|p.Pro232Ser|743/1788|694/1377|232/458||
chr01	2894028	T	C	21965.6	0/0	0/0	1/1	0/0	0/0	1/1	1/1	1/1	0/0	1/1	0/0	1/1	1/1	1/1	0/0	0/0	0/0	0/0	0/0	1/1	0/0	0/0	0/0	0/0	C|missense_variant|MODERATE|OS01G0153700|OS01G0153700|transcript|OS01T0153700-01|protein_coding|1/1|c.631A>G|p.Lys211Glu|680/1788|631/1377|211/458||
chr01	2894082	C	T	21106.6	0/0	0/0	1/1	0/0	0/0	1/1	1/1	1/1	0/0	1/1	0/0	1/1	1/1	1/1	0/0	0/0	0/0	0/0	0/0	1/1	0/0	0/0	0/0	0/0	T|missense_variant|MODERATE|OS01G0153700|OS01G0153700|transcript|OS01T0153700-01|protein_coding|1/1|c.577G>A|p.Glu193Lys|626/1788|577/1377|193/458||
chr01	2894159	C	T	22451.6	0/0	0/0	1/1	0/0	0/0	1/1	1/1	1/1	0/0	1/1	0/0	1/1	1/1	1/1	0/0	0/0	0/0	0/0	0/0	1/1	0/0	0/0	0/0	0/0	T|missense_variant|MODERATE|OS01G0153700|OS01G0153700|transcript|OS01T0153700-01|protein_coding|1/1|c.500G>A|p.Arg167His|549/1788|500/1377|167/458||
chr01	2894510	G	A	22262.6	0/0	0/0	1/1	0/0	0/0	1/1	1/1	1/1	0/0	1/1	0/0	1/1	1/1	1/1	0/0	0/0	0/0	0/0	0/0	1/1	0/0	0/0	0/0	0/0	A|missense_variant|MODERATE|OS01G0153700|OS01G0153700|transcript|OS01T0153700-01|protein_coding|1/1|c.149C>T|p.Ala50Val|198/1788|149/1377|50/458||
chr01	2894567	A	T	21748.6	0/0	0/0	1/1	0/0	0/0	1/1	1/1	1/1	0/0	1/1	0/0	1/1	1/1	1/1	0/0	0/0	0/0	0/0	0/0	1/1	0/0	0/0	0/0	0/0	T|missense_variant|MODERATE|OS01G0153700|OS01G0153700|transcript|OS01T0153700-01|protein_coding|1/1|c.92T>A|p.Phe31Tyr|141/1788|92/1377|31/458||
chr01	2896923	A	T	22082.6	0/0	0/0	1/1	0/0	0/0	1/1	1/1	1/1	0/0	1/1	0/0	1/1	1/1	1/1	0/0	0/0	0/0	0/0	0/0	1/1	0/0	0/0	0/0	0/0	T|missense_variant|MODERATE|OS01G0153800|OS01G0153800|transcript|OS01T0153800-00|protein_coding|1/1|c.83A>T|p.Lys28Met|83/1104|83/1104|28/367||WARNING_TRANSCRIPT_NO_START_CODON
chr01	2897127	T	C	23371.6	0/0	0/0	1/1	0/0	0/0	1/1	1/1	1/1	0/0	1/1	0/0	1/1	1/1	1/1	0/0	0/0	0/0	0/0	0/0	1/1	0/0	0/0	0/0	0/0	C|missense_variant|MODERATE|OS01G0153800|OS01G0153800|transcript|OS01T0153800-00|protein_coding|1/1|c.287T>C|p.Leu96Pro|287/1104|287/1104|96/367||WARNING_TRANSCRIPT_NO_START_CODON,C|downstream_gene_variant|MODIFIER|OS01G0153900|OS01G0153900|transcript|OS01T0153900-00|protein_coding||c.*2002A>G|||||1930|
chr01	2897171	C	T	24984.6	0/0	0/0	1/1	0/0	0/0	1/1	1/1	1/1	0/0	1/1	0/0	1/1	1/1	1/1	0/0	0/0	0/0	0/0	0/0	1/1	0/0	0/0	0/0	0/0	T|missense_variant|MODERATE|OS01G0153800|OS01G0153800|transcript|OS01T0153800-00|protein_coding|1/1|c.331C>T|p.Leu111Phe|331/1104|331/1104|111/367||WARNING_TRANSCRIPT_NO_START_CODON,T|downstream_gene_variant|MODIFIER|OS01G0153900|OS01G0153900|transcript|OS01T0153900-00|protein_coding||c.*1958G>A|||||1886|
chr01	2897261	C	T	27247.6	0/0	0/0	1|1	0/0	0/0	1|1	1|1	1|1	0/0	1|1	0/0	1|1	1|1	1|1	0/0	0/0	0/0	0/0	0/0	1|1	0/0	0/0	0/0	0/0	T|missense_variant|MODERATE|OS01G0153800|OS01G0153800|transcript|OS01T0153800-00|protein_coding|1/1|c.421C>T|p.Pro141Ser|421/1104|421/1104|141/367||WARNING_TRANSCRIPT_NO_START_CODON,T|downstream_gene_variant|MODIFIER|OS01G0153900|OS01G0153900|transcript|OS01T0153900-00|protein_coding||c.*1868G>A|||||1796|
chr01	2920772	T	G	22877.6	0/0	0/0	1/1	0/0	0/0	1/1	1/1	1/1	0/0	1/1	0/0	1/1	1/1	1/1	0/0	0/0	0/0	0/0	0/0	1/1	0/0	0/0	0/0	0/0	G|missense_variant|MODERATE|OS01G0154200|OS01G0154200|transcript|OS01T0154200-00|protein_coding|1/2|c.548A>C|p.Tyr183Ser|550/782|548/780|183/259||,G|missense_variant|MODERATE|OS01G0154250|OS01G0154250|transcript|OS01T0154250-00|protein_coding|1/1|c.131T>G|p.Val44Gly|132/642|131/639|44/212||WARNING_TRANSCRIPT_NO_START_CODON,G|upstream_gene_variant|MODIFIER|OS01G0154300|OS01G0154300|transcript|OS01…
chr01	2932006	A	C	19536.6	0/0	0/0	1/1	0/0	0/0	1/1	1/1	1/1	0/0	1/1	0/0	1/1	1/1	1/1	0/0	0/0	0/0	0/0	0/0	1/1	0/0	0/0	0/0	0/0	C|missense_variant|MODERATE|OS01G0154600|OS01G0154600|transcript|OS01T0154600-01|protein_coding|2/3|c.94A>C|p.Ile32Leu|270/1035|94/726|32/241||,C|downstream_gene_variant|MODIFIER|EPlOSAG00000013669|EPlOSAG00000013669|transcript|EPlOSAT00000015057|lincRNA||n.*1472A>C|||||1472|
chr01	2954514	T	G	22558.6	0/0	0/0	1|1	0/0	0/0	1|1	1|1	1|1	0/0	1|1	0/0	1|1	1|1	1|1	0/0	0/0	0/0	0/0	0/0	1|1	0/0	0/0	0/0	0/0	G|missense_variant|MODERATE|OS01G0154950|OS01G0154950|transcript|OS01T0154950-01|protein_coding|1/1|c.4T>G|p.Leu2Val|5/2340|4/888|2/295||WARNING_TRANSCRIPT_NO_START_CODON,G|downstream_gene_variant|MODIFIER|EPlOSAG00000030240|EPlOSAG00000030240|transcript|EPlOSAT00000031628|lincRNA||n.*1194A>C|||||1194|
chr01	2954515	T	A	22558.6	0/0	0/0	1|1	0/0	0/0	1|1	1|1	1|1	0/0	1|1	0/0	1|1	1|1	1|1	0/0	0/0	0/0	0/0	0/0	1|1	0/0	0/0	0/0	0/0	A|stop_gained|HIGH|OS01G0154950|OS01G0154950|transcript|OS01T0154950-01|protein_coding|1/1|c.5T>A|p.Leu2*|6/2340|5/888|2/295||WARNING_TRANSCRIPT_NO_START_CODON,A|downstream_gene_variant|MODIFIER|EPlOSAG00000030240|EPlOSAG00000030240|transcript|EPlOSAT00000031628|lincRNA||n.*1193A>T|||||1193|
chr01	2954560	A	T	20012.6	0/0	0/0	1/1	0/0	0/0	1/1	1/1	1/1	0/0	1/1	0/0	1/1	1/1	1/1	0/0	0/0	0/0	0/0	0/0	1/1	0/0	0/0	0/0	0/0	T|missense_variant|MODERATE|OS01G0154950|OS01G0154950|transcript|OS01T0154950-01|protein_coding|1/1|c.50A>T|p.Lys17Met|51/2340|50/888|17/295||WARNING_TRANSCRIPT_NO_START_CODON,T|downstream_gene_variant|MODIFIER|EPlOSAG00000030240|EPlOSAG00000030240|transcript|EPlOSAT00000031628|lincRNA||n.*1148T>A|||||1148|
chr01	2958310	A	C	20908.6	0/0	0/0	1/1	0/0	0/0	1/1	1/1	1/1	0/0	1/1	0/0	1/1	1/1	1/1	0/0	0/0	0/0	0/0	0/0	1/1	0/0	0/0	0/0	0/0	C|missense_variant|MODERATE|OS01G0155000|OS01G0155000|transcript|OS01T0155000-02|protein_coding|1/1|c.100T>G|p.Ser34Ala|130/1274|100/1014|34/337||,C|downstream_gene_variant|MODIFIER|OS01G0154950|OS01G0154950|transcript|OS01T0154950-01|protein_coding||c.*2912A>C|||||1461|WARNING_TRANSCRIPT_NO_START_CODON
chr01	2964097	C	A	25130.6	0/0	0/0	1/1	0/0	0/0	1/1	1/1	1/1	0/0	1/1	0/0	1/1	1/1	1/1	0/0	0/0	0/0	0/0	0/0	1/1	0/0	0/0	0/0	0/0	A|missense_variant|MODERATE|OS01G0155200|OS01G0155200|transcript|OS01T0155200-00|protein_coding|1/1|c.821G>T|p.Arg274Leu|876/2551|821/2496|274/831||
chr01	2964449	G	A	24737.6	0/0	0/0	1/1	0/0	0/0	1/1	1/1	1/1	0/0	1/1	0/0	1/1	1/1	1/1	0/0	0/0	0/0	0/0	0/0	1/1	0/0	0/0	0/0	0/0	A|missense_variant|MODERATE|OS01G0155200|OS01G0155200|transcript|OS01T0155200-00|protein_coding|1/1|c.469C>T|p.Pro157Ser|524/2551|469/2496|157/831||,A|upstream_gene_variant|MODIFIER|OS01G0155300|OS01G0155300|transcript|OS01T0155300-00|protein_coding||c.-1875G>A|||||1865|
chr01	2971461	G	C	22962.6	0/0	0/0	1/1	0/0	0/0	1/1	1/1	1/1	0/0	1/1	0/0	1/1	1/1	1/1	0/0	0/0	0/0	0/0	0/0	1/1	0/0	0/0	0/0	0/0	C|missense_variant|MODERATE|OS01G0155400|OS01G0155400|transcript|OS01T0155400-01|protein_coding|12/12|c.1246C>G|p.Gln416Glu|1247/1578|1246/1338|416/445||WARNING_TRANSCRIPT_NO_START_CODON,C|downstream_gene_variant|MODIFIER|EPlOSAG00000049156|EPlOSAG00000049156|transcript|EPlOSAT00000050544|lincRNA||n.*1257C>G|||||1257|,C|downstream_gene_variant|MODIFIER|EPlOSAG00000026122|EPlOSAG00000026122|transc…
chr01	2983732	CG	C	21799.6	0/0	0/0	1|1	0/0	0/0	1|1	1|1	1|1	0/0	1|1	0/0	1|1	1|1	1|1	0/0	0/0	0/0	0/0	0/0	1|1	0/0	0/0	0/0	0/0	C|frameshift_variant|HIGH|OS01G0155500|OS01G0155500|transcript|OS01T0155500-01|protein_coding|3/3|c.592delG|p.Ala198fs|677/3037|592/2811|198/936||WARNING_TRANSCRIPT_NO_START_CODON&INFO_REALIGN_3_PRIME,C|upstream_gene_variant|MODIFIER|EPlOSAG00000004677|EPlOSAG00000004677|transcript|EPlOSAT00000006065|lincRNA||n.-816delC|||||816|
chr01	2983735	CGA	C	21799.6	0/0	0/0	1|1	0/0	0/0	1|1	1|1	1|1	0/0	1|1	0/0	1|1	1|1	1|1	0/0	0/0	0/0	0/0	0/0	1|1	0/0	0/0	0/0	0/0	C|frameshift_variant|HIGH|OS01G0155500|OS01G0155500|transcript|OS01T0155500-01|protein_coding|3/3|c.594_595delGA|p.Thr199fs|679/3037|594/2811|198/936||WARNING_TRANSCRIPT_NO_START_CODON,C|upstream_gene_variant|MODIFIER|EPlOSAG00000004677|EPlOSAG00000004677|transcript|EPlOSAT00000006065|lincRNA||n.-820_-819delTC|||||819|
chr01	2983975	A	C	27974.6	0/0	0/0	1|1	0/0	0/0	1|1	1|1	1|1	0/0	1|1	0/0	1|1	1|1	1|1	0/0	0/0	0/0	0/0	0/0	1|1	0/0	0/0	0/0	0/0	C|missense_variant|MODERATE|OS01G0155500|OS01G0155500|transcript|OS01T0155500-01|protein_coding|3/3|c.833A>C|p.Gln278Pro|918/3037|833/2811|278/936||WARNING_TRANSCRIPT_NO_START_CODON,C|upstream_gene_variant|MODIFIER|EPlOSAG00000004677|EPlOSAG00000004677|transcript|EPlOSAT00000006065|lincRNA||n.-1058T>G|||||1058|
chr01	2983976	A	C	27974.6	0/0	0/0	1|1	0/0	0/0	1|1	1|1	1|1	0/0	1|1	0/0	1|1	1|1	1|1	0/0	0/0	0/0	0/0	0/0	1|1	0/0	0/0	0/0	0/0	C|missense_variant|MODERATE|OS01G0155500|OS01G0155500|transcript|OS01T0155500-01|protein_coding|3/3|c.834A>C|p.Gln278His|919/3037|834/2811|278/936||WARNING_TRANSCRIPT_NO_START_CODON,C|upstream_gene_variant|MODIFIER|EPlOSAG00000004677|EPlOSAG00000004677|transcript|EPlOSAT00000006065|lincRNA||n.-1059T>G|||||1059|
chr01	2983991	C	G	24628.6	0/0	0/0	1/1	0/0	0/0	1/1	1/1	1/1	0/0	1/1	0/0	1/1	1/1	1/1	0/0	0/0	0/0	0/0	0/0	1/1	0/0	0/0	0/0	0/0	G|missense_variant|MODERATE|OS01G0155500|OS01G0155500|transcript|OS01T0155500-01|protein_coding|3/3|c.849C>G|p.Asp283Glu|934/3037|849/2811|283/936||WARNING_TRANSCRIPT_NO_START_CODON,G|upstream_gene_variant|MODIFIER|EPlOSAG00000004677|EPlOSAG00000004677|transcript|EPlOSAT00000006065|lincRNA||n.-1074G>C|||||1074|
chr01	2984020	G	T	25272.6	0/0	0/0	1|1	0/0	0/0	1|1	1|1	1|1	0/0	1|1	0/0	1|1	1|1	1|1	0/0	0/0	0/0	0/0	0/0	1|1	0/0	0/0	0/0	0/0	T|missense_variant|MODERATE|OS01G0155500|OS01G0155500|transcript|OS01T0155500-01|protein_coding|3/3|c.878G>T|p.Ser293Ile|963/3037|878/2811|293/936||WARNING_TRANSCRIPT_NO_START_CODON,T|upstream_gene_variant|MODIFIER|EPlOSAG00000004677|EPlOSAG00000004677|transcript|EPlOSAT00000006065|lincRNA||n.-1103C>A|||||1103|
chr01	2984024	C	G	25227.6	0/0	0/0	1|1	0/0	0/0	1|1	1|1	1|1	0/0	1|1	0/0	1|1	1|1	1|1	0/0	0/0	0/0	0/0	0/0	1|1	0/0	0/0	0/0	0/0	G|missense_variant|MODERATE|OS01G0155500|OS01G0155500|transcript|OS01T0155500-01|protein_coding|3/3|c.882C>G|p.Asp294Glu|967/3037|882/2811|294/936||WARNING_TRANSCRIPT_NO_START_CODON,G|upstream_gene_variant|MODIFIER|EPlOSAG00000004677|EPlOSAG00000004677|transcript|EPlOSAT00000006065|lincRNA||n.-1107G>C|||||1107|
chr01	2984029	A	C	24597.6	0/0	0/0	1|1	0/0	0/0	1|1	1|1	1|1	0/0	1|1	0/0	1|1	1|1	1|1	0/0	0/0	0/0	0/0	0/0	1|1	0/0	0/0	0/0	0/0	C|missense_variant|MODERATE|OS01G0155500|OS01G0155500|transcript|OS01T0155500-01|protein_coding|3/3|c.887A>C|p.Gln296Pro|972/3037|887/2811|296/936||WARNING_TRANSCRIPT_NO_START_CODON,C|upstream_gene_variant|MODIFIER|EPlOSAG00000004677|EPlOSAG00000004677|transcript|EPlOSAT00000006065|lincRNA||n.-1112T>G|||||1112|
chr01	2984033	A	C	25002.6	0/0	0/0	1|1	0/0	0/0	1|1	1|1	1|1	0/0	1|1	0/0	1|1	1|1	1|1	0/0	0/0	0/0	0/0	0/0	1|1	0/0	0/0	0/0	0/0	C|missense_variant|MODERATE|OS01G0155500|OS01G0155500|transcript|OS01T0155500-01|protein_coding|3/3|c.891A>C|p.Leu297Phe|976/3037|891/2811|297/936||WARNING_TRANSCRIPT_NO_START_CODON,C|upstream_gene_variant|MODIFIER|EPlOSAG00000004677|EPlOSAG00000004677|transcript|EPlOSAT00000006065|lincRNA||n.-1116T>G|||||1116|
chr01	2984038	T	TCTCCAC	25857.6	0/0	0/0	1|1	0/0	0/0	1|1	1|1	1|1	0/0	1|1	0/0	1|1	1|1	1|1	0/0	0/0	0/0	0/0	0/0	1|1	0/0	0/0	0/0	0/0	TCTCCAC|disruptive_inframe_insertion|MODERATE|OS01G0155500|OS01G0155500|transcript|OS01T0155500-01|protein_coding|3/3|c.896_897insCTCCAC|p.Val299_Gly300insSerThr|982/3037|897/2811|299/936||WARNING_TRANSCRIPT_NO_START_CODON,TCTCCAC|upstream_gene_variant|MODIFIER|EPlOSAG00000004677|EPlOSAG00000004677|transcript|EPlOSAT00000006065|lincRNA||n.-1122_-1121insGTGGAG|||||1122|
chr01	2984040	G	GT	25767.6	0/0	0/0	1|1	0/0	0/0	1|1	1|1	1|1	0/0	1|1	0/0	1|1	1|1	1|1	0/0	0/0	0/0	0/0	0/0	1|1	0/0	0/0	0/0	0/0	GT|frameshift_variant|HIGH|OS01G0155500|OS01G0155500|transcript|OS01T0155500-01|protein_coding|3/3|c.898_899insT|p.Gly300fs|984/3037|899/2811|300/936||WARNING_TRANSCRIPT_NO_START_CODON,GT|upstream_gene_variant|MODIFIER|EPlOSAG00000004677|EPlOSAG00000004677|transcript|EPlOSAT00000006065|lincRNA||n.-1124_-1123insA|||||1124|
chr01	2984041	G	T	24552.6	0/0	0/0	1|1	0/0	0/0	1|1	1|1	1|1	0/0	1|1	0/0	1|1	1|1	1|1	0/0	0/0	0/0	0/0	0/0	1|1	0/0	0/0	0/0	0/0	T|missense_variant|MODERATE|OS01G0155500|OS01G0155500|transcript|OS01T0155500-01|protein_coding|3/3|c.899G>T|p.Gly300Val|984/3037|899/2811|300/936||WARNING_TRANSCRIPT_NO_START_CODON,T|upstream_gene_variant|MODIFIER|EPlOSAG00000004677|EPlOSAG00000004677|transcript|EPlOSAT00000006065|lincRNA||n.-1124C>A|||||1124|
chr01	2984044	C	CA	24282.6	0/0	0/0	1|1	0/0	0/0	1|1	1|1	1|1	0/0	1|1	0/0	1|1	1|1	1|1	0/0	0/0	0/0	0/0	0/0	1|1	0/0	0/0	0/0	0/0	CA|frameshift_variant|HIGH|OS01G0155500|OS01G0155500|transcript|OS01T0155500-01|protein_coding|3/3|c.902_903insA|p.Ala302fs|988/3037|903/2811|301/936||WARNING_TRANSCRIPT_NO_START_CODON,CA|upstream_gene_variant|MODIFIER|EPlOSAG00000004677|EPlOSAG00000004677|transcript|EPlOSAT00000006065|lincRNA||n.-1128_-1127insT|||||1128|
chr01	2984045	C	CT	24237.6	0/0	0/0	1|1	0/0	0/0	1|1	1|1	1|1	0/0	1|1	0/0	1|1	1|1	1|1	0/0	0/0	0/0	0/0	0/0	1|1	0/0	0/0	0/0	0/0	CT|frameshift_variant|HIGH|OS01G0155500|OS01G0155500|transcript|OS01T0155500-01|protein_coding|3/3|c.903_904insT|p.Ala302fs|989/3037|904/2811|302/936||WARNING_TRANSCRIPT_NO_START_CODON,CT|upstream_gene_variant|MODIFIER|EPlOSAG00000004677|EPlOSAG00000004677|transcript|EPlOSAT00000006065|lincRNA||n.-1129_-1128insA|||||1129|
chr01	2984049	A	G	23607.6	0/0	0/0	1|1	0/0	0/0	1|1	1|1	1|1	0/0	1|1	0/0	1|1	1|1	1|1	0/0	0/0	0/0	0/0	0/0	1|1	0/0	0/0	0/0	0/0	G|missense_variant|MODERATE|OS01G0155500|OS01G0155500|transcript|OS01T0155500-01|protein_coding|3/3|c.907A>G|p.Met303Val|992/3037|907/2811|303/936||WARNING_TRANSCRIPT_NO_START_CODON,G|upstream_gene_variant|MODIFIER|EPlOSAG00000004677|EPlOSAG00000004677|transcript|EPlOSAT00000006065|lincRNA||n.-1132T>C|||||1132|
chr01	2984058	G	A	23887.6	0/0	0/0	1|1	0/0	0/0	1|1	1|1	1|1	0/0	1|1	0/0	1|1	1|1	1|1	0/0	0/0	0/0	0/0	0/0	1|1	0/0	0/0	0/0	0/0	A|missense_variant|MODERATE|OS01G0155500|OS01G0155500|transcript|OS01T0155500-01|protein_coding|3/3|c.916G>A|p.Gly306Arg|1001/3037|916/2811|306/936||WARNING_TRANSCRIPT_NO_START_CODON,A|upstream_gene_variant|MODIFIER|EPlOSAG00000004677|EPlOSAG00000004677|transcript|EPlOSAT00000006065|lincRNA||n.-1141C>T|||||1141|
chr01	2984059	G	A	23751.6	0/0	0/0	1|1	0/0	0/0	1|1	1|1	1|1	0/0	1|1	0/0	1|1	1|1	1|1	0/0	0/0	0/0	0/0	0/0	1|1	0/0	0/0	0/0	0/0	A|missense_variant|MODERATE|OS01G0155500|OS01G0155500|transcript|OS01T0155500-01|protein_coding|3/3|c.917G>A|p.Gly306Glu|1002/3037|917/2811|306/936||WARNING_TRANSCRIPT_NO_START_CODON,A|upstream_gene_variant|MODIFIER|EPlOSAG00000004677|EPlOSAG00000004677|transcript|EPlOSAT00000006065|lincRNA||n.-1142C>T|||||1142|
chr01	2984080	C	T	25319.6	0/0	0/0	1|1	0/0	0/0	1|1	1|1	1|1	0/0	1|1	0/0	1|1	1|1	1|1	0/0	0/0	0/0	0/0	0/0	1|1	0/0	0/0	0/0	0/0	T|missense_variant|MODERATE|OS01G0155500|OS01G0155500|transcript|OS01T0155500-01|protein_coding|3/3|c.938C>T|p.Pro313Leu|1023/3037|938/2811|313/936||WARNING_TRANSCRIPT_NO_START_CODON,T|upstream_gene_variant|MODIFIER|EPlOSAG00000004677|EPlOSAG00000004677|transcript|EPlOSAT00000006065|lincRNA||n.-1163G>A|||||1163|
chr01	2984091	C	G	24860.6	0/0	0/0	1|1	0/0	0/0	1|1	1|1	1|1	0/0	1|1	0/0	1|1	1|1	1|1	0/0	0/0	0/0	0/0	0/0	1|1	0/0	0/0	0/0	0/0	G|missense_variant|MODERATE|OS01G0155500|OS01G0155500|transcript|OS01T0155500-01|protein_coding|3/3|c.949C>G|p.Pro317Ala|1034/3037|949/2811|317/936||WARNING_TRANSCRIPT_NO_START_CODON,G|upstream_gene_variant|MODIFIER|EPlOSAG00000004677|EPlOSAG00000004677|transcript|EPlOSAT00000006065|lincRNA||n.-1174G>C|||||1174|
chr01	2984109	A	G	23634.6	0/0	0/0	1/1	0/0	0/0	1/1	1/1	1/1	0/0	1/1	0/0	1/1	1/1	1/1	0/0	0/0	0/0	0/0	0/0	1/1	0/0	0/0	0/0	0/0	G|missense_variant|MODERATE|OS01G0155500|OS01G0155500|transcript|OS01T0155500-01|protein_coding|3/3|c.967A>G|p.Asn323Asp|1052/3037|967/2811|323/936||WARNING_TRANSCRIPT_NO_START_CODON,G|upstream_gene_variant|MODIFIER|EPlOSAG00000004677|EPlOSAG00000004677|transcript|EPlOSAT00000006065|lincRNA||n.-1192T>C|||||1192|
chr01	2984159	G	GA	18659.6	0/0	0/0	1|1	0/0	0/0	1|1	1|1	1|1	0/0	1|1	0/0	1|1	1|1	1|1	0/0	0/0	0/0	0/0	0/0	1|1	0/0	0/0	0/0	0/0	GA|frameshift_variant|HIGH|OS01G0155500|OS01G0155500|transcript|OS01T0155500-01|protein_coding|3/3|c.1018dupA|p.Thr340fs|1104/3037|1019/2811|340/936||WARNING_TRANSCRIPT_NO_START_CODON&INFO_REALIGN_3_PRIME,GA|upstream_gene_variant|MODIFIER|EPlOSAG00000004677|EPlOSAG00000004677|transcript|EPlOSAT00000006065|lincRNA||n.-1243dupT|||||1243|
chr01	2984162	GA	G	19109.6	0/0	0/0	1|1	0/0	0/0	1|1	1|1	1|1	0/0	1|1	0/0	1|1	1|1	1|1	0/0	0/0	0/0	0/0	0/0	1|1	0/0	0/0	0/0	0/0	G|frameshift_variant|HIGH|OS01G0155500|OS01G0155500|transcript|OS01T0155500-01|protein_coding|3/3|c.1022delA|p.Asn341fs|1107/3037|1022/2811|341/936||WARNING_TRANSCRIPT_NO_START_CODON&INFO_REALIGN_3_PRIME,G|upstream_gene_variant|MODIFIER|EPlOSAG00000004677|EPlOSAG00000004677|transcript|EPlOSAT00000006065|lincRNA||n.-1246delT|||||1246|
chr01	2984164	A	G	18776.6	0/0	0/0	1|1	0/0	0/0	1|1	1|1	1|1	0/0	1|1	0/0	1|1	1|1	1|1	0/0	0/0	0/0	0/0	0/0	1|1	0/0	0/0	0/0	0/0	G|missense_variant|MODERATE|OS01G0155500|OS01G0155500|transcript|OS01T0155500-01|protein_coding|3/3|c.1022A>G|p.Asn341Ser|1107/3037|1022/2811|341/936||WARNING_TRANSCRIPT_NO_START_CODON,G|upstream_gene_variant|MODIFIER|EPlOSAG00000004677|EPlOSAG00000004677|transcript|EPlOSAT00000006065|lincRNA||n.-1247T>C|||||1247|
chr01	2984169	A	G	20007.6	0/0	0/0	1|1	0/0	0/0	1|1	1|1	1|1	0/0	1|1	0/0	1|1	1|1	1|1	0/0	0/0	0/0	0/0	0/0	1|1	0/0	0/0	0/0	0/0	G|missense_variant|MODERATE|OS01G0155500|OS01G0155500|transcript|OS01T0155500-01|protein_coding|3/3|c.1027A>G|p.Thr343Ala|1112/3037|1027/2811|343/936||WARNING_TRANSCRIPT_NO_START_CODON,G|upstream_gene_variant|MODIFIER|EPlOSAG00000004677|EPlOSAG00000004677|transcript|EPlOSAT00000006065|lincRNA||n.-1252T>C|||||1252|
chr01	2984170	C	T	19864.6	0/0	0/0	1|1	0/0	0/0	1|1	1|1	1|1	0/0	1|1	0/0	1|1	1|1	1|1	0/0	0/0	0/0	0/0	0/0	1|1	0/0	0/0	0/0	0/0	T|missense_variant|MODERATE|OS01G0155500|OS01G0155500|transcript|OS01T0155500-01|protein_coding|3/3|c.1028C>T|p.Thr343Met|1113/3037|1028/2811|343/936||WARNING_TRANSCRIPT_NO_START_CODON,T|upstream_gene_variant|MODIFIER|EPlOSAG00000004677|EPlOSAG00000004677|transcript|EPlOSAT00000006065|lincRNA||n.-1253G>A|||||1253|
chr01	2984172	G	T	19711.6	0/0	0/0	1|1	0/0	0/0	1|1	1|1	1|1	0/0	1|1	0/0	1|1	1|1	1|1	0/0	0/0	0/0	0/0	0/0	1|1	0/0	0/0	0/0	0/0	T|missense_variant|MODERATE|OS01G0155500|OS01G0155500|transcript|OS01T0155500-01|protein_coding|3/3|c.1030G>T|p.Asp344Tyr|1115/3037|1030/2811|344/936||WARNING_TRANSCRIPT_NO_START_CODON,T|upstream_gene_variant|MODIFIER|EPlOSAG00000004677|EPlOSAG00000004677|transcript|EPlOSAT00000006065|lincRNA||n.-1255C>A|||||1255|
chr01	2984173	A	T	19666.6	0/0	0/0	1|1	0/0	0/0	1|1	1|1	1|1	0/0	1|1	0/0	1|1	1|1	1|1	0/0	0/0	0/0	0/0	0/0	1|1	0/0	0/0	0/0	0/0	T|missense_variant|MODERATE|OS01G0155500|OS01G0155500|transcript|OS01T0155500-01|protein_coding|3/3|c.1031A>T|p.Asp344Val|1116/3037|1031/2811|344/936||WARNING_TRANSCRIPT_NO_START_CODON,T|upstream_gene_variant|MODIFIER|EPlOSAG00000004677|EPlOSAG00000004677|transcript|EPlOSAT00000006065|lincRNA||n.-1256T>A|||||1256|
chr01	2984212	G	A	24942.6	0/0	0/0	1|1	0/0	0/0	1|1	1|1	1|1	0/0	1|1	0/0	1|1	1|1	1|1	0/0	0/0	0/0	0/0	0/0	1|1	0/0	0/0	0/0	0/0	A|missense_variant|MODERATE|OS01G0155500|OS01G0155500|transcript|OS01T0155500-01|protein_coding|3/3|c.1070G>A|p.Gly357Asp|1155/3037|1070/2811|357/936||WARNING_TRANSCRIPT_NO_START_CODON,A|upstream_gene_variant|MODIFIER|EPlOSAG00000004677|EPlOSAG00000004677|transcript|EPlOSAT00000006065|lincRNA||n.-1295C>T|||||1295|
chr01	2984214	A	G	24942.6	0/0	0/0	1|1	0/0	0/0	1|1	1|1	1|1	0/0	1|1	0/0	1|1	1|1	1|1	0/0	0/0	0/0	0/0	0/0	1|1	0/0	0/0	0/0	0/0	G|missense_variant|MODERATE|OS01G0155500|OS01G0155500|transcript|OS01T0155500-01|protein_coding|3/3|c.1072A>G|p.Arg358Gly|1157/3037|1072/2811|358/936||WARNING_TRANSCRIPT_NO_START_CODON,G|upstream_gene_variant|MODIFIER|EPlOSAG00000004677|EPlOSAG00000004677|transcript|EPlOSAT00000006065|lincRNA||n.-1297T>C|||||1297|
chr01	2984530	T	C	24284.6	0/0	0/0	1/1	0/0	0/0	1/1	1/1	1/1	0/0	1/1	0/0	1/1	1/1	1/1	0/0	0/0	0/0	0/0	0/0	1/1	0/0	0/0	0/0	0/0	C|missense_variant|MODERATE|OS01G0155500|OS01G0155500|transcript|OS01T0155500-01|protein_coding|3/3|c.1388T>C|p.Met463Thr|1473/3037|1388/2811|463/936||WARNING_TRANSCRIPT_NO_START_CODON,C|upstream_gene_variant|MODIFIER|EPlOSAG00000004677|EPlOSAG00000004677|transcript|EPlOSAT00000006065|lincRNA||n.-1613A>G|||||1613|,C|downstream_gene_variant|MODIFIER|OS01G0155600|OS01G0155600|transcript|OS01T015560…
chr01	3000320	C	CGGA	7747.94	0/0	0/0	1|1	0/0	0/0	1|1	1|1	1|1	0/0	1|1	0/0	1|1	1|1	1|1	0/0	0/0	0/0	0/0	0/0	1|1	0/0	0/0	0/0	0/0	CGGA|disruptive_inframe_insertion|MODERATE|OS01G0155800|OS01G0155800|transcript|OS01T0155800-01|protein_coding|2/3|c.101_102insAGG|p.Gly34dup|209/687|102/375|34/124||INFO_REALIGN_3_PRIME
chr01	3000862	T	TGGC	3977.98	0/0	0/0	1|1	0/0	0/0	.	1|1	1|1	0/0	1|1	0/0	./.	1|1	1|1	0/0	0/0	0/0	0/0	0/0	1|1	0/0	0/0	0/0	0/0	TGGC|disruptive_inframe_insertion|MODERATE|OS01G0155800|OS01G0155800|transcript|OS01T0155800-01|protein_coding|3/3|c.315_317dupCGG|p.Gly106dup|425/687|318/375|106/124||INFO_REALIGN_3_PRIME
chr01	3000882	A	G	2989.62	0/0	0/0	1|1	0/0	0/0	.	1|1	1|1	0/0	1|1	0/0	./.	1|1	1|1	0/0	0/0	0/0	0/0	0/0	1|1	0/0	0/0	0/0	0/0	G|missense_variant|MODERATE|OS01G0155800|OS01G0155800|transcript|OS01T0155800-01|protein_coding|3/3|c.323A>G|p.His108Arg|430/687|323/375|108/124||
chr01	3004441	A	G	21875.6	0/0	0/0	1|1	0/0	0/0	1|1	1|1	1|1	0/0	1|1	0/0	1|1	1|1	1|1	0/0	0/0	0/0	0/0	0/0	1|1	0/0	0/0	0/0	0/0	G|missense_variant|MODERATE|OS01G0156000|OS01G0156000|transcript|OS01T0156000-01|protein_coding|5/7|c.797T>C|p.Ile266Thr|821/1181|797/921|266/306||
chr01	3004447	T	A	22905.6	0/0	0/0	1|1	0/0	0/0	1|1	1|1	1|1	0/0	1|1	0/0	1|1	1|1	1|1	0/0	0/0	0/0	0/0	0/0	1|1	0/0	0/0	0/0	0/0	A|missense_variant|MODERATE|OS01G0156000|OS01G0156000|transcript|OS01T0156000-01|protein_coding|5/7|c.791A>T|p.Asp264Val|815/1181|791/921|264/306||
chr01	3004456	C	T	23356.6	0/0	0/0	1|1	0/0	0/0	1|1	1|1	1|1	0/0	1|1	0/0	1|1	1|1	1|1	0/0	0/0	0/0	0/0	0/0	1|1	0/0	0/0	0/0	0/0	T|missense_variant|MODERATE|OS01G0156000|OS01G0156000|transcript|OS01T0156000-01|protein_coding|5/7|c.782G>A|p.Ser261Asn|806/1181|782/921|261/306||
chr01	3004547	G	T	17506.6	0/0	0/0	1|1	0/0	0/0	1|1	1|1	1|1	0/0	1|1	0/0	1|1	1|1	1|1	0/0	0/0	0/0	0/0	0/0	1|1	0/0	0/0	0/0	0/0	T|missense_variant|MODERATE|OS01G0156000|OS01G0156000|transcript|OS01T0156000-01|protein_coding|5/7|c.691C>A|p.Leu231Met|715/1181|691/921|231/306||
chr01	3004719	G	A	23006.6	0/0	0/0	1/1	0/0	0/0	1/1	1/1	1/1	0/0	1/1	0/0	1/1	1/1	1/1	0/0	0/0	0/0	0/0	0/0	1/1	0/0	0/0	0/0	0/0	A|missense_variant|MODERATE|OS01G0156000|OS01G0156000|transcript|OS01T0156000-01|protein_coding|4/7|c.635C>T|p.Ala212Val|659/1181|635/921|212/306||
chr01	3004755	G	A	23846.6	0/0	0/0	1/1	0/0	0/0	1/1	1/1	1/1	0/0	1/1	0/0	1/1	1/1	1/1	0/0	0/0	0/0	0/0	0/0	1/1	0/0	0/0	0/0	0/0	A|missense_variant|MODERATE|OS01G0156000|OS01G0156000|transcript|OS01T0156000-01|protein_coding|4/7|c.599C>T|p.Thr200Met|623/1181|599/921|200/306||
chr01	3004901	A	T	12833.5	0/0	0/0	1|1	0/0	0/0	1|1	1|1	1|1	0/0	1|1	0/0	1|1	1|1	1|1	0/0	0/0	0/0	0/0	0/0	1|1	0/0	0/0	0/0	0/0	T|missense_variant|MODERATE|OS01G0156000|OS01G0156000|transcript|OS01T0156000-01|protein_coding|3/7|c.548T>A|p.Val183Asp|572/1181|548/921|183/306||
chr01	3004914	G	T	14691.6	0/0	0/0	1|1	0/0	0/0	1|1	1|1	1|1	0/0	1|1	0/0	1|1	1|1	1|1	0/0	0/0	0/0	0/0	0/0	1|1	0/0	0/0	0/0	0/0	T|missense_variant|MODERATE|OS01G0156000|OS01G0156000|transcript|OS01T0156000-01|protein_coding|3/7|c.535C>A|p.Pro179Thr|559/1181|535/921|179/306||
chr01	3004953	T	C	20478.6	0/0	0/0	1|1	0/0	0/0	1|1	1|1	1|1	0/0	1|1	0/0	1|1	1|1	1|1	0/0	0/0	0/0	0/0	0/0	1|1	0/0	0/0	0/0	0/0	C|missense_variant|MODERATE|OS01G0156000|OS01G0156000|transcript|OS01T0156000-01|protein_coding|3/7|c.496A>G|p.Thr166Ala|520/1181|496/921|166/306||
chr01	3005162	C	G	14431.6	0/0	0/0	1|1	0/0	0/0	1|1	1|1	1|1	0/0	1|1	0/0	1|1	1|1	1|1	0/0	0/0	0/0	0/0	0/0	1|1	0/0	0/0	0/0	0/0	G|missense_variant|MODERATE|OS01G0156000|OS01G0156000|transcript|OS01T0156000-01|protein_coding|2/7|c.429G>C|p.Glu143Asp|453/1181|429/921|143/306||
chr01	3005239	T	G	21064.6	0/0	0/0	1|1	0/0	0/0	1|1	1|1	1|1	0/0	1|1	0/0	1|1	1|1	1|1	0/0	0/0	0/0	0/0	0/0	1|1	0/0	0/0	0/0	0/0	G|missense_variant|MODERATE|OS01G0156000|OS01G0156000|transcript|OS01T0156000-01|protein_coding|2/7|c.352A>C|p.Thr118Pro|376/1181|352/921|118/306||
chr01	3005259	A	C	20952.6	0/0	0/0	1|1	0/0	0/0	1|1	1|1	1|1	0/0	1|1	0/0	1|1	1|1	1|1	0/0	0/0	0/0	0/0	0/0	1|1	0/0	0/0	0/0	0/0	C|missense_variant|MODERATE|OS01G0156000|OS01G0156000|transcript|OS01T0156000-01|protein_coding|2/7|c.332T>G|p.Val111Gly|356/1181|332/921|111/306||
chr01	3005272	TCTGCTG	T	17835.6	0/0	0/0	1/1	0/0	0/0	1/1	1/1	1/1	0/0	1/1	0/0	1/1	1/1	1/1	0/0	0/0	0/0	0/0	0/0	1/1	0/0	0/0	0/0	0/0	T|conservative_inframe_deletion|MODERATE|OS01G0156000|OS01G0156000|transcript|OS01T0156000-01|protein_coding|2/7|c.313_318delCAGCAG|p.Gln105_Gln106del|342/1181|313/921|105/306||
chr01	3031868	G	A	25754.6	0/0	0/0	1/1	0/0	0/0	1/1	1/1	1/1	0/0	1/1	0/0	1/1	1/1	1/1	0/0	0/0	0/0	0/0	0/0	1/1	0/0	0/0	0/0	0/0	A|missense_variant|MODERATE|OS01G0157200|OS01G0157200|transcript|OS01T0157200-01|protein_coding|1/1|c.289G>A|p.Val97Ile|390/1531|289/1293|97/430||
chr01	3031904	A	G	25893.6	0/0	0/0	1/1	0/0	0/0	1/1	1/1	1/1	0/0	1/1	0/0	1/1	1/1	1/1	0/0	0/0	0/0	0/0	0/0	1/1	0/0	0/0	0/0	0/0	G|missense_variant|MODERATE|OS01G0157200|OS01G0157200|transcript|OS01T0157200-01|protein_coding|1/1|c.325A>G|p.Thr109Ala|426/1531|325/1293|109/430||
chr01	3038466	A	G	24643.6	0/0	0/0	1/1	0/0	0/0	1/1	1/1	1/1	0/0	1/1	0/0	1/1	1/1	1/1	0/0	0/0	0/0	0/0	0/0	1/1	0/0	0/0	0/0	0/0	G|missense_variant|MODERATE|OS01G0157600|OS01G0157600|transcript|OS01T0157600-01|protein_coding|1/1|c.778A>G|p.Arg260Gly|778/1020|778/888|260/295||WARNING_TRANSCRIPT_NO_START_CODON,G|upstream_gene_variant|MODIFIER|OS01G0157500|OS01G0157500|transcript|OS01T0157500-00|protein_coding||c.-1069T>C|||||1069|,G|upstream_gene_variant|MODIFIER|OS01G0157700|OS01G0157700|transcript|OS01T0157700-00|protein_c…
chr01	3038515	A	C	23270.6	0/0	0/0	1/1	0/0	0/0	1/1	1/1	1/1	0/0	1/1	0/0	1/1	1/1	1/1	0/0	0/0	0/0	0/0	0/0	1/1	0/0	0/0	0/0	0/0	C|missense_variant|MODERATE|OS01G0157600|OS01G0157600|transcript|OS01T0157600-01|protein_coding|1/1|c.827A>C|p.Asp276Ala|827/1020|827/888|276/295||WARNING_TRANSCRIPT_NO_START_CODON,C|upstream_gene_variant|MODIFIER|OS01G0157500|OS01G0157500|transcript|OS01T0157500-00|protein_coding||c.-1118T>G|||||1118|,C|upstream_gene_variant|MODIFIER|OS01G0157700|OS01G0157700|transcript|OS01T0157700-00|protein_c…
chr01	3043136	C	T	25266.6	0/0	0/0	1|1	0/0	0/0	1|1	1|1	1|1	0/0	1|1	0/0	1|1	1|1	1|1	0/0	0/0	0/0	0/0	0/0	1|1	0/0	0/0	0/0	0/0	T|missense_variant|MODERATE|OS01G0157800|OS01G0157800|transcript|OS01T0157800-01|protein_coding|2/3|c.148G>A|p.Ala50Thr|296/709|148/339|50/112||,T|upstream_gene_variant|MODIFIER|OS01G0157900|OS01G0157900|transcript|OS01T0157900-01|protein_coding||c.-1498C>T|||||1352|
chr01	3043141	T	G	25295.6	0/0	0/0	1|1	0/0	0/0	1|1	1|1	1|1	0/0	1|1	0/0	1|1	1|1	1|1	0/0	0/0	0/0	0/0	0/0	1|1	0/0	0/0	0/0	0/0	G|missense_variant|MODERATE|OS01G0157800|OS01G0157800|transcript|OS01T0157800-01|protein_coding|2/3|c.143A>C|p.Glu48Ala|291/709|143/339|48/112||,G|upstream_gene_variant|MODIFIER|OS01G0157900|OS01G0157900|transcript|OS01T0157900-01|protein_coding||c.-1493T>G|||||1347|
chr01	3044706	G	GCC	20422.6	0/0	0/0	1|1	0/0	0/0	1|1	1|1	1|1	0/0	1|1	0/0	1|1	1|1	1|1	0/0	0/0	0/0	0/0	0/0	1|1	0/0	0/0	0/0	0/0	GCC|frameshift_variant|HIGH|OS01G0157900|OS01G0157900|transcript|OS01T0157900-01|protein_coding|1/3|c.73_74insCC|p.Gly25fs|220/1133|74/708|25/235||,GCC|upstream_gene_variant|MODIFIER|OS01G0157800|OS01G0157800|transcript|OS01T0157800-01|protein_coding||c.-509_-508insGG|||||361|,GCC|upstream_gene_variant|MODIFIER|EPlOSAG00000042886|EPlOSAG00000042886|transcript|EPlOSAT00000044274|lincRNA||n.-657_-6…
chr01	3044707	G	GGCGC	20421.6	0/0	0/0	1|1	0/0	0/0	1|1	1|1	1|1	0/0	1|1	0/0	1|1	1|1	1|1	0/0	0/0	0/0	0/0	0/0	1|1	0/0	0/0	0/0	0/0	GGCGC|frameshift_variant|HIGH|OS01G0157900|OS01G0157900|transcript|OS01T0157900-01|protein_coding|1/3|c.74_75insGCGC|p.Gly26fs|221/1133|75/708|25/235||,GGCGC|upstream_gene_variant|MODIFIER|OS01G0157800|OS01G0157800|transcript|OS01T0157800-01|protein_coding||c.-510_-509insGCGC|||||362|,GGCGC|upstream_gene_variant|MODIFIER|EPlOSAG00000042886|EPlOSAG00000042886|transcript|EPlOSAT00000044274|lincRNA|…
chr01	3049686	G	A	21365.6	0/0	0/0	1/1	0/0	0/0	1/1	1/1	1/1	0/0	1/1	0/0	1/1	1/1	1/1	0/0	0/0	0/0	0/0	0/0	1/1	0/0	0/0	0/0	0/0	A|missense_variant|MODERATE|OS01G0158000|OS01G0158000|transcript|OS01T0158000-01|protein_coding|5/11|c.692G>A|p.Ser231Asn|764/1864|692/1587|231/528||,A|missense_variant|MODERATE|OS01G0158000|OS01G0158000|transcript|OS01T0158000-02|protein_coding|5/11|c.692G>A|p.Ser231Asn|740/1767|692/1587|231/528||
chr01	3051084	C	A	22178.6	0/0	0/0	1/1	0/0	0/0	1/1	1/1	1/1	0/0	1/1	0/0	1/1	1/1	1/1	0/0	0/0	0/0	0/0	0/0	1/1	0/0	0/0	0/0	0/0	A|missense_variant|MODERATE|OS01G0158000|OS01G0158000|transcript|OS01T0158000-01|protein_coding|8/11|c.1045C>A|p.His349Asn|1117/1864|1045/1587|349/528||,A|missense_variant|MODERATE|OS01G0158000|OS01G0158000|transcript|OS01T0158000-02|protein_coding|8/11|c.1045C>A|p.His349Asn|1093/1767|1045/1587|349/528||,A|downstream_gene_variant|MODIFIER|OS01G0158100|OS01G0158100|transcript|OS01T0158100-01|prote…
chr01	3051484	A	G	24209.6	0/0	0/0	1|1	0/0	0/0	1|1	1|1	1|1	0/0	1|1	0/0	1|1	1|1	1|1	0/0	0/0	0/0	0/0	0/0	1|1	0/0	0/0	0/0	0/0	G|missense_variant|MODERATE|OS01G0158000|OS01G0158000|transcript|OS01T0158000-01|protein_coding|10/11|c.1222A>G|p.Met408Val|1294/1864|1222/1587|408/528||,G|missense_variant|MODERATE|OS01G0158000|OS01G0158000|transcript|OS01T0158000-02|protein_coding|10/11|c.1222A>G|p.Met408Val|1270/1767|1222/1587|408/528||,G|downstream_gene_variant|MODIFIER|OS01G0158100|OS01G0158100|transcript|OS01T0158100-01|pro…
chr01	3051485	T	C	24209.6	0/0	0/0	1|1	0/0	0/0	1|1	1|1	1|1	0/0	1|1	0/0	1|1	1|1	1|1	0/0	0/0	0/0	0/0	0/0	1|1	0/0	0/0	0/0	0/0	C|missense_variant|MODERATE|OS01G0158000|OS01G0158000|transcript|OS01T0158000-01|protein_coding|10/11|c.1223T>C|p.Met408Thr|1295/1864|1223/1587|408/528||,C|missense_variant|MODERATE|OS01G0158000|OS01G0158000|transcript|OS01T0158000-02|protein_coding|10/11|c.1223T>C|p.Met408Thr|1271/1767|1223/1587|408/528||,C|downstream_gene_variant|MODIFIER|OS01G0158100|OS01G0158100|transcript|OS01T0158100-01|pro…
chr01	3052370	C	CTT	22736.6	0/0	0/0	1/1	0/0	0/0	1/1	1/1	1/1	0/0	1/1	0/0	1/1	1/1	1/1	0/0	0/0	0/0	0/0	0/0	1/1	0/0	0/0	0/0	0/0	CTT|frameshift_variant|HIGH|OS01G0158100|OS01G0158100|transcript|OS01T0158100-01|protein_coding|1/1|c.750_751insAA|p.Glu251fs|781/911|750/804|250/267||,CTT|downstream_gene_variant|MODIFIER|OS01G0158000|OS01G0158000|transcript|OS01T0158000-01|protein_coding||c.*381_*382insTT|||||177|,CTT|downstream_gene_variant|MODIFIER|OS01G0158000|OS01G0158000|transcript|OS01T0158000-02|protein_coding||c.*381_*3…
chr01	3059570	T	G	20526.6	0/0	0/0	1/1	0/0	0/0	1/1	1/1	1/1	0/0	1/1	0/0	1/1	1/1	1/1	0/0	0/0	0/0	0/0	0/0	1/1	0/0	0/0	0/0	0/0	G|missense_variant|MODERATE|OS01G0158400|OS01G0158400|transcript|OS01T0158400-01|protein_coding|1/3|c.32A>C|p.His11Pro|148/942|32/735|11/244||,G|missense_variant|MODERATE|OS01G0158400|OS01G0158400|transcript|OS01T0158400-02|protein_coding|1/3|c.32A>C|p.His11Pro|74/869|32/735|11/244||,G|upstream_gene_variant|MODIFIER|EPlOSAG00000047026|EPlOSAG00000047026|transcript|EPlOSAT00000048414|lincRNA||n.-9…
chr01	3063833	A	C	22640.6	0/0	0/0	1/1	0/0	0/0	1/1	1/1	1/1	0/0	1/1	0/0	1/1	1/1	1/1	0/0	0/0	0/0	0/0	0/0	1/1	0/0	0/0	0/0	0/0	C|missense_variant|MODERATE|OS01G0158500|OS01G0158500|transcript|OS01T0158500-01|protein_coding|10/18|c.873A>C|p.Glu291Asp|995/2130|873/1797|291/598||WARNING_TRANSCRIPT_NO_START_CODON,C|missense_variant|MODERATE|OS01G0158533|OS01G0158533|transcript|OS01T0158533-00|protein_coding|7/13|c.280T>G|p.Phe94Val|906/1736|280/669|94/222||
chr01	3068393	T	C	20535.6	0/0	0/0	1/1	0/0	0/0	1/1	1/1	1/1	0/0	1/1	0/0	1/1	1/1	1/1	0/0	0/0	0/0	0/0	0/0	1/1	0/0	0/0	0/0	0/0	C|missense_variant|MODERATE|OS01G0158600|OS01G0158600|transcript|OS01T0158600-01|protein_coding|1/1|c.2744A>G|p.Gln915Arg|2845/3288|2744/3066|915/1021||,C|downstream_gene_variant|MODIFIER|OS01G0158566|OS01G0158566|transcript|OS01T0158566-00|protein_coding||c.*788T>C|||||425|WARNING_TRANSCRIPT_NO_START_CODON
chr01	3068448	T	C	21138.6	0/0	0/0	1|1	0/0	0/0	1|1	1|1	1|1	0/0	1|1	0/0	1|1	1|1	1|1	0/0	0/0	0/0	0/0	0/0	1|1	0/0	0/0	0/0	0/0	C|missense_variant|MODERATE|OS01G0158600|OS01G0158600|transcript|OS01T0158600-01|protein_coding|1/1|c.2689A>G|p.Thr897Ala|2790/3288|2689/3066|897/1021||,C|downstream_gene_variant|MODIFIER|OS01G0158566|OS01G0158566|transcript|OS01T0158566-00|protein_coding||c.*843T>C|||||480|WARNING_TRANSCRIPT_NO_START_CODON
chr01	3068466	G	A	19523.6	0/0	0/0	1/1	0/0	0/0	1/1	1/1	1/1	0/0	1/1	0/0	1/1	1/1	1/1	0/0	0/0	0/0	0/0	0/0	1/1	0/0	0/0	0/0	0/0	A|missense_variant|MODERATE|OS01G0158600|OS01G0158600|transcript|OS01T0158600-01|protein_coding|1/1|c.2671C>T|p.Pro891Ser|2772/3288|2671/3066|891/1021||,A|downstream_gene_variant|MODIFIER|OS01G0158566|OS01G0158566|transcript|OS01T0158566-00|protein_coding||c.*861G>A|||||498|WARNING_TRANSCRIPT_NO_START_CODON
chr01	3068544	G	T	21025.6	0/0	0/0	1/1	0/0	0/0	1/1	1/1	1/1	0/0	1/1	0/0	1/1	1/1	1/1	0/0	0/0	0/0	0/0	0/0	1/1	0/0	0/0	0/0	0/0	T|missense_variant|MODERATE|OS01G0158600|OS01G0158600|transcript|OS01T0158600-01|protein_coding|1/1|c.2593C>A|p.Leu865Ile|2694/3288|2593/3066|865/1021||,T|downstream_gene_variant|MODIFIER|OS01G0158566|OS01G0158566|transcript|OS01T0158566-00|protein_coding||c.*939G>T|||||576|WARNING_TRANSCRIPT_NO_START_CODON
chr01	3068609	G	A	20622.6	0/0	0/0	1|1	0/0	0/0	1|1	1|1	1|1	0/0	1|1	0/0	1|1	1|1	1|1	0/0	0/0	0/0	0/0	0/0	1|1	0/0	0/0	0/0	0/0	A|missense_variant|MODERATE|OS01G0158600|OS01G0158600|transcript|OS01T0158600-01|protein_coding|1/1|c.2528C>T|p.Thr843Ile|2629/3288|2528/3066|843/1021||,A|downstream_gene_variant|MODIFIER|OS01G0158566|OS01G0158566|transcript|OS01T0158566-00|protein_coding||c.*1004G>A|||||641|WARNING_TRANSCRIPT_NO_START_CODON
chr01	3068614	G	T	20581.6	0/0	0/0	1|1	0/0	0/0	1|1	1|1	1|1	0/0	1|1	0/0	1|1	1|1	1|1	0/0	0/0	0/0	0/0	0/0	1|1	0/0	0/0	0/0	0/0	T|missense_variant|MODERATE|OS01G0158600|OS01G0158600|transcript|OS01T0158600-01|protein_coding|1/1|c.2523C>A|p.Asp841Glu|2624/3288|2523/3066|841/1021||,T|downstream_gene_variant|MODIFIER|OS01G0158566|OS01G0158566|transcript|OS01T0158566-00|protein_coding||c.*1009G>T|||||646|WARNING_TRANSCRIPT_NO_START_CODON
chr01	3068617	C	A	20457.6	0/0	0/0	1|1	0/0	0/0	1|1	1|1	1|1	0/0	1|1	0/0	1|1	1|1	1|1	0/0	0/0	0/0	0/0	0/0	1|1	0/0	0/0	0/0	0/0	A|missense_variant|MODERATE|OS01G0158600|OS01G0158600|transcript|OS01T0158600-01|protein_coding|1/1|c.2520G>T|p.Met840Ile|2621/3288|2520/3066|840/1021||,A|downstream_gene_variant|MODIFIER|OS01G0158566|OS01G0158566|transcript|OS01T0158566-00|protein_coding||c.*1012C>A|||||649|WARNING_TRANSCRIPT_NO_START_CODON
chr01	3068618	A	G	20277.6	0/0	0/0	1|1	0/0	0/0	1|1	1|1	1|1	0/0	1|1	0/0	1|1	1|1	1|1	0/0	0/0	0/0	0/0	0/0	1|1	0/0	0/0	0/0	0/0	G|missense_variant|MODERATE|OS01G0158600|OS01G0158600|transcript|OS01T0158600-01|protein_coding|1/1|c.2519T>C|p.Met840Thr|2620/3288|2519/3066|840/1021||,G|downstream_gene_variant|MODIFIER|OS01G0158566|OS01G0158566|transcript|OS01T0158566-00|protein_coding||c.*1013A>G|||||650|WARNING_TRANSCRIPT_NO_START_CODON
chr01	3068619	T	A	20142.6	0/0	0/0	1|1	0/0	0/0	1|1	1|1	1|1	0/0	1|1	0/0	1|1	1|1	1|1	0/0	0/0	0/0	0/0	0/0	1|1	0/0	0/0	0/0	0/0	A|missense_variant|MODERATE|OS01G0158600|OS01G0158600|transcript|OS01T0158600-01|protein_coding|1/1|c.2518A>T|p.Met840Leu|2619/3288|2518/3066|840/1021||,A|downstream_gene_variant|MODIFIER|OS01G0158566|OS01G0158566|transcript|OS01T0158566-00|protein_coding||c.*1014T>A|||||651|WARNING_TRANSCRIPT_NO_START_CODON
chr01	3068645	A	T	18792.6	0/0	0/0	1|1	0/0	0/0	1|1	1|1	1|1	0/0	1|1	0/0	1|1	1|1	1|1	0/0	0/0	0/0	0/0	0/0	1|1	0/0	0/0	0/0	0/0	T|missense_variant|MODERATE|OS01G0158600|OS01G0158600|transcript|OS01T0158600-01|protein_coding|1/1|c.2492T>A|p.Phe831Tyr|2593/3288|2492/3066|831/1021||,T|downstream_gene_variant|MODIFIER|OS01G0158566|OS01G0158566|transcript|OS01T0158566-00|protein_coding||c.*1040A>T|||||677|WARNING_TRANSCRIPT_NO_START_CODON
chr01	3068652	A	AC	18657.6	0/0	0/0	1|1	0/0	0/0	1|1	1|1	1|1	0/0	1|1	0/0	1|1	1|1	1|1	0/0	0/0	0/0	0/0	0/0	1|1	0/0	0/0	0/0	0/0	AC|frameshift_variant|HIGH|OS01G0158600|OS01G0158600|transcript|OS01T0158600-01|protein_coding|1/1|c.2484_2485insG|p.Tyr829fs|2585/3288|2484/3066|828/1021||,AC|downstream_gene_variant|MODIFIER|OS01G0158566|OS01G0158566|transcript|OS01T0158566-00|protein_coding||c.*1047_*1048insC|||||685|WARNING_TRANSCRIPT_NO_START_CODON
chr01	3068656	CT	C	18387.6	0/0	0/0	1|1	0/0	0/0	1|1	1|1	1|1	0/0	1|1	0/0	1|1	1|1	1|1	0/0	0/0	0/0	0/0	0/0	1|1	0/0	0/0	0/0	0/0	C|frameshift_variant|HIGH|OS01G0158600|OS01G0158600|transcript|OS01T0158600-01|protein_coding|1/1|c.2480delA|p.Glu827fs|2581/3288|2480/3066|827/1021||,C|downstream_gene_variant|MODIFIER|OS01G0158566|OS01G0158566|transcript|OS01T0158566-00|protein_coding||c.*1052delT|||||689|WARNING_TRANSCRIPT_NO_START_CODON
chr01	3068659	C	A	17937.6	0/0	0/0	1|1	0/0	0/0	1|1	1|1	1|1	0/0	1|1	0/0	1|1	1|1	1|1	0/0	0/0	0/0	0/0	0/0	1|1	0/0	0/0	0/0	0/0	A|missense_variant|MODERATE|OS01G0158600|OS01G0158600|transcript|OS01T0158600-01|protein_coding|1/1|c.2478G>T|p.Met826Ile|2579/3288|2478/3066|826/1021||,A|downstream_gene_variant|MODIFIER|OS01G0158566|OS01G0158566|transcript|OS01T0158566-00|protein_coding||c.*1054C>A|||||691|WARNING_TRANSCRIPT_NO_START_CODON
chr01	3068661	T	G	18567.6	0/0	0/0	1|1	0/0	0/0	1|1	1|1	1|1	0/0	1|1	0/0	1|1	1|1	1|1	0/0	0/0	0/0	0/0	0/0	1|1	0/0	0/0	0/0	0/0	G|missense_variant|MODERATE|OS01G0158600|OS01G0158600|transcript|OS01T0158600-01|protein_coding|1/1|c.2476A>C|p.Met826Leu|2577/3288|2476/3066|826/1021||,G|downstream_gene_variant|MODIFIER|OS01G0158566|OS01G0158566|transcript|OS01T0158566-00|protein_coding||c.*1056T>G|||||693|WARNING_TRANSCRIPT_NO_START_CODON
chr01	3068667	G	T	18702.6	0/0	0/0	1|1	0/0	0/0	1|1	1|1	1|1	0/0	1|1	0/0	1|1	1|1	1|1	0/0	0/0	0/0	0/0	0/0	1|1	0/0	0/0	0/0	0/0	T|missense_variant|MODERATE|OS01G0158600|OS01G0158600|transcript|OS01T0158600-01|protein_coding|1/1|c.2470C>A|p.Pro824Thr|2571/3288|2470/3066|824/1021||,T|downstream_gene_variant|MODIFIER|OS01G0158566|OS01G0158566|transcript|OS01T0158566-00|protein_coding||c.*1062G>T|||||699|WARNING_TRANSCRIPT_NO_START_CODON
chr01	3068670	G	T	18477.6	0/0	0/0	1|1	0/0	0/0	1|1	1|1	1|1	0/0	1|1	0/0	1|1	1|1	1|1	0/0	0/0	0/0	0/0	0/0	1|1	0/0	0/0	0/0	0/0	T|missense_variant|MODERATE|OS01G0158600|OS01G0158600|transcript|OS01T0158600-01|protein_coding|1/1|c.2467C>A|p.Leu823Ile|2568/3288|2467/3066|823/1021||,T|downstream_gene_variant|MODIFIER|OS01G0158566|OS01G0158566|transcript|OS01T0158566-00|protein_coding||c.*1065G>T|||||702|WARNING_TRANSCRIPT_NO_START_CODON
chr01	3068675	T	A	18462.6	0/0	0/0	1|1	0/0	0/0	1|1	1|1	1|1	0/0	1|1	0/0	1|1	1|1	1|1	0/0	0/0	0/0	0/0	0/0	1|1	0/0	0/0	0/0	0/0	A|missense_variant|MODERATE|OS01G0158600|OS01G0158600|transcript|OS01T0158600-01|protein_coding|1/1|c.2462A>T|p.His821Leu|2563/3288|2462/3066|821/1021||,A|downstream_gene_variant|MODIFIER|OS01G0158566|OS01G0158566|transcript|OS01T0158566-00|protein_coding||c.*1070T>A|||||707|WARNING_TRANSCRIPT_NO_START_CODON
chr01	3068676	G	A	18372.6	0/0	0/0	1|1	0/0	0/0	1|1	1|1	1|1	0/0	1|1	0/0	1|1	1|1	1|1	0/0	0/0	0/0	0/0	0/0	1|1	0/0	0/0	0/0	0/0	A|missense_variant|MODERATE|OS01G0158600|OS01G0158600|transcript|OS01T0158600-01|protein_coding|1/1|c.2461C>T|p.His821Tyr|2562/3288|2461/3066|821/1021||,A|downstream_gene_variant|MODIFIER|OS01G0158566|OS01G0158566|transcript|OS01T0158566-00|protein_coding||c.*1071G>A|||||708|WARNING_TRANSCRIPT_NO_START_CODON
chr01	3068677	G	C	18147.6	0/0	0/0	1|1	0/0	0/0	1|1	1|1	1|1	0/0	1|1	0/0	1|1	1|1	1|1	0/0	0/0	0/0	0/0	0/0	1|1	0/0	0/0	0/0	0/0	C|missense_variant|MODERATE|OS01G0158600|OS01G0158600|transcript|OS01T0158600-01|protein_coding|1/1|c.2460C>G|p.Asp820Glu|2561/3288|2460/3066|820/1021||,C|downstream_gene_variant|MODIFIER|OS01G0158566|OS01G0158566|transcript|OS01T0158566-00|protein_coding||c.*1072G>C|||||709|WARNING_TRANSCRIPT_NO_START_CODON
chr01	3068694	A	C	17206.6	0/0	0/0	1/1	0/0	0/0	1/1	1/1	1/1	0/0	1/1	0/0	1/1	1/1	1/1	0/0	0/0	0/0	0/0	0/0	1/1	0/0	0/0	0/0	0/0	C|missense_variant|MODERATE|OS01G0158600|OS01G0158600|transcript|OS01T0158600-01|protein_coding|1/1|c.2443T>G|p.Leu815Val|2544/3288|2443/3066|815/1021||,C|downstream_gene_variant|MODIFIER|OS01G0158566|OS01G0158566|transcript|OS01T0158566-00|protein_coding||c.*1089A>C|||||726|WARNING_TRANSCRIPT_NO_START_CODON
chr01	3068706	T	C	19829.6	0/0	0/0	1|1	0/0	0/0	1|1	1|1	1|1	0/0	1|1	0/0	1|1	1|1	1|1	0/0	0/0	0/0	0/0	0/0	1|1	0/0	0/0	0/0	0/0	C|missense_variant|MODERATE|OS01G0158600|OS01G0158600|transcript|OS01T0158600-01|protein_coding|1/1|c.2431A>G|p.Lys811Glu|2532/3288|2431/3066|811/1021||,C|downstream_gene_variant|MODIFIER|OS01G0158566|OS01G0158566|transcript|OS01T0158566-00|protein_coding||c.*1101T>C|||||738|WARNING_TRANSCRIPT_NO_START_CODON
chr01	3068718	A	C	20638.6	0/0	0/0	1|1	0/0	0/0	1|1	1|1	1|1	0/0	1|1	0/0	1|1	1|1	1|1	0/0	0/0	0/0	0/0	0/0	1|1	0/0	0/0	0/0	0/0	C|missense_variant|MODERATE|OS01G0158600|OS01G0158600|transcript|OS01T0158600-01|protein_coding|1/1|c.2419T>G|p.Ser807Ala|2520/3288|2419/3066|807/1021||,C|downstream_gene_variant|MODIFIER|OS01G0158566|OS01G0158566|transcript|OS01T0158566-00|protein_coding||c.*1113A>C|||||750|WARNING_TRANSCRIPT_NO_START_CODON
chr01	3068728	G	C	21314.6	0/0	0/0	1|1	0/0	0/0	1|1	1|1	1|1	0/0	1|1	0/0	1|1	1|1	1|1	0/0	0/0	0/0	0/0	0/0	1|1	0/0	0/0	0/0	0/0	C|missense_variant|MODERATE|OS01G0158600|OS01G0158600|transcript|OS01T0158600-01|protein_coding|1/1|c.2409C>G|p.Asn803Lys|2510/3288|2409/3066|803/1021||,C|downstream_gene_variant|MODIFIER|OS01G0158566|OS01G0158566|transcript|OS01T0158566-00|protein_coding||c.*1123G>C|||||760|WARNING_TRANSCRIPT_NO_START_CODON
chr01	3068750	A	G	21151.6	0/0	0/0	1/1	0/0	0/0	1/1	1/1	1/1	0/0	1/1	0/0	1/1	1/1	1/1	0/0	0/0	0/0	0/0	0/0	1/1	0/0	0/0	0/0	0/0	G|missense_variant|MODERATE|OS01G0158600|OS01G0158600|transcript|OS01T0158600-01|protein_coding|1/1|c.2387T>C|p.Ile796Thr|2488/3288|2387/3066|796/1021||,G|downstream_gene_variant|MODIFIER|OS01G0158566|OS01G0158566|transcript|OS01T0158566-00|protein_coding||c.*1145A>G|||||782|WARNING_TRANSCRIPT_NO_START_CODON
chr01	3068762	T	C	21733.6	0/0	0/0	1/1	0/0	0/0	1/1	1/1	1/1	0/0	1/1	0/0	1/1	1/1	1/1	0/0	0/0	0/0	0/0	0/0	1/1	0/0	0/0	0/0	0/0	C|missense_variant|MODERATE|OS01G0158600|OS01G0158600|transcript|OS01T0158600-01|protein_coding|1/1|c.2375A>G|p.Lys792Arg|2476/3288|2375/3066|792/1021||,C|downstream_gene_variant|MODIFIER|OS01G0158566|OS01G0158566|transcript|OS01T0158566-00|protein_coding||c.*1157T>C|||||794|WARNING_TRANSCRIPT_NO_START_CODON
chr01	3068811	C	T	24362.6	0/0	0/0	1|1	0/0	0/0	1|1	1|1	1|1	0/0	1|1	0/0	1|1	1|1	1|1	0/0	0/0	0/0	0/0	0/0	1|1	0/0	0/0	0/0	0/0	T|missense_variant|MODERATE|OS01G0158600|OS01G0158600|transcript|OS01T0158600-01|protein_coding|1/1|c.2326G>A|p.Gly776Ser|2427/3288|2326/3066|776/1021||,T|downstream_gene_variant|MODIFIER|OS01G0158566|OS01G0158566|transcript|OS01T0158566-00|protein_coding||c.*1206C>T|||||843|WARNING_TRANSCRIPT_NO_START_CODON
chr01	3068819	TCCCC	T	24327.6	0/0	0/0	1|1	0/0	0/0	1|1	1|1	1|1	0/0	1|1	0/0	1|1	1|1	1|1	0/0	0/0	0/0	0/0	0/0	1|1	0/0	0/0	0/0	0/0	T|frameshift_variant|HIGH|OS01G0158600|OS01G0158600|transcript|OS01T0158600-01|protein_coding|1/1|c.2314_2317delGGGG|p.Gly772fs|2418/3288|2314/3066|772/1021||,T|downstream_gene_variant|MODIFIER|OS01G0158566|OS01G0158566|transcript|OS01T0158566-00|protein_coding||c.*1215_*1218delCCCC|||||852|WARNING_TRANSCRIPT_NO_START_CODON
chr01	3068826	GAGA	G	26217.6	0/0	0/0	1|1	0/0	0/0	1|1	1|1	1|1	0/0	1|1	0/0	1|1	1|1	1|1	0/0	0/0	0/0	0/0	0/0	1|1	0/0	0/0	0/0	0/0	G|conservative_inframe_deletion|MODERATE|OS01G0158600|OS01G0158600|transcript|OS01T0158600-01|protein_coding|1/1|c.2308_2310delTCT|p.Ser770del|2411/3288|2308/3066|770/1021||,G|downstream_gene_variant|MODIFIER|OS01G0158566|OS01G0158566|transcript|OS01T0158566-00|protein_coding||c.*1222_*1224delAGA|||||859|WARNING_TRANSCRIPT_NO_START_CODON
chr01	3068830	C	CAAAATGT	26037.6	0/0	0/0	1|1	0/0	0/0	1|1	1|1	1|1	0/0	1|1	0/0	1|1	1|1	1|1	0/0	0/0	0/0	0/0	0/0	1|1	0/0	0/0	0/0	0/0	CAAAATGT|frameshift_variant|HIGH|OS01G0158600|OS01G0158600|transcript|OS01T0158600-01|protein_coding|1/1|c.2306_2307insACATTTT|p.Ser770fs|2407/3288|2306/3066|769/1021||,CAAAATGT|downstream_gene_variant|MODIFIER|OS01G0158566|OS01G0158566|transcript|OS01T0158566-00|protein_coding||c.*1225_*1226insAAAATGT|||||863|WARNING_TRANSCRIPT_NO_START_CODON
chr01	3068839	A	T	25063.6	0/0	0/0	1|1	0/0	0/0	1|1	1|1	1|1	0/0	1|1	0/0	1|1	1|1	1|1	0/0	0/0	0/0	0/0	0/0	1|1	0/0	0/0	0/0	0/0	T|missense_variant|MODERATE|OS01G0158600|OS01G0158600|transcript|OS01T0158600-01|protein_coding|1/1|c.2298T>A|p.His766Gln|2399/3288|2298/3066|766/1021||,T|downstream_gene_variant|MODIFIER|OS01G0158566|OS01G0158566|transcript|OS01T0158566-00|protein_coding||c.*1234A>T|||||871|WARNING_TRANSCRIPT_NO_START_CODON
chr01	3068881	T	TGCA	20375.6	0/0	0/0	1|1	0/0	0/0	1|1	1|1	1|1	0/0	1|1	0/0	1|1	1|1	1|1	0/0	0/0	0/0	0/0	0/0	1|1	0/0	0/0	0/0	0/0	TGCA|disruptive_inframe_insertion|MODERATE|OS01G0158600|OS01G0158600|transcript|OS01T0158600-01|protein_coding|1/1|c.2255_2256insTGC|p.Lys752delinsAsnAla|2356/3288|2255/3066|752/1021||,TGCA|downstream_gene_variant|MODIFIER|OS01G0158566|OS01G0158566|transcript|OS01T0158566-00|protein_coding||c.*1276_*1277insGCA|||||914|WARNING_TRANSCRIPT_NO_START_CODON
chr01	3068883	TAC	T	20510.6	0/0	0/0	1|1	0/0	0/0	1|1	1|1	1|1	0/0	1|1	0/0	1|1	1|1	1|1	0/0	0/0	0/0	0/0	0/0	1|1	0/0	0/0	0/0	0/0	T|frameshift_variant|HIGH|OS01G0158600|OS01G0158600|transcript|OS01T0158600-01|protein_coding|1/1|c.2252_2253delGT|p.Arg751fs|2354/3288|2252/3066|751/1021||,T|downstream_gene_variant|MODIFIER|OS01G0158566|OS01G0158566|transcript|OS01T0158566-00|protein_coding||c.*1279_*1280delAC|||||916|WARNING_TRANSCRIPT_NO_START_CODON
chr01	3068886	GA	G	20348.6	0/0	0/0	1|1	0/0	0/0	1|1	1|1	1|1	0/0	1|1	0/0	1|1	1|1	1|1	0/0	0/0	0/0	0/0	0/0	1|1	0/0	0/0	0/0	0/0	G|frameshift_variant|HIGH|OS01G0158600|OS01G0158600|transcript|OS01T0158600-01|protein_coding|1/1|c.2250delT|p.Arg751fs|2351/3288|2250/3066|750/1021||,G|downstream_gene_variant|MODIFIER|OS01G0158566|OS01G0158566|transcript|OS01T0158566-00|protein_coding||c.*1282delA|||||919|WARNING_TRANSCRIPT_NO_START_CODON
chr01	3068895	C	T	19936.6	0/0	0/0	1|1	0/0	0/0	1|1	1|1	1|1	0/0	1|1	0/0	1|1	1|1	1|1	0/0	0/0	0/0	0/0	0/0	1|1	0/0	0/0	0/0	0/0	T|missense_variant|MODERATE|OS01G0158600|OS01G0158600|transcript|OS01T0158600-01|protein_coding|1/1|c.2242G>A|p.Gly748Ser|2343/3288|2242/3066|748/1021||,T|downstream_gene_variant|MODIFIER|OS01G0158566|OS01G0158566|transcript|OS01T0158566-00|protein_coding||c.*1290C>T|||||927|WARNING_TRANSCRIPT_NO_START_CODON
chr01	3068930	C	T	20020.6	0/0	0/0	1|1	0/0	0/0	1|1	1|1	1|1	0/0	1|1	0/0	1|1	1|1	1|1	0/0	0/0	0/0	0/0	0/0	1|1	0/0	0/0	0/0	0/0	T|missense_variant|MODERATE|OS01G0158600|OS01G0158600|transcript|OS01T0158600-01|protein_coding|1/1|c.2207G>A|p.Ser736Asn|2308/3288|2207/3066|736/1021||,T|downstream_gene_variant|MODIFIER|OS01G0158566|OS01G0158566|transcript|OS01T0158566-00|protein_coding||c.*1325C>T|||||962|WARNING_TRANSCRIPT_NO_START_CODON
chr01	3068937	T	C	20131.6	0/0	0/0	1|1	0/0	0/0	1|1	1|1	1|1	0/0	1|1	0/0	1|1	1|1	1|1	0/0	0/0	0/0	0/0	0/0	1|1	0/0	0/0	0/0	0/0	C|missense_variant|MODERATE|OS01G0158600|OS01G0158600|transcript|OS01T0158600-01|protein_coding|1/1|c.2200A>G|p.Ile734Val|2301/3288|2200/3066|734/1021||,C|downstream_gene_variant|MODIFIER|OS01G0158566|OS01G0158566|transcript|OS01T0158566-00|protein_coding||c.*1332T>C|||||969|WARNING_TRANSCRIPT_NO_START_CODON
chr01	3068940	T	C	20156.6	0/0	0/0	1|1	0/0	0/0	1|1	1|1	1|1	0/0	1|1	0/0	1|1	1|1	1|1	0/0	0/0	0/0	0/0	0/0	1|1	0/0	0/0	0/0	0/0	C|missense_variant|MODERATE|OS01G0158600|OS01G0158600|transcript|OS01T0158600-01|protein_coding|1/1|c.2197A>G|p.Asn733Asp|2298/3288|2197/3066|733/1021||,C|downstream_gene_variant|MODIFIER|OS01G0158566|OS01G0158566|transcript|OS01T0158566-00|protein_coding||c.*1335T>C|||||972|WARNING_TRANSCRIPT_NO_START_CODON
chr01	3068955	T	A	19401.6	0/0	0/0	1|1	0/0	0/0	1|1	1|1	1|1	0/0	1|1	0/0	1|1	1|1	1|1	0/0	0/0	0/0	0/0	0/0	1|1	0/0	0/0	0/0	0/0	A|missense_variant|MODERATE|OS01G0158600|OS01G0158600|transcript|OS01T0158600-01|protein_coding|1/1|c.2182A>T|p.Asn728Tyr|2283/3288|2182/3066|728/1021||,A|downstream_gene_variant|MODIFIER|OS01G0158566|OS01G0158566|transcript|OS01T0158566-00|protein_coding||c.*1350T>A|||||987|WARNING_TRANSCRIPT_NO_START_CODON
chr01	3068964	C	A	19081.6	0/0	0/0	1|1	0/0	0/0	1|1	1|1	1|1	0/0	1|1	0/0	1|1	1|1	1|1	0/0	0/0	0/0	0/0	0/0	1|1	0/0	0/0	0/0	0/0	A|missense_variant|MODERATE|OS01G0158600|OS01G0158600|transcript|OS01T0158600-01|protein_coding|1/1|c.2173G>T|p.Val725Phe|2274/3288|2173/3066|725/1021||,A|downstream_gene_variant|MODIFIER|OS01G0158566|OS01G0158566|transcript|OS01T0158566-00|protein_coding||c.*1359C>A|||||996|WARNING_TRANSCRIPT_NO_START_CODON
chr01	3068985	T	G	17630.6	0/0	0/0	1|1	0/0	0/0	1|1	1|1	1|1	0/0	1|1	0/0	1|1	1|1	1|1	0/0	0/0	0/0	0/0	0/0	1|1	0/0	0/0	0/0	0/0	G|missense_variant|MODERATE|OS01G0158600|OS01G0158600|transcript|OS01T0158600-01|protein_coding|1/1|c.2152A>C|p.Lys718Gln|2253/3288|2152/3066|718/1021||,G|downstream_gene_variant|MODIFIER|OS01G0158566|OS01G0158566|transcript|OS01T0158566-00|protein_coding||c.*1380T>G|||||1017|WARNING_TRANSCRIPT_NO_START_CODON
chr01	3068996	A	C	16252.6	0/0	0/0	1|1	0/0	0/0	1|1	1|1	1|1	0/0	1|1	0/0	1|1	1|1	1|1	0/0	0/0	0/0	0/0	0/0	1|1	0/0	0/0	0/0	0/0	C|missense_variant|MODERATE|OS01G0158600|OS01G0158600|transcript|OS01T0158600-01|protein_coding|1/1|c.2141T>G|p.Leu714Trp|2242/3288|2141/3066|714/1021||,C|downstream_gene_variant|MODIFIER|OS01G0158566|OS01G0158566|transcript|OS01T0158566-00|protein_coding||c.*1391A>C|||||1028|WARNING_TRANSCRIPT_NO_START_CODON
chr01	3069010	A	AAT	13212.6	0/0	0/0	1|1	0/0	0/0	1|1	1|1	1|1	0/0	1|1	0/0	1|1	1|1	1|1	0/0	0/0	0/0	0/0	0/0	1|1	0/0	0/0	0/0	0/0	AAT|frameshift_variant|HIGH|OS01G0158600|OS01G0158600|transcript|OS01T0158600-01|protein_coding|1/1|c.2126_2127insAT|p.Asp709fs|2227/3288|2126/3066|709/1021||,AAT|downstream_gene_variant|MODIFIER|OS01G0158566|OS01G0158566|transcript|OS01T0158566-00|protein_coding||c.*1405_*1406insAT|||||1043|WARNING_TRANSCRIPT_NO_START_CODON
chr01	3069096	G	GA	15009.2	0/0	0/0	1|1	0/0	0/0	1|1	./.	1/1	0/0	1|1	0/0	1|1	.	1|1	0/0	0/0	0/0	0/0	0/0	1|1	0/0	0/0	0/0	0/0	GA|frameshift_variant|HIGH|OS01G0158600|OS01G0158600|transcript|OS01T0158600-01|protein_coding|1/1|c.2040_2041insT|p.Leu681fs|2141/3288|2040/3066|680/1021||,GA|downstream_gene_variant|MODIFIER|OS01G0158566|OS01G0158566|transcript|OS01T0158566-00|protein_coding||c.*1491_*1492insA|||||1129|WARNING_TRANSCRIPT_NO_START_CODON
chr01	3069097	T	TA	15279	0/0	0/0	1|1	0/0	0/0	1|1	.	1|1	0/0	1|1	0/0	1|1	.	1|1	0/0	0/0	0/0	0/0	0/0	1|1	0/0	0/0	0/0	0/0	TA|frameshift_variant|HIGH|OS01G0158600|OS01G0158600|transcript|OS01T0158600-01|protein_coding|1/1|c.2039_2040insT|p.Lys680fs|2140/3288|2039/3066|680/1021||,TA|downstream_gene_variant|MODIFIER|OS01G0158566|OS01G0158566|transcript|OS01T0158566-00|protein_coding||c.*1492_*1493insA|||||1130|WARNING_TRANSCRIPT_NO_START_CODON
chr01	3069100	GTC	G	14607.6	0/0	0/0	1|1	0/0	0/0	1|1	1/1	1/1	0/0	1|1	0/0	1|1	1|1	1|1	0/0	0/0	0/0	0/0	0/0	1|1	0/0	0/0	0/0	0/0	G|frameshift_variant|HIGH|OS01G0158600|OS01G0158600|transcript|OS01T0158600-01|protein_coding|1/1|c.2035_2036delGA|p.Asp679fs|2137/3288|2035/3066|679/1021||,G|downstream_gene_variant|MODIFIER|OS01G0158566|OS01G0158566|transcript|OS01T0158566-00|protein_coding||c.*1496_*1497delTC|||||1133|WARNING_TRANSCRIPT_NO_START_CODON
chr01	3069105	C	G	14562.6	0/0	0/0	1|1	0/0	0/0	1|1	1|1	1|1	0/0	1|1	0/0	1|1	1|1	1|1	0/0	0/0	0/0	0/0	0/0	1|1	0/0	0/0	0/0	0/0	G|missense_variant|MODERATE|OS01G0158600|OS01G0158600|transcript|OS01T0158600-01|protein_coding|1/1|c.2032G>C|p.Val678Leu|2133/3288|2032/3066|678/1021||,G|downstream_gene_variant|MODIFIER|OS01G0158566|OS01G0158566|transcript|OS01T0158566-00|protein_coding||c.*1500C>G|||||1137|WARNING_TRANSCRIPT_NO_START_CODON
chr01	3069108	C	T	14787.6	0/0	0/0	1|1	0/0	0/0	1|1	1/1	1|1	0/0	1|1	0/0	1|1	1|1	1|1	0/0	0/0	0/0	0/0	0/0	1|1	0/0	0/0	0/0	0/0	T|missense_variant|MODERATE|OS01G0158600|OS01G0158600|transcript|OS01T0158600-01|protein_coding|1/1|c.2029G>A|p.Asp677Asn|2130/3288|2029/3066|677/1021||,T|downstream_gene_variant|MODIFIER|OS01G0158566|OS01G0158566|transcript|OS01T0158566-00|protein_coding||c.*1503C>T|||||1140|WARNING_TRANSCRIPT_NO_START_CODON
chr01	3069109	C	A	14922.6	0/0	0/0	1|1	0/0	0/0	1|1	1|1	1|1	0/0	1|1	0/0	1|1	1|1	1|1	0/0	0/0	0/0	0/0	0/0	1|1	0/0	0/0	0/0	0/0	A|missense_variant|MODERATE|OS01G0158600|OS01G0158600|transcript|OS01T0158600-01|protein_coding|1/1|c.2028G>T|p.Glu676Asp|2129/3288|2028/3066|676/1021||,A|downstream_gene_variant|MODIFIER|OS01G0158566|OS01G0158566|transcript|OS01T0158566-00|protein_coding||c.*1504C>A|||||1141|WARNING_TRANSCRIPT_NO_START_CODON
chr01	3069112	T	C	15024.6	0/0	0/0	1|1	0/0	0/0	1|1	1/1	1|1	0/0	1|1	0/0	1|1	1|1	1|1	0/0	0/0	0/0	0/0	0/0	1|1	0/0	0/0	0/0	0/0	C|missense_variant|MODERATE|OS01G0158600|OS01G0158600|transcript|OS01T0158600-01|protein_coding|1/1|c.2025A>G|p.Ile675Met|2126/3288|2025/3066|675/1021||,C|downstream_gene_variant|MODIFIER|OS01G0158566|OS01G0158566|transcript|OS01T0158566-00|protein_coding||c.*1507T>C|||||1144|WARNING_TRANSCRIPT_NO_START_CODON
chr01	3069132	A	T	18858.6	0/0	0/0	1|1	0/0	0/0	1|1	1|1	1|1	0/0	1|1	0/0	1|1	1|1	1|1	0/0	0/0	0/0	0/0	0/0	1|1	0/0	0/0	0/0	0/0	T|missense_variant|MODERATE|OS01G0158600|OS01G0158600|transcript|OS01T0158600-01|protein_coding|1/1|c.2005T>A|p.Ser669Thr|2106/3288|2005/3066|669/1021||,T|downstream_gene_variant|MODIFIER|OS01G0158566|OS01G0158566|transcript|OS01T0158566-00|protein_coding||c.*1527A>T|||||1164|WARNING_TRANSCRIPT_NO_START_CODON
chr01	3069162	G	T	21236.6	0/0	0/0	1|1	0/0	0/0	1|1	1|1	1|1	0/0	1|1	0/0	1|1	1|1	1|1	0/0	0/0	0/0	0/0	0/0	1|1	0/0	0/0	0/0	0/0	T|missense_variant|MODERATE|OS01G0158600|OS01G0158600|transcript|OS01T0158600-01|protein_coding|1/1|c.1975C>A|p.Leu659Ile|2076/3288|1975/3066|659/1021||,T|downstream_gene_variant|MODIFIER|OS01G0158566|OS01G0158566|transcript|OS01T0158566-00|protein_coding||c.*1557G>T|||||1194|WARNING_TRANSCRIPT_NO_START_CODON
chr01	3069176	A	G	20853.6	0/0	0/0	1|1	0/0	0/0	1|1	1|1	1|1	0/0	1|1	0/0	1|1	1|1	1|1	0/0	0/0	0/0	0/0	0/0	1|1	0/0	0/0	0/0	0/0	G|missense_variant|MODERATE|OS01G0158600|OS01G0158600|transcript|OS01T0158600-01|protein_coding|1/1|c.1961T>C|p.Met654Thr|2062/3288|1961/3066|654/1021||,G|downstream_gene_variant|MODIFIER|OS01G0158566|OS01G0158566|transcript|OS01T0158566-00|protein_coding||c.*1571A>G|||||1208|WARNING_TRANSCRIPT_NO_START_CODON
chr01	3069194	G	T	18837.6	0/0	0/0	1|1	0/0	0/0	1|1	1|1	1|1	0/0	1|1	0/0	1|1	1|1	1|1	0/0	0/0	0/0	0/0	0/0	1|1	0/0	0/0	0/0	0/0	T|missense_variant|MODERATE|OS01G0158600|OS01G0158600|transcript|OS01T0158600-01|protein_coding|1/1|c.1943C>A|p.Pro648Gln|2044/3288|1943/3066|648/1021||,T|downstream_gene_variant|MODIFIER|OS01G0158566|OS01G0158566|transcript|OS01T0158566-00|protein_coding||c.*1589G>T|||||1226|WARNING_TRANSCRIPT_NO_START_CODON
chr01	3069203	C	T	17769.6	0/0	0/0	1|1	0/0	0/0	1|1	1|1	1|1	0/0	1|1	0/0	1|1	1|1	1|1	0/0	0/0	0/0	0/0	0/0	1|1	0/0	0/0	0/0	0/0	T|missense_variant|MODERATE|OS01G0158600|OS01G0158600|transcript|OS01T0158600-01|protein_coding|1/1|c.1934G>A|p.Arg645Lys|2035/3288|1934/3066|645/1021||,T|downstream_gene_variant|MODIFIER|OS01G0158566|OS01G0158566|transcript|OS01T0158566-00|protein_coding||c.*1598C>T|||||1235|WARNING_TRANSCRIPT_NO_START_CODON
chr01	3069224	C	G	14544.6	0/0	0/0	1/1	0/0	0/0	1/1	1/1	1/1	0/0	1/1	0/0	1/1	1/1	1/1	0/0	0/0	0/0	0/0	0/0	1/1	0/0	0/0	0/0	0/0	G|missense_variant|MODERATE|OS01G0158600|OS01G0158600|transcript|OS01T0158600-01|protein_coding|1/1|c.1913G>C|p.Gly638Ala|2014/3288|1913/3066|638/1021||,G|downstream_gene_variant|MODIFIER|OS01G0158566|OS01G0158566|transcript|OS01T0158566-00|protein_coding||c.*1619C>G|||||1256|WARNING_TRANSCRIPT_NO_START_CODON
chr01	3069247	A	T	11862.6	0/0	0/0	1|1	0/0	0/0	1|1	1|1	1|1	0/0	1|1	0/0	1|1	1|1	1|1	0/0	0/0	0/0	0/0	0/0	1|1	0/0	0/0	0/0	0/0	T|missense_variant|MODERATE|OS01G0158600|OS01G0158600|transcript|OS01T0158600-01|protein_coding|1/1|c.1890T>A|p.Ser630Arg|1991/3288|1890/3066|630/1021||,T|downstream_gene_variant|MODIFIER|OS01G0158566|OS01G0158566|transcript|OS01T0158566-00|protein_coding||c.*1642A>T|||||1279|WARNING_TRANSCRIPT_NO_START_CODON
chr01	3069248	C	T	11772.6	0/0	0/0	1|1	0/0	0/0	1|1	1|1	1|1	0/0	1|1	0/0	1|1	1|1	1|1	0/0	0/0	0/0	0/0	0/0	1|1	0/0	0/0	0/0	0/0	T|missense_variant|MODERATE|OS01G0158600|OS01G0158600|transcript|OS01T0158600-01|protein_coding|1/1|c.1889G>A|p.Ser630Asn|1990/3288|1889/3066|630/1021||,T|downstream_gene_variant|MODIFIER|OS01G0158566|OS01G0158566|transcript|OS01T0158566-00|protein_coding||c.*1643C>T|||||1280|WARNING_TRANSCRIPT_NO_START_CODON
chr01	3069255	A	G	10872.6	0/0	0/0	1|1	0/0	0/0	1|1	1|1	1|1	0/0	1|1	0/0	1|1	1|1	1|1	0/0	0/0	0/0	0/0	0/0	1|1	0/0	0/0	0/0	0/0	G|missense_variant|MODERATE|OS01G0158600|OS01G0158600|transcript|OS01T0158600-01|protein_coding|1/1|c.1882T>C|p.Tyr628His|1983/3288|1882/3066|628/1021||,G|downstream_gene_variant|MODIFIER|OS01G0158566|OS01G0158566|transcript|OS01T0158566-00|protein_coding||c.*1650A>G|||||1287|WARNING_TRANSCRIPT_NO_START_CODON
chr01	3069257	T	G	10692.6	0/0	0/0	1|1	0/0	0/0	1|1	1|1	1|1	0/0	1|1	0/0	1|1	1|1	1|1	0/0	0/0	0/0	0/0	0/0	1|1	0/0	0/0	0/0	0/0	G|missense_variant|MODERATE|OS01G0158600|OS01G0158600|transcript|OS01T0158600-01|protein_coding|1/1|c.1880A>C|p.Asn627Thr|1981/3288|1880/3066|627/1021||,G|downstream_gene_variant|MODIFIER|OS01G0158566|OS01G0158566|transcript|OS01T0158566-00|protein_coding||c.*1652T>G|||||1289|WARNING_TRANSCRIPT_NO_START_CODON
[truncated: 30,302 more rows]
