# Supplementary material for: Genomic Variation in Korean japonica Rice Varieties
Source: Genes (Basel). 2021 Oct 30;12(11):1749. doi: 10.3390/genes12111749 (PMC8623644; doi:10.3390/genes12111749)
Supplement: Supplementary file 1 [file genes-12-01749-s001.zip › TableS6_high_modearate_impact_variants_in_agri_genes.xlsx]

## Sheet: Sheet1
Table S6. Information about Variants with High or Moderate Effects on Gene Function in Well-known Agronomically Important Genes.
Gene name	Chromosome	Position (bp)	Reference allele	Alternative allele	Quality	Genotype of varieties (0: reference allele, 1: the first alternative allele, 2: the second alternative allele, 3: the third alternative allele, etc.., /: not-phased genotype, |: phased genotype, ./.: missing genotype)																								Annotation
						Cheongho	Dami	Dongan	Dongjin	Giho	Haechanmulgyeol	Hiami	Hwacheong	Hwayeong	Ilpum	Jinbu43	Jopyeong	Joun	Junam	Nampyeong	Odae	Saeilmi	Saenuri	Samgwang	Seogan	Seomyeong	Sindongjin	Sobi	Unbong40
OsWD40-19	chr01	24706896	G	T	11374.3	1/1	0/0	0/0	0/0	0/0	0/0	0/0	0/0	0/0	0/0	0/0	0/0	0/0	0/0	1/1	0/0	0/0	1/1	0/0	0/0	1/1	0/0	0/0	0/0	T|missense_variant|MODERATE|OS01G0620100|OS01G0620100|transcript|OS01T0620100-01|protein_coding|3/8|c.325C>A|p.His109Asn|455/1259|325/975|109/324||
OsWD40-19	chr01	24708086	T	C	12888.3	1|1	0/0	0/0	0/0	0/0	0/0	0/0	0/0	0/0	0/0	0/0	0/0	0/0	0/0	1|1	0/0	0/0	1|1	0/0	0/0	1|1	0/0	0/0	0/0	C|missense_variant|MODERATE|OS01G0620100|OS01G0620100|transcript|OS01T0620100-01|protein_coding|2/8|c.157A>G|p.Lys53Glu|287/1259|157/975|53/324||
RD	chr01	25383230	G	A	1438.8	0/0	0/0	0/0	0/0	0/0	0/0	1/1	0/0	0/0	0/0	0/0	0/0	0/0	0/0	0/0	1/1	0/0	0/0	0/0	0/0	0/0	0/0	0/0	0/0	A|missense_variant|MODERATE|OS01G0633500|OS01G0633500|transcript|OS01T0633500-00|protein_coding|2/3|c.136G>A|p.Val46Ile|405/1466|136/954|46/317||WARNING_TRANSCRIPT_NO_START_CODON
RD	chr01	25383863	G	A	2169.79	0/0	0/0	0/0	0/0	0/0	0/0	1/1	0/0	0/0	0/0	0/0	0/0	0/0	0/0	0/0	1/1	0/0	0/0	0/0	0/0	0/0	0/0	0/0	0/0	A|missense_variant|MODERATE|OS01G0633500|OS01G0633500|transcript|OS01T0633500-00|protein_coding|3/3|c.382G>A|p.Gly128Arg|651/1466|382/954|128/317||WARNING_TRANSCRIPT_NO_START_CODON
RD	chr01	25384262	G	A	1180.79	0/0	0/0	0/0	0/0	0/0	0/0	1/1	0/0	0/0	0/0	0/0	0/0	0/0	0/0	0/0	1/1	0/0	0/0	0/0	0/0	0/0	0/0	0/0	0/0	A|missense_variant|MODERATE|OS01G0633500|OS01G0633500|transcript|OS01T0633500-00|protein_coding|3/3|c.781G>A|p.Ala261Thr|1050/1466|781/954|261/317||WARNING_TRANSCRIPT_NO_START_CODON
HESO1	chr01	36355847	G	A	35939.6	0/0	1/1	1/1	1/1	0/0	1/1	0/0	0/0	1/1	0/0	0/0	0/0	0/0	1/1	1/1	0/0	1/1	1/1	1/1	0/0	1/1	1/1	1/1	0/0	A|missense_variant|MODERATE|OS01G0846450|OS01G0846450|transcript|OS01T0846450-01|protein_coding|4/8|c.328G>A|p.Val110Ile|615/2388|328/621|110/206||,A|upstream_gene_variant|MODIFIER|EPlOSAG00000012430|EPlOSAG00000012430|transcript|EPlOSAT00000013818|lincRNA||n.-602G>A|||||602|
SD1	chr01	38382746	G	T	1861.06	0/0	0/0	0/0	0/0	0/0	0/0	0/0	0/0	0/0	0/0	0/0	0/0	0/0	0/0	0/0	0/0	0/0	0/0	0/0	0/0	1/1	0/0	0/0	0/0	T|missense_variant|MODERATE|20OX2|OS01G0883800|transcript|OS01T0883800-02|protein_coding|1/3|c.281G>T|p.Gly94Val|281/1170|281/1170|94/389||,T|synonymous_variant|LOW|OS01G0883850|OS01G0883850|transcript|OS01T0883850-00|protein_coding|1/1|c.303C>A|p.Thr101Thr|613/773|303/463|101/153||WARNING_TRANSCRIPT_INCOMPLETE,T|synonymous_variant|LOW|20OX2|OS01G0883800|transcript|OS01T0883800-01|protein_coding|…
SD1	chr01	38385083	G	C	16269.9	0/0	0/0	0/0	0/0	0/0	0/0	0/0	0/0	0/0	1|1	0/0	1|1	0/0	1|1	0/0	1|1	0/0	0/0	0/0	1|1	0/0	0/0	0/0	0/0	C|missense_variant|MODERATE|20OX2|OS01G0883800|transcript|OS01T0883800-02|protein_coding|3/3|c.1045G>C|p.Asp349His|1045/1170|1045/1170|349/389||,C|missense_variant|MODERATE|20OX2|OS01G0883800|transcript|OS01T0883800-01|protein_coding|3/3|c.844G>C|p.Asp282His|846/1232|844/969|282/322||WARNING_TRANSCRIPT_NO_START_CODON,C|upstream_gene_variant|MODIFIER|OS01G0883850|OS01G0883850|transcript|OS01T08838…
SMG1	chr02	33443801	T	A	3309.8	0/0	0/0	0/0	0/0	0/0	0/0	0/0	0/0	0/0	0/0	1/1	1/1	0/0	0/0	0/0	0/0	0/0	0/0	0/0	0/0	0/0	0/0	0/0	0/0	A|missense_variant|MODERATE|OS02G0787300|OS02G0787300|transcript|OS02T0787300-01|protein_coding|1/1|c.41A>T|p.Gln14Leu|148/1879|41/1110|14/369||
GS3	chr03	16733441	G	T	6399.73	0/0	1/1	0/0	0/0	0/0	0/0	0/0	0/0	0/0	0/0	0/0	0/0	0/0	0/0	0/0	0/0	0/0	0/0	0/0	0/0	0/0	1/1	1/1	0/0	T|stop_gained|HIGH|OS03G0407400|OS03G0407400|transcript|OS03T0407400-00|protein_coding|2/5|c.165C>A|p.Cys55*|197/945|165/699|55/232||,T|downstream_gene_variant|MODIFIER|EPlOSAG00000015917|EPlOSAG00000015917|transcript|EPlOSAT00000017305|lincRNA||n.*1366G>T|||||1366|
Hd6	chr03	31512460	A	T	1653.06	0/0	0/0	0/0	0/0	0/0	0/0	0/0	0/0	0/0	0/0	0/0	0/0	0/0	0/0	0/0	1/1	0/0	0/0	0/0	0/0	0/0	0/0	0/0	0/0	T|stop_lost|HIGH|OS03G0762000|OS03G0762000|transcript|OS03T0762000-01|protein_coding|3/4|c.436T>A|p.Ter146Lysext*?|493/767|436/438|146/145||,T|stop_lost|HIGH|OS03G0762000|OS03G0762000|transcript|OS03T0762000-02|protein_coding|3/10|c.271T>A|p.Ter91Lysext*?|555/1474|271/273|91/90||
Pi21	chr04	19836057	T	G	25481.9	0/0	1/1	0/0	1/1	1/1	1|1	0/0	1/1	1/1	1/1	0/0	1/1	1/1	1/1	0/0	1/1	0/0	0/0	1/1	1/1	1/1	1/1	1/1	0/0	G|missense_variant|MODERATE|OS04G0401000|OS04G0401000|transcript|OS04T0401000-01|protein_coding|3/3|c.245A>C|p.Gln82Pro|332/1183|245/801|82/266||,G|missense_variant|MODERATE|OS04G0401000|OS04G0401000|transcript|OS04T0401000-02|protein_coding|3/4|c.245A>C|p.Gln82Pro|326/1007|245/633|82/210||
NAL1	chr04	31212801	A	G	3116.79	1/1	0/0	0/0	0/0	0/0	0/0	1/1	0/0	0/0	0/0	0/0	0/0	0/0	0/0	0/0	0/0	0/0	0/0	0/0	0/0	0/0	0/0	0/0	0/0	G|missense_variant|MODERATE|OS04G0615000|OS04G0615000|transcript|OS04T0615000-01|protein_coding|1/1|c.122A>G|p.His41Arg|637/2575|122/297|41/98||WARNING_TRANSCRIPT_NO_START_CODON,G|upstream_gene_variant|MODIFIER|EPlOSAG00000040833|EPlOSAG00000040833|transcript|EPlOSAT00000042221|lincRNA||n.-125T>C|||||125|,G|downstream_gene_variant|MODIFIER|EPlOSAG00000039059|EPlOSAG00000039059|transcript|EPlOSAT0…
HD3B	chr06	2235191	A	G	630.06	0/0	0/0	0/0	0/0	0/0	0/0	1/1	0/0	0/0	0/0	0/0	0/0	0/0	0/0	0/0	0/0	0/0	0/0	0/0	0/0	0/0	0/0	0/0	0/0	G|missense_variant|MODERATE|OS06G0142600|OS06G0142600|transcript|OS06T0142600-01|protein_coding|3/3|c.773T>C|p.Leu258Ser|773/1808|773/1383|258/460||WARNING_TRANSCRIPT_NO_START_CODON,G|upstream_gene_variant|MODIFIER|OS06G0142550|OS06G0142550|transcript|OS06T0142550-00|lincRNA||n.-1467T>C|||||1467|
Hd1	chr06	9336985	G	A	3646.1	0/0	0/0	0/0	0/0	0/0	0/0	0/0	0/0	0/0	0/0	./.	1|1	0/0	0/0	0/0	1|1	0/0	0/0	0/0	0/0	0/0	0/0	0/0	0/0	A|missense_variant|MODERATE|HD1|OS06G0275000|transcript|OS06T0275000-01|protein_coding|1/2|c.451G>A|p.Asp151Asn|610/1557|451/1188|151/395||,A|synonymous_variant|LOW|OS06G0274950|OS06G0274950|transcript|OS06T0274950-01|protein_coding|2/2|c.180C>T|p.Val60Val|1013/1639|180/792|60/263||,A|downstream_gene_variant|MODIFIER|EPlOSAG00000014889|EPlOSAG00000014889|transcript|EPlOSAT00000016277|lincRNA||n.*…
Hd1	chr06	9337236	TGTGGTACCTTCACAGATCACAATGCTGAGTGAGCAGCAGCATA	T	1149.79	0/0	0/0	0/0	0/0	0/0	0/0	0/0	0/0	0/0	0/0	0/0	0/0	1/1	0/0	0/0	0/0	0/0	0/0	0/0	0/0	0/0	0/0	0/0	1/1	T|frameshift_variant|HIGH|HD1|OS06G0275000|transcript|OS06T0275000-01|protein_coding|1/2|c.708_750delACCTTCACAGATCACAATGCTGAGTGAGCAGCAGCATAGTGGT|p.Pro237fs|867/1557|708/1188|236/395||INFO_REALIGN_3_PRIME,T|5_prime_UTR_variant|MODIFIER|OS06G0274950|OS06G0274950|transcript|OS06T0274950-01|protein_coding|2/2|c.-115_-73delTATGCTGCTGCTCACTCAGCATTGTGATCTGTGAAGGTACCAC|||||73|,T|downstream_gene_variant|M…
Hd1	chr06	9338004	CTT	C	6505.73	0/0	0/0	0/0	0/0	0/0	0/0	0/0	0/0	0/0	0/0	1/1	1/1	0/0	0/0	0/0	1/1	0/0	0/0	0/0	0/0	0/0	0/0	0/0	0/0	C|frameshift_variant|HIGH|HD1|OS06G0275000|transcript|OS06T0275000-01|protein_coding|2/2|c.835_836delTT|p.Phe279fs|994/1557|835/1188|279/395||INFO_REALIGN_3_PRIME,C|5_prime_UTR_variant|MODIFIER|OS06G0274950|OS06G0274950|transcript|OS06T0274950-01|protein_coding|1/2|c.-205_-204delAA|||||841|
Hd1	chr06	9338068	A	C	5434.73	0/0	0/0	0/0	0/0	0/0	0/0	0/0	0/0	0/0	0/0	1/1	1/1	0/0	0/0	0/0	1/1	0/0	0/0	0/0	0/0	0/0	0/0	0/0	0/0	C|missense_variant|MODERATE|HD1|OS06G0275000|transcript|OS06T0275000-01|protein_coding|2/2|c.897A>C|p.Arg299Ser|1056/1557|897/1188|299/395||,C|5_prime_UTR_premature_start_codon_gain_variant|LOW|OS06G0274950|OS06G0274950|transcript|OS06T0274950-01|protein_coding|1/2|c.-267T>G||||||,C|5_prime_UTR_variant|MODIFIER|OS06G0274950|OS06G0274950|transcript|OS06T0274950-01|protein_coding|1/2|c.-267T>G|||||…
Hd1	chr06	9338330	G	A	6894.73	0/0	0/0	0/0	0/0	0/0	0/0	0/0	0/0	0/0	0/0	1/1	1/1	0/0	0/0	0/0	1/1	0/0	0/0	0/0	0/0	0/0	0/0	0/0	0/0	A|missense_variant|MODERATE|HD1|OS06G0275000|transcript|OS06T0275000-01|protein_coding|2/2|c.1159G>A|p.Gly387Ser|1318/1557|1159/1188|387/395||,A|5_prime_UTR_premature_start_codon_gain_variant|LOW|OS06G0274950|OS06G0274950|transcript|OS06T0274950-01|protein_coding|1/2|c.-529C>T||||||,A|5_prime_UTR_variant|MODIFIER|OS06G0274950|OS06G0274950|transcript|OS06T0274950-01|protein_coding|1/2|c.-529C>T|||…
BZR1	chr07	23485222	C	CCCG	1210.83	0/0	0/0	0/0	0/0	0/0	0/0	0/0	0/0	0/0	0/0	1/1	0/0	0/0	0/0	0/0	1/1	0/0	0/0	0/0	0/0	0/0	0/0	0/0	0/0	CCCG|conservative_inframe_insertion|MODERATE|BZR1|OS07G0580500|transcript|OS07T0580500-01|protein_coding|1/2|c.23_25dupCGG|p.Ala8dup|85/1206|25/897|9/298||,CCCG|upstream_gene_variant|MODIFIER|EPlOSAG00000003598|EPlOSAG00000003598|transcript|EPlOSAT00000004986|lincRNA||n.-1434_-1433insCCG|||||1433|
Hd18	chr08	2388554	T	C	13956.4	0/0	0/0	0/0	0/0	1/1	0/0	0/0	1/1	0/0	0/0	0/0	1/1	1/1	0/0	1/1	0/0	0/0	0/0	1/1	0/0	1/1	0/0	0/0	0/0	C|missense_variant|MODERATE|OS08G0143400|OS08G0143400|transcript|OS08T0143400-01|protein_coding|1/2|c.673A>G|p.Thr225Ala|723/2719|673/2292|225/763||,C|missense_variant|MODERATE|OS08G0143400|OS08G0143400|transcript|OS08T0143400-02|protein_coding|2/3|c.457A>G|p.Thr153Ala|483/2263|457/2076|153/691||,C|upstream_gene_variant|MODIFIER|OS08G0143500|OS08G0143500|transcript|OS08T0143500-01|protein_coding|…
GATA28	chr11	4433087	T	TGCC	5875.83	0/0	0/0	0/0	0/0	0/0	0/0	0/0	0/0	0/0	0/0	0/0	0/0	0/0	0/0	1|1	0/0	0/0	1|1	0/0	0/0	0/0	0/0	0/0	0/0	TGCC|conservative_inframe_insertion|MODERATE|OS11G0187200|OS11G0187200|transcript|OS11T0187200-00|protein_coding|1/1|c.984_985insGGC|p.Ala328_Thr329insGly|1001/1344|984/1296|328/431||,TGCC|upstream_gene_variant|MODIFIER|OS11G0187100|OS11G0187100|transcript|OS11T0187100-00|protein_coding||c.-1684_-1683insGGC|||||1684|,TGCC|downstream_gene_variant|MODIFIER|OS11G0187150|OS11G0187150|transcript|OS11T…
GATA28	chr11	4433090	C	CGGA	6053.83	0/0	0/0	0/0	0/0	0/0	0/0	0/0	0/0	0/0	0/0	0/0	0/0	0/0	0/0	1|1	0/0	0/0	1|1	0/0	0/0	0/0	0/0	0/0	0/0	CGGA|conservative_inframe_insertion|MODERATE|OS11G0187200|OS11G0187200|transcript|OS11T0187200-00|protein_coding|1/1|c.981_982insTCC|p.Ala327dup|998/1344|981/1296|327/431||,CGGA|upstream_gene_variant|MODIFIER|OS11G0187100|OS11G0187100|transcript|OS11T0187100-00|protein_coding||c.-1687_-1686insTCC|||||1687|,CGGA|downstream_gene_variant|MODIFIER|OS11G0187150|OS11G0187150|transcript|OS11T0187150-00|…
GATA28	chr11	4433133	CGCGGCGTCG	C	4332.79	0/0	0/0	0/0	0/0	0/0	0/0	0/0	0/0	0/0	0/0	0/0	0/0	0/0	0/0	1/1	0/0	0/0	1/1	0/0	0/0	0/0	0/0	0/0	0/0	C|disruptive_inframe_deletion|MODERATE|OS11G0187200|OS11G0187200|transcript|OS11T0187200-00|protein_coding|1/1|c.930_938delCGACGCCGC|p.Asp311_Ala313del|955/1344|930/1296|310/431||,C|upstream_gene_variant|MODIFIER|OS11G0187100|OS11G0187100|transcript|OS11T0187100-00|protein_coding||c.-1738_-1730delCGACGCCGC|||||1730|,C|downstream_gene_variant|MODIFIER|OS11G0187150|OS11G0187150|transcript|OS11T0187…
GATA28	chr11	4433156	C	T	21237.2	1/1	0/0	0/0	1/1	0/0	0/0	1/1	1/1	0/0	0/0	1/1	1/1	1/1	0/0	0/0	1/1	0/0	0/0	0/0	1/1	1/1	0/0	0/0	0/0	T|missense_variant|MODERATE|OS11G0187200|OS11G0187200|transcript|OS11T0187200-00|protein_coding|1/1|c.916G>A|p.Val306Ile|933/1344|916/1296|306/431||,T|upstream_gene_variant|MODIFIER|OS11G0187100|OS11G0187100|transcript|OS11T0187100-00|protein_coding||c.-1752G>A|||||1752|,T|downstream_gene_variant|MODIFIER|OS11G0187150|OS11G0187150|transcript|OS11T0187150-00|protein_coding||c.*170C>T|||||170|WARNI…
Pia (RGA4)	chr11	6545369	A	G	17899.2	1|1	0/0	1|1	0/0	1|1	0/0	0/0	1|1	0/0	1|1	1|1	1|1	1|1	0/0	0/0	1|1	0/0	0/0	1|1	0/0	0/0	0/0	0/0	0/0	G|missense_variant|MODERATE|OS11G0225100|OS11G0225100|transcript|OS11T0225100-01|protein_coding|1/2|c.602T>C|p.Val201Ala|658/3710|602/717|201/238||,G|upstream_gene_variant|MODIFIER|EPlOSAG00000039431|EPlOSAG00000039431|transcript|EPlOSAT00000040819|lincRNA||n.-1623A>G|||||1623|,G|downstream_gene_variant|MODIFIER|EPlOSAG00000003889|EPlOSAG00000003889|transcript|EPlOSAT00000005277|lincRNA||n.*1185T…
Pia (RGA4)	chr11	6545372	C	G	16818.9	1|1	0/0	1|1	0/0	1|1	0/0	0/0	1|1	0/0	1|1	1|1	1|1	1|1	0/0	0/0	1|1	0/0	0/0	1|1	0/0	0/0	0/0	0/0	0/0	G|missense_variant|MODERATE|OS11G0225100|OS11G0225100|transcript|OS11T0225100-01|protein_coding|1/2|c.599G>C|p.Gly200Ala|655/3710|599/717|200/238||,G|upstream_gene_variant|MODIFIER|EPlOSAG00000039431|EPlOSAG00000039431|transcript|EPlOSAT00000040819|lincRNA||n.-1620C>G|||||1620|,G|downstream_gene_variant|MODIFIER|EPlOSAG00000003889|EPlOSAG00000003889|transcript|EPlOSAT00000005277|lincRNA||n.*1182G…
Pia (RGA4)	chr11	6545379	C	A	16008.9	1|1	0/0	1|1	0/0	1|1	0/0	0/0	1|1	0/0	1|1	1|1	1|1	1|1	0/0	0/0	1|1	0/0	0/0	1|1	0/0	0/0	0/0	0/0	0/0	A|missense_variant|MODERATE|OS11G0225100|OS11G0225100|transcript|OS11T0225100-01|protein_coding|1/2|c.592G>T|p.Gly198Cys|648/3710|592/717|198/238||,A|upstream_gene_variant|MODIFIER|EPlOSAG00000039431|EPlOSAG00000039431|transcript|EPlOSAT00000040819|lincRNA||n.-1613C>A|||||1613|,A|downstream_gene_variant|MODIFIER|EPlOSAG00000003889|EPlOSAG00000003889|transcript|EPlOSAT00000005277|lincRNA||n.*1175G…
Pia (RGA4)	chr11	6545382	A	C	15513.9	1|1	0/0	1|1	0/0	1|1	0/0	0/0	1|1	0/0	1|1	1|1	1|1	1|1	0/0	0/0	1|1	0/0	0/0	1|1	0/0	0/0	0/0	0/0	0/0	C|missense_variant|MODERATE|OS11G0225100|OS11G0225100|transcript|OS11T0225100-01|protein_coding|1/2|c.589T>G|p.Ser197Ala|645/3710|589/717|197/238||,C|upstream_gene_variant|MODIFIER|EPlOSAG00000039431|EPlOSAG00000039431|transcript|EPlOSAT00000040819|lincRNA||n.-1610A>C|||||1610|,C|downstream_gene_variant|MODIFIER|EPlOSAG00000003889|EPlOSAG00000003889|transcript|EPlOSAT00000005277|lincRNA||n.*1172T…
Pia (RGA4)	chr11	6545392	G	C	15290	1|1	0/0	1|1	0/0	1|1	0/0	0/0	1|1	0/0	1|1	1|1	1|1	1|1	0/0	0/0	1|1	0/0	0/0	./.	0/0	0/0	0/0	0/0	0/0	C|missense_variant|MODERATE|OS11G0225100|OS11G0225100|transcript|OS11T0225100-01|protein_coding|1/2|c.579C>G|p.Asp193Glu|635/3710|579/717|193/238||,C|upstream_gene_variant|MODIFIER|EPlOSAG00000039431|EPlOSAG00000039431|transcript|EPlOSAT00000040819|lincRNA||n.-1600G>C|||||1600|,C|downstream_gene_variant|MODIFIER|EPlOSAG00000003889|EPlOSAG00000003889|transcript|EPlOSAT00000005277|lincRNA||n.*1162C…
Pia (RGA4)	chr11	6545397	T	G	15290	1|1	0/0	1|1	0/0	1|1	0/0	0/0	1|1	0/0	1|1	1|1	1|1	1|1	0/0	0/0	1|1	0/0	0/0	./.	0/0	0/0	0/0	0/0	0/0	G|missense_variant|MODERATE|OS11G0225100|OS11G0225100|transcript|OS11T0225100-01|protein_coding|1/2|c.574A>C|p.Thr192Pro|630/3710|574/717|192/238||,G|upstream_gene_variant|MODIFIER|EPlOSAG00000039431|EPlOSAG00000039431|transcript|EPlOSAT00000040819|lincRNA||n.-1595T>G|||||1595|,G|downstream_gene_variant|MODIFIER|EPlOSAG00000003889|EPlOSAG00000003889|transcript|EPlOSAT00000005277|lincRNA||n.*1157A…
Pia (RGA4)	chr11	6545399	GCAA	G	15110	1|1	0/0	1|1	0/0	1|1	0/0	0/0	1|1	0/0	1|1	1|1	1|1	1|1	0/0	0/0	1|1	0/0	0/0	./.	0/0	0/0	0/0	0/0	0/0	G|disruptive_inframe_deletion|MODERATE|OS11G0225100|OS11G0225100|transcript|OS11T0225100-01|protein_coding|1/2|c.569_571delTTG|p.Val190del|627/3710|569/717|190/238||,G|upstream_gene_variant|MODIFIER|EPlOSAG00000039431|EPlOSAG00000039431|transcript|EPlOSAT00000040819|lincRNA||n.-1592_-1590delCAA|||||1592|,G|downstream_gene_variant|MODIFIER|EPlOSAG00000003889|EPlOSAG00000003889|transcript|EPlOSAT00…
Pia (RGA4)	chr11	6545411	T	G	14390	1|1	0/0	1|1	0/0	1|1	0/0	0/0	1|1	0/0	1|1	1|1	1|1	1|1	0/0	0/0	1|1	0/0	0/0	./.	0/0	0/0	0/0	0/0	0/0	G|missense_variant|MODERATE|OS11G0225100|OS11G0225100|transcript|OS11T0225100-01|protein_coding|1/2|c.560A>C|p.Asn187Thr|616/3710|560/717|187/238||,G|upstream_gene_variant|MODIFIER|EPlOSAG00000039431|EPlOSAG00000039431|transcript|EPlOSAT00000040819|lincRNA||n.-1581T>G|||||1581|,G|downstream_gene_variant|MODIFIER|EPlOSAG00000003889|EPlOSAG00000003889|transcript|EPlOSAT00000005277|lincRNA||n.*1143A…
Pia (RGA4)	chr11	6545412	T	G	14525	1|1	0/0	1|1	0/0	1|1	0/0	0/0	1|1	0/0	1|1	1|1	1|1	1|1	0/0	0/0	1|1	0/0	0/0	./.	0/0	0/0	0/0	0/0	0/0	G|missense_variant|MODERATE|OS11G0225100|OS11G0225100|transcript|OS11T0225100-01|protein_coding|1/2|c.559A>C|p.Asn187His|615/3710|559/717|187/238||,G|upstream_gene_variant|MODIFIER|EPlOSAG00000039431|EPlOSAG00000039431|transcript|EPlOSAT00000040819|lincRNA||n.-1580T>G|||||1580|,G|downstream_gene_variant|MODIFIER|EPlOSAG00000003889|EPlOSAG00000003889|transcript|EPlOSAT00000005277|lincRNA||n.*1142A…
Pia (RGA4)	chr11	6545421	C	G	13940	1|1	0/0	1|1	0/0	1|1	0/0	0/0	1|1	0/0	1|1	1|1	1|1	1|1	0/0	0/0	1|1	0/0	0/0	./.	0/0	0/0	0/0	0/0	0/0	G|missense_variant|MODERATE|OS11G0225100|OS11G0225100|transcript|OS11T0225100-01|protein_coding|1/2|c.550G>C|p.Gly184Arg|606/3710|550/717|184/238||,G|upstream_gene_variant|MODIFIER|EPlOSAG00000039431|EPlOSAG00000039431|transcript|EPlOSAT00000040819|lincRNA||n.-1571C>G|||||1571|,G|downstream_gene_variant|MODIFIER|EPlOSAG00000003889|EPlOSAG00000003889|transcript|EPlOSAT00000005277|lincRNA||n.*1133G…
Pia (RGA4)	chr11	6545423	T	C	13445	1|1	0/0	1|1	0/0	1|1	0/0	0/0	1|1	0/0	1|1	1|1	1|1	1|1	0/0	0/0	1|1	0/0	0/0	./.	0/0	0/0	0/0	0/0	0/0	C|missense_variant|MODERATE|OS11G0225100|OS11G0225100|transcript|OS11T0225100-01|protein_coding|1/2|c.548A>G|p.His183Arg|604/3710|548/717|183/238||,C|upstream_gene_variant|MODIFIER|EPlOSAG00000039431|EPlOSAG00000039431|transcript|EPlOSAT00000040819|lincRNA||n.-1569T>C|||||1569|,C|downstream_gene_variant|MODIFIER|EPlOSAG00000003889|EPlOSAG00000003889|transcript|EPlOSAT00000005277|lincRNA||n.*1131A…
Pia (RGA4)	chr11	6545431	A	ACC	14075	1|1	0/0	1|1	0/0	1|1	0/0	0/0	1|1	0/0	1|1	1|1	1|1	1|1	0/0	0/0	1|1	0/0	0/0	./.	0/0	0/0	0/0	0/0	0/0	ACC|frameshift_variant|HIGH|OS11G0225100|OS11G0225100|transcript|OS11T0225100-01|protein_coding|1/2|c.539_540insGG|p.Pro181fs|595/3710|539/717|180/238||,ACC|upstream_gene_variant|MODIFIER|EPlOSAG00000039431|EPlOSAG00000039431|transcript|EPlOSAT00000040819|lincRNA||n.-1561_-1560insCC|||||1560|,ACC|downstream_gene_variant|MODIFIER|EPlOSAG00000003889|EPlOSAG00000003889|transcript|EPlOSAT00000005277|…
Pia (RGA4)	chr11	6545432	GAA	G	14210	1|1	0/0	1|1	0/0	1|1	0/0	0/0	1|1	0/0	1|1	1|1	1|1	1|1	0/0	0/0	1|1	0/0	0/0	./.	0/0	0/0	0/0	0/0	0/0	G|frameshift_variant|HIGH|OS11G0225100|OS11G0225100|transcript|OS11T0225100-01|protein_coding|1/2|c.537_538delTT|p.Pro182fs|594/3710|537/717|179/238||,G|upstream_gene_variant|MODIFIER|EPlOSAG00000039431|EPlOSAG00000039431|transcript|EPlOSAT00000040819|lincRNA||n.-1559_-1558delAA|||||1559|,G|downstream_gene_variant|MODIFIER|EPlOSAG00000003889|EPlOSAG00000003889|transcript|EPlOSAT00000005277|lincRN…
Pia (RGA4)	chr11	6545436	C	T	13850	1|1	0/0	1|1	0/0	1|1	0/0	0/0	1|1	0/0	1|1	1|1	1|1	1|1	0/0	0/0	1|1	0/0	0/0	./.	0/0	0/0	0/0	0/0	0/0	T|missense_variant|MODERATE|OS11G0225100|OS11G0225100|transcript|OS11T0225100-01|protein_coding|1/2|c.535G>A|p.Ala179Thr|591/3710|535/717|179/238||,T|upstream_gene_variant|MODIFIER|EPlOSAG00000039431|EPlOSAG00000039431|transcript|EPlOSAT00000040819|lincRNA||n.-1556C>T|||||1556|,T|downstream_gene_variant|MODIFIER|EPlOSAG00000003889|EPlOSAG00000003889|transcript|EPlOSAT00000005277|lincRNA||n.*1118G…
Pia (RGA4)	chr11	6545439	CGAAGAG	C	14030	1|1	0/0	1|1	0/0	1|1	0/0	0/0	1|1	0/0	1|1	1|1	1|1	1|1	0/0	0/0	1|1	0/0	0/0	./.	0/0	0/0	0/0	0/0	0/0	C|conservative_inframe_deletion|MODERATE|OS11G0225100|OS11G0225100|transcript|OS11T0225100-01|protein_coding|1/2|c.526_531delCTCTTC|p.Leu176_Phe177del|587/3710|526/717|176/238||,C|upstream_gene_variant|MODIFIER|EPlOSAG00000039431|EPlOSAG00000039431|transcript|EPlOSAT00000040819|lincRNA||n.-1552_-1547delGAAGAG|||||1552|,C|downstream_gene_variant|MODIFIER|EPlOSAG00000003889|EPlOSAG00000003889|trans…
Pia (RGA4)	chr11	6545454	C	G	14035	1|1	0/0	1|1	0/0	1|1	0/0	0/0	1|1	0/0	1|1	1|1	1|1	1|1	0/0	0/0	1|1	0/0	0/0	./.	0/0	0/0	0/0	0/0	0/0	G|missense_variant|MODERATE|OS11G0225100|OS11G0225100|transcript|OS11T0225100-01|protein_coding|1/2|c.517G>C|p.Ala173Pro|573/3710|517/717|173/238||,G|upstream_gene_variant|MODIFIER|EPlOSAG00000039431|EPlOSAG00000039431|transcript|EPlOSAT00000040819|lincRNA||n.-1538C>G|||||1538|,G|downstream_gene_variant|MODIFIER|EPlOSAG00000003889|EPlOSAG00000003889|transcript|EPlOSAT00000005277|lincRNA||n.*1100G…
Pia (RGA4)	chr11	6545517	G	T	13606.2	1/1	0/0	1|1	0/0	1|1	0/0	0/0	1|1	0/0	1/1	1/1	1|1	1|1	0/0	0/0	1/1	0/0	0/0	1/1	0/0	0/0	0/0	0/0	0/0	T|missense_variant|MODERATE|OS11G0225100|OS11G0225100|transcript|OS11T0225100-01|protein_coding|1/2|c.454C>A|p.Pro152Thr|510/3710|454/717|152/238||,T|upstream_gene_variant|MODIFIER|EPlOSAG00000039431|EPlOSAG00000039431|transcript|EPlOSAT00000040819|lincRNA||n.-1475G>T|||||1475|,T|downstream_gene_variant|MODIFIER|EPlOSAG00000003889|EPlOSAG00000003889|transcript|EPlOSAT00000005277|lincRNA||n.*1037C…
Pia (RGA4)	chr11	6545560	GCGGCGCCA	G	12400.7	1|1	0/0	1|1	0/0	1|1	0/0	0/0	1|1	0/0	1|1	1|1	1|1	1|1	0/0	0/0	1|1	0/0	0/0	1/1	0/0	0/0	0/0	0/0	0/0	G|frameshift_variant|HIGH|OS11G0225100|OS11G0225100|transcript|OS11T0225100-01|protein_coding|1/2|c.403_410delTGGCGCCG|p.Trp135fs|466/3710|403/717|135/238||,G|upstream_gene_variant|MODIFIER|EPlOSAG00000039431|EPlOSAG00000039431|transcript|EPlOSAT00000040819|lincRNA||n.-1431_-1424delCGGCGCCA|||||1431|,G|downstream_gene_variant|MODIFIER|EPlOSAG00000003889|EPlOSAG00000003889|transcript|EPlOSAT000000…
Pia (RGA4)	chr11	6545571	T	G	12163	1|1	0/0	1|1	0/0	1|1	0/0	0/0	1|1	0/0	1|1	1|1	1|1	1|1	0/0	0/0	1|1	0/0	0/0	1/1	0/0	0/0	0/0	0/0	0/0	G|missense_variant|MODERATE|OS11G0225100|OS11G0225100|transcript|OS11T0225100-01|protein_coding|1/2|c.400A>C|p.Thr134Pro|456/3710|400/717|134/238||,G|upstream_gene_variant|MODIFIER|EPlOSAG00000039431|EPlOSAG00000039431|transcript|EPlOSAT00000040819|lincRNA||n.-1421T>G|||||1421|,G|downstream_gene_variant|MODIFIER|EPlOSAG00000003889|EPlOSAG00000003889|transcript|EPlOSAT00000005277|lincRNA||n.*983A>…
Pia (RGA4)	chr11	6545576	C	G	11804.2	1|1	0/0	1|1	0/0	1|1	0/0	0/0	1|1	0/0	1|1	1|1	1|1	1|1	0/0	0/0	1|1	0/0	0/0	1/1	0/0	0/0	0/0	0/0	0/0	G|missense_variant|MODERATE|OS11G0225100|OS11G0225100|transcript|OS11T0225100-01|protein_coding|1/2|c.395G>C|p.Arg132Pro|451/3710|395/717|132/238||,G|upstream_gene_variant|MODIFIER|EPlOSAG00000039431|EPlOSAG00000039431|transcript|EPlOSAT00000040819|lincRNA||n.-1416C>G|||||1416|,G|downstream_gene_variant|MODIFIER|EPlOSAG00000003889|EPlOSAG00000003889|transcript|EPlOSAT00000005277|lincRNA||n.*978G>…
PIa (RGA5)	chr11	6554595	C	T	11921.2	1/1	0/0	1/1	0/0	1/1	0/0	0/0	1/1	0/0	1/1	1/1	1/1	1/1	0/0	0/0	1/1	0/0	0/0	1/1	0/0	0/0	0/0	0/0	0/0	T|missense_variant|MODERATE|OS11G0225300|OS11G0225300|transcript|OS11T0225300-01|protein_coding|1/3|c.68C>T|p.Pro23Leu|74/4236|68/3906|23/1301||,T|missense_variant|MODERATE|OS11G0225300|OS11G0225300|transcript|OS11T0225300-02|protein_coding|1/1|c.41C>T|p.Pro14Leu|42/864|41/807|14/268||WARNING_TRANSCRIPT_NO_START_CODON,T|3_prime_UTR_variant|MODIFIER|OS11G0225566|OS11G0225566|transcript|OS11T022556…
PIa (RGA5)	chr11	6554621	G	A	13788.2	1|1	0/0	1|1	0/0	1|1	0/0	0/0	1|1	0/0	1|1	1|1	1|1	1|1	0/0	0/0	1|1	0/0	0/0	1|1	0/0	0/0	0/0	0/0	0/0	A|missense_variant|MODERATE|OS11G0225300|OS11G0225300|transcript|OS11T0225300-01|protein_coding|1/3|c.94G>A|p.Glu32Lys|100/4236|94/3906|32/1301||,A|missense_variant|MODERATE|OS11G0225300|OS11G0225300|transcript|OS11T0225300-02|protein_coding|1/1|c.67G>A|p.Glu23Lys|68/864|67/807|23/268||WARNING_TRANSCRIPT_NO_START_CODON,A|3_prime_UTR_variant|MODIFIER|OS11G0225566|OS11G0225566|transcript|OS11T02255…
PIa (RGA5)	chr11	6554635	C	G	13498.2	1|1	0/0	1|1	0/0	1|1	0/0	0/0	1|1	0/0	1|1	1|1	1|1	1|1	0/0	0/0	1|1	0/0	0/0	1|1	0/0	0/0	0/0	0/0	0/0	G|missense_variant|MODERATE|OS11G0225300|OS11G0225300|transcript|OS11T0225300-01|protein_coding|1/3|c.108C>G|p.Asp36Glu|114/4236|108/3906|36/1301||,G|missense_variant|MODERATE|OS11G0225300|OS11G0225300|transcript|OS11T0225300-02|protein_coding|1/1|c.81C>G|p.Asp27Glu|82/864|81/807|27/268||WARNING_TRANSCRIPT_NO_START_CODON,G|3_prime_UTR_variant|MODIFIER|OS11G0225566|OS11G0225566|transcript|OS11T022…
PIa (RGA5)	chr11	6554676	C	T	11913.9	1|1	0/0	1|1	0/0	1|1	0/0	0/0	1|1	0/0	1|1	1|1	1|1	1|1	0/0	0/0	1|1	0/0	0/0	1|1	0/0	0/0	0/0	0/0	0/0	T|missense_variant|MODERATE|OS11G0225300|OS11G0225300|transcript|OS11T0225300-01|protein_coding|1/3|c.149C>T|p.Ala50Val|155/4236|149/3906|50/1301||,T|missense_variant|MODERATE|OS11G0225566|OS11G0225566|transcript|OS11T0225566-00|protein_coding|3/3|c.440G>A|p.Gly147Asp|2414/2541|440/456|147/151||,T|missense_variant|MODERATE|OS11G0225300|OS11G0225300|transcript|OS11T0225300-02|protein_coding|1/1|c.…
PIa (RGA5)	chr11	6554678	G	T	12409.1	1|1	0/0	1|1	0/0	1|1	0/0	0/0	1|1	0/0	1|1	1|1	1|1	1|1	0/0	0/0	1|1	0/0	0/0	1|1	0/0	0/0	0/0	0/0	0/0	T|missense_variant|MODERATE|OS11G0225300|OS11G0225300|transcript|OS11T0225300-01|protein_coding|1/3|c.151G>T|p.Ala51Ser|157/4236|151/3906|51/1301||,T|missense_variant|MODERATE|OS11G0225300|OS11G0225300|transcript|OS11T0225300-02|protein_coding|1/1|c.124G>T|p.Ala42Ser|125/864|124/807|42/268||WARNING_TRANSCRIPT_NO_START_CODON,T|synonymous_variant|LOW|OS11G0225566|OS11G0225566|transcript|OS11T022556…
PIa (RGA5)	chr11	6554692	G	C	15424.2	1|1	0/0	1|1	0/0	1|1	0/0	0/0	1|1	0/0	1|1	1|1	1|1	1|1	0/0	0/0	1|1	0/0	0/0	1|1	0/0	0/0	0/0	0/0	0/0	C|missense_variant|MODERATE|OS11G0225300|OS11G0225300|transcript|OS11T0225300-01|protein_coding|1/3|c.165G>C|p.Gln55His|171/4236|165/3906|55/1301||,C|missense_variant|MODERATE|OS11G0225566|OS11G0225566|transcript|OS11T0225566-00|protein_coding|3/3|c.424C>G|p.Leu142Val|2398/2541|424/456|142/151||,C|missense_variant|MODERATE|OS11G0225300|OS11G0225300|transcript|OS11T0225300-02|protein_coding|1/1|c.…
PIa (RGA5)	chr11	6554696	A	G	15739.2	1|1	0/0	1|1	0/0	1|1	0/0	0/0	1|1	0/0	1|1	1|1	1|1	1|1	0/0	0/0	1|1	0/0	0/0	1|1	0/0	0/0	0/0	0/0	0/0	G|missense_variant|MODERATE|OS11G0225300|OS11G0225300|transcript|OS11T0225300-01|protein_coding|1/3|c.169A>G|p.Met57Val|175/4236|169/3906|57/1301||,G|missense_variant|MODERATE|OS11G0225300|OS11G0225300|transcript|OS11T0225300-02|protein_coding|1/1|c.142A>G|p.Met48Val|143/864|142/807|48/268||WARNING_TRANSCRIPT_NO_START_CODON,G|synonymous_variant|LOW|OS11G0225566|OS11G0225566|transcript|OS11T022556…
PIa (RGA5)	chr11	6554712	G	C	17899.2	1|1	0/0	1|1	0/0	1|1	0/0	0/0	1|1	0/0	1|1	1|1	1|1	1|1	0/0	0/0	1|1	0/0	0/0	1|1	0/0	0/0	0/0	0/0	0/0	C|missense_variant|MODERATE|OS11G0225300|OS11G0225300|transcript|OS11T0225300-01|protein_coding|1/3|c.185G>C|p.Ser62Thr|191/4236|185/3906|62/1301||,C|missense_variant|MODERATE|OS11G0225566|OS11G0225566|transcript|OS11T0225566-00|protein_coding|3/3|c.404C>G|p.Ala135Gly|2378/2541|404/456|135/151||,C|missense_variant|MODERATE|OS11G0225300|OS11G0225300|transcript|OS11T0225300-02|protein_coding|1/1|c.…
PIa (RGA5)	chr11	6554718	G	A	18310.2	1|1	0/0	1|1	0/0	1|1	0/0	0/0	1|1	0/0	1|1	1|1	1|1	1|1	0/0	0/0	1|1	0/0	0/0	1/1	0/0	0/0	0/0	0/0	0/0	A|missense_variant|MODERATE|OS11G0225300|OS11G0225300|transcript|OS11T0225300-01|protein_coding|1/3|c.191G>A|p.Arg64Lys|197/4236|191/3906|64/1301||,A|missense_variant|MODERATE|OS11G0225566|OS11G0225566|transcript|OS11T0225566-00|protein_coding|3/3|c.398C>T|p.Pro133Leu|2372/2541|398/456|133/151||,A|missense_variant|MODERATE|OS11G0225300|OS11G0225300|transcript|OS11T0225300-02|protein_coding|1/1|c.…
PIa (RGA5)	chr11	6554727	A	T	18454.2	1|1	0/0	1|1	0/0	1|1	0/0	0/0	1|1	0/0	1|1	1|1	1|1	1|1	0/0	0/0	1|1	0/0	0/0	1|1	0/0	0/0	0/0	0/0	0/0	T|missense_variant|MODERATE|OS11G0225300|OS11G0225300|transcript|OS11T0225300-01|protein_coding|1/3|c.200A>T|p.Tyr67Phe|206/4236|200/3906|67/1301||,T|missense_variant|MODERATE|OS11G0225566|OS11G0225566|transcript|OS11T0225566-00|protein_coding|3/3|c.389T>A|p.Val130Glu|2363/2541|389/456|130/151||,T|missense_variant|MODERATE|OS11G0225300|OS11G0225300|transcript|OS11T0225300-02|protein_coding|1/1|c.…
PIa (RGA5)	chr11	6554829	T	A	19792.2	1|1	0/0	1|1	0/0	1|1	0/0	0/0	1|1	0/0	1|1	1|1	1|1	1|1	0/0	0/0	1|1	0/0	0/0	1|1	0/0	0/0	0/0	0/0	0/0	A|missense_variant|MODERATE|OS11G0225300|OS11G0225300|transcript|OS11T0225300-01|protein_coding|1/3|c.302T>A|p.Val101Asp|308/4236|302/3906|101/1301||,A|missense_variant|MODERATE|OS11G0225566|OS11G0225566|transcript|OS11T0225566-00|protein_coding|3/3|c.287A>T|p.Asn96Ile|2261/2541|287/456|96/151||,A|missense_variant|MODERATE|OS11G0225300|OS11G0225300|transcript|OS11T0225300-02|protein_coding|1/1|c.…
PIa (RGA5)	chr11	6554830	T	G	20017.2	1|1	0/0	1|1	0/0	1|1	0/0	0/0	1|1	0/0	1|1	1|1	1|1	1|1	0/0	0/0	1|1	0/0	0/0	1|1	0/0	0/0	0/0	0/0	0/0	G|missense_variant|MODERATE|OS11G0225566|OS11G0225566|transcript|OS11T0225566-00|protein_coding|3/3|c.286A>C|p.Asn96His|2260/2541|286/456|96/151||,G|synonymous_variant|LOW|OS11G0225300|OS11G0225300|transcript|OS11T0225300-01|protein_coding|1/3|c.303T>G|p.Val101Val|309/4236|303/3906|101/1301||,G|synonymous_variant|LOW|OS11G0225300|OS11G0225300|transcript|OS11T0225300-02|protein_coding|1/1|c.276T>G…
PIa (RGA5)	chr11	6554853	T	C	20959.2	1|1	0/0	1|1	0/0	1|1	0/0	0/0	1|1	0/0	1|1	1|1	1|1	1|1	0/0	0/0	1|1	0/0	0/0	1|1	0/0	0/0	0/0	0/0	0/0	C|missense_variant|MODERATE|OS11G0225300|OS11G0225300|transcript|OS11T0225300-01|protein_coding|1/3|c.326T>C|p.Val109Ala|332/4236|326/3906|109/1301||,C|missense_variant|MODERATE|OS11G0225566|OS11G0225566|transcript|OS11T0225566-00|protein_coding|3/3|c.263A>G|p.His88Arg|2237/2541|263/456|88/151||,C|missense_variant|MODERATE|OS11G0225300|OS11G0225300|transcript|OS11T0225300-02|protein_coding|1/1|c.…
PIa (RGA5)	chr11	6554858	G	A	20734.2	1|1	0/0	1|1	0/0	1|1	0/0	0/0	1|1	0/0	1|1	1|1	1|1	1|1	0/0	0/0	1|1	0/0	0/0	1|1	0/0	0/0	0/0	0/0	0/0	A|missense_variant|MODERATE|OS11G0225300|OS11G0225300|transcript|OS11T0225300-01|protein_coding|1/3|c.331G>A|p.Val111Ile|337/4236|331/3906|111/1301||,A|missense_variant|MODERATE|OS11G0225300|OS11G0225300|transcript|OS11T0225300-02|protein_coding|1/1|c.304G>A|p.Val102Ile|305/864|304/807|102/268||WARNING_TRANSCRIPT_NO_START_CODON,A|synonymous_variant|LOW|OS11G0225566|OS11G0225566|transcript|OS11T02…
PIa (RGA5)	chr11	6554877	C	A	20554.2	1|1	0/0	1|1	0/0	1|1	0/0	0/0	1|1	0/0	1|1	1|1	1|1	1|1	0/0	0/0	1|1	0/0	0/0	1|1	0/0	0/0	0/0	0/0	0/0	A|missense_variant|MODERATE|OS11G0225300|OS11G0225300|transcript|OS11T0225300-01|protein_coding|1/3|c.350C>A|p.Thr117Lys|356/4236|350/3906|117/1301||,A|missense_variant|MODERATE|OS11G0225566|OS11G0225566|transcript|OS11T0225566-00|protein_coding|3/3|c.239G>T|p.Arg80Leu|2213/2541|239/456|80/151||,A|missense_variant|MODERATE|OS11G0225300|OS11G0225300|transcript|OS11T0225300-02|protein_coding|1/1|c.…
PIa (RGA5)	chr11	6554880	A	C	21319.2	1|1	0/0	1|1	0/0	1|1	0/0	0/0	1|1	0/0	1|1	1|1	1|1	1|1	0/0	0/0	1|1	0/0	0/0	1|1	0/0	0/0	0/0	0/0	0/0	C|missense_variant|MODERATE|OS11G0225300|OS11G0225300|transcript|OS11T0225300-01|protein_coding|1/3|c.353A>C|p.Gln118Pro|359/4236|353/3906|118/1301||,C|missense_variant|MODERATE|OS11G0225566|OS11G0225566|transcript|OS11T0225566-00|protein_coding|3/3|c.236T>G|p.Leu79Arg|2210/2541|236/456|79/151||,C|missense_variant|MODERATE|OS11G0225300|OS11G0225300|transcript|OS11T0225300-02|protein_coding|1/1|c.…
PIa (RGA5)	chr11	6554881	G	C	21454.2	1|1	0/0	1|1	0/0	1|1	0/0	0/0	1|1	0/0	1|1	1|1	1|1	1|1	0/0	0/0	1|1	0/0	0/0	1|1	0/0	0/0	0/0	0/0	0/0	C|missense_variant|MODERATE|OS11G0225300|OS11G0225300|transcript|OS11T0225300-01|protein_coding|1/3|c.354G>C|p.Gln118His|360/4236|354/3906|118/1301||,C|missense_variant|MODERATE|OS11G0225566|OS11G0225566|transcript|OS11T0225566-00|protein_coding|3/3|c.235C>G|p.Leu79Val|2209/2541|235/456|79/151||,C|missense_variant|MODERATE|OS11G0225300|OS11G0225300|transcript|OS11T0225300-02|protein_coding|1/1|c.…
PIa (RGA5)	chr11	6554897	C	A	20149.2	1|1	0/0	1|1	0/0	1|1	0/0	0/0	1|1	0/0	1|1	1|1	1|1	1|1	0/0	0/0	1|1	0/0	0/0	1|1	0/0	0/0	0/0	0/0	0/0	A|missense_variant|MODERATE|OS11G0225300|OS11G0225300|transcript|OS11T0225300-01|protein_coding|1/3|c.370C>A|p.Leu124Ile|376/4236|370/3906|124/1301||,A|missense_variant|MODERATE|OS11G0225566|OS11G0225566|transcript|OS11T0225566-00|protein_coding|3/3|c.219G>T|p.Glu73Asp|2193/2541|219/456|73/151||,A|missense_variant|MODERATE|OS11G0225300|OS11G0225300|transcript|OS11T0225300-02|protein_coding|1/1|c.…
PIa (RGA5)	chr11	6554949	A	T	1182.86	./.	0/0	./.	0/0	./.	0/0	0/0	./.	0/0	./.	1|1	./.	1|1	0/0	0/0	./.	0/0	0/0	./.	0/0	0/0	0/0	0/0	0/0	T|missense_variant|MODERATE|OS11G0225300|OS11G0225300|transcript|OS11T0225300-01|protein_coding|1/3|c.422A>T|p.His141Leu|428/4236|422/3906|141/1301||,T|missense_variant|MODERATE|OS11G0225566|OS11G0225566|transcript|OS11T0225566-00|protein_coding|3/3|c.167T>A|p.Val56Glu|2141/2541|167/456|56/151||,T|missense_variant|MODERATE|OS11G0225300|OS11G0225300|transcript|OS11T0225300-02|protein_coding|1/1|c.…
PIa (RGA5)	chr11	6555002	CA	C	283.62	./.	0/0	./.	0/0	./.	0/0	0/0	./.	0/0	./.	1|1	./.	1|1	0/0	0/0	./.	0/0	0/0	./.	0/0	0/0	0/0	0/0	0/0	C|frameshift_variant|HIGH|OS11G0225300|OS11G0225300|transcript|OS11T0225300-01|protein_coding|1/3|c.476delA|p.His159fs|482/4236|476/3906|159/1301||,C|frameshift_variant|HIGH|OS11G0225566|OS11G0225566|transcript|OS11T0225566-00|protein_coding|3/3|c.113delT|p.Val38fs|2087/2541|113/456|38/151||,C|frameshift_variant|HIGH|OS11G0225300|OS11G0225300|transcript|OS11T0225300-02|protein_coding|1/1|c.449del…
PIa (RGA5)	chr11	6555341	T	C	106.11	./.	0/0	./.	0/0	./.	0/0	0/0	./.	0/0	./.	./.	./.	1|1	0/0	0/0	1|1	0/0	0/0	./.	0/0	0/0	0/0	0/0	0/0	C|missense_variant|MODERATE|OS11G0225300|OS11G0225300|transcript|OS11T0225300-01|protein_coding|1/3|c.814T>C|p.Tyr272His|820/4236|814/3906|272/1301||,C|missense_variant|MODERATE|OS11G0225300|OS11G0225300|transcript|OS11T0225300-02|protein_coding|1/1|c.787T>C|p.Tyr263His|788/864|787/807|263/268||WARNING_TRANSCRIPT_NO_START_CODON,C|5_prime_UTR_premature_start_codon_gain_variant|LOW|OS11G0225566|OS1…
Pb1	chr11	22862496	G	A	5617.76	1|1	0/0	0/0	0/0	0/0	0/0	0/0	0/0	0/0	0/0	0/0	0/0	0/0	0/0	.	0/0	0/0	0/0	0/0	0/0	1/1	0/0	0/0	0/0	A|missense_variant|MODERATE|OS11G0598500|OS11G0598500|transcript|OS11T0598500-00|protein_coding|1/1|c.50G>A|p.Arg17His|50/3873|50/3873|17/1290||
Pb1	chr11	22862630	T	C	47571	1|1	1|1	0/0	1|1	0/0	1|1	0/0	0/0	1|1	0/0	0/0	0/0	0/0	1|1	1|1	0/0	1|1	1|1	./.	1|1	1|1	1|1	1|1	1|1	C|missense_variant|MODERATE|OS11G0598500|OS11G0598500|transcript|OS11T0598500-00|protein_coding|1/1|c.184T>C|p.Cys62Arg|184/3873|184/3873|62/1290||
Pb1	chr11	22862644	A	C	50031	1|1	1|1	0/0	1|1	0/0	1|1	0/0	0/0	1|1	0/0	0/0	0/0	0/0	1|1	1|1	0/0	1|1	1|1	./.	1|1	1|1	1|1	1|1	1|1	C|missense_variant|MODERATE|OS11G0598500|OS11G0598500|transcript|OS11T0598500-00|protein_coding|1/1|c.198A>C|p.Lys66Asn|198/3873|198/3873|66/1290||
Pb1	chr11	22862780	G	A	59123.8	./.	1|1	0/0	1|1	0/0	1|1	0/0	0/0	1|1	0/0	0/0	0/0	0/0	1|1	./.	0/0	1|1	1|1	1|1	1|1	./.	1|1	1|1	1|1	A|missense_variant|MODERATE|OS11G0598500|OS11G0598500|transcript|OS11T0598500-00|protein_coding|1/1|c.334G>A|p.Val112Ile|334/3873|334/3873|112/1290||
Pb1	chr11	22862787	A	G	71880	1|1	1|1	0/0	1|1	0/0	1|1	0/0	0/0	1|1	0/0	0/0	0/0	0/0	1|1	1|1	0/0	1|1	1|1	1/1	1|1	1|1	1|1	1|1	1|1	G|missense_variant|MODERATE|OS11G0598500|OS11G0598500|transcript|OS11T0598500-00|protein_coding|1/1|c.341A>G|p.Gln114Arg|341/3873|341/3873|114/1290||
Pb1	chr11	22862801	A	G	71066	1|1	1|1	0/0	1|1	0/0	1/1	0/0	0/0	1|1	0/0	0/0	0/0	0/0	1|1	1|1	0/0	1|1	1|1	1/1	1|1	1|1	1|1	1|1	1|1	G|missense_variant|MODERATE|OS11G0598500|OS11G0598500|transcript|OS11T0598500-00|protein_coding|1/1|c.355A>G|p.Ile119Val|355/3873|355/3873|119/1290||
Pb1	chr11	22862907	A	C	62528	1|1	1|1	0/0	1|1	0/0	1|1	0/0	0/0	1|1	0/0	0/0	0/0	0/0	1|1	1|1	0/0	1|1	1|1	1|1	1|1	1|1	1|1	1|1	1|1	C|missense_variant|MODERATE|OS11G0598500|OS11G0598500|transcript|OS11T0598500-00|protein_coding|1/1|c.461A>C|p.Glu154Ala|461/3873|461/3873|154/1290||
Pb1	chr11	22862909	G	A	62004	1|1	1|1	0/0	1|1	0/0	1|1	0/0	0/0	1|1	0/0	0/0	0/0	0/0	1|1	1|1	0/0	1|1	1|1	1|1	1|1	1|1	1|1	1|1	1|1	A|missense_variant|MODERATE|OS11G0598500|OS11G0598500|transcript|OS11T0598500-00|protein_coding|1/1|c.463G>A|p.Gly155Ser|463/3873|463/3873|155/1290||
Pb1	chr11	22862943	A	AACATCAACTTGC	58222.1	1|1	1|1	0/0	1|1	0/0	1|1	0/0	0/0	1|1	0/0	0/0	0/0	0/0	1|1	1/1	0/0	1/1	1|1	./.	1/1	1|1	1|1	1/1	1|1	AACATCAACTTGC|disruptive_inframe_insertion|MODERATE|OS11G0598500|OS11G0598500|transcript|OS11T0598500-00|protein_coding|1/1|c.497_498insACATCAACTTGC|p.Glu166_Asp167insHisGlnLeuAla|498/3873|498/3873|166/1290||
Pb1	chr11	22862974	G	C	33314.8	.	1/1	0/0	1/1	0/0	1/1	0/0	0/0	1/1	0/0	0/0	0/0	0/0	1/1	./.	0/0	1/1	1/1	1/1	1/1	.	1/1	1/1	1/1	C|missense_variant|MODERATE|OS11G0598500|OS11G0598500|transcript|OS11T0598500-00|protein_coding|1/1|c.528G>C|p.Glu176Asp|528/3873|528/3873|176/1290||
Pb1	chr11	22863003	C	A	33257	1|1	1|1	0/0	1|1	0/0	1|1	0/0	0/0	1|1	0/0	0/0	0/0	0/0	1|1	1|1	0/0	1|1	1|1	1|1	1|1	1|1	1|1	1|1	1|1	A|missense_variant|MODERATE|OS11G0598500|OS11G0598500|transcript|OS11T0598500-00|protein_coding|1/1|c.557C>A|p.Ala186Glu|557/3873|557/3873|186/1290||
Pb1	chr11	22863034	T	TA	22602.1	1|1	1|1	0/0	1|1	0/0	1|1	0/0	0/0	1|1	0/0	0/0	0/0	0/0	1|1	1|1	0/0	1|1	1|1	./.	1|1	1|1	1|1	1|1	1|1	TA|frameshift_variant|HIGH|OS11G0598500|OS11G0598500|transcript|OS11T0598500-00|protein_coding|1/1|c.588_589insA|p.Pro197fs|589/3873|589/3873|197/1290||
Pb1	chr11	22863036	C	T	23672	1|1	1|1	0/0	1|1	0/0	1|1	0/0	0/0	1|1	0/0	0/0	0/0	0/0	1|1	1|1	0/0	1|1	1|1	./.	1|1	1|1	1|1	1|1	1|1	T|missense_variant|MODERATE|OS11G0598500|OS11G0598500|transcript|OS11T0598500-00|protein_coding|1/1|c.590C>T|p.Pro197Leu|590/3873|590/3873|197/1290||
Pb1	chr11	22863039	AC	A	23520	1|1	1|1	0/0	1|1	0/0	1|1	0/0	0/0	1|1	0/0	0/0	0/0	0/0	1|1	1|1	0/0	1|1	1|1	./.	1|1	1|1	1|1	1|1	1|1	A|frameshift_variant|HIGH|OS11G0598500|OS11G0598500|transcript|OS11T0598500-00|protein_coding|1/1|c.594delC|p.Asp198fs|594/3873|594/3873|198/1290||
Pb1	chr11	22863184	T	A	57063.8	.	1|1	0/0	1|1	0/0	1|1	0/0	0/0	1|1	0/0	0/0	0/0	0/0	1|1	./.	0/0	1|1	1|1	1|1	1|1	.	1|1	1|1	1|1	A|missense_variant|MODERATE|OS11G0598500|OS11G0598500|transcript|OS11T0598500-00|protein_coding|1/1|c.738T>A|p.Asp246Glu|738/3873|738/3873|246/1290||
Pb1	chr11	22863209	A	G	58398	1|1	1/1	0/0	1/1	0/0	1/1	0/0	0/0	1/1	0/0	0/0	0/0	0/0	1/1	1|1	0/0	1/1	1/1	1/1	1/1	1|1	1/1	1/1	1/1	G|missense_variant|MODERATE|OS11G0598500|OS11G0598500|transcript|OS11T0598500-00|protein_coding|1/1|c.763A>G|p.Ile255Val|763/3873|763/3873|255/1290||
Pb1	chr11	22863256	C	G	61694	1|1	1|1	0/0	1|1	0/0	1|1	0/0	0/0	1|1	0/0	0/0	0/0	0/0	1|1	1|1	0/0	1|1	1|1	1|1	1|1	1|1	1|1	1|1	1|1	G|missense_variant|MODERATE|OS11G0598500|OS11G0598500|transcript|OS11T0598500-00|protein_coding|1/1|c.810C>G|p.His270Gln|810/3873|810/3873|270/1290||
Pb1	chr11	22863258	T	C	63023	1|1	1|1	0/0	1|1	0/0	1|1	0/0	0/0	1|1	0/0	0/0	0/0	0/0	1|1	1|1	0/0	1|1	1|1	1|1	1|1	1|1	1|1	1|1	1|1	C|missense_variant|MODERATE|OS11G0598500|OS11G0598500|transcript|OS11T0598500-00|protein_coding|1/1|c.812T>C|p.Val271Ala|812/3873|812/3873|271/1290||
Pb1	chr11	22863263	T	G	64461	1|1	1|1	0/0	1|1	0/0	1|1	0/0	0/0	1|1	0/0	0/0	0/0	0/0	1|1	1|1	0/0	1|1	1|1	1|1	1|1	1|1	1|1	1|1	1|1	G|missense_variant|MODERATE|OS11G0598500|OS11G0598500|transcript|OS11T0598500-00|protein_coding|1/1|c.817T>G|p.Tyr273Asp|817/3873|817/3873|273/1290||
Pb1	chr11	22863272	G	A	56252.8	./.	1|1	0/0	1|1	0/0	1|1	0/0	0/0	1|1	0/0	0/0	0/0	0/0	1|1	.	0/0	1|1	1|1	1|1	1|1	.	1|1	1|1	1|1	A|missense_variant|MODERATE|OS11G0598500|OS11G0598500|transcript|OS11T0598500-00|protein_coding|1/1|c.826G>A|p.Asp276Asn|826/3873|826/3873|276/1290||
Pb1	chr11	22863302	T	C	63536	1|1	1|1	0/0	1|1	0/0	1|1	0/0	0/0	1|1	0/0	0/0	0/0	0/0	1|1	1|1	0/0	1|1	1|1	1|1	1|1	1|1	1|1	1|1	1|1	C|missense_variant|MODERATE|OS11G0598500|OS11G0598500|transcript|OS11T0598500-00|protein_coding|1/1|c.856T>C|p.Cys286Arg|856/3873|856/3873|286/1290||
Pb1	chr11	22863324	A	G	64858	1|1	1|1	0/0	1|1	0/0	1|1	0/0	0/0	1|1	0/0	0/0	0/0	0/0	1|1	1|1	0/0	1|1	1|1	1|1	1|1	1|1	1|1	1|1	1|1	G|missense_variant|MODERATE|OS11G0598500|OS11G0598500|transcript|OS11T0598500-00|protein_coding|1/1|c.878A>G|p.His293Arg|878/3873|878/3873|293/1290||
Pb1	chr11	22863356	G	A	68585	1|1	1|1	0/0	1|1	0/0	1|1	0/0	0/0	1|1	0/0	0/0	0/0	0/0	1|1	1|1	0/0	1|1	1|1	1|1	1|1	1|1	1|1	1|1	1|1	A|missense_variant|MODERATE|OS11G0598500|OS11G0598500|transcript|OS11T0598500-00|protein_coding|1/1|c.910G>A|p.Val304Ile|910/3873|910/3873|304/1290||
Pb1	chr11	22863380	A	G	59877.1	./.	1/1	0/0	1/1	0/0	1/1	0/0	0/0	1/1	0/0	0/0	0/0	0/0	1/1	1|1	0/0	1/1	1/1	1/1	1/1	1|1	1/1	1/1	1/1	G|missense_variant|MODERATE|OS11G0598500|OS11G0598500|transcript|OS11T0598500-00|protein_coding|1/1|c.934A>G|p.Lys312Glu|934/3873|934/3873|312/1290||
Pb1	chr11	22863399	G	A	71787.1	1|1	1|1	0/0	1|1	0/0	1|1	0/0	0/0	1|1	0/0	0/0	0/0	0/0	1|1	1|1	0/0	1|1	1|1	1|1	1|1	1|1	1|1	1|1	1|1	A|missense_variant|MODERATE|OS11G0598500|OS11G0598500|transcript|OS11T0598500-00|protein_coding|1/1|c.953G>A|p.Gly318Glu|953/3873|953/3873|318/1290||
Pb1	chr11	22863406	T	G	71488.1	1|1	1|1	0/0	1|1	0/0	1|1	0/0	0/0	1|1	0/0	0/0	0/0	0/0	1|1	1|1	0/0	1|1	1|1	1|1	1|1	1|1	1|1	1|1	1|1	G|missense_variant|MODERATE|OS11G0598500|OS11G0598500|transcript|OS11T0598500-00|protein_coding|1/1|c.960T>G|p.His320Gln|960/3873|960/3873|320/1290||
Pb1	chr11	22863476	G	C	53967	1|1	1/1	0/0	1|1	0/0	1|1	0/0	0/0	1|1	0/0	0/0	0/0	0/0	1|1	1|1	0/0	1|1	1|1	1|1	1|1	1|1	1|1	1|1	1|1	C|missense_variant|MODERATE|OS11G0598500|OS11G0598500|transcript|OS11T0598500-00|protein_coding|1/1|c.1030G>C|p.Val344Leu|1030/3873|1030/3873|344/1290||
Pb1	chr11	22865501	A	G	7829.31	1/1	./.	0/0	./.	0/0	./.	0/0	0/0	./.	0/0	0/0	0/0	0/0	./.	1/1	0/0	./.	./.	./.	./.	1/1	./.	./.	./.	G|missense_variant|MODERATE|OS11G0598500|OS11G0598500|transcript|OS11T0598500-00|protein_coding|1/1|c.3055A>G|p.Asn1019Asp|3055/3873|3055/3873|1019/1290||
Pb1	chr11	22865567	C	G	7835.31	1/1	./.	0/0	./.	0/0	./.	0/0	0/0	./.	0/0	0/0	0/0	0/0	./.	1/1	0/0	./.	./.	./.	./.	1/1	./.	./.	./.	G|missense_variant|MODERATE|OS11G0598500|OS11G0598500|transcript|OS11T0598500-00|protein_coding|1/1|c.3121C>G|p.Arg1041Gly|3121/3873|3121/3873|1041/1290||
Ptr	chr12	10822667	C	CA	11487.4	0/0	0/0	1/1	1/1	1/1	1/1	0/0	0/0	0/0	0/0	0/0	0/0	1/1	0/0	0/0	0/0	1/1	0/0	0/0	1/1	0/0	0/0	0/0	0/0	CA|frameshift_variant|HIGH|OS12G0285100|OS12G0285100|transcript|OS12T0285100-03|protein_coding|1/5|c.124dupA|p.Thr42fs|126/3389|125/3264|42/1087||WARNING_TRANSCRIPT_NO_START_CODON&INFO_REALIGN_3_PRIME,CA|5_prime_UTR_variant|MODIFIER|OS12G0285100|OS12G0285100|transcript|OS12T0285100-01|protein_coding|1/1|c.-283dupA|||||282|WARNING_TRANSCRIPT_NO_START_CODON&INFO_REALIGN_3_PRIME,CA|5_prime_UTR_varia…
Ptr	chr12	10822749	A	C	14134.4	0/0	0/0	1/1	1/1	1/1	1/1	0/0	0/0	0/0	0/0	0/0	0/0	1/1	0/0	0/0	0/0	1/1	0/0	0/0	1/1	0/0	0/0	0/0	0/0	C|missense_variant|MODERATE|OS12G0285100|OS12G0285100|transcript|OS12T0285100-03|protein_coding|1/5|c.205A>C|p.Ile69Leu|206/3389|205/3264|69/1087||WARNING_TRANSCRIPT_NO_START_CODON,C|5_prime_UTR_variant|MODIFIER|OS12G0285100|OS12G0285100|transcript|OS12T0285100-01|protein_coding|1/1|c.-202A>C|||||202|WARNING_TRANSCRIPT_NO_START_CODON,C|5_prime_UTR_variant|MODIFIER|OS12G0285100|OS12G0285100|transc…
Ptr	chr12	10822785	C	T	14317.4	0/0	0/0	1/1	1/1	1/1	1/1	0/0	0/0	0/0	0/0	0/0	0/0	1/1	0/0	0/0	0/0	1/1	0/0	0/0	1/1	0/0	0/0	0/0	0/0	T|missense_variant|MODERATE|OS12G0285100|OS12G0285100|transcript|OS12T0285100-03|protein_coding|1/5|c.241C>T|p.Pro81Ser|242/3389|241/3264|81/1087||WARNING_TRANSCRIPT_NO_START_CODON,T|5_prime_UTR_variant|MODIFIER|OS12G0285100|OS12G0285100|transcript|OS12T0285100-01|protein_coding|1/1|c.-166C>T|||||166|WARNING_TRANSCRIPT_NO_START_CODON,T|5_prime_UTR_variant|MODIFIER|OS12G0285100|OS12G0285100|transc…
Ptr	chr12	10822852	T	C	14599.4	0/0	0/0	1/1	1/1	1/1	1/1	0/0	0/0	0/0	0/0	0/0	0/0	1/1	0/0	0/0	0/0	1/1	0/0	0/0	1/1	0/0	0/0	0/0	0/0	C|missense_variant|MODERATE|OS12G0285100|OS12G0285100|transcript|OS12T0285100-03|protein_coding|1/5|c.308T>C|p.Ile103Thr|309/3389|308/3264|103/1087||WARNING_TRANSCRIPT_NO_START_CODON,C|5_prime_UTR_variant|MODIFIER|OS12G0285100|OS12G0285100|transcript|OS12T0285100-01|protein_coding|1/1|c.-99T>C|||||99|WARNING_TRANSCRIPT_NO_START_CODON,C|5_prime_UTR_variant|MODIFIER|OS12G0285100|OS12G0285100|transc…
Ptr	chr12	10823059	G	GT	8792.42	0/0	0/0	1/1	1/1	1/1	1/1	0/0	0/0	0/0	0/0	0/0	0/0	1/1	0/0	0/0	0/0	1/1	0/0	0/0	1/1	0/0	0/0	0/0	0/0	GT|frameshift_variant|HIGH|OS12G0285100|OS12G0285100|transcript|OS12T0285100-01|protein_coding|1/1|c.118dupT|p.Ser40fs|535/4061|119/237|40/78||WARNING_TRANSCRIPT_NO_START_CODON&INFO_REALIGN_3_PRIME,GT|intron_variant|MODIFIER|OS12G0285100|OS12G0285100|transcript|OS12T0285100-03|protein_coding|1/4|c.499+25dupT||||||WARNING_TRANSCRIPT_NO_START_CODON&INFO_REALIGN_3_PRIME,GT|intron_variant|MODIFIER|OS…
Ptr	chr12	10833368	TAAAAA	T	11332.4	0/0	0/0	1|1	1|1	1|1	1|1	0/0	0/0	0/0	0/0	0/0	0/0	1|1	0/0	0/0	0/0	1|1	0/0	0/0	1|1	0/0	0/0	0/0	0/0	T|frameshift_variant|HIGH|OS12G0285100|OS12G0285100|transcript|OS12T0285100-03|protein_coding|5/5|c.3140_3144delAAAAA|p.Lys1047fs|3141/3389|3140/3264|1047/1087||WARNING_TRANSCRIPT_NO_START_CODON&INFO_REALIGN_3_PRIME,T|frameshift_variant|HIGH|OS12G0285100|OS12G0285100|transcript|OS12T0285100-02|protein_coding|5/5|c.2708_2712delAAAAA|p.Lys903fs|3254/3461|2708/2832|903/943||WARNING_TRANSCRIPT_NO_STA…
Ptr	chr12	10833374	A	ATG	11372.4	0/0	0/0	1|1	1|1	1|1	1|1	0/0	0/0	0/0	0/0	0/0	0/0	1|1	0/0	0/0	0/0	1|1	0/0	0/0	1|1	0/0	0/0	0/0	0/0	ATG|frameshift_variant|HIGH|OS12G0285100|OS12G0285100|transcript|OS12T0285100-03|protein_coding|5/5|c.3144_3145insTG|p.Pro1049fs|3146/3389|3145/3264|1049/1087||WARNING_TRANSCRIPT_NO_START_CODON,ATG|frameshift_variant|HIGH|OS12G0285100|OS12G0285100|transcript|OS12T0285100-02|protein_coding|5/5|c.2712_2713insTG|p.Pro905fs|3259/3461|2713/2832|905/943||WARNING_TRANSCRIPT_NO_START_CODON,ATG|frameshift…
Ptr	chr12	10833378	GAAAAACCAA	G	11585.4	0/0	0/0	1|1	1|1	1|1	1|1	0/0	0/0	0/0	0/0	0/0	0/0	1|1	0/0	0/0	0/0	1|1	0/0	0/0	1|1	0/0	0/0	0/0	0/0	G|conservative_inframe_deletion|MODERATE|OS12G0285100|OS12G0285100|transcript|OS12T0285100-03|protein_coding|5/5|c.3151_3159delAAACCAAAA|p.Lys1051_Lys1053del|3152/3389|3151/3264|1051/1087||WARNING_TRANSCRIPT_NO_START_CODON&INFO_REALIGN_3_PRIME,G|conservative_inframe_deletion|MODERATE|OS12G0285100|OS12G0285100|transcript|OS12T0285100-02|protein_coding|5/5|c.2719_2727delAAACCAAAA|p.Lys907_Lys909del…
Ptr	chr12	10833393	G	C	11450.4	0/0	0/0	1|1	1|1	1|1	1|1	0/0	0/0	0/0	0/0	0/0	0/0	1|1	0/0	0/0	0/0	1|1	0/0	0/0	1|1	0/0	0/0	0/0	0/0	C|missense_variant|MODERATE|OS12G0285100|OS12G0285100|transcript|OS12T0285100-03|protein_coding|5/5|c.3163G>C|p.Ala1055Pro|3164/3389|3163/3264|1055/1087||WARNING_TRANSCRIPT_NO_START_CODON,C|missense_variant|MODERATE|OS12G0285100|OS12G0285100|transcript|OS12T0285100-02|protein_coding|5/5|c.2731G>C|p.Ala911Pro|3277/3461|2731/2832|911/943||WARNING_TRANSCRIPT_NO_START_CODON,C|missense_variant|MODERAT…
Ptr	chr12	10833400	G	A	12401.4	0/0	0/0	1|1	1|1	1|1	1|1	0/0	0/0	0/0	0/0	0/0	0/0	1|1	0/0	0/0	0/0	1|1	0/0	0/0	1|1	0/0	0/0	0/0	0/0	A|missense_variant|MODERATE|OS12G0285100|OS12G0285100|transcript|OS12T0285100-03|protein_coding|5/5|c.3170G>A|p.Arg1057Lys|3171/3389|3170/3264|1057/1087||WARNING_TRANSCRIPT_NO_START_CODON,A|missense_variant|MODERATE|OS12G0285100|OS12G0285100|transcript|OS12T0285100-02|protein_coding|5/5|c.2738G>A|p.Arg913Lys|3284/3461|2738/2832|913/943||WARNING_TRANSCRIPT_NO_START_CODON,A|missense_variant|MODERAT…
Ptr	chr12	10833409	T	C	12088.4	0/0	0/0	1|1	1|1	1|1	1|1	0/0	0/0	0/0	0/0	0/0	0/0	1|1	0/0	0/0	0/0	1|1	0/0	0/0	1|1	0/0	0/0	0/0	0/0	C|missense_variant|MODERATE|OS12G0285100|OS12G0285100|transcript|OS12T0285100-03|protein_coding|5/5|c.3179T>C|p.Leu1060Pro|3180/3389|3179/3264|1060/1087||WARNING_TRANSCRIPT_NO_START_CODON,C|missense_variant|MODERATE|OS12G0285100|OS12G0285100|transcript|OS12T0285100-02|protein_coding|5/5|c.2747T>C|p.Leu916Pro|3293/3461|2747/2832|916/943||WARNING_TRANSCRIPT_NO_START_CODON,C|missense_variant|MODERAT…
Ptr	chr12	10833420	G	A	12283.4	0/0	0/0	1|1	1|1	1|1	1|1	0/0	0/0	0/0	0/0	0/0	0/0	1|1	0/0	0/0	0/0	1|1	0/0	0/0	1|1	0/0	0/0	0/0	0/0	A|missense_variant|MODERATE|OS12G0285100|OS12G0285100|transcript|OS12T0285100-03|protein_coding|5/5|c.3190G>A|p.Val1064Met|3191/3389|3190/3264|1064/1087||WARNING_TRANSCRIPT_NO_START_CODON,A|missense_variant|MODERATE|OS12G0285100|OS12G0285100|transcript|OS12T0285100-02|protein_coding|5/5|c.2758G>A|p.Val920Met|3304/3461|2758/2832|920/943||WARNING_TRANSCRIPT_NO_START_CODON,A|missense_variant|MODERAT…
Ptr	chr12	10833423	A	C	13416.9	0/0	0/0	1|1	1|1	1|1	1|1	0/0	1/1	0/0	0/0	0/0	0/0	1|1	0/0	0/0	0/0	1|1	0/0	0/0	1|1	0/0	0/0	0/0	0/0	C|missense_variant|MODERATE|OS12G0285100|OS12G0285100|transcript|OS12T0285100-03|protein_coding|5/5|c.3193A>C|p.Thr1065Pro|3194/3389|3193/3264|1065/1087||WARNING_TRANSCRIPT_NO_START_CODON,C|missense_variant|MODERATE|OS12G0285100|OS12G0285100|transcript|OS12T0285100-02|protein_coding|5/5|c.2761A>C|p.Thr921Pro|3307/3461|2761/2832|921/943||WARNING_TRANSCRIPT_NO_START_CODON,C|missense_variant|MODERAT…
Ptr	chr12	10833435	A	C	11705.4	0/0	0/0	1/1	1/1	1/1	1/1	0/0	0/0	0/0	0/0	0/0	0/0	1/1	0/0	0/0	0/0	1/1	0/0	0/0	1/1	0/0	0/0	0/0	0/0	C|missense_variant|MODERATE|OS12G0285100|OS12G0285100|transcript|OS12T0285100-03|protein_coding|5/5|c.3205A>C|p.Thr1069Pro|3206/3389|3205/3264|1069/1087||WARNING_TRANSCRIPT_NO_START_CODON,C|missense_variant|MODERATE|OS12G0285100|OS12G0285100|transcript|OS12T0285100-02|protein_coding|5/5|c.2773A>C|p.Thr925Pro|3319/3461|2773/2832|925/943||WARNING_TRANSCRIPT_NO_START_CODON,C|missense_variant|MODERAT…
Ptr	chr12	10833448	T	A	11930.4	0/0	0/0	1/1	1/1	1/1	1/1	0/0	0/0	0/0	0/0	0/0	0/0	1/1	0/0	0/0	0/0	1/1	0/0	0/0	1/1	0/0	0/0	0/0	0/0	A|missense_variant|MODERATE|OS12G0285100|OS12G0285100|transcript|OS12T0285100-03|protein_coding|5/5|c.3218T>A|p.Phe1073Tyr|3219/3389|3218/3264|1073/1087||WARNING_TRANSCRIPT_NO_START_CODON,A|missense_variant|MODERATE|OS12G0285100|OS12G0285100|transcript|OS12T0285100-02|protein_coding|5/5|c.2786T>A|p.Phe929Tyr|3332/3461|2786/2832|929/943||WARNING_TRANSCRIPT_NO_START_CODON,A|missense_variant|MODERAT…
Ptr	chr12	10833460	G	T	12687.4	0/0	0/0	1/1	1/1	1/1	1/1	0/0	0/0	0/0	0/0	0/0	0/0	1/1	0/0	0/0	0/0	1/1	0/0	0/0	1/1	0/0	0/0	0/0	0/0	T|missense_variant|MODERATE|OS12G0285100|OS12G0285100|transcript|OS12T0285100-03|protein_coding|5/5|c.3230G>T|p.Gly1077Val|3231/3389|3230/3264|1077/1087||WARNING_TRANSCRIPT_NO_START_CODON,T|missense_variant|MODERATE|OS12G0285100|OS12G0285100|transcript|OS12T0285100-02|protein_coding|5/5|c.2798G>T|p.Gly933Val|3344/3461|2798/2832|933/943||WARNING_TRANSCRIPT_NO_START_CODON,T|missense_variant|MODERAT…

## Sheet: Sheet2
1	OsWD40-19
2	RD
3	HESO1
4	sd1
5	SMG1
6	GS3
7	Hd6
8	Pi21
9	NAL1
10	HD3B
11	Hd1
12	BZR1
13	Hd18
14	GATA28
15	PIA (Os11gRGA4)
16	PIA (Os11gRGA5)
17	Pb1
18	Pi19
