# Supplementary figures and images for: Genomic Variation in Korean japonica Rice Varieties
Source: MDPI journal article supplement (doi:10.3390/genes12111749), 2021-10-30

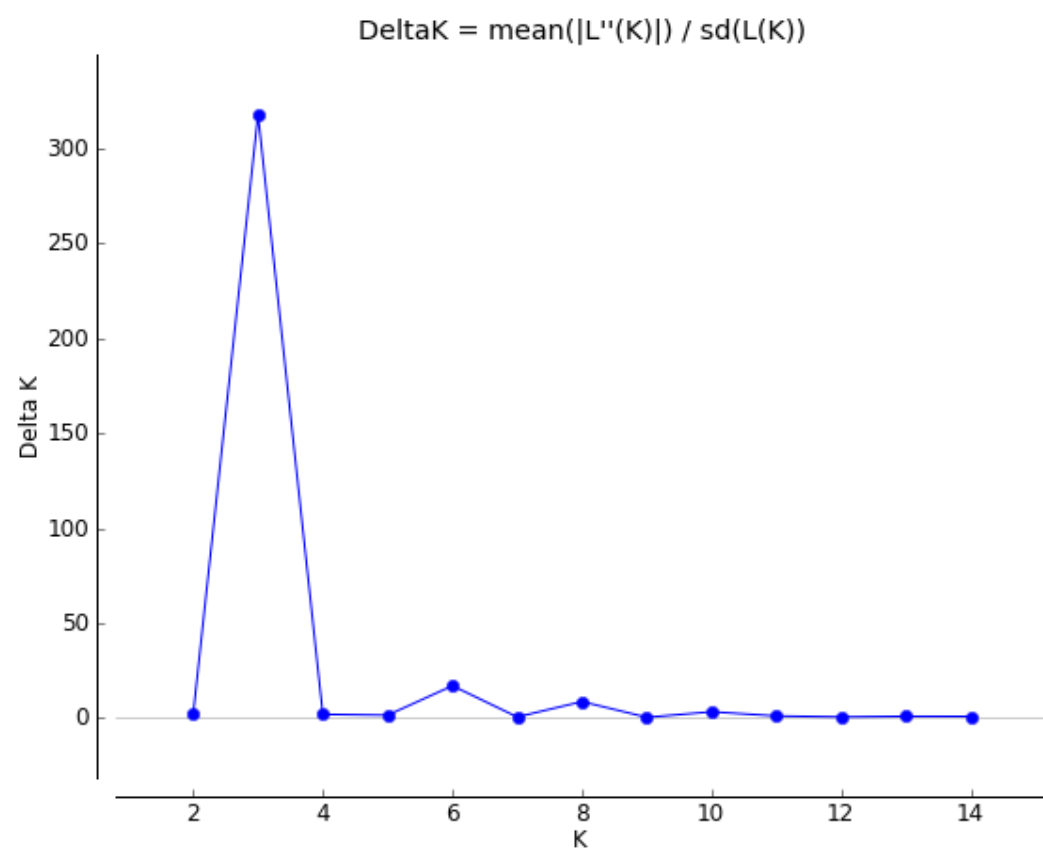

Figure S1. Estimation of Population Using LnP(D) Derived  $\Delta K$  for  $K$  from 1 to 15.

Supplement: s1 [file s1]
